# Supplementary material for: Effector membrane translocation biosensors reveal G protein and βarrestin coupling profiles of 100 therapeutically relevant GPCRs
Source: eLife journal article supplement (doi:10.7554/elife.74101), 2022-03-18

# GPCR: 5-HT<sub>1A</sub>

Ligand: Serotonin

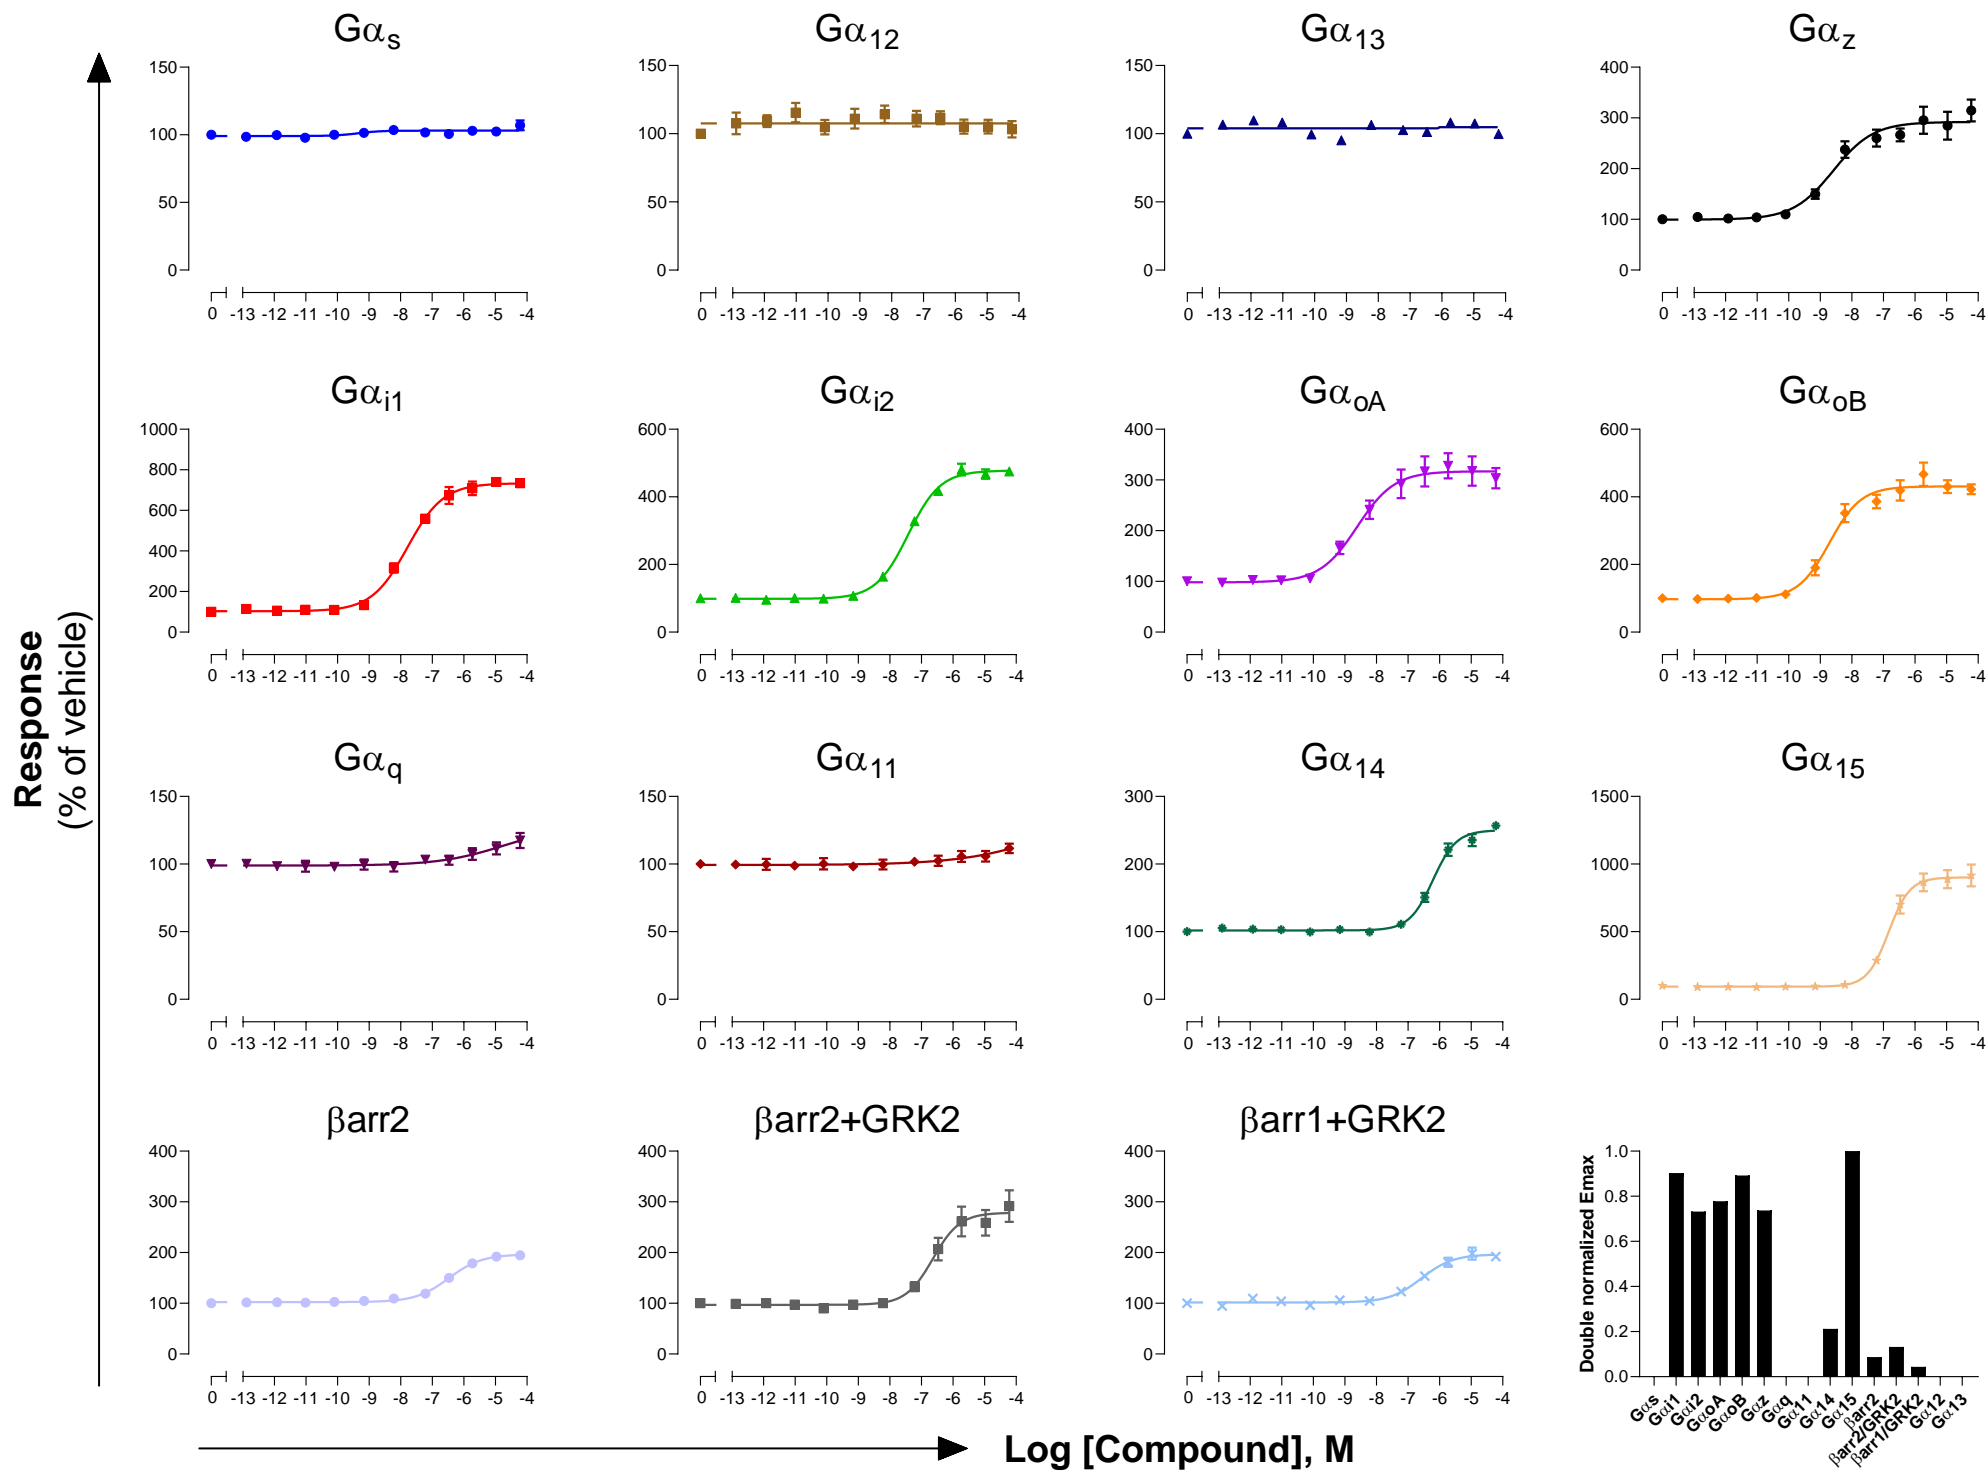

# GPCR: 5-HT<sub>1B</sub>

Ligand: Serotonin

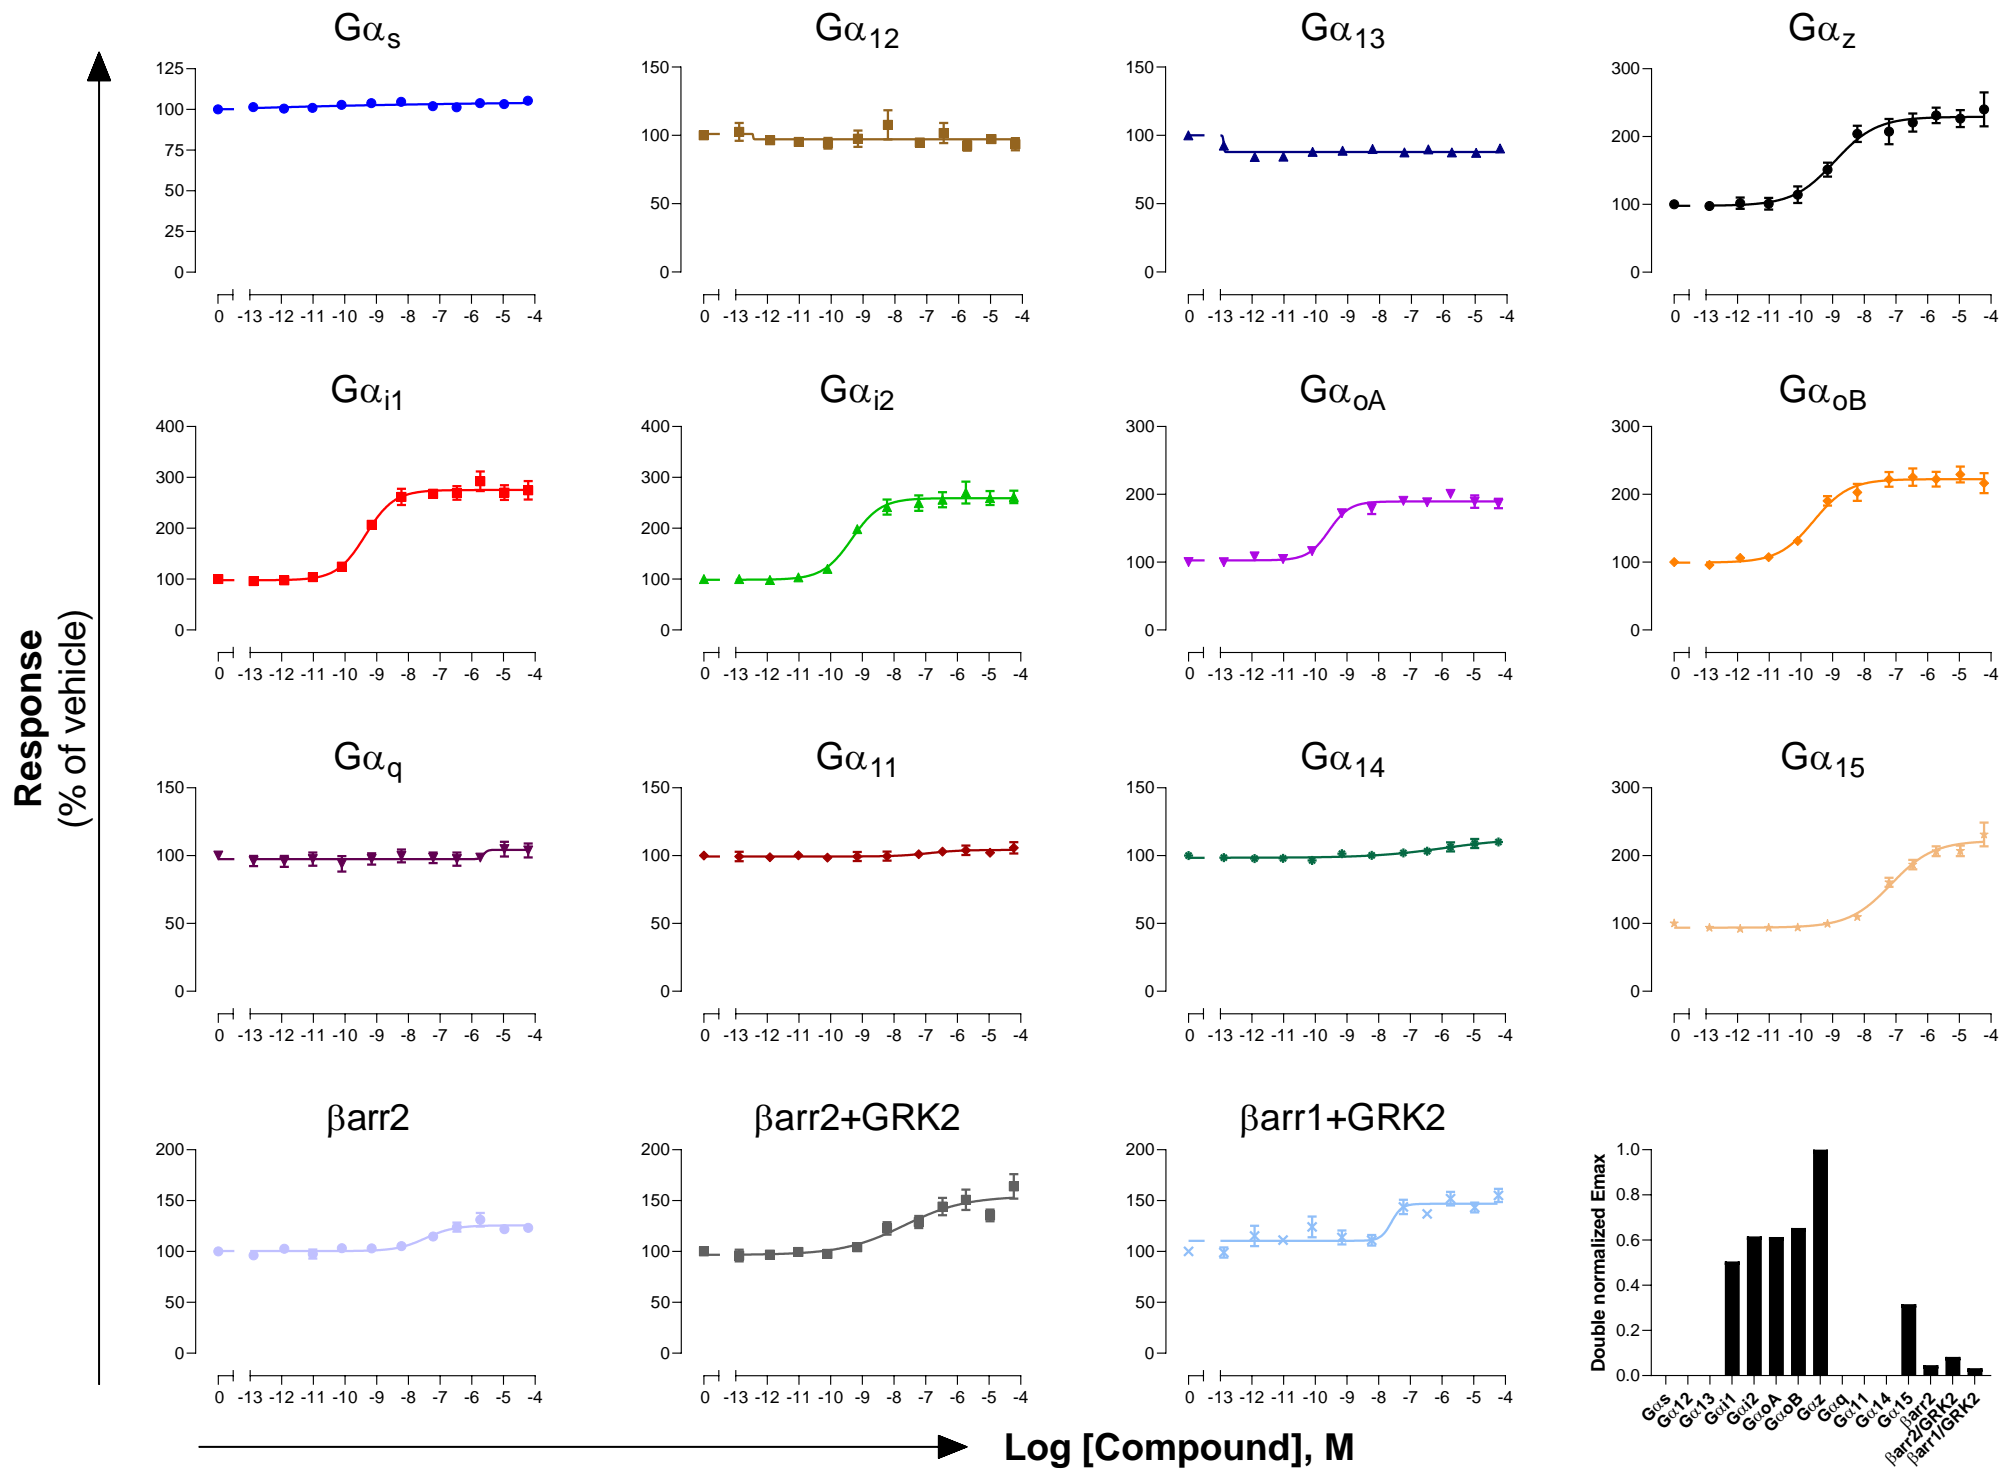

# GPCR: 5-HT<sub>1D</sub>

Ligand: Serotonin

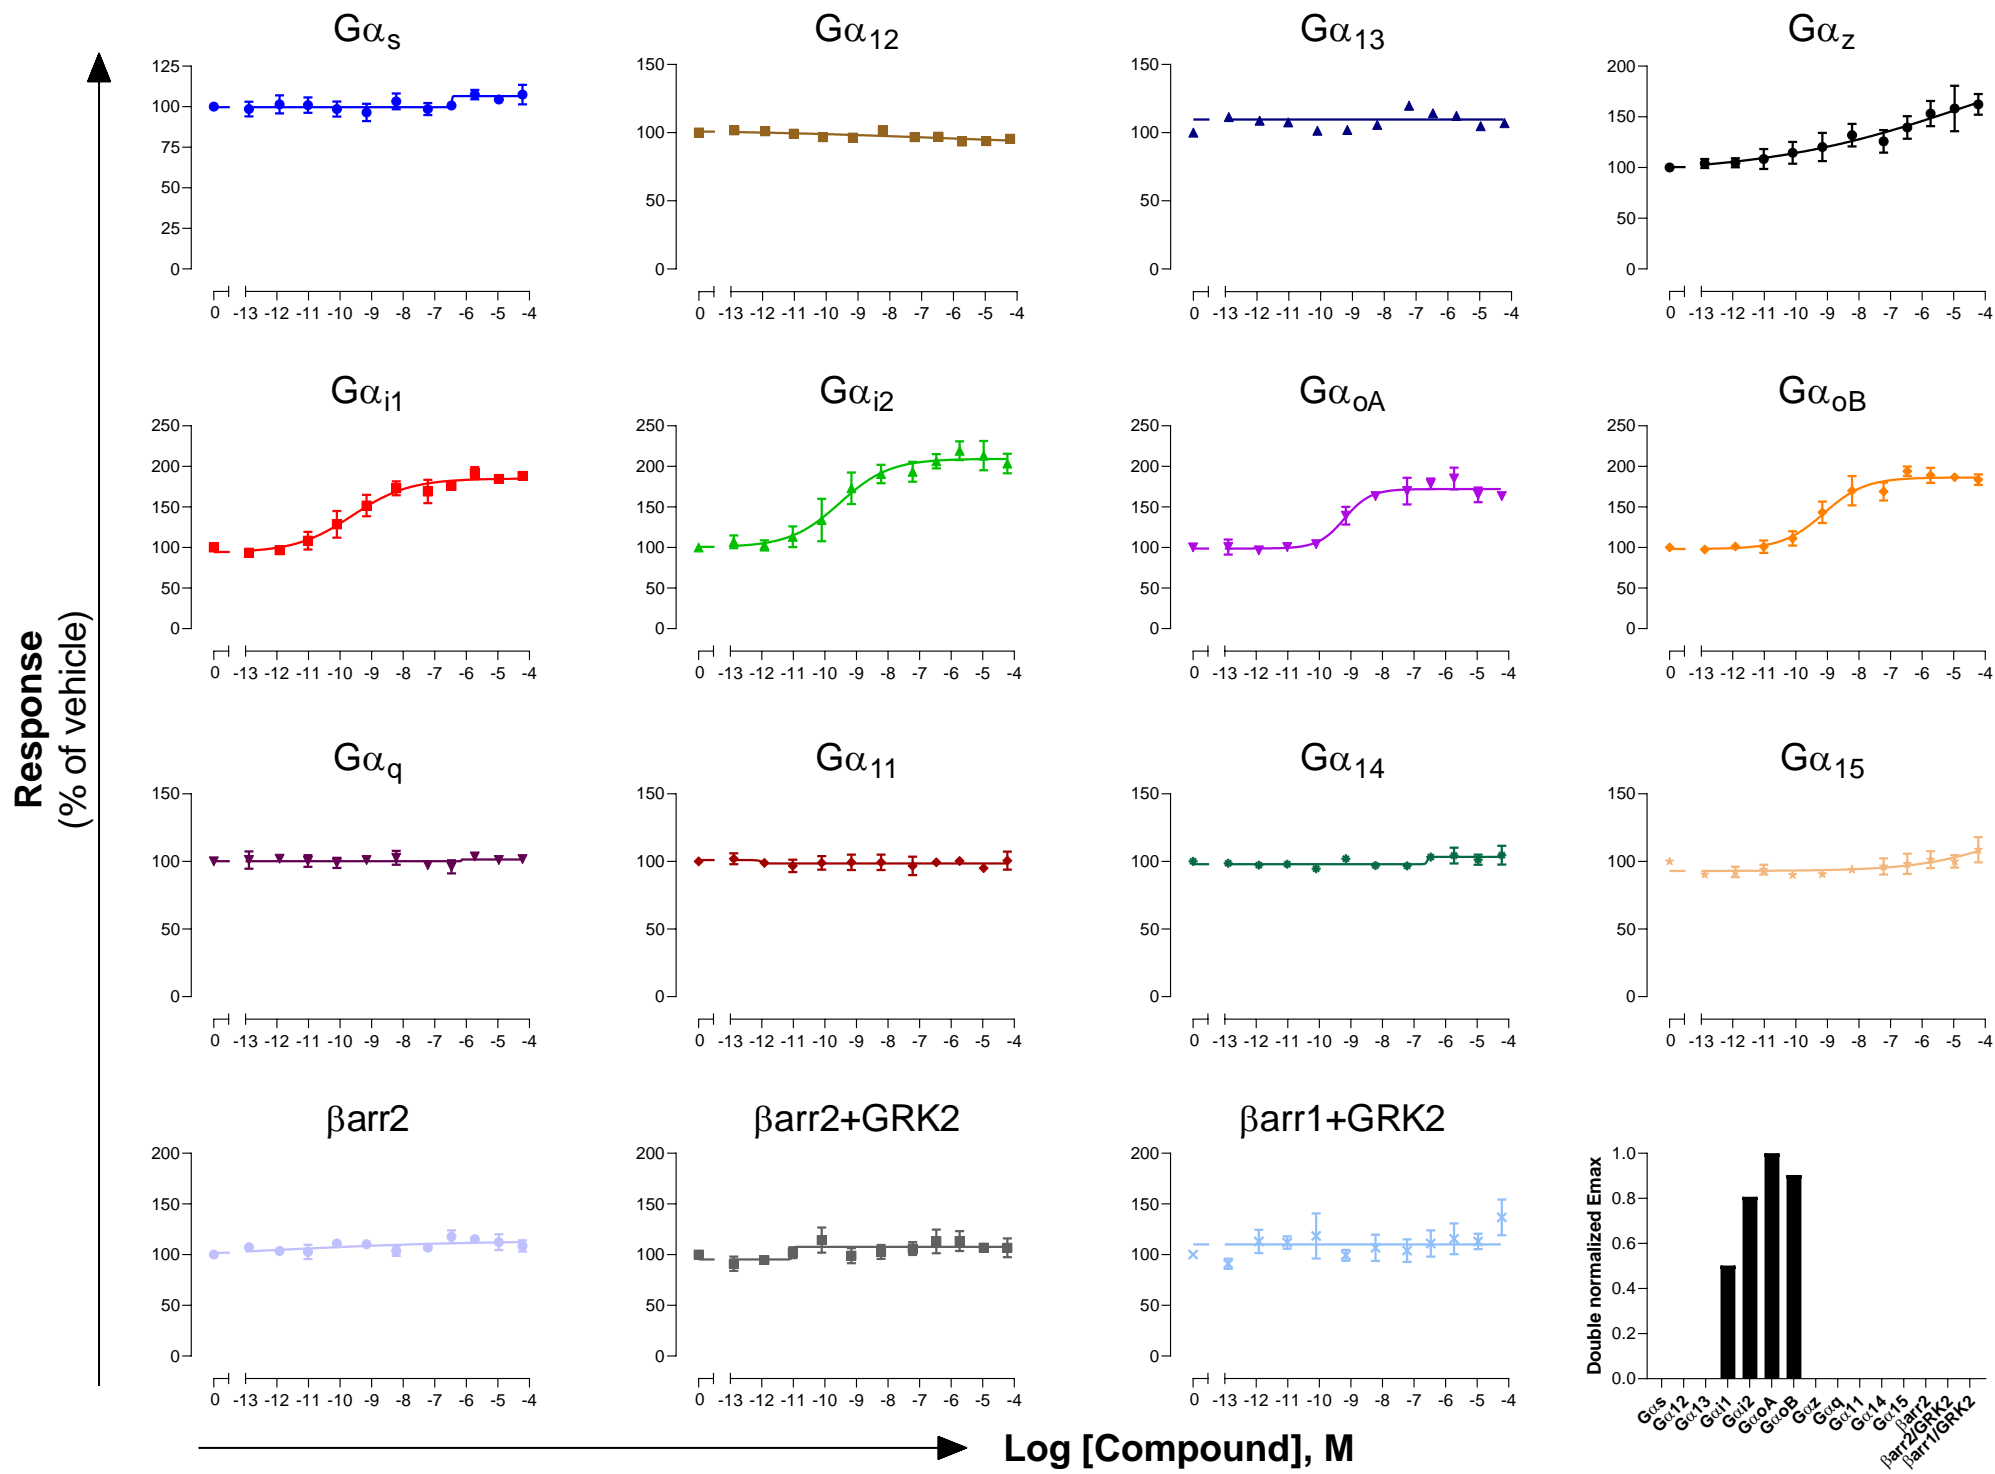

# GPCR: 5-HT<sub>2A</sub>

Ligand: Serotonin

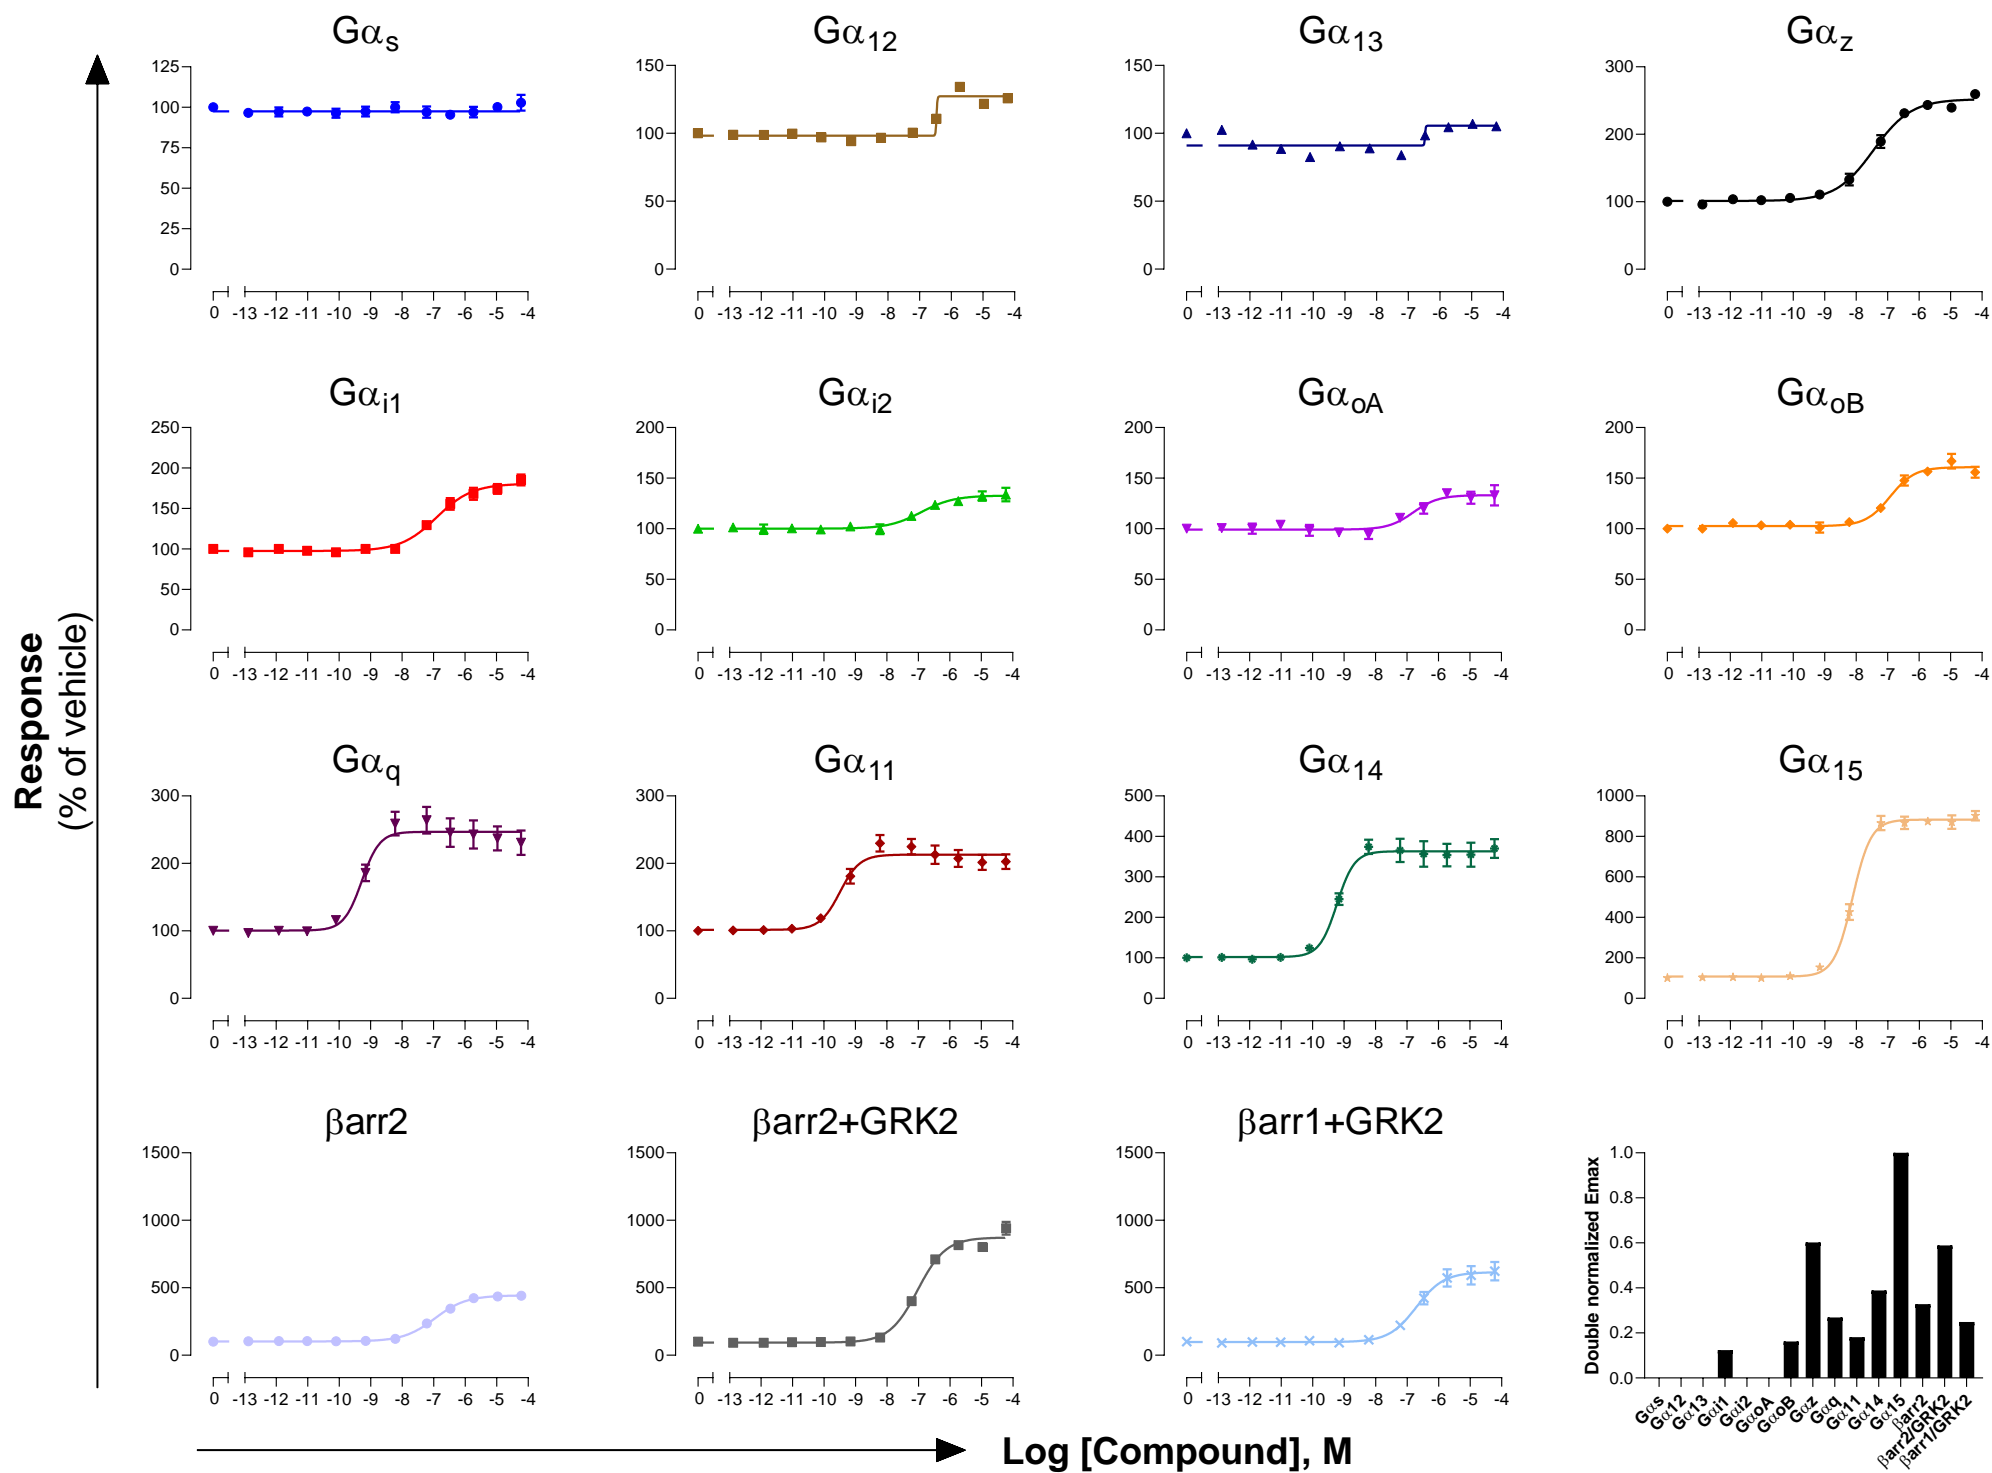

# GPCR: 5-HT<sub>2B</sub>

Ligand: Serotonin

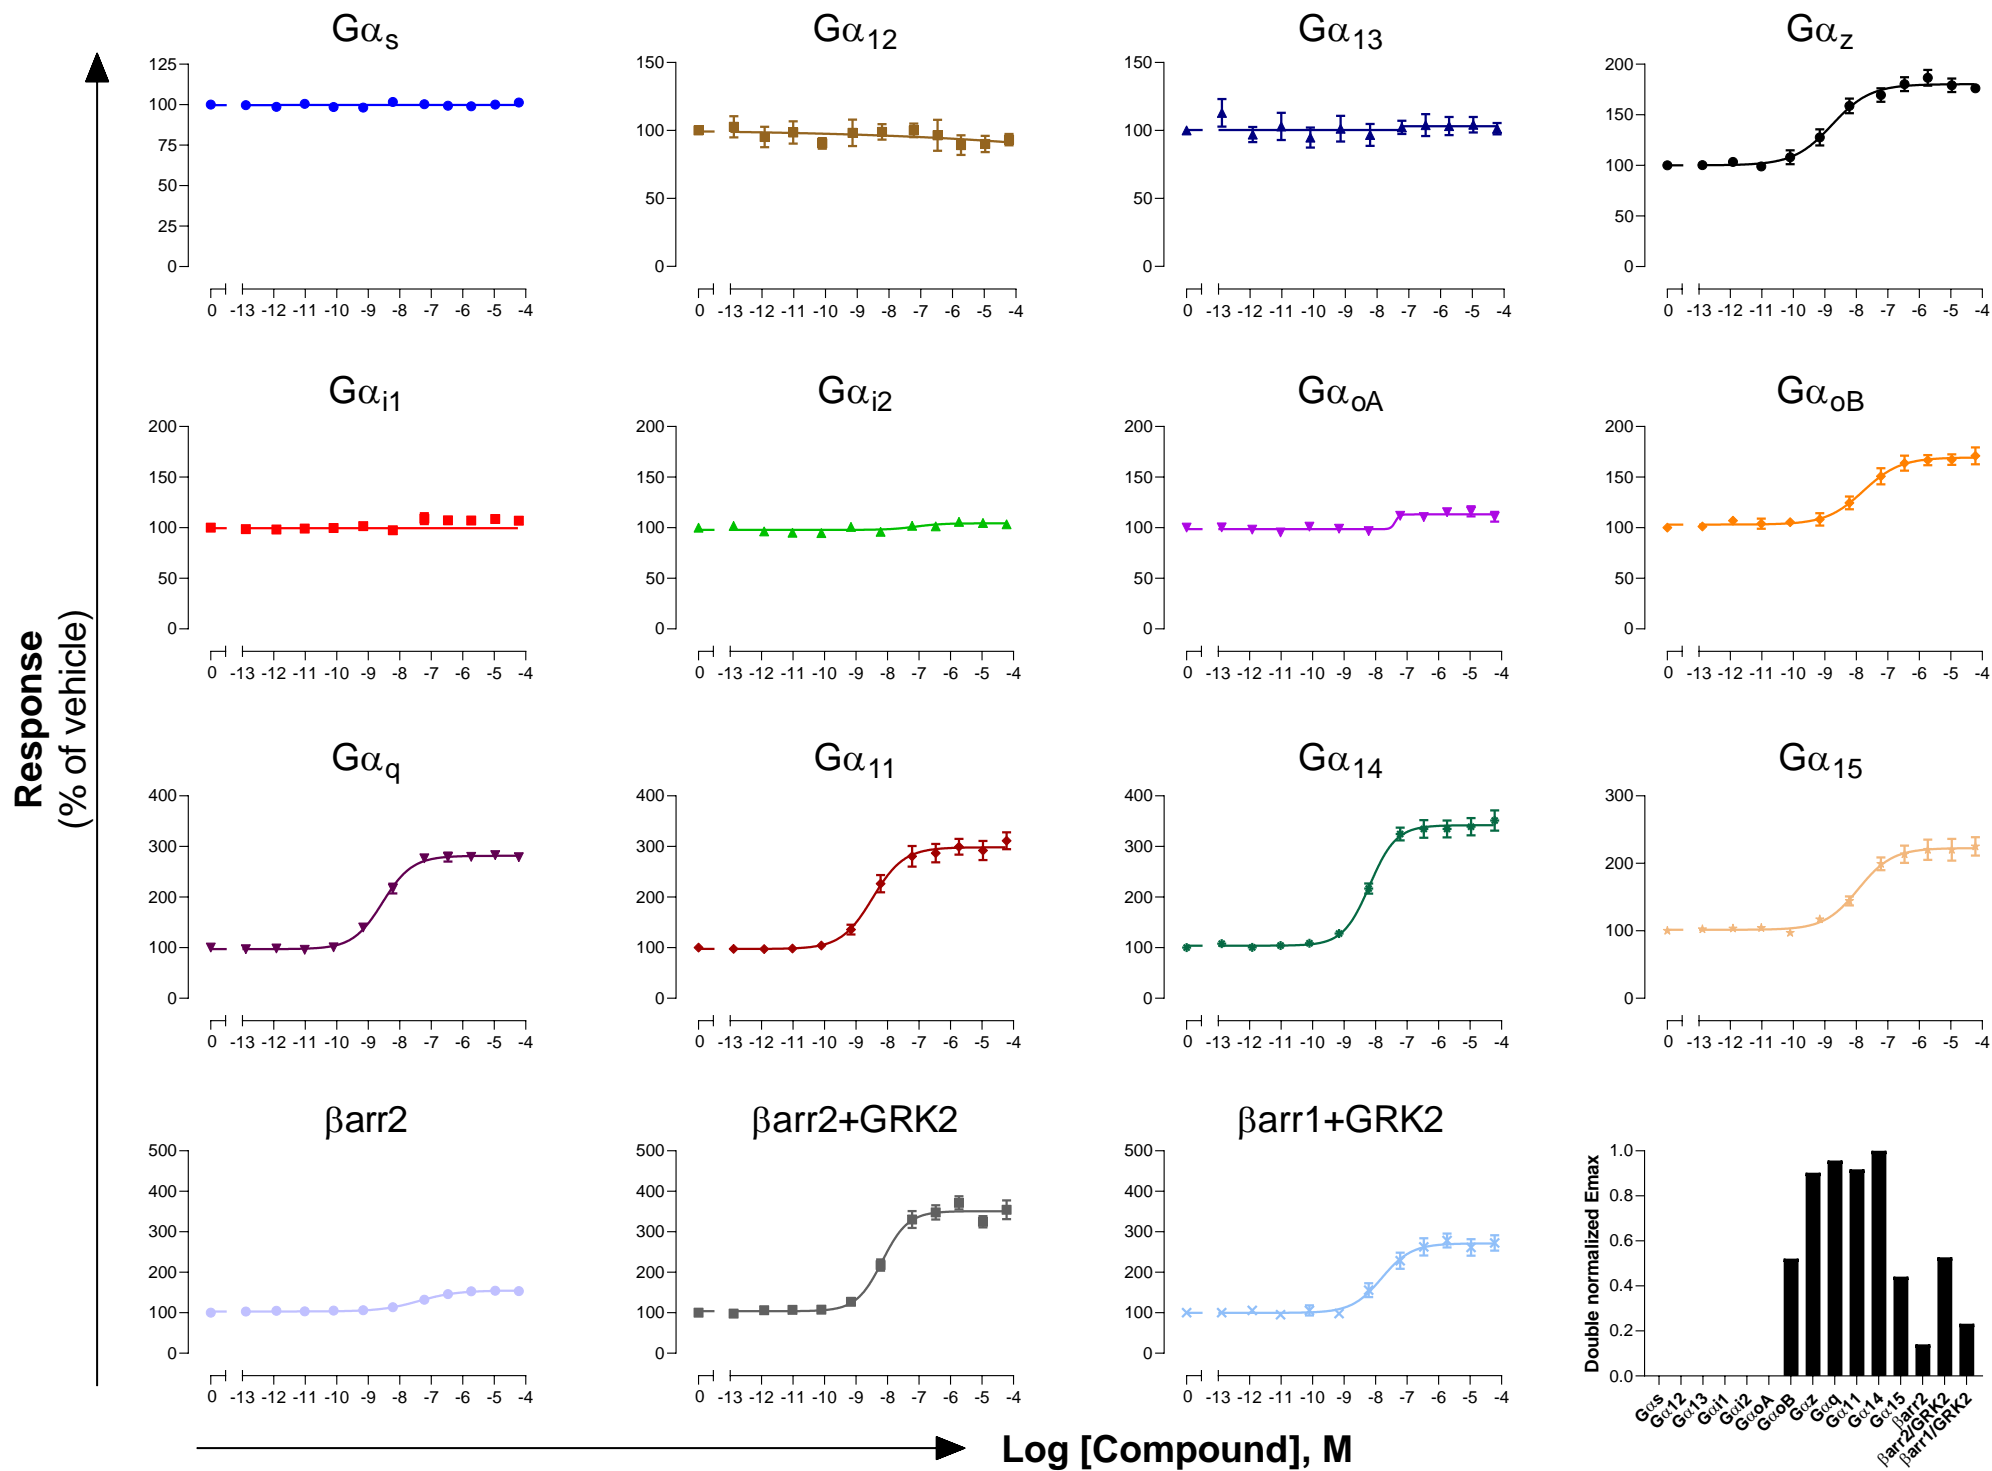

# GPCR: 5-HT<sub>2C</sub>

Ligand: Serotonin

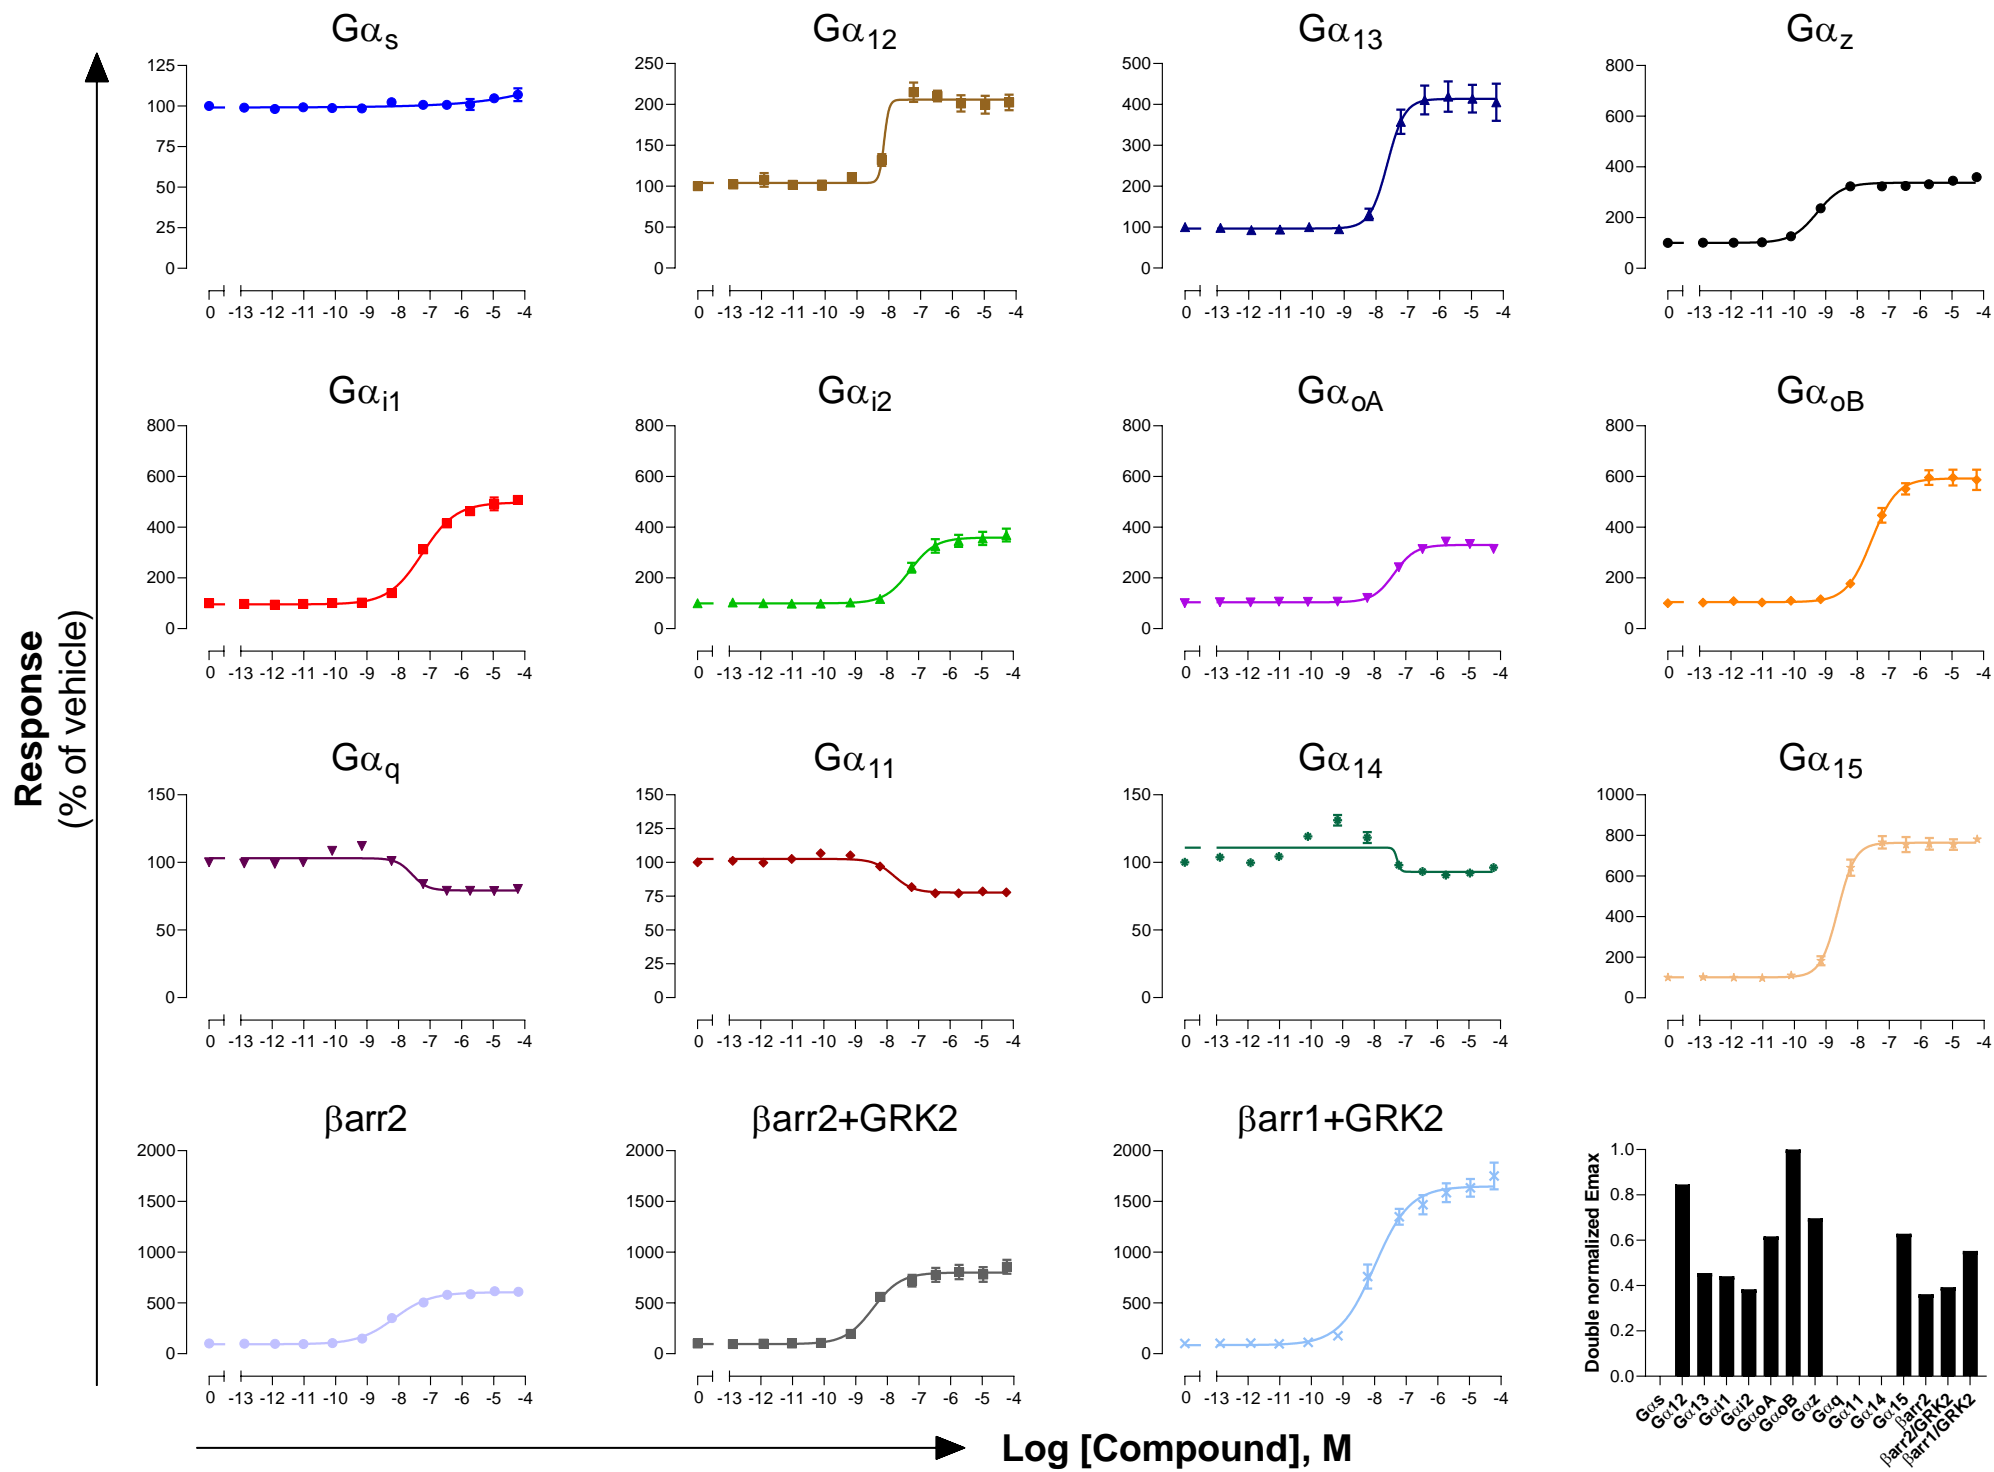

# GPCR: $\alpha_{1A}AR$

Ligand: Noradrenaline

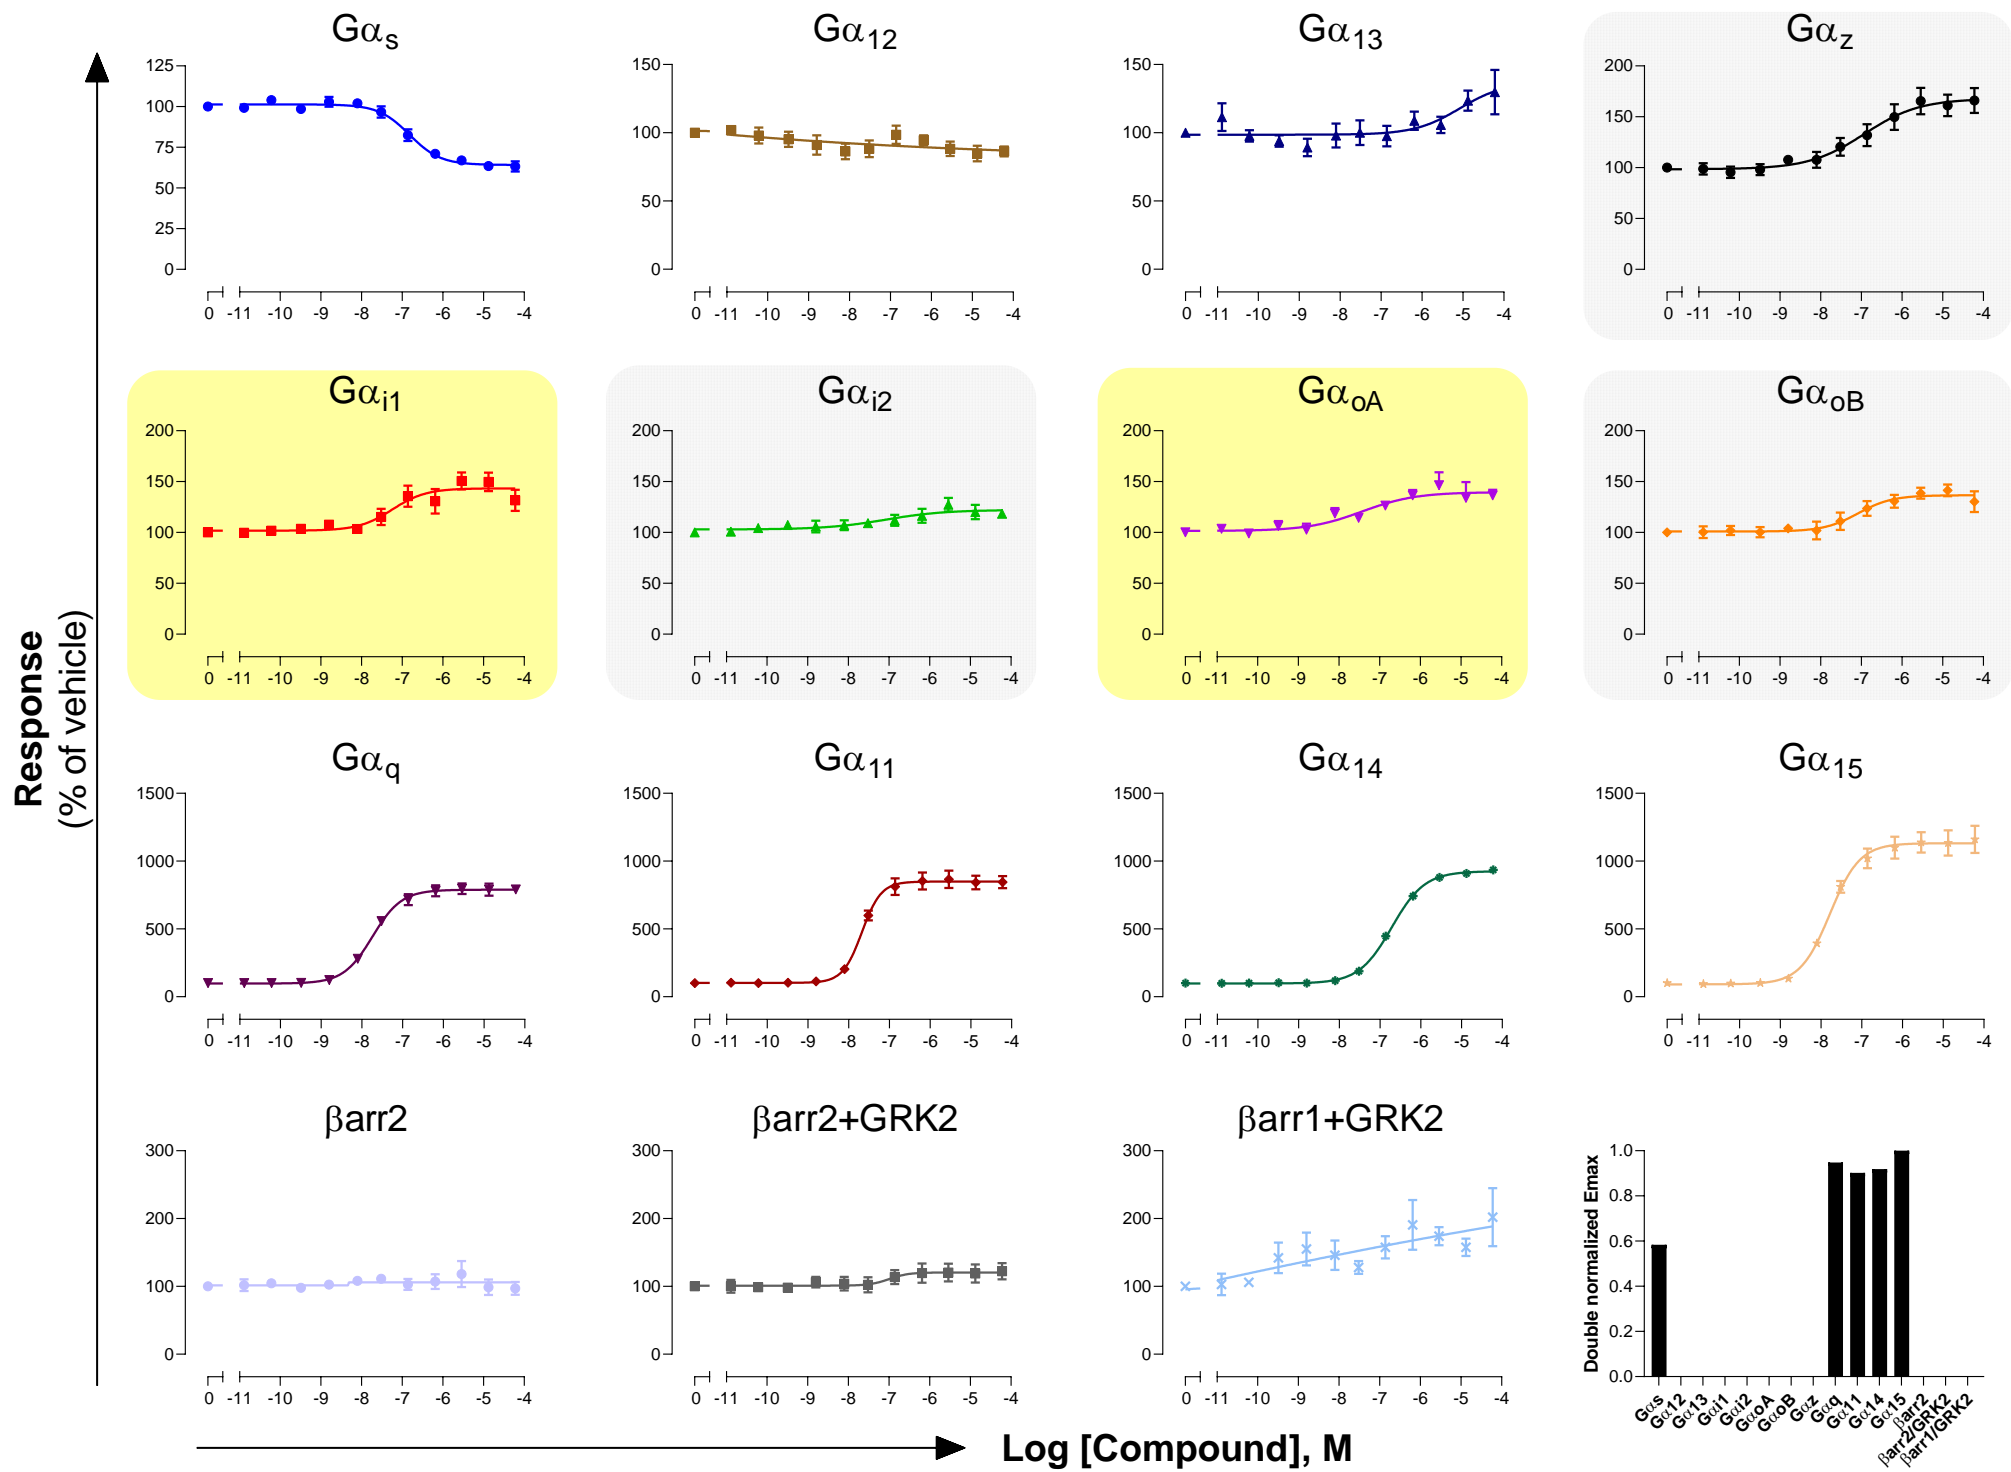

# GPCR: $\alpha_2AAR$

Ligand: Noradrenaline

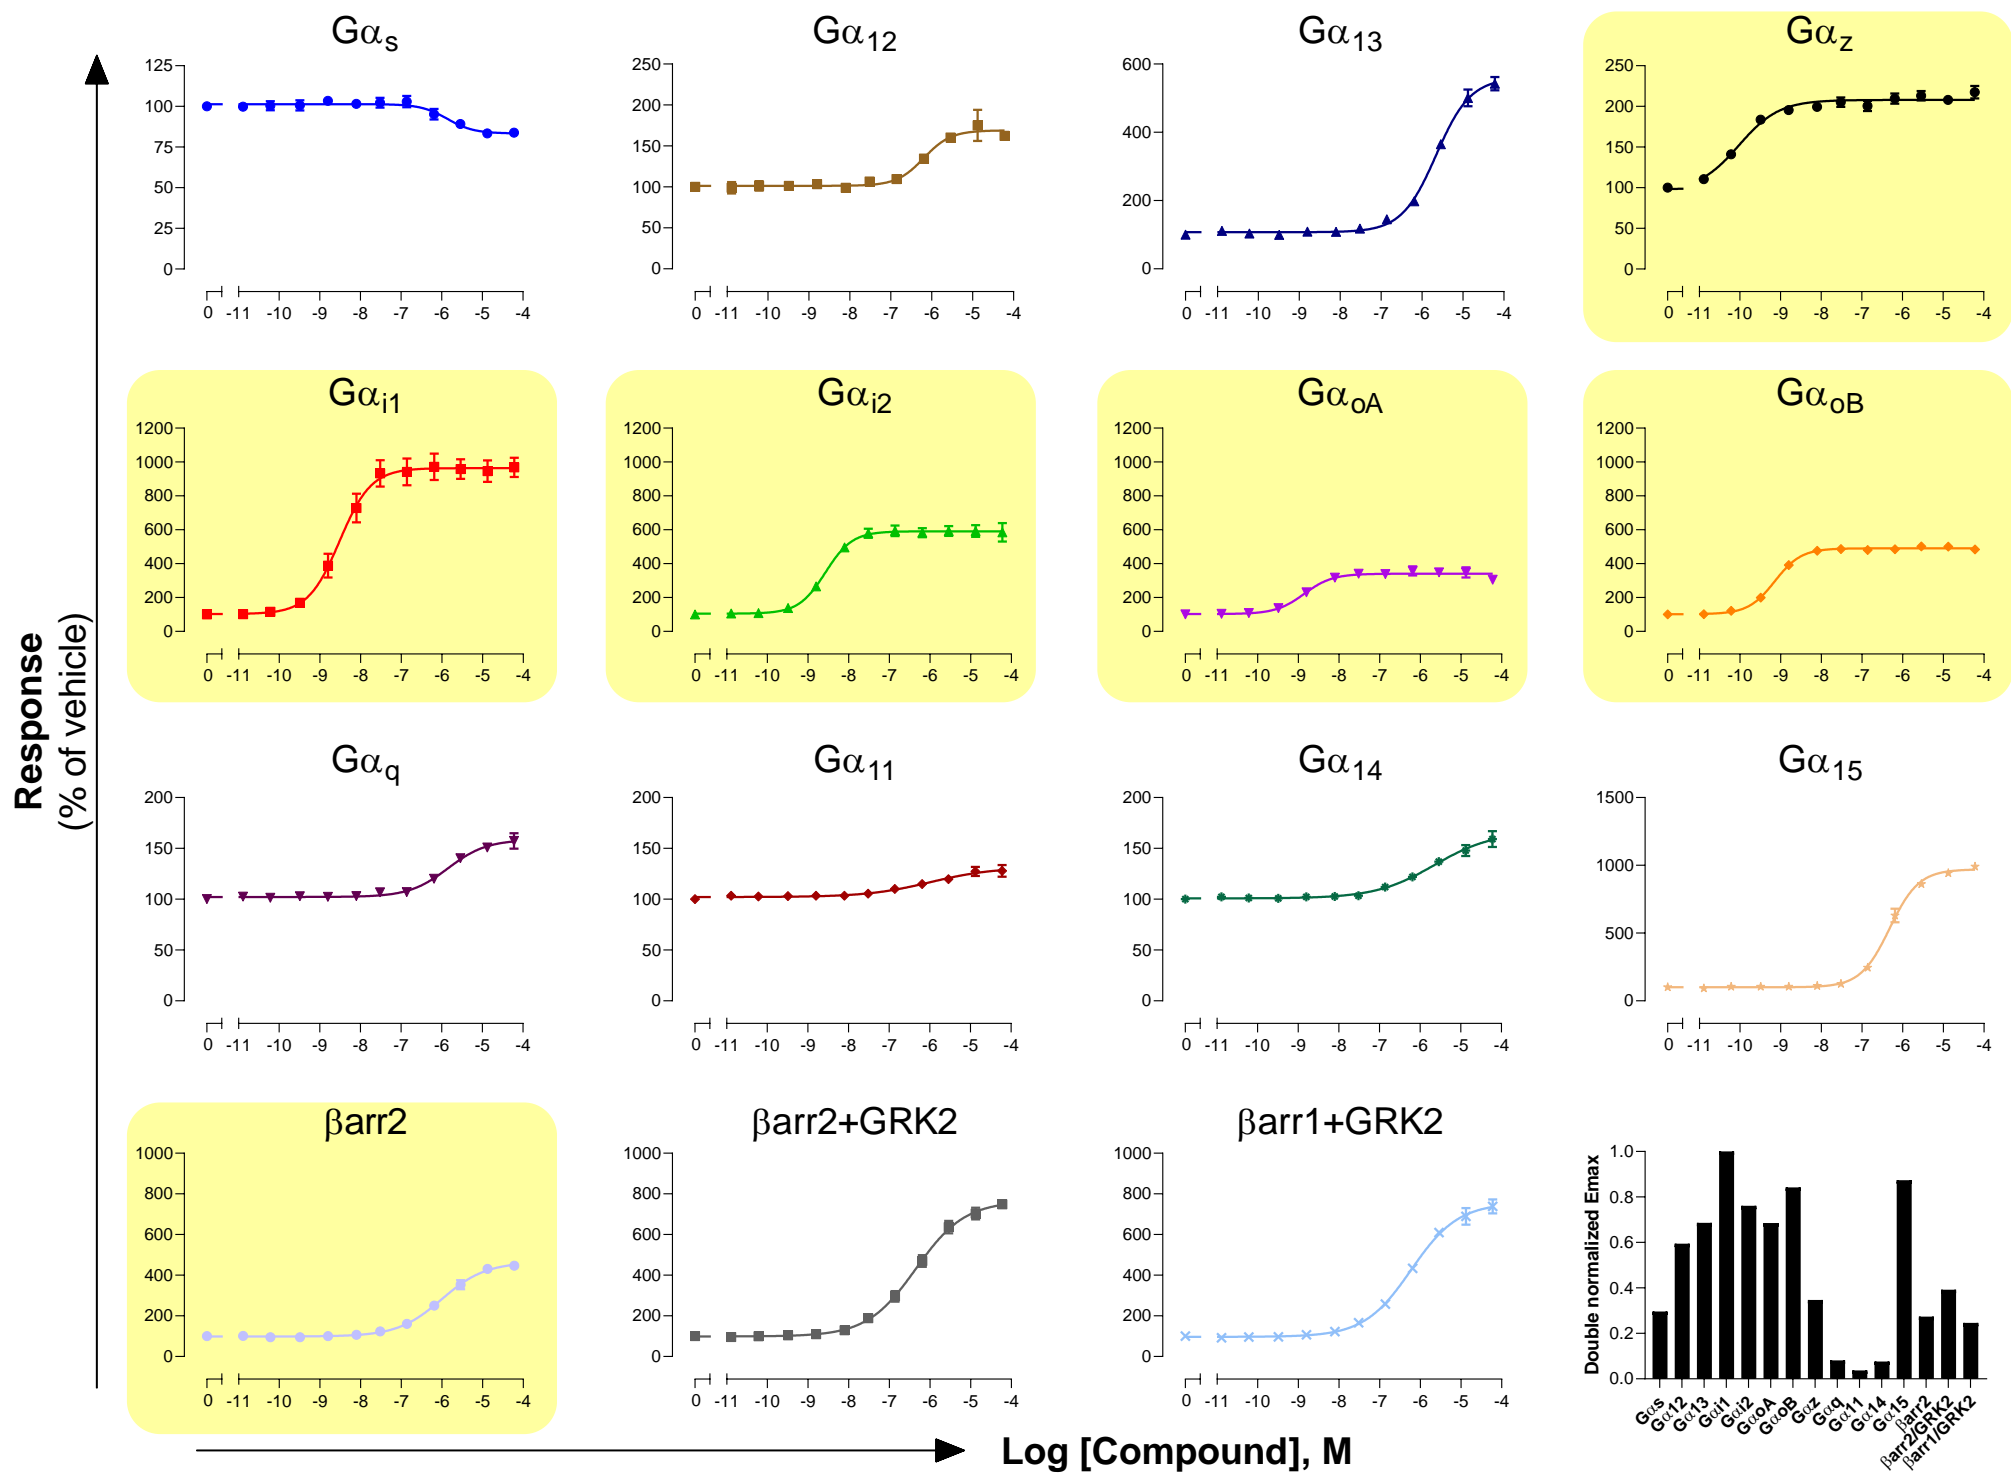



# GPCR: $\alpha_2\text{BAR}$

Ligand: Noradrenaline

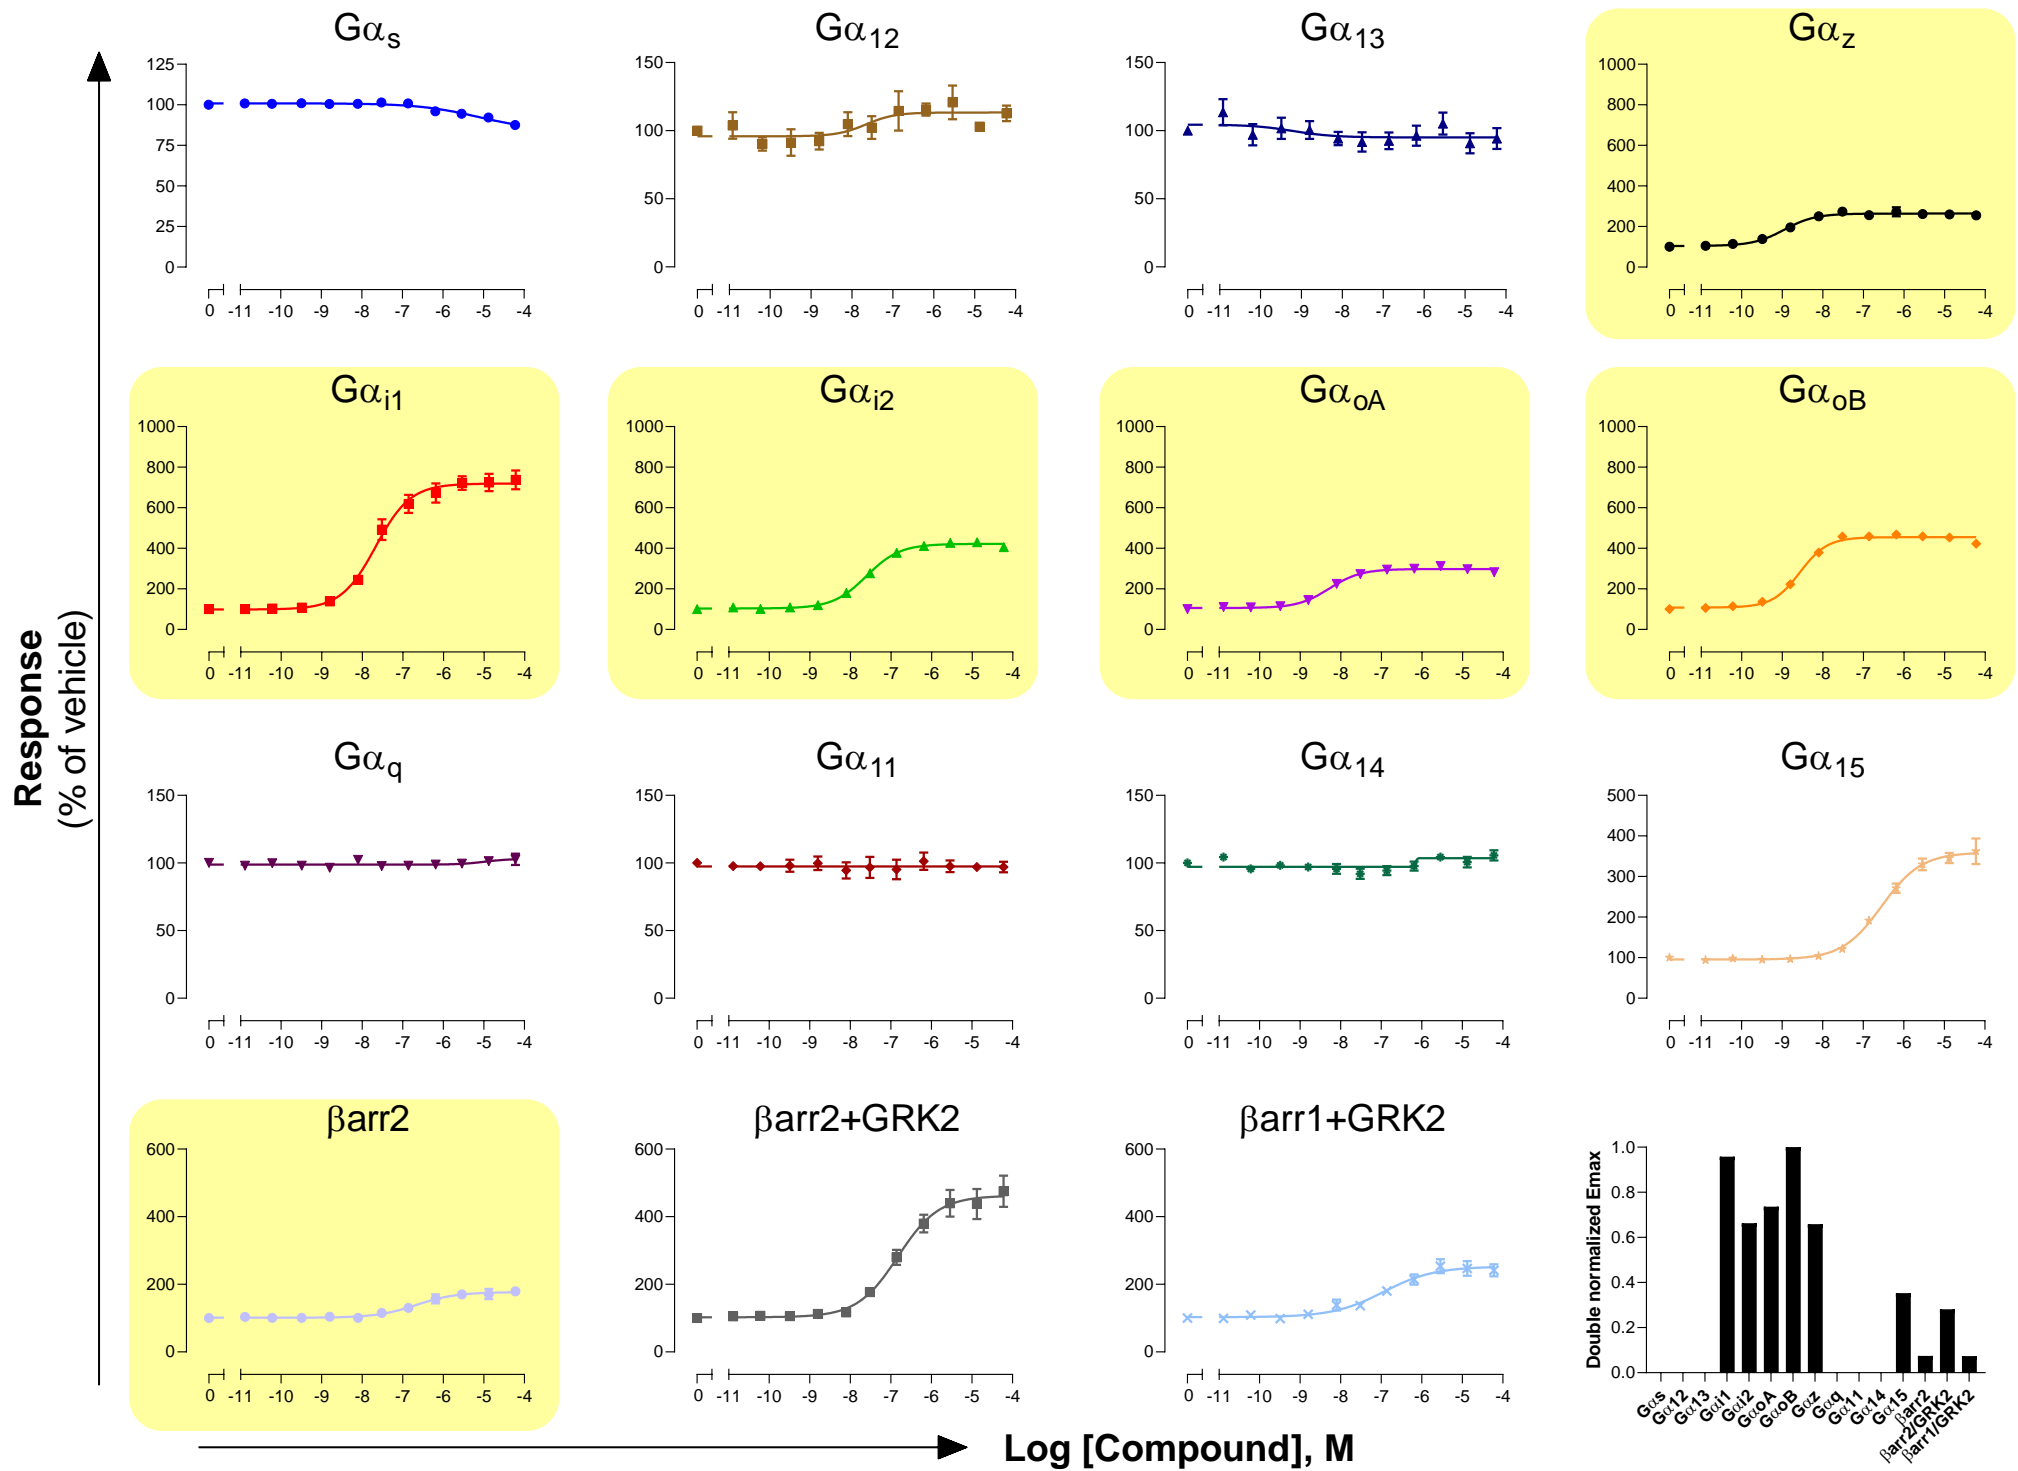

# GPCR: $\alpha_2\text{C}\text{AR}$

Ligand: Noradrenaline

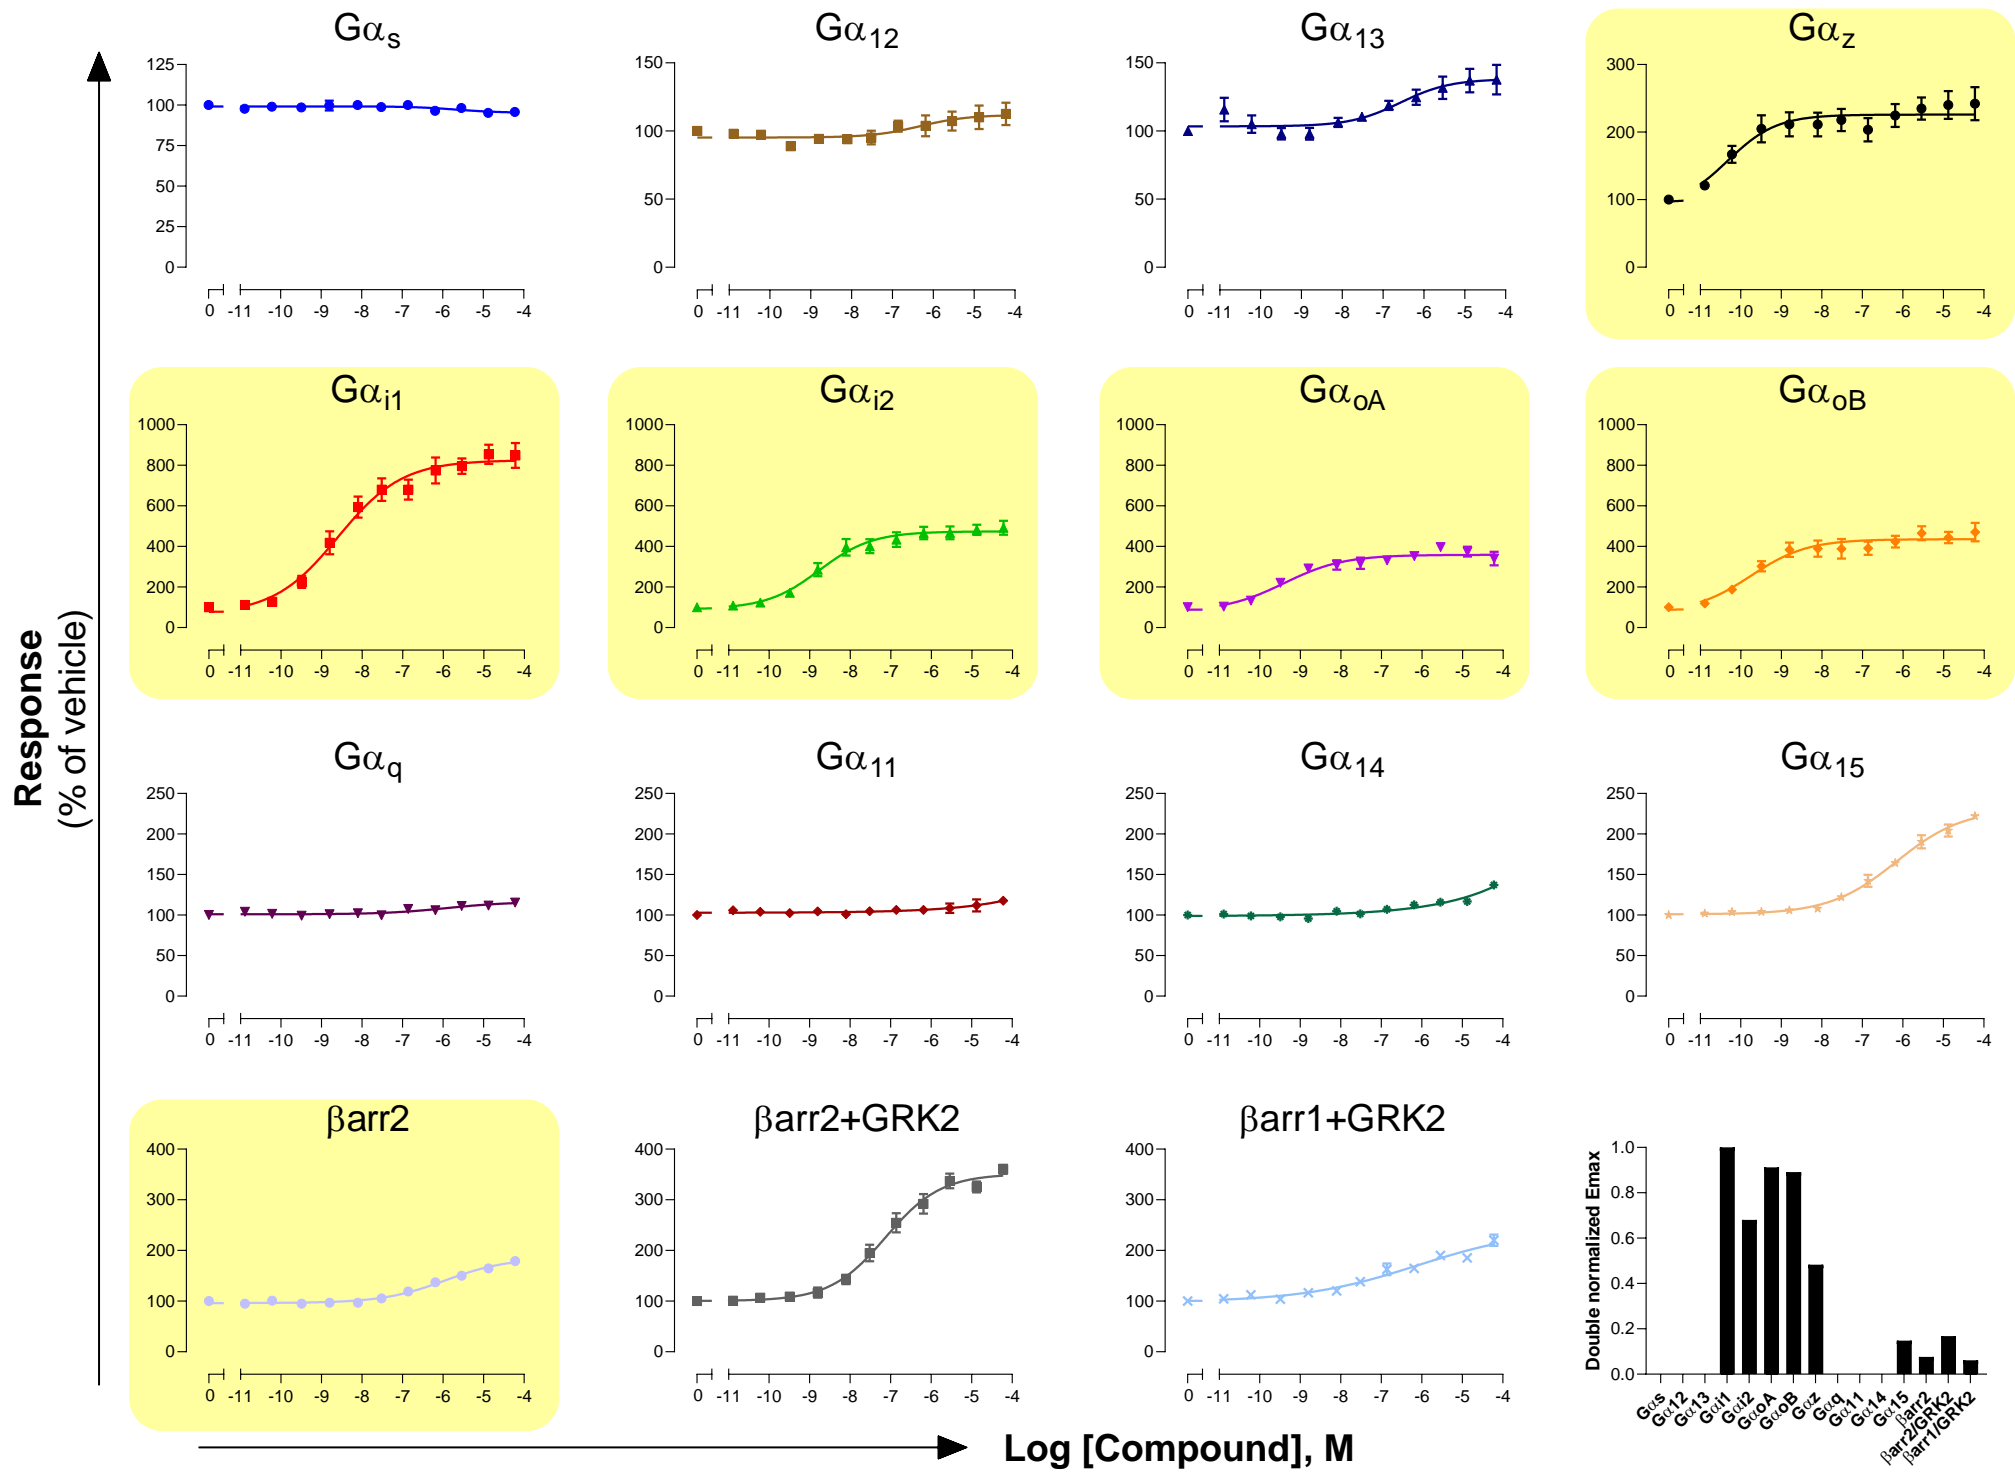

# GPCR: $\beta_1$ AR

Ligand: Noradrenaline

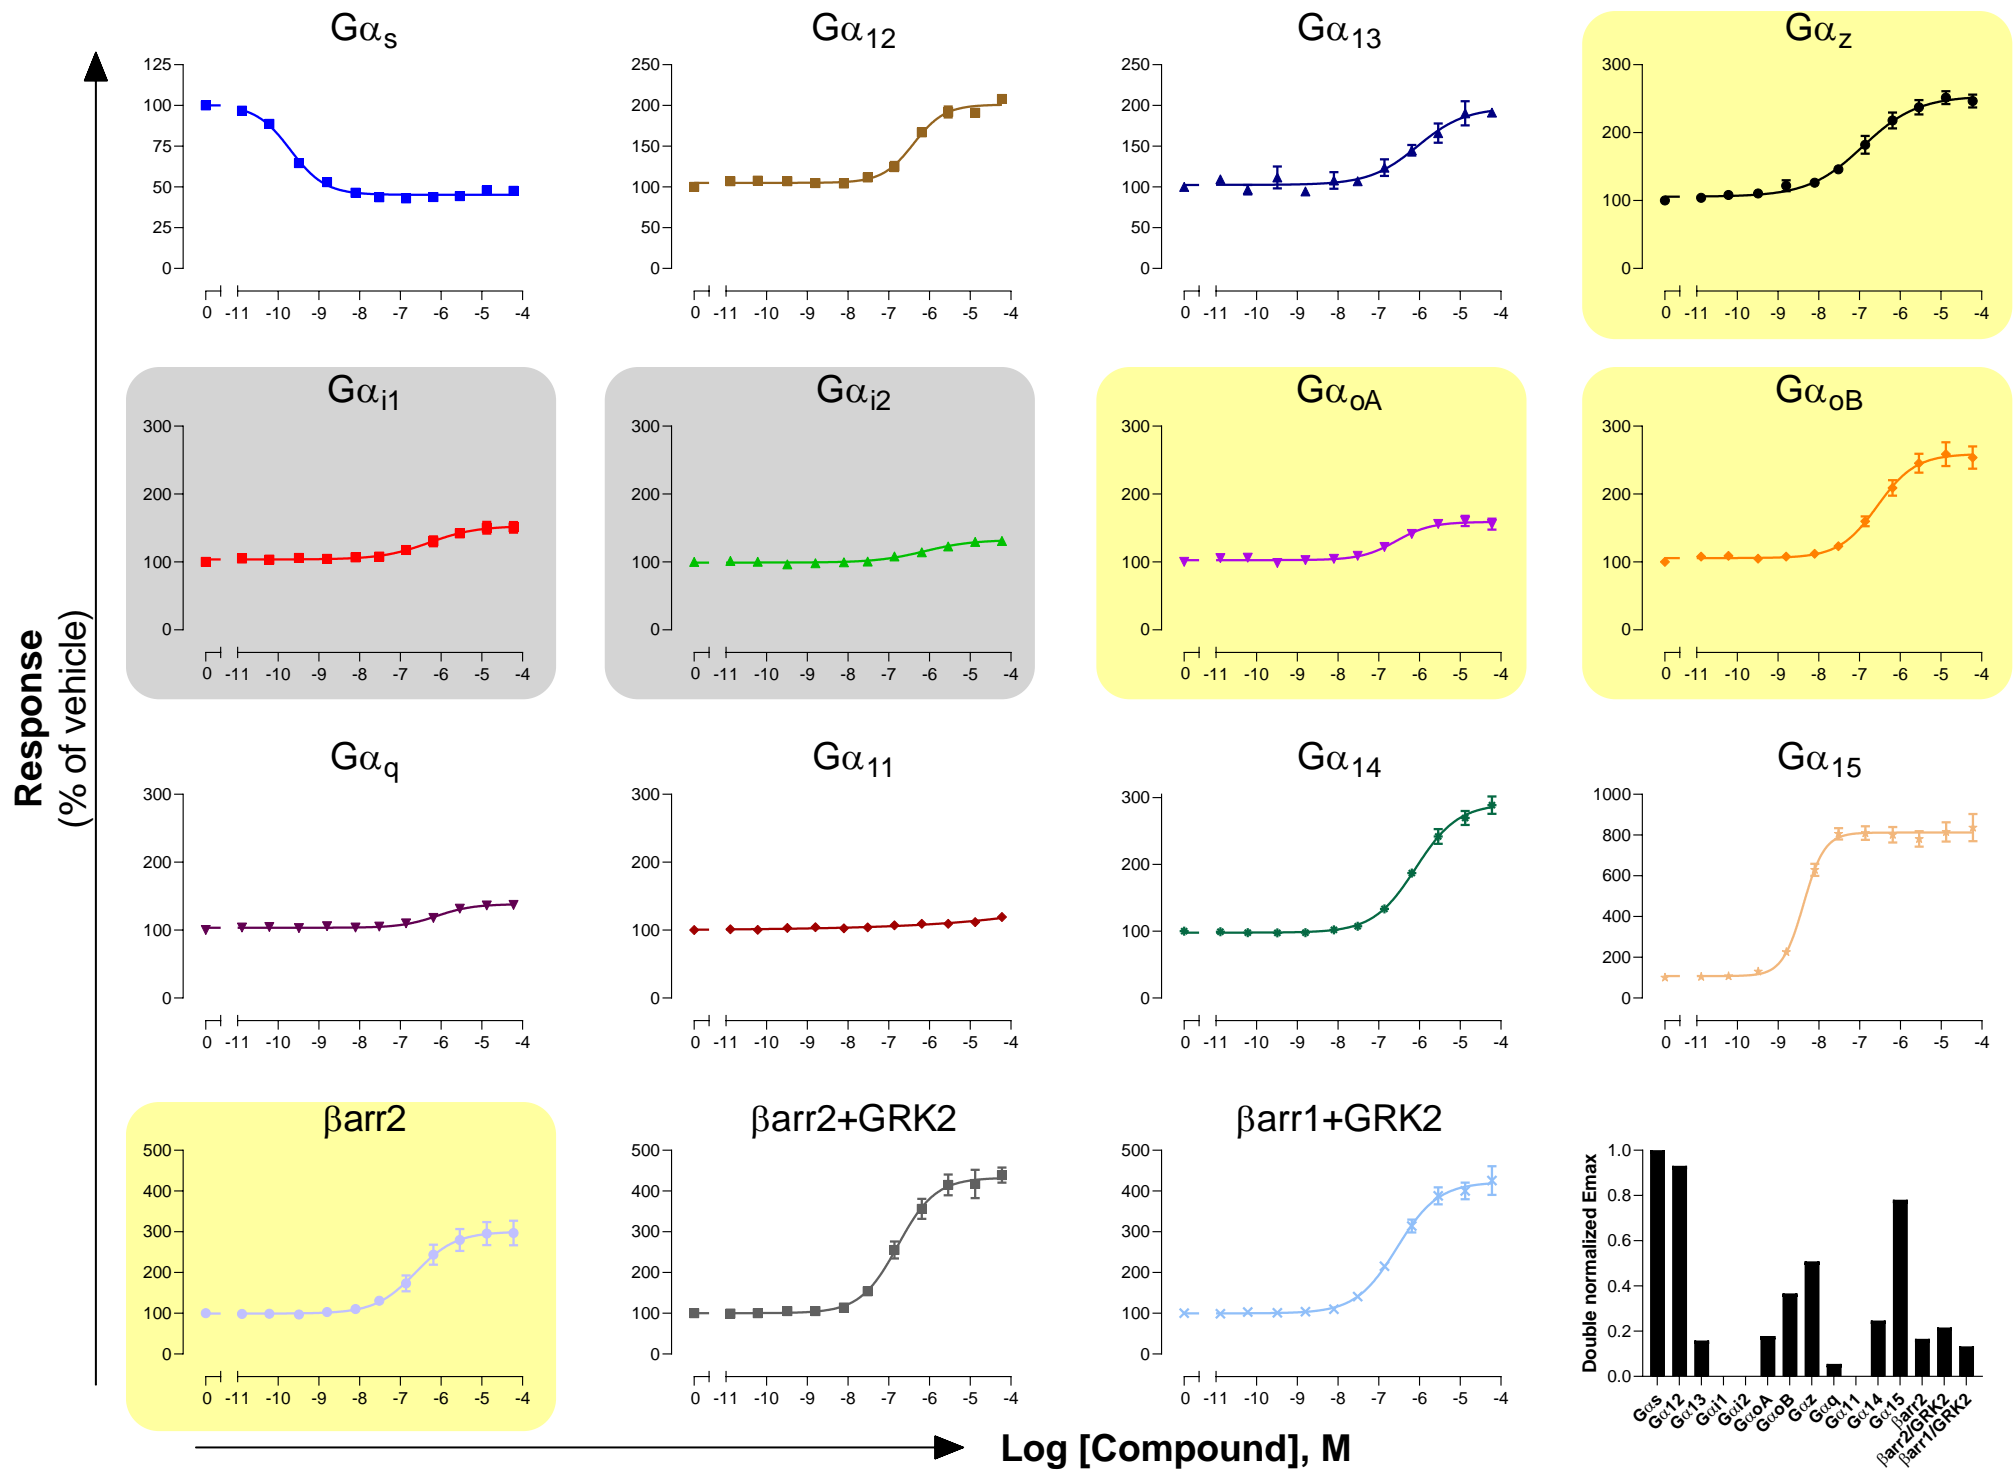

# GPCR: $\beta_2$ AR

Ligand: Noradrenaline

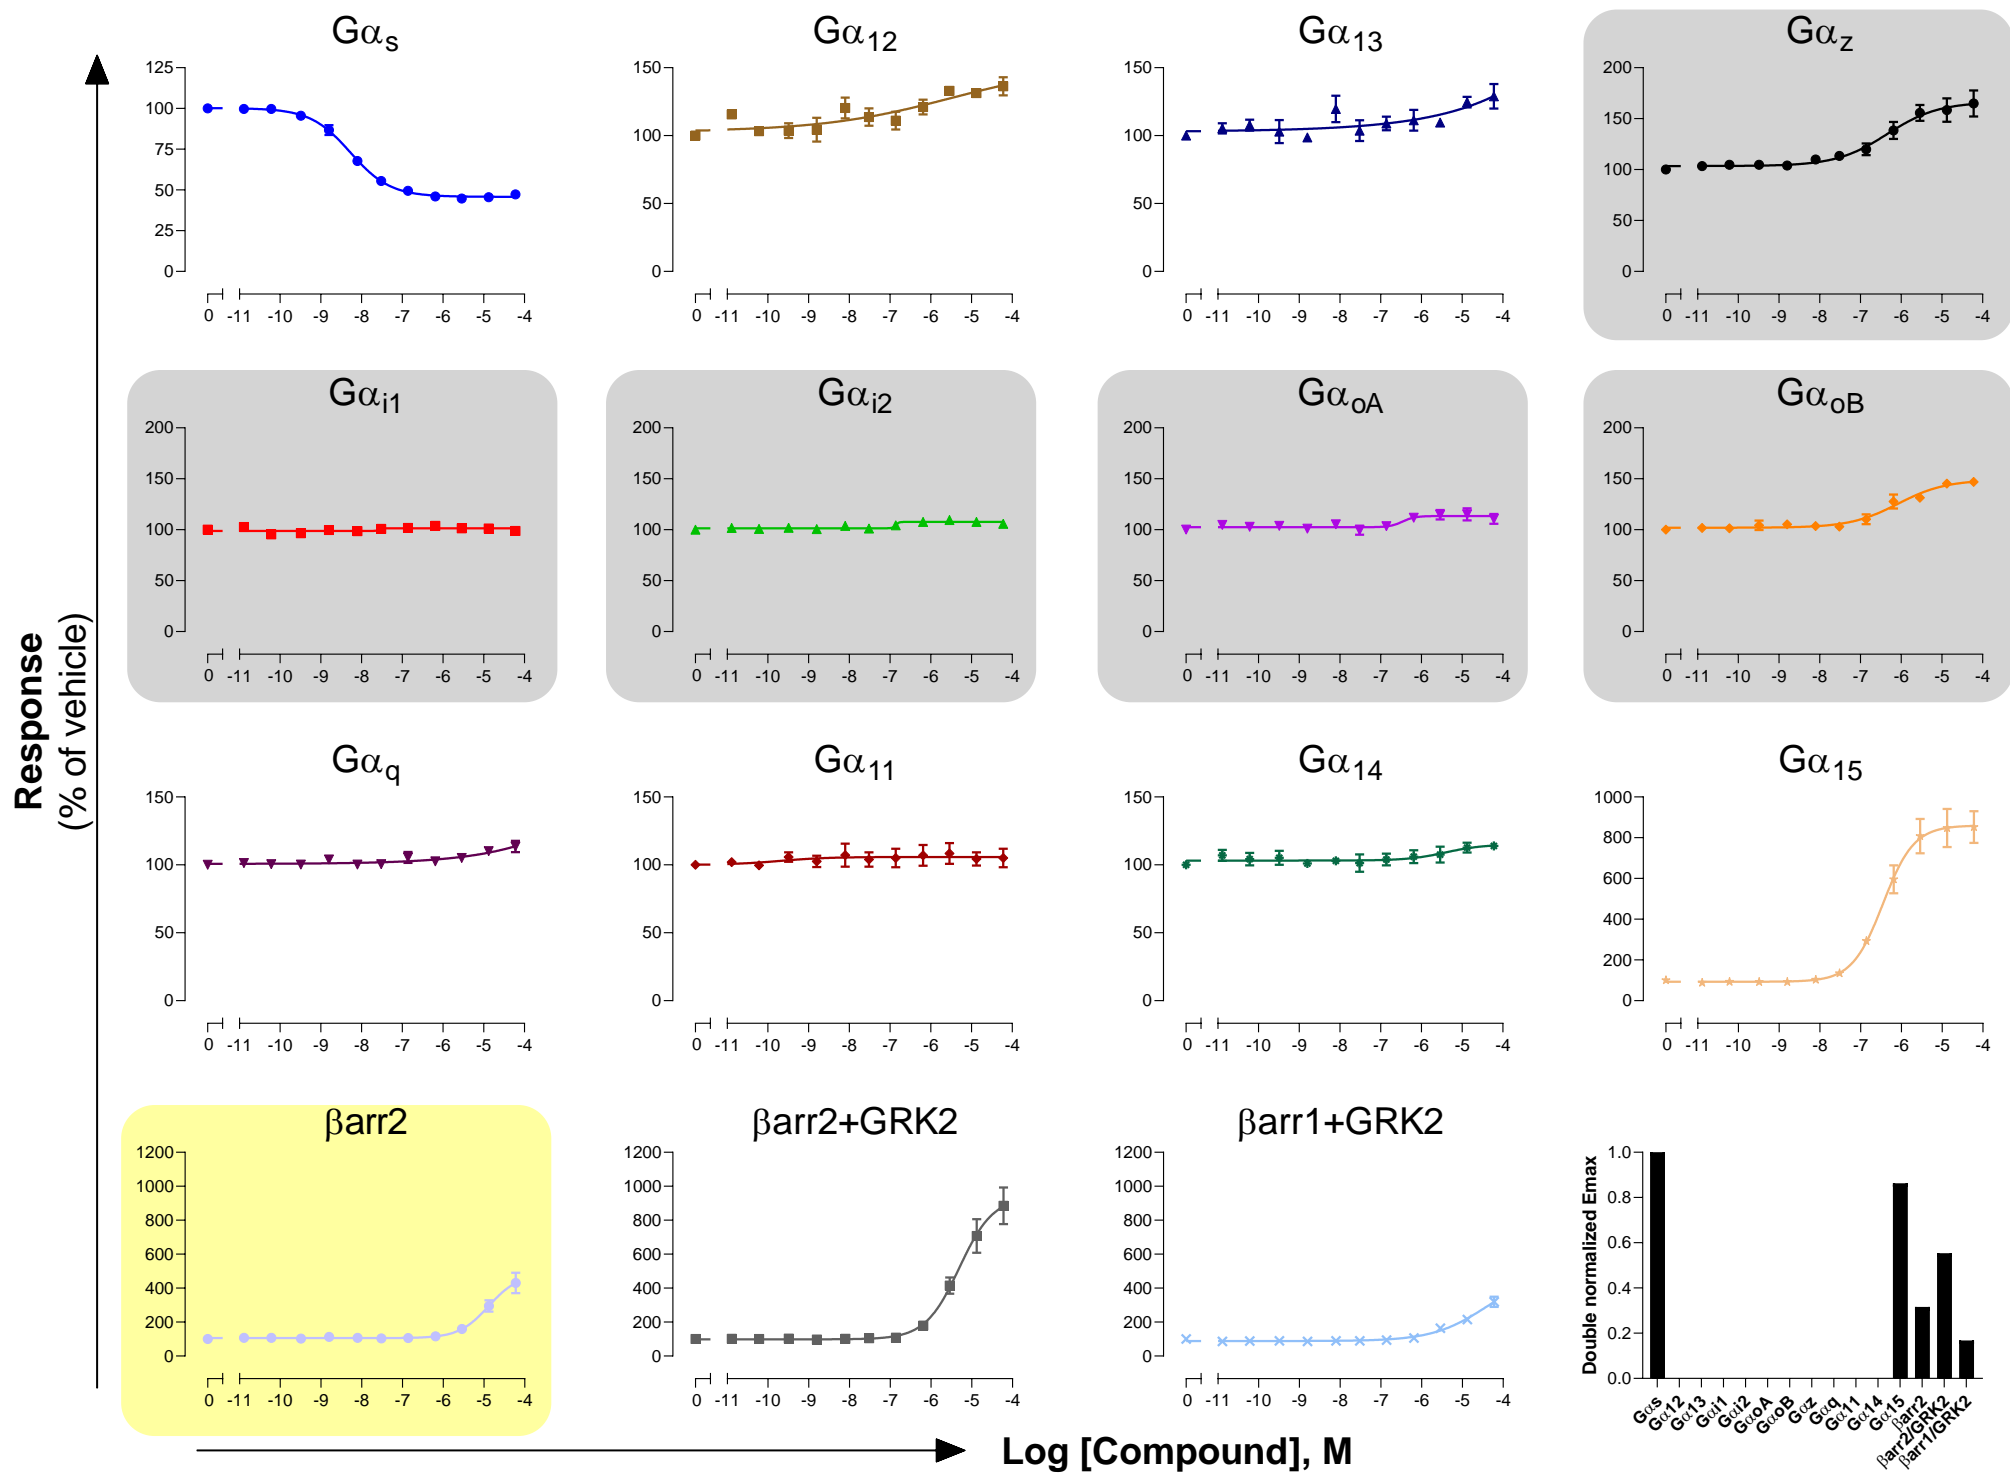

# GPCR: A<sub>1</sub>

## Ligand: Adenosine

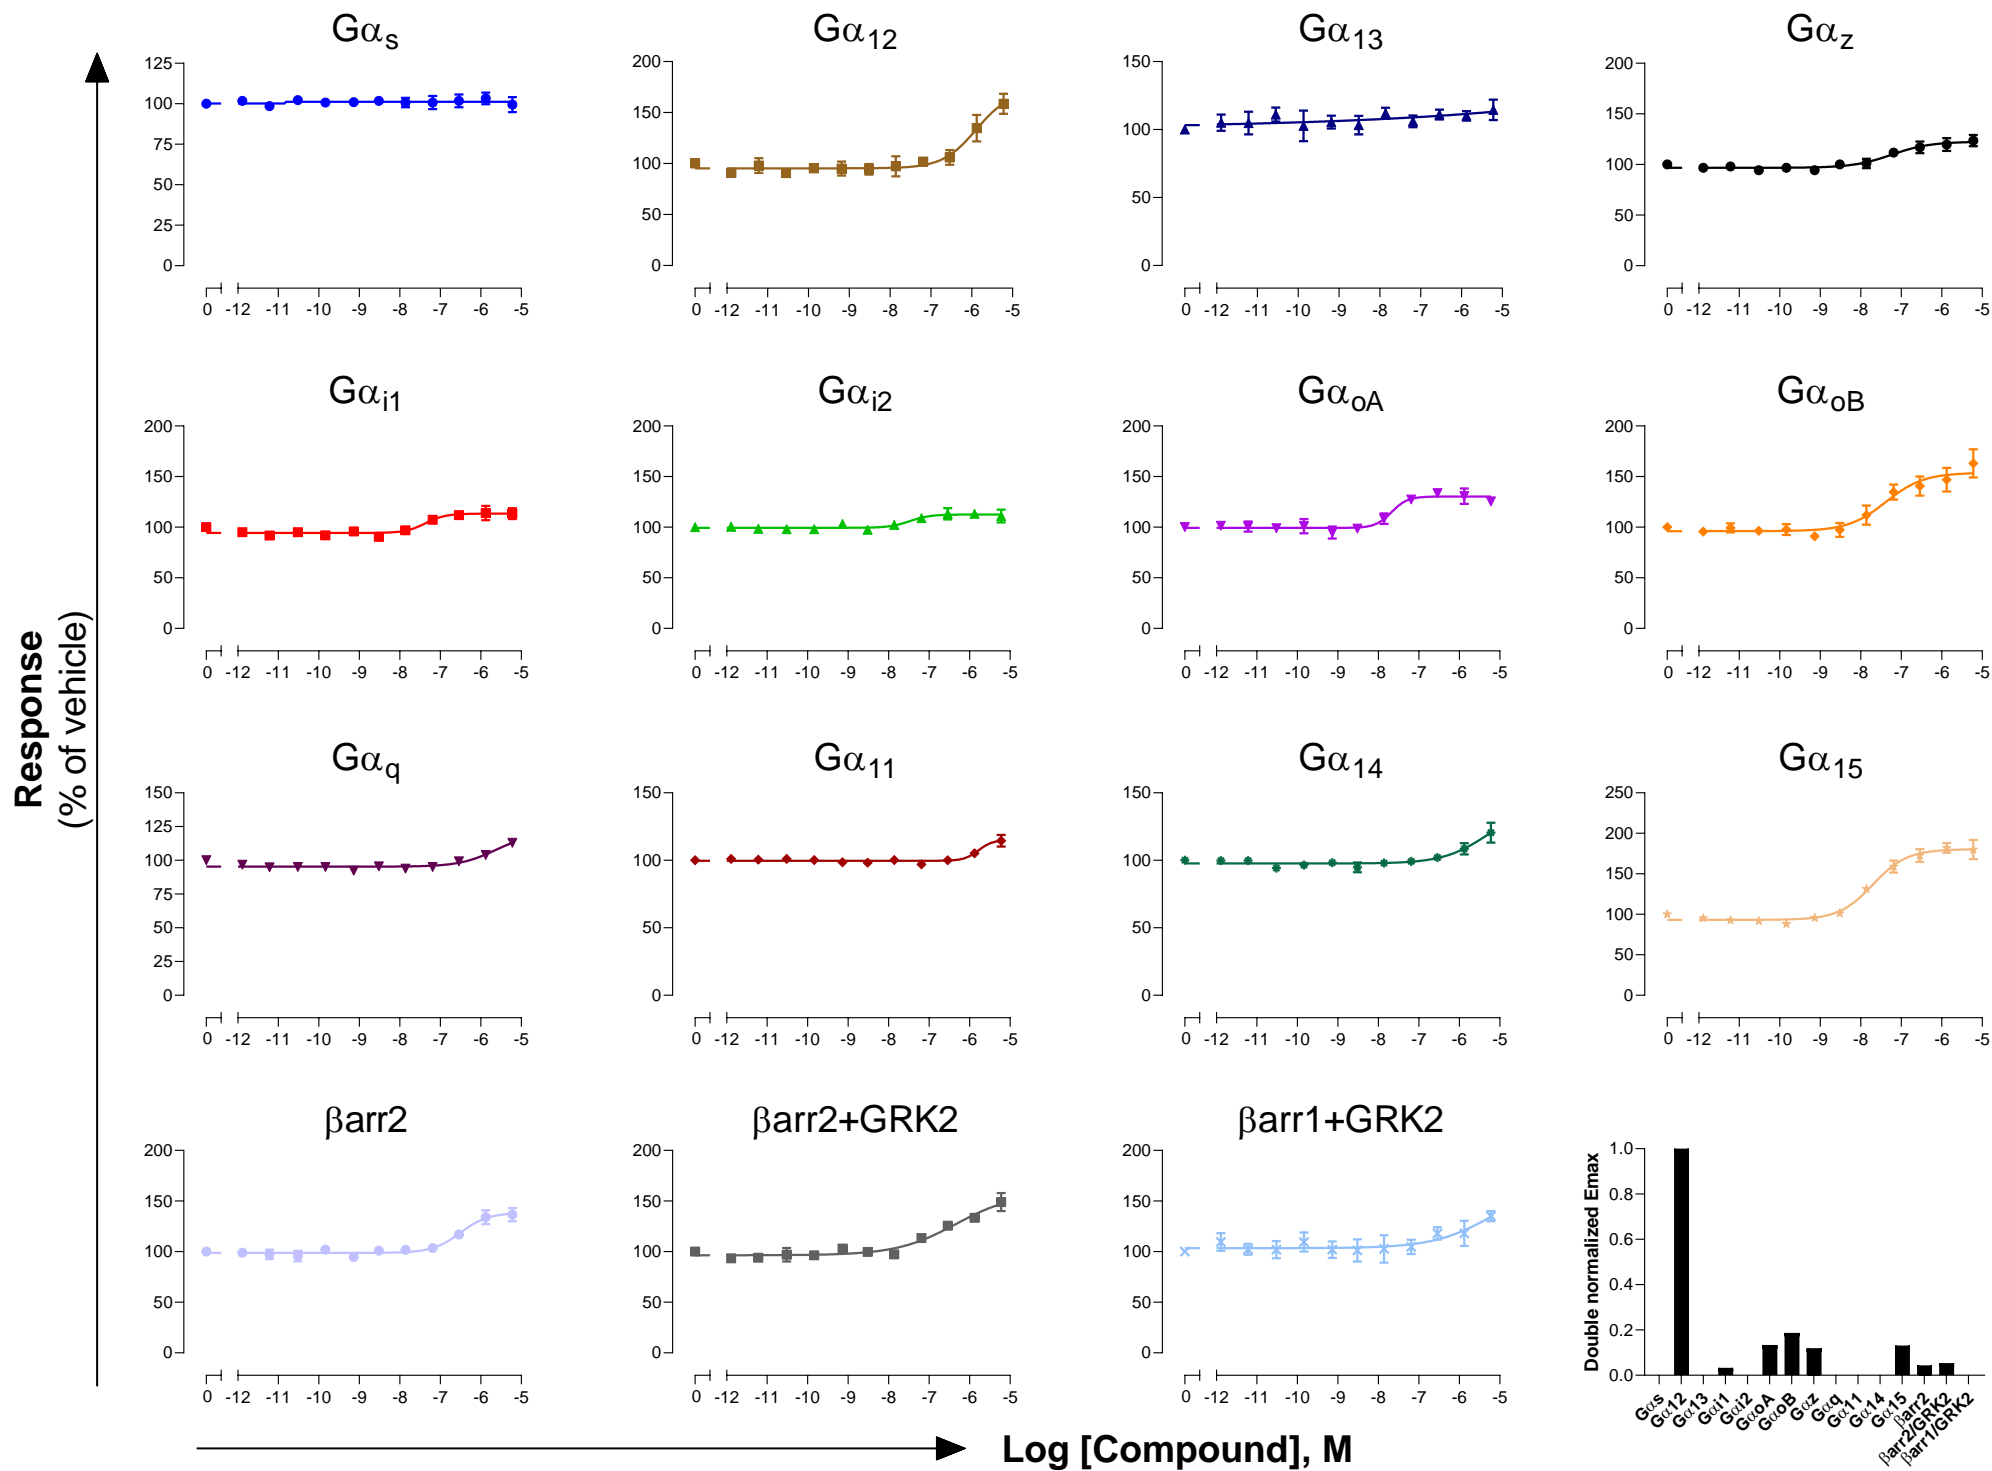

# GPCR: A<sub>2A</sub>

Ligand: Adenosine

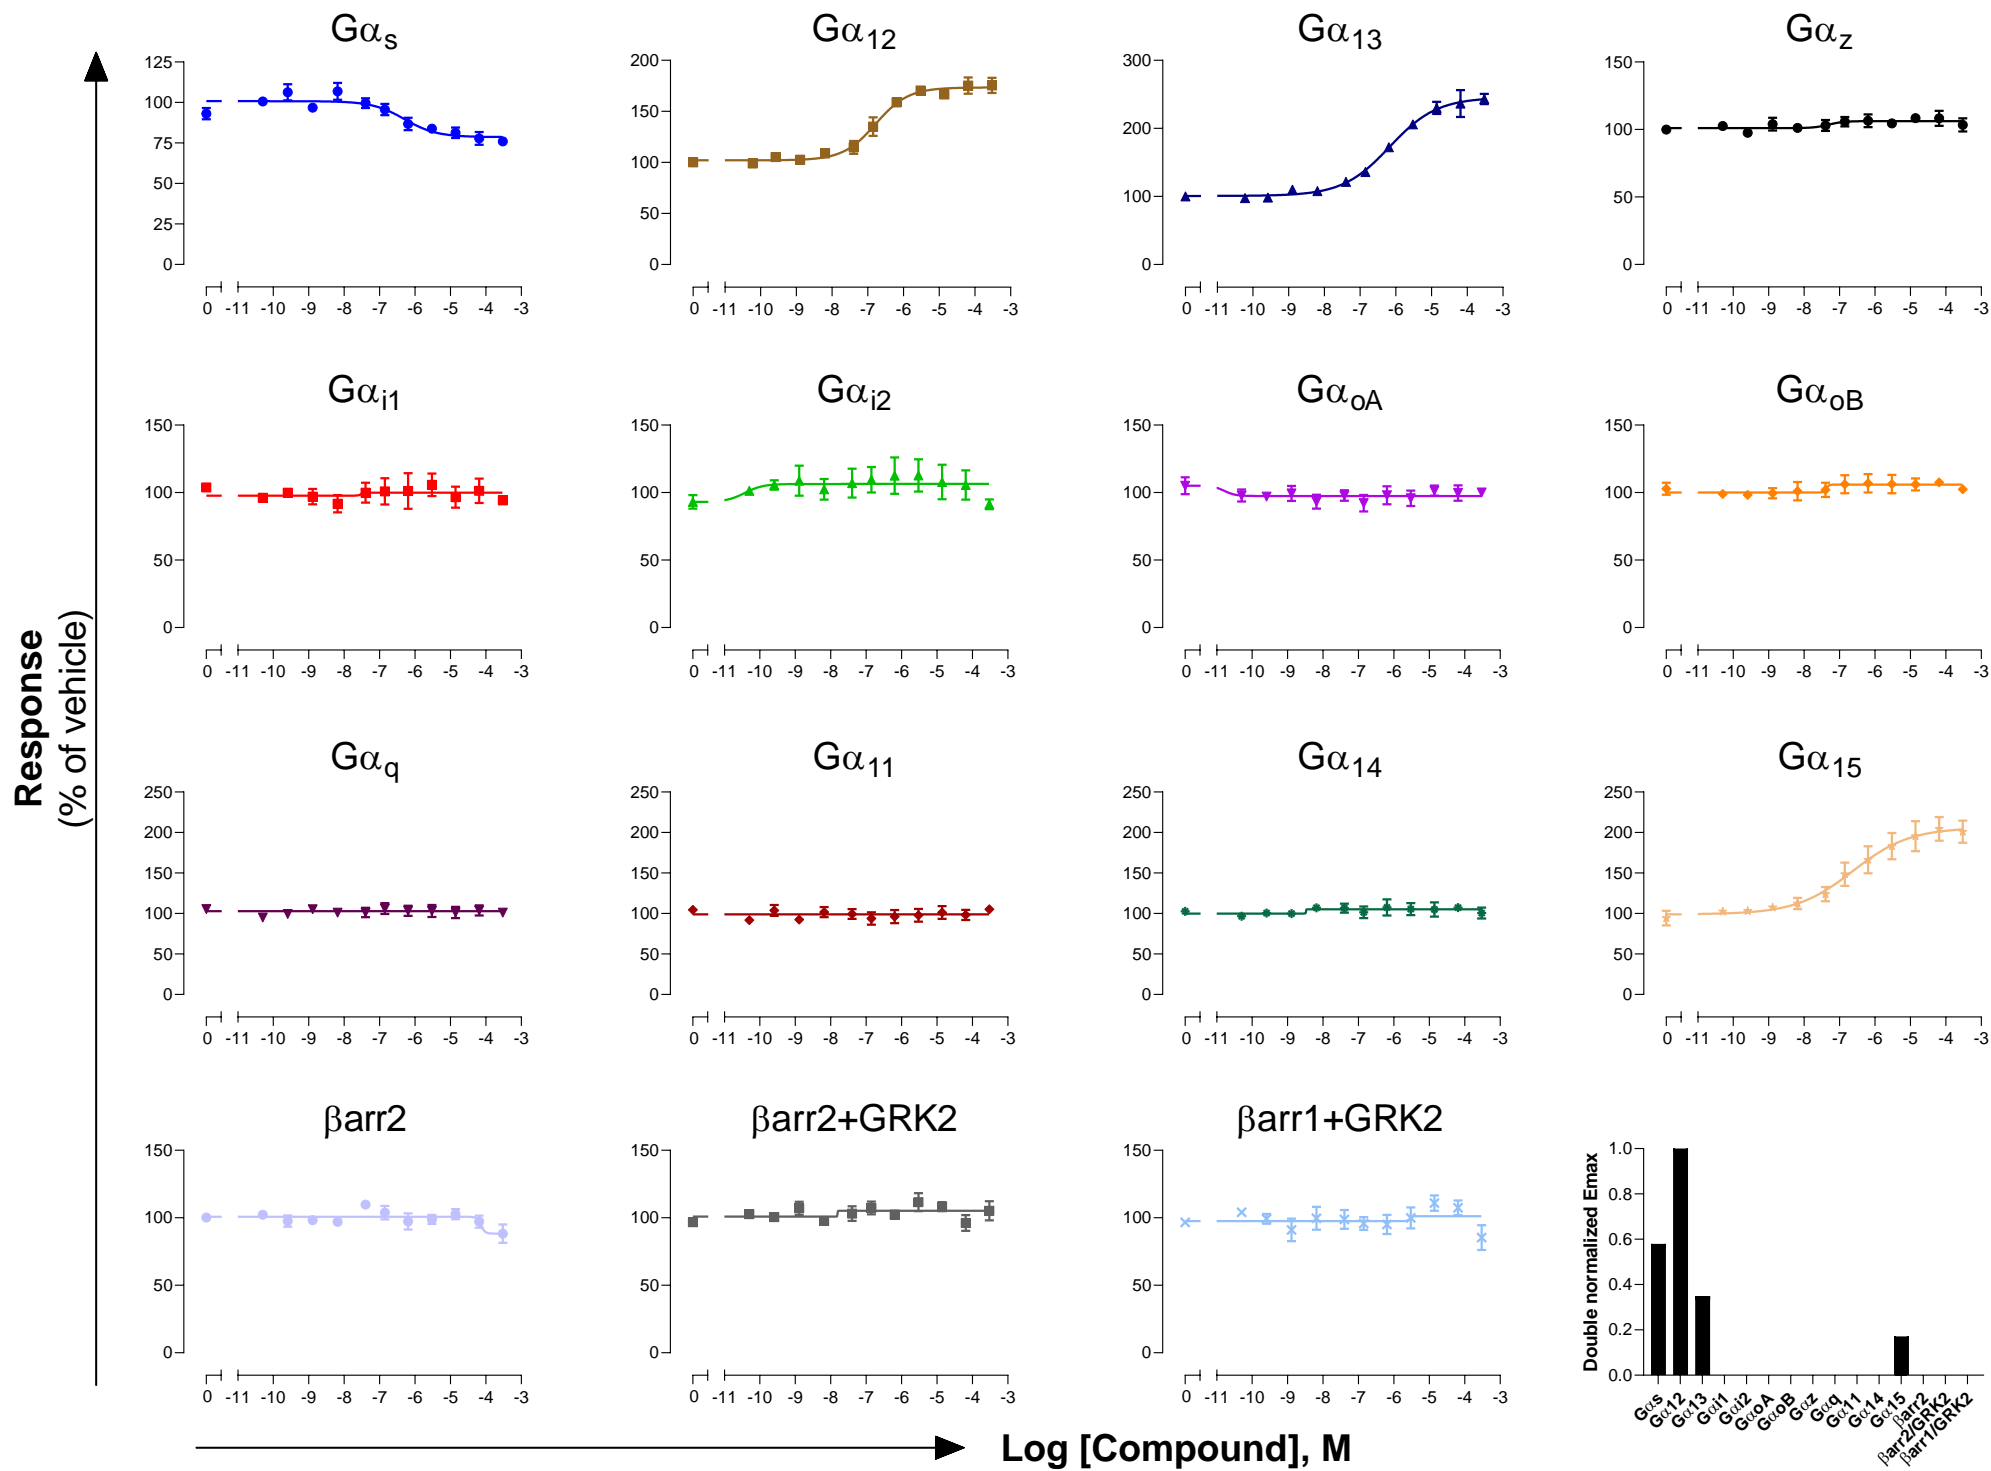

# GPCR: A<sub>2B</sub>

Ligand: Adenosine

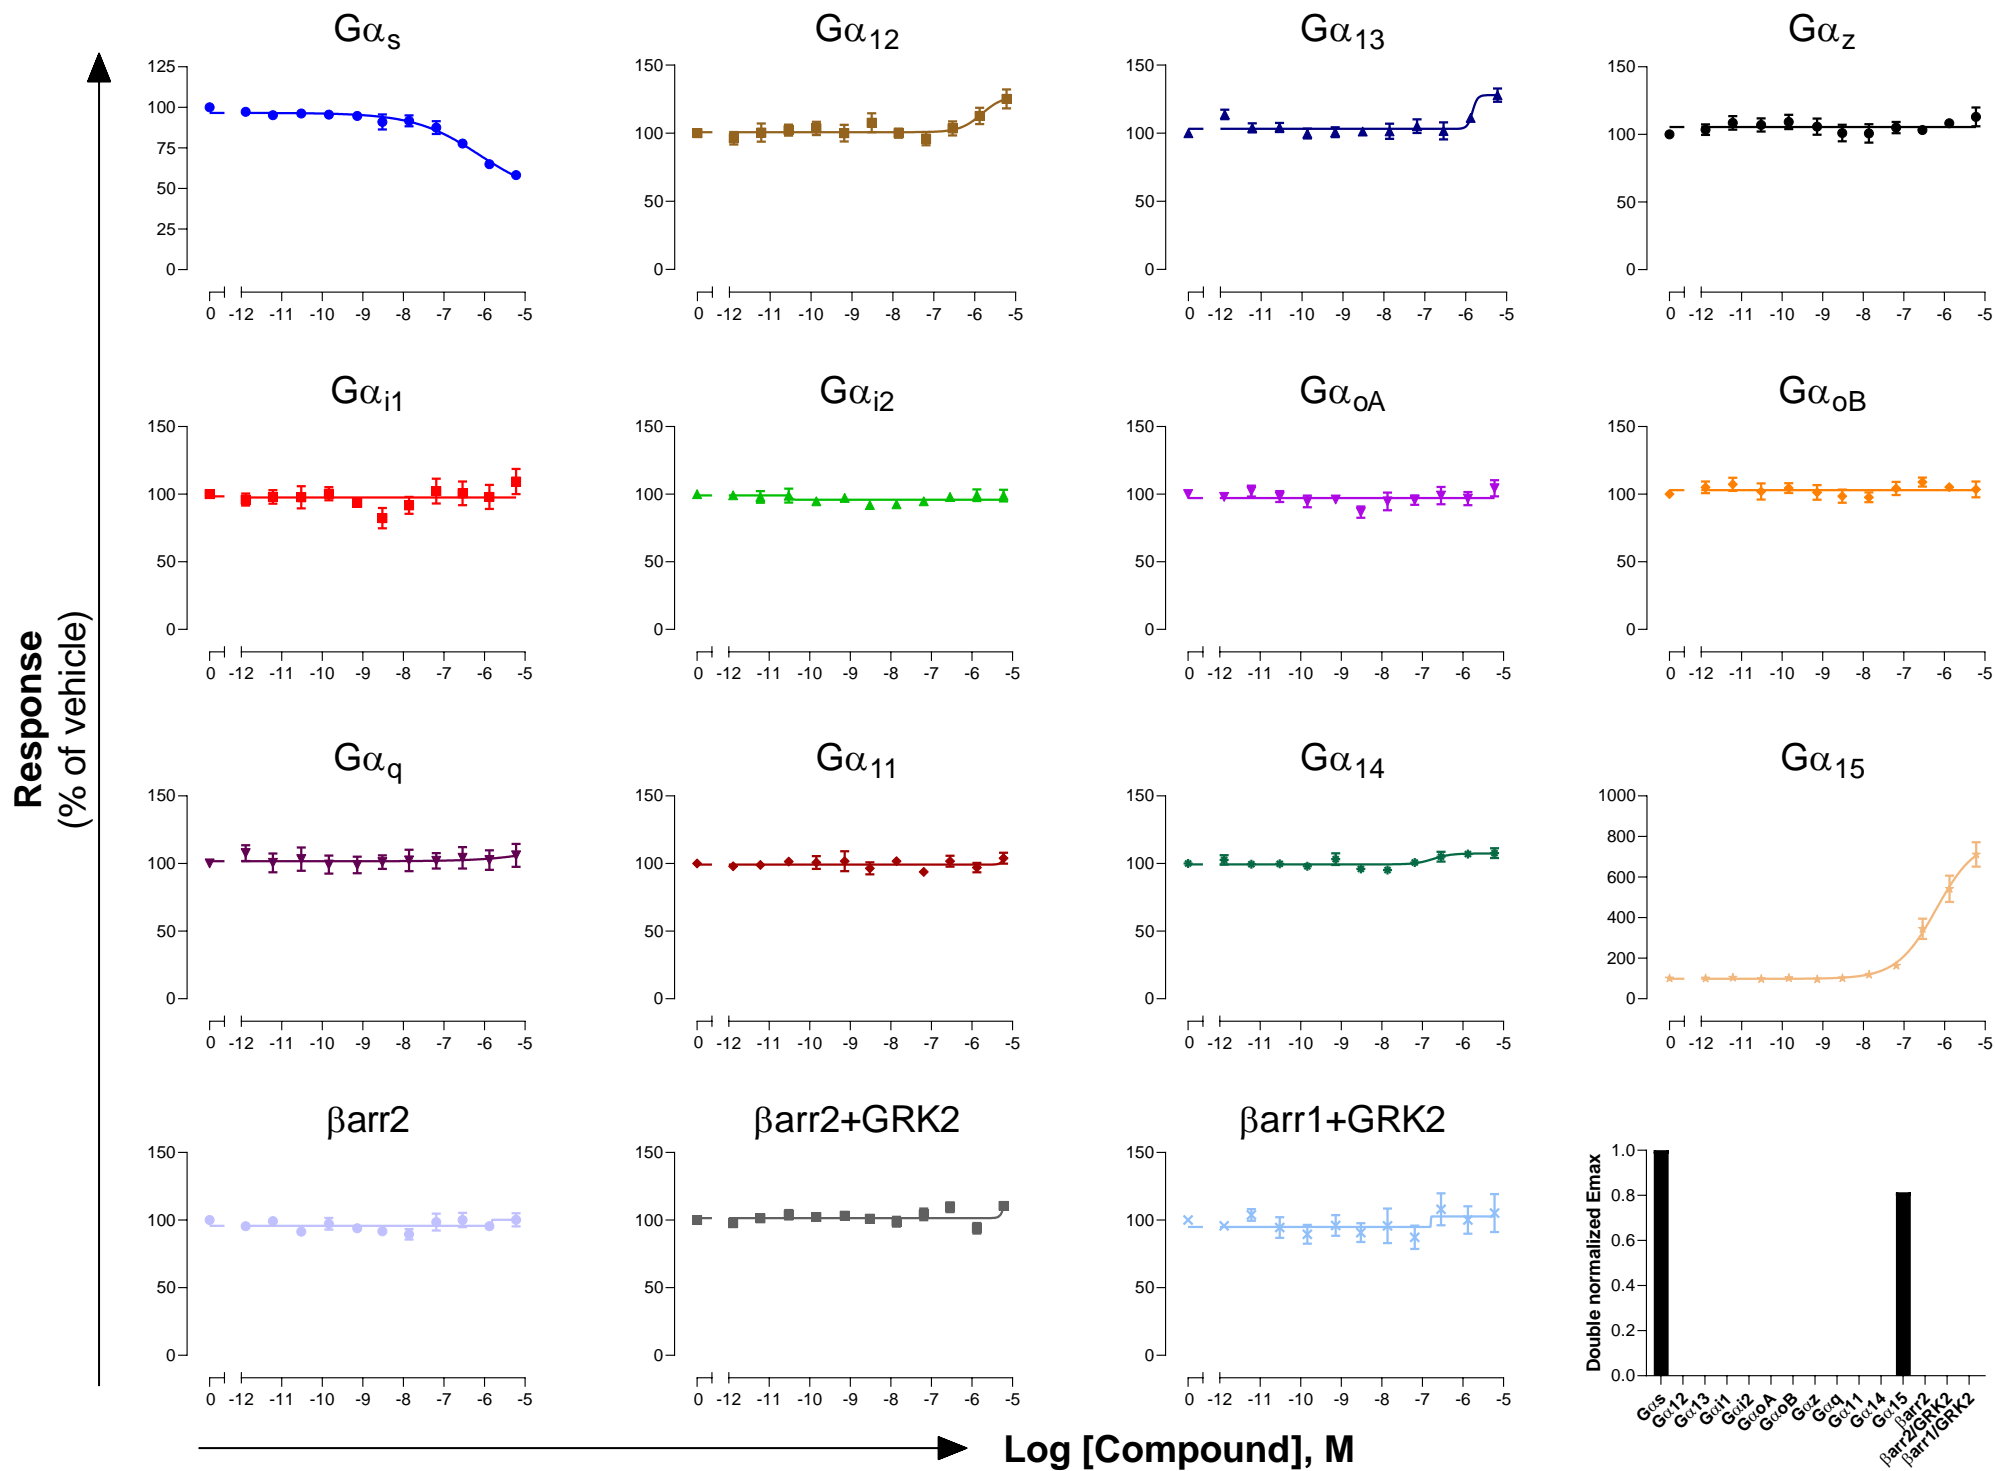

# GPCR: A<sub>3</sub>

Ligand: Adenosine

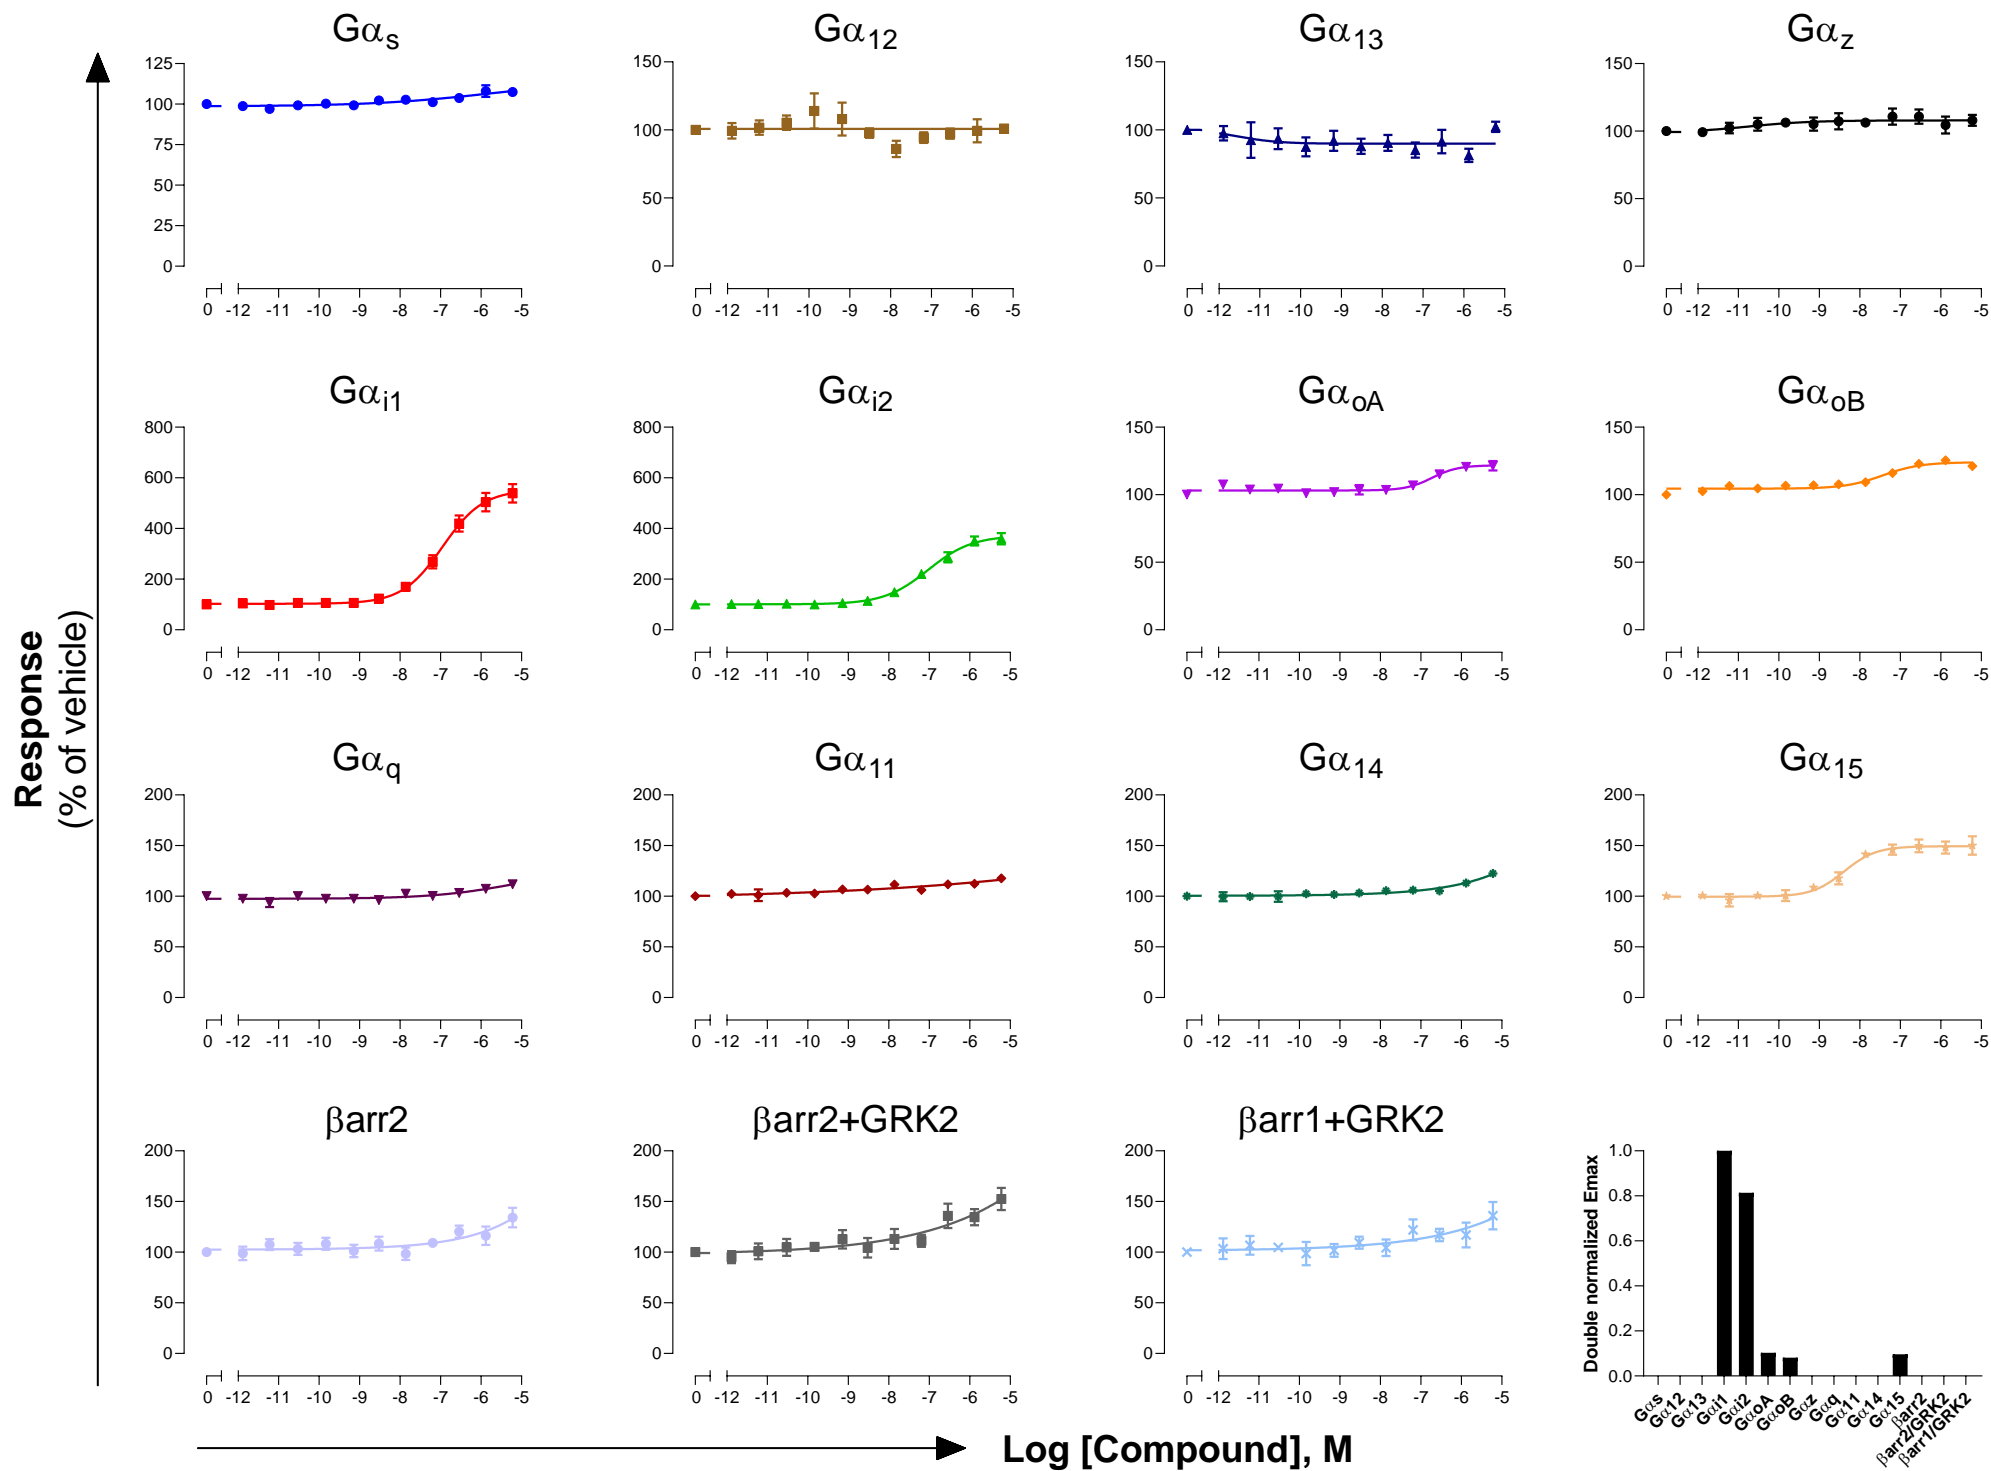



**GPCR: AMY<sub>3</sub>**  
**Ligand: Amylin**

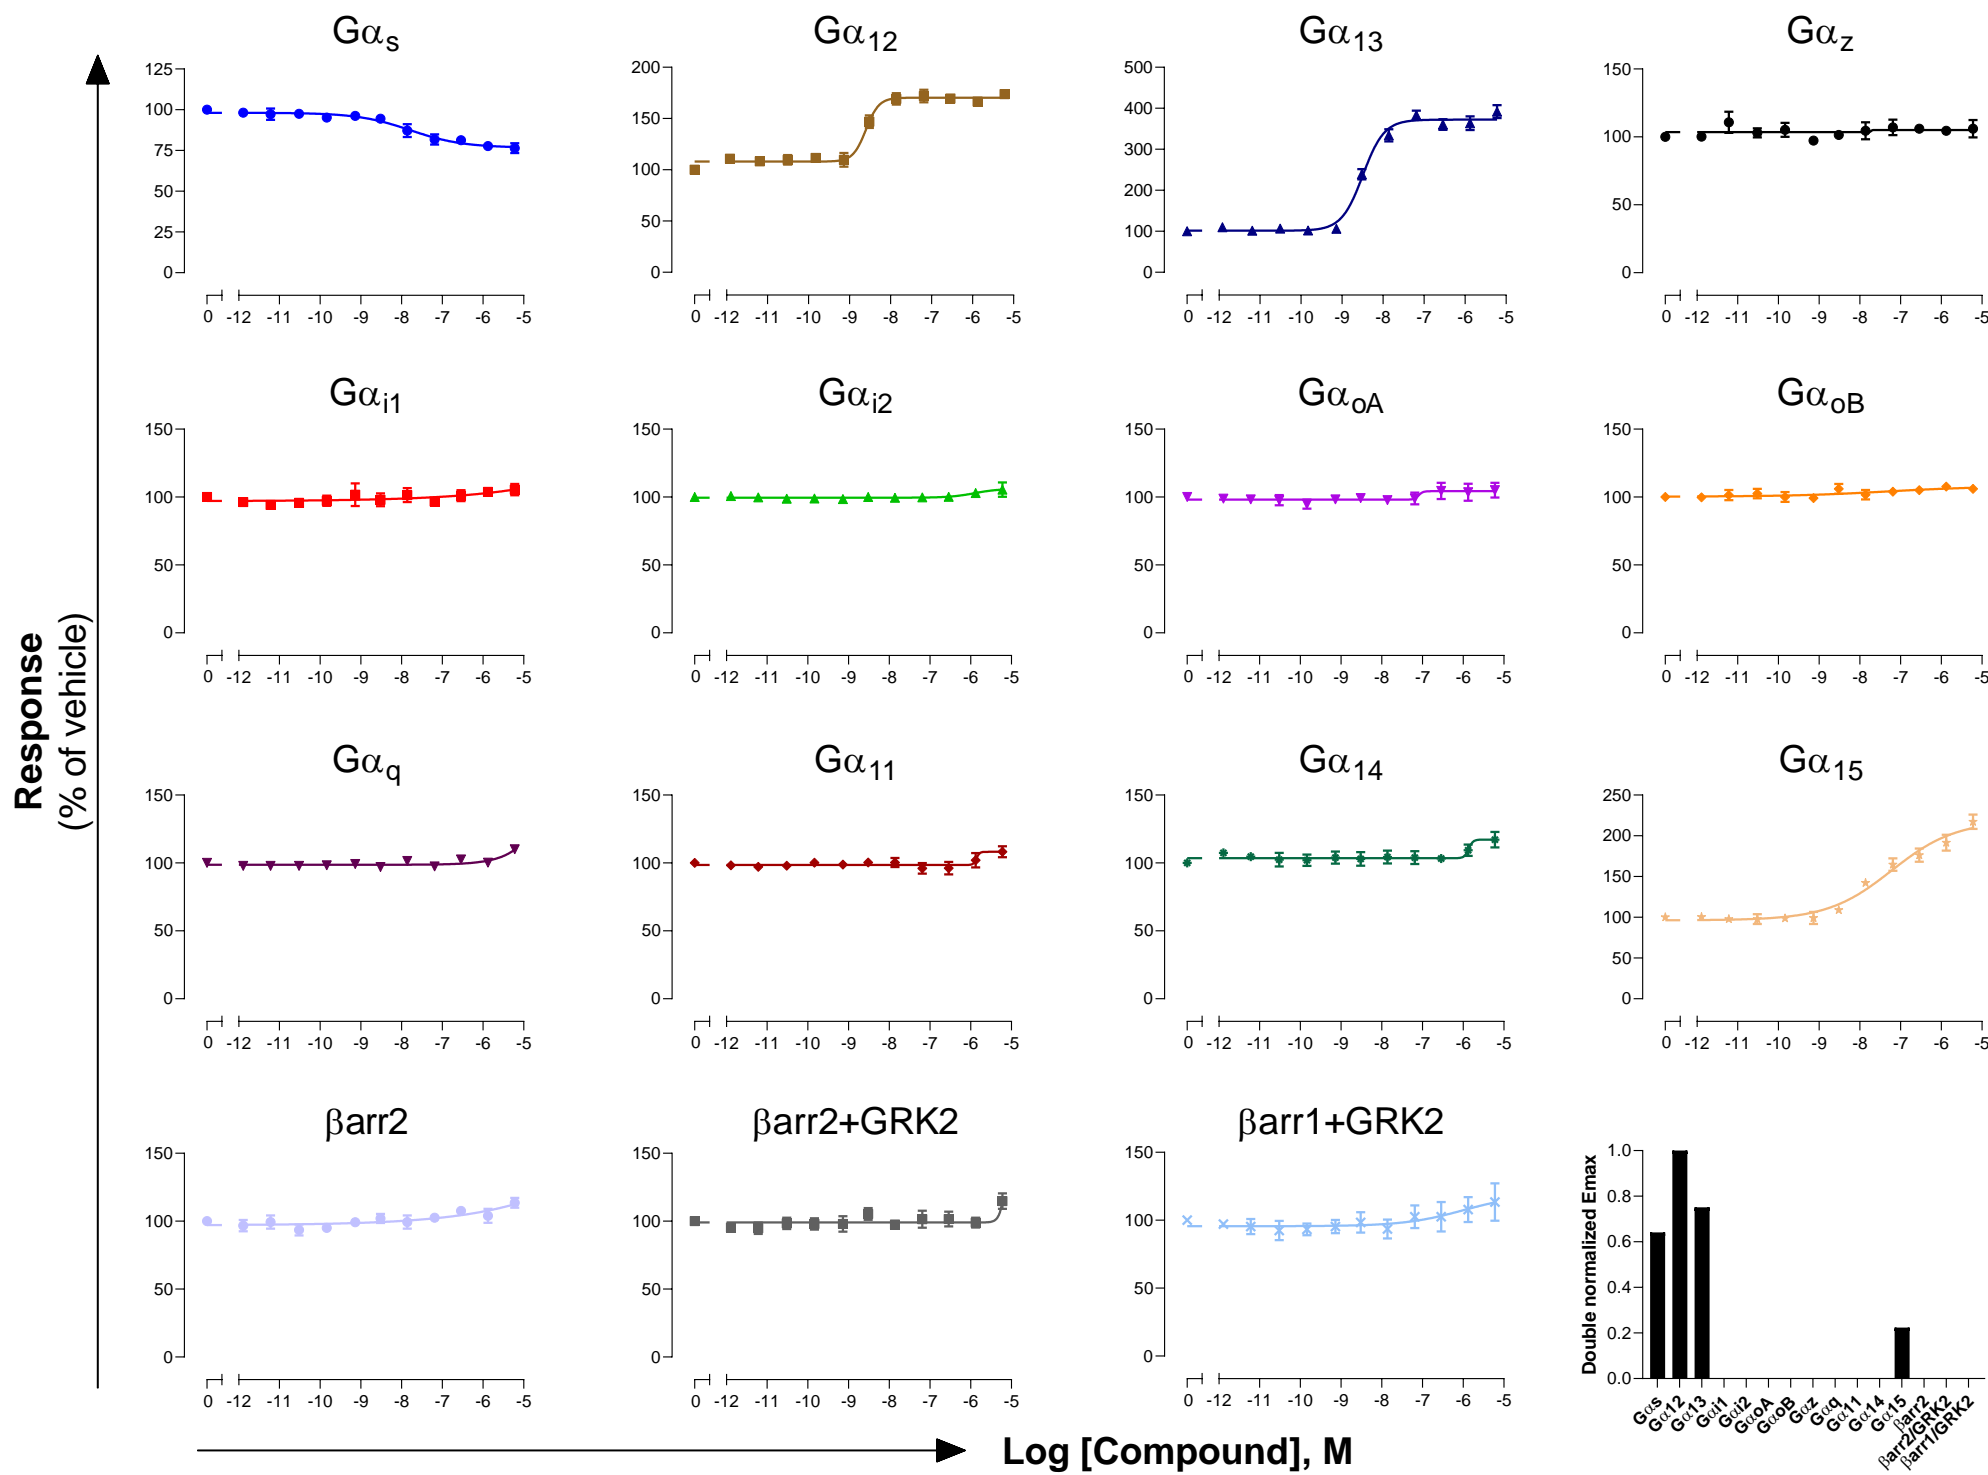

**GPCR: APJ**  
**Ligand: [Pyr1]-Apelin 13**

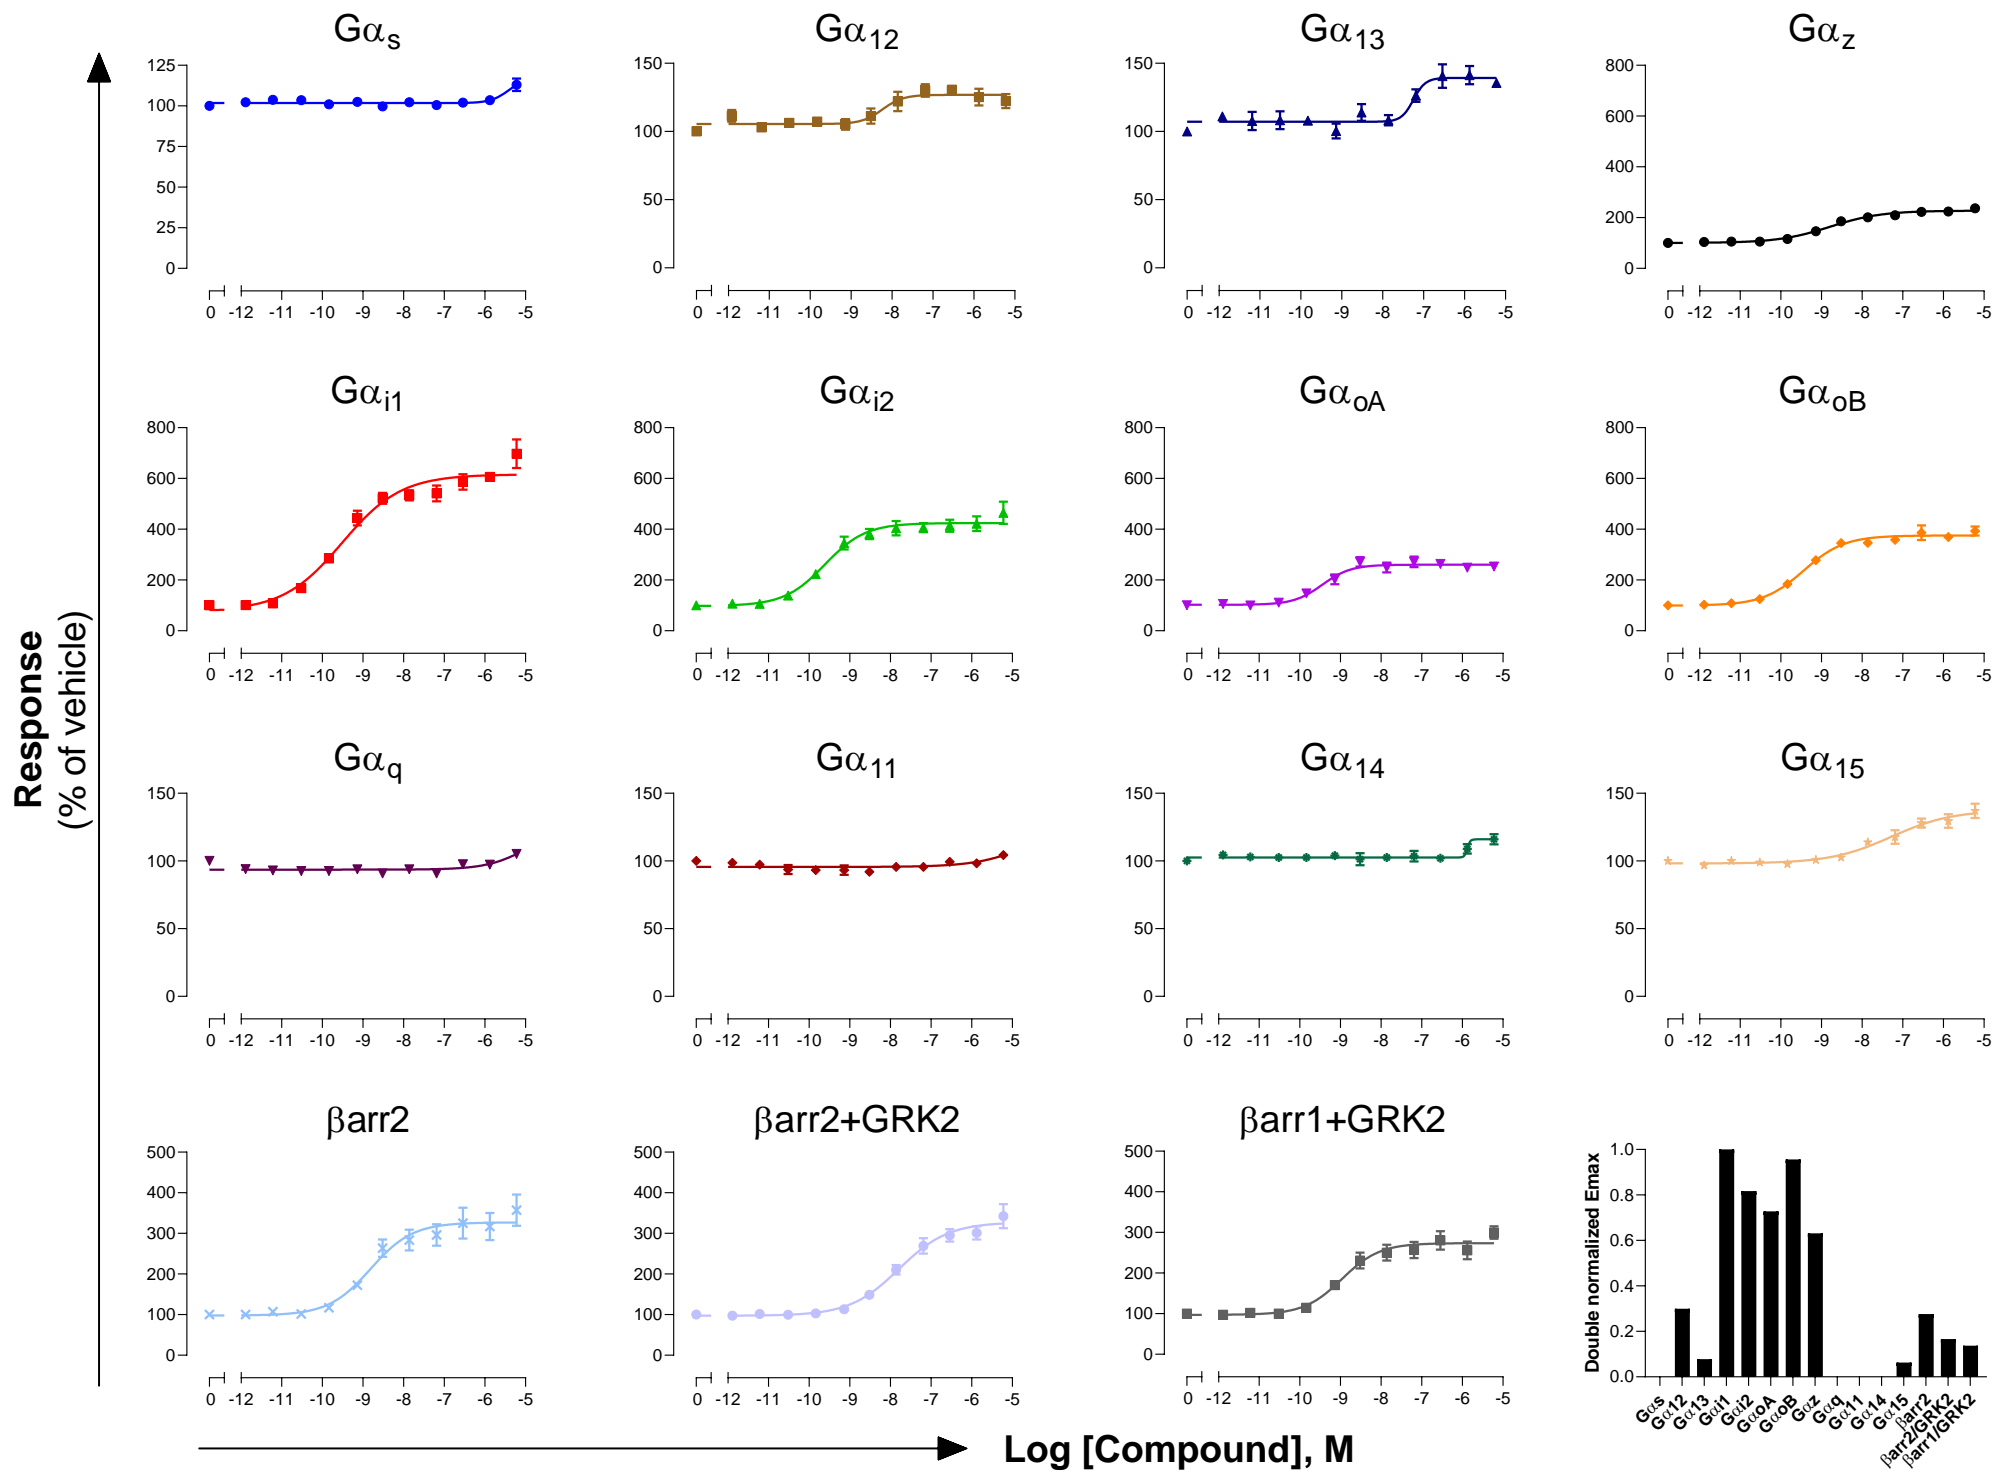

# GPCR: AT<sub>1</sub>

Ligand: Angiotensin II

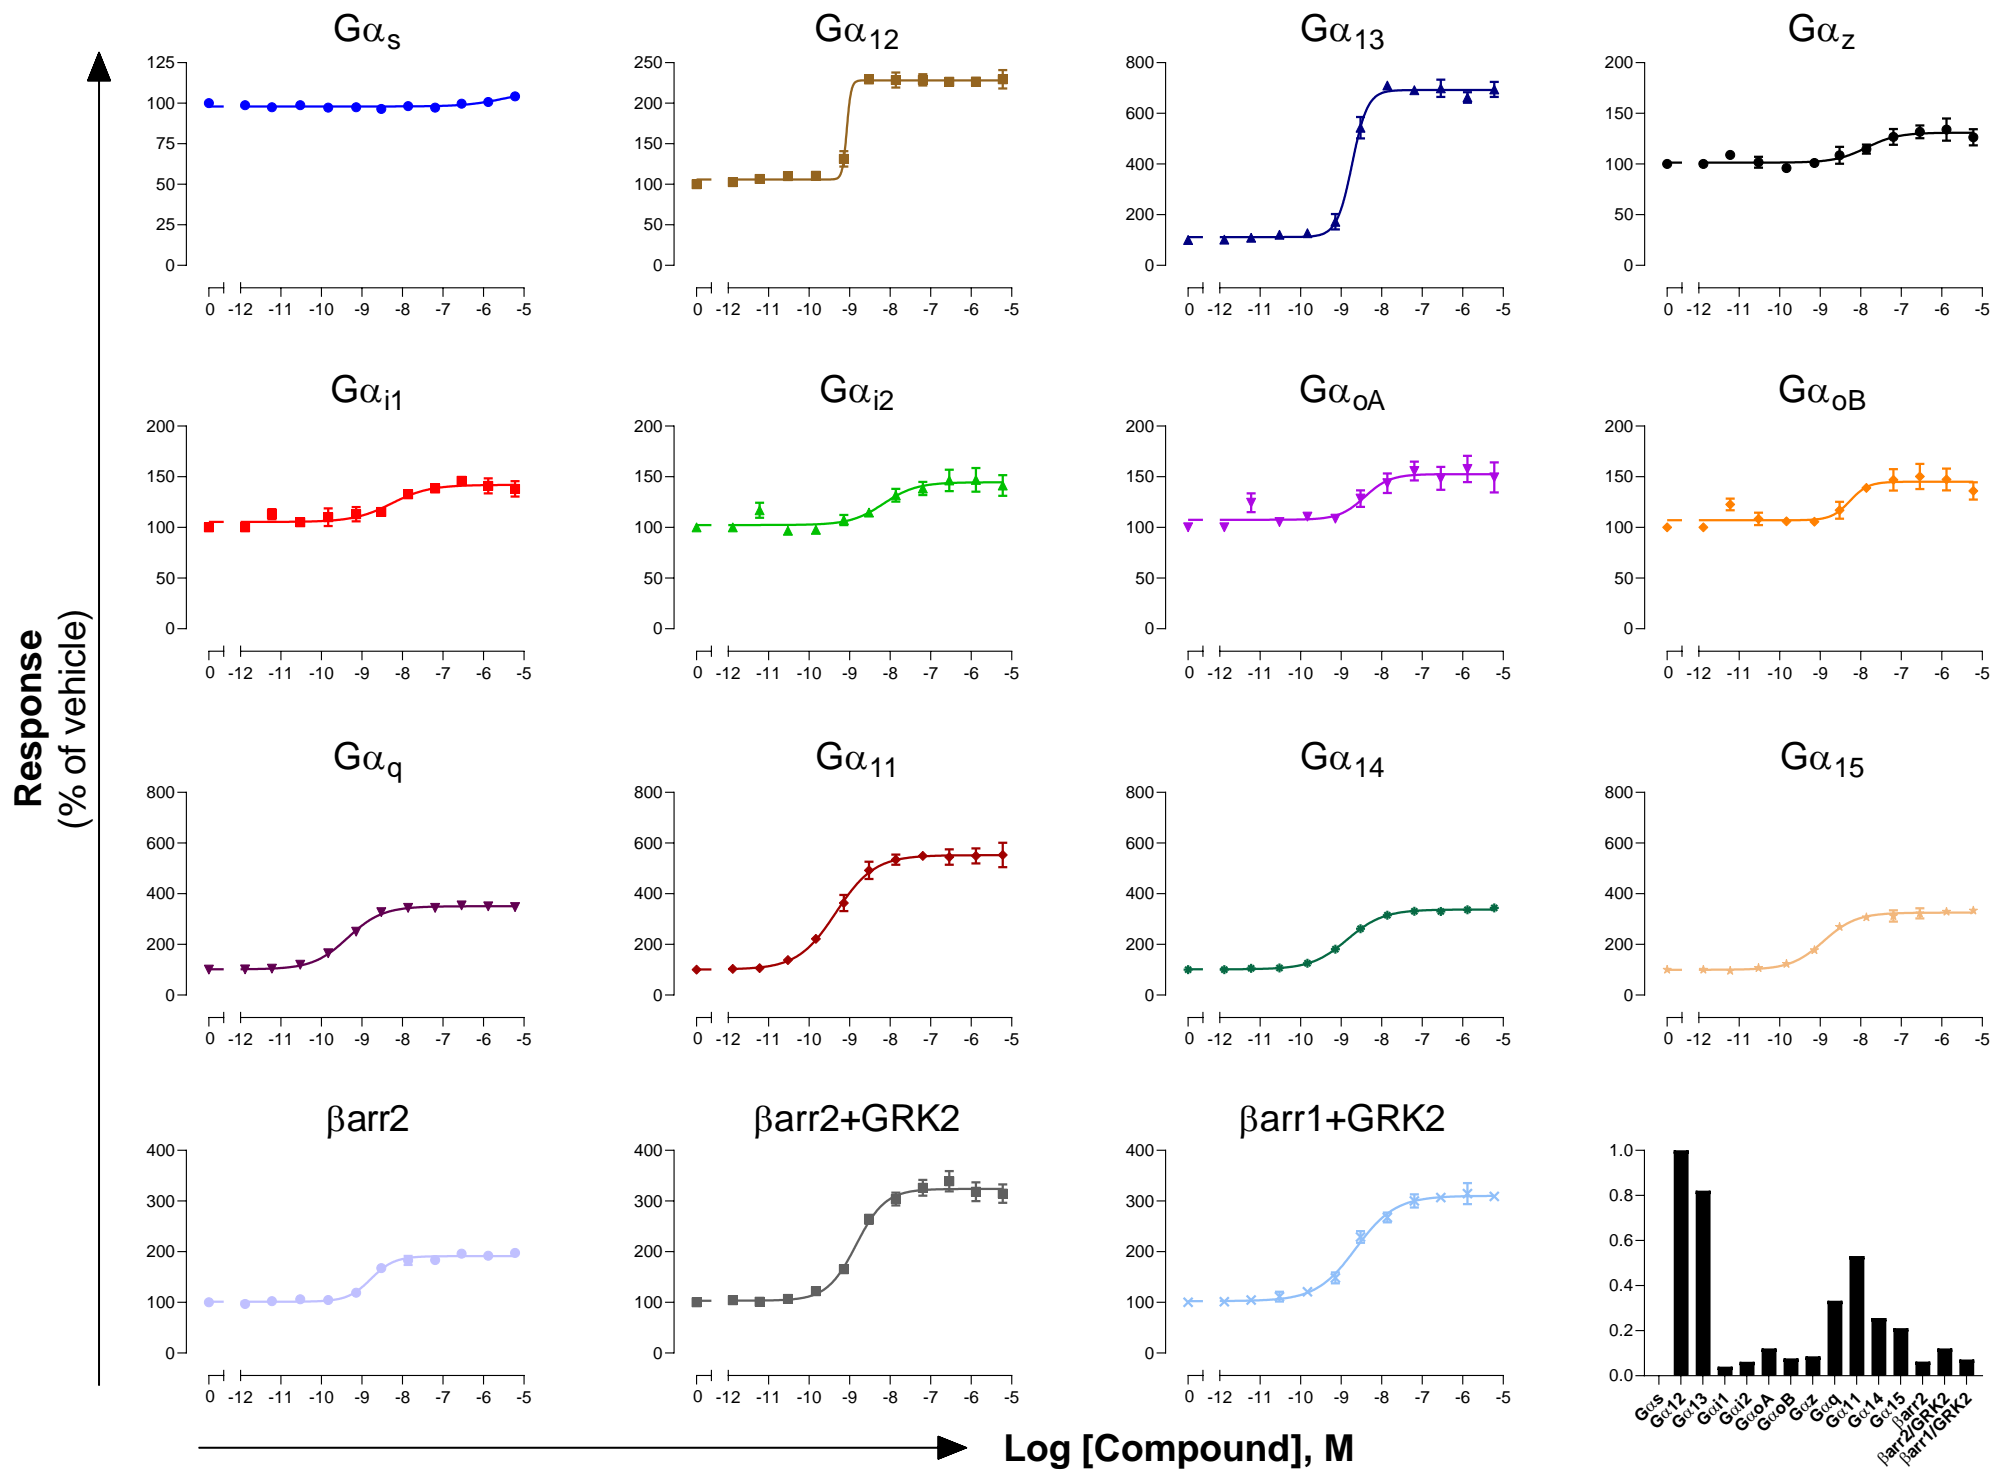

**GPCR: B<sub>1</sub>**  
**Ligand: Kallidin**

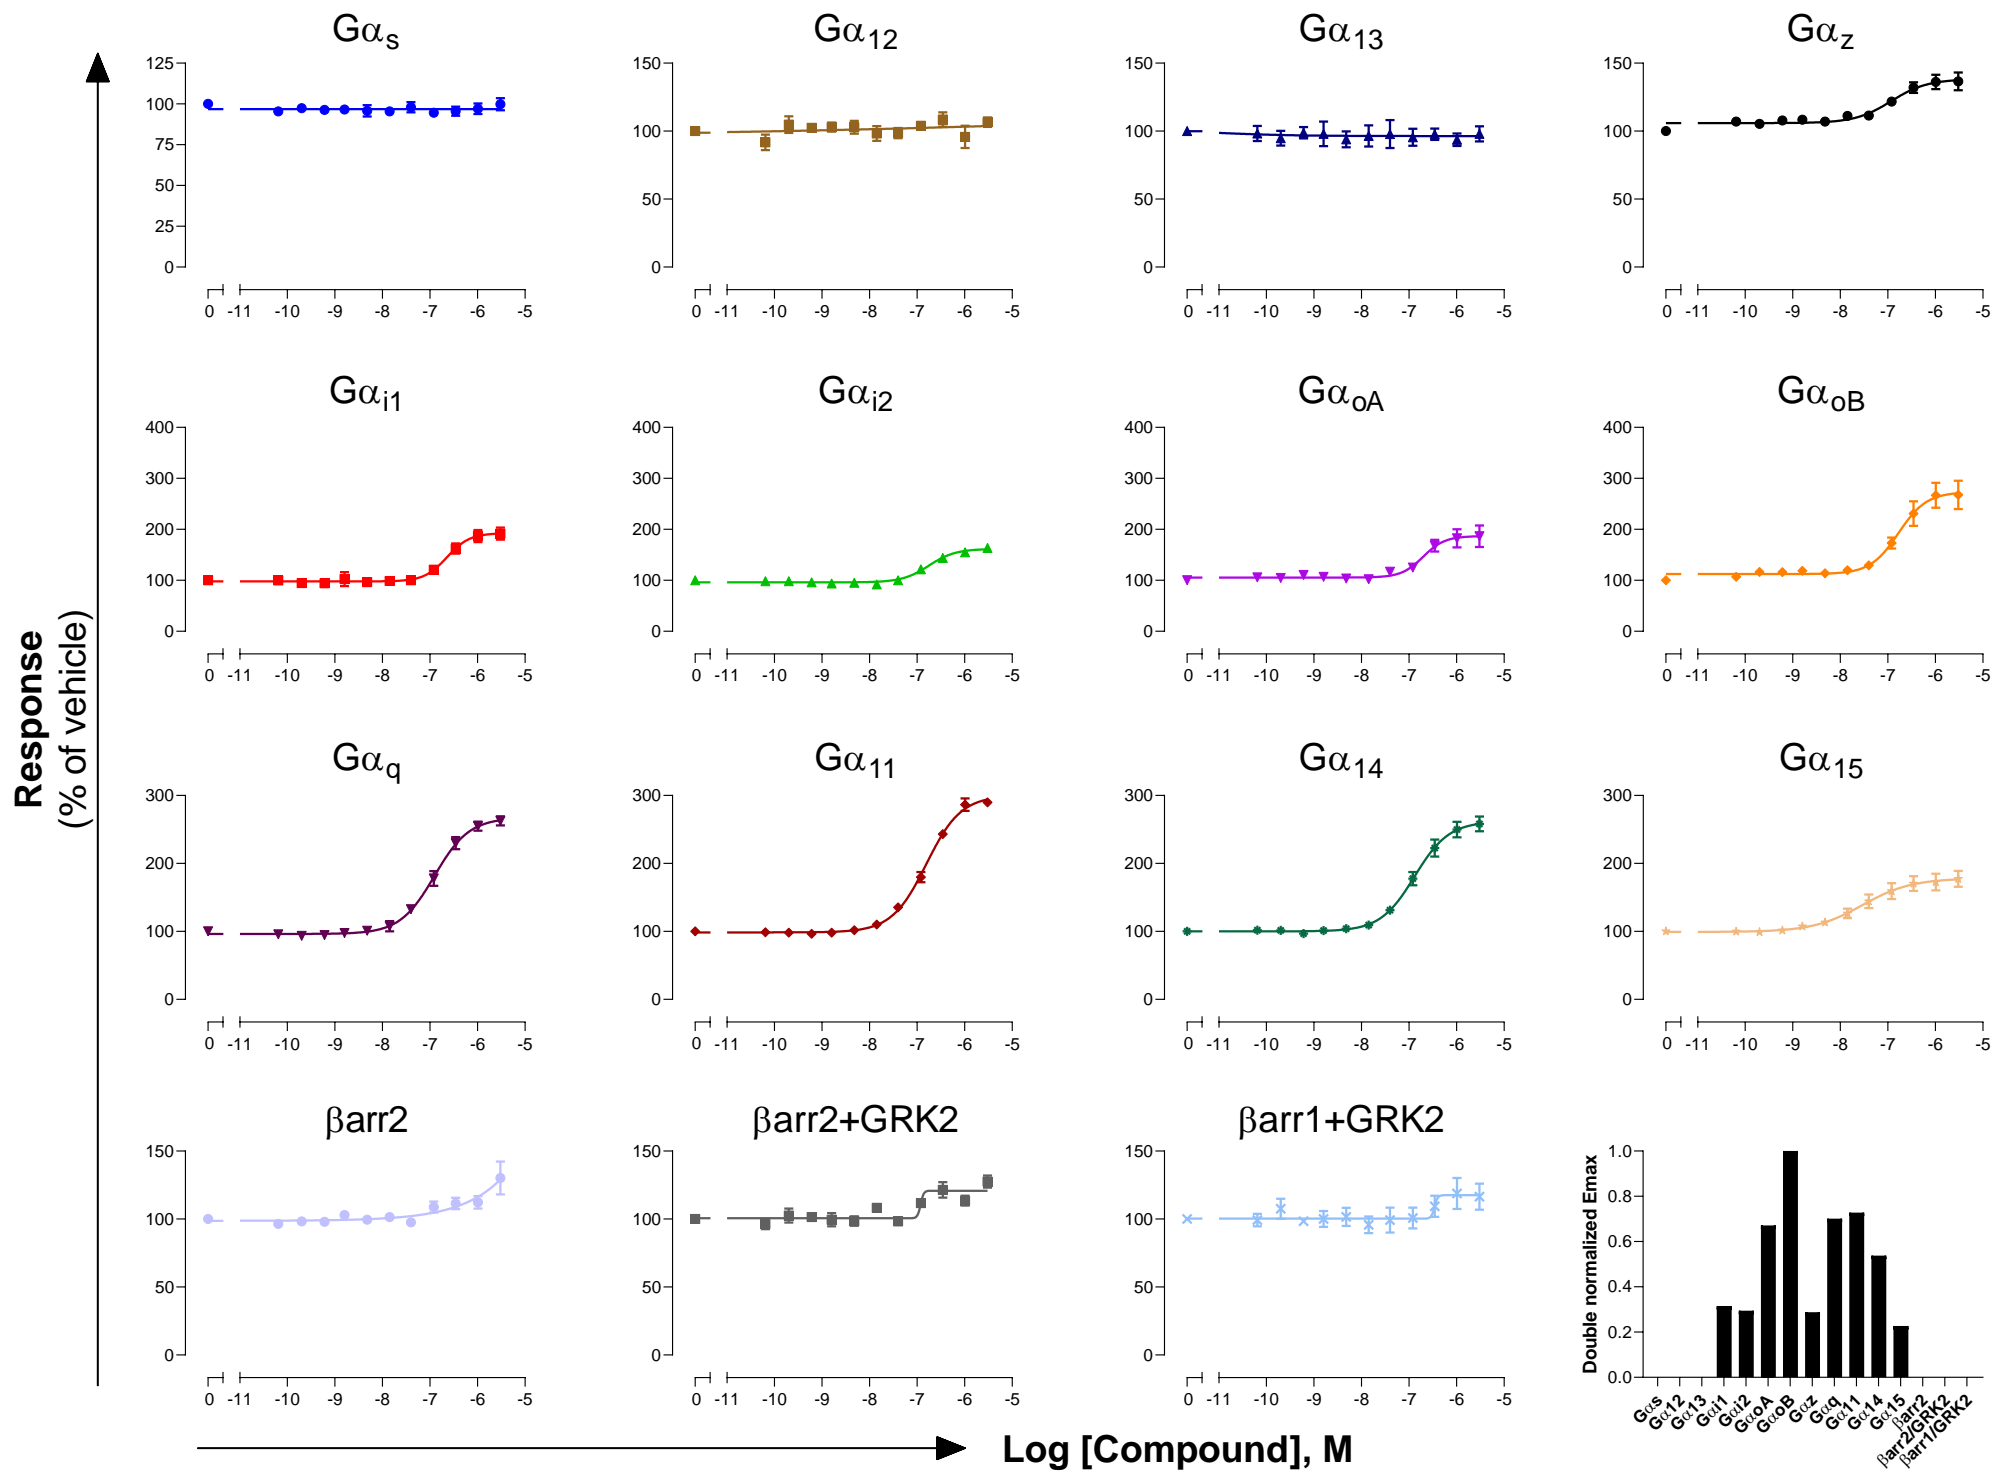

**GPCR: B<sub>2</sub>**  
**Ligand: Kallidin**

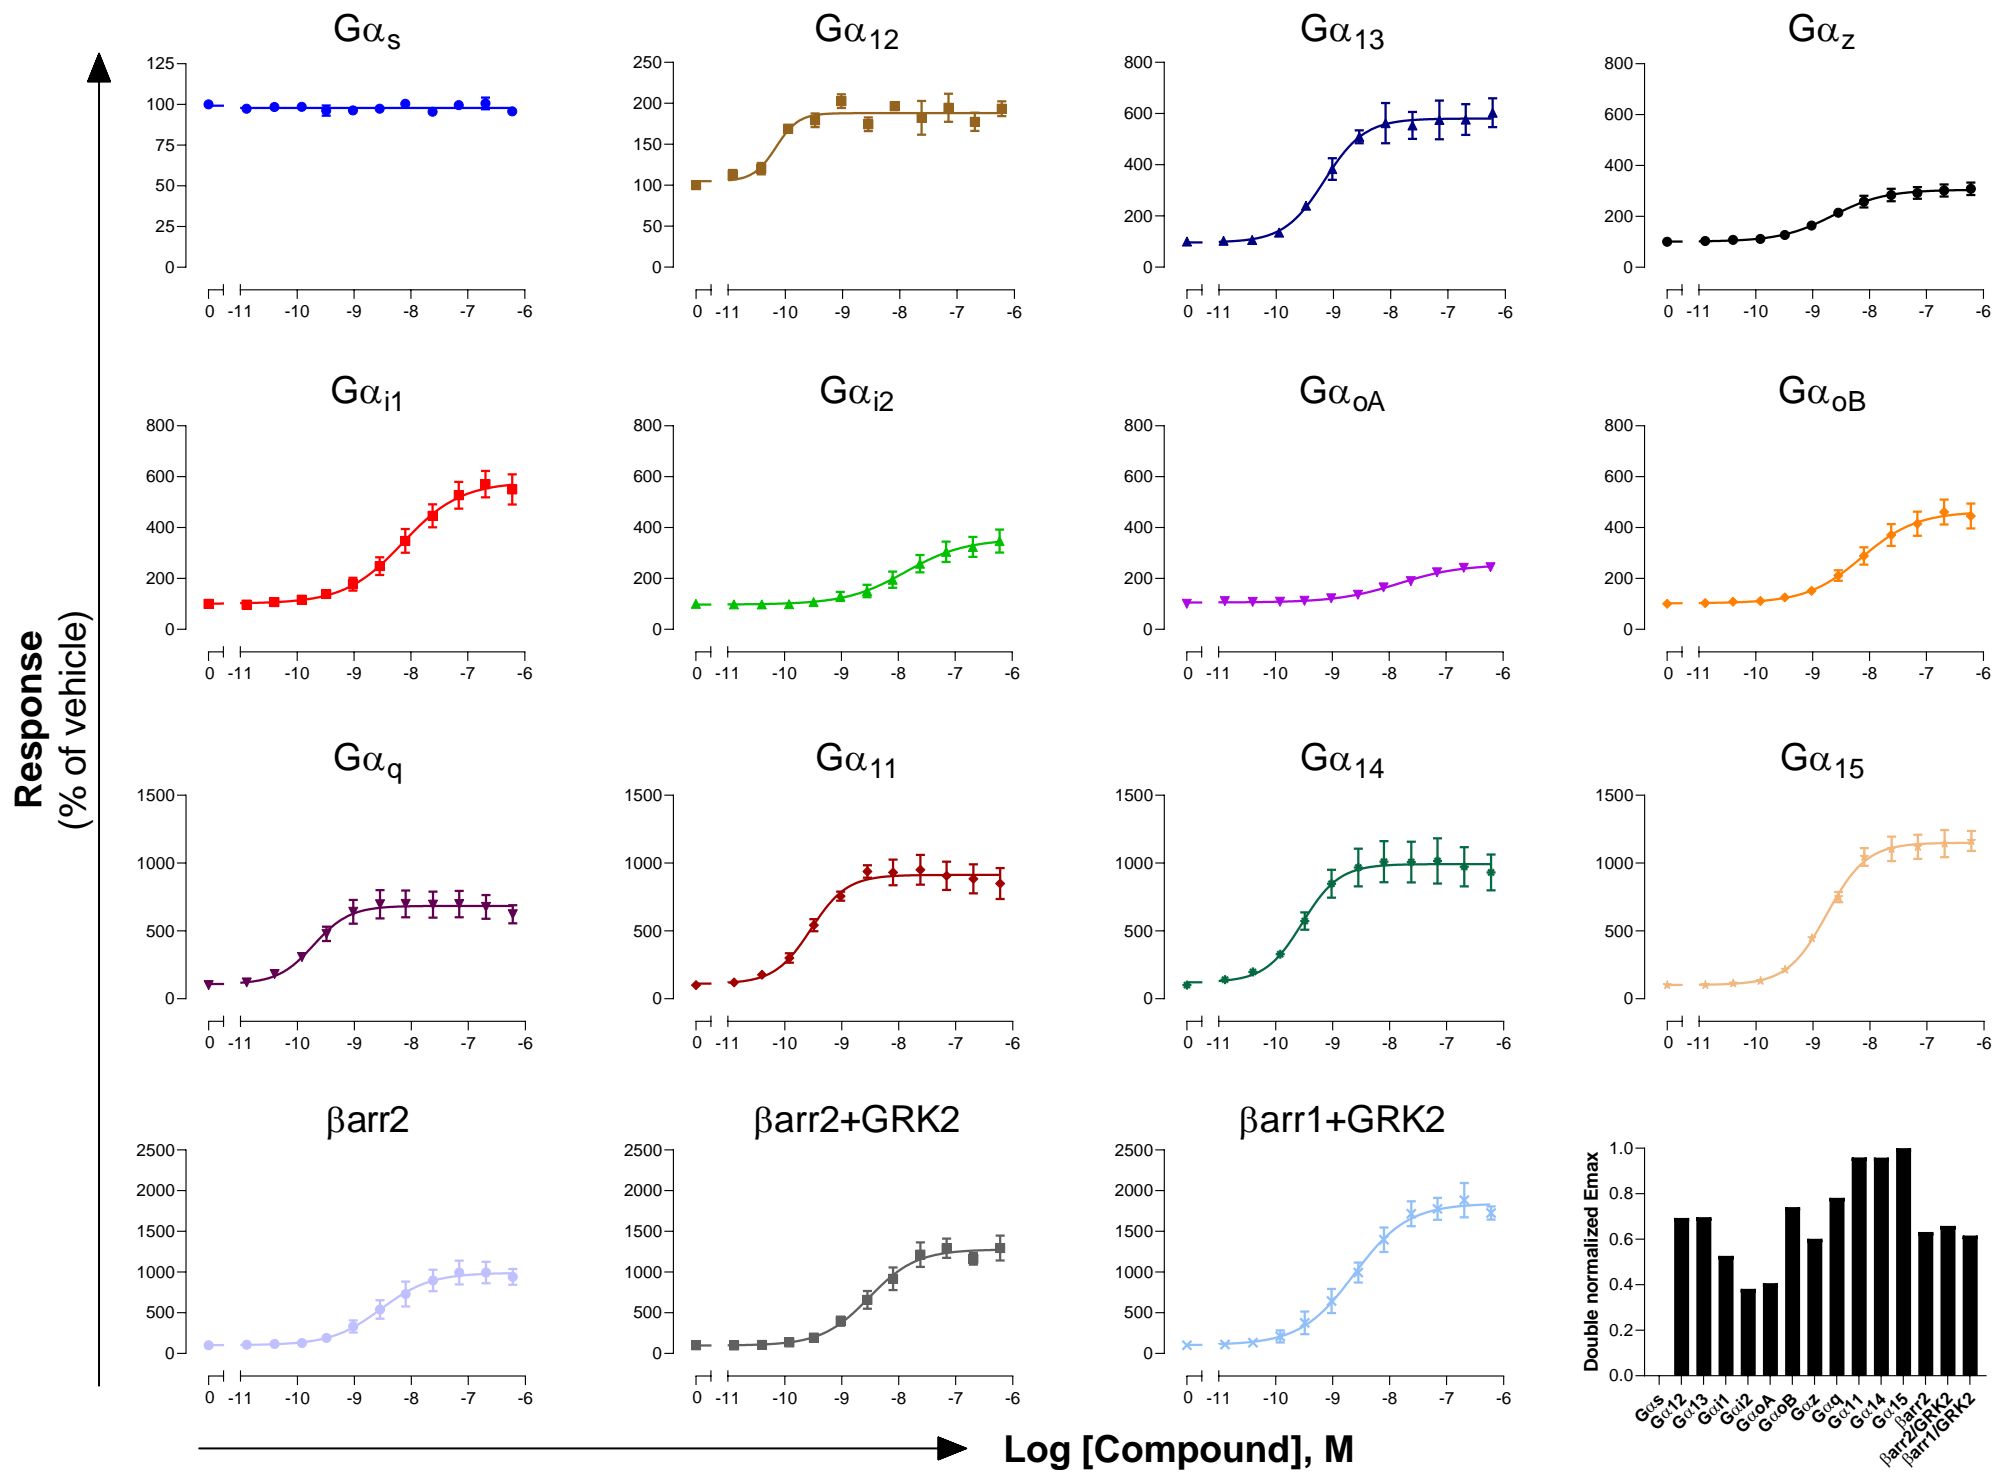

**GPCR: BLT<sub>1</sub>**  
**Ligand: LTB<sub>4</sub>**

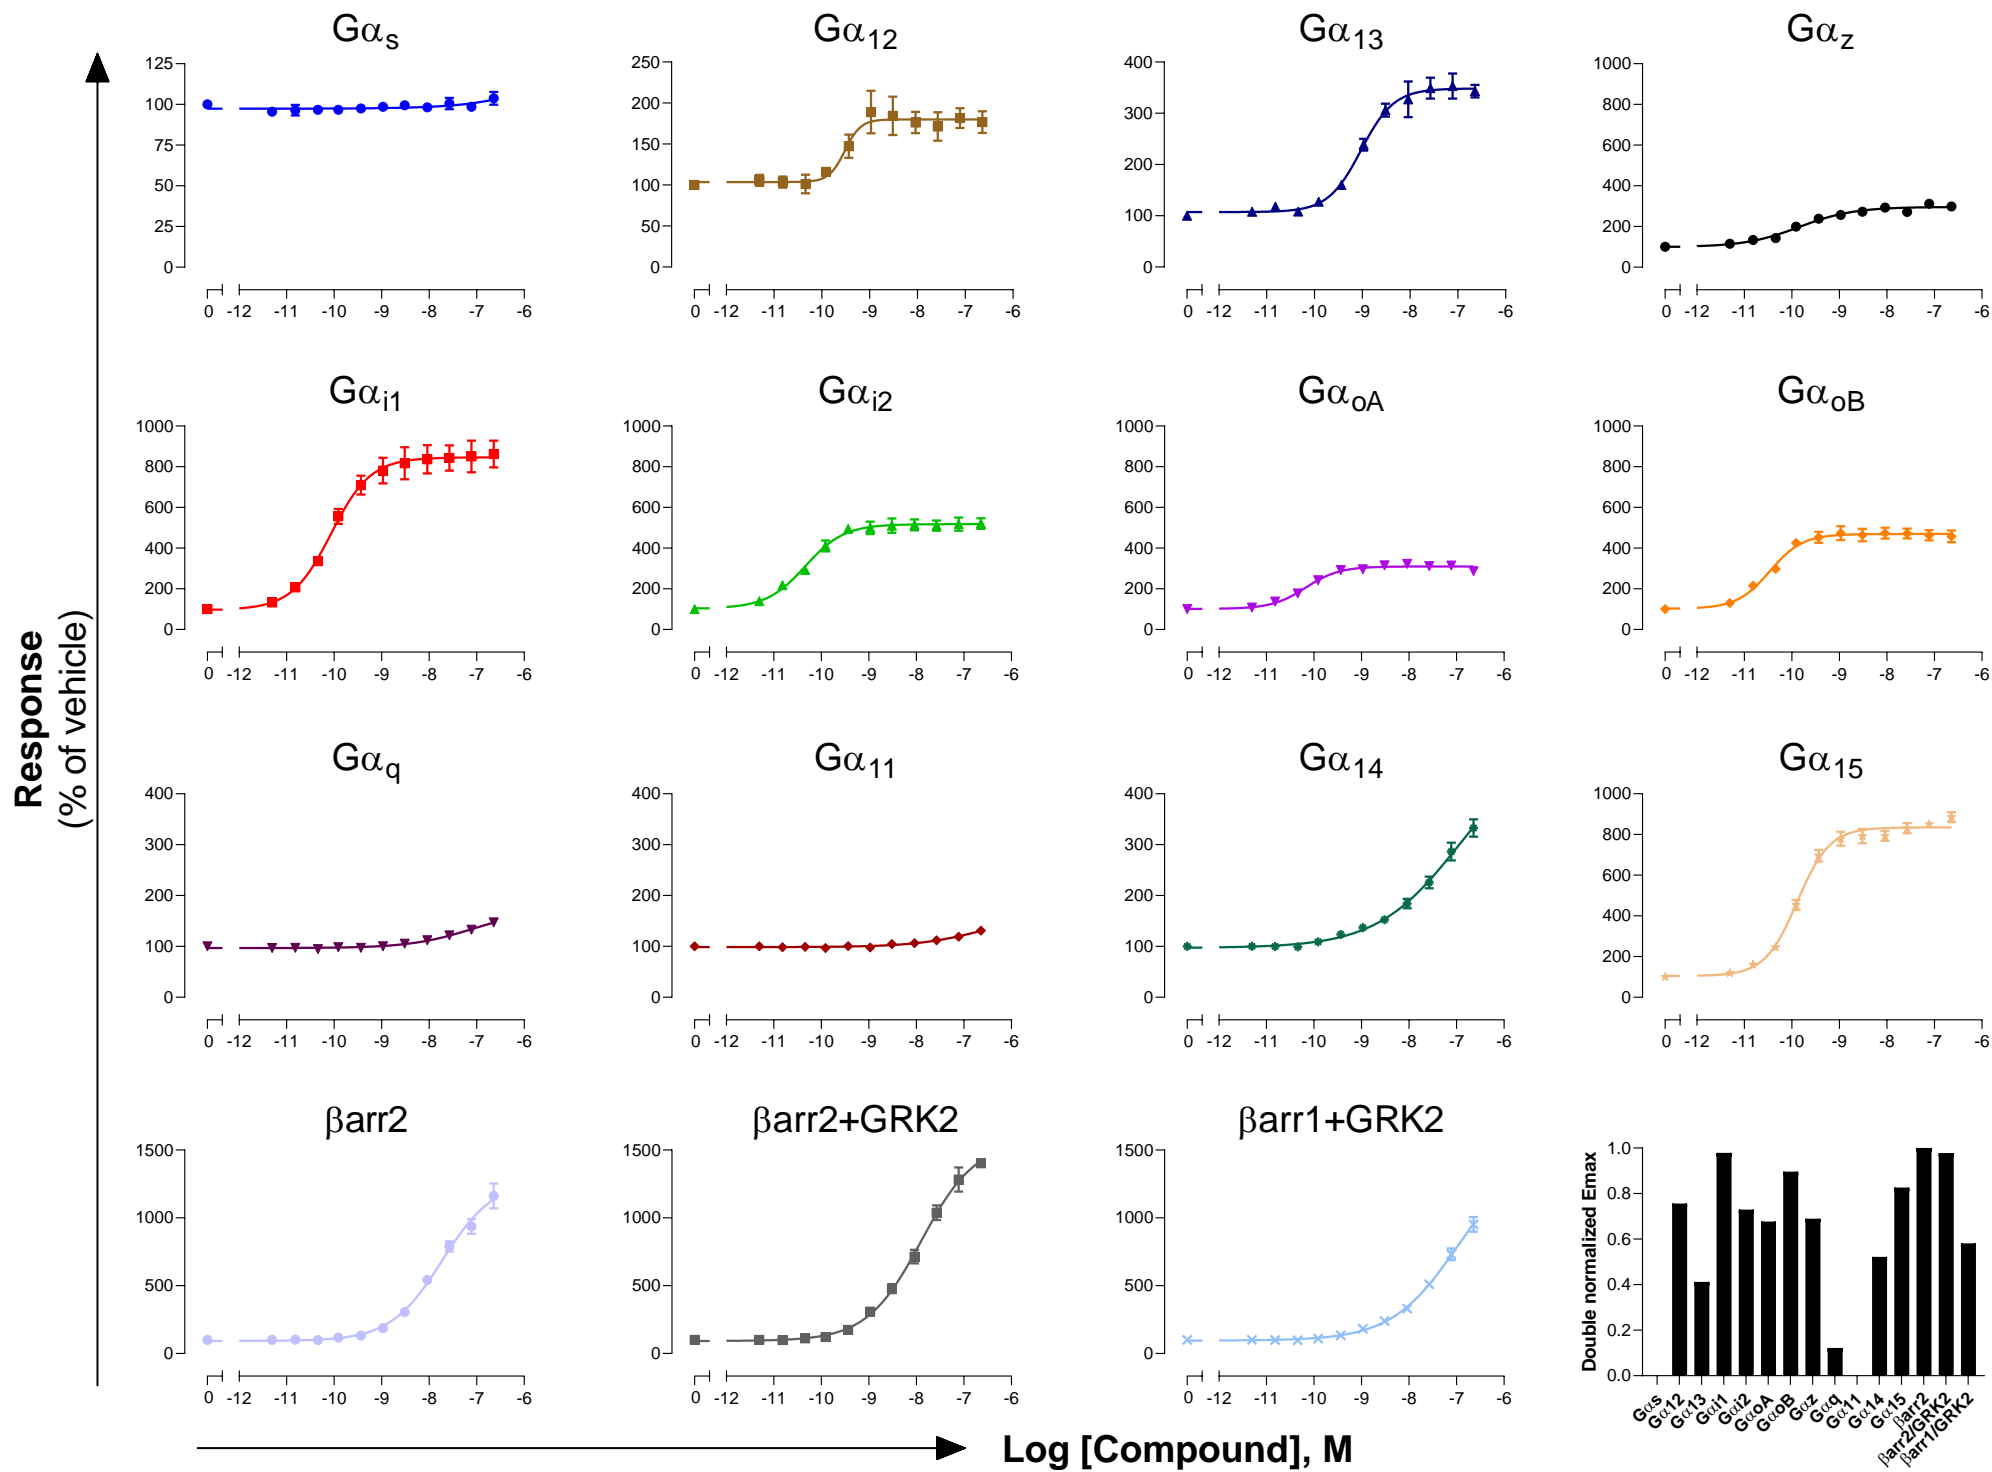

**GPCR: BLT<sub>2</sub>**  
**Ligand: LTB<sub>4</sub>**

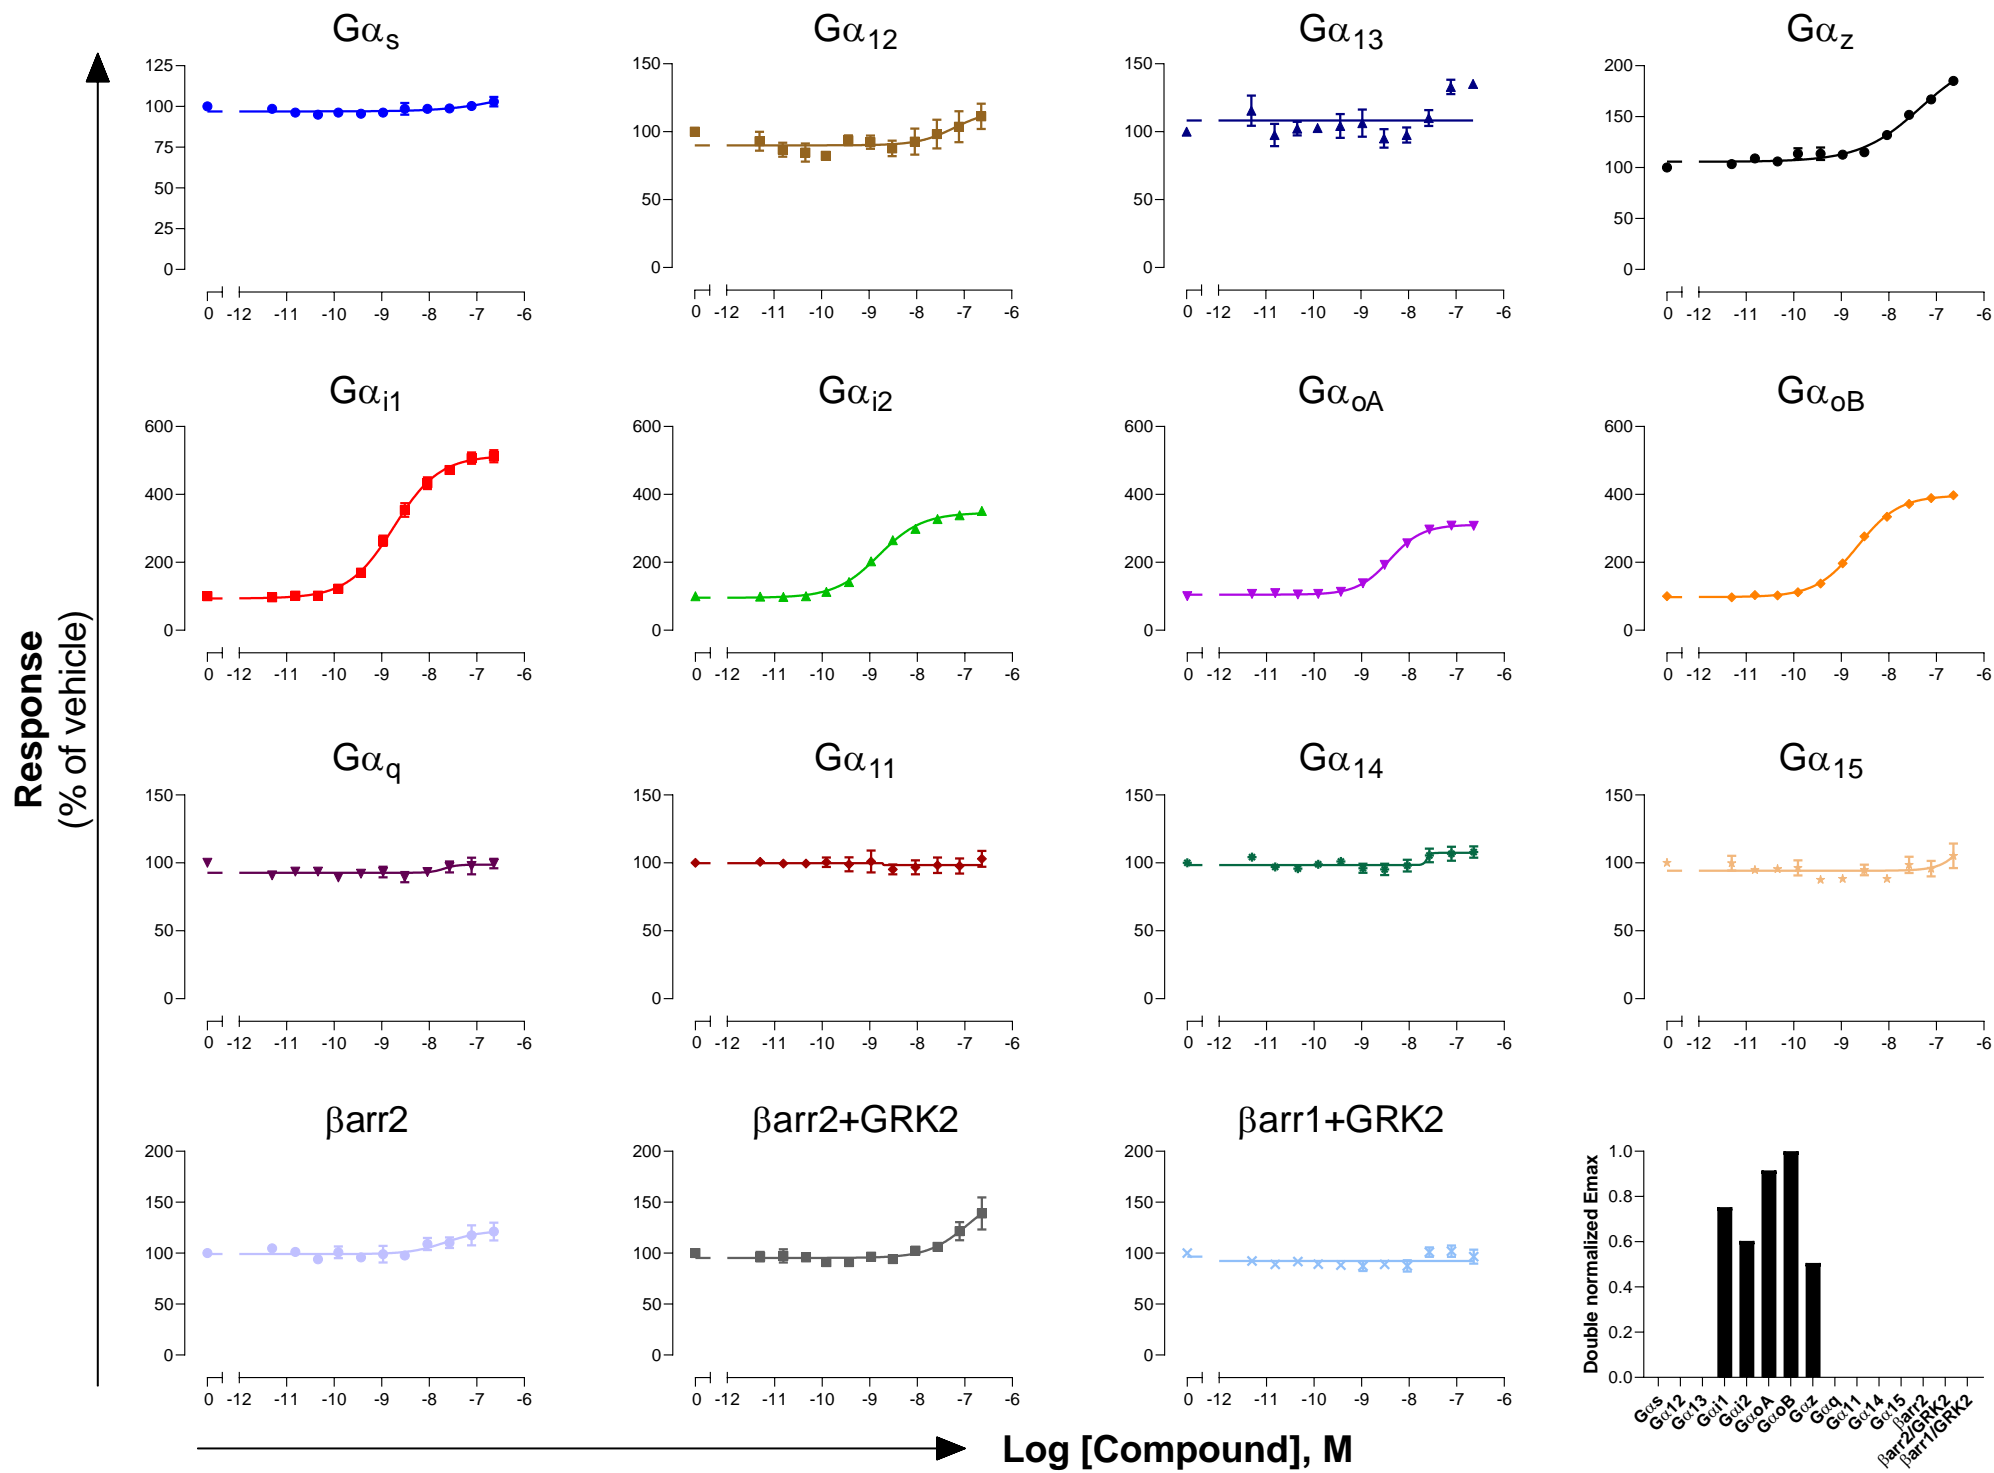

**GPCR: C5a<sub>1</sub>**  
**Ligand: C5a**

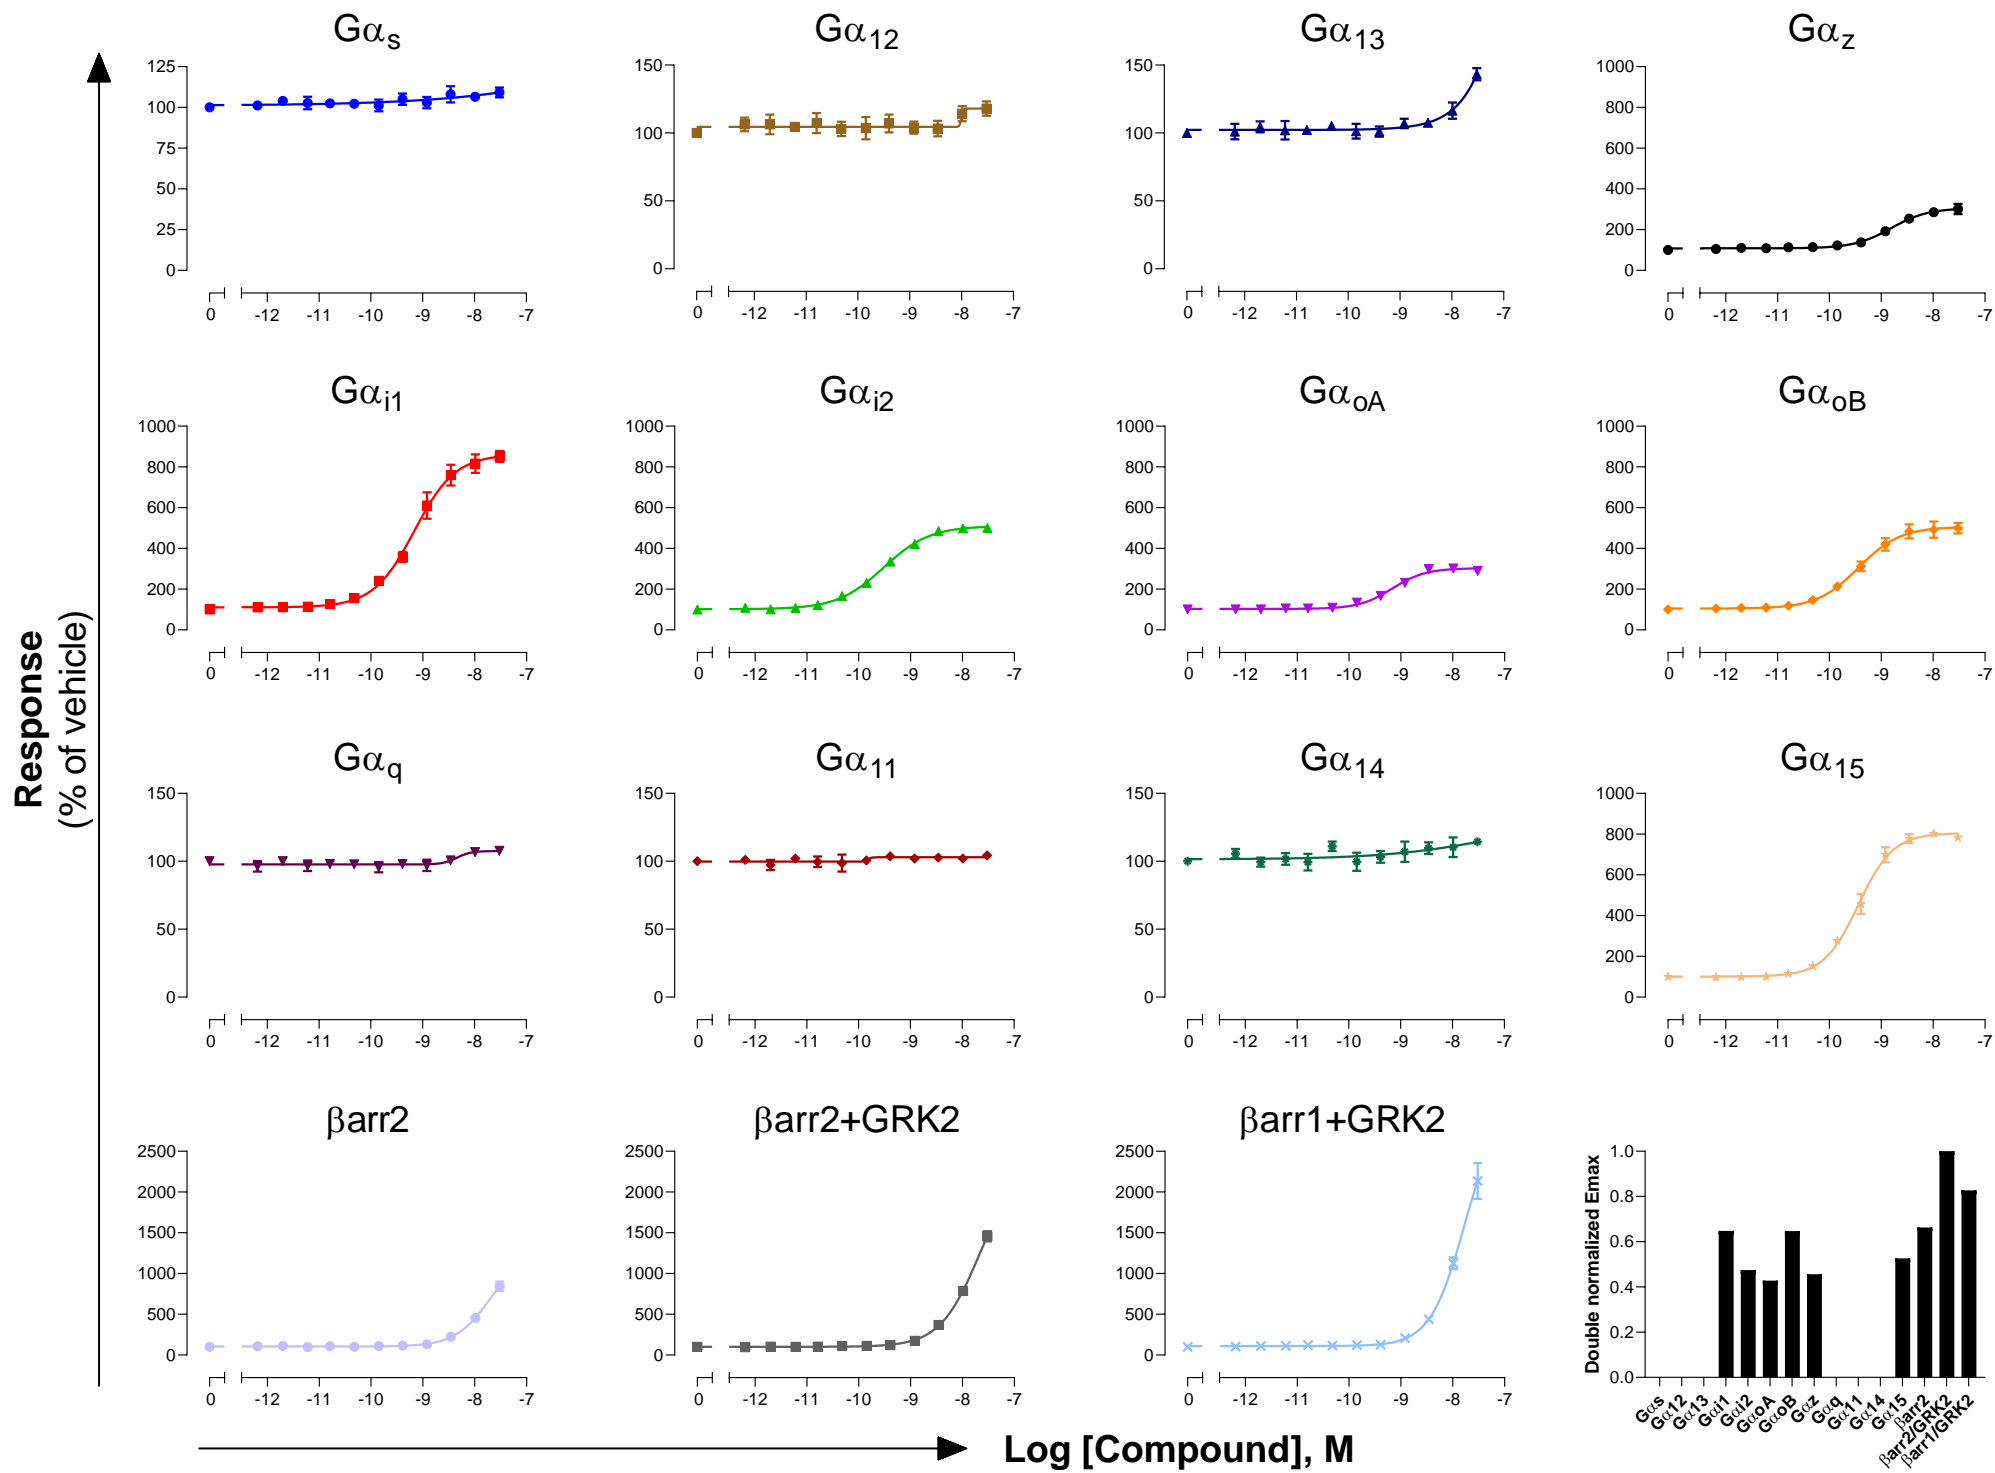



# GPCR: CB<sub>1</sub>

Ligand: WIN55,212-2

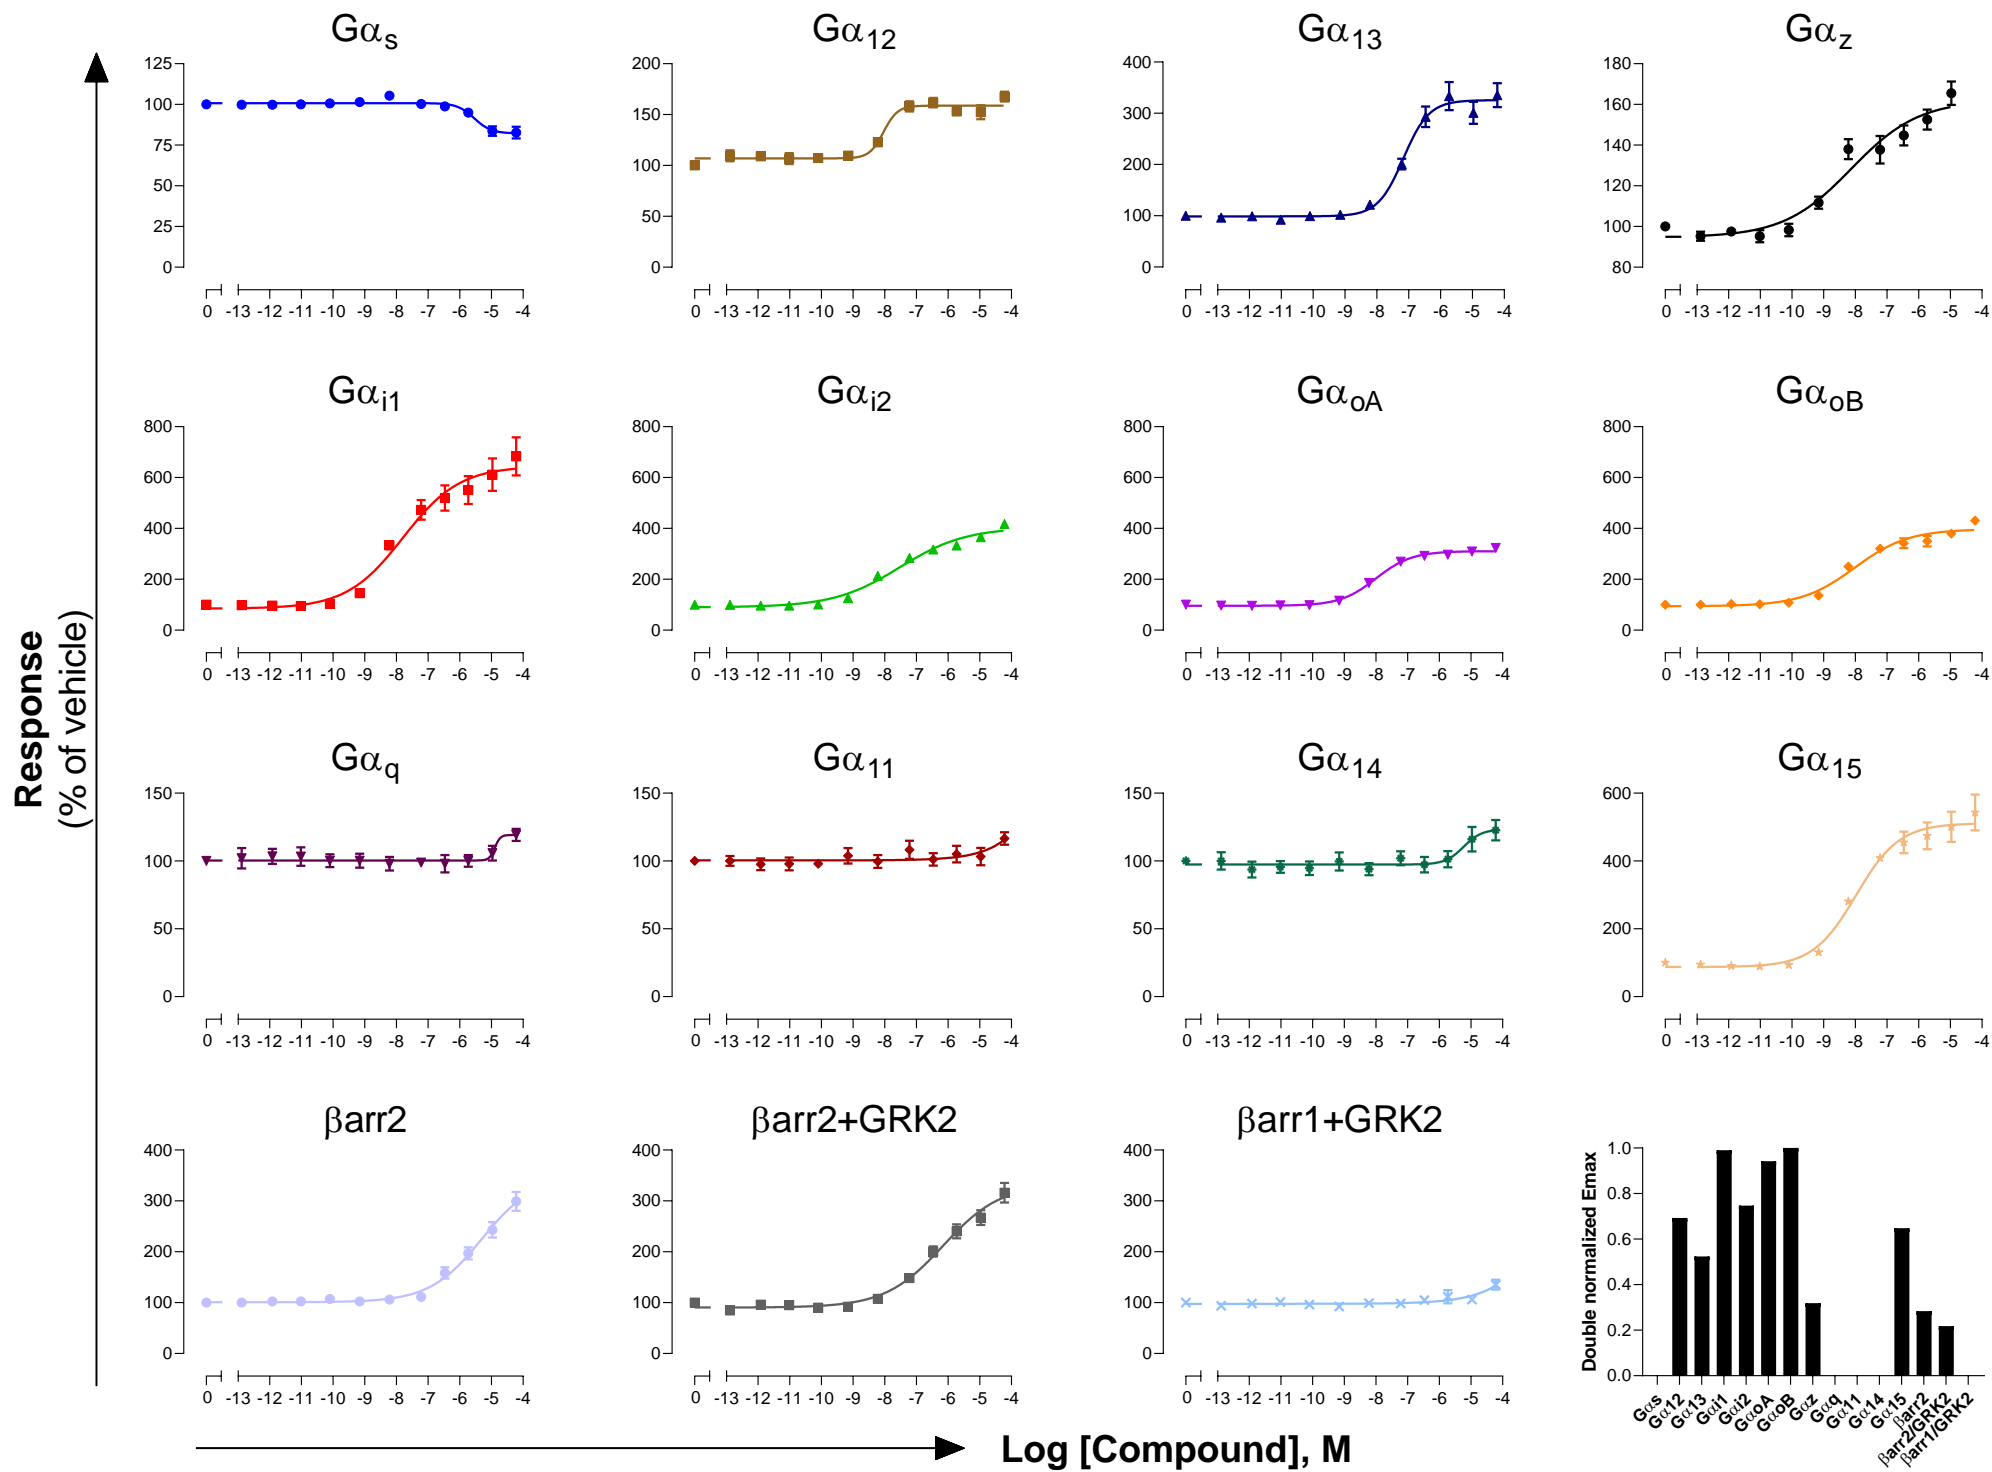

# GPCR: CB<sub>2</sub>

Ligand: WIN55,212-2

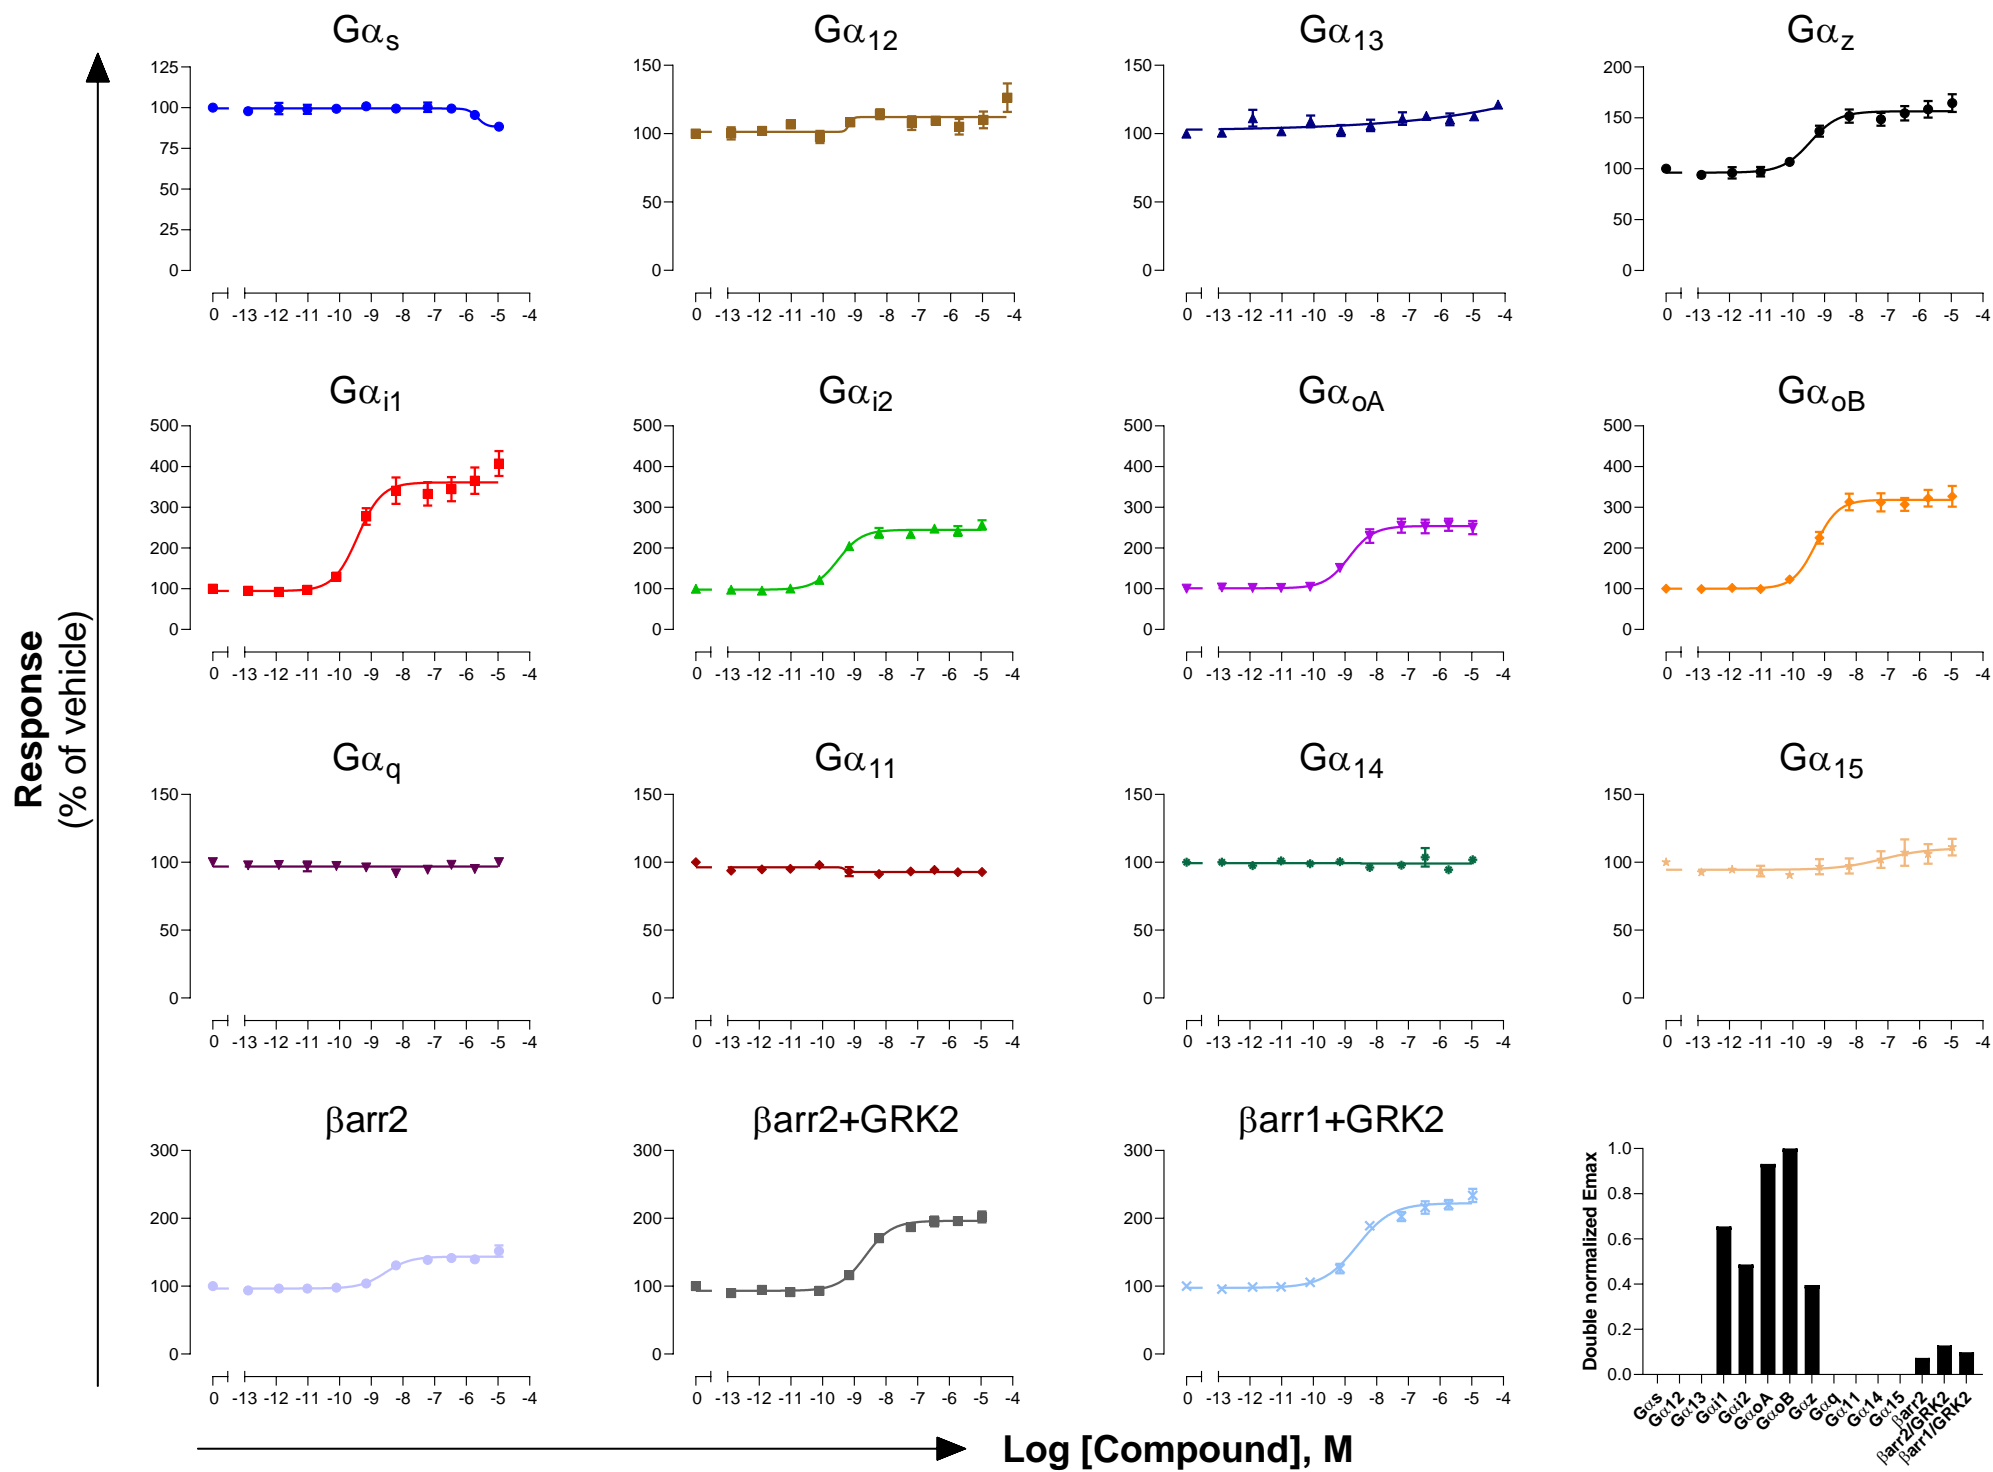

**GPCR: CCK<sub>1</sub>**  
**Ligand: CCK8**

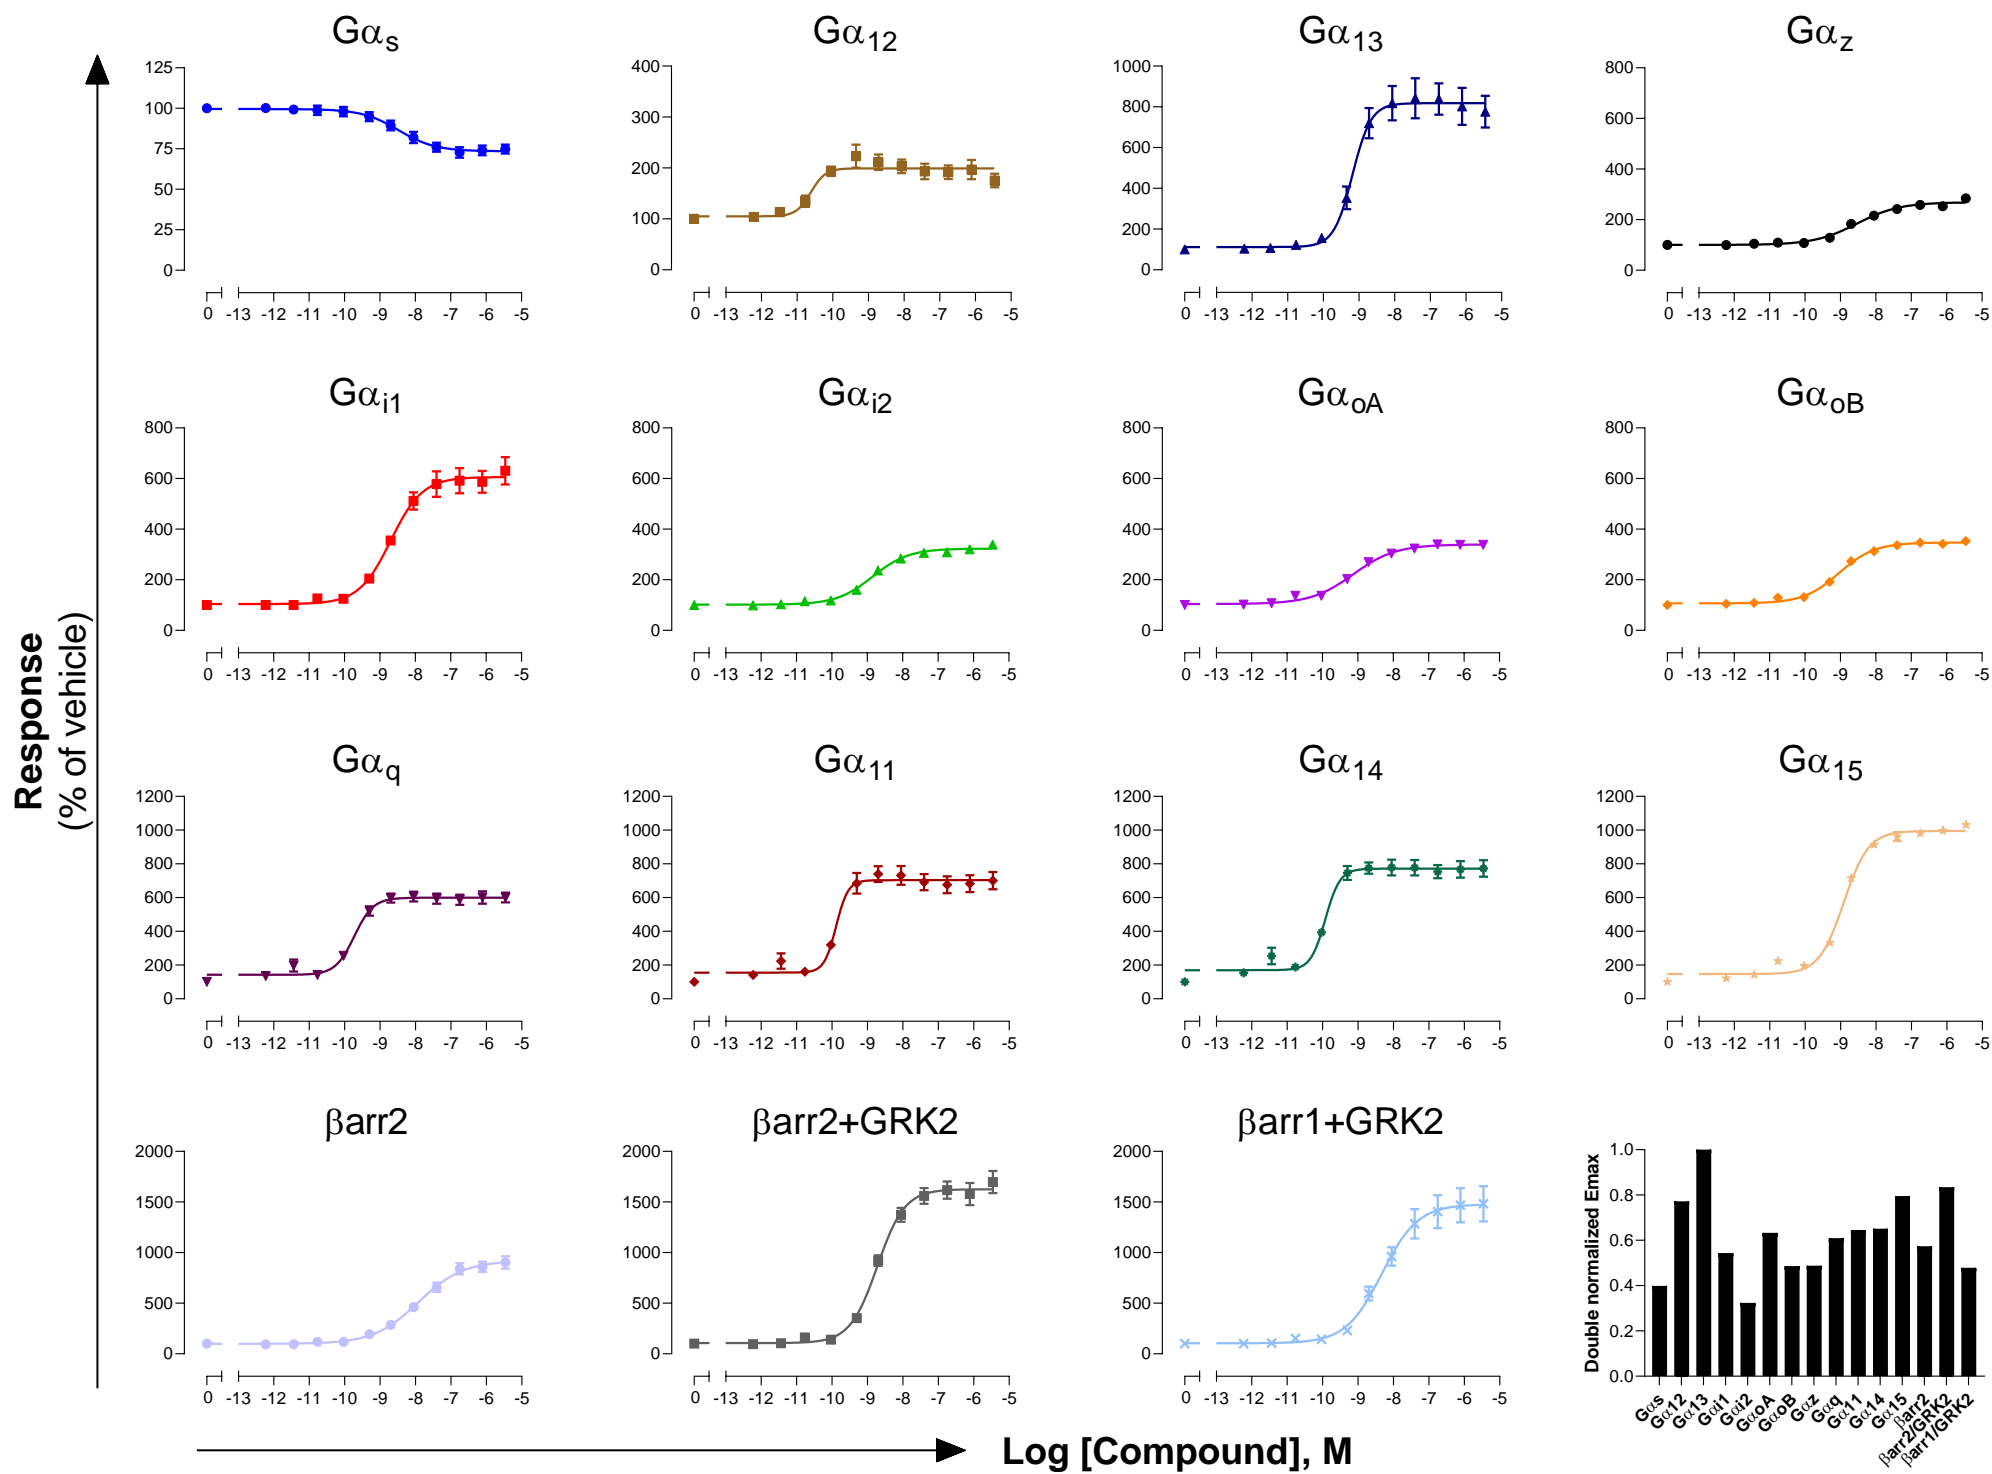

**GPCR: CCR5**  
**Ligand: CCL3**

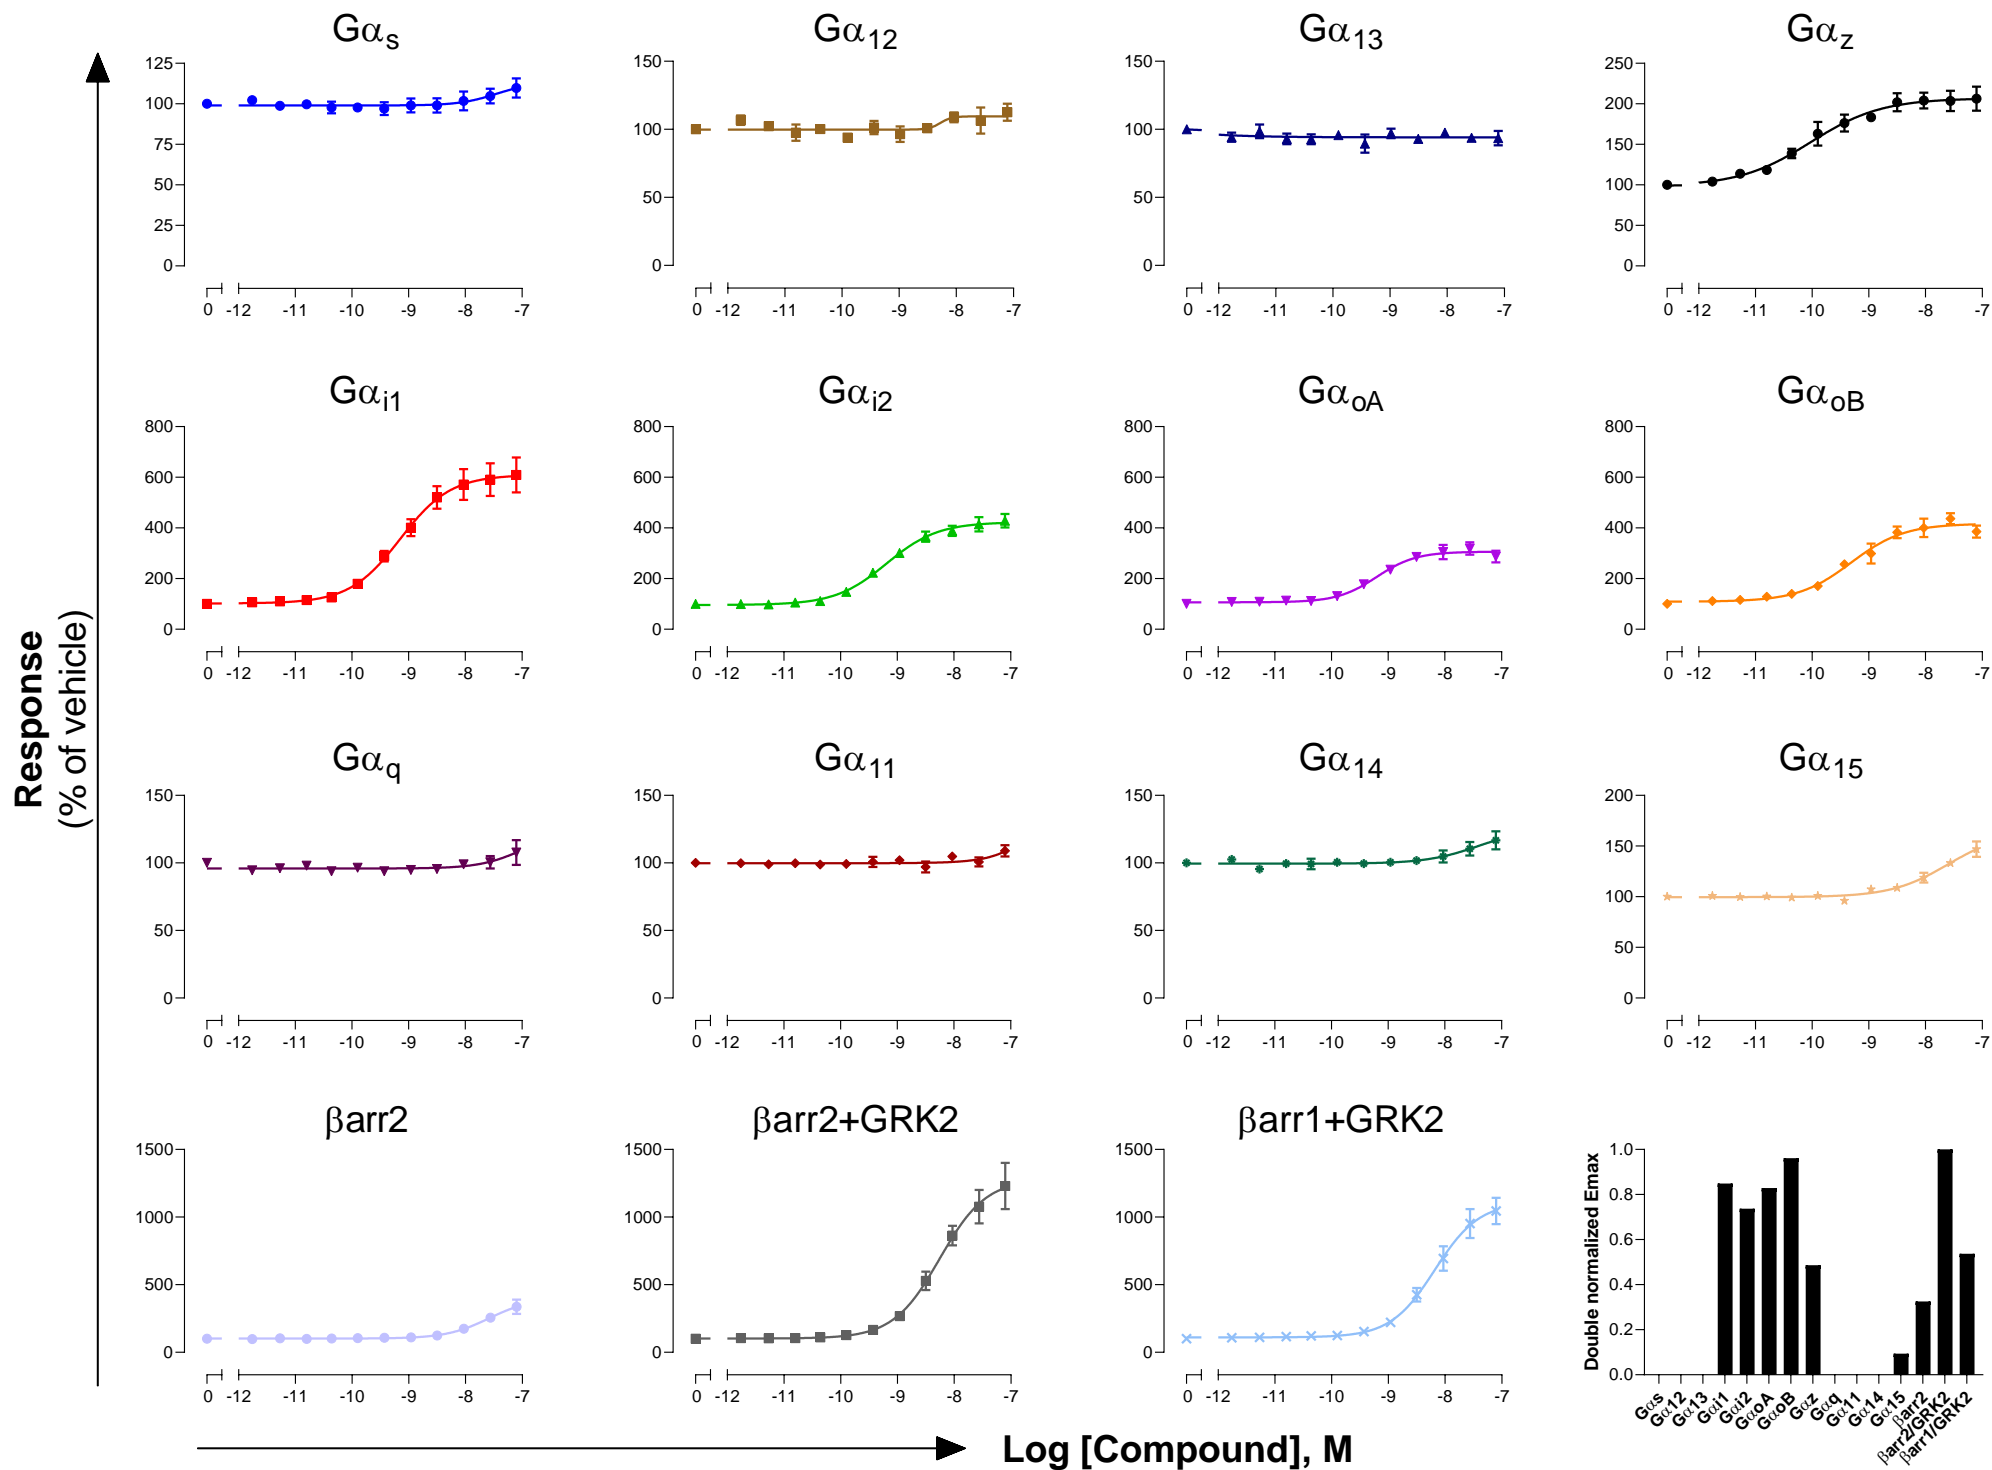

**GPCR: CCR6**  
**Ligand: CCL20**

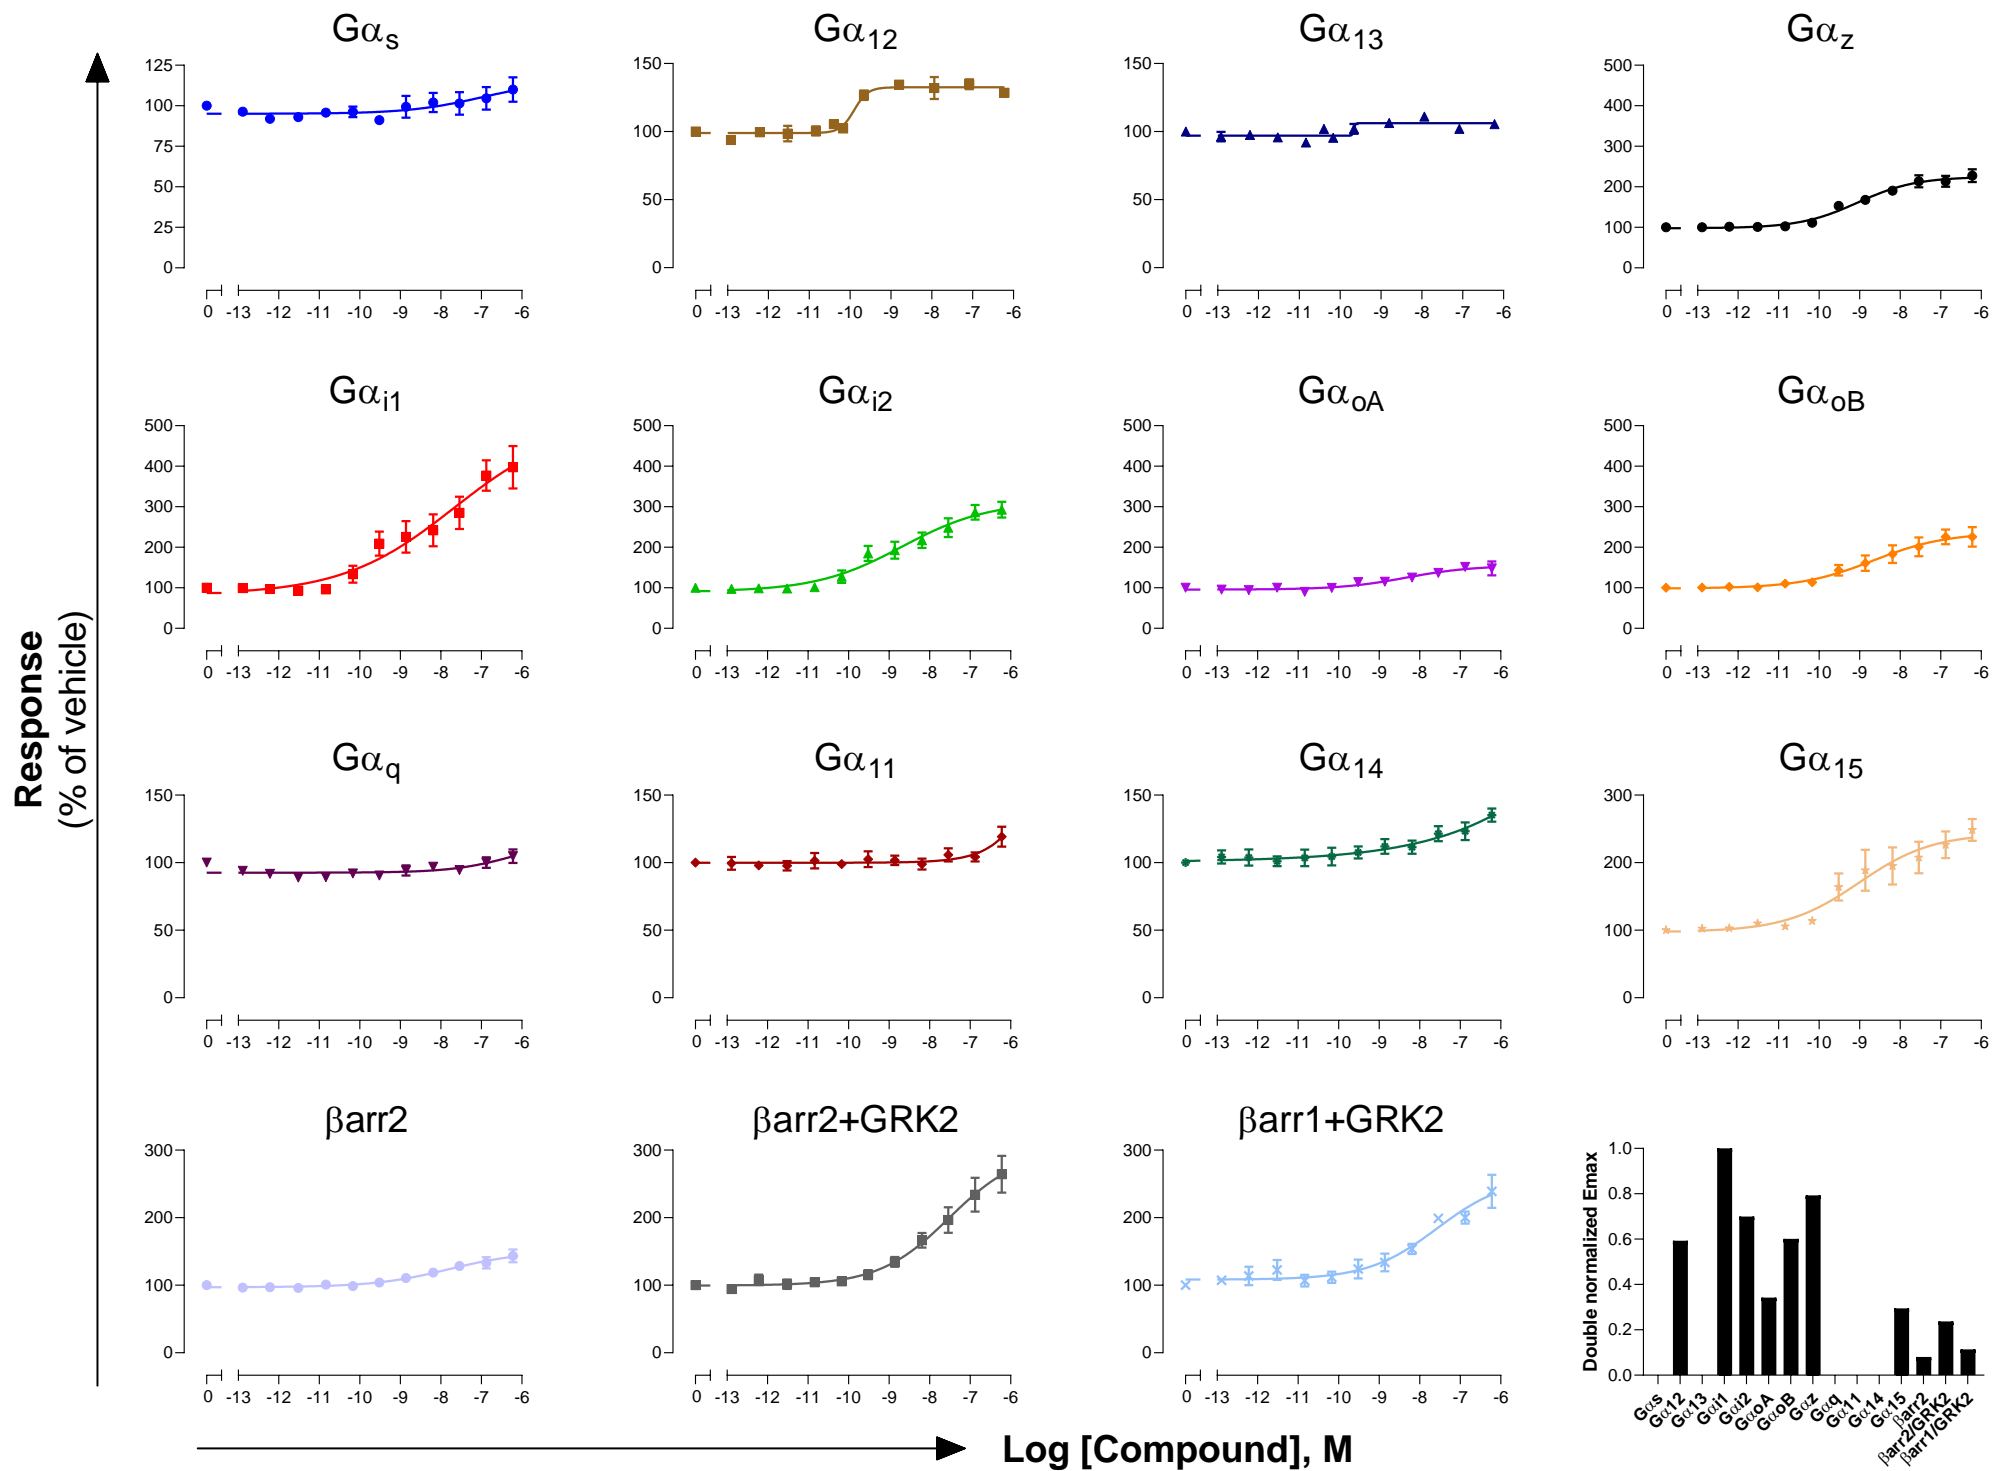

**GPCR: CRFR1**  
**Ligand: CRF**

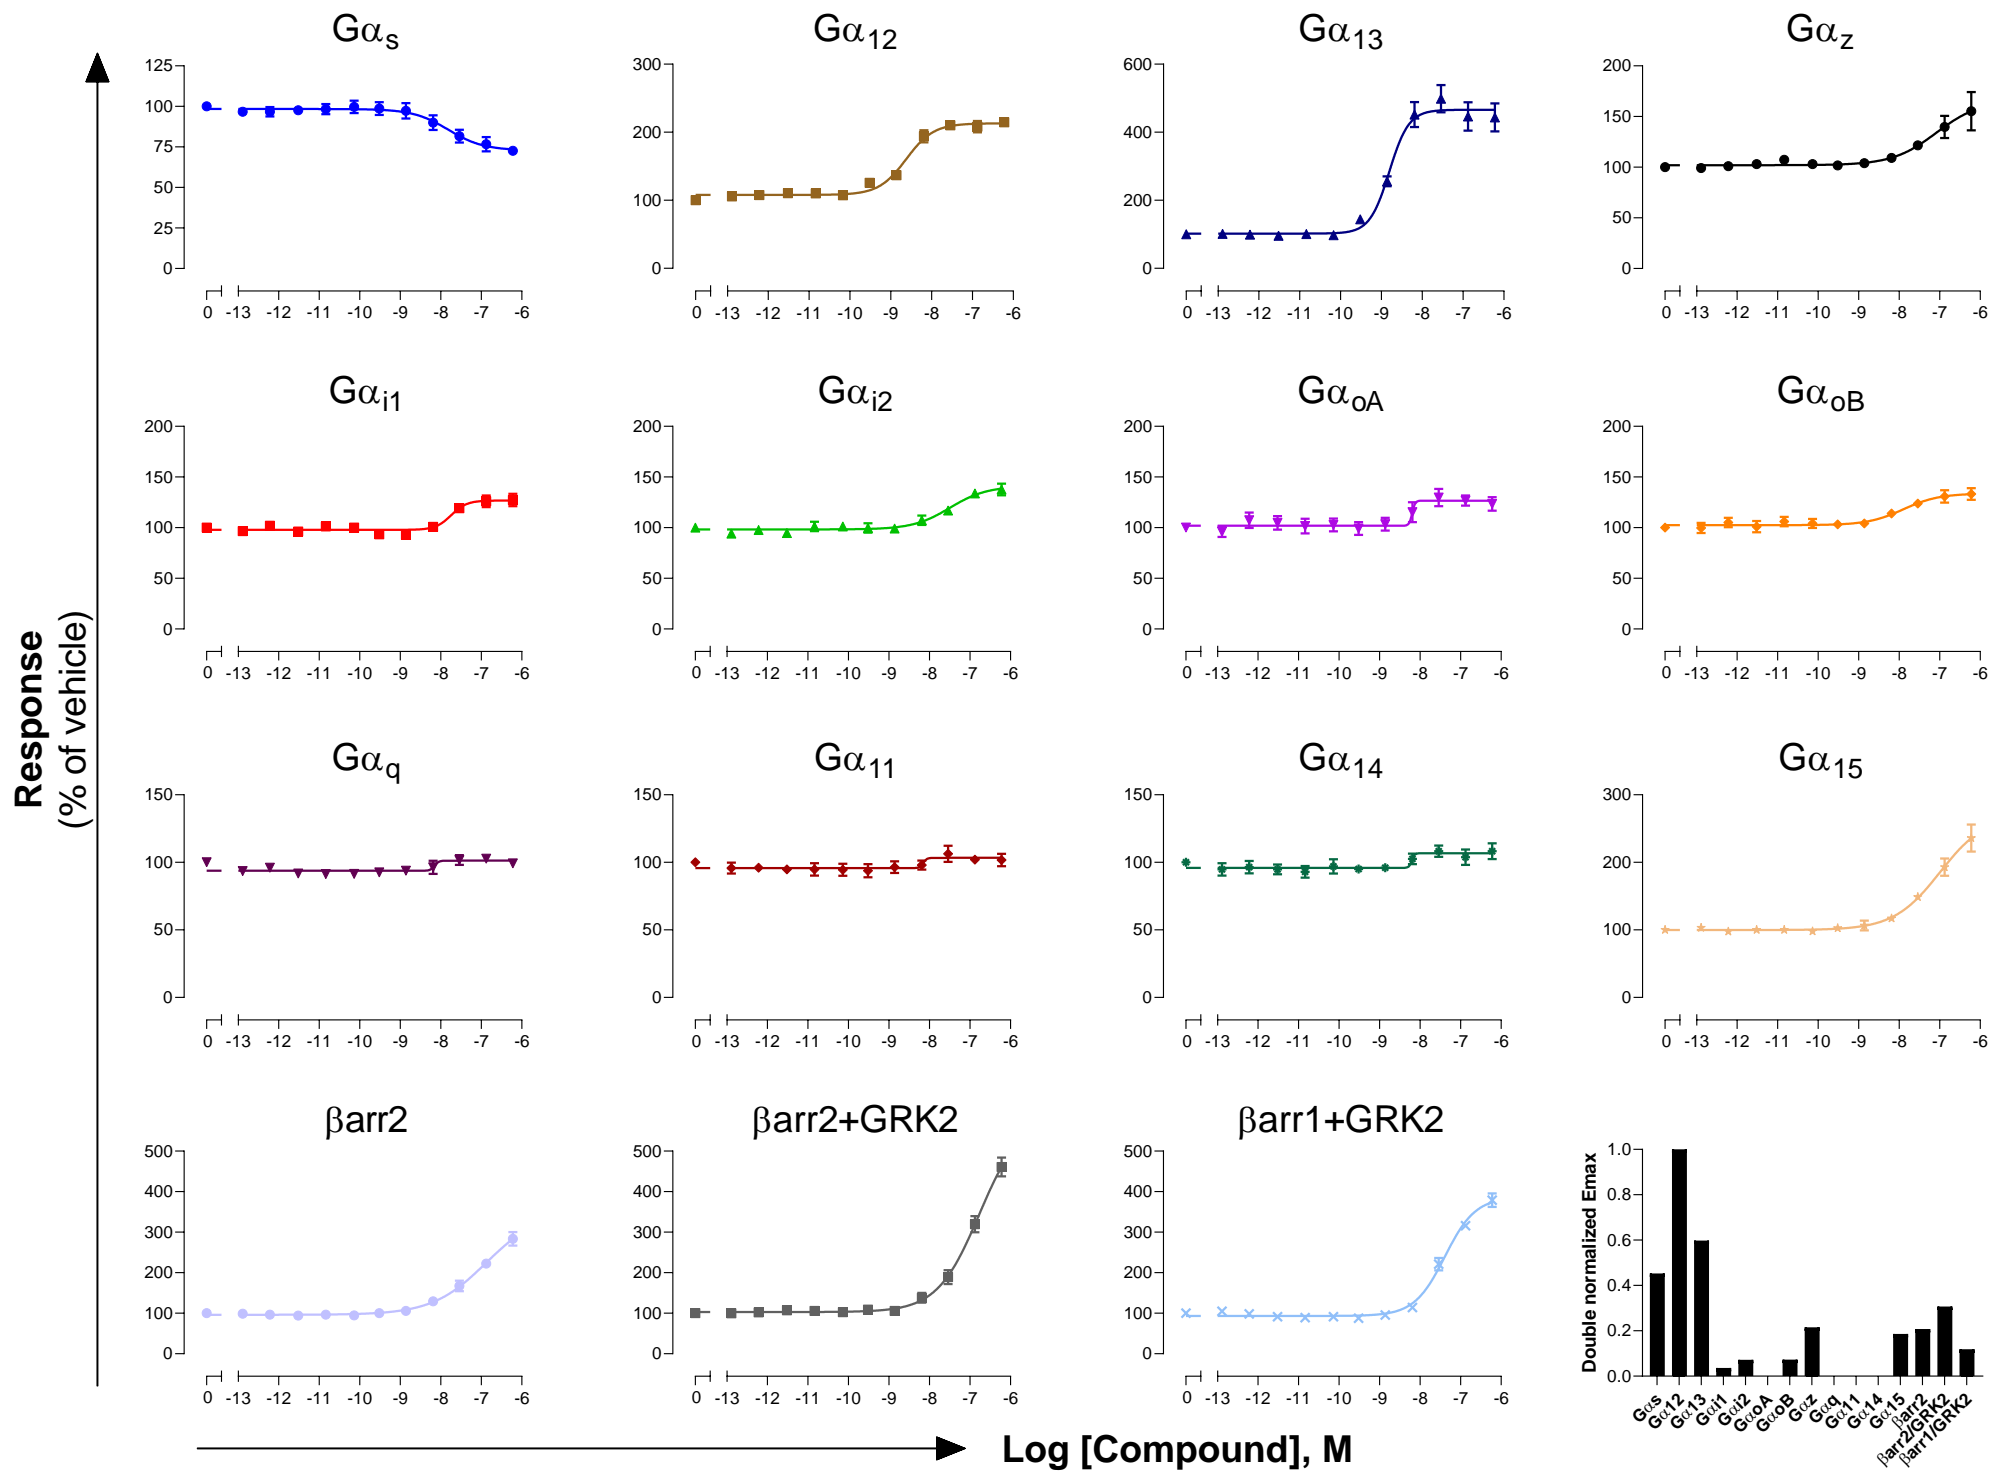

# GPCR: CRFR2

## Ligand: Urocortin II

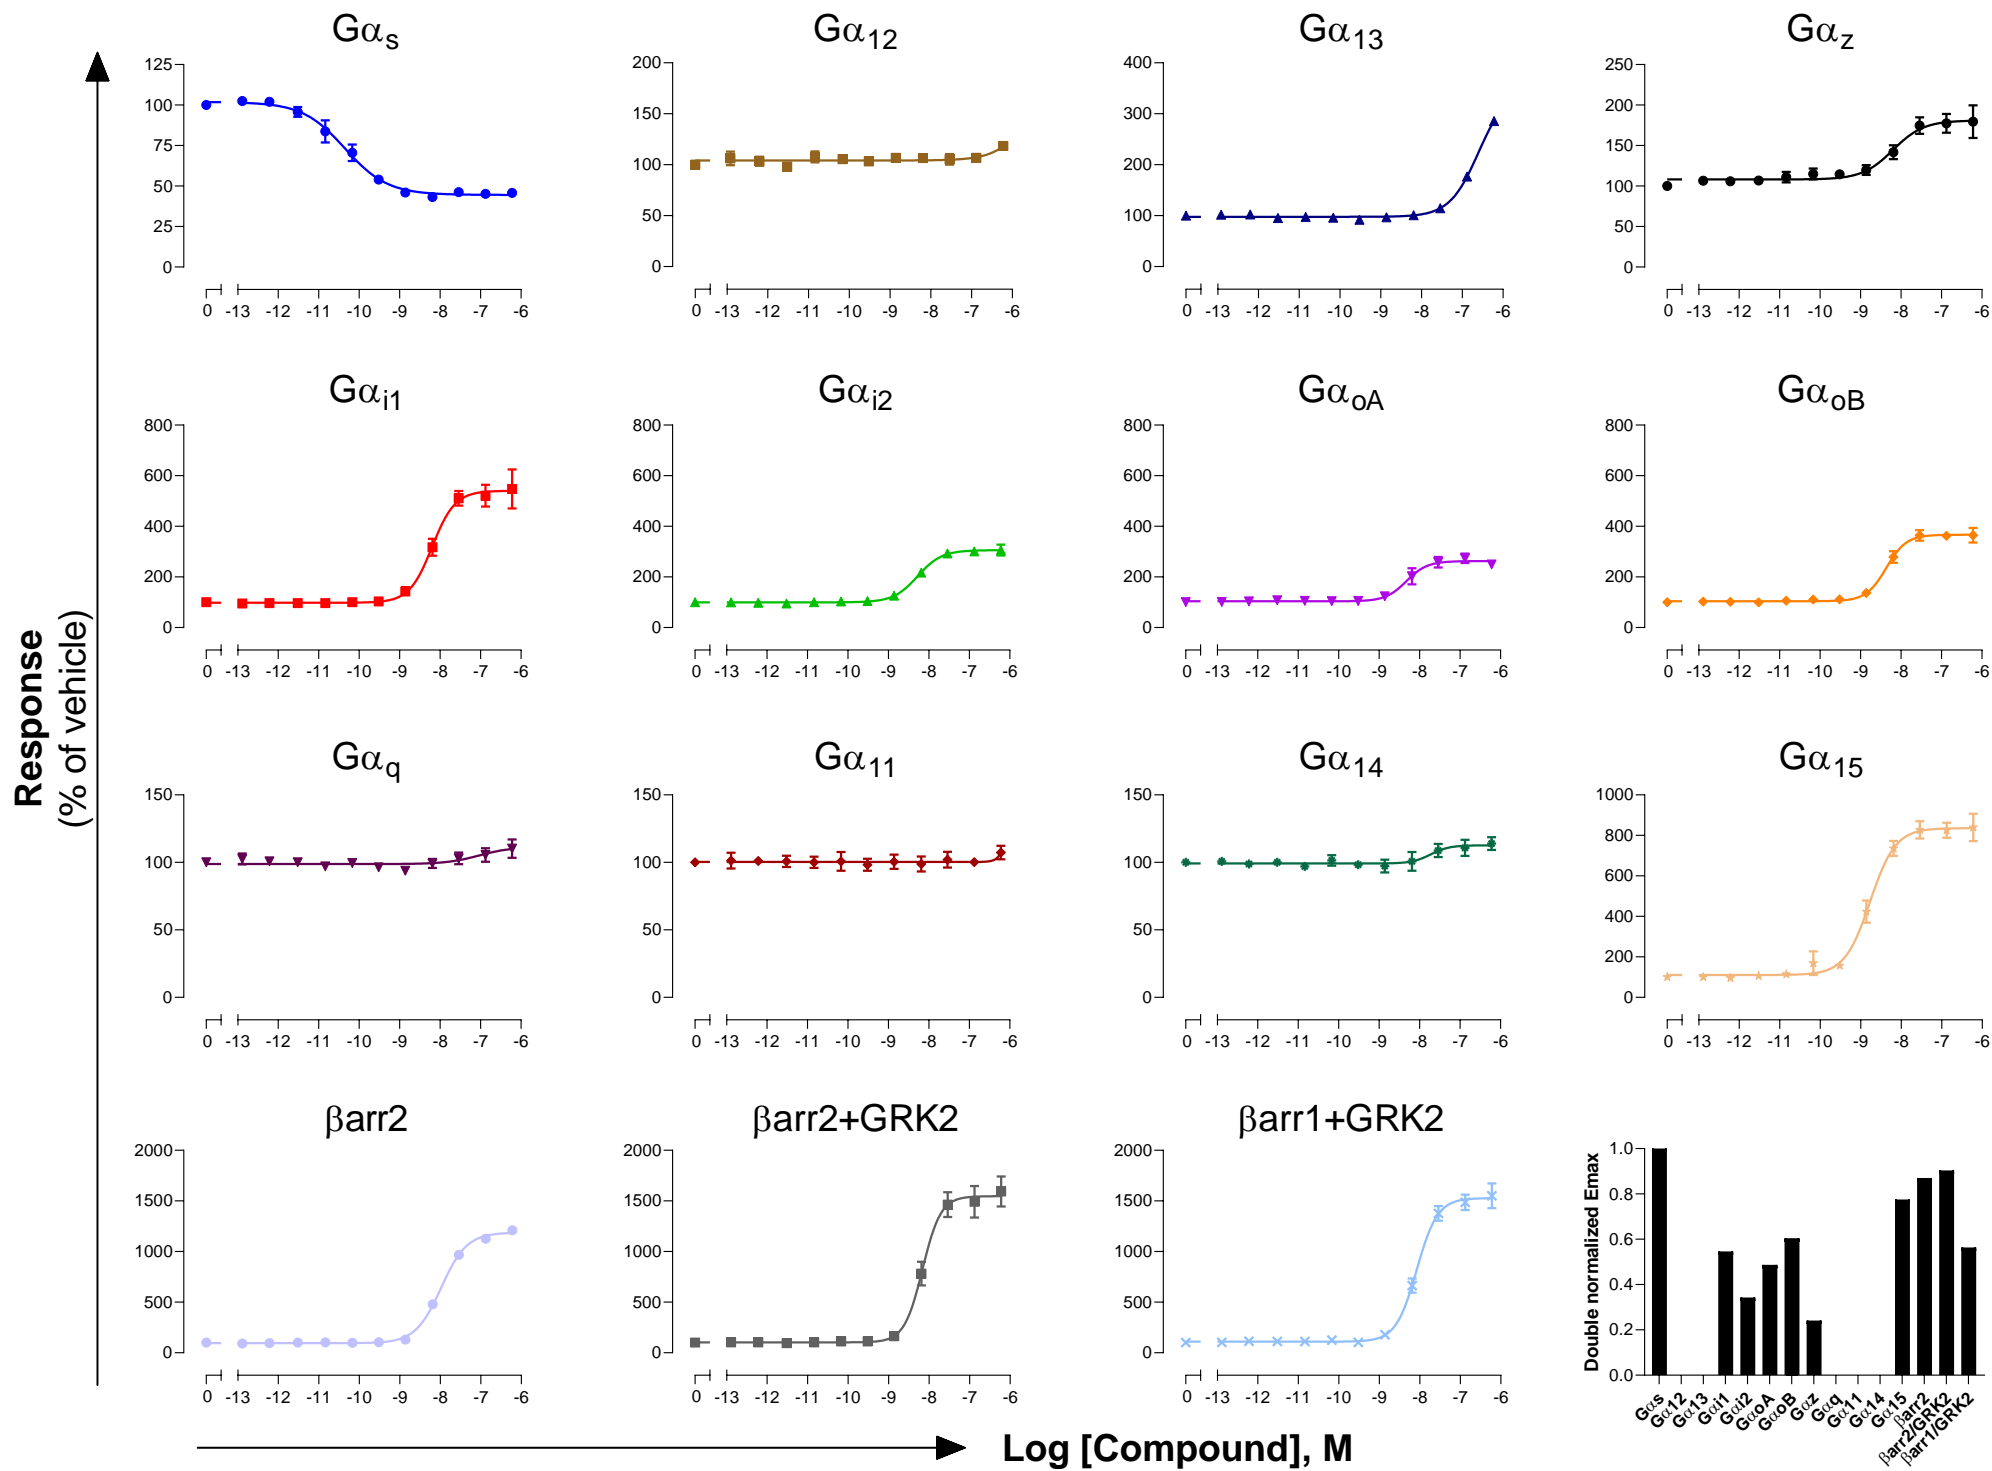

# GPCR: CTR

Ligand: Calcitonin

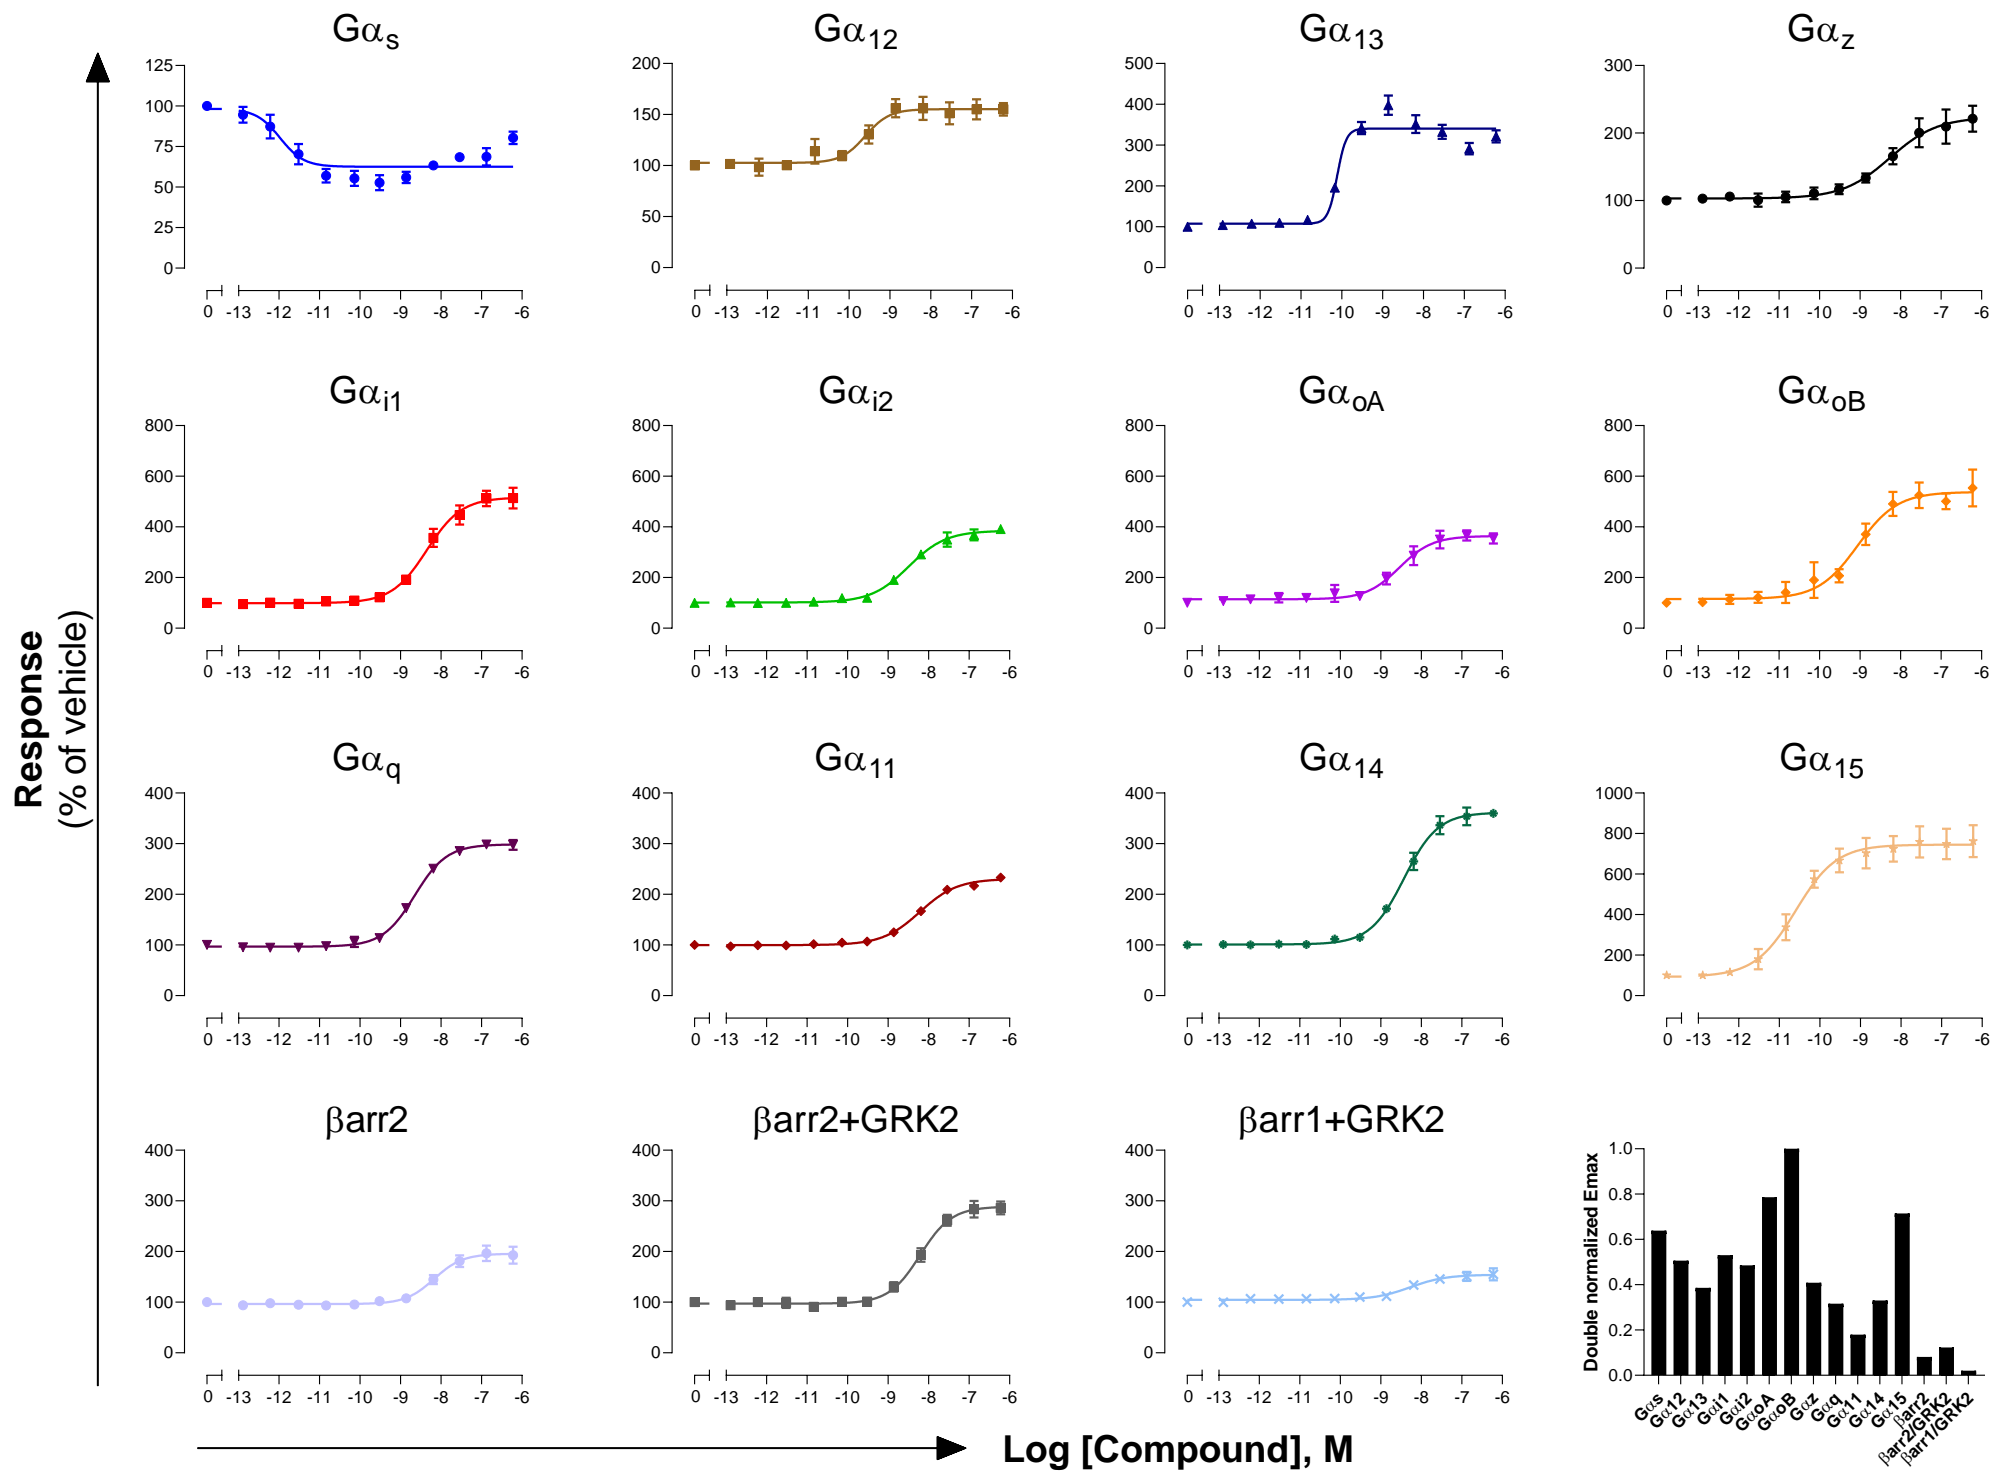



**GPCR: CXCR2**  
**Ligand: CXCL8**

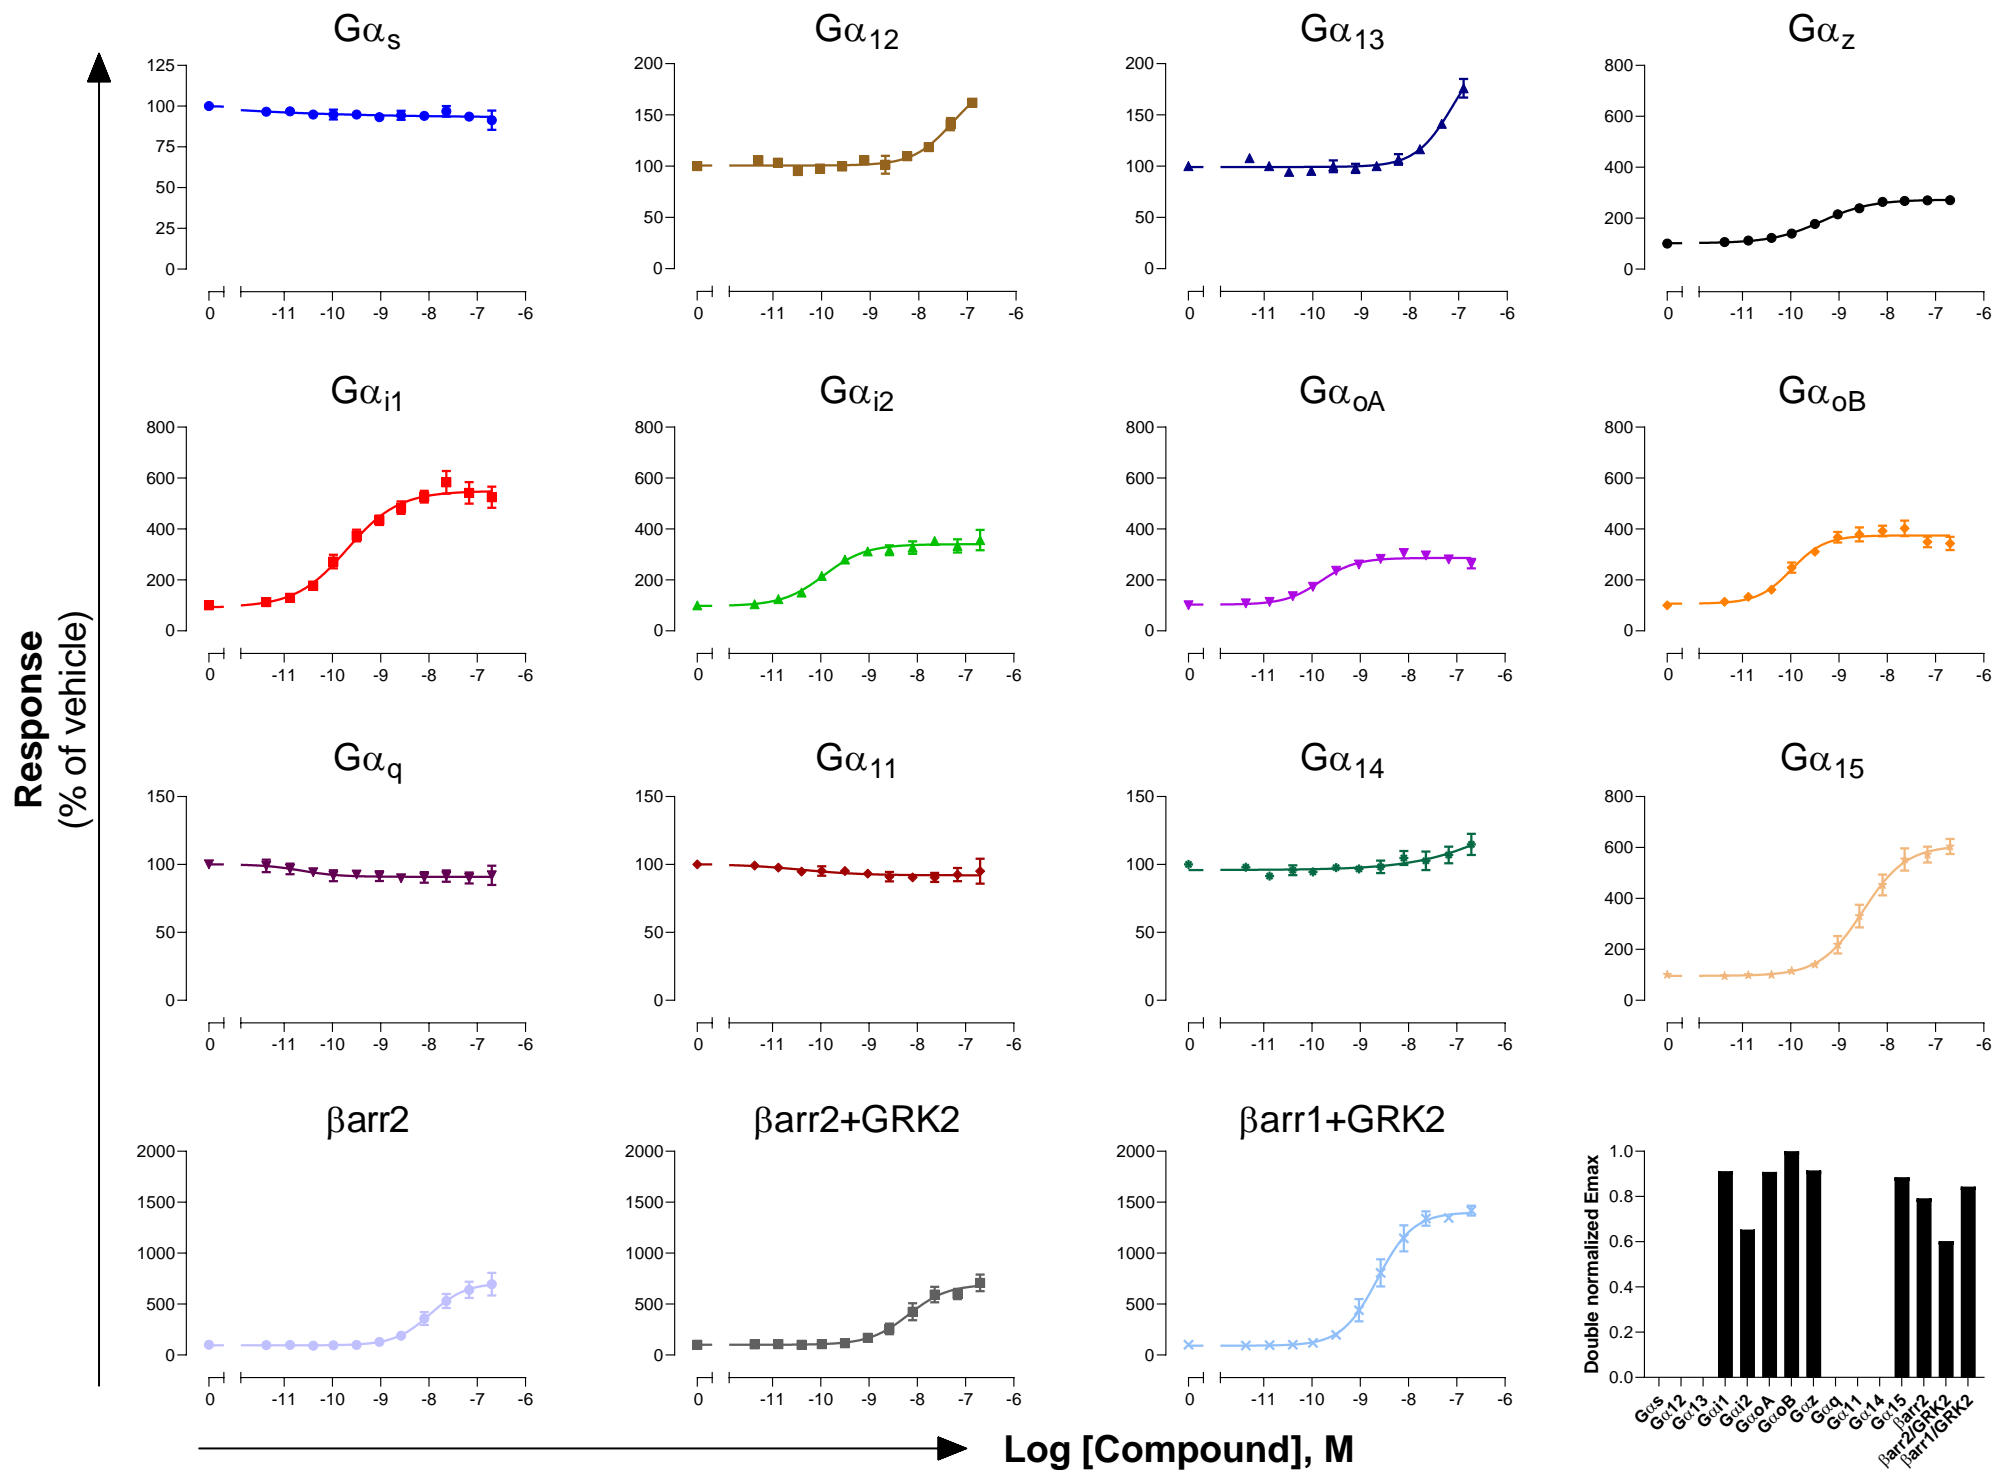

**GPCR: CXCR4**  
**Ligand: CXCL12**

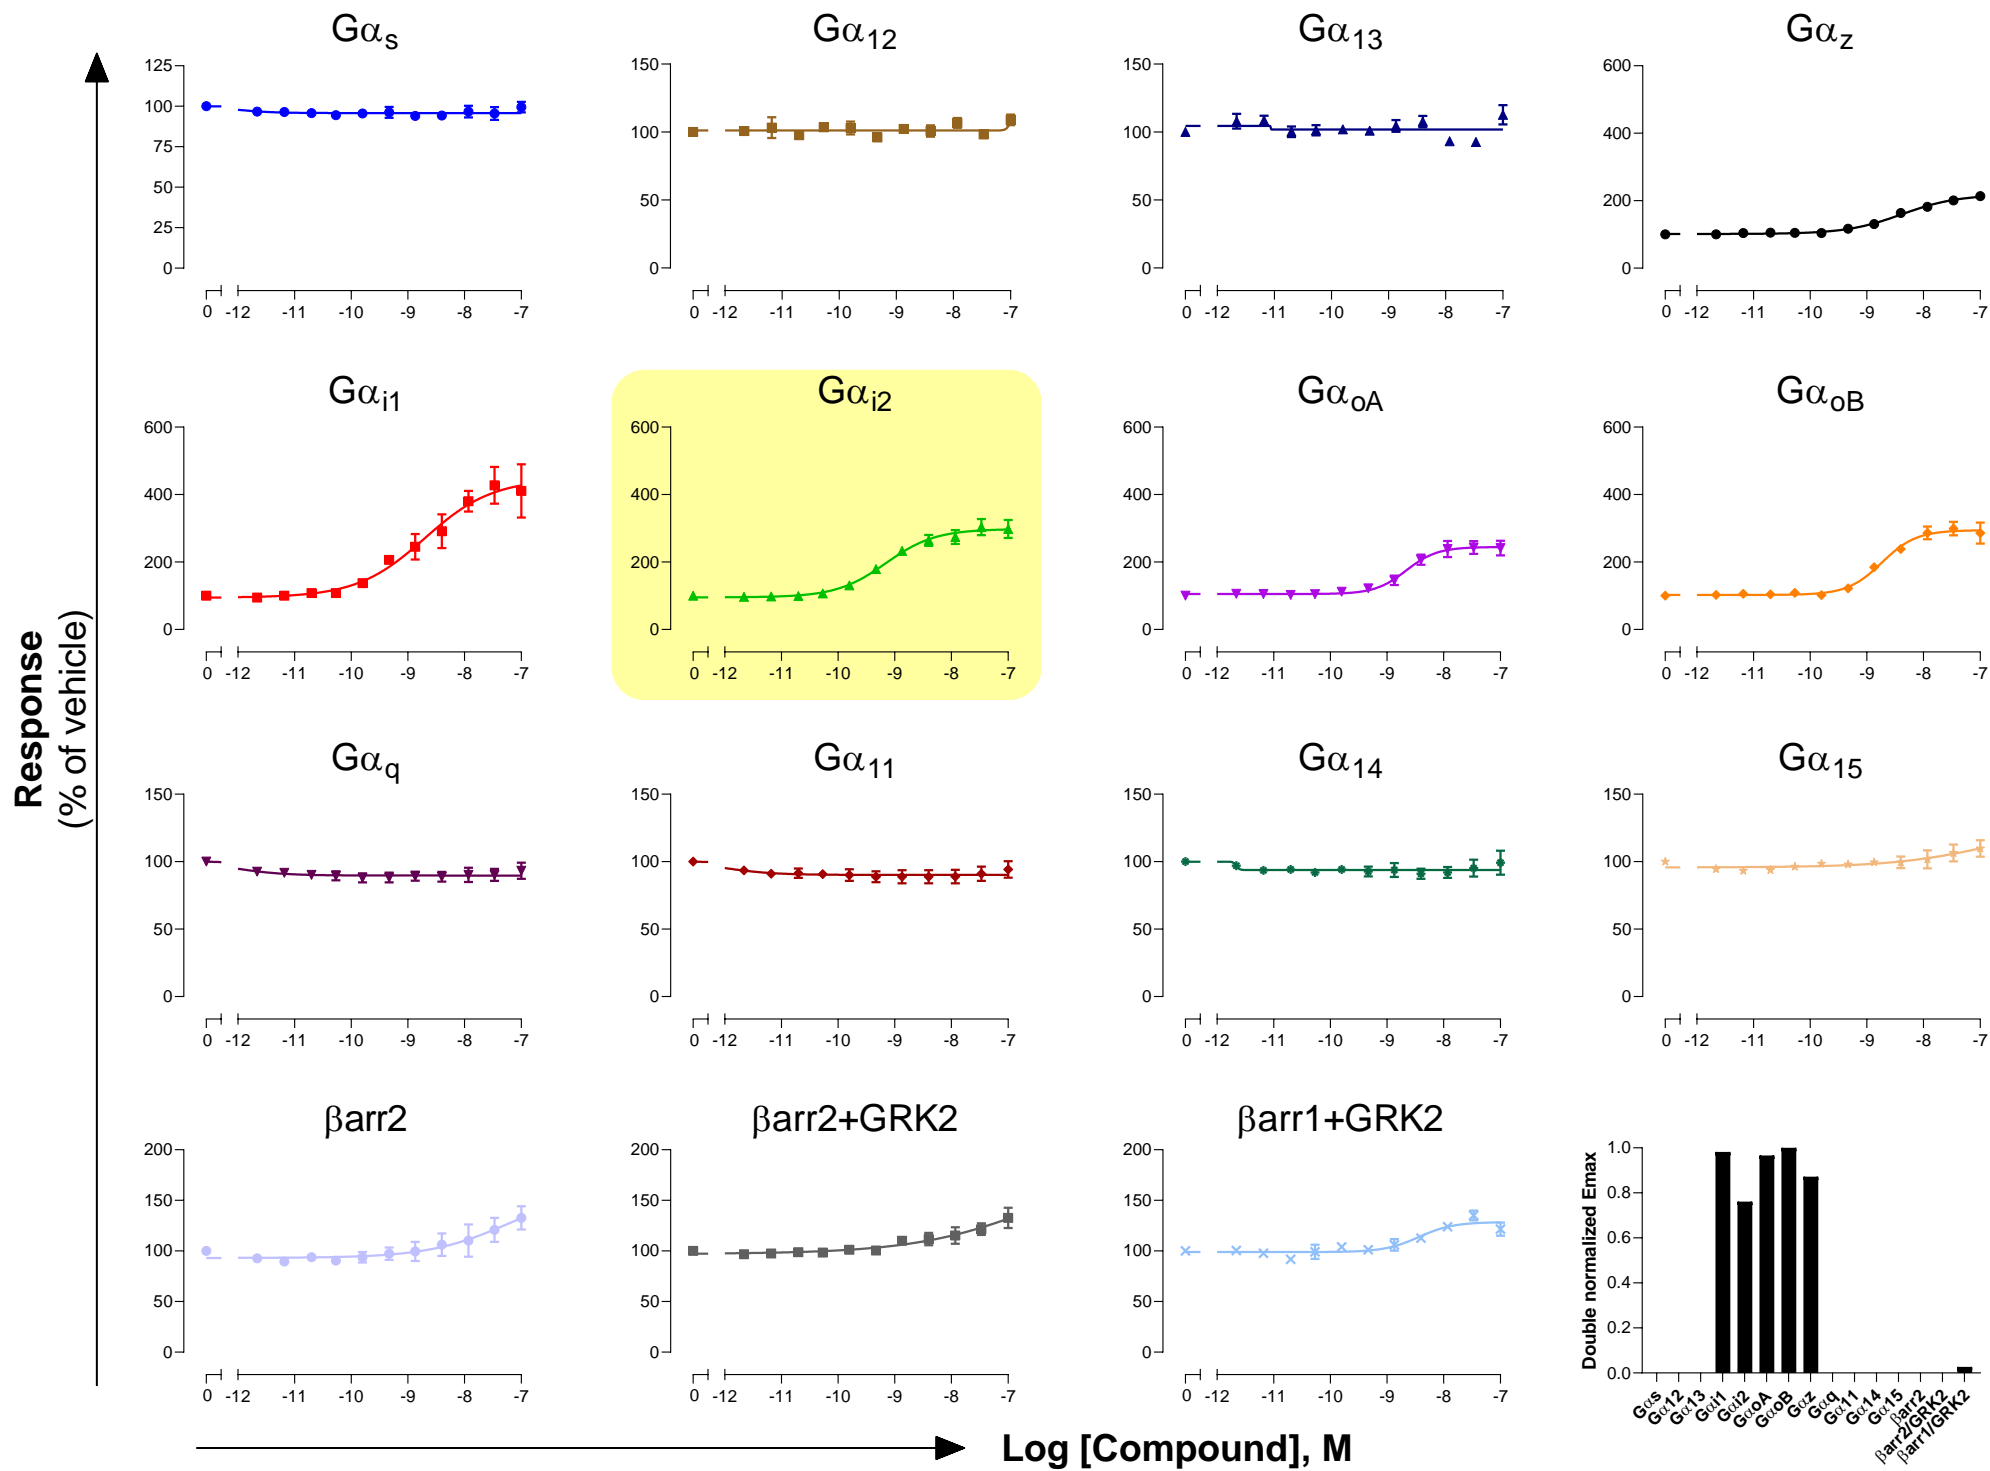

**GPCR: CXCR5**  
**Ligand: CXCL13**

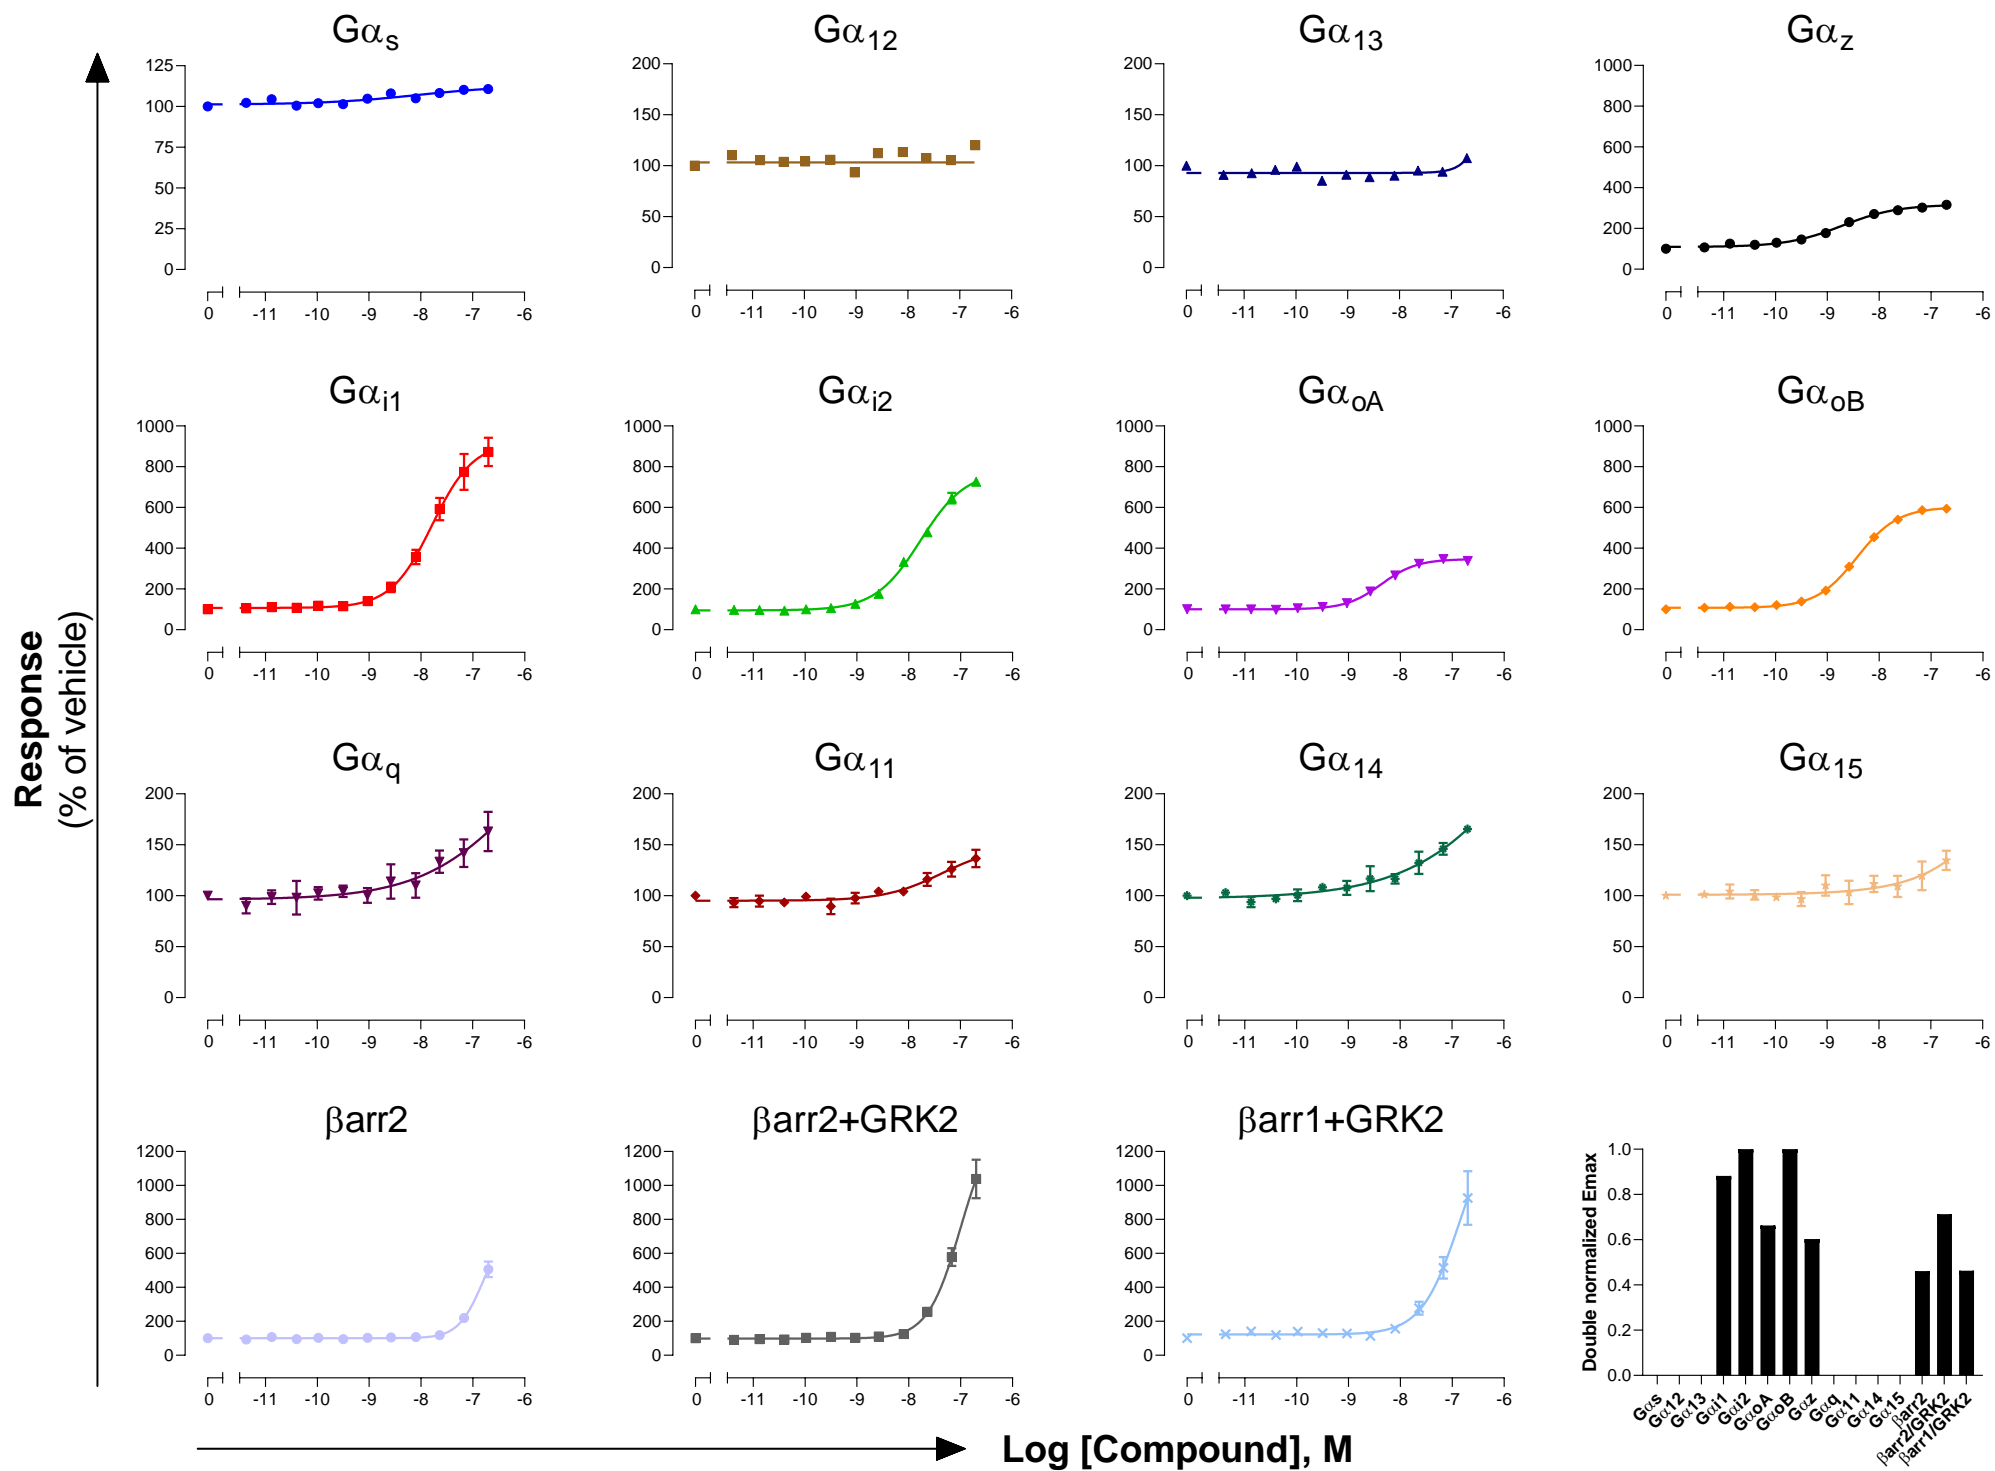

# GPCR: CysLT<sub>1</sub>

Ligand: LTD4

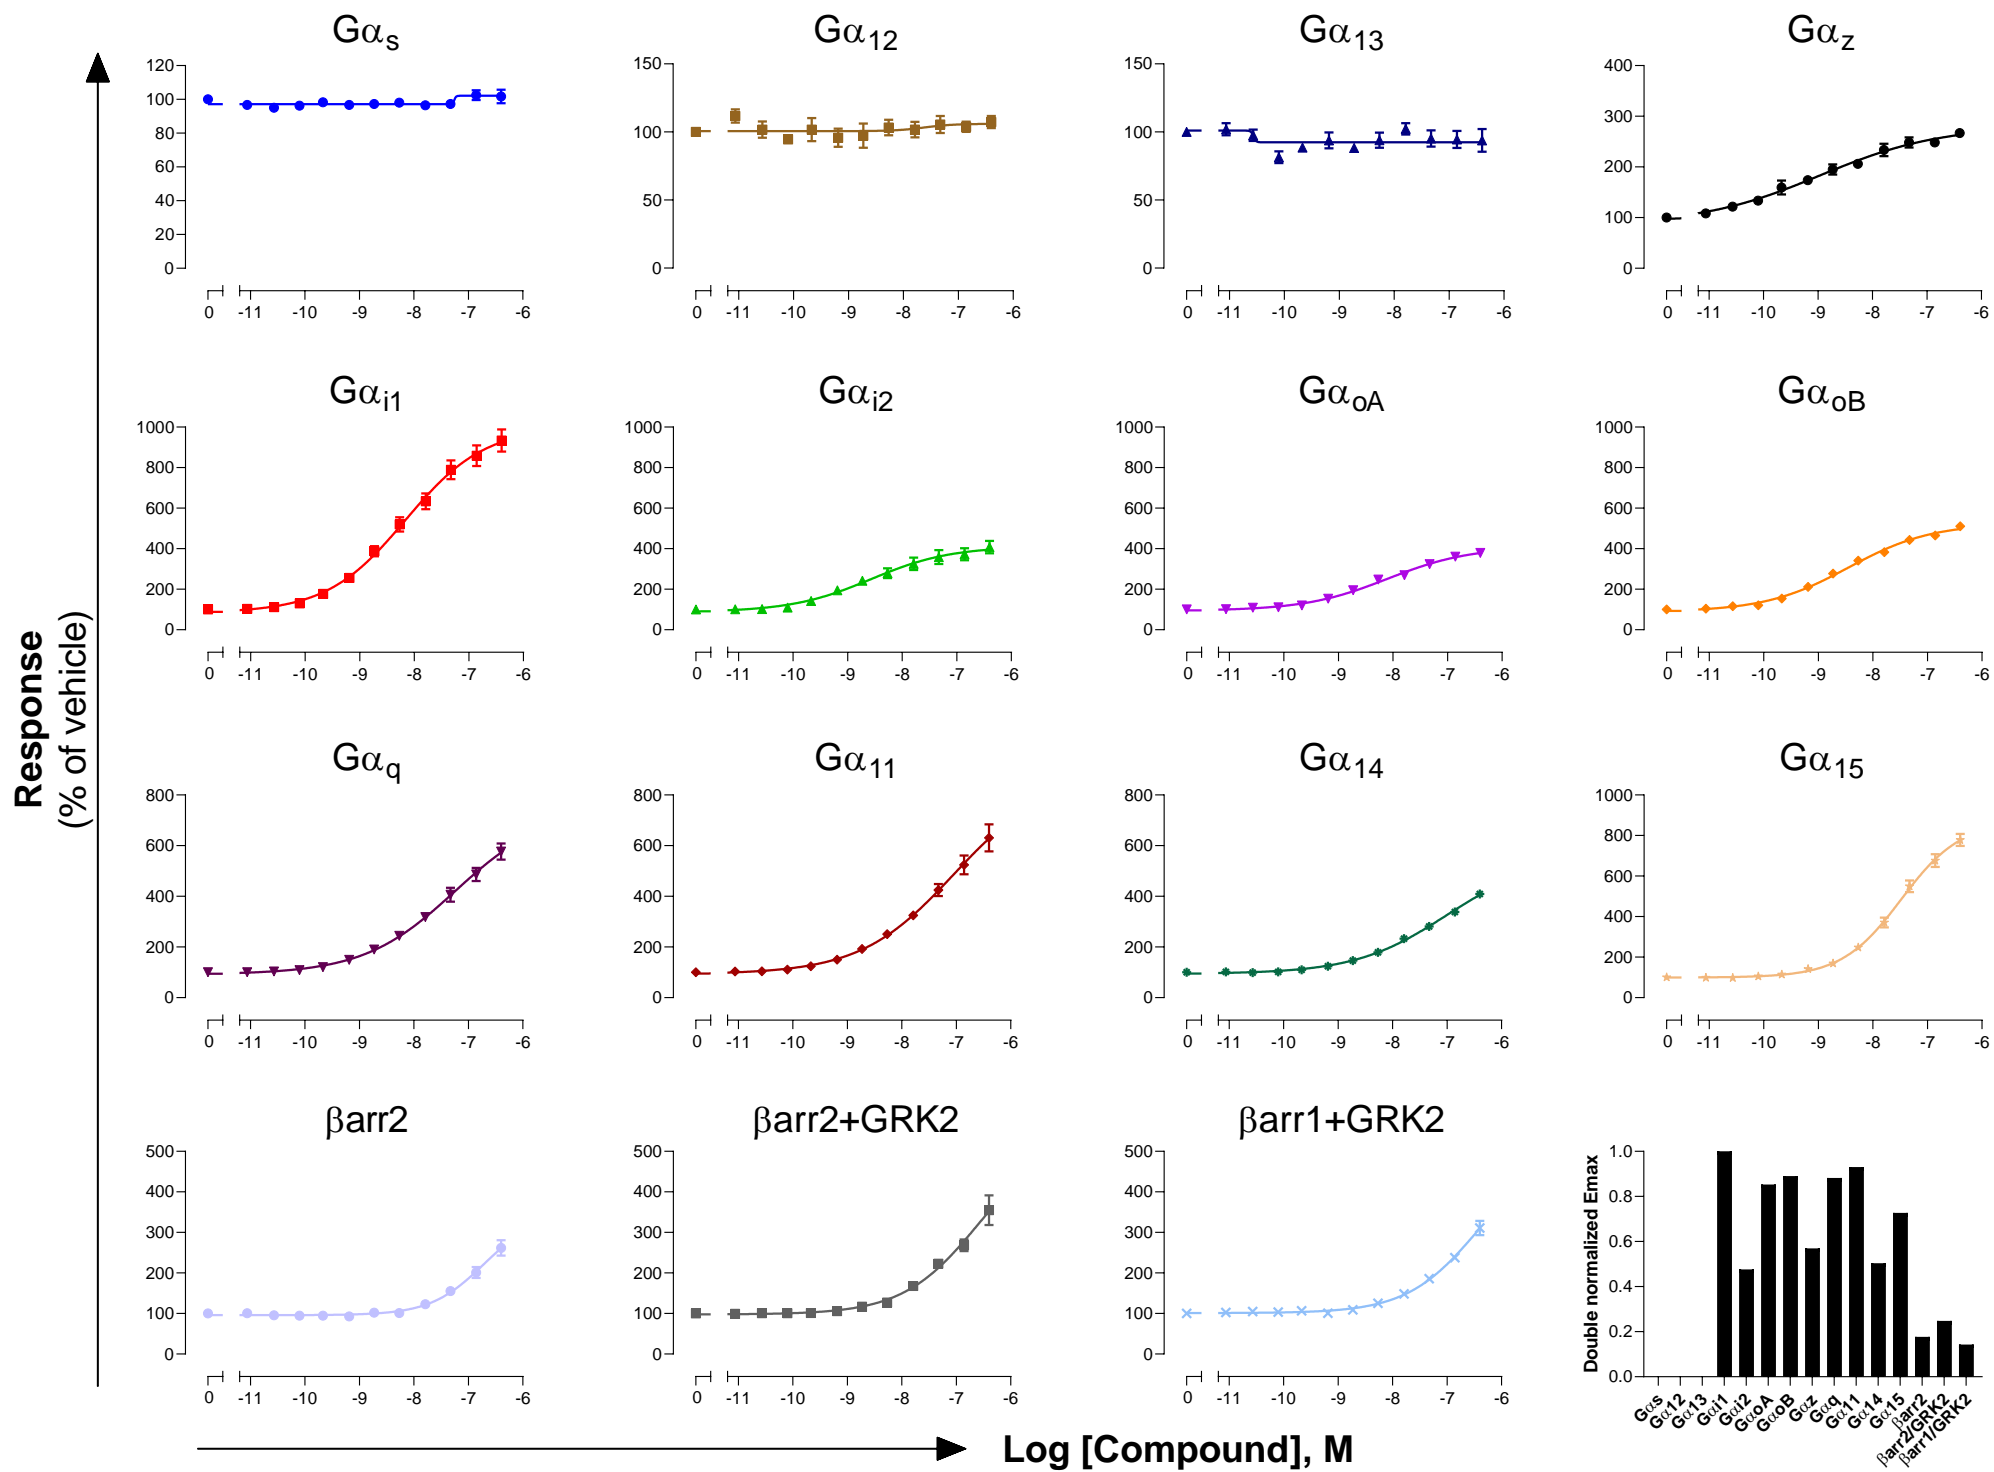

# GPCR: CysLT<sub>2</sub>

Ligand: LTD4

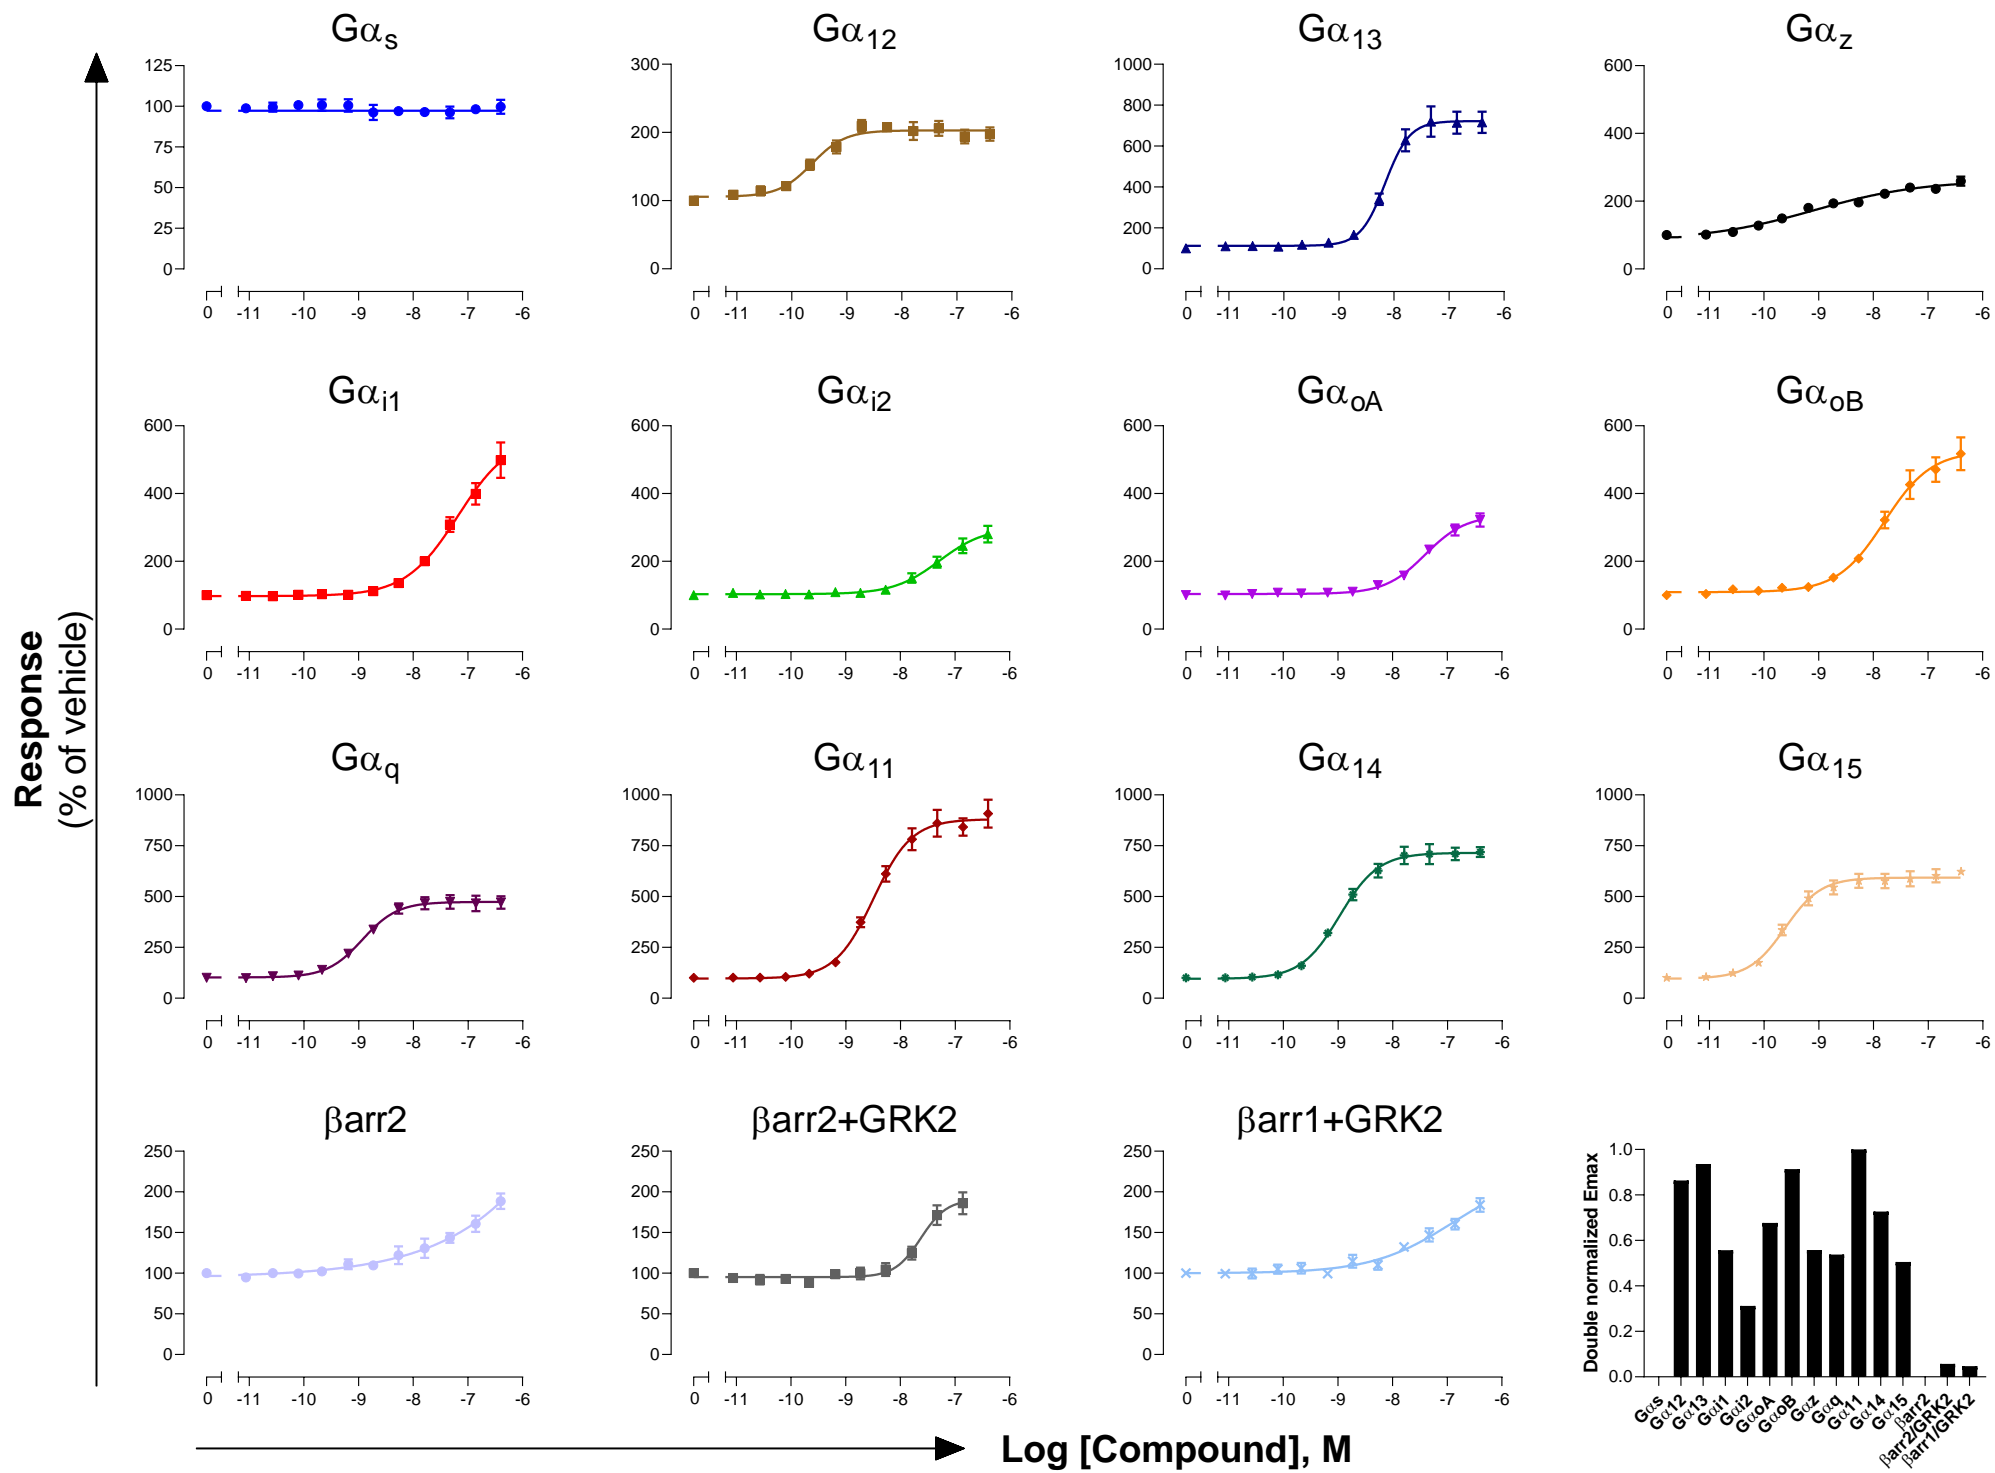

# GPCR: D<sub>1</sub>

Ligand: Dopamine

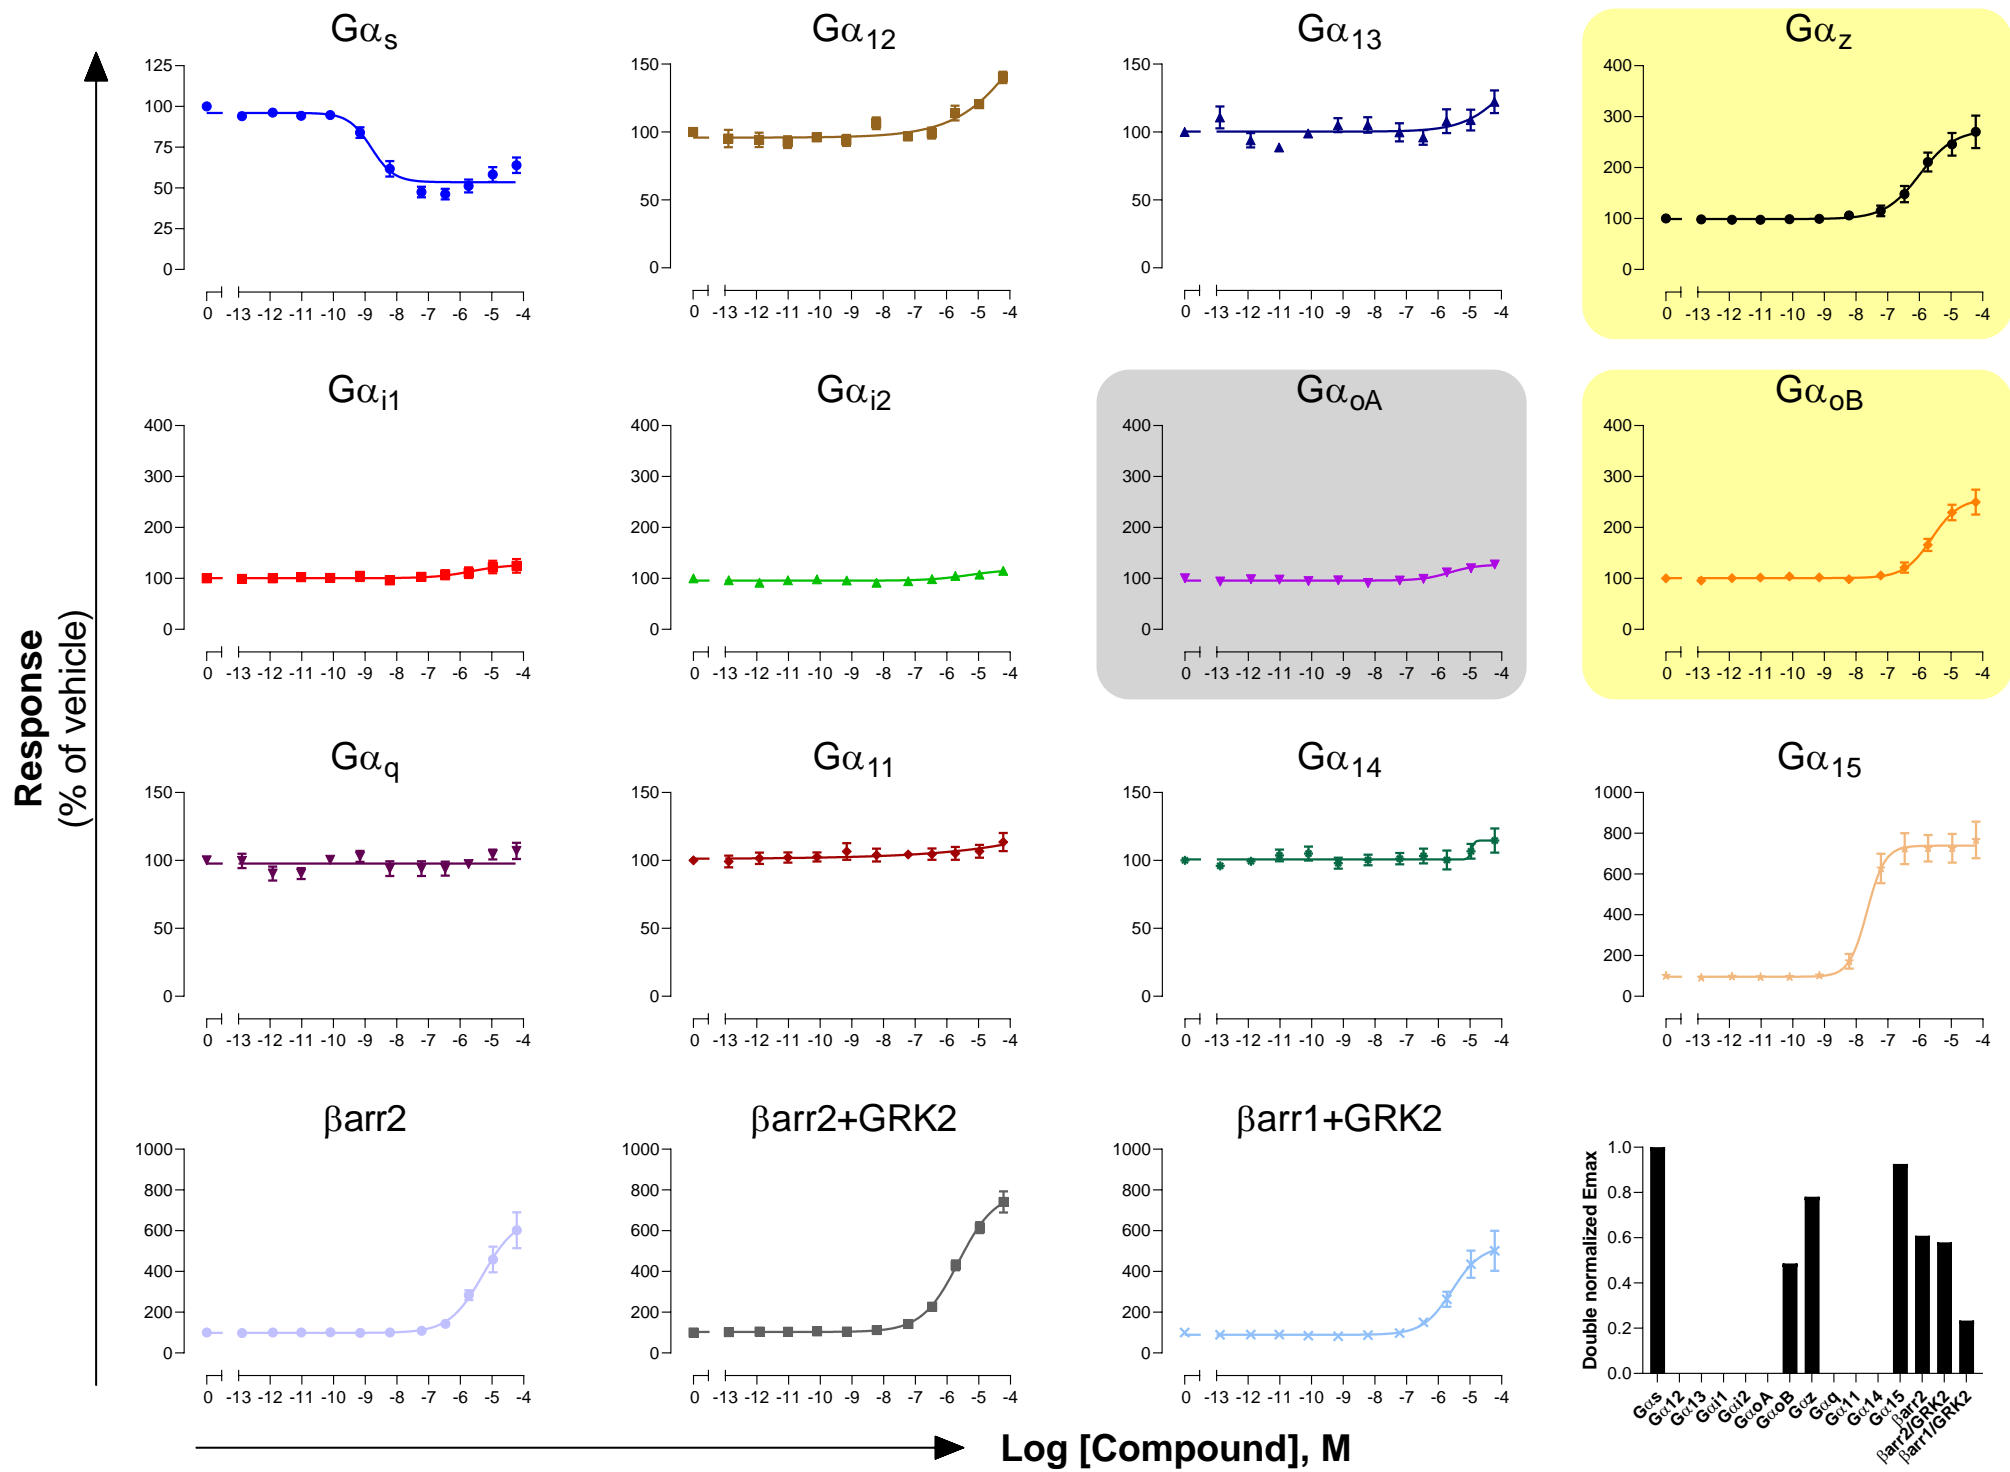

# GPCR: D<sub>2</sub>

Ligand: Dopamine

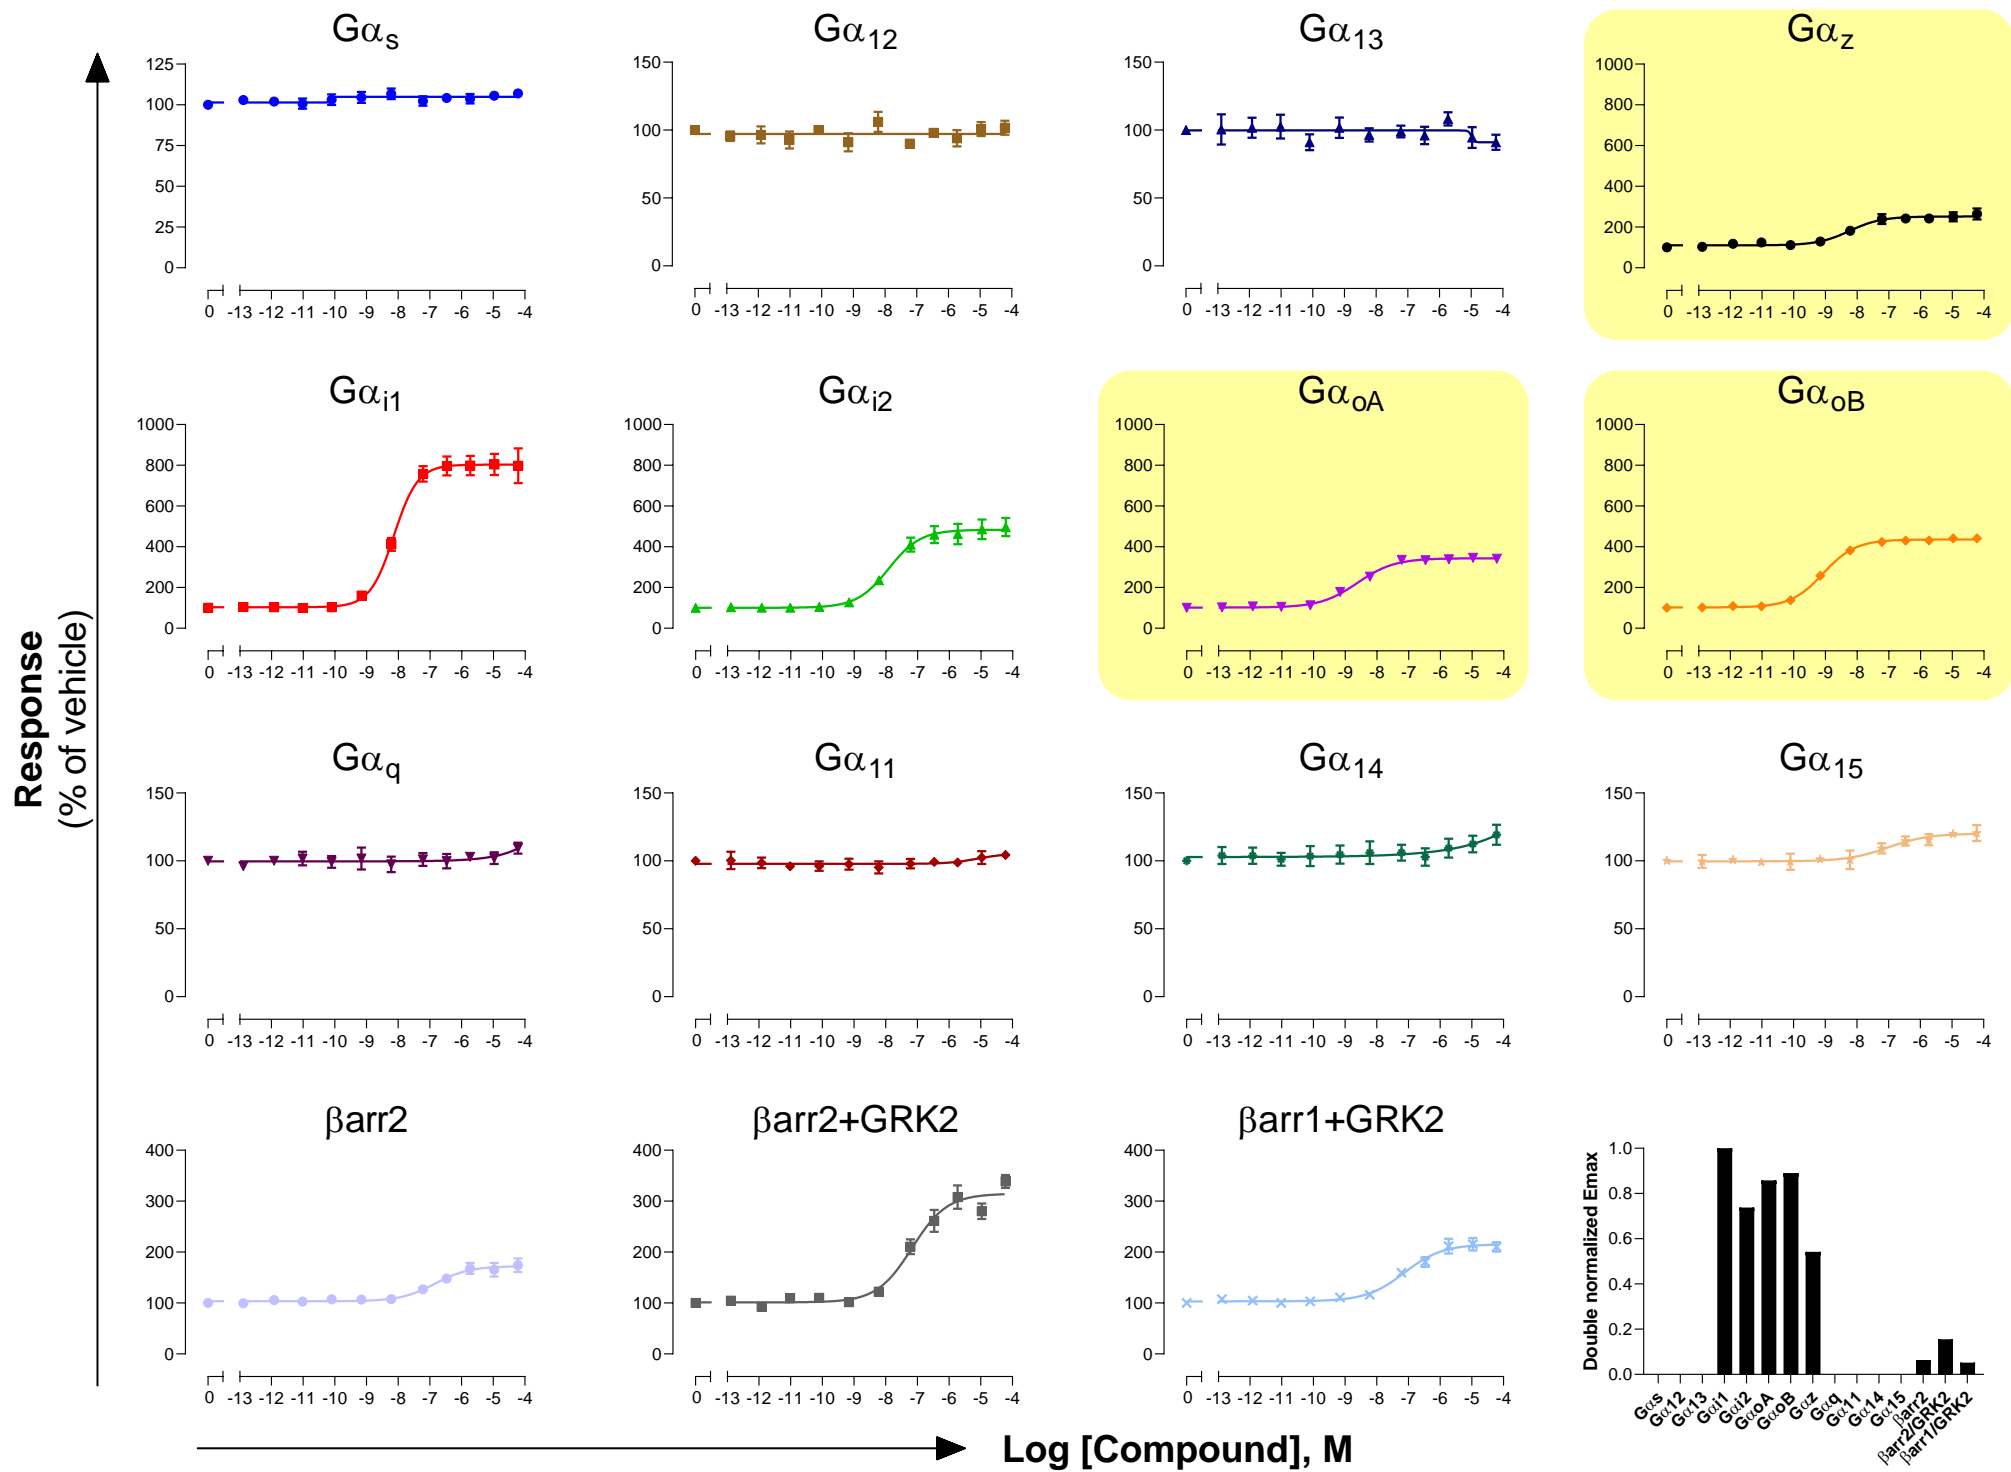

# GPCR: D<sub>5</sub>

Ligand: Dopamine

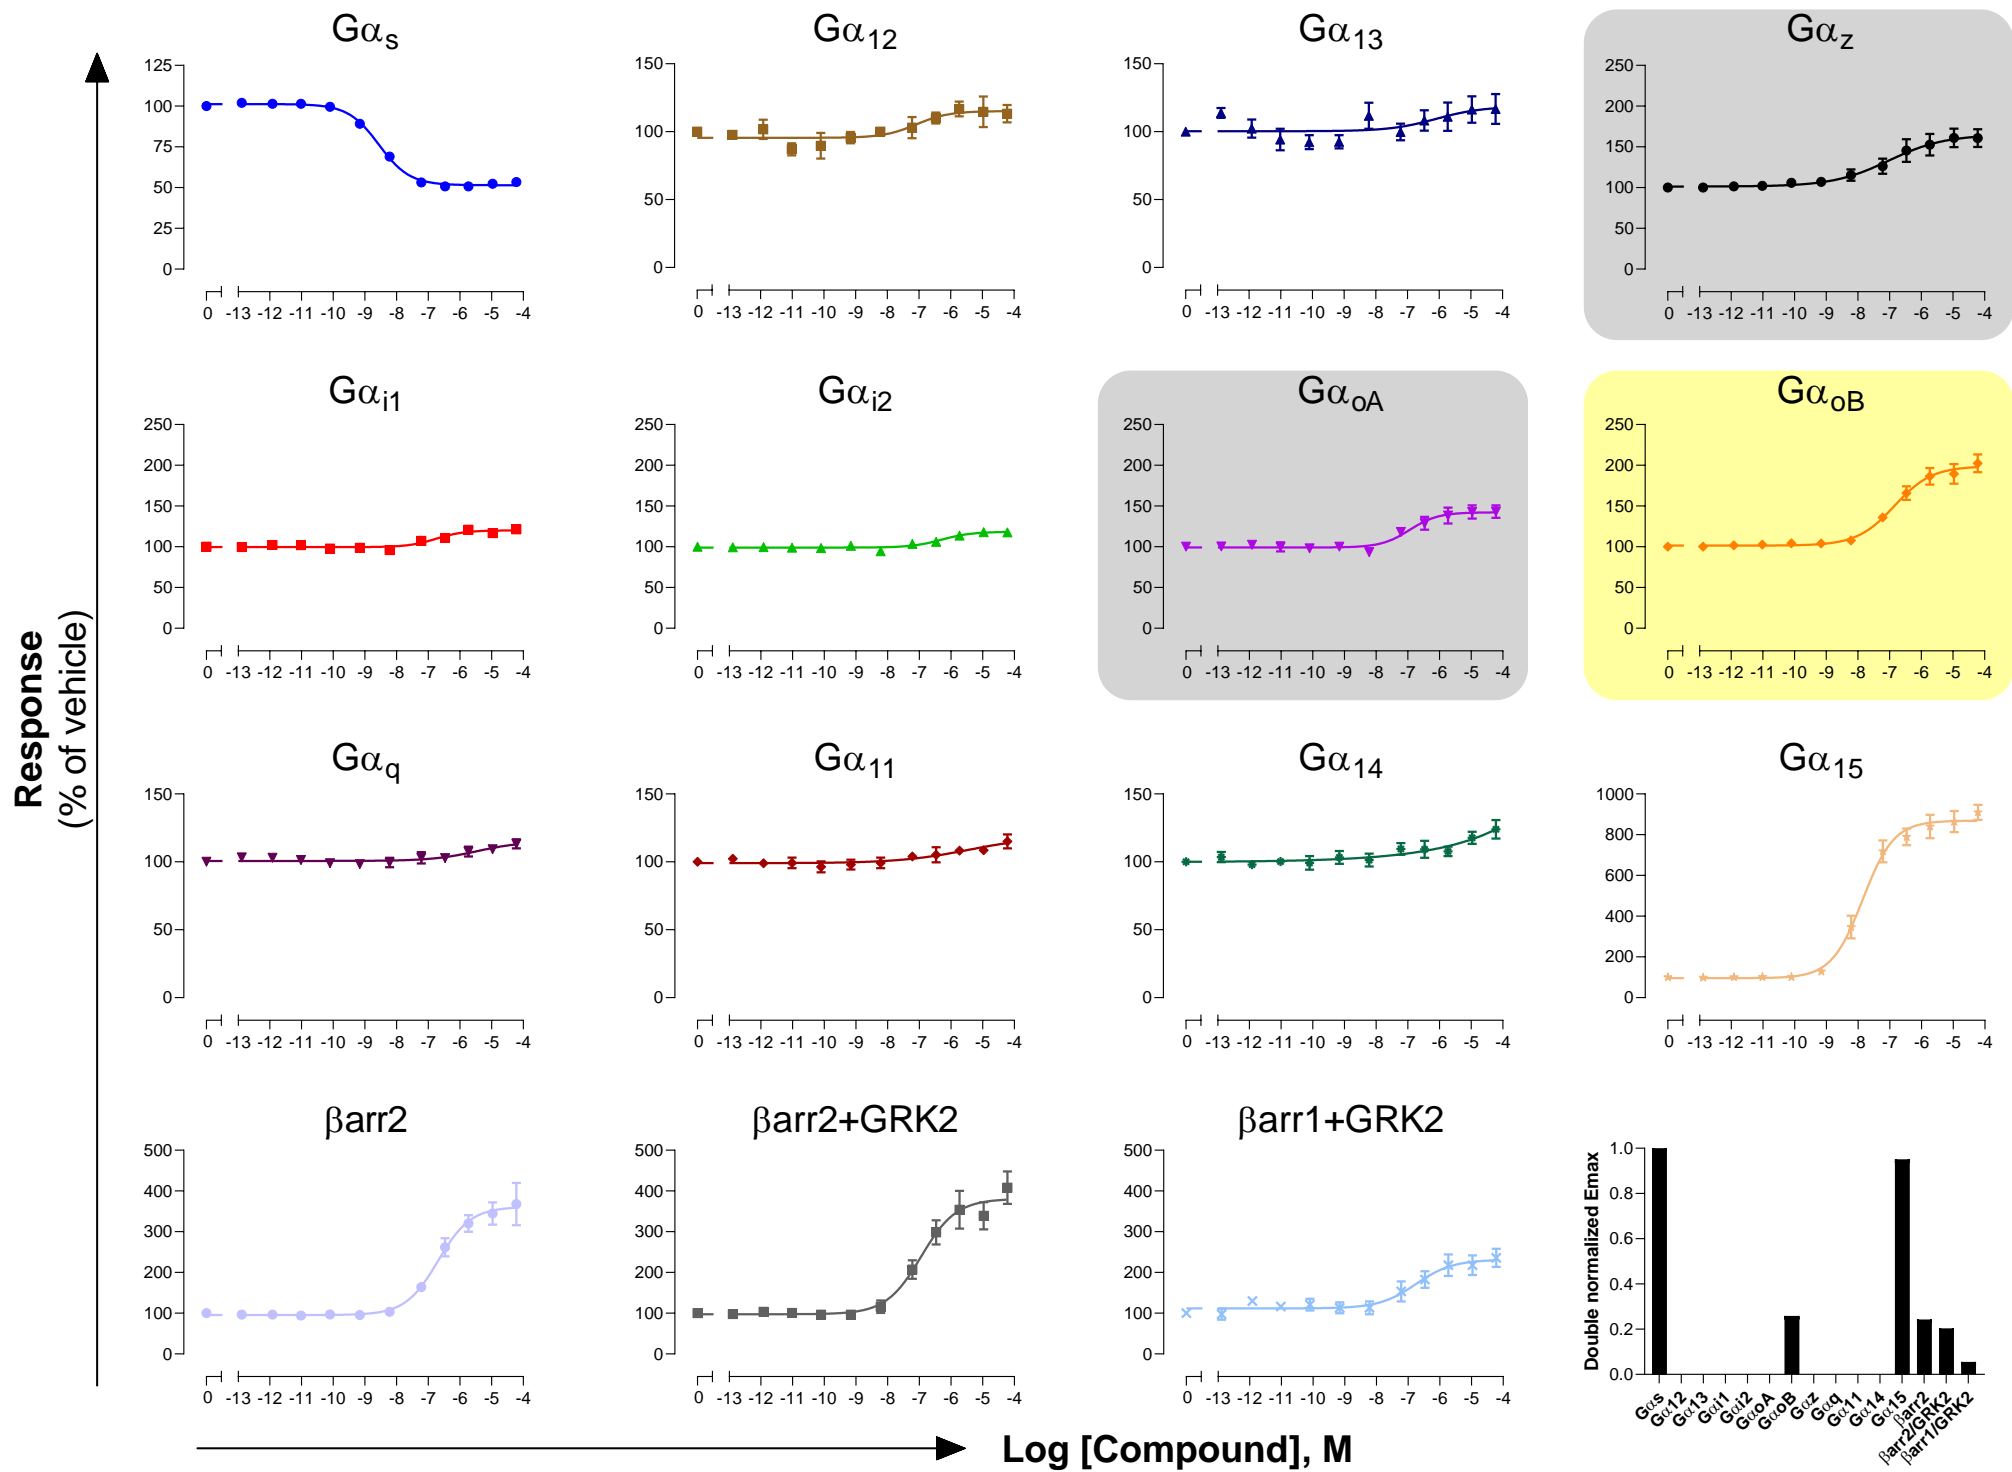



**GPCR:  $\delta$ OR**  
**Ligand: SNC-80**

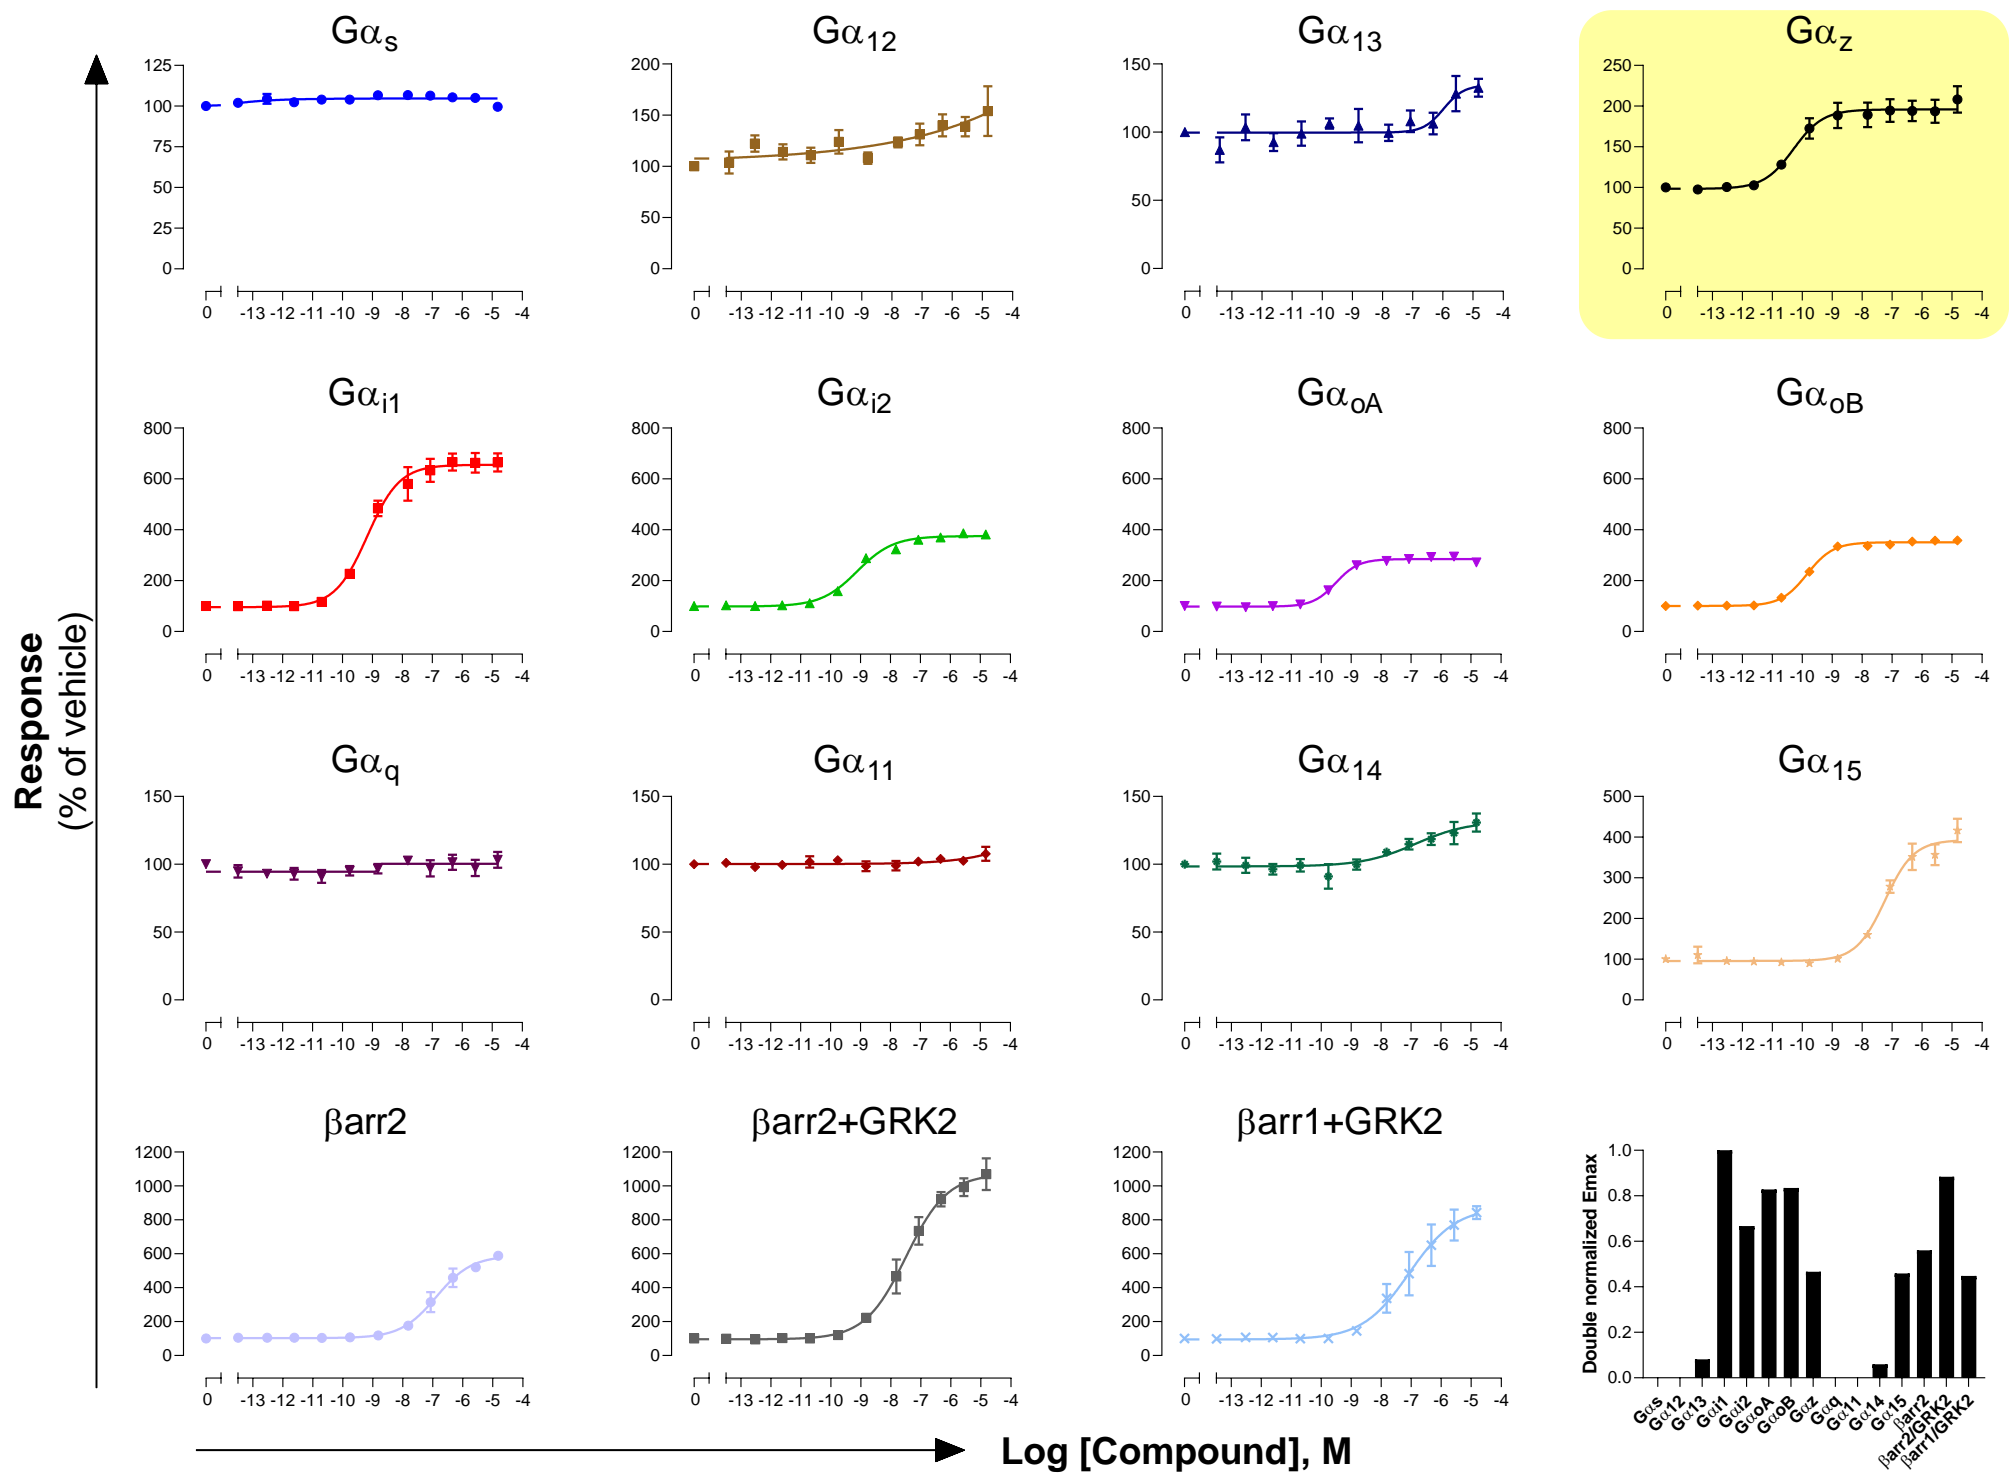

**GPCR: EP<sub>1</sub>**  
**Ligand: PGE<sub>2</sub>**

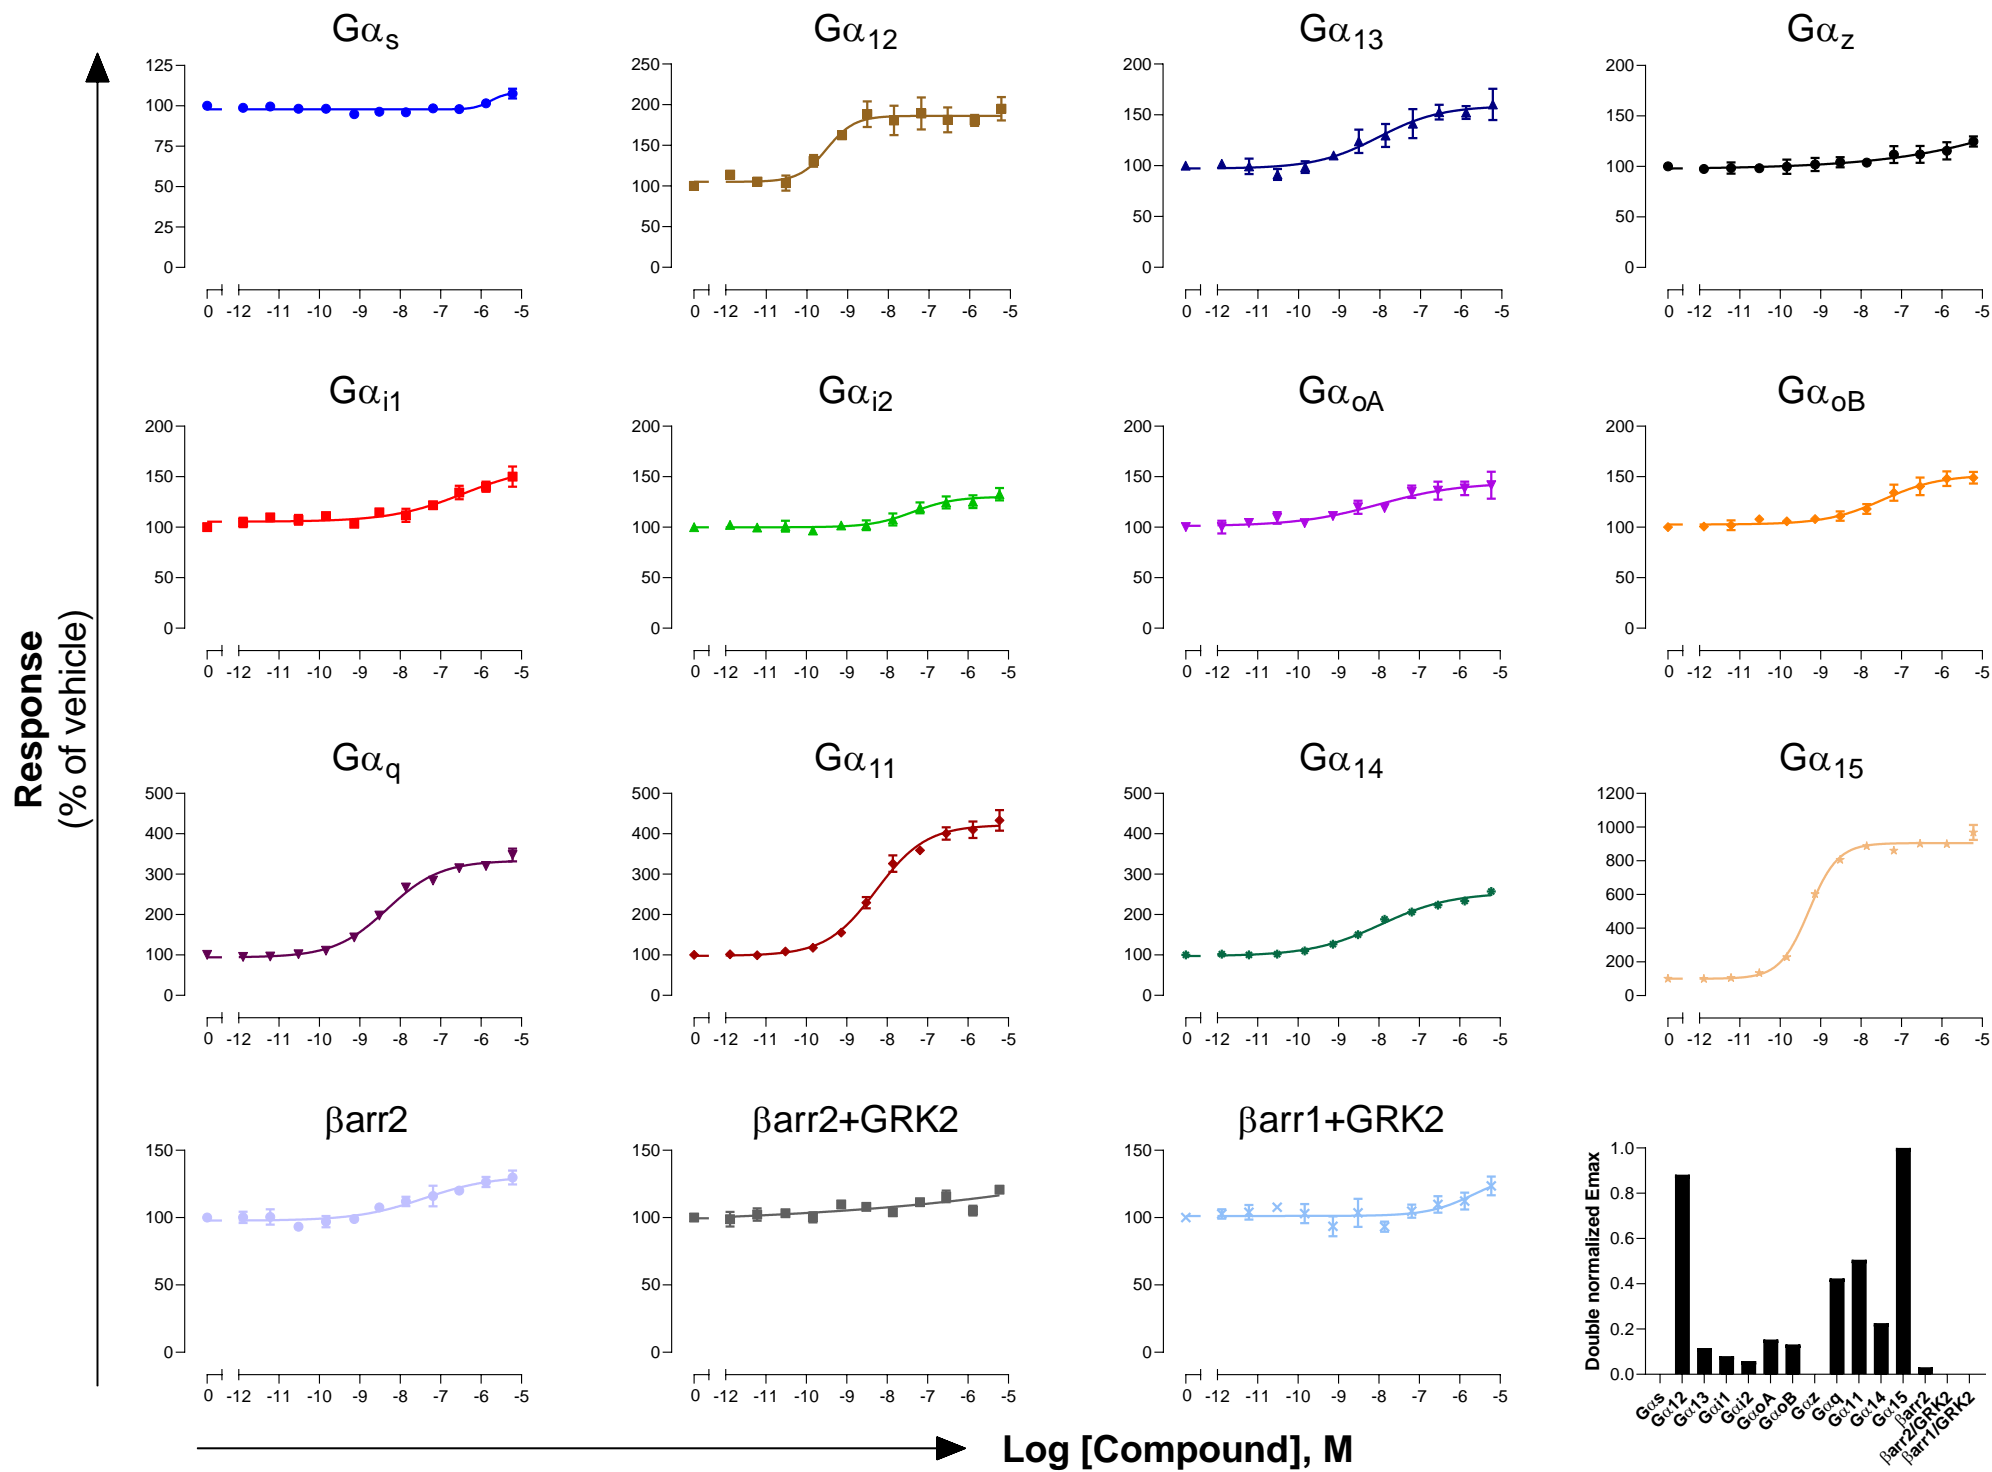

**GPCR: EP<sub>2</sub>**  
**Ligand: PGE<sub>2</sub>**

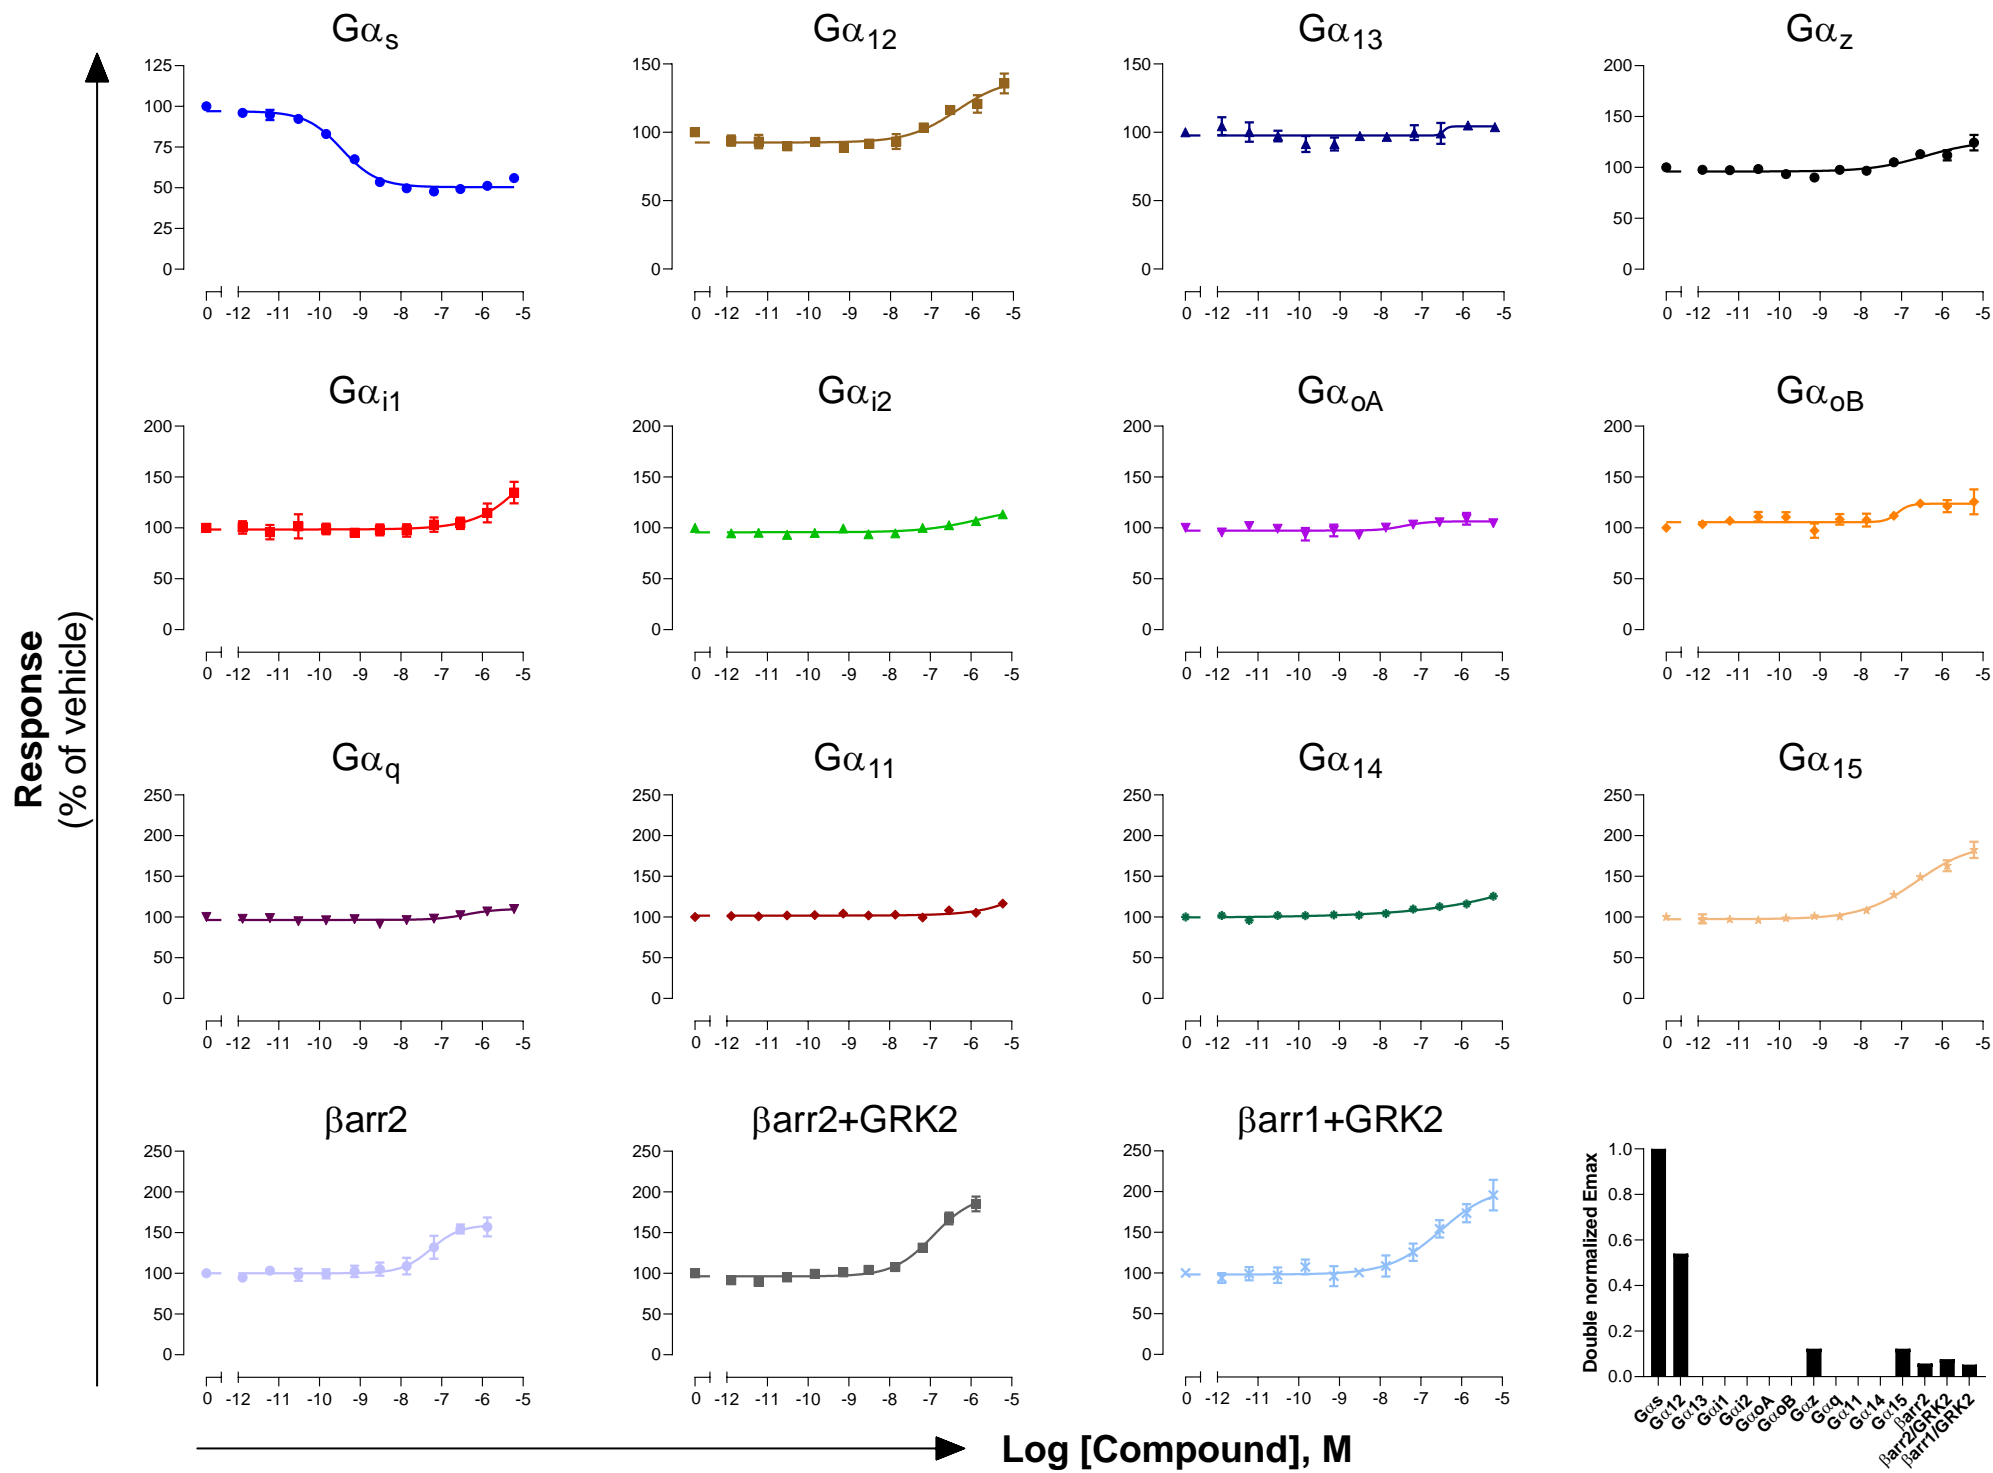

**GPCR: EP<sub>3</sub>**  
**Ligand: PGE<sub>2</sub>**

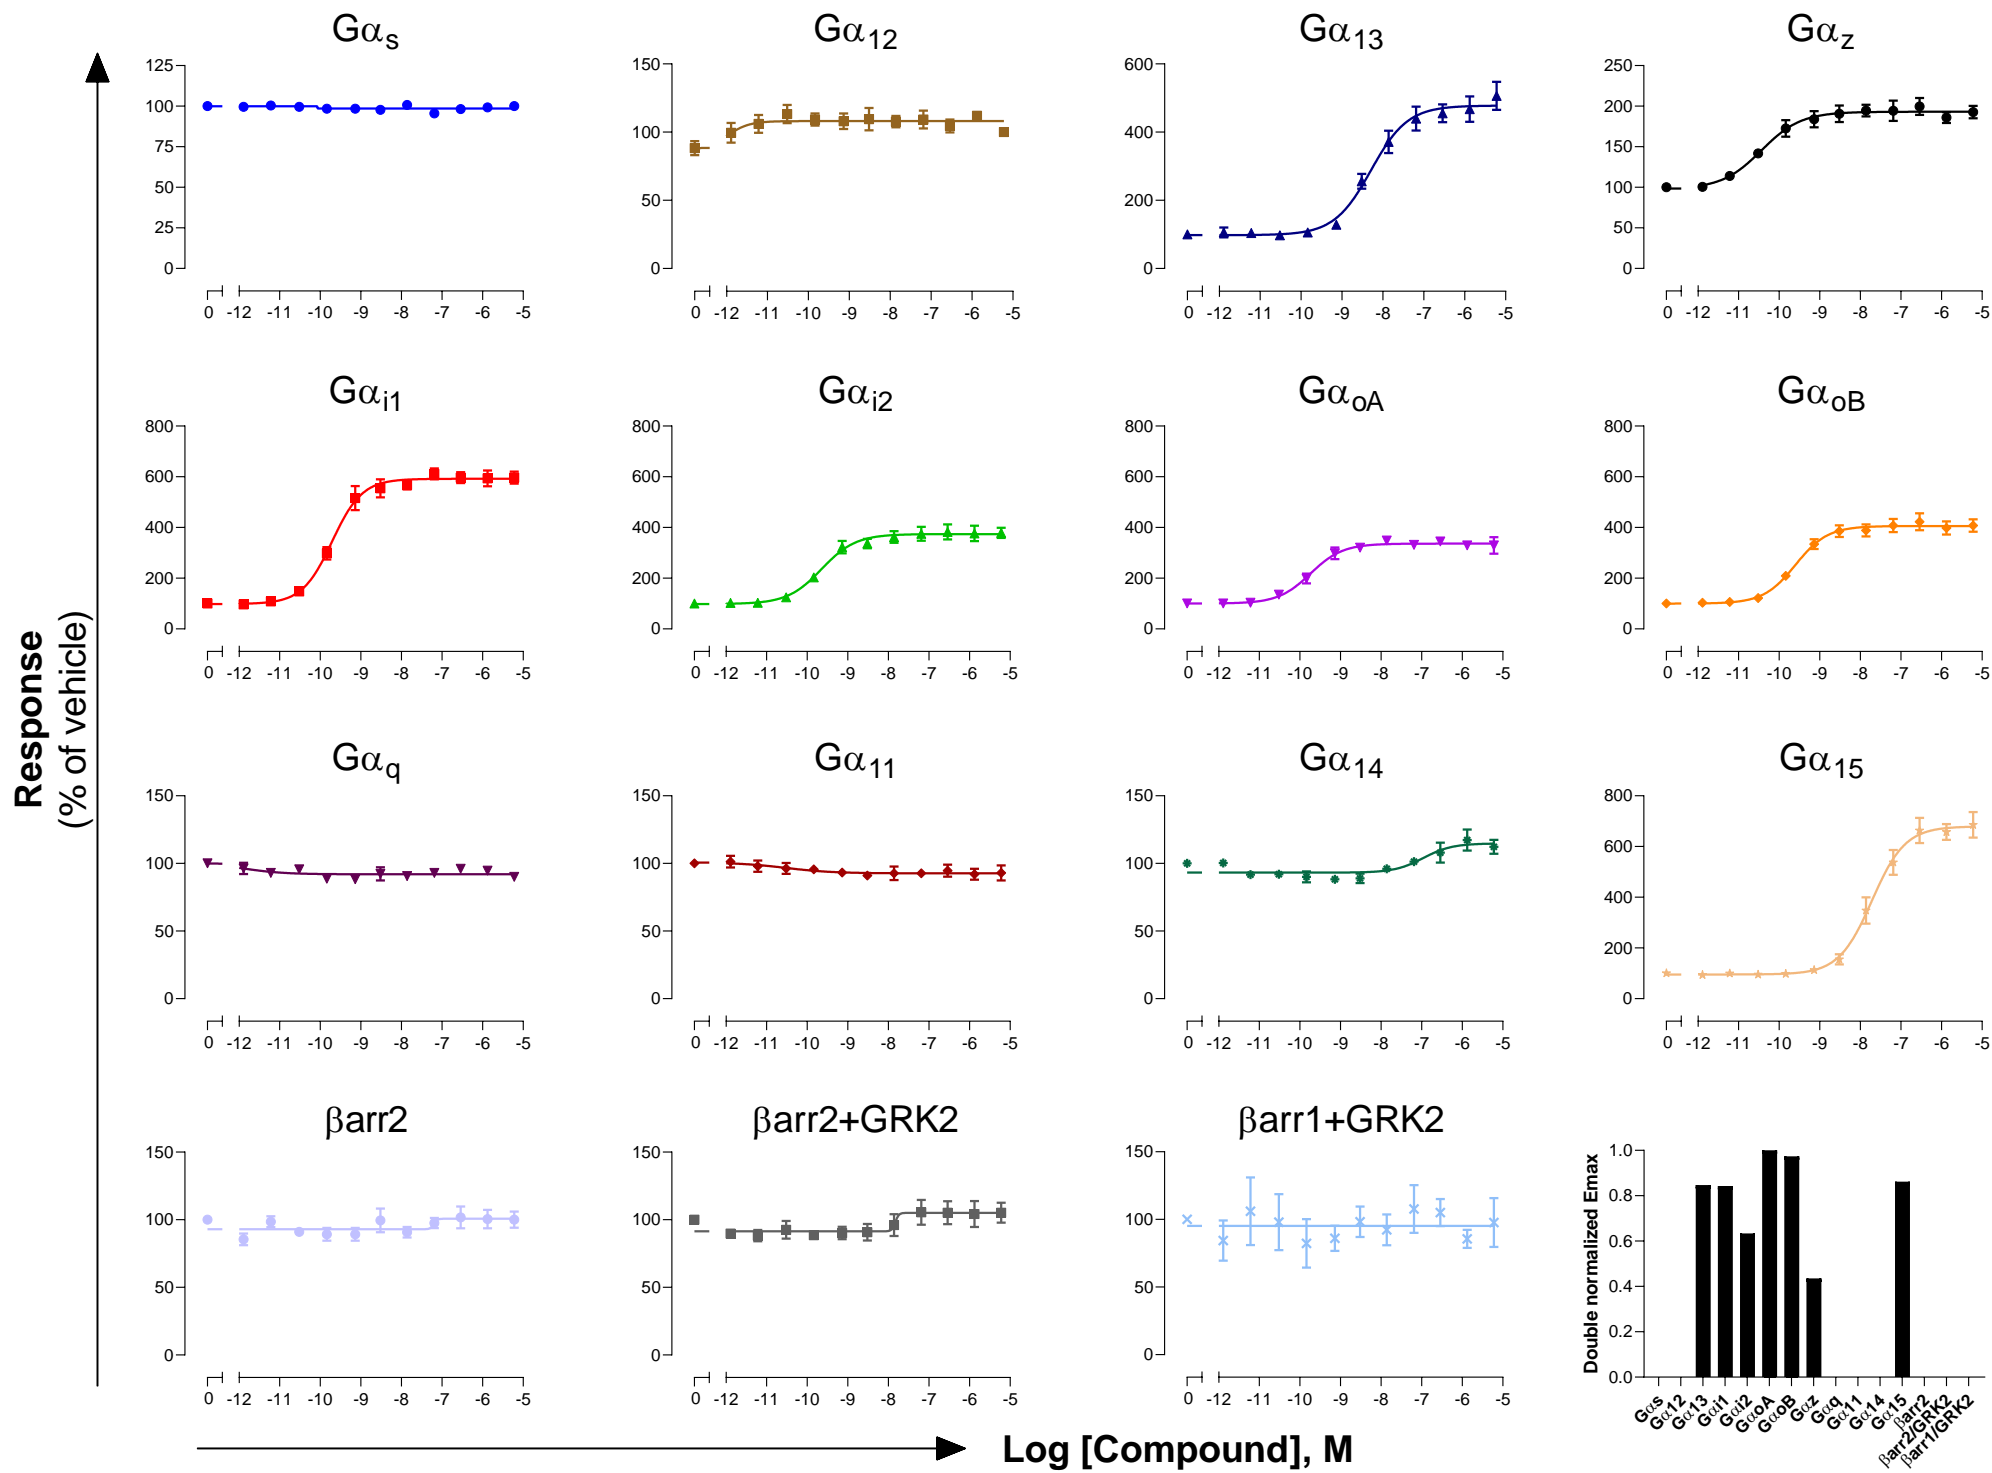

**GPCR: EP<sub>4</sub>**  
**Ligand: PGE<sub>2</sub>**

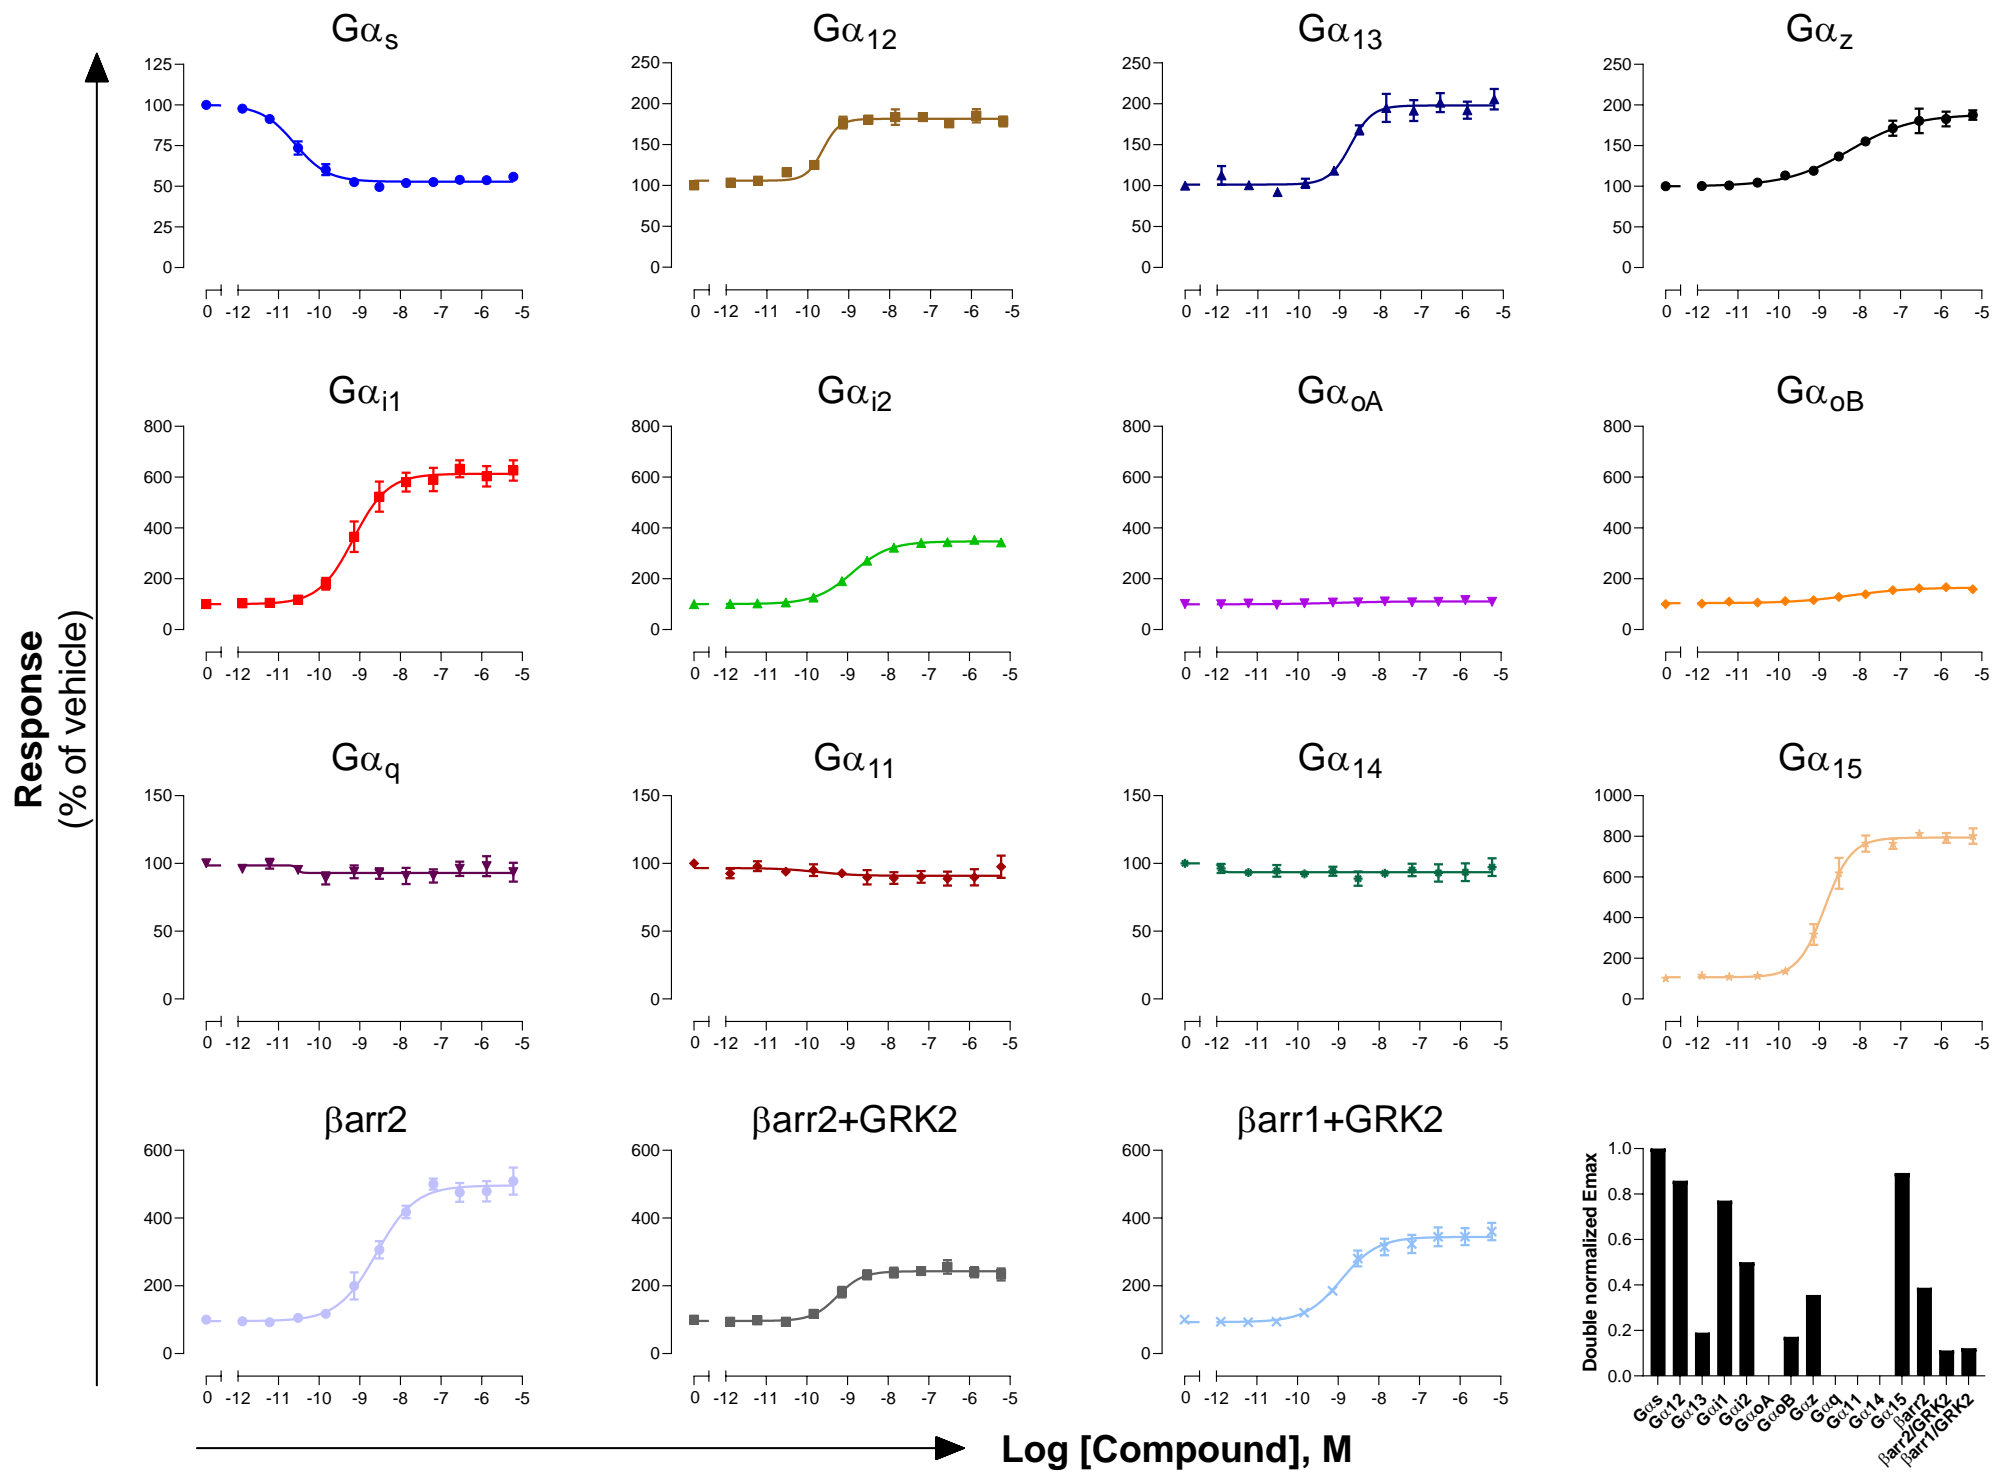

# GPCR: ET<sub>A</sub>

## Ligand: Endothelin-1

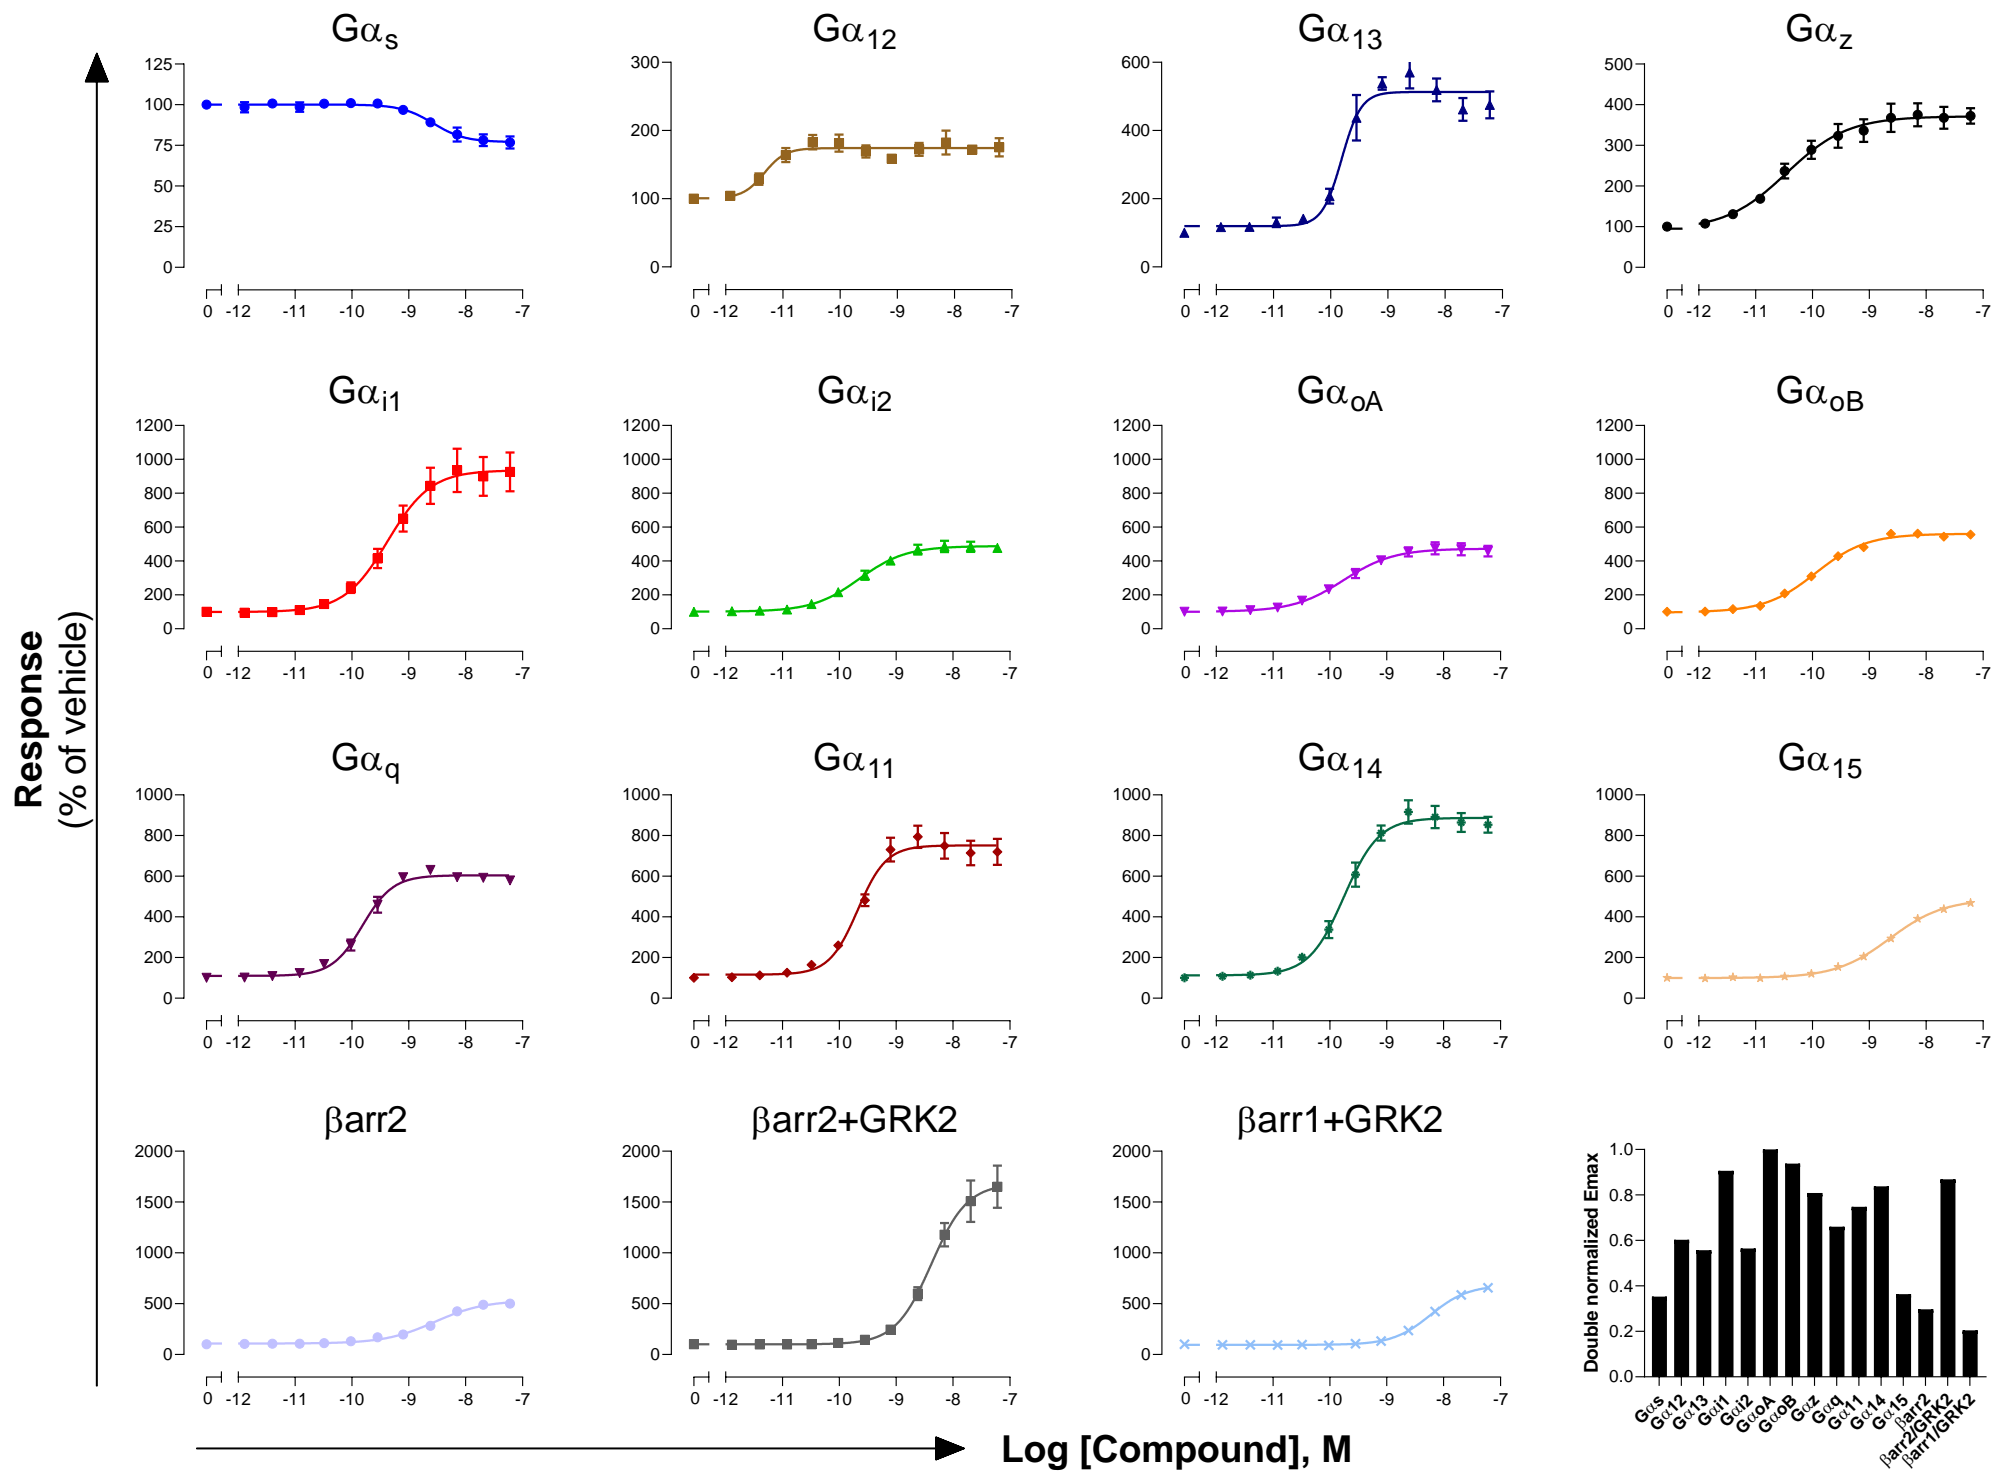

# GPCR: FFA2

## Ligand: Propionate

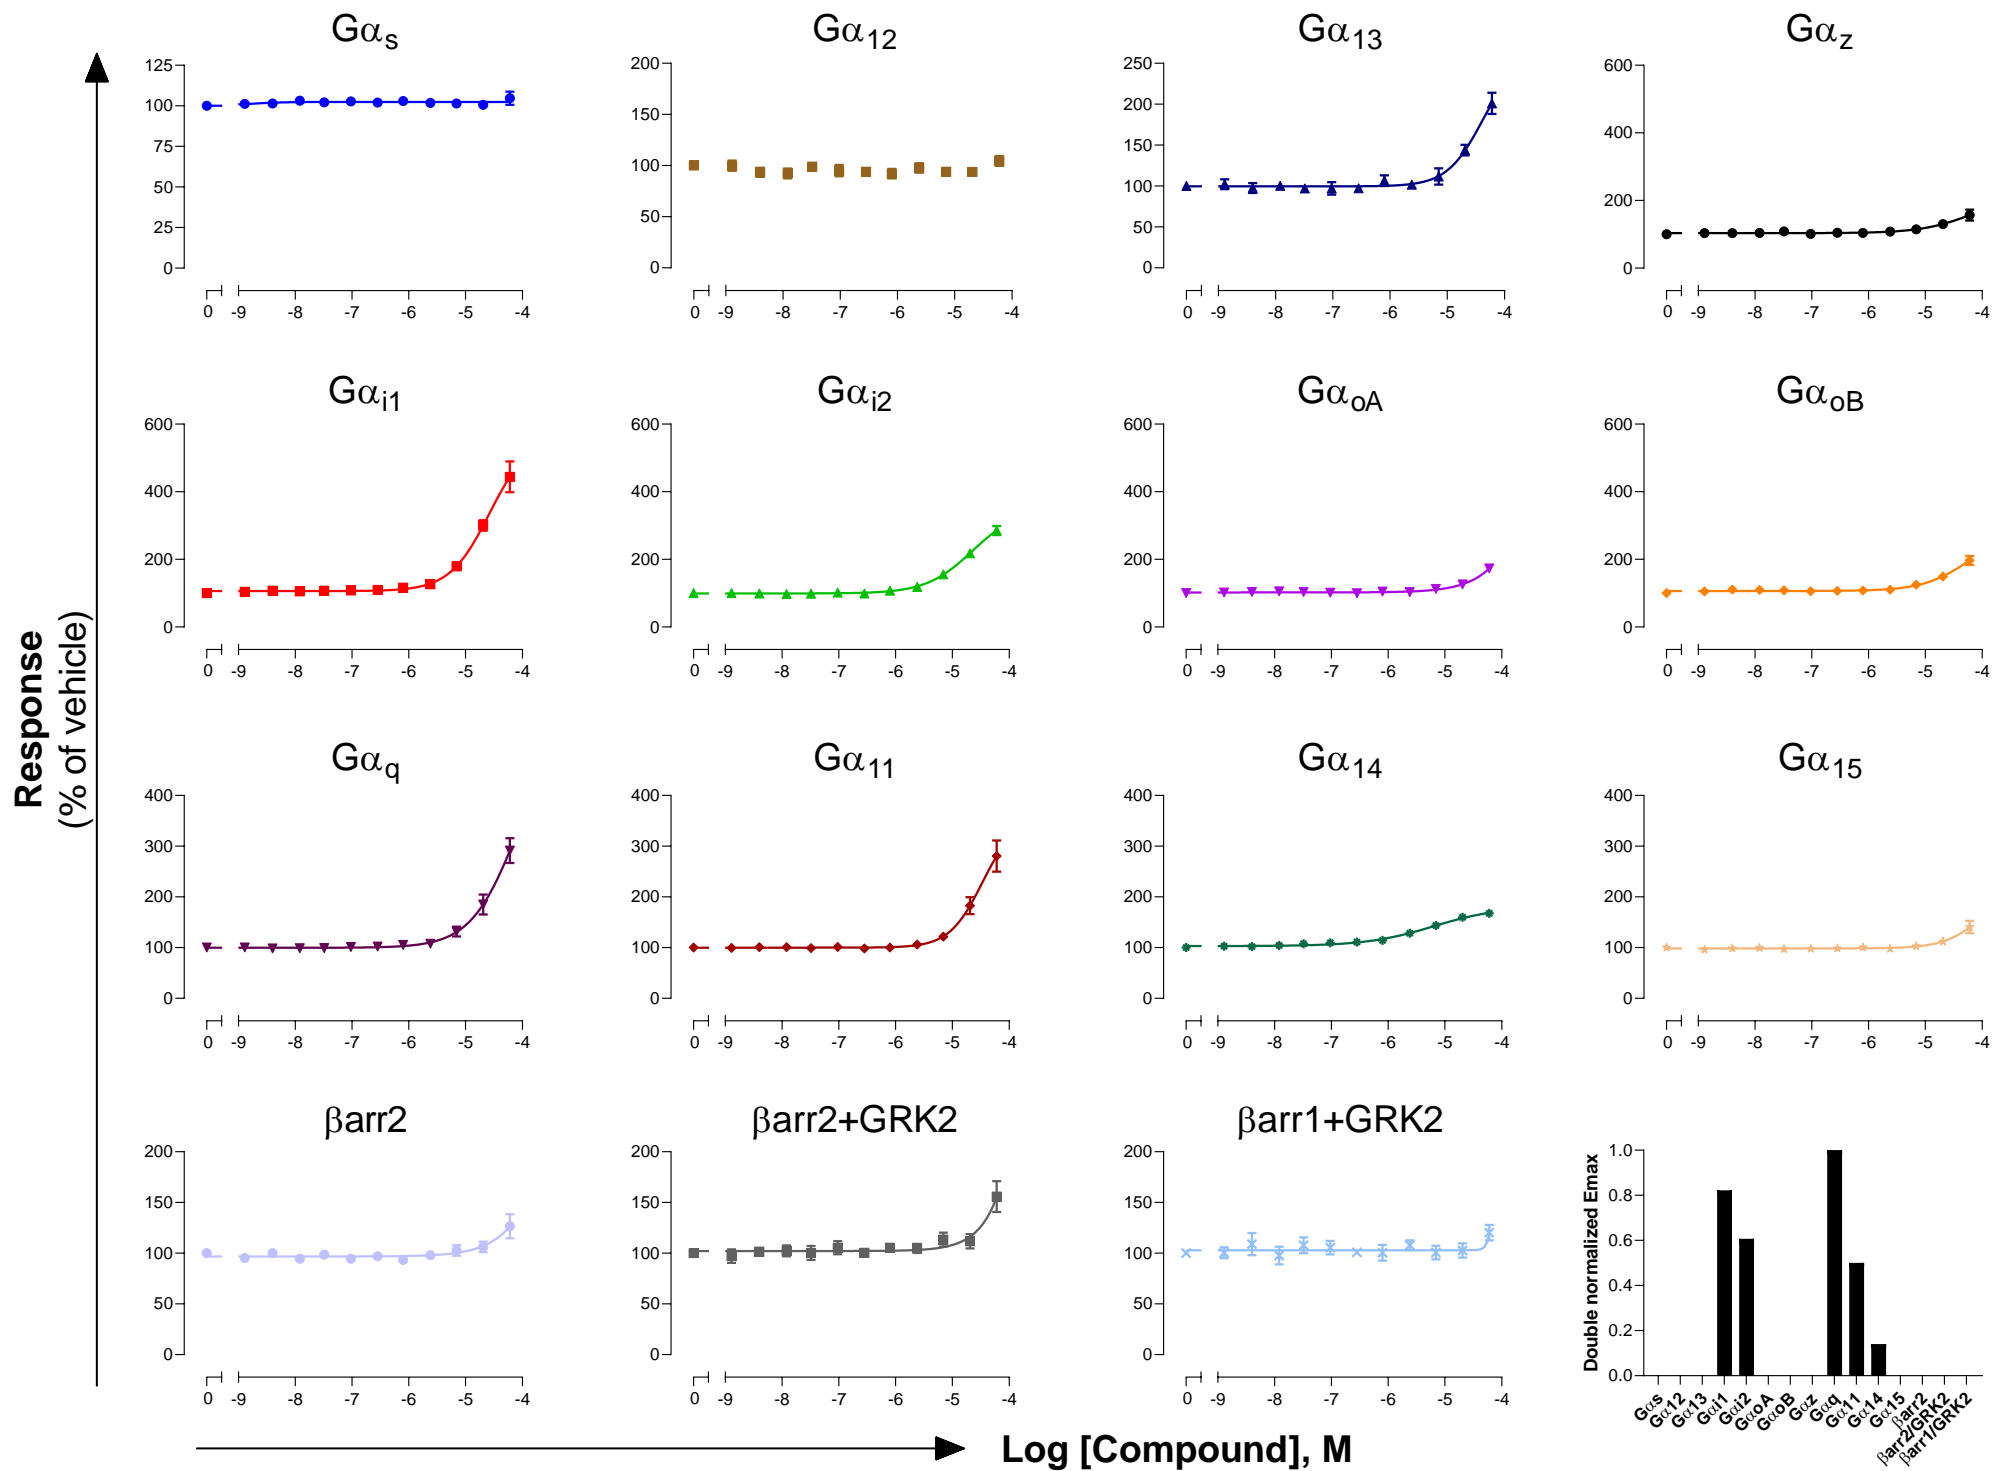

# GPCR: FFA3

## Ligand: Propionate

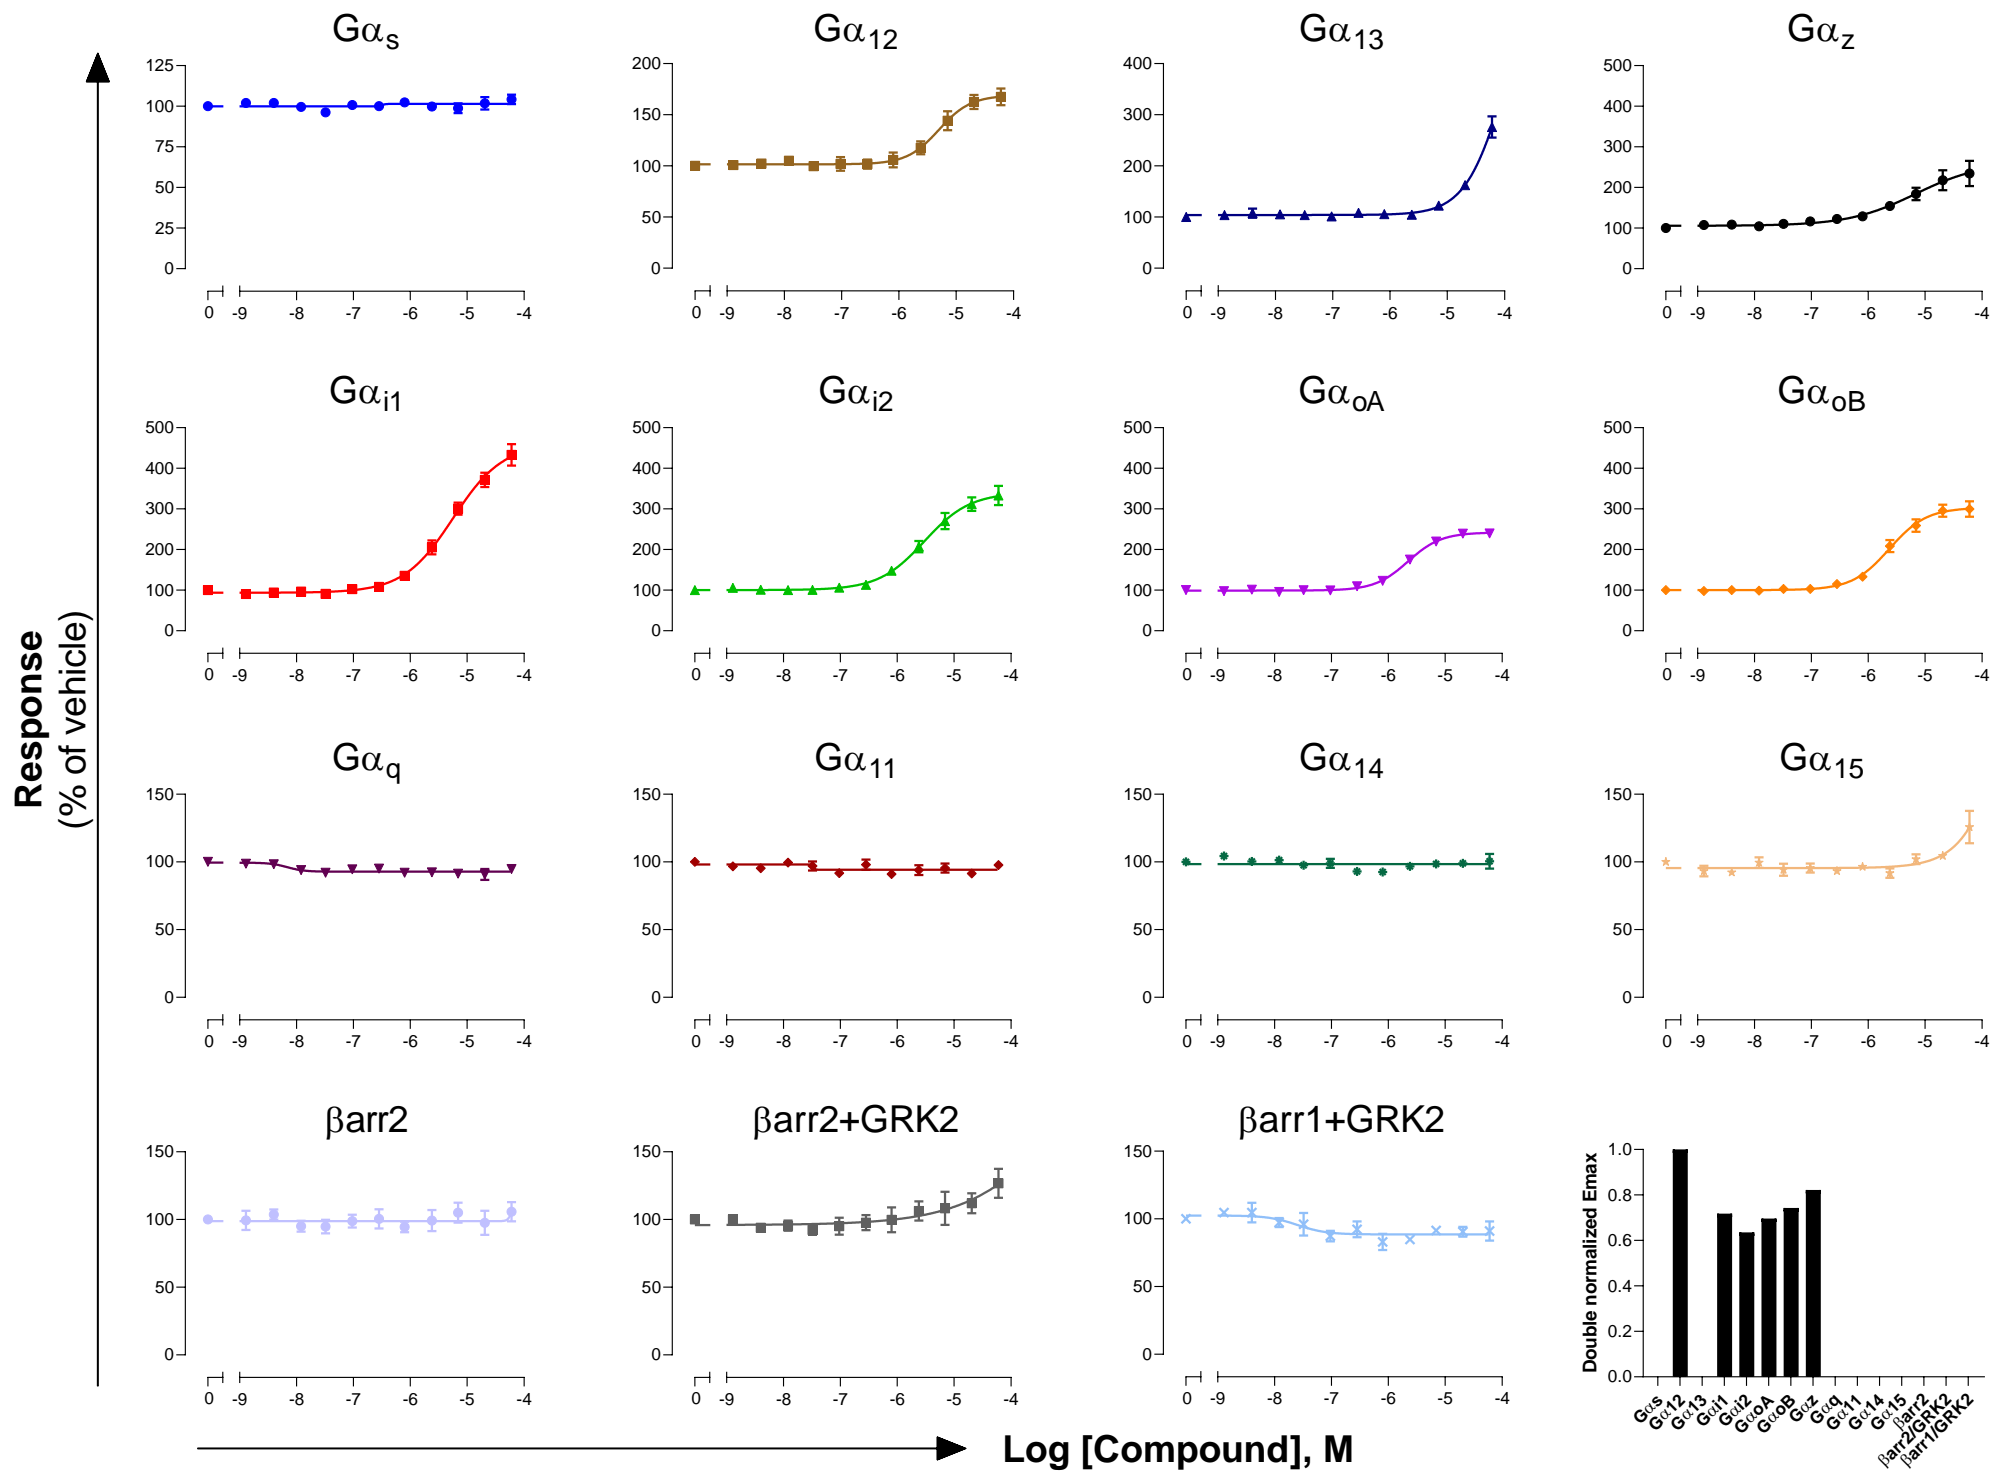



# GPCR: FFA4

Ligand:  $\alpha$ -linolenic acid

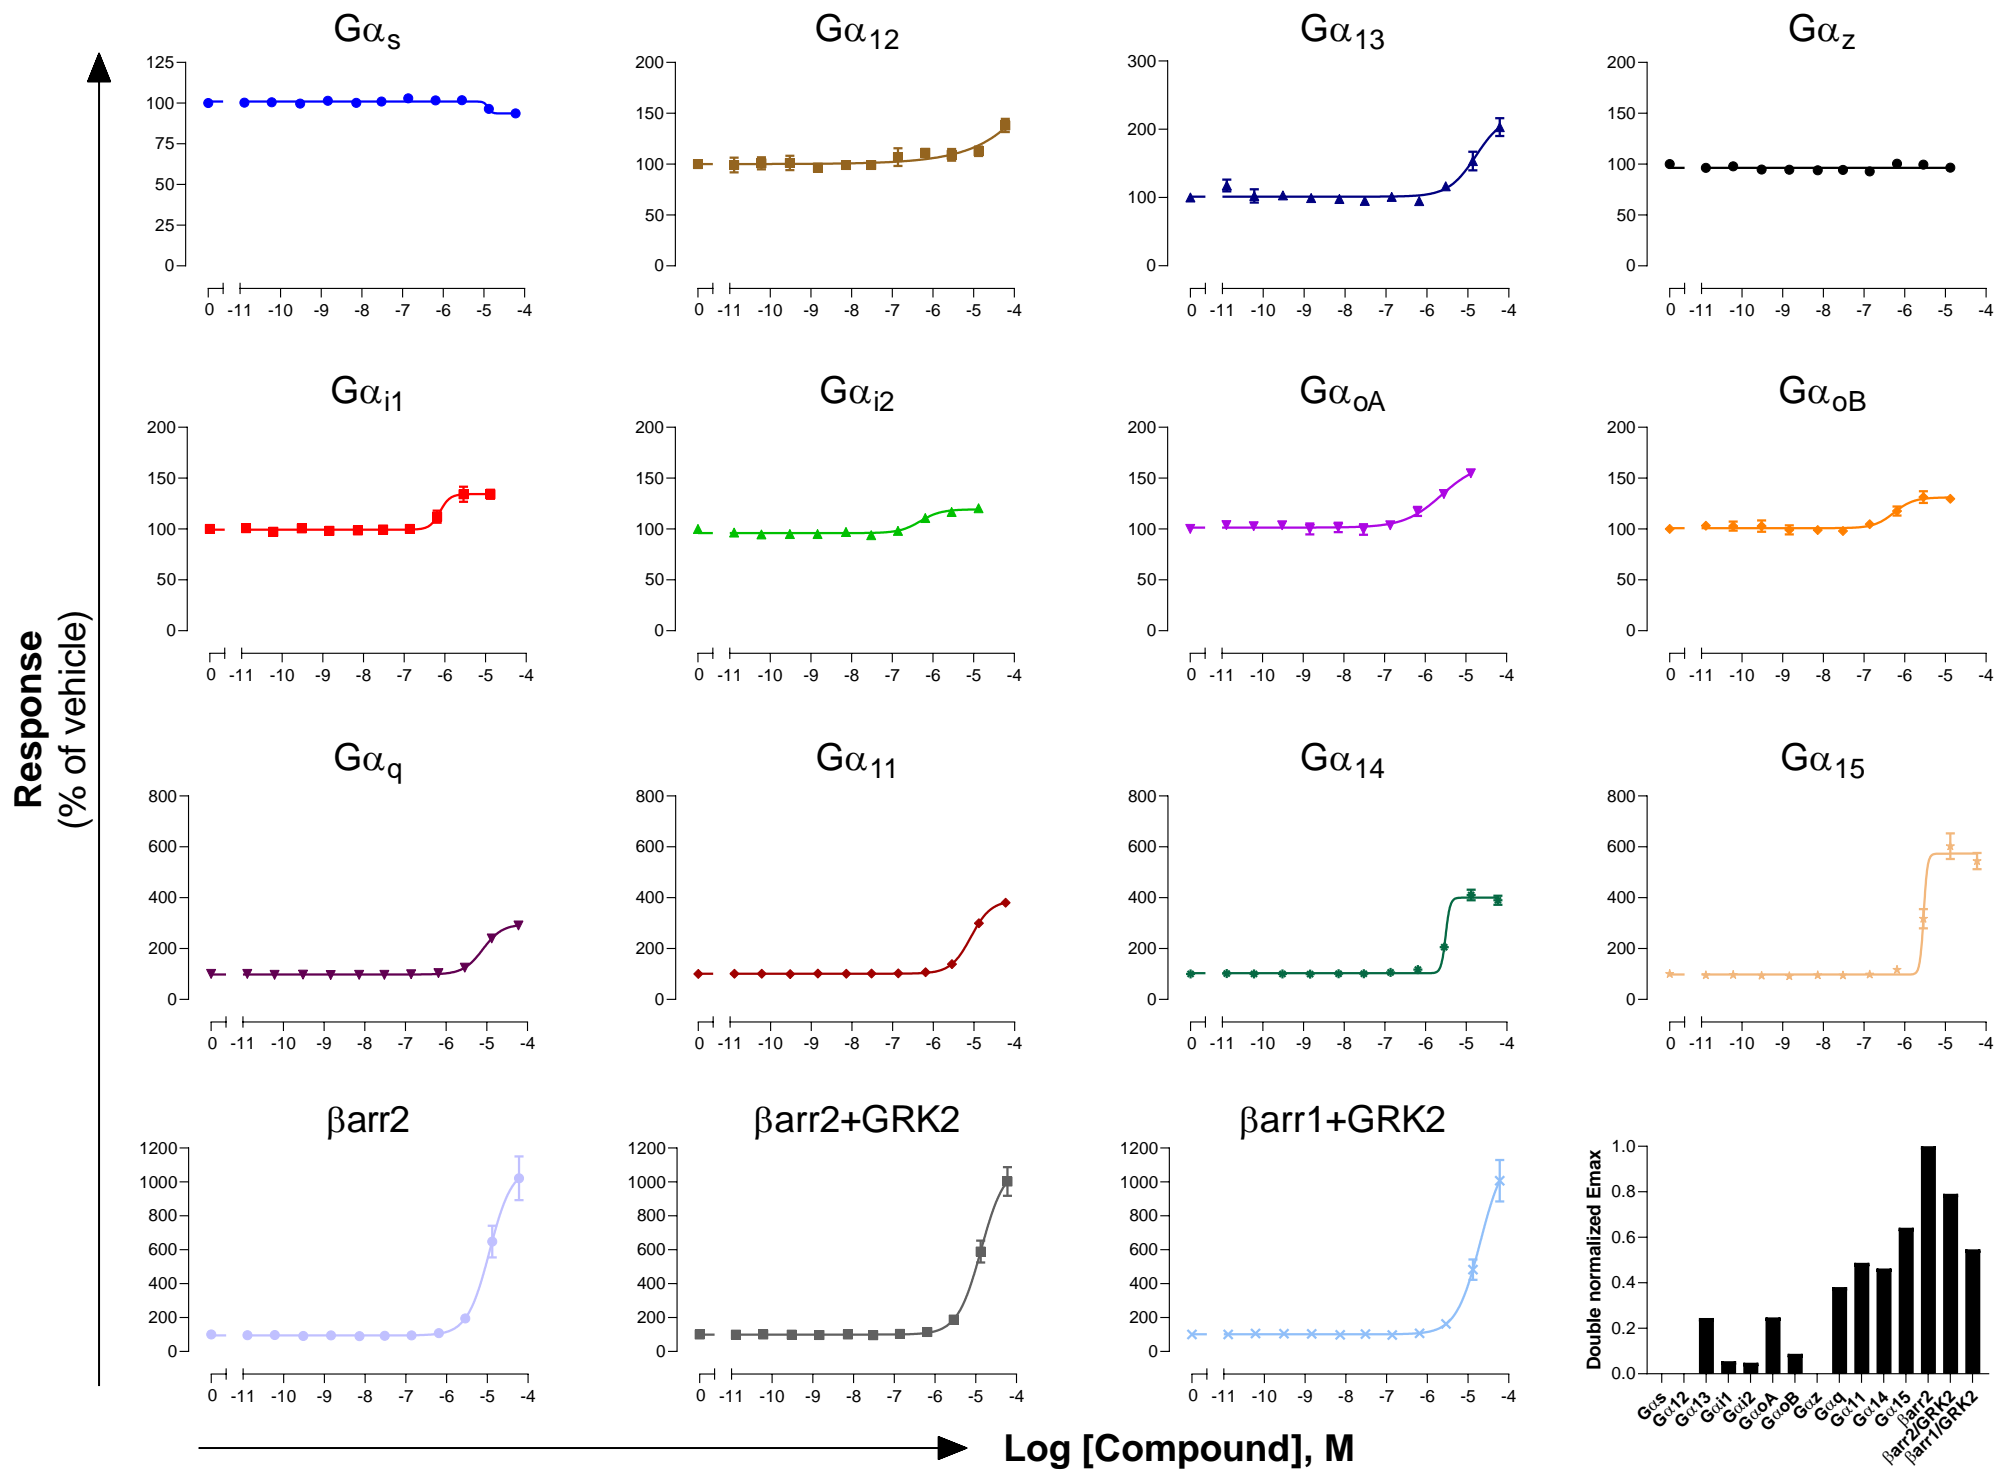

**GPCR: FP**  
**Ligand: PGD2**

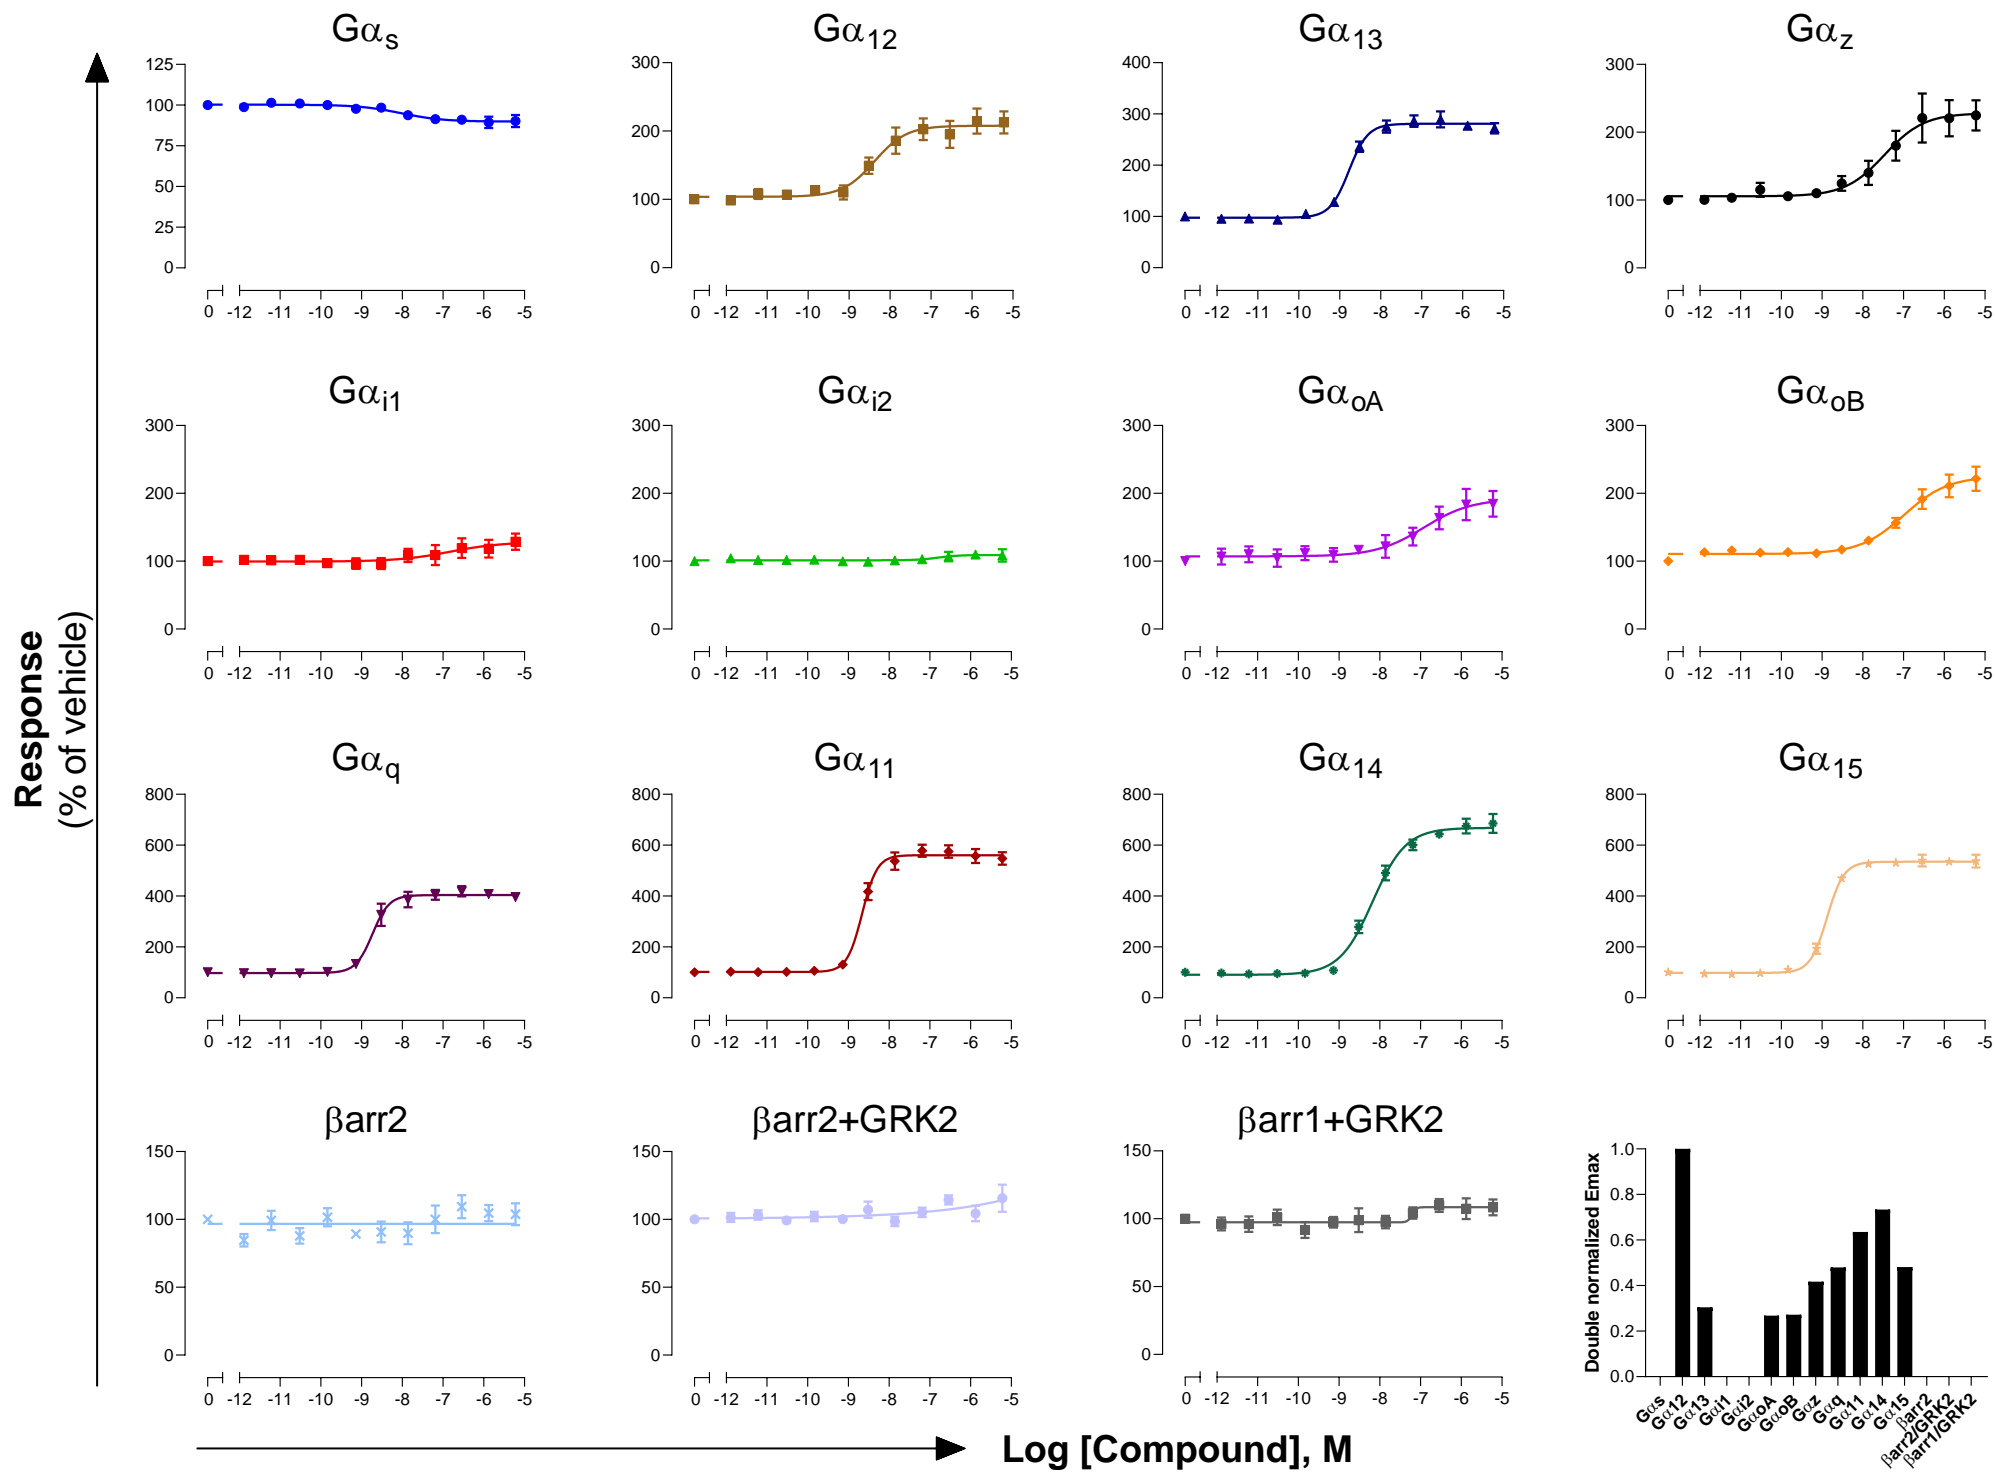

**GPCR: GCGR**  
**Ligand: Glucagon**

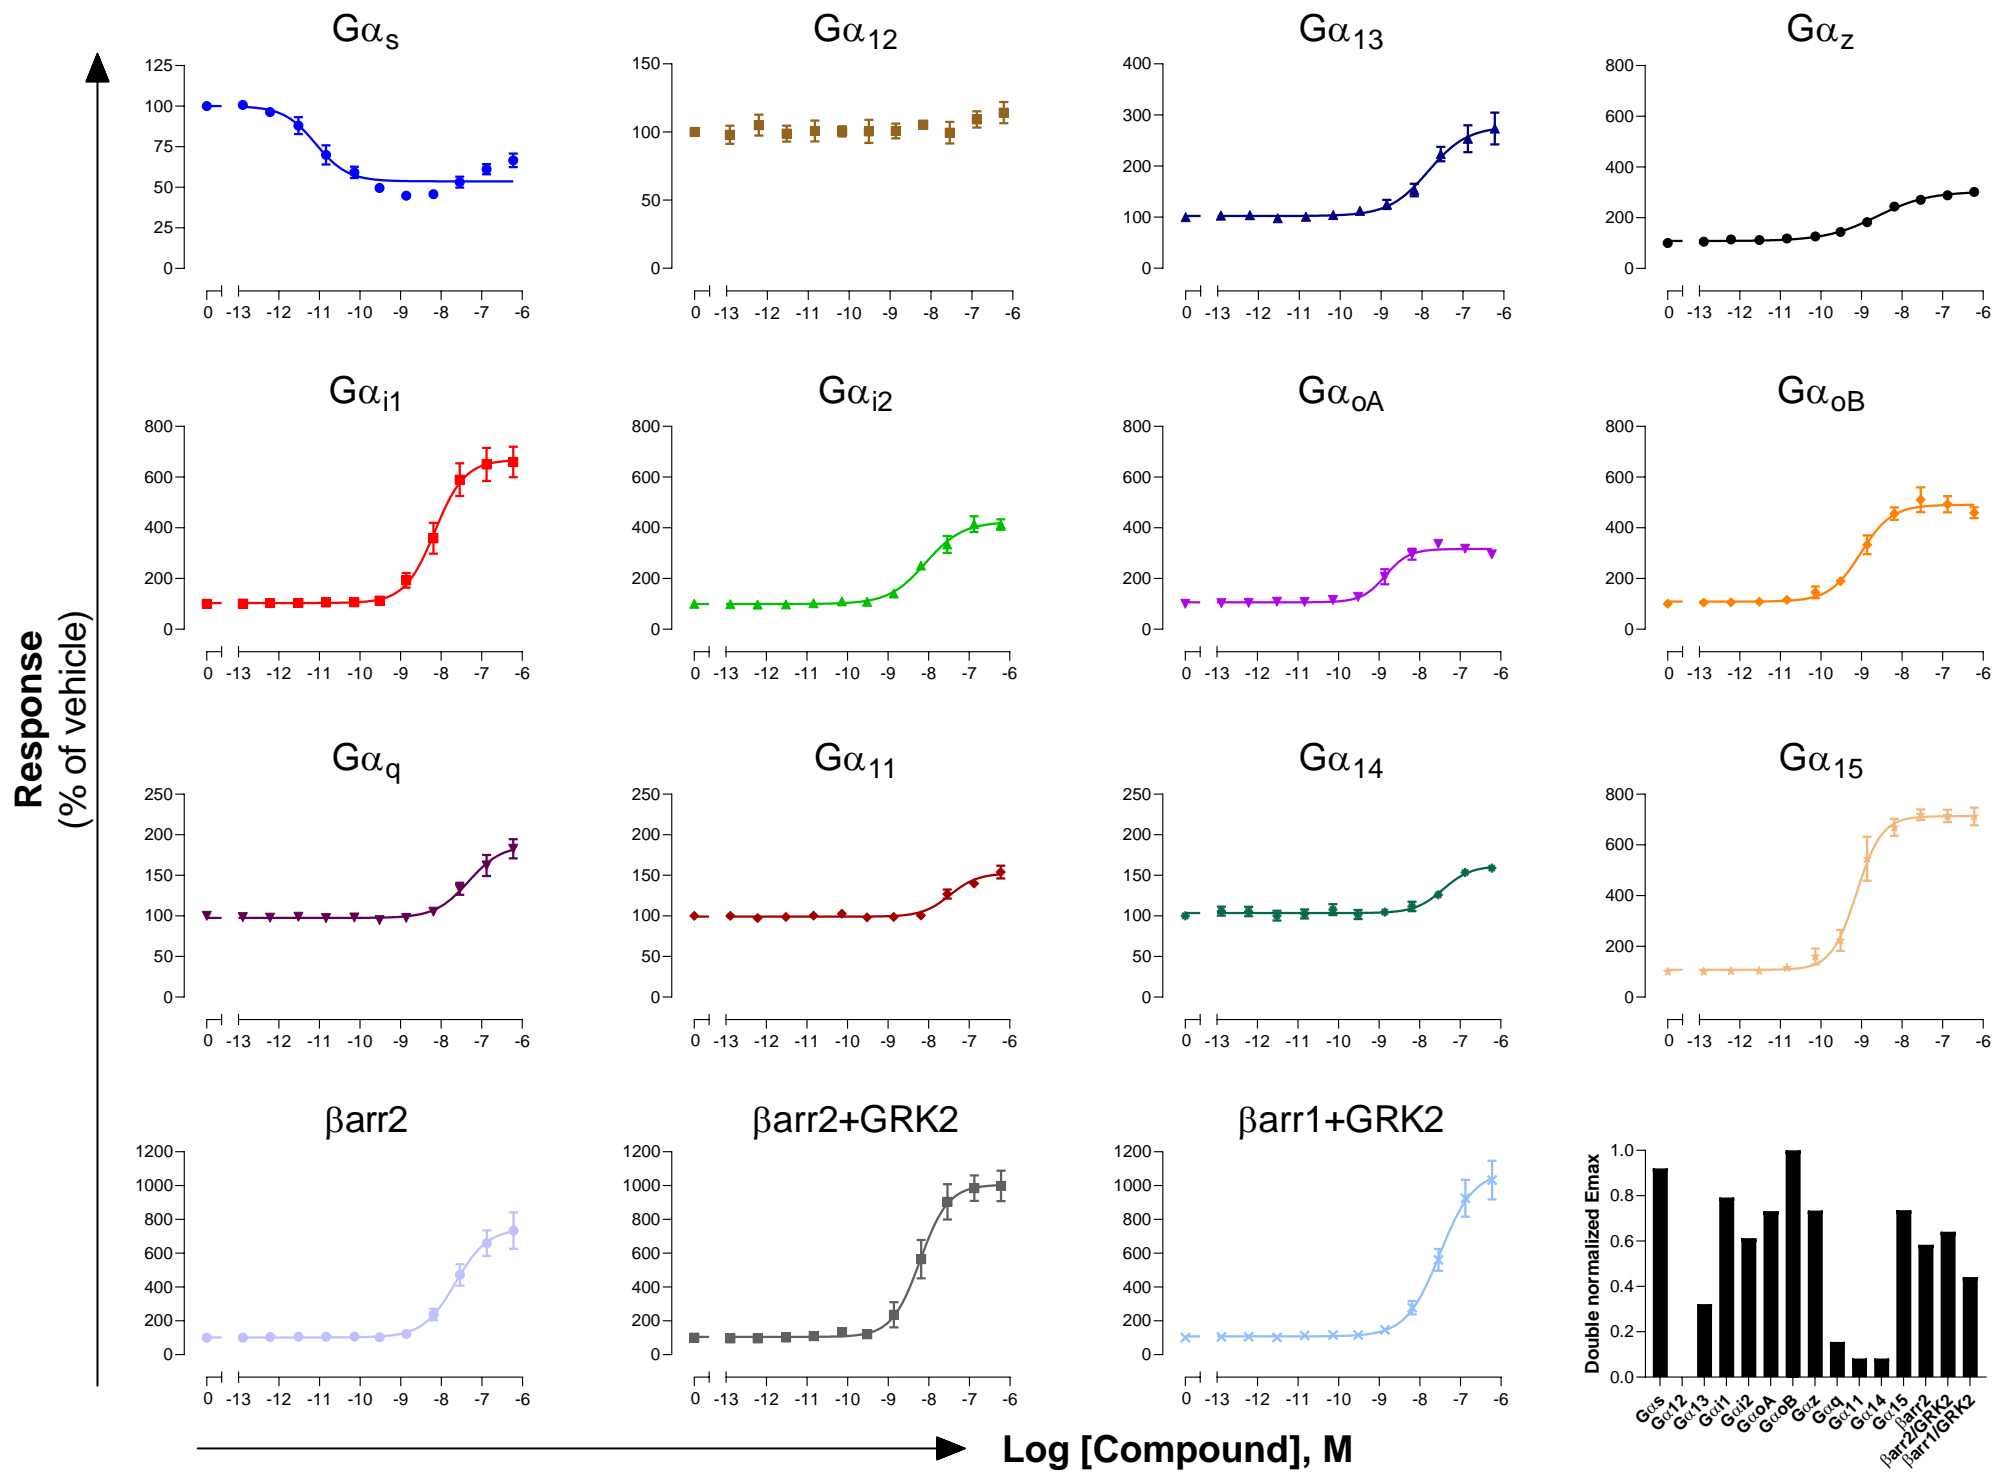

**GPCR: GHSR**  
**Ligand: Ghrelin**

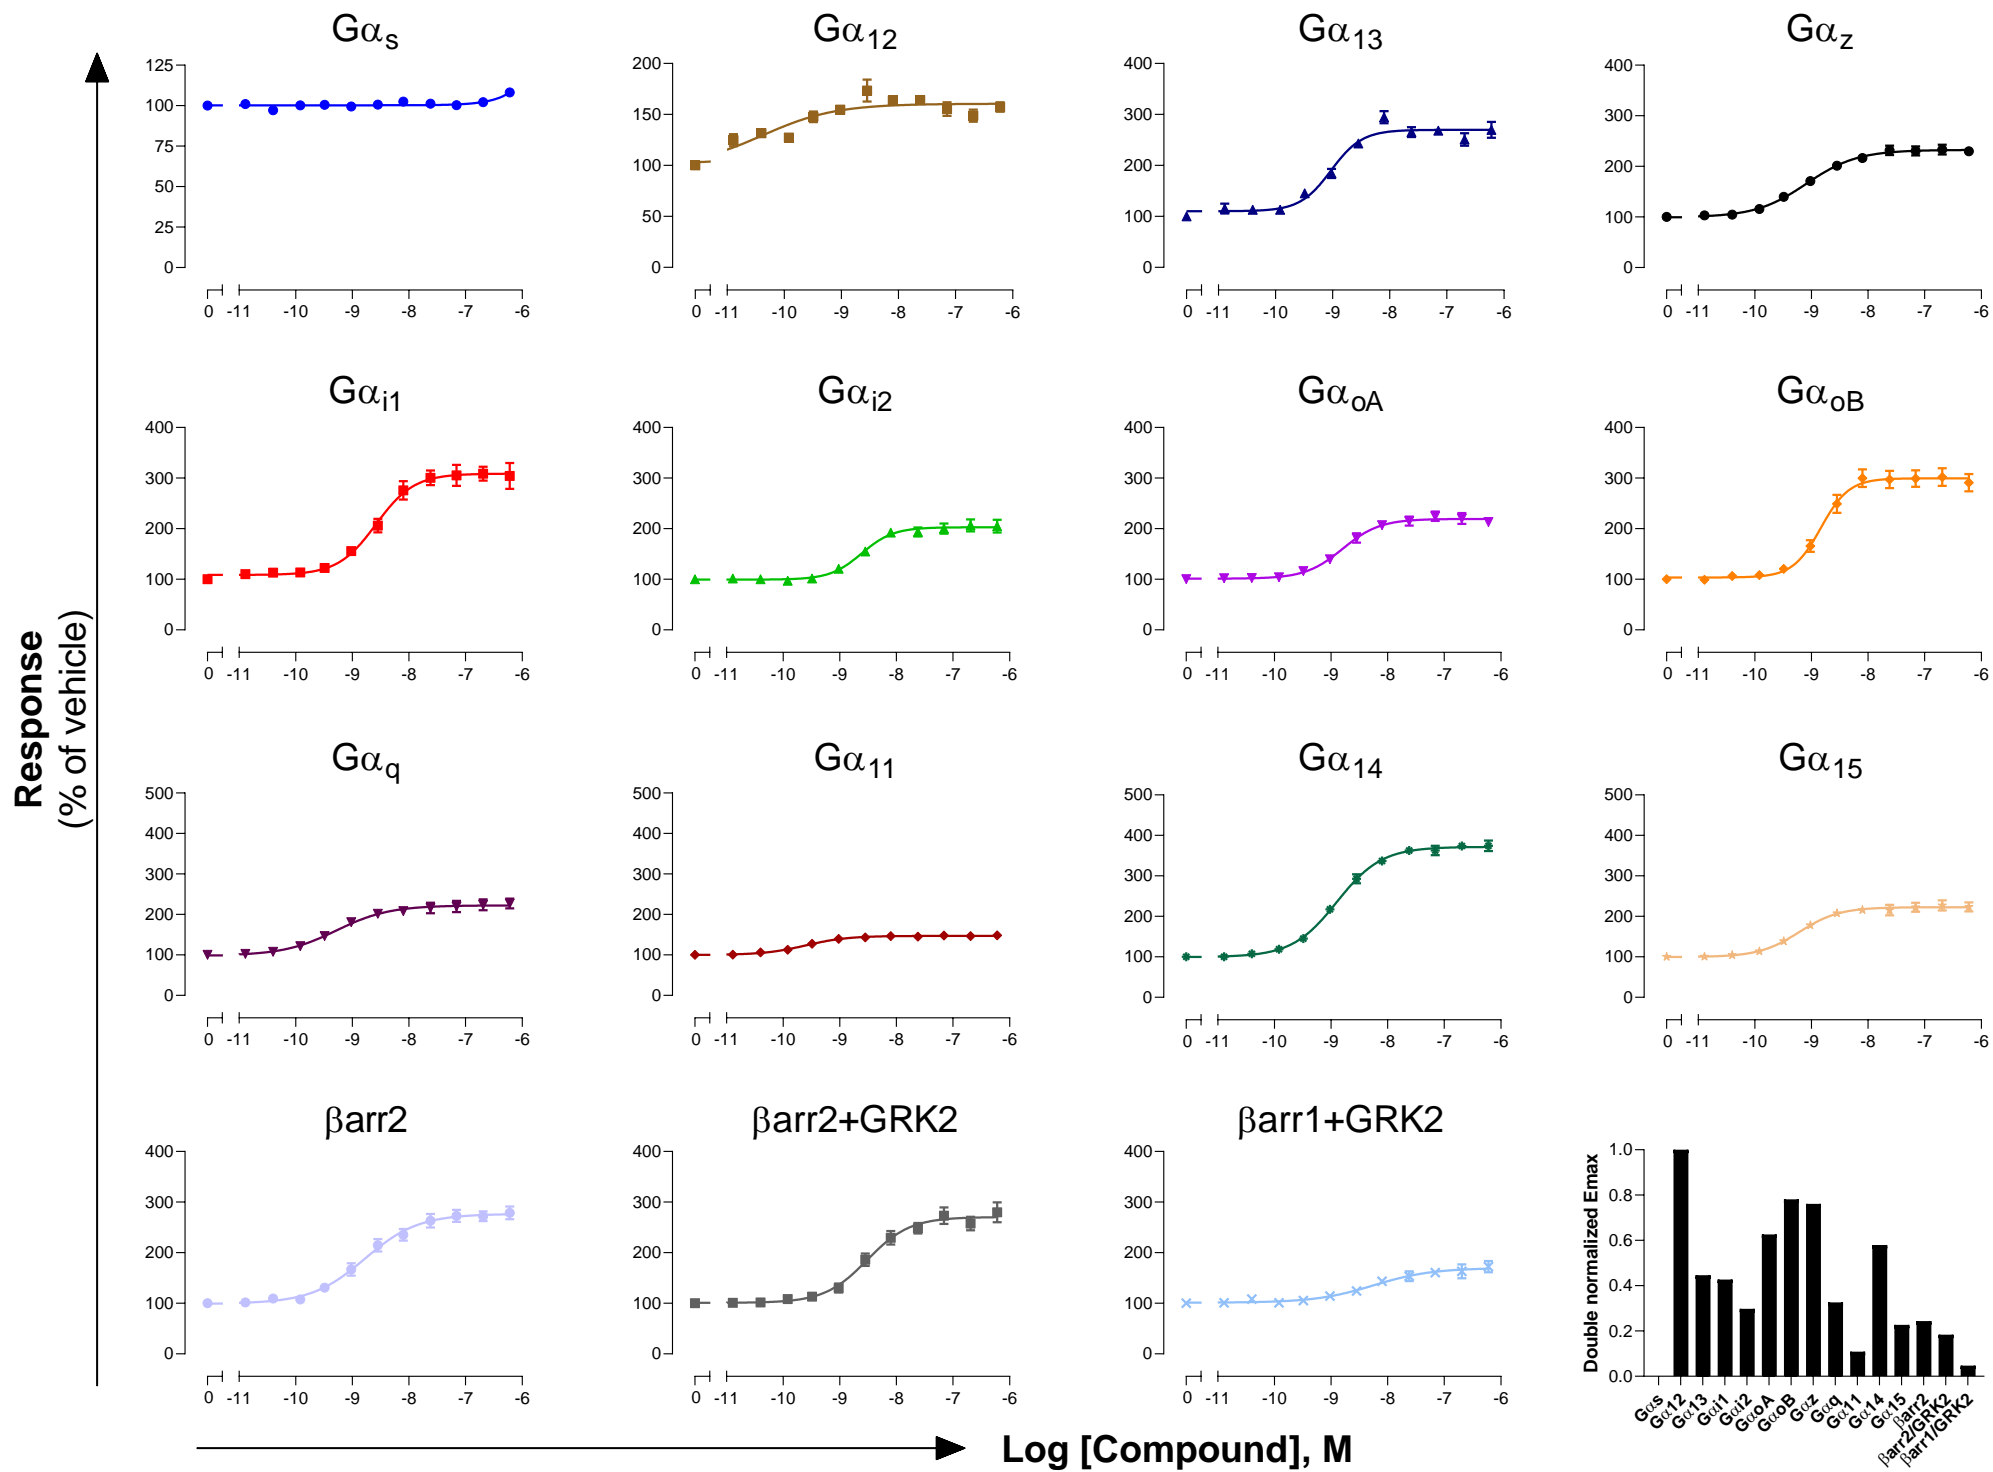

**GPCR: GIP**  
**Ligand: GIP**

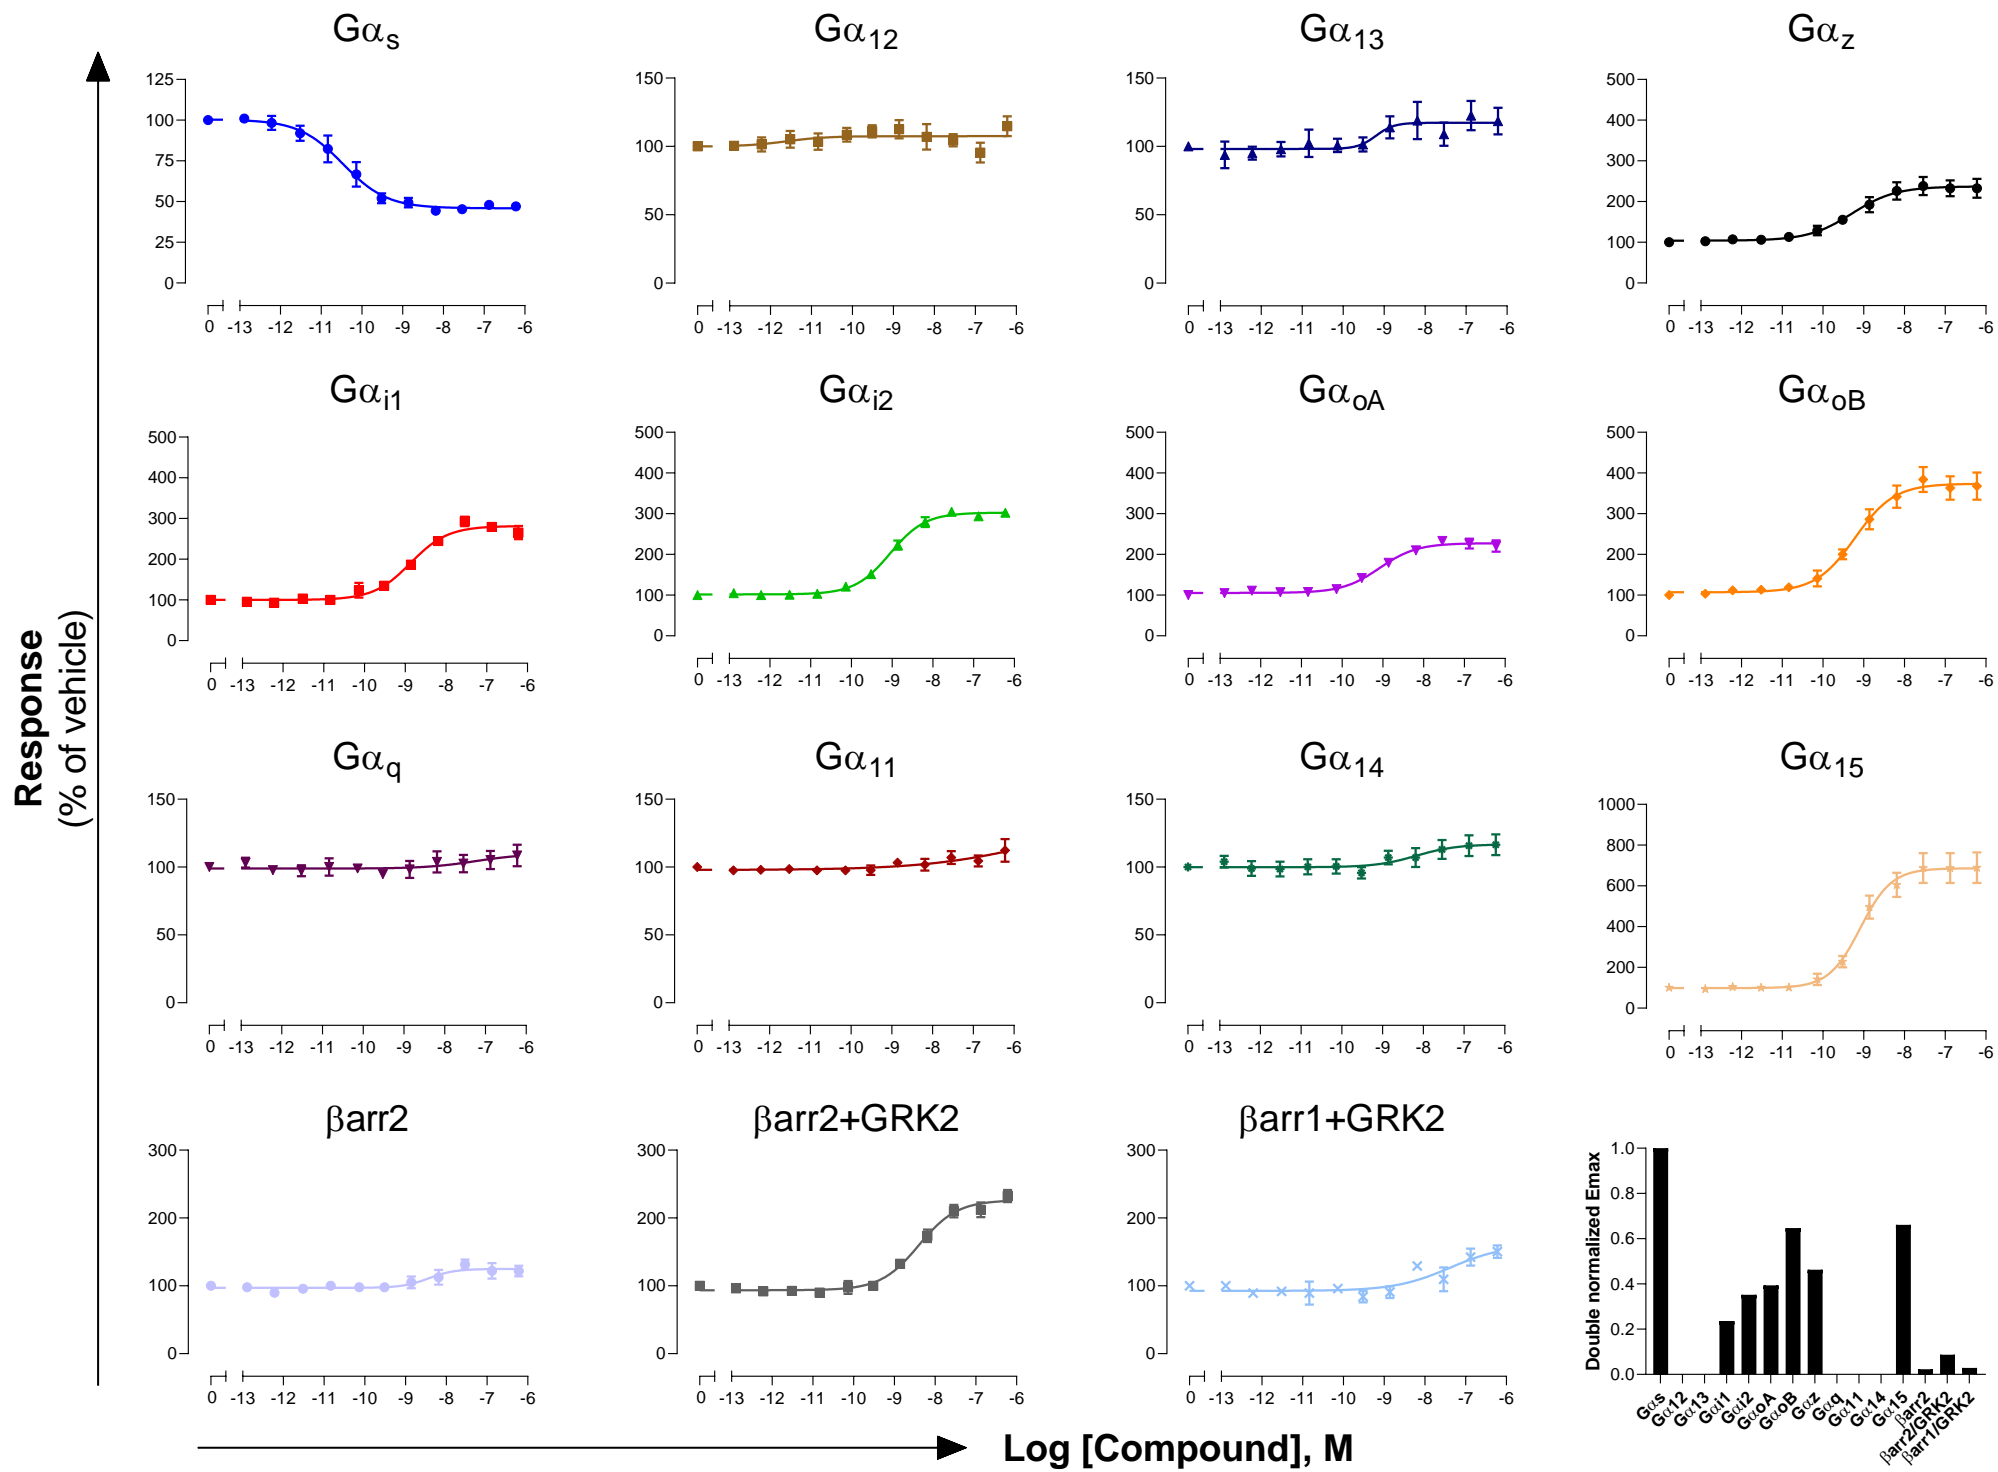

**GPCR: GLP-1**  
**Ligand: GLP-1 (7-36)**

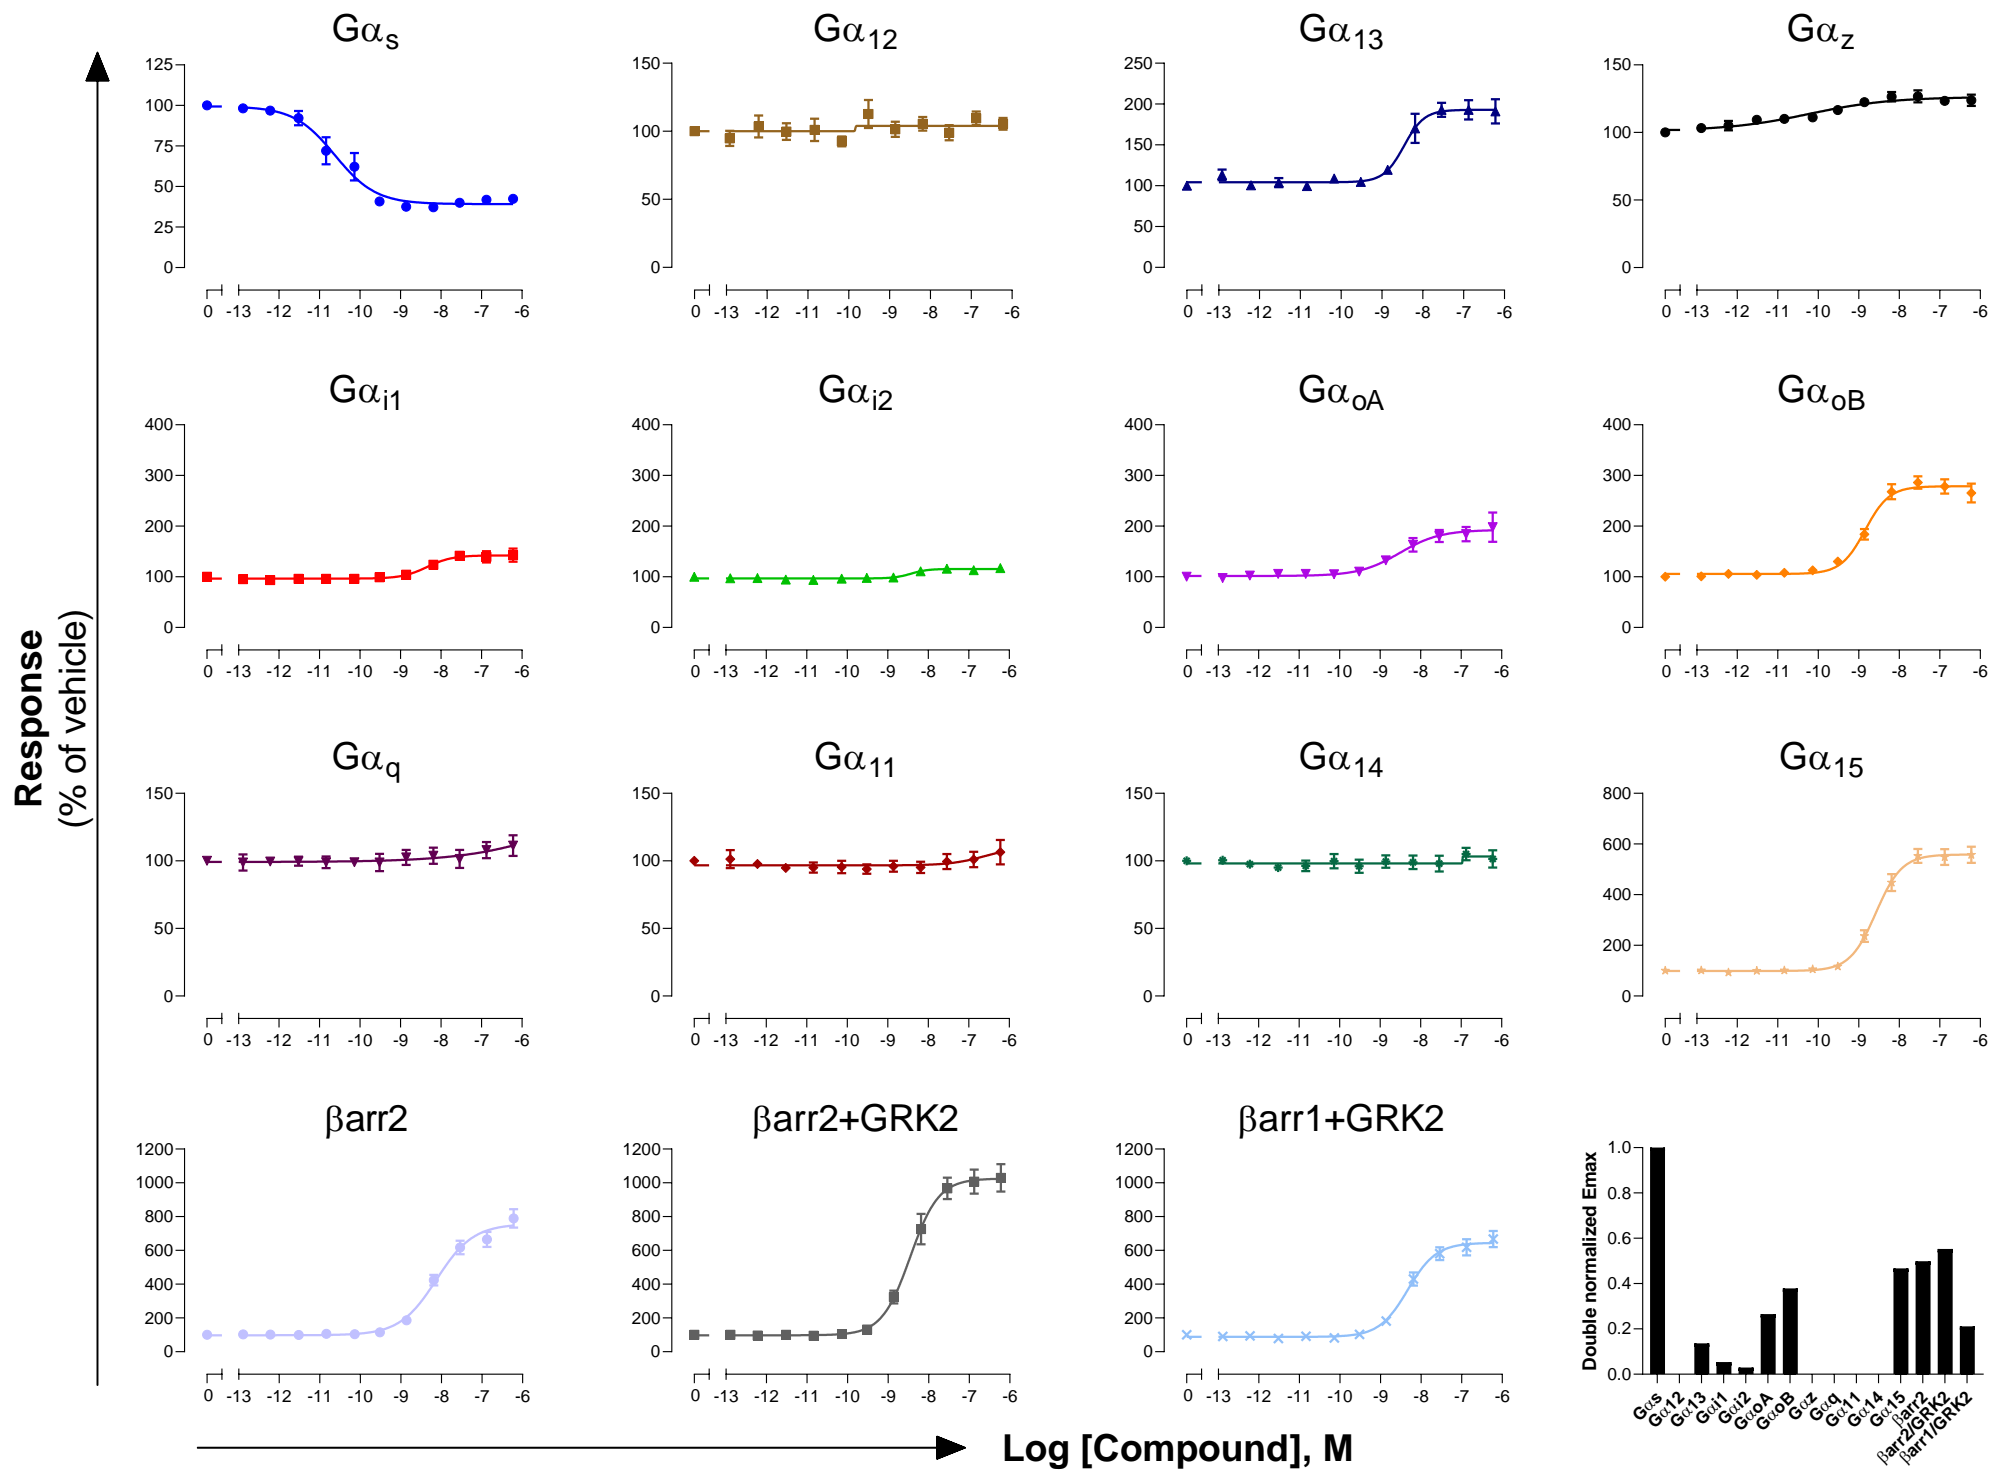

**GPCR: GLP-2**  
**Ligand: GLP-2 (1-33)**

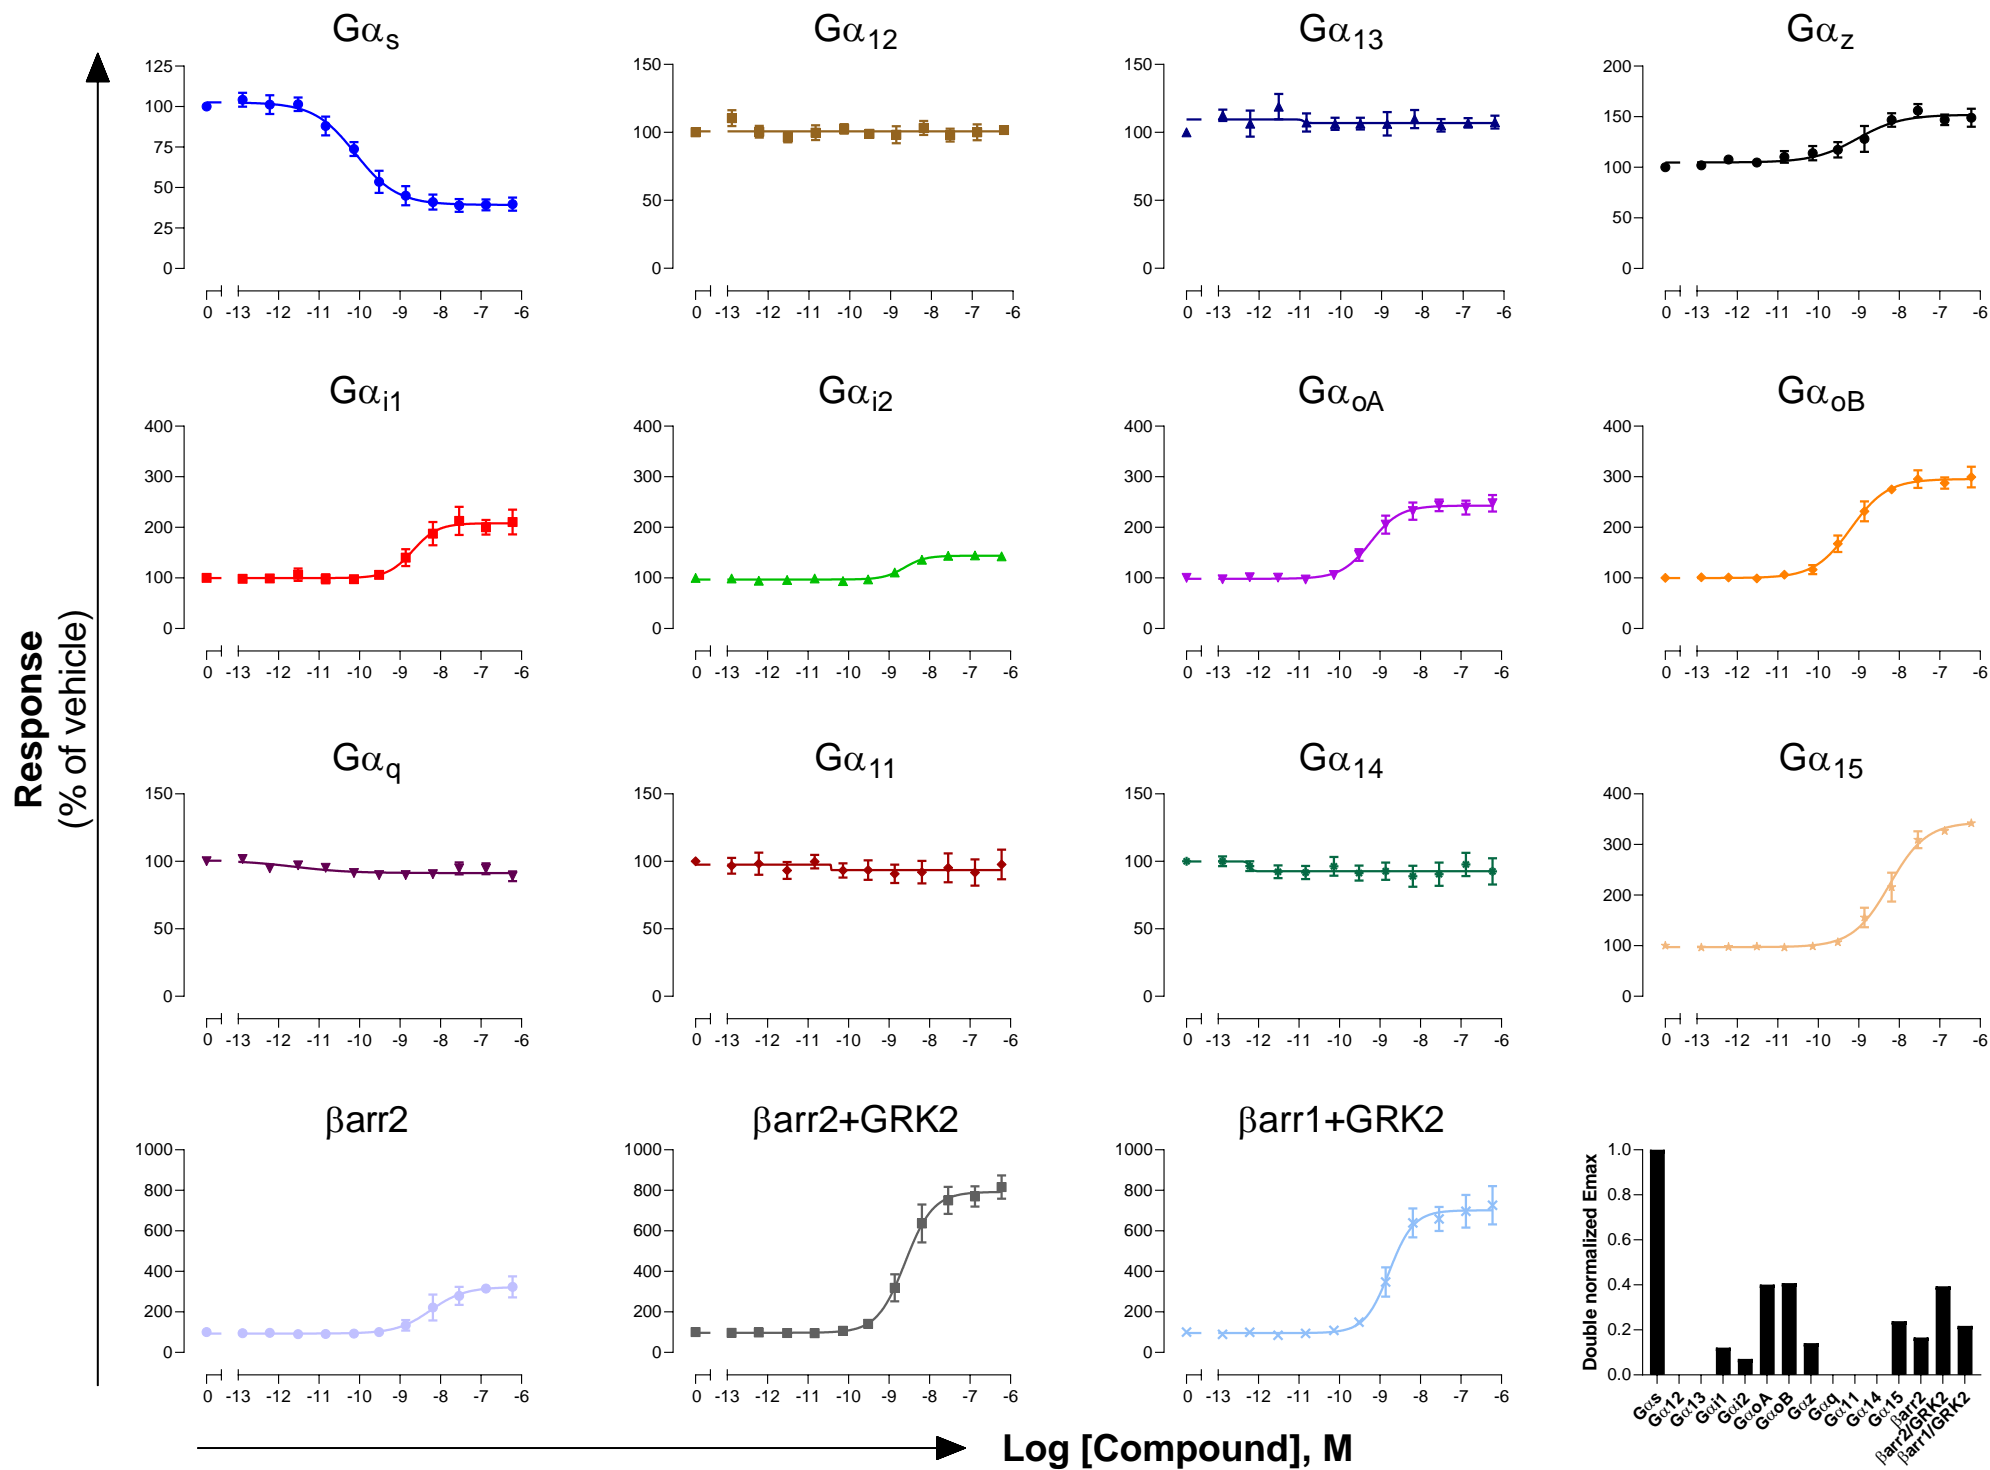

**GPCR: GnRHR**  
**Ligand: GnRH**

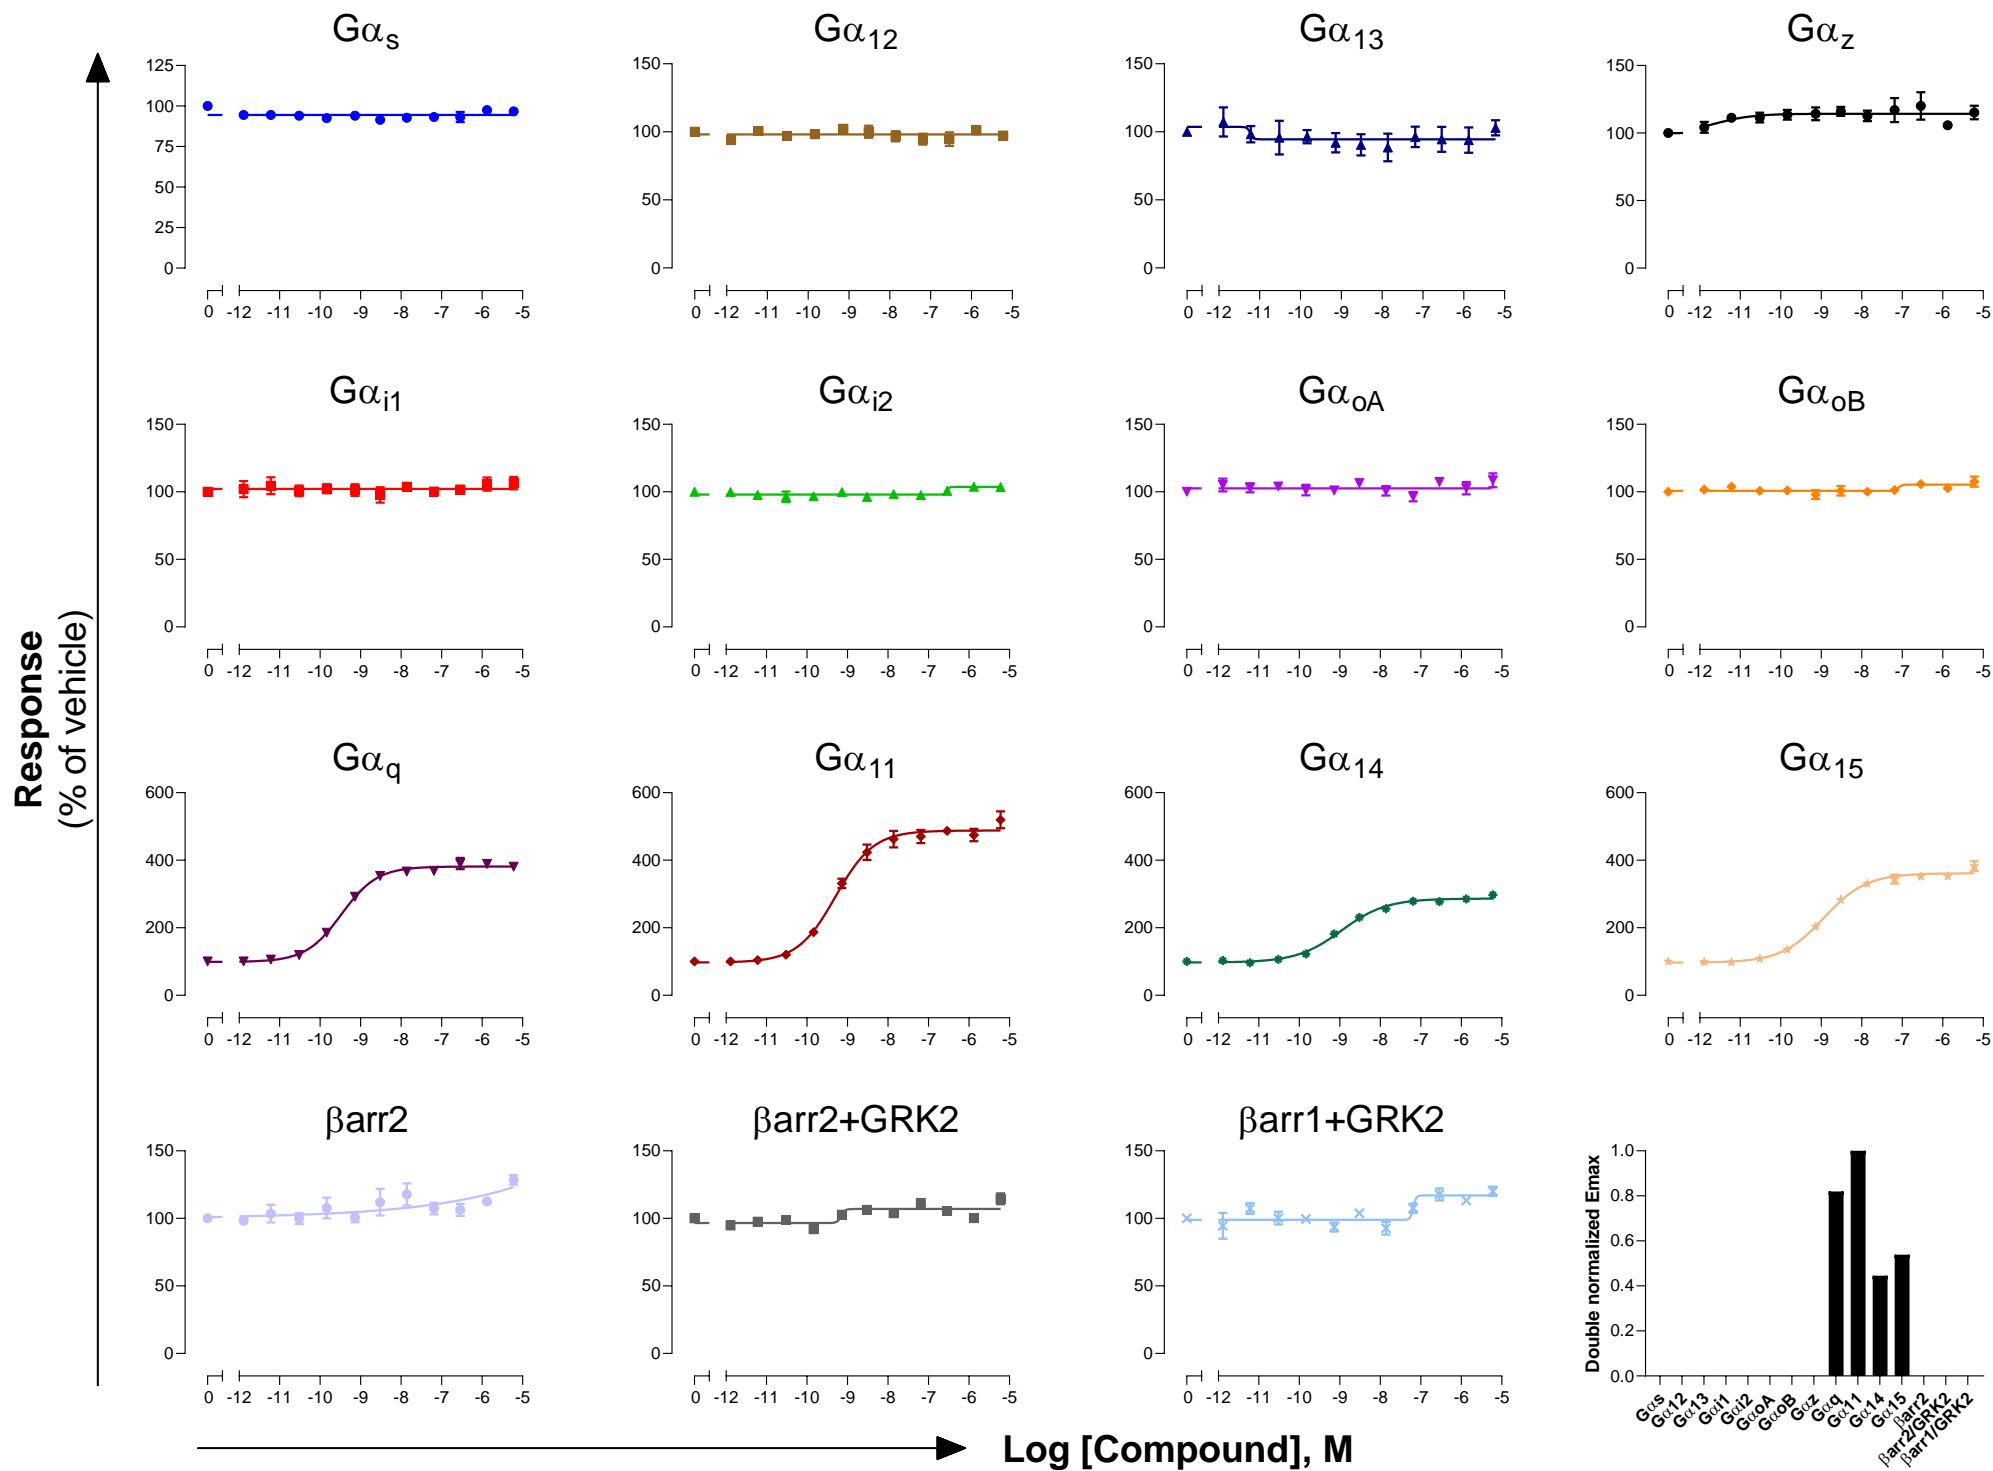



# GPCR: GPBA

Ligand: Litochoic acid

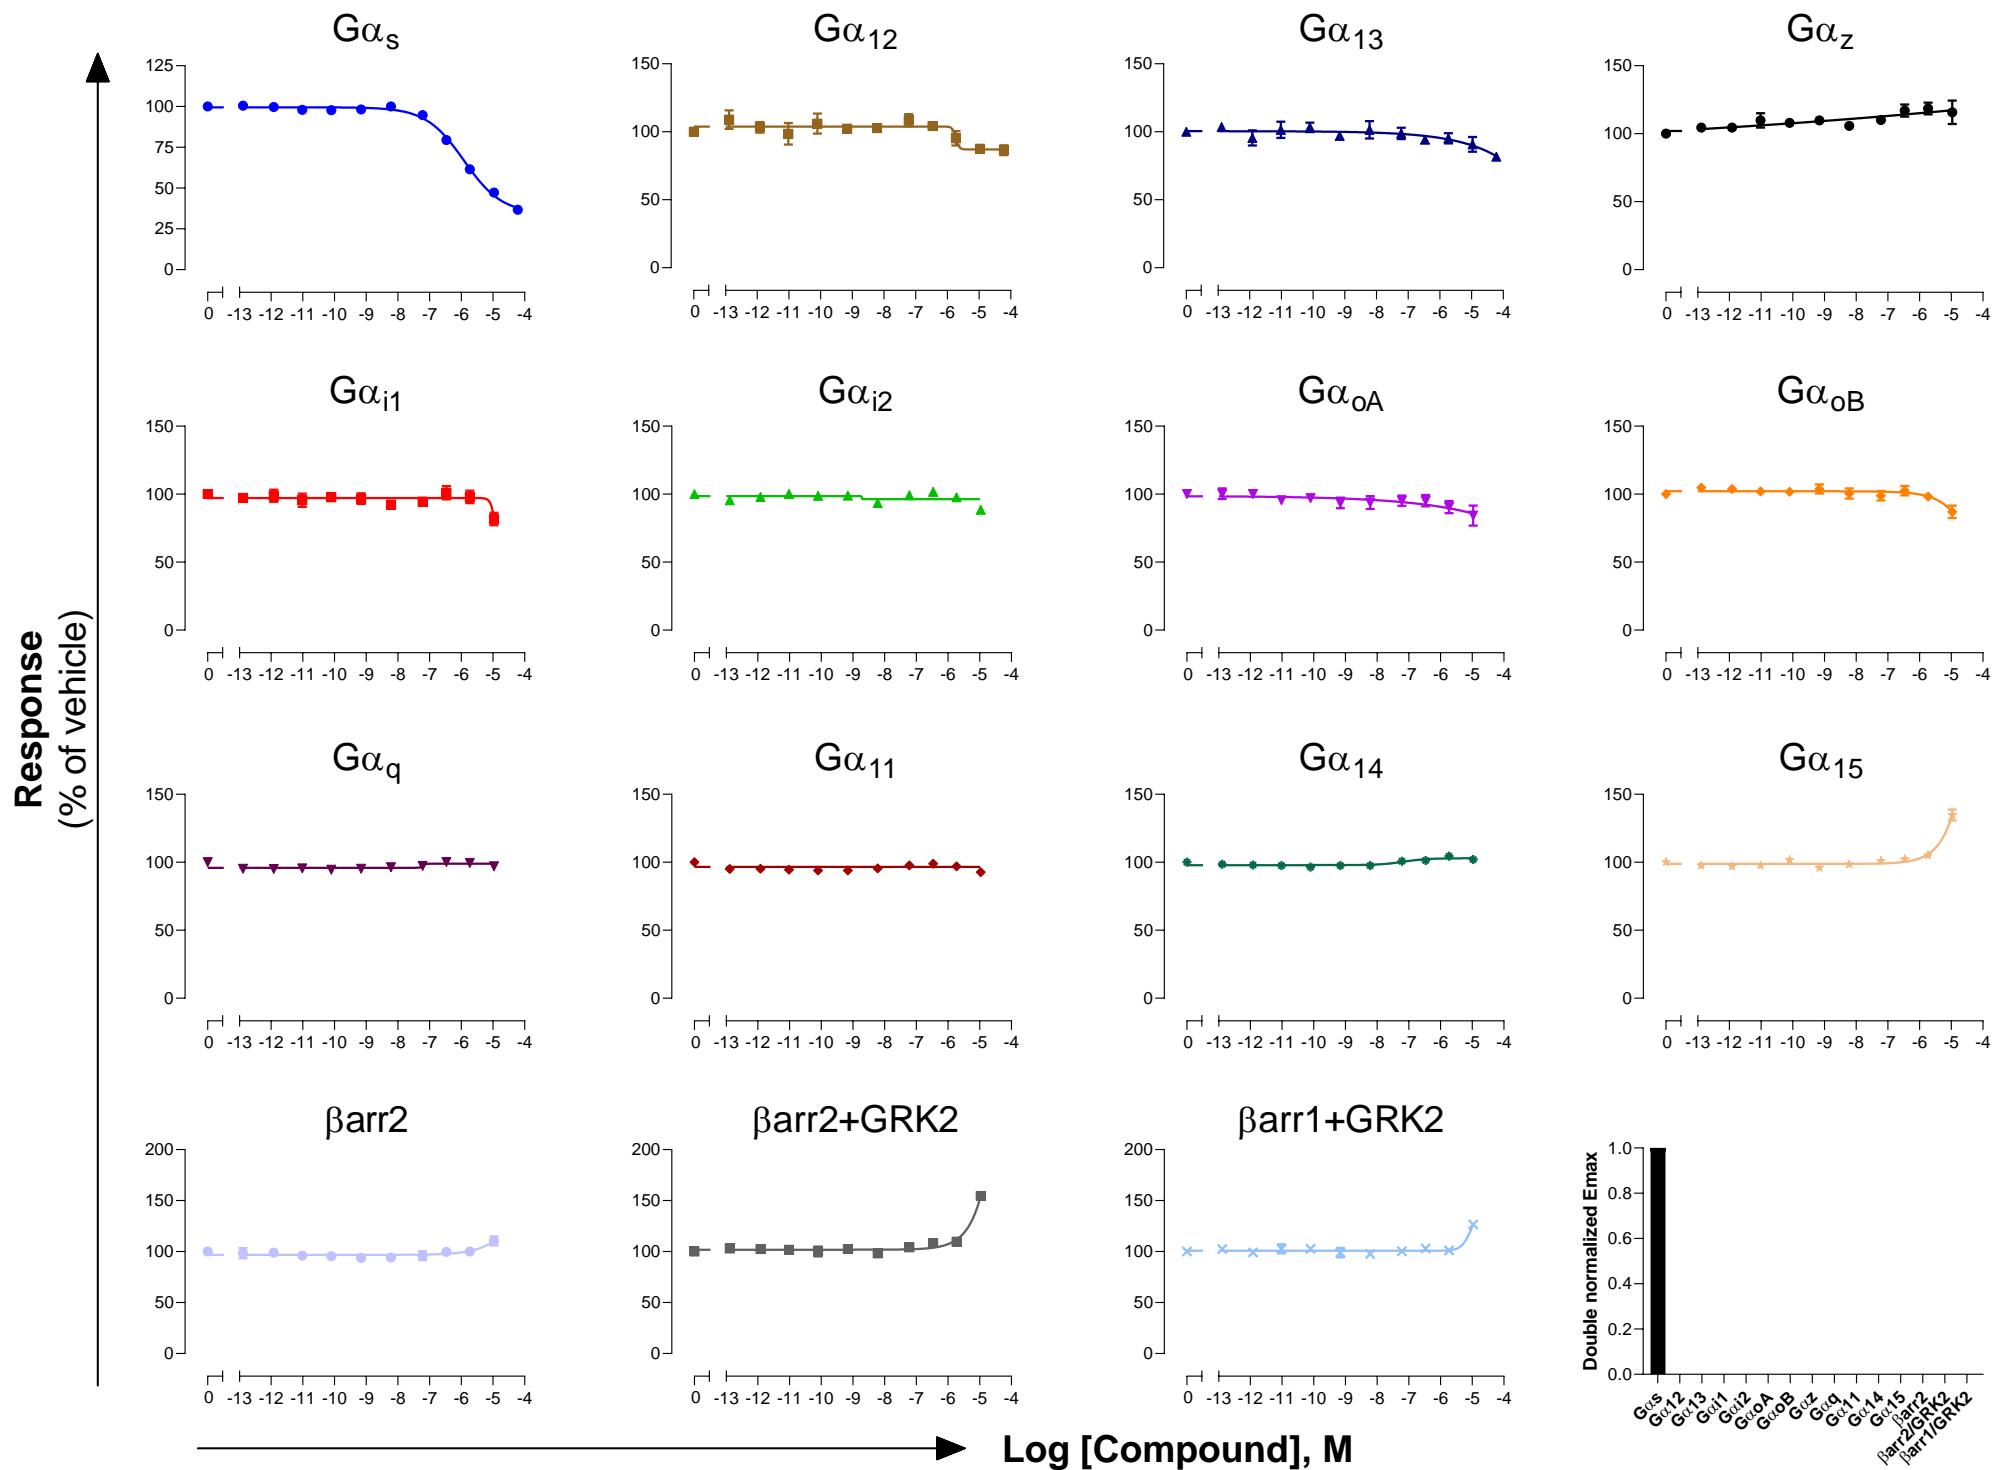

# GPCR: GPR39

Ligand: Zn<sup>2+</sup>

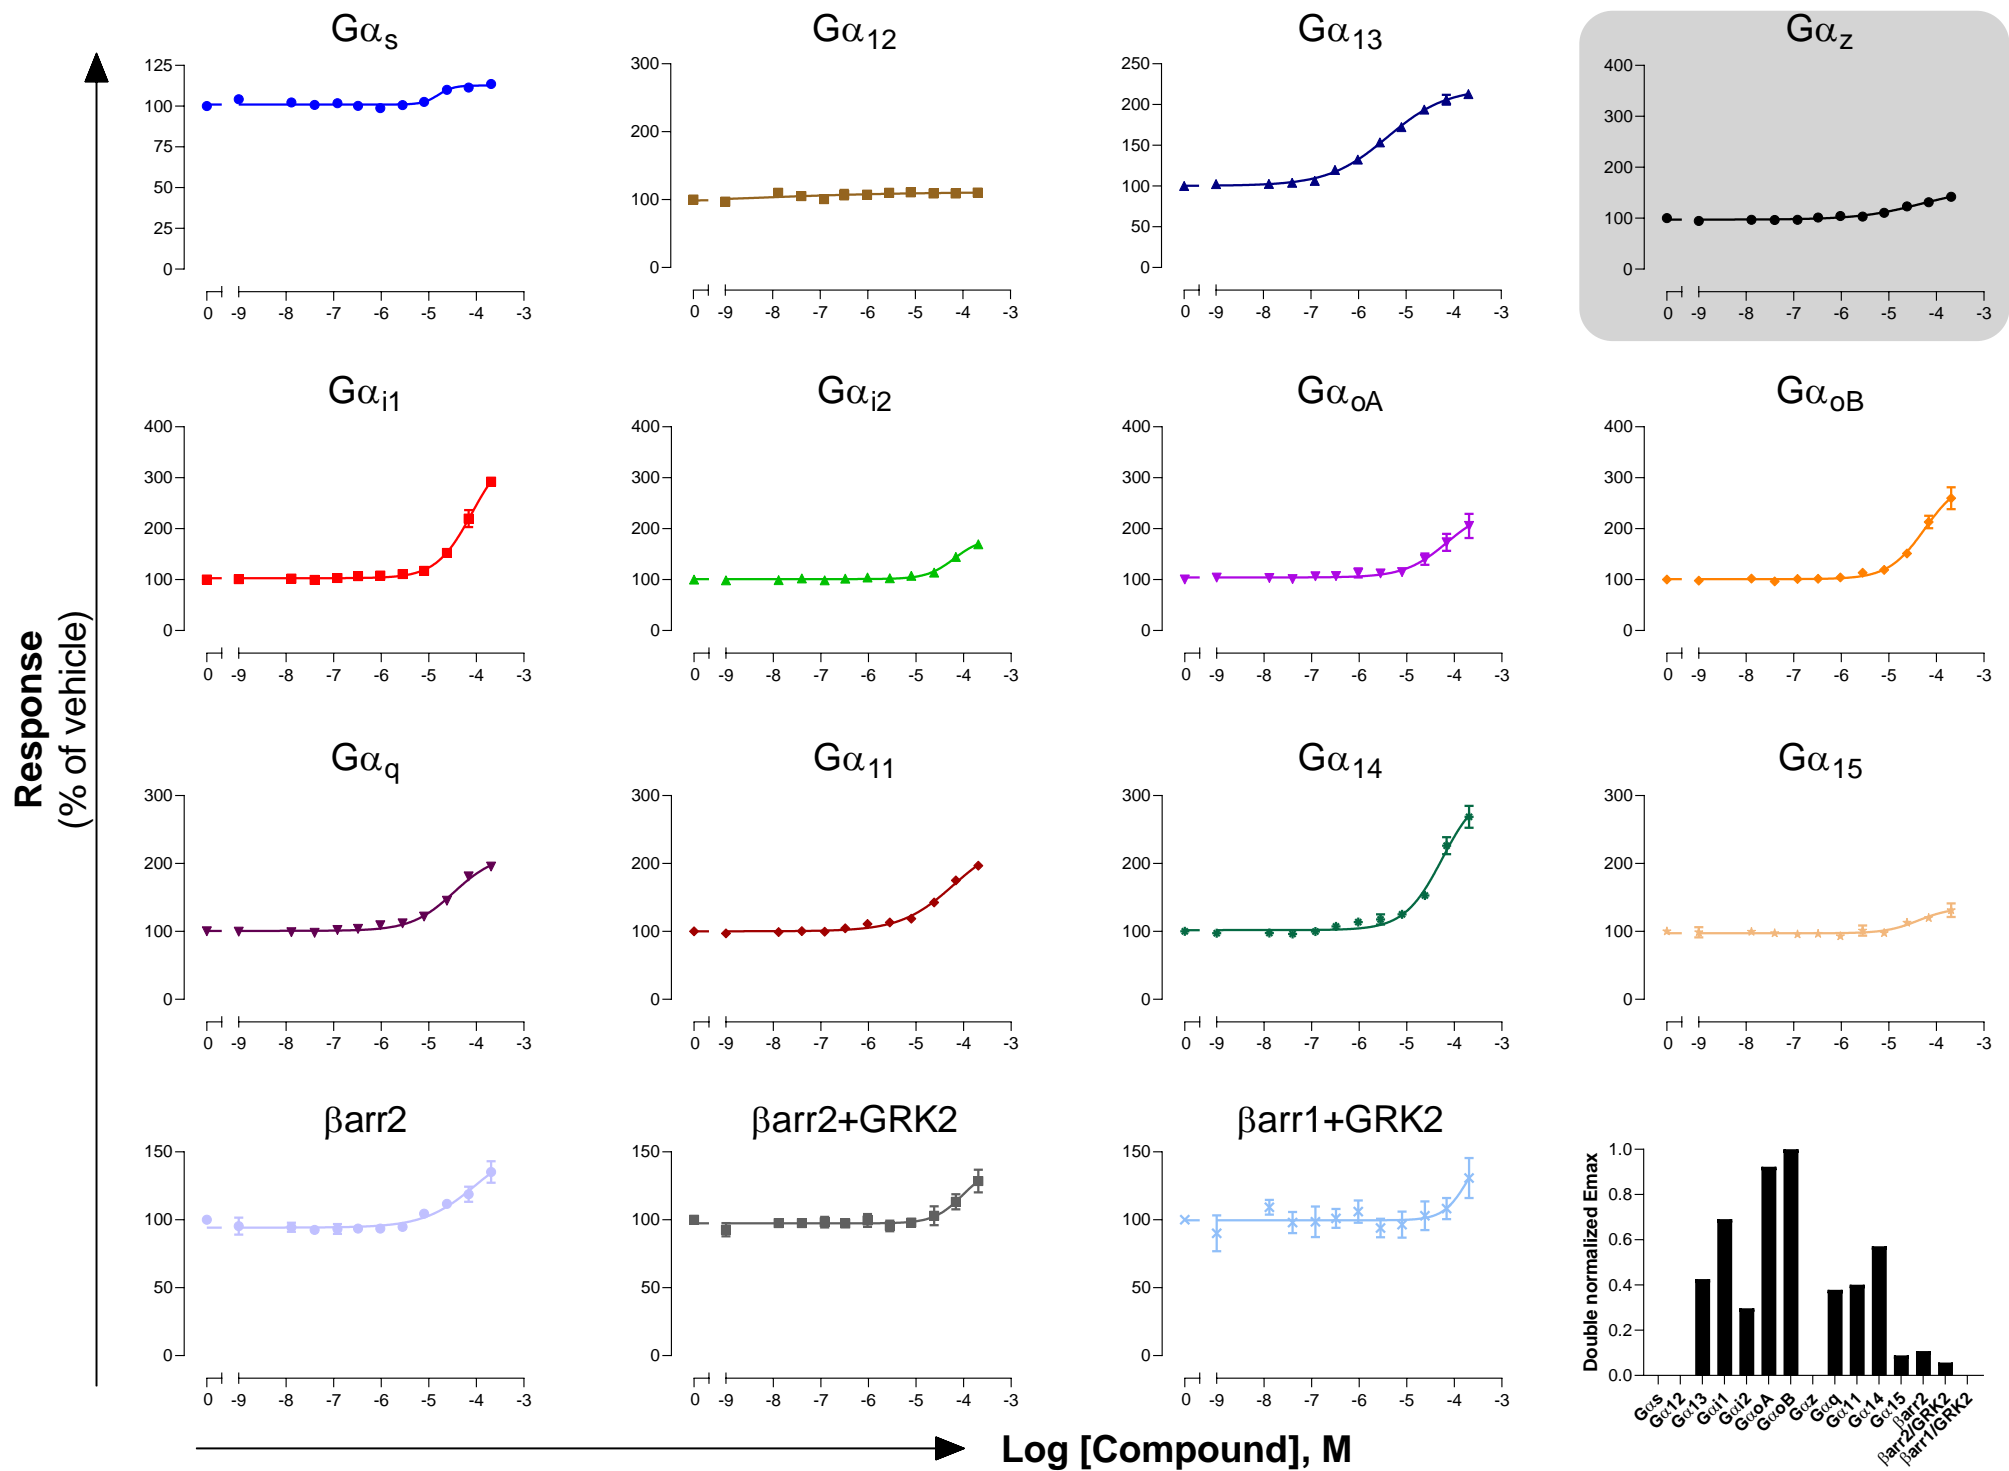

# GPCR: GPR4

## Ligand: Protons (pH)

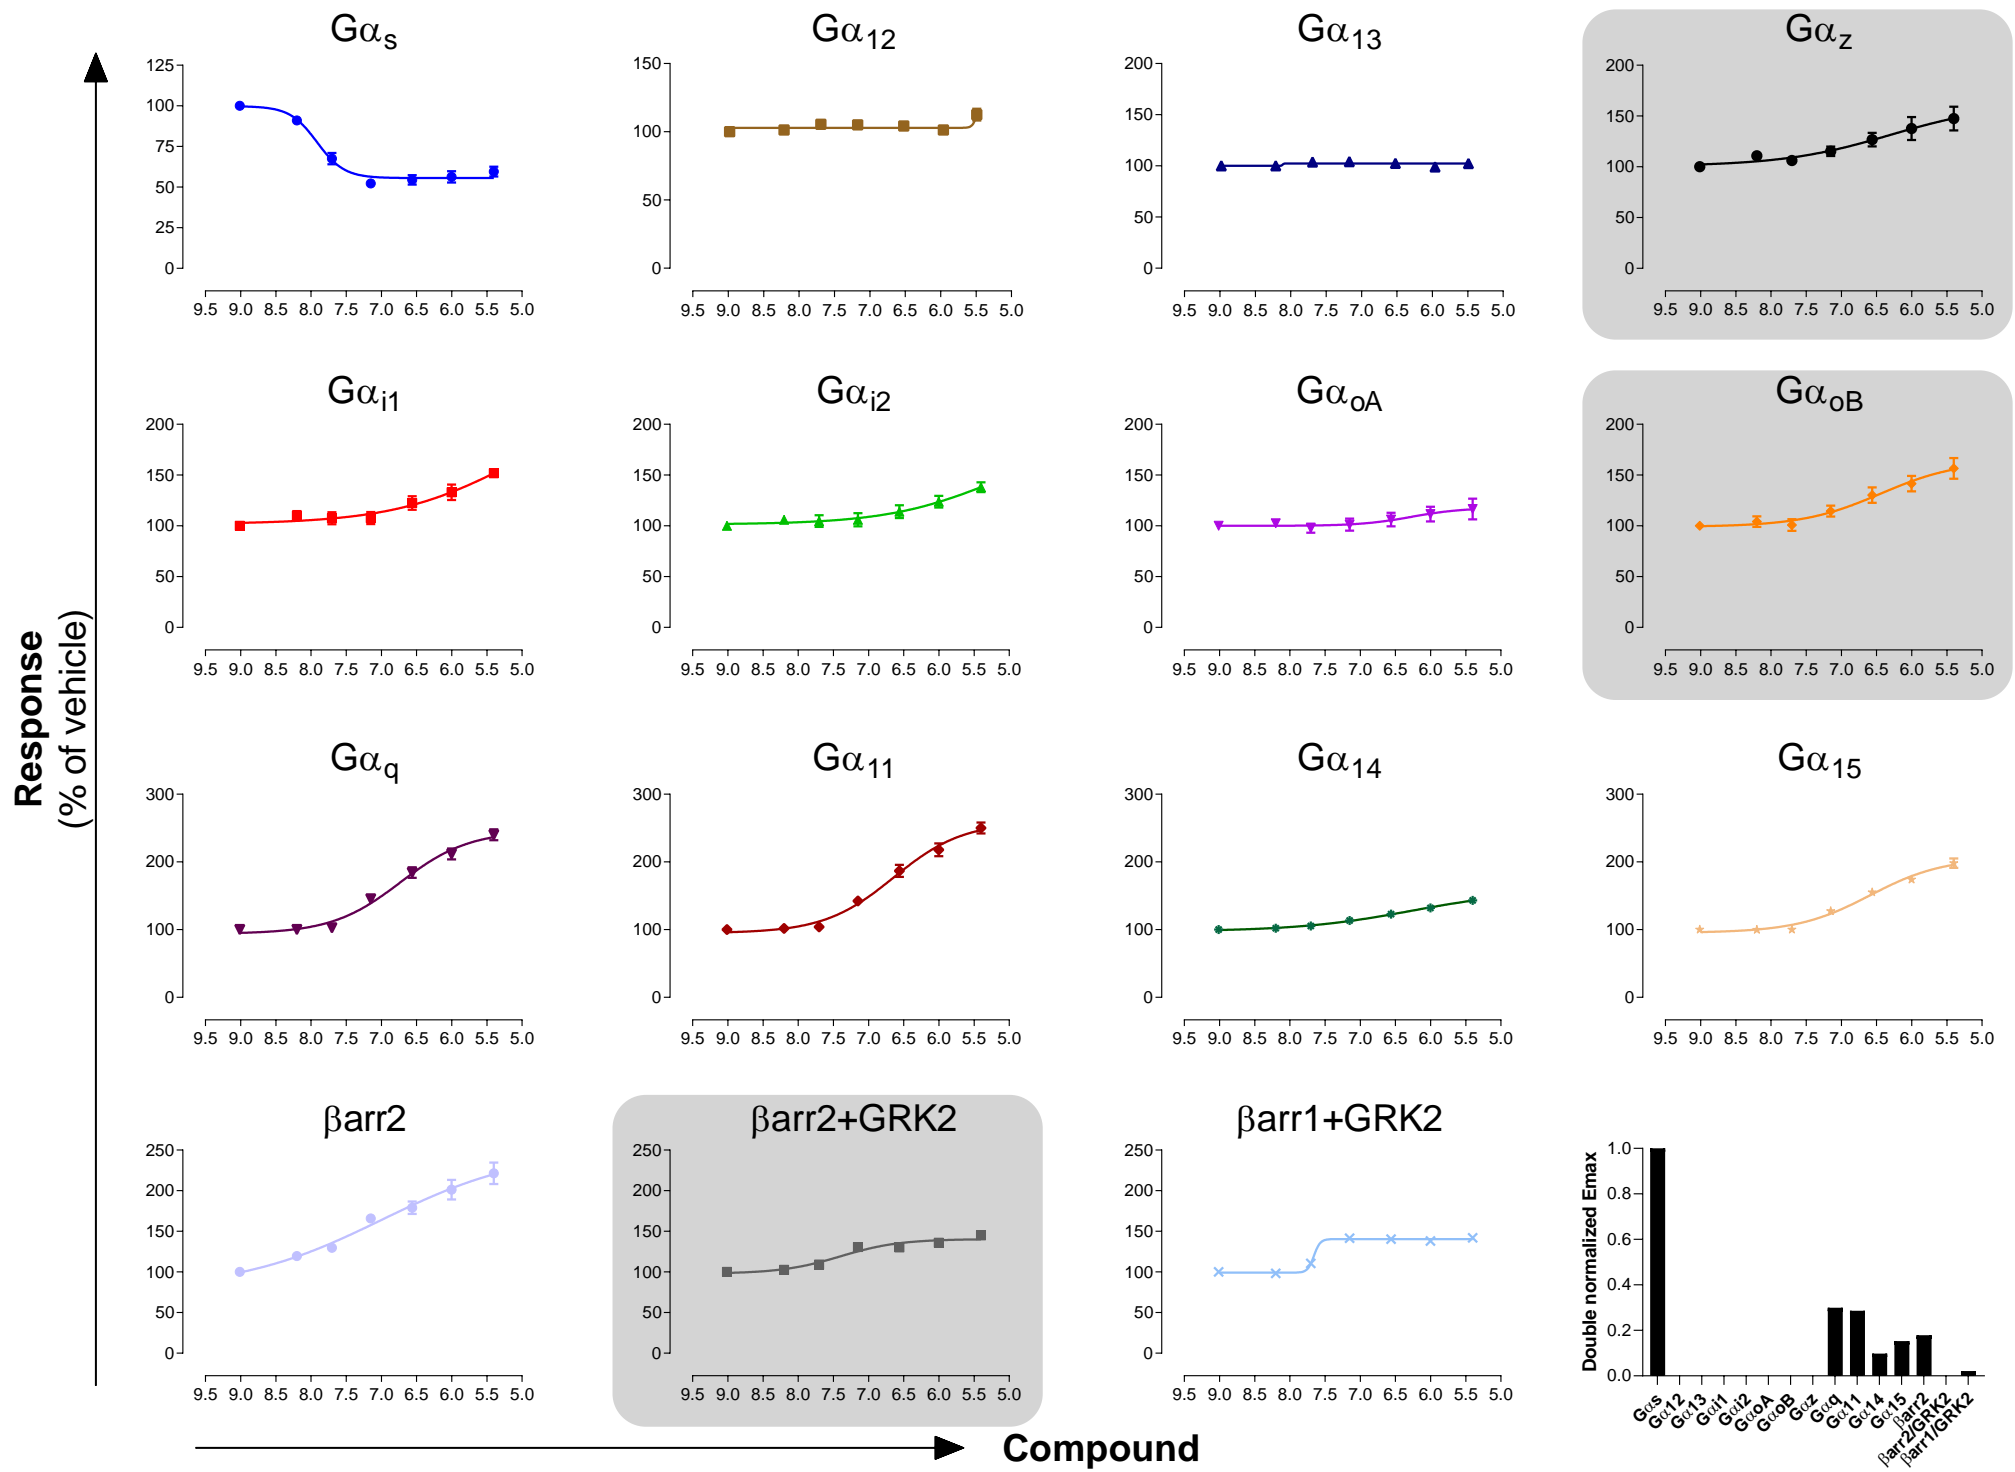

# GPCR: GPR65

## Ligand: protons (pH)

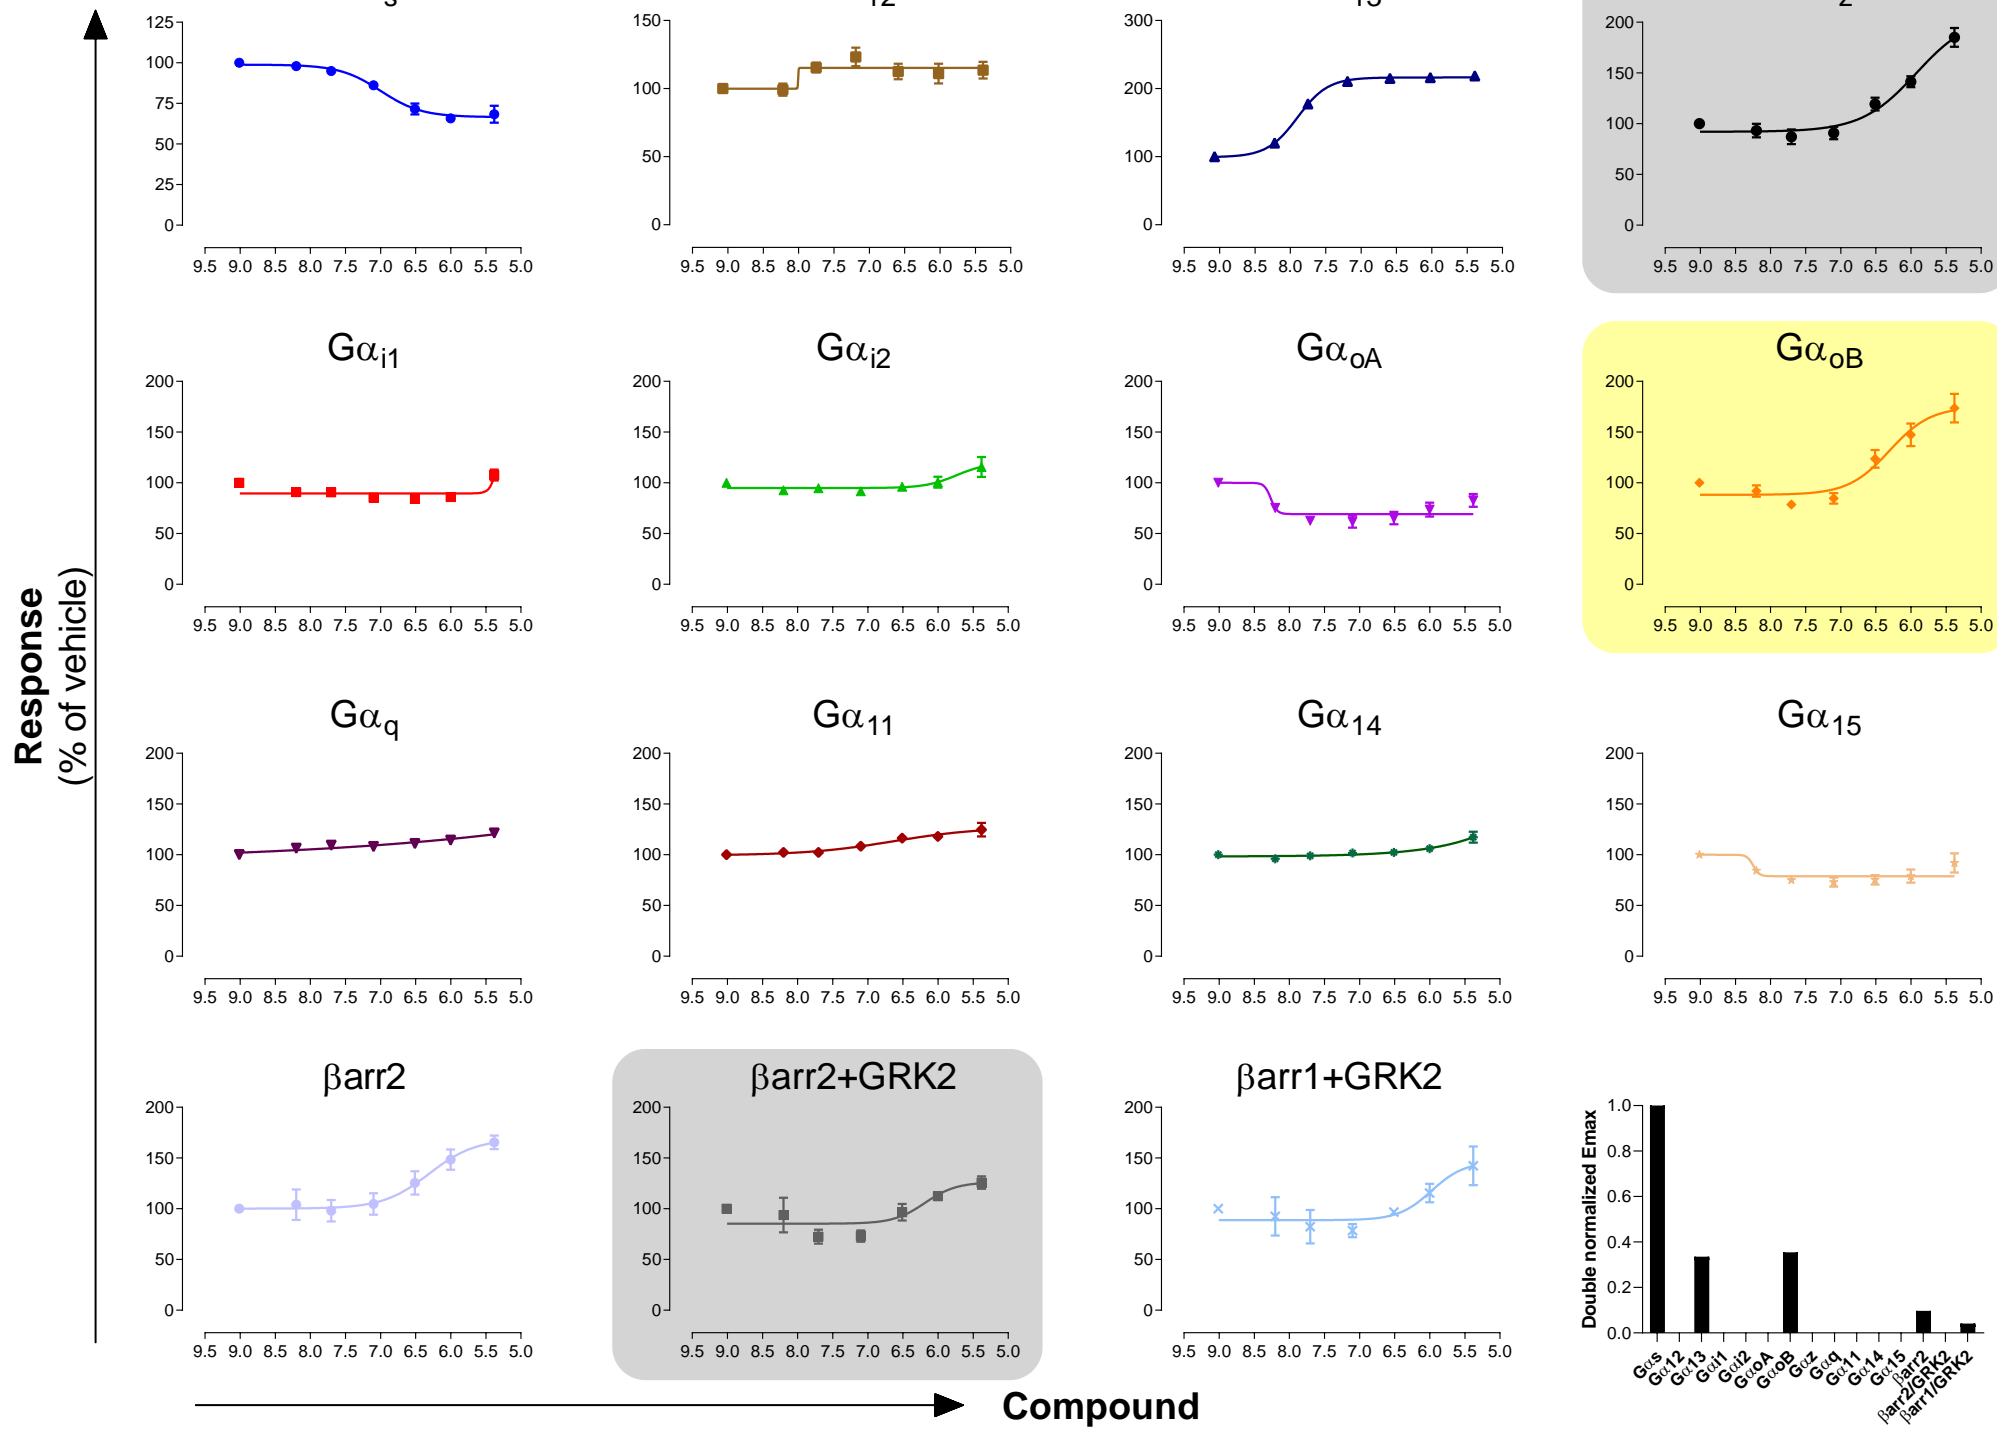

# GPCR: GPR68

## Ligand: Protons (pH)

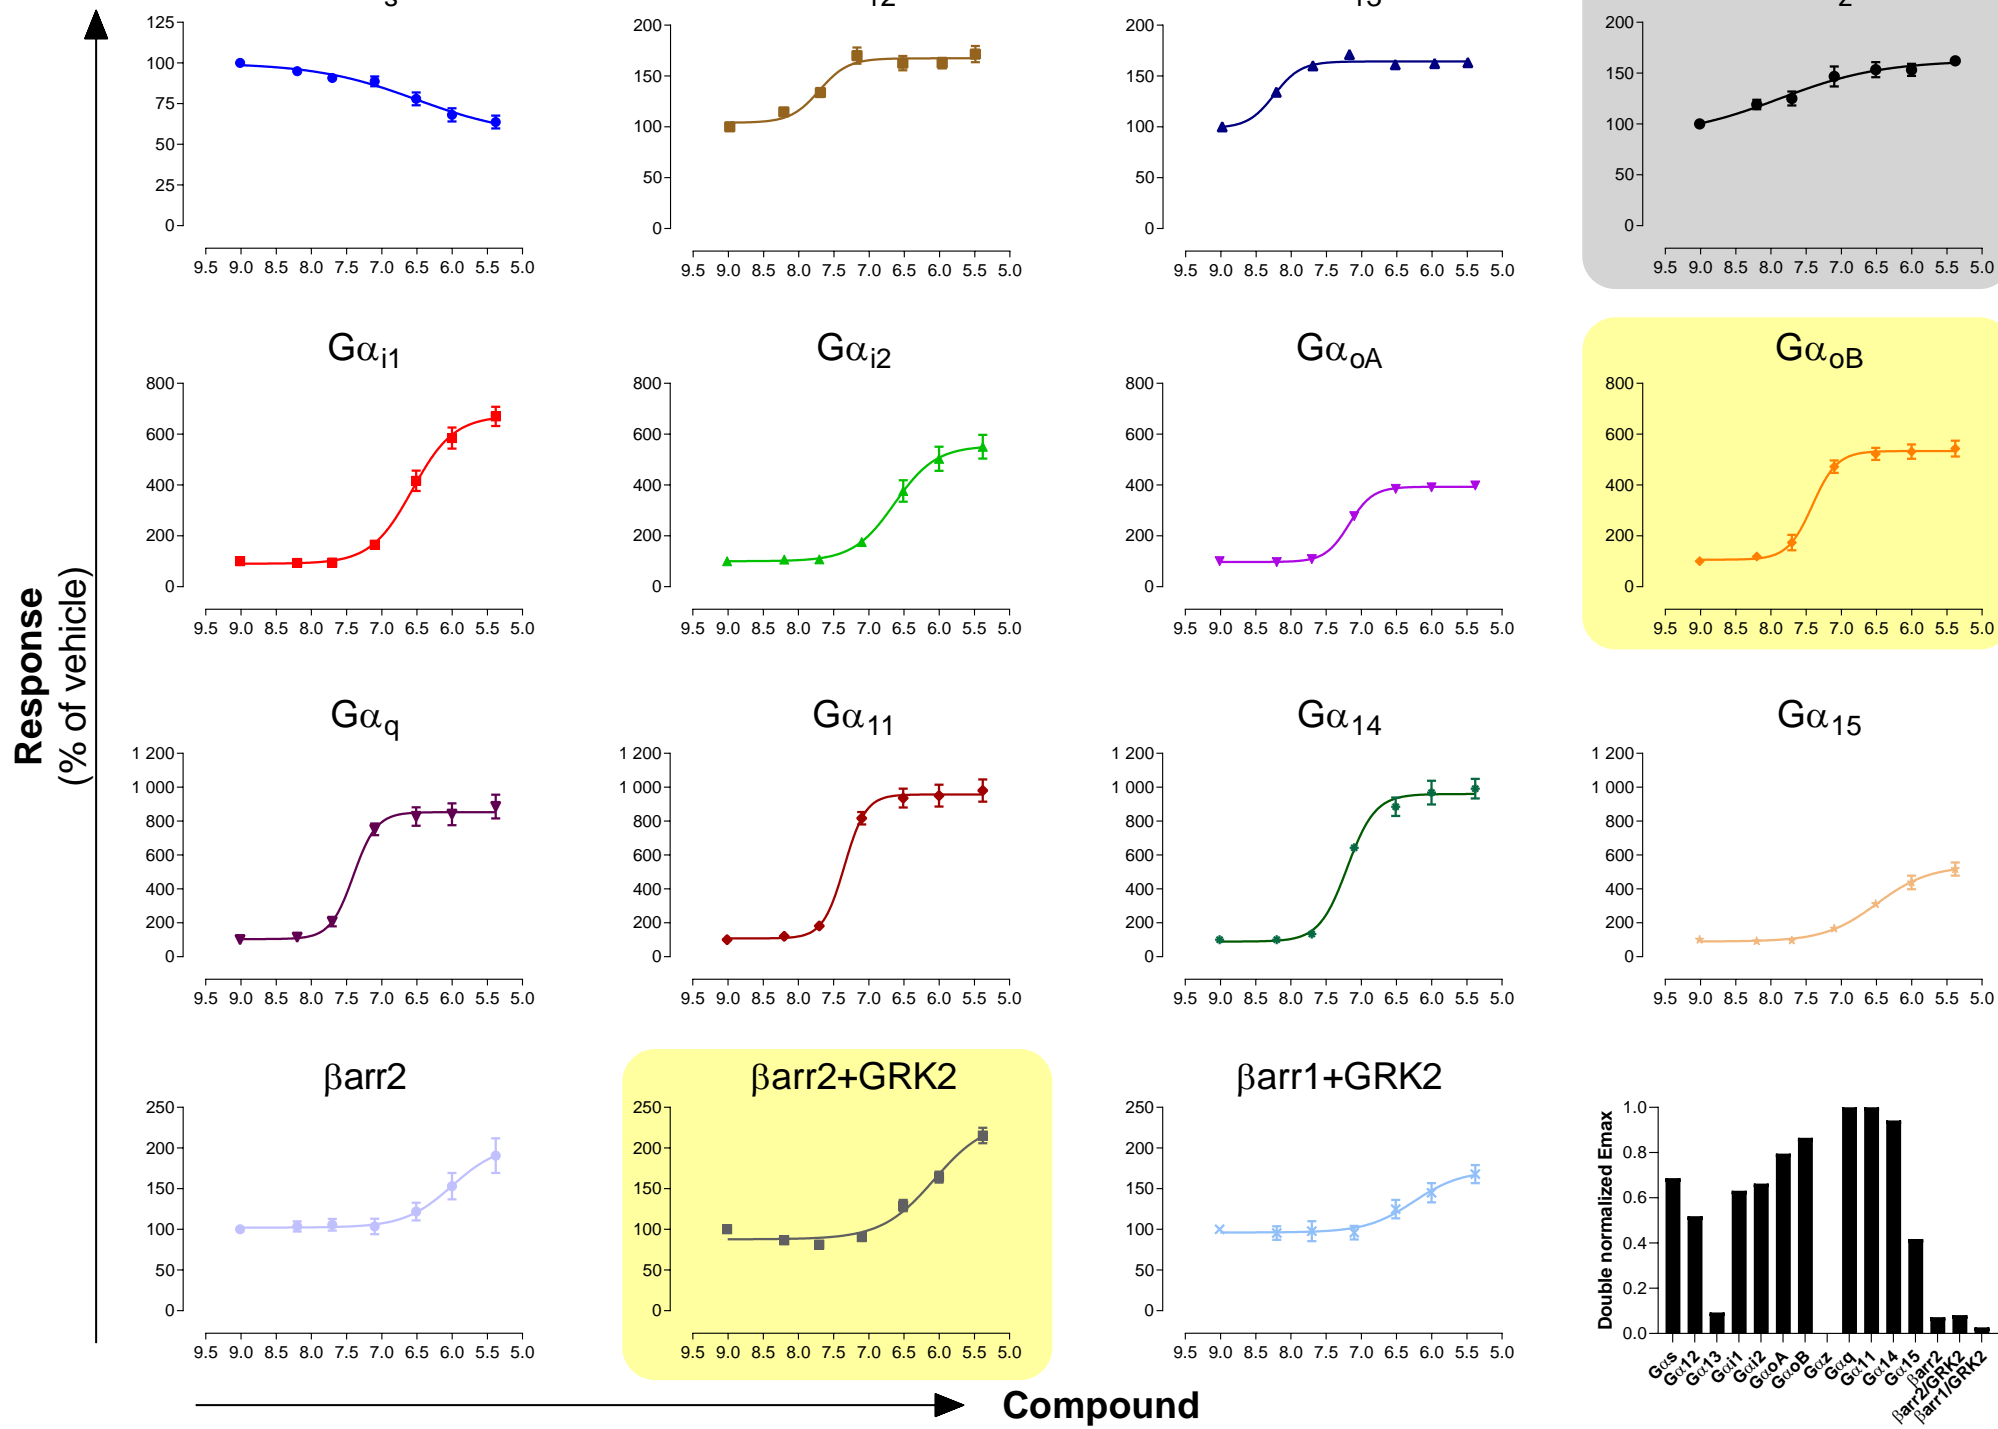

# GPCR: GPR84

Ligand: Undecanoic acid

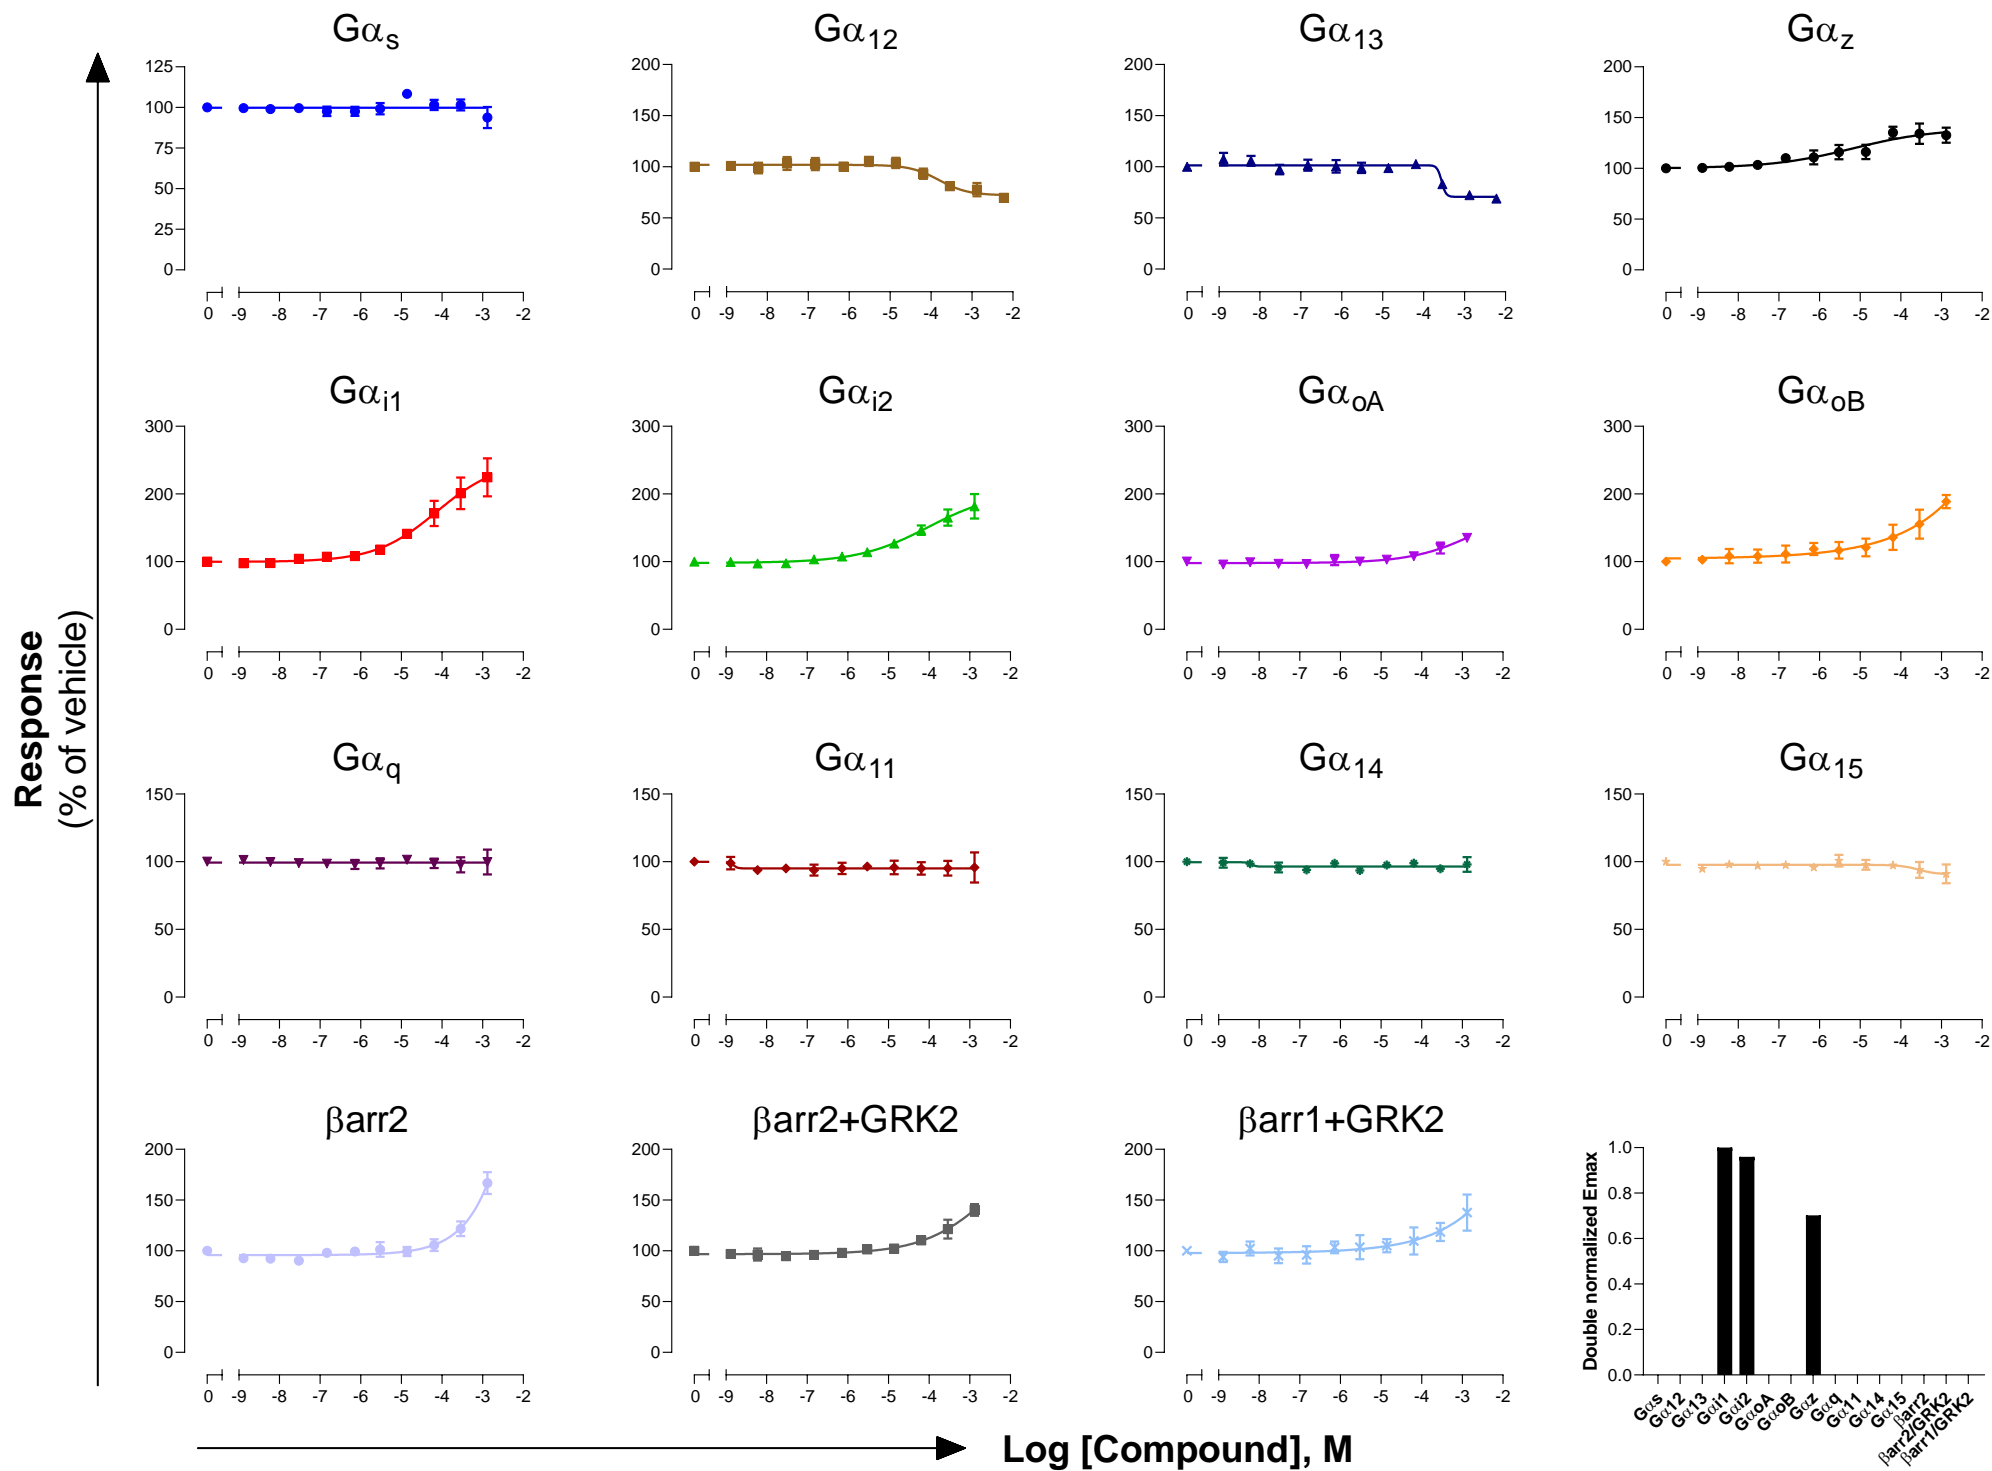

# GPCR: GPR183

Ligand: 7 $\alpha$ -25 dihydroxycholesterol

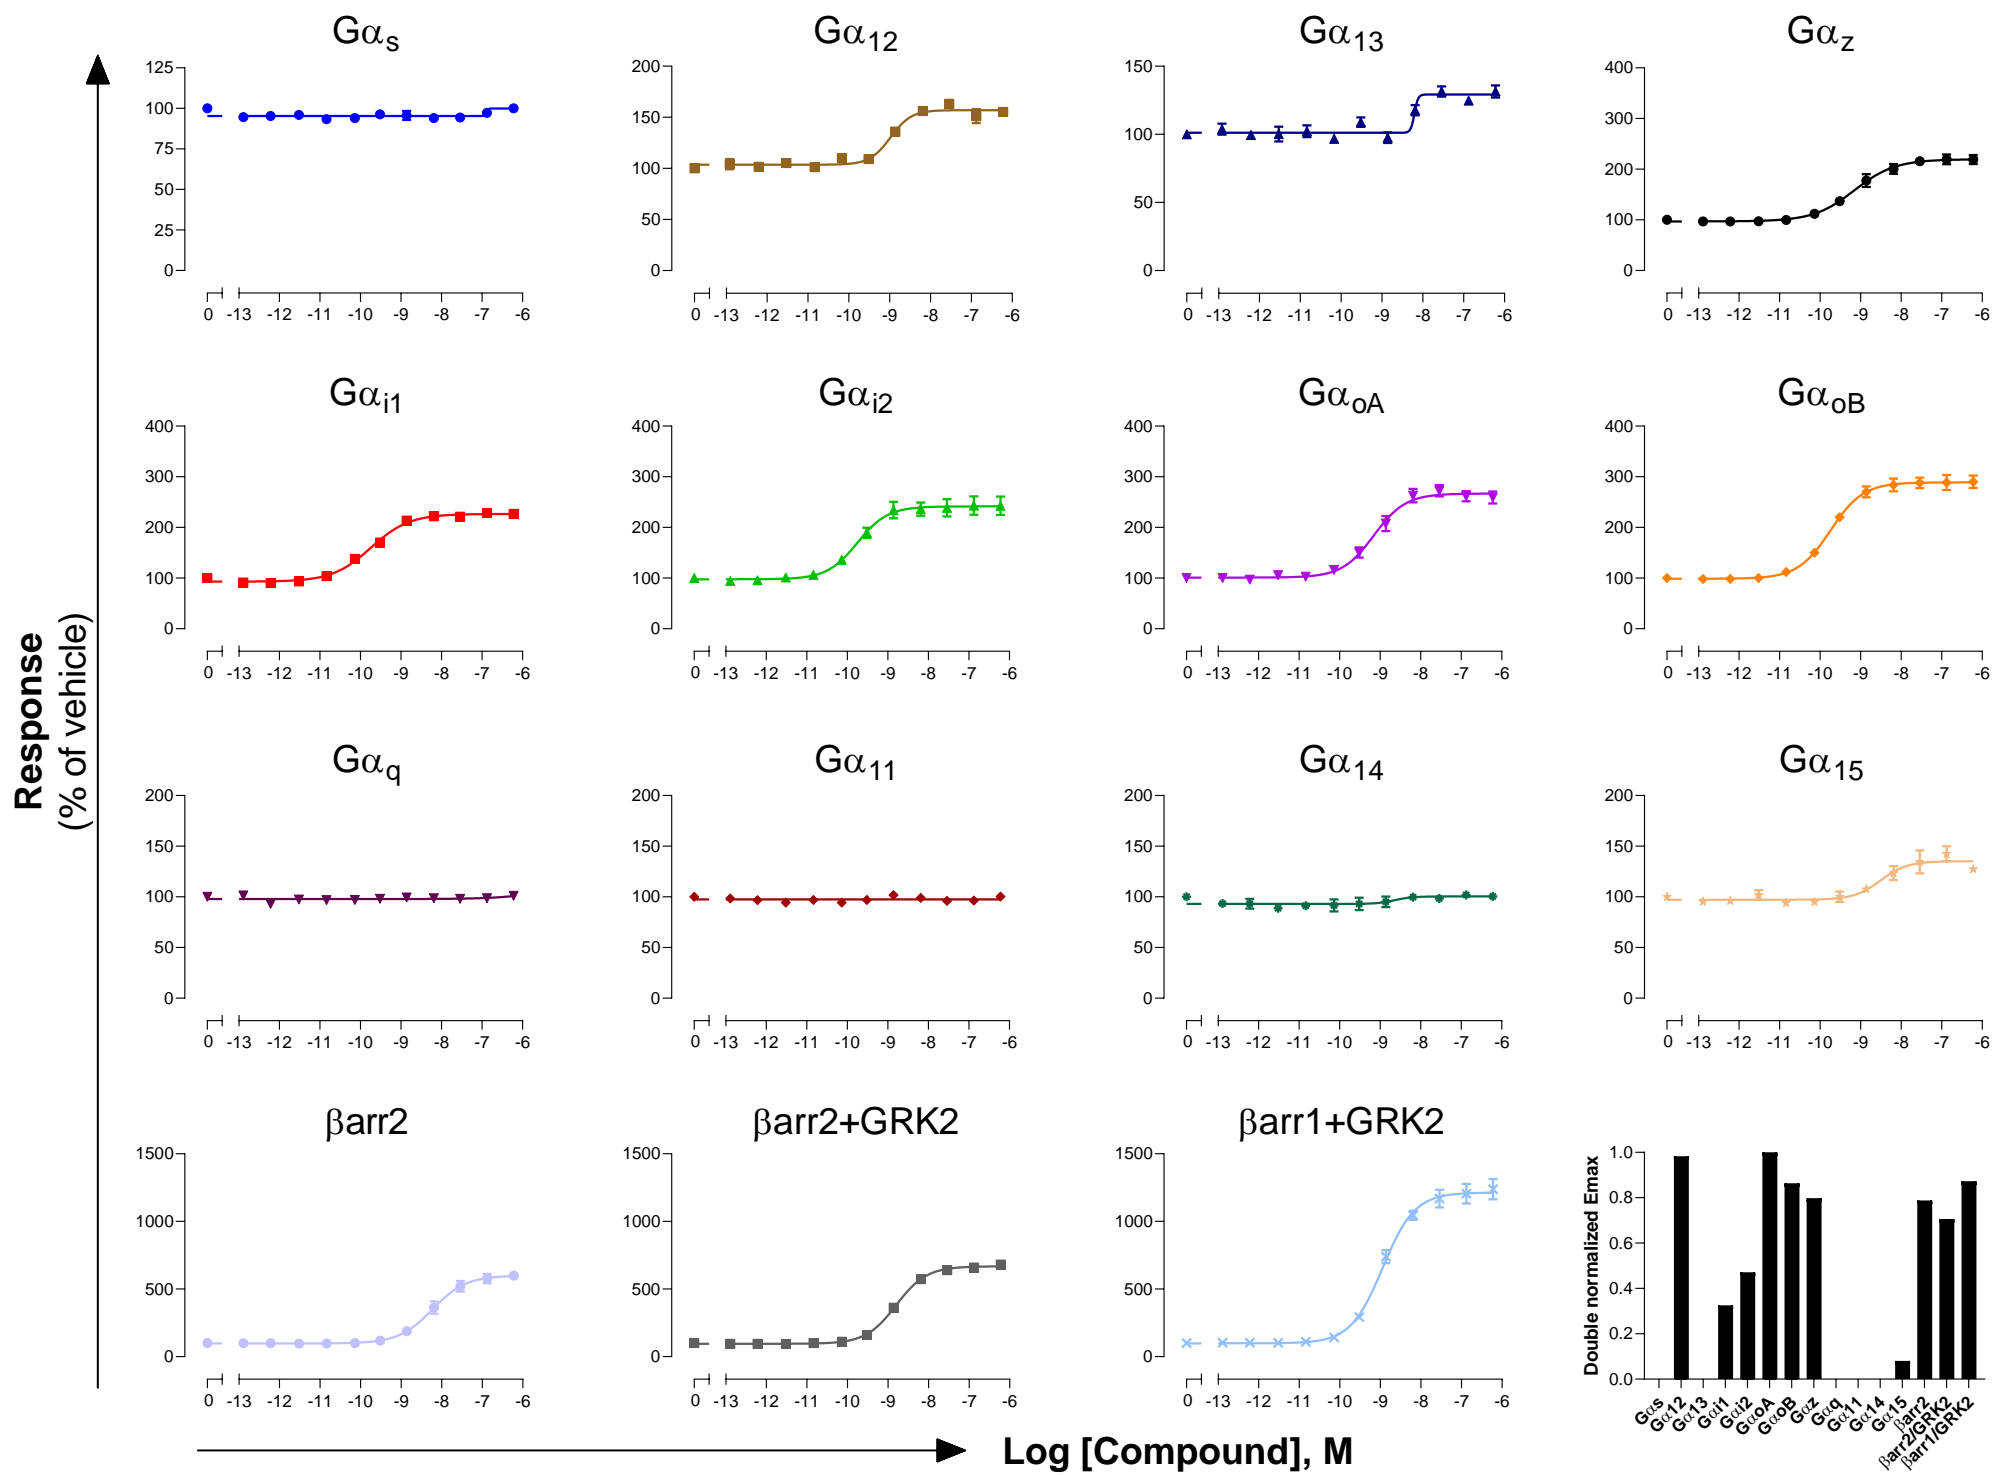

# GPCR: H<sub>1</sub>

Ligand: Histamine

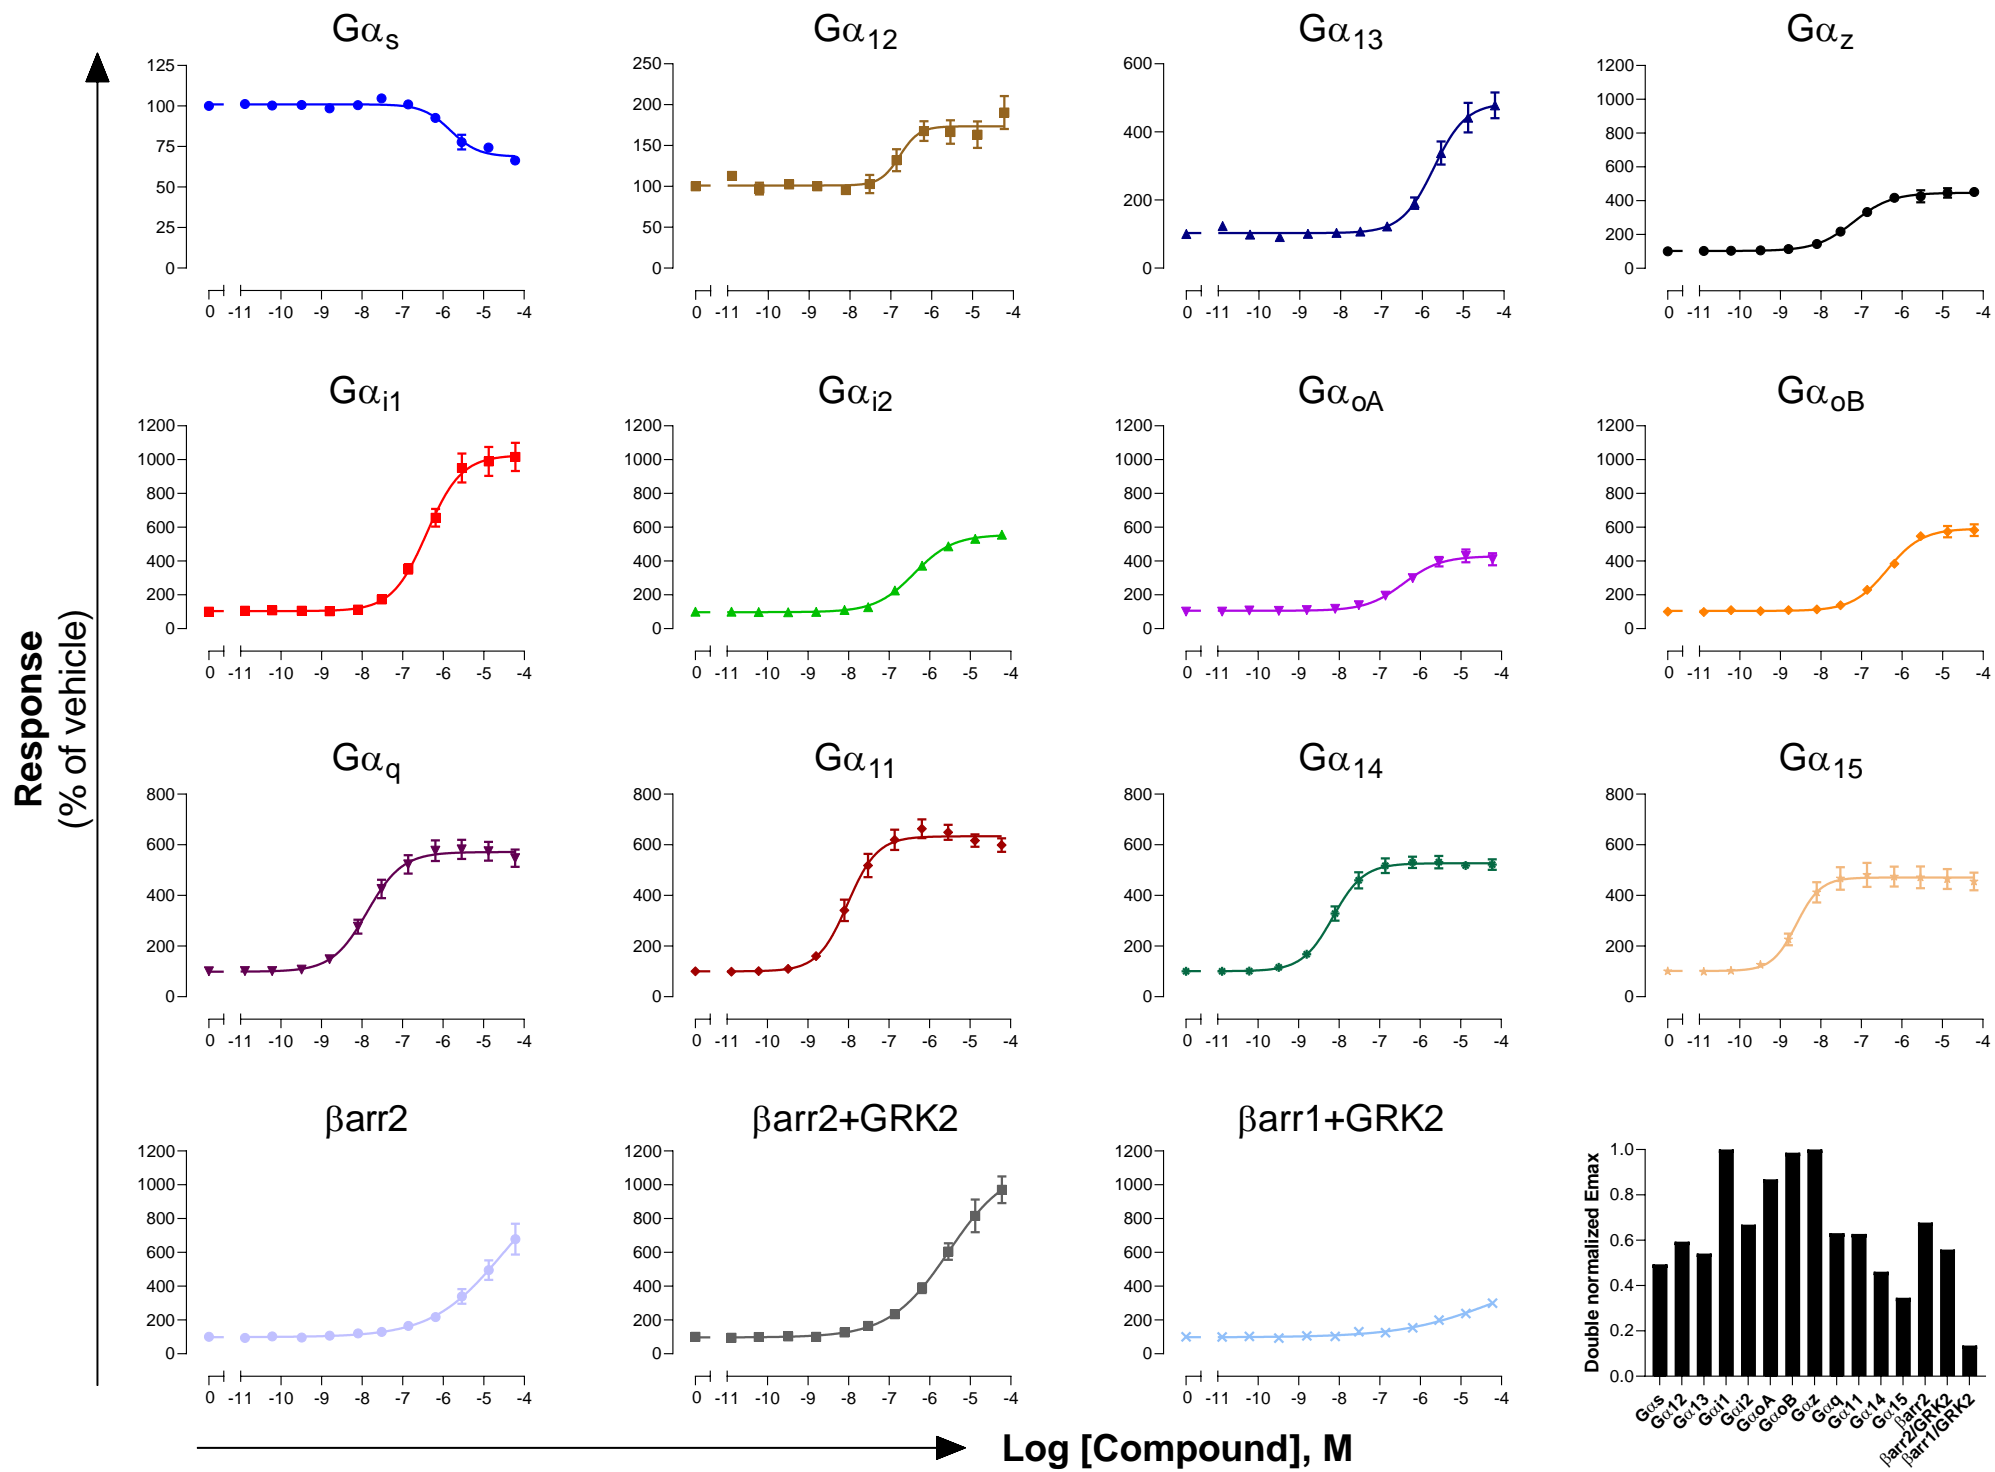



# GPCR: H<sub>2</sub>

Ligand: Histamine

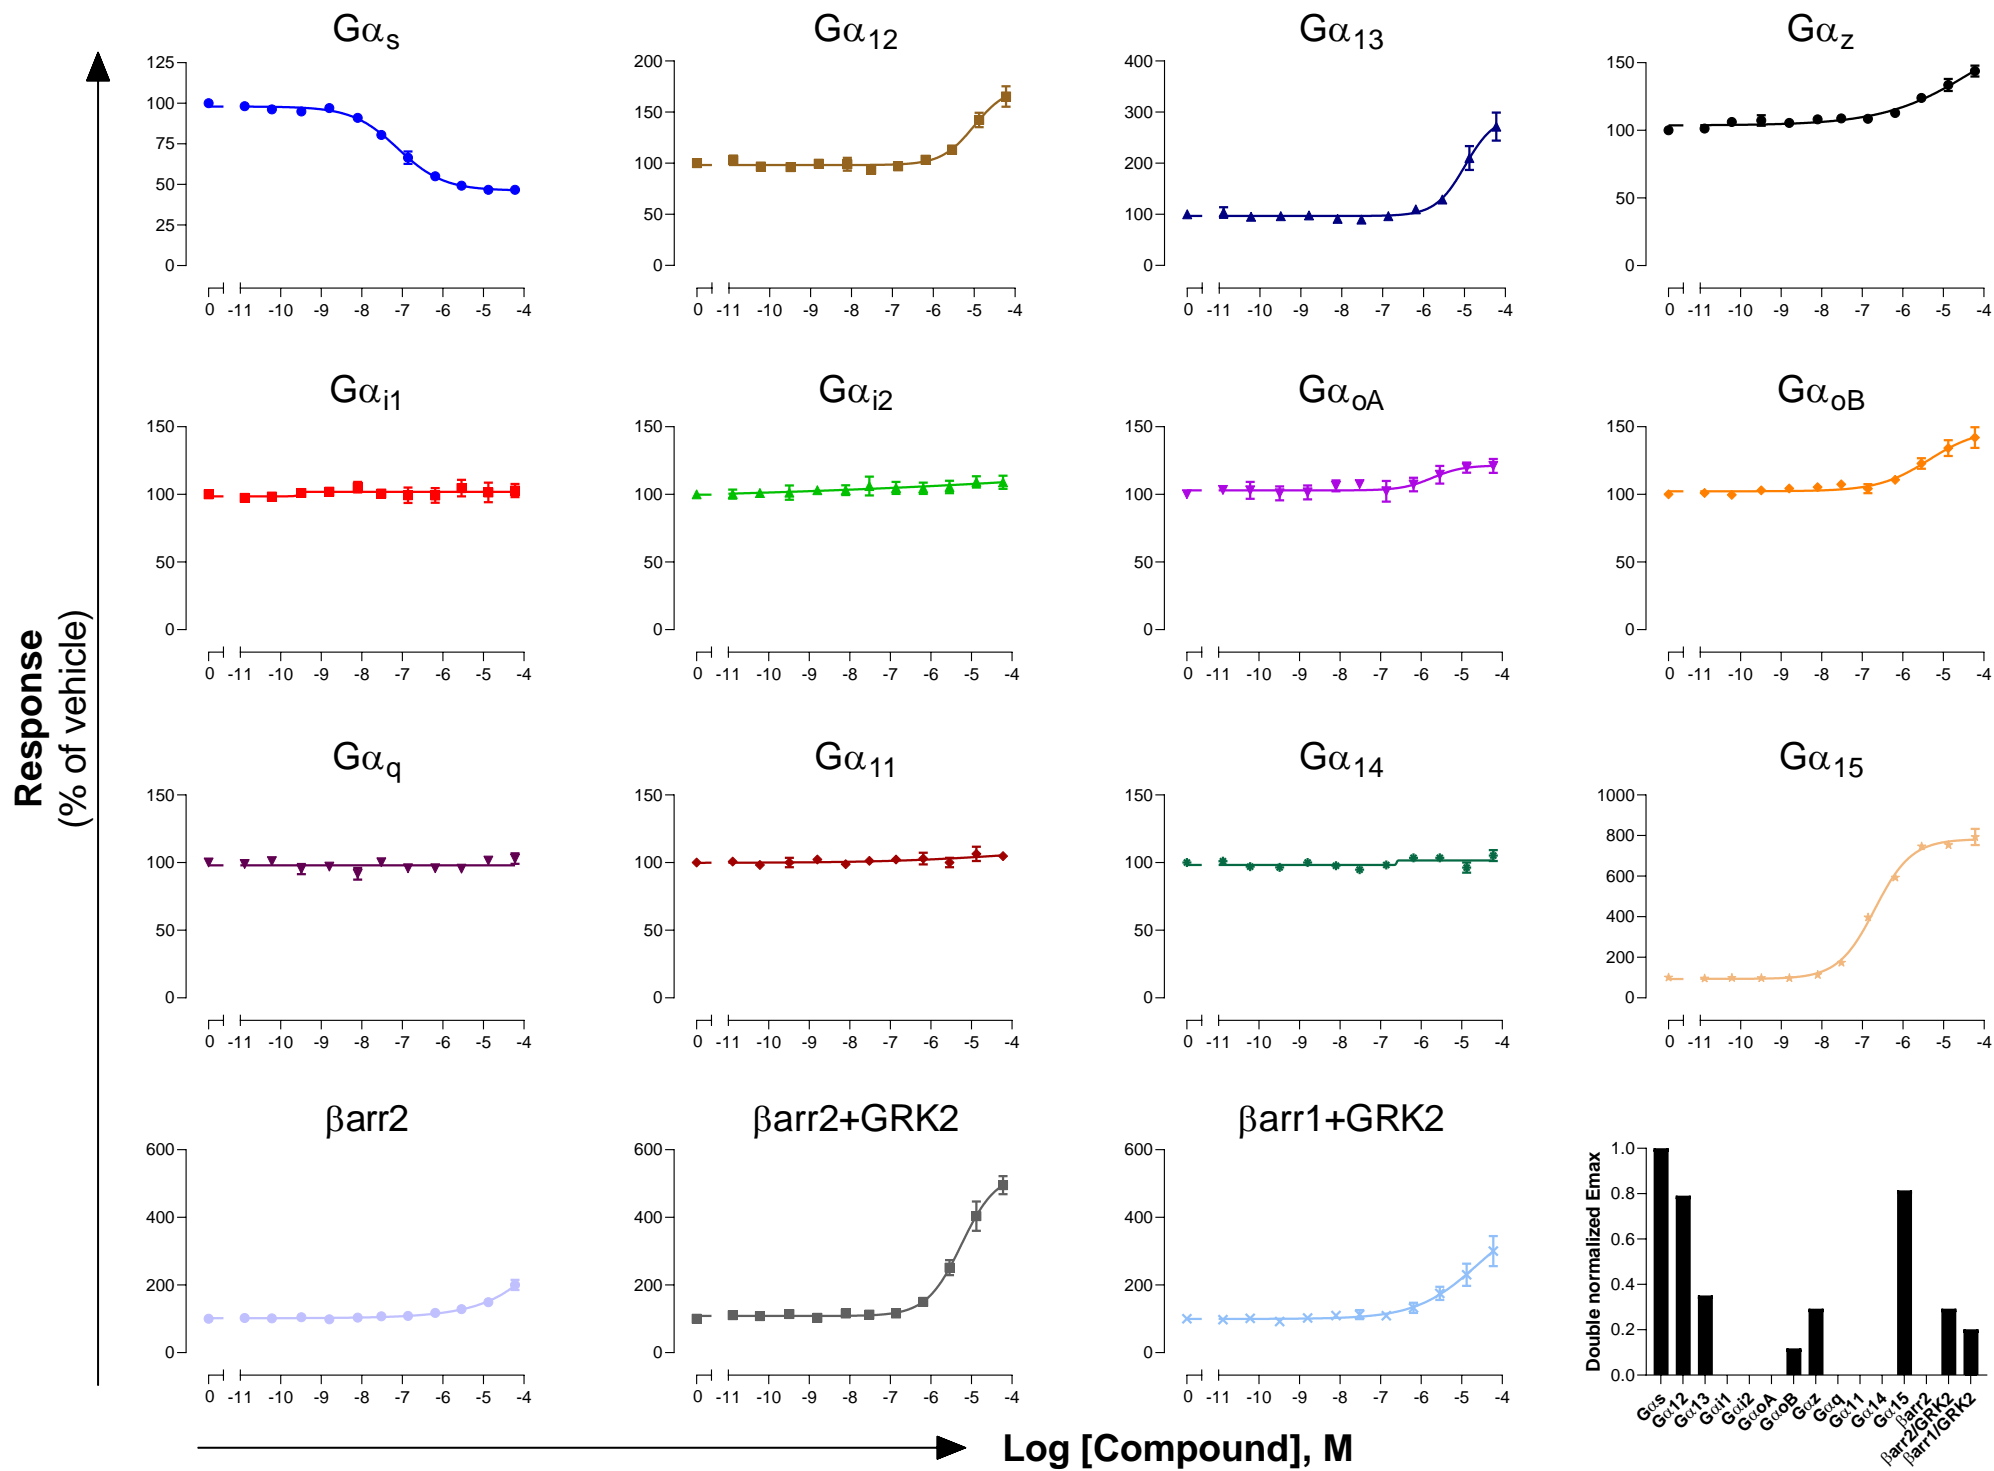

# GPCR: HCA<sub>2</sub>

Ligand: Nicotinic acid

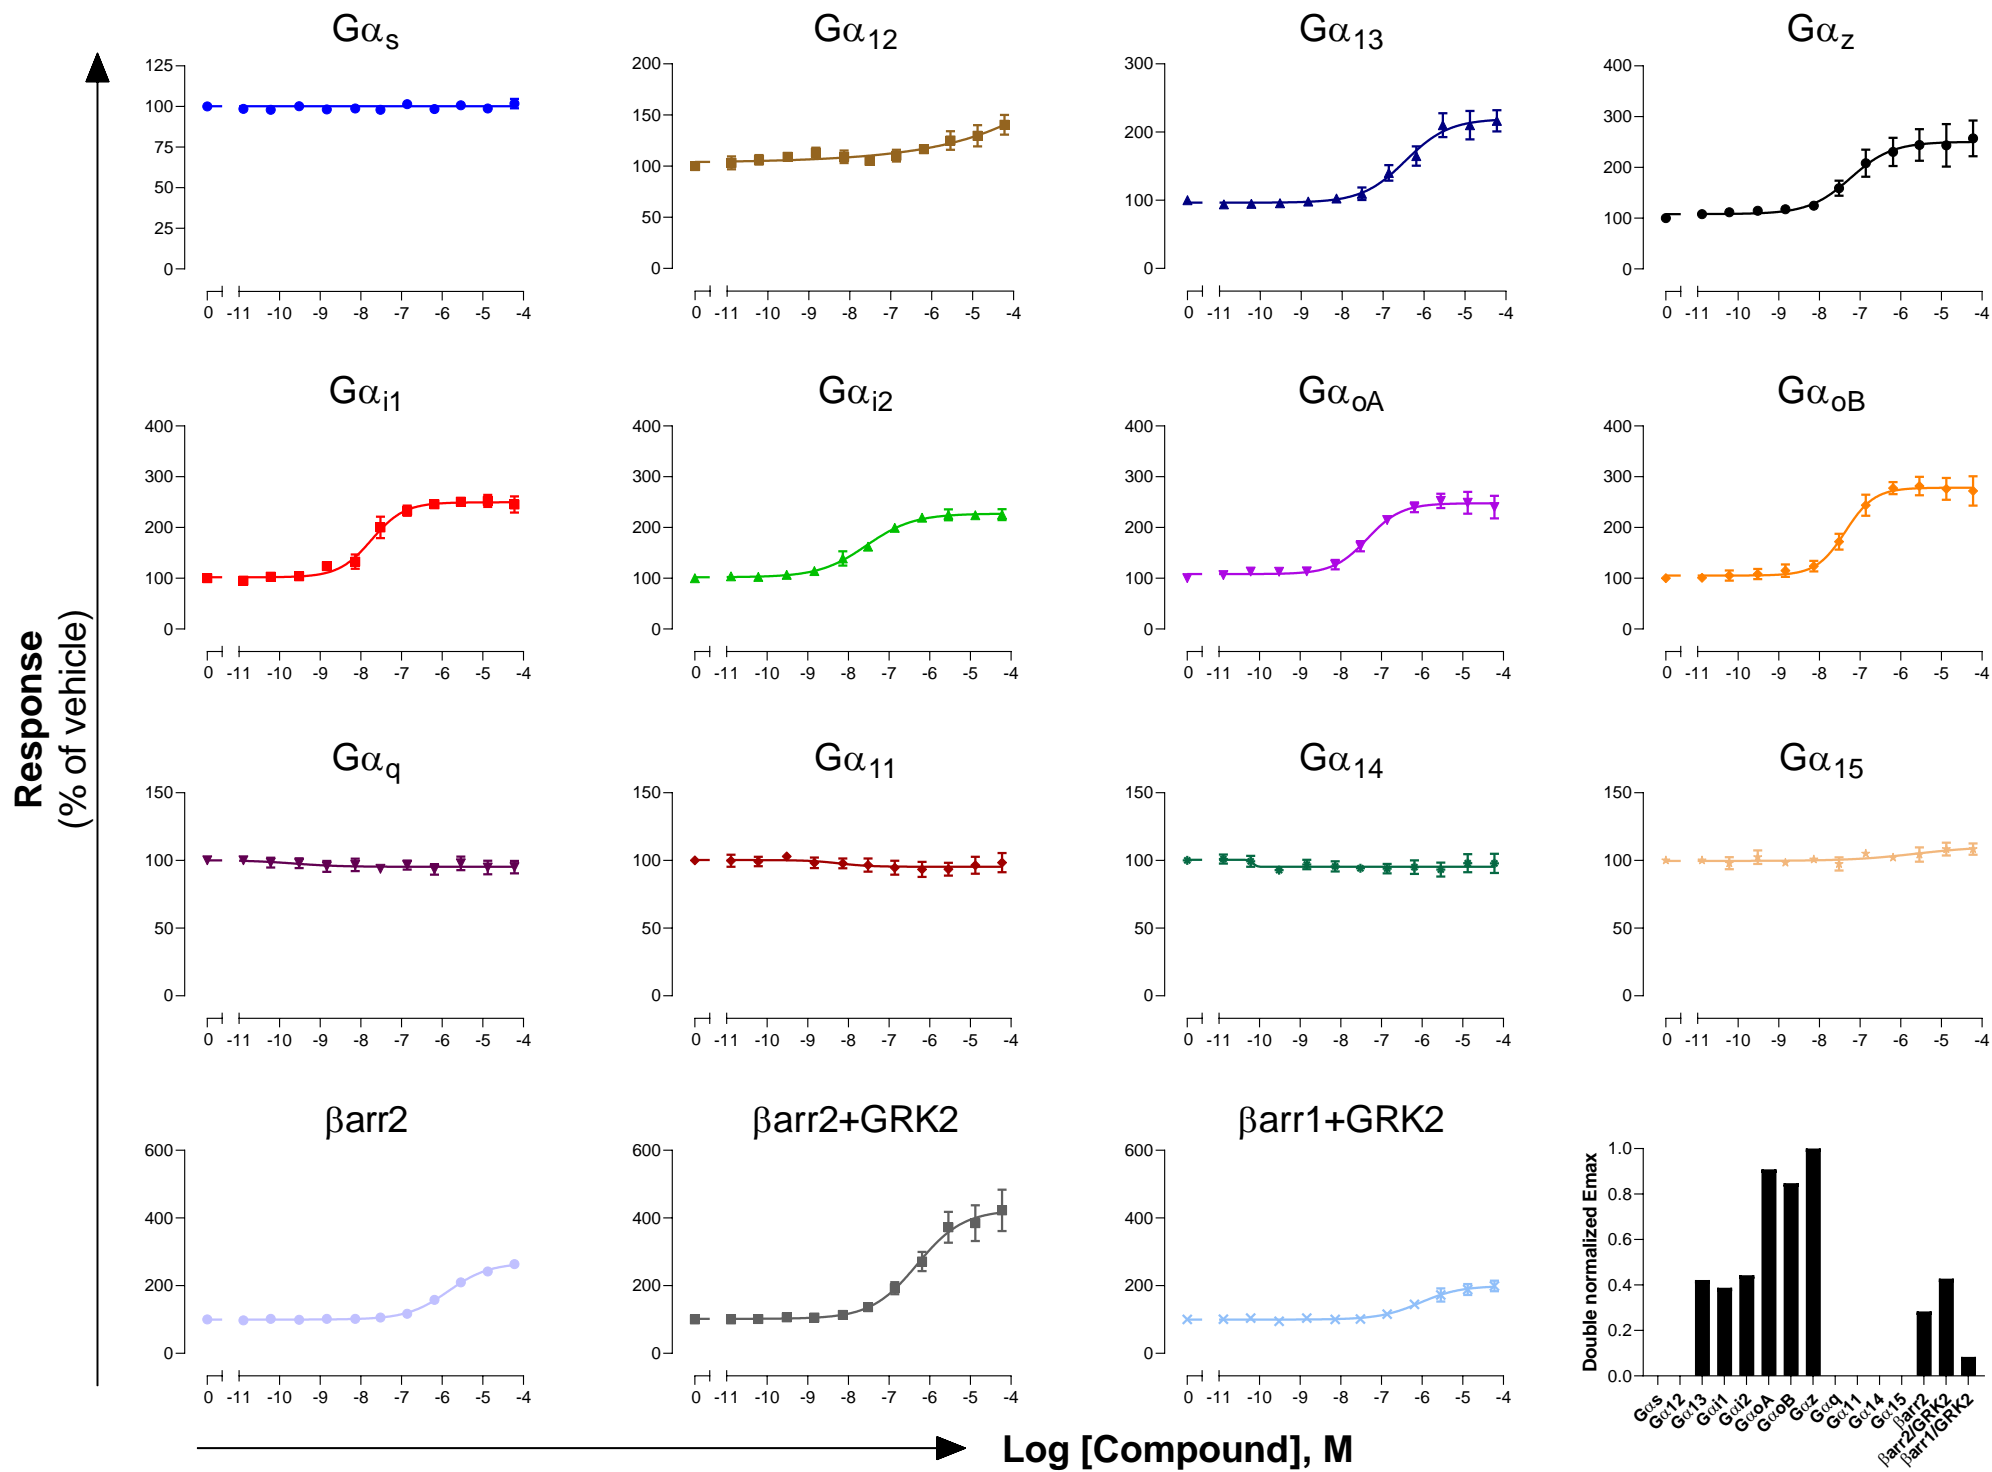

# GPCR: HCA<sub>3</sub>

## Ligand: 3-hydroxyoctanoic acid (3-HOA)

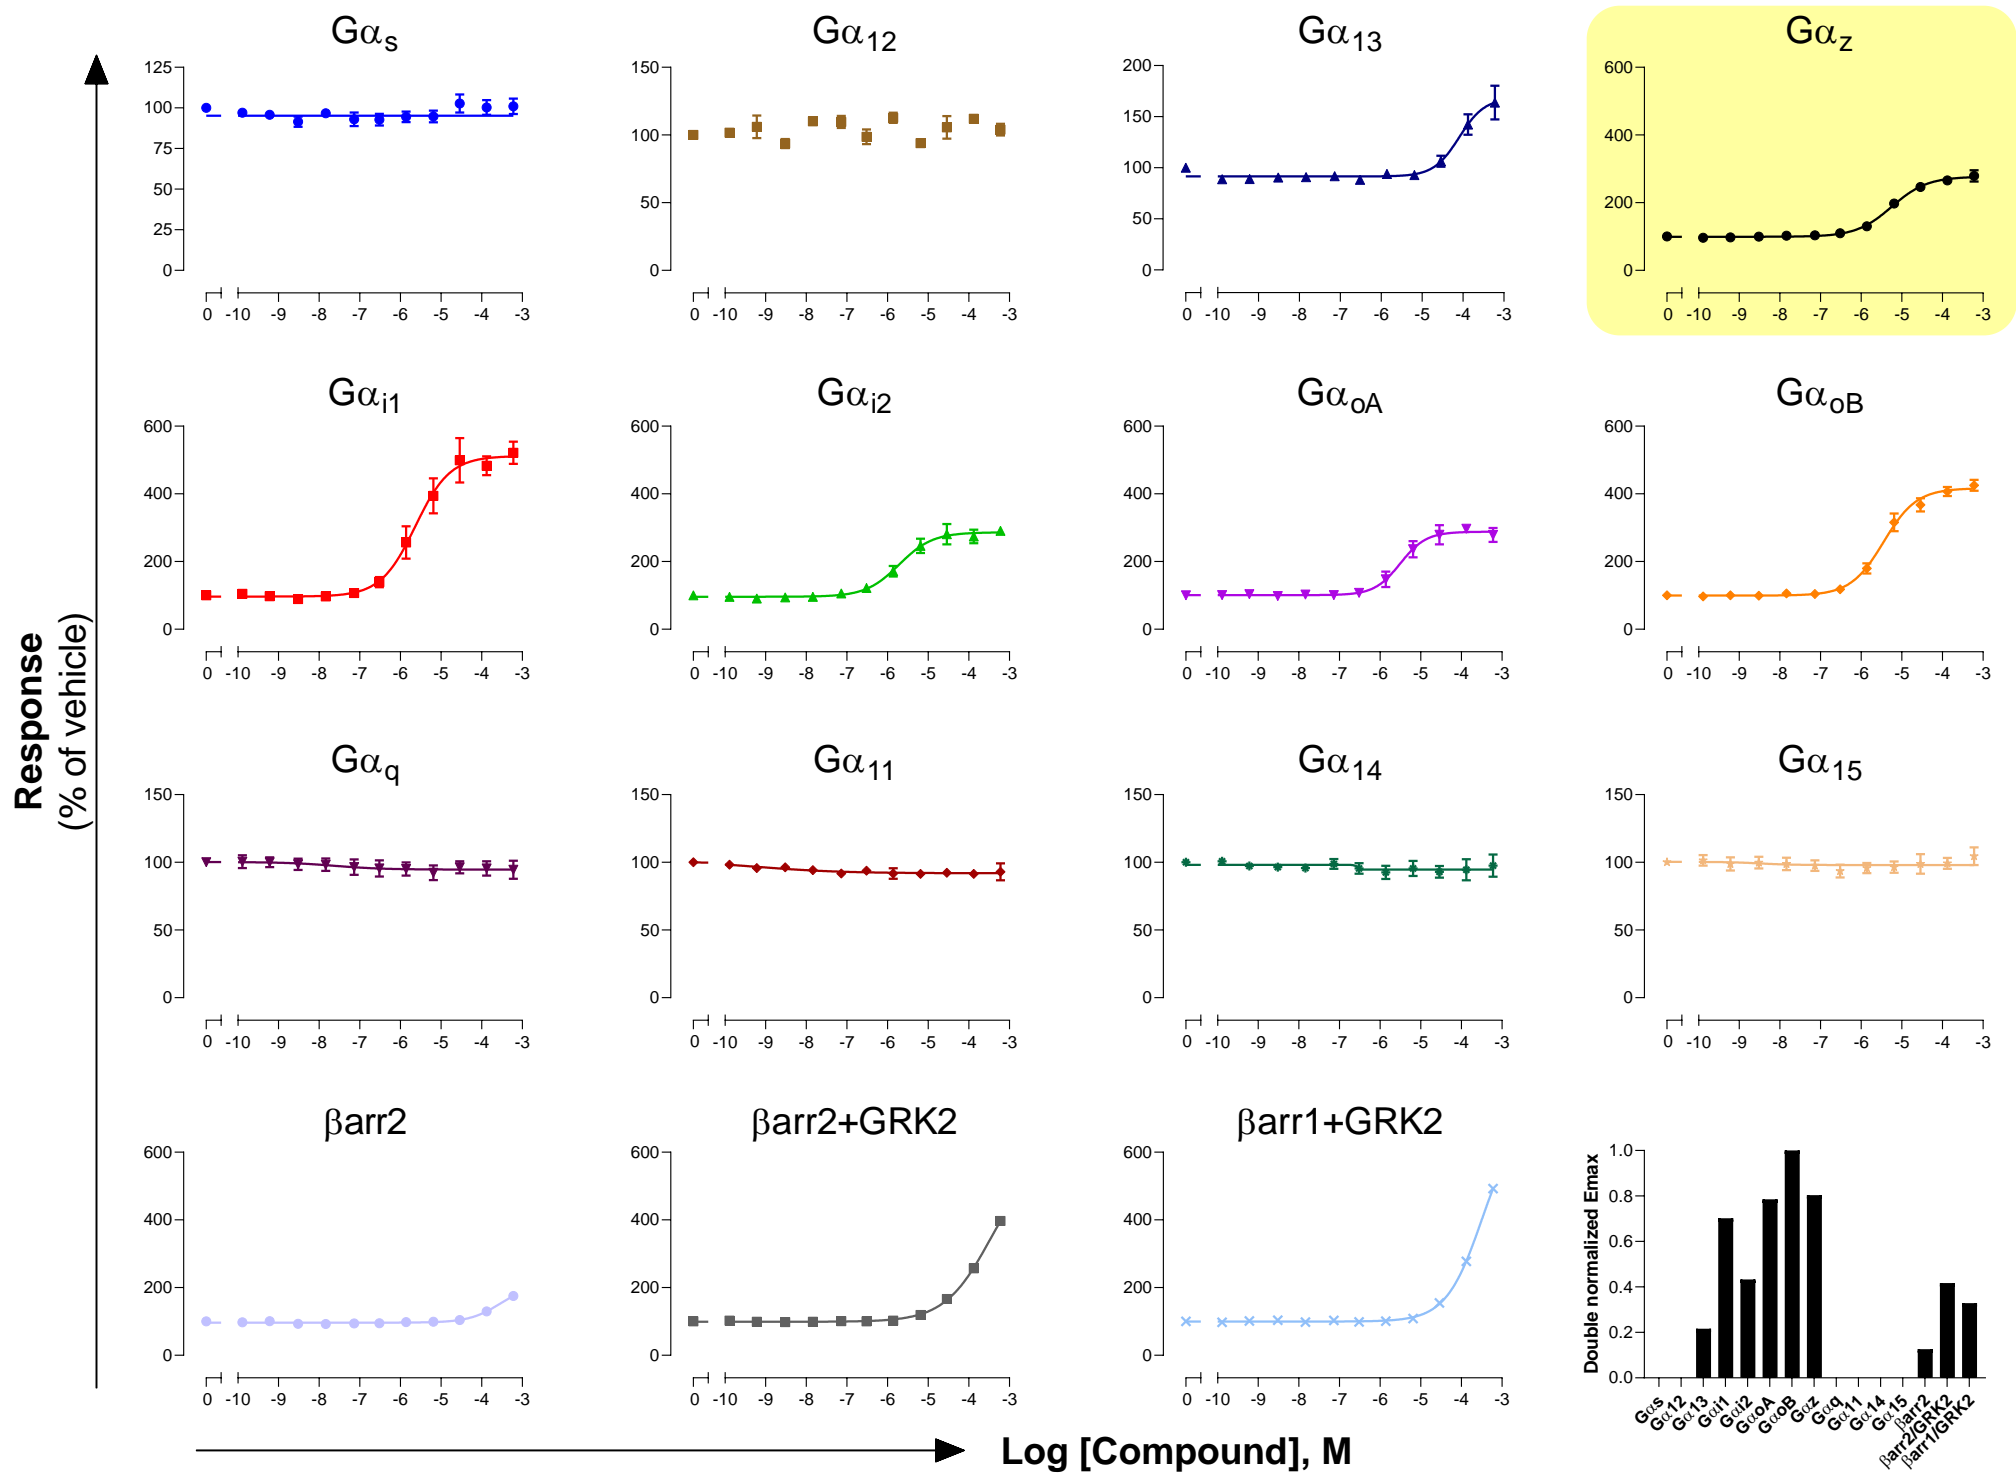

# GPCR: $\kappa$ OR

## Ligand: Dynorphin A

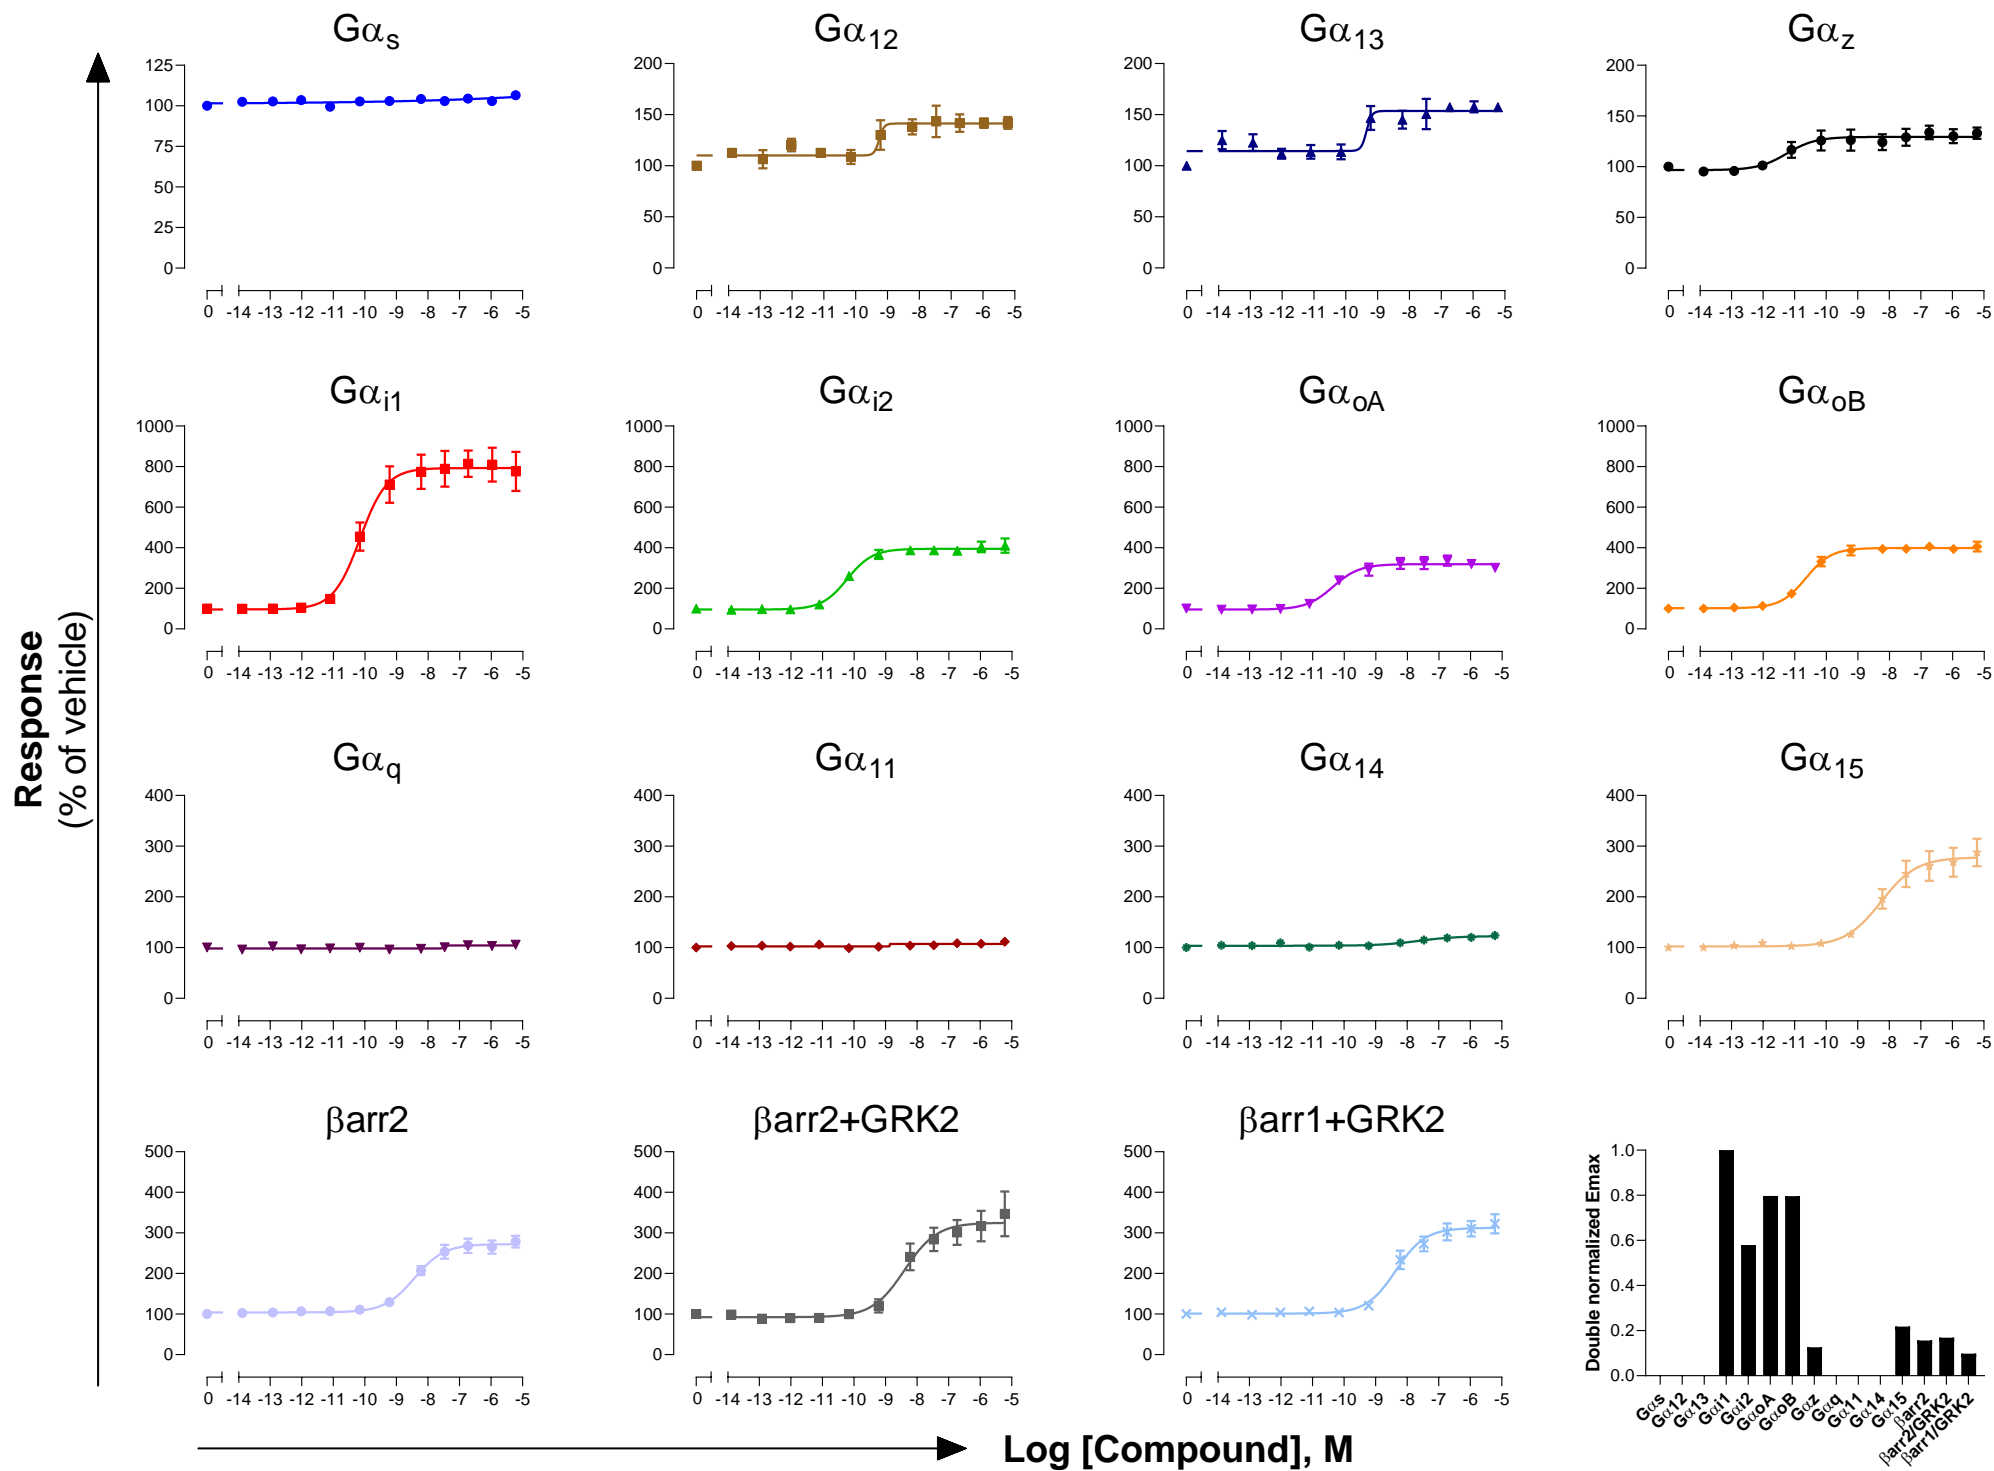

# GPCR: LPA<sub>1</sub>

Ligand: oleoyl-LPA

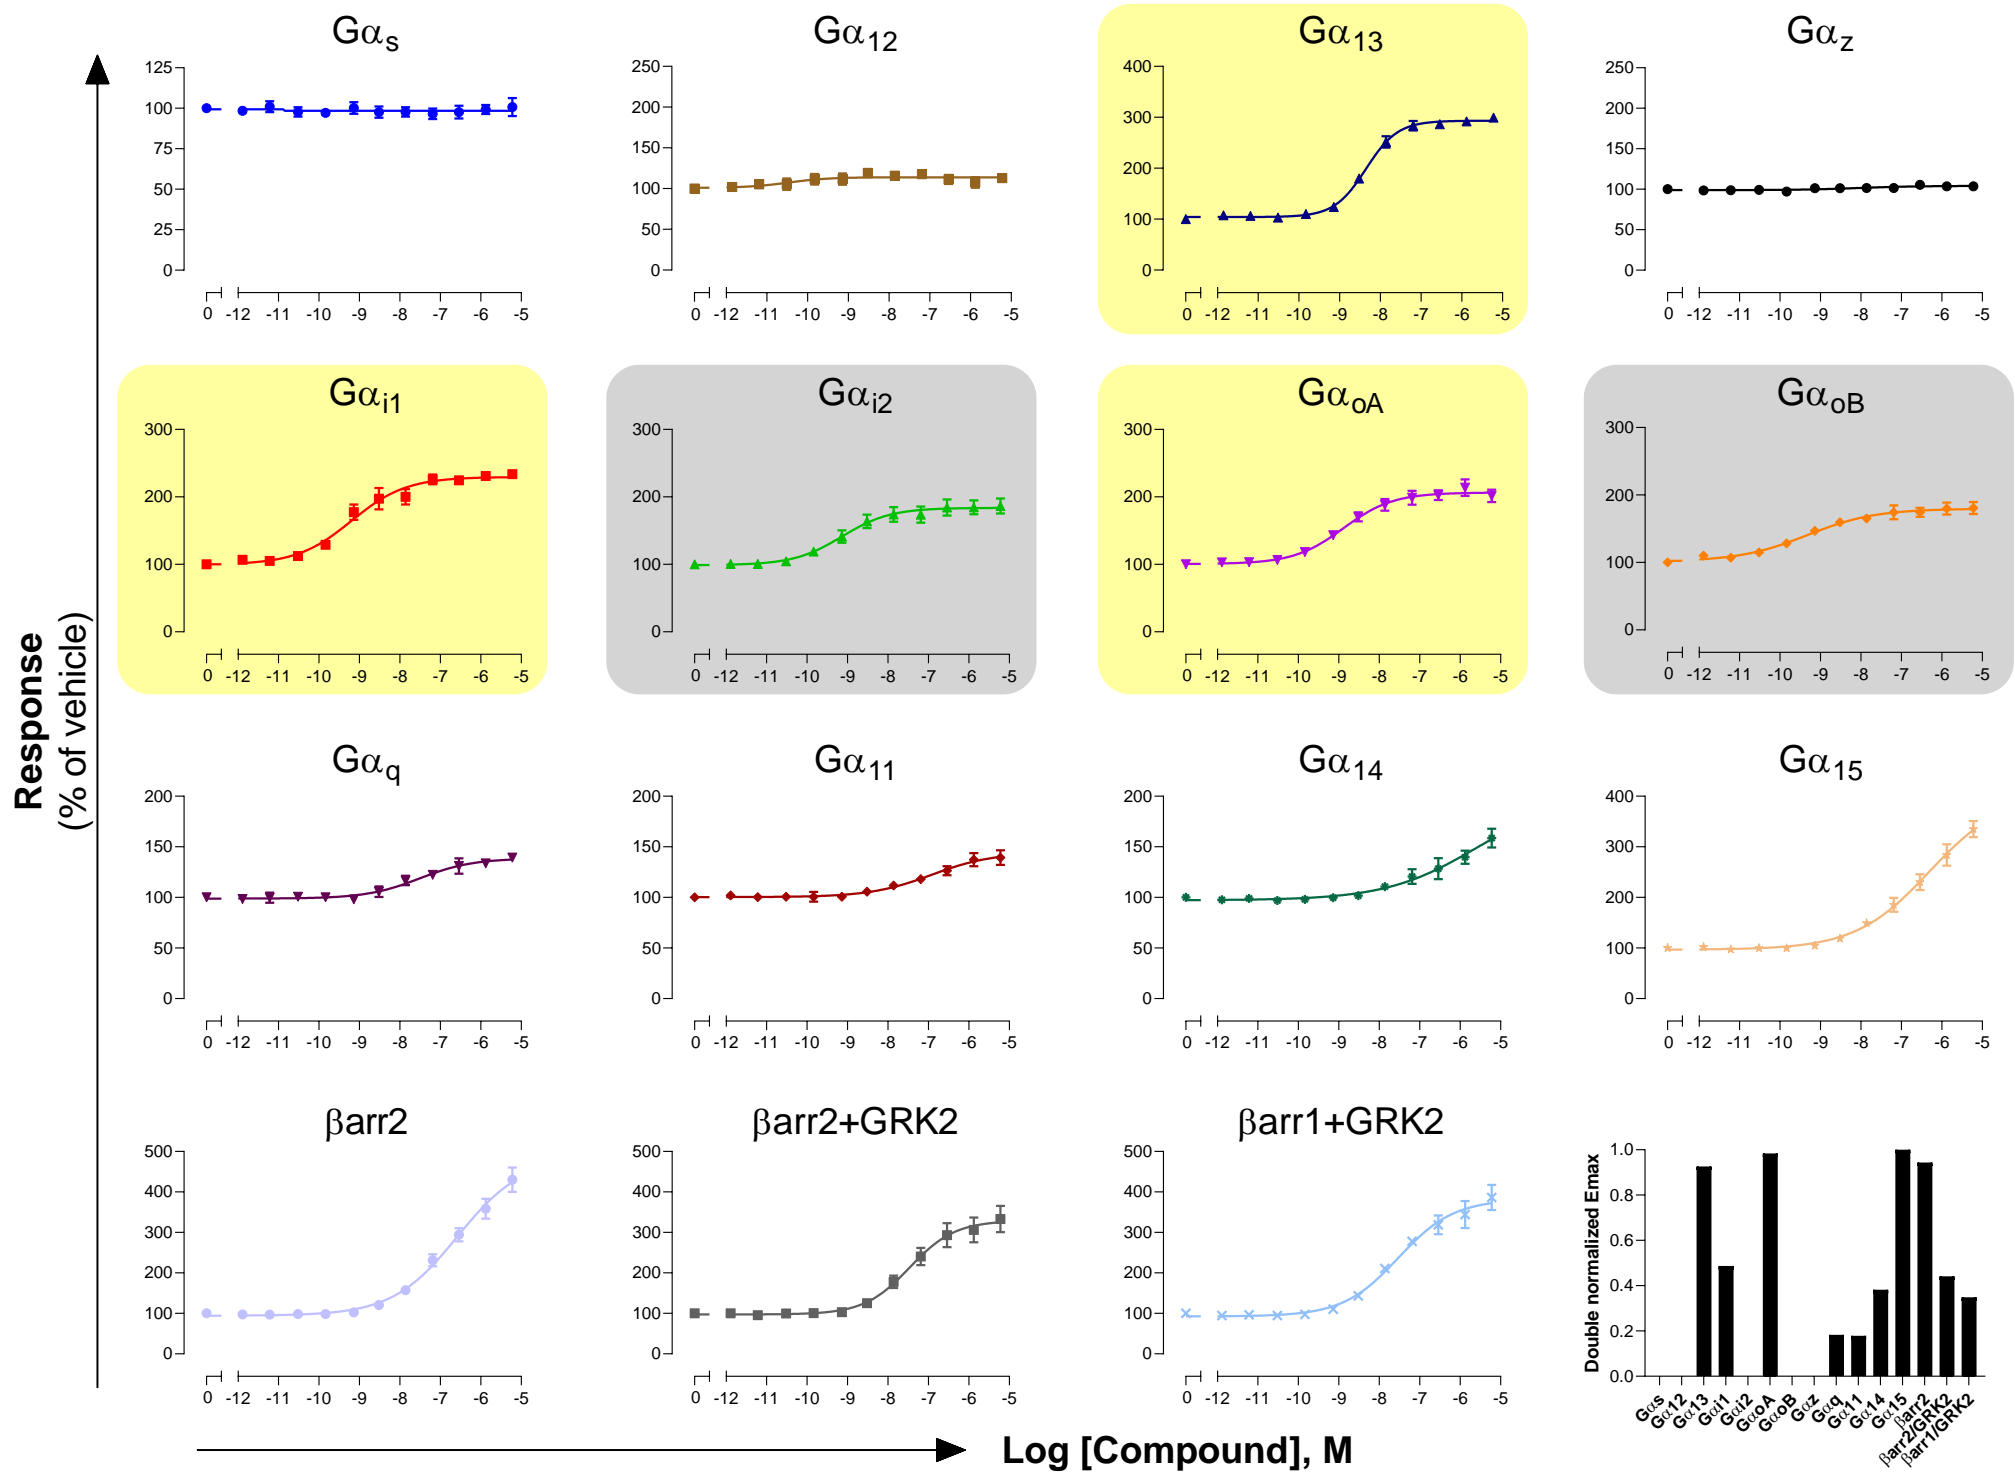

# GPCR: LPA<sub>2</sub>

Ligand: oleoyl-LPA

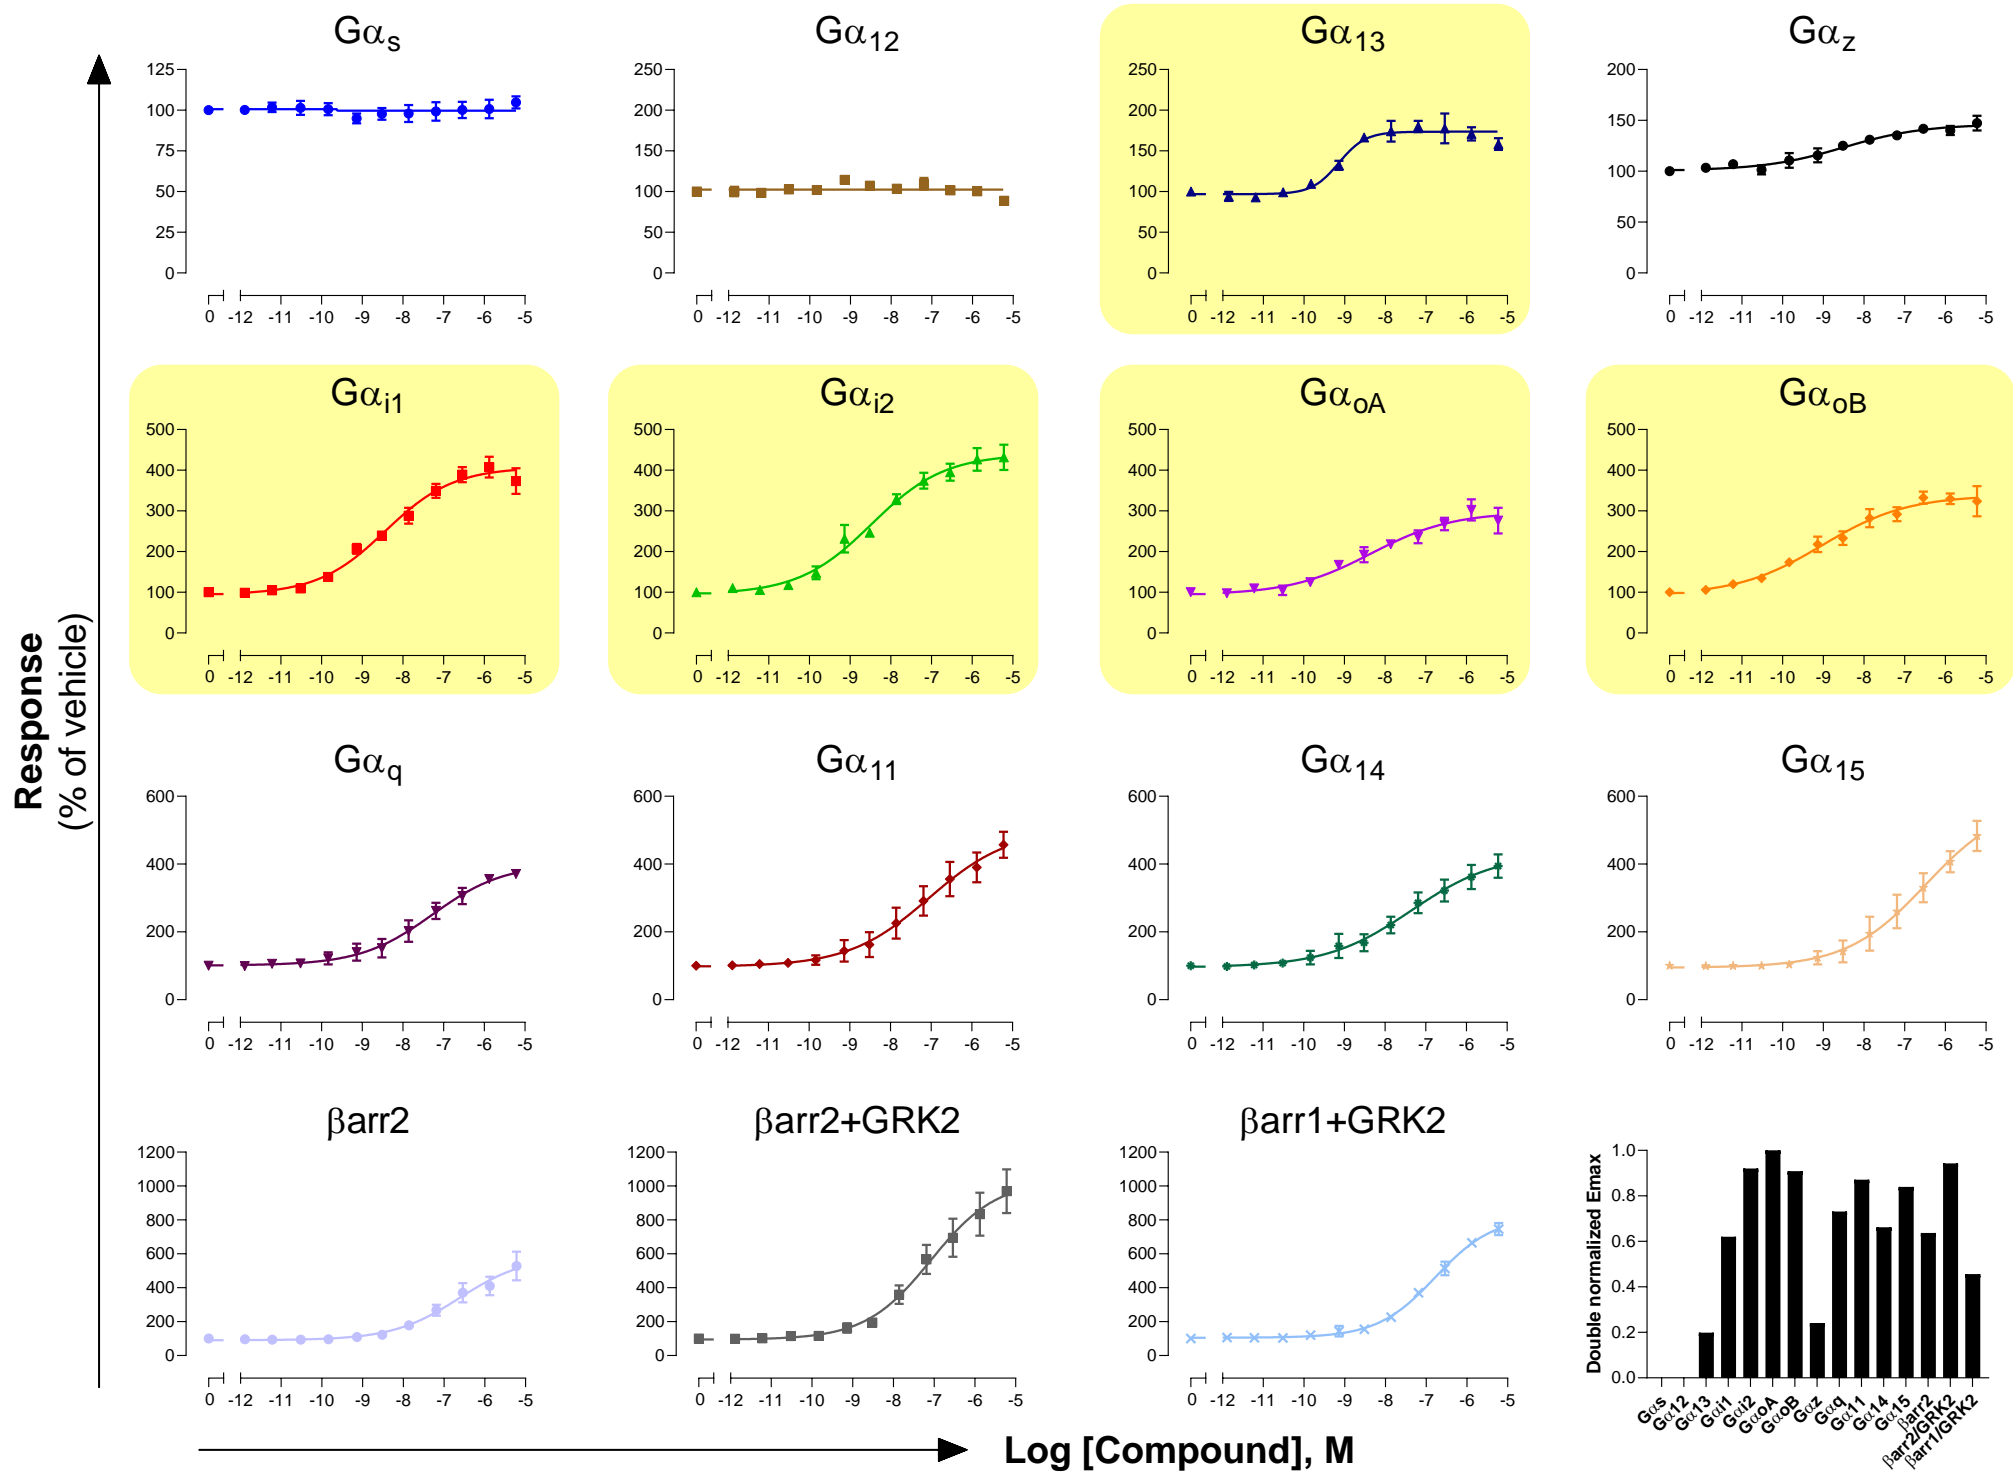

# GPCR: M<sub>1</sub>

Ligand: Acetylcholine

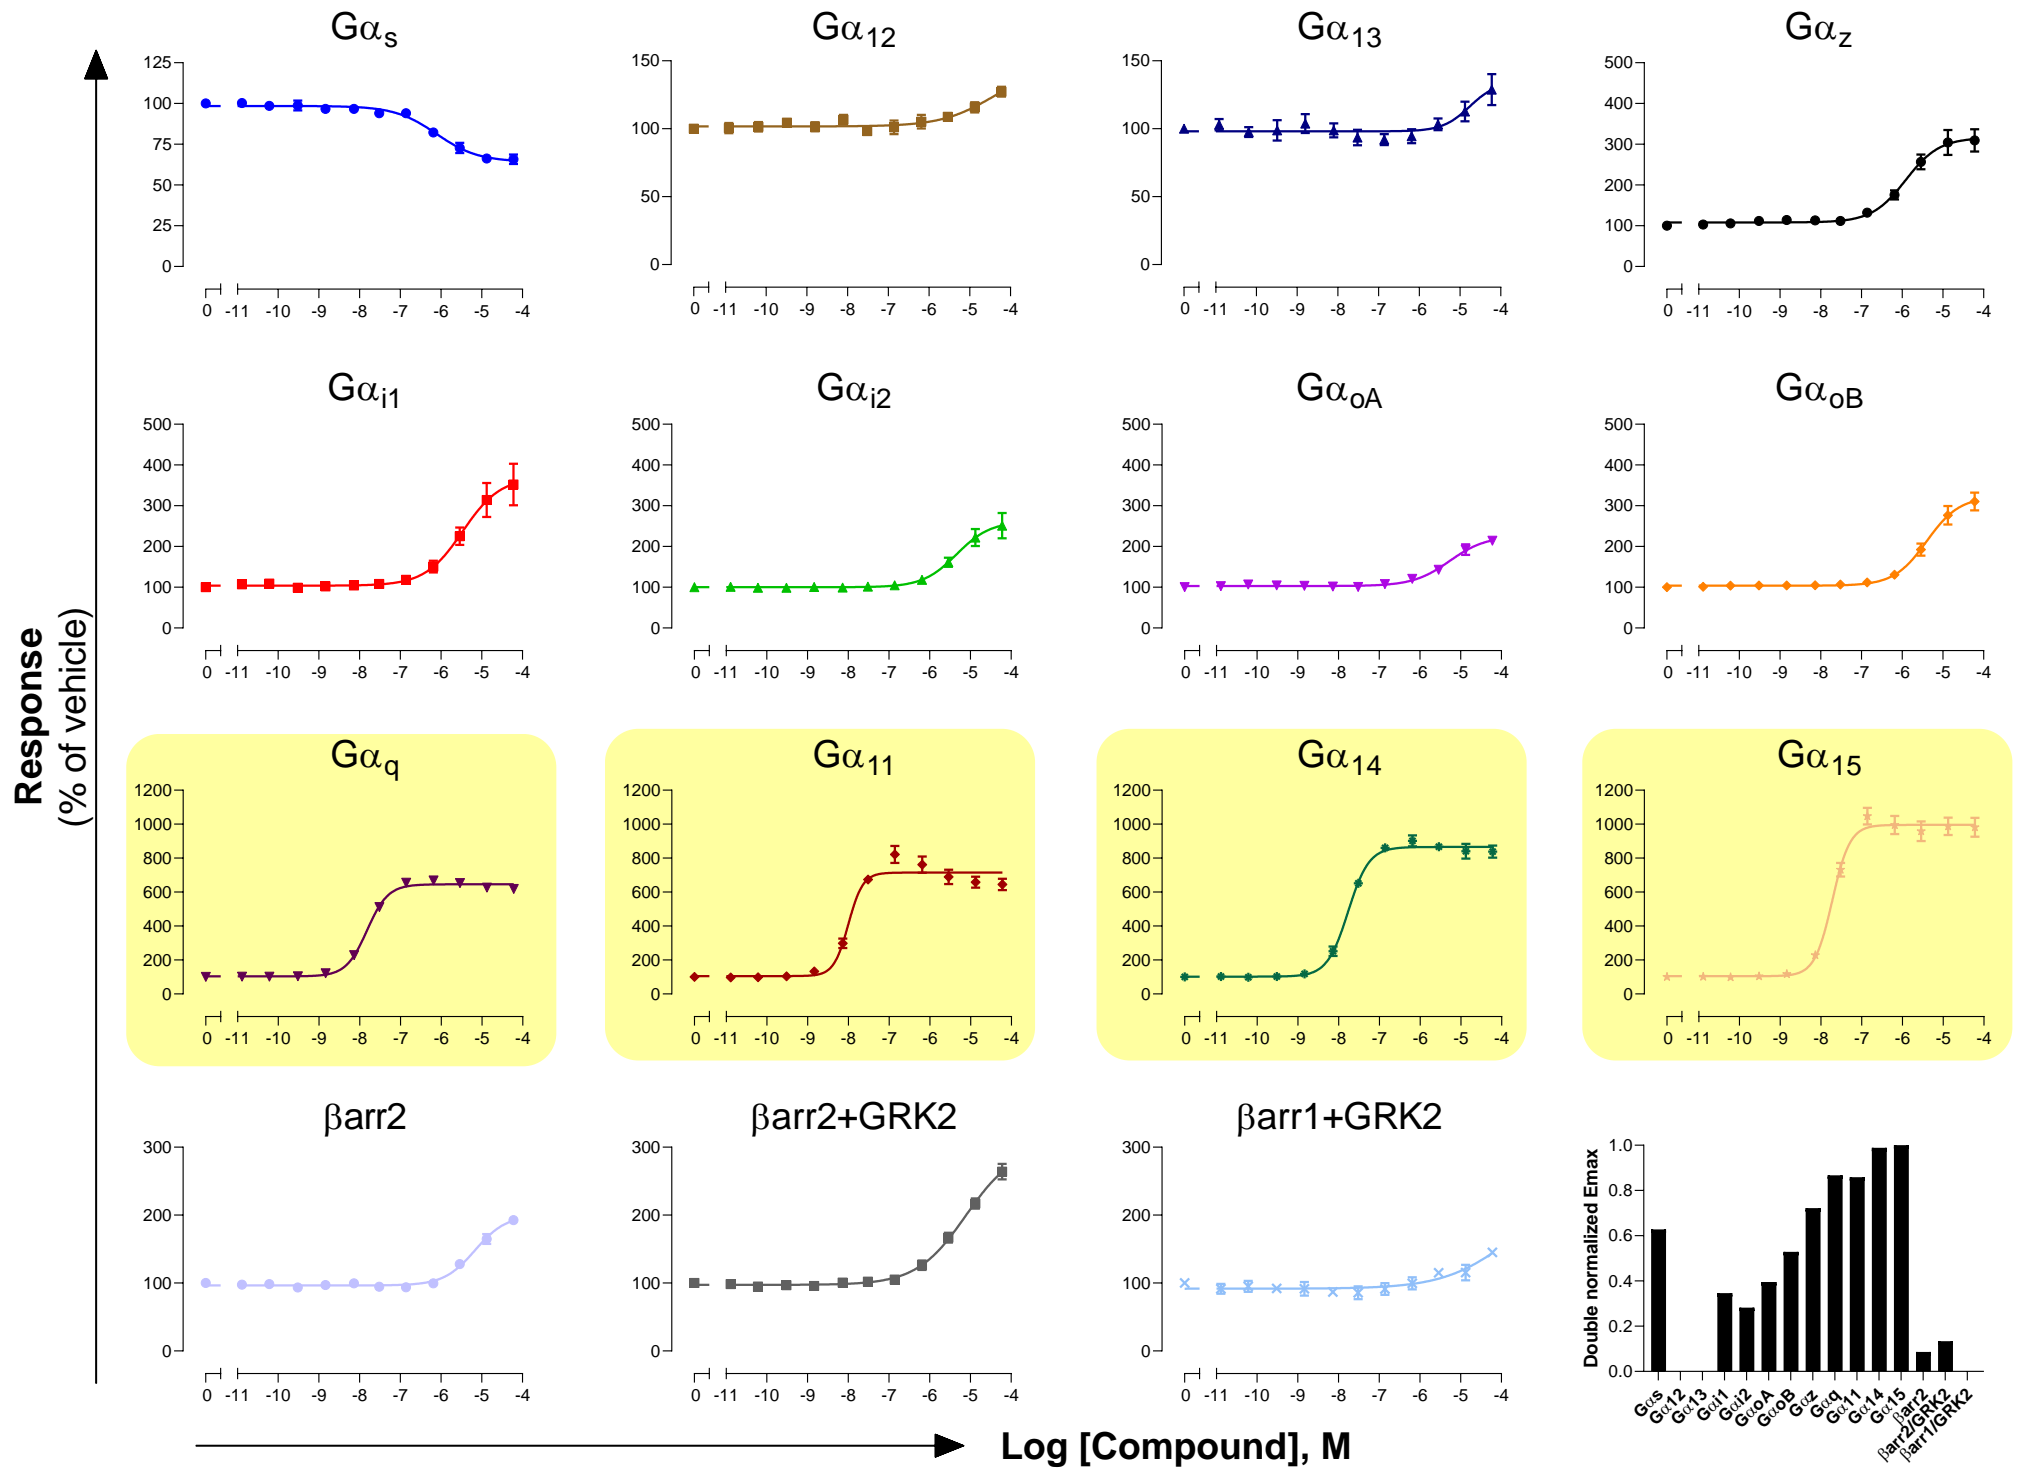

# GPCR: M<sub>2</sub>

Ligand: Acetylcholine

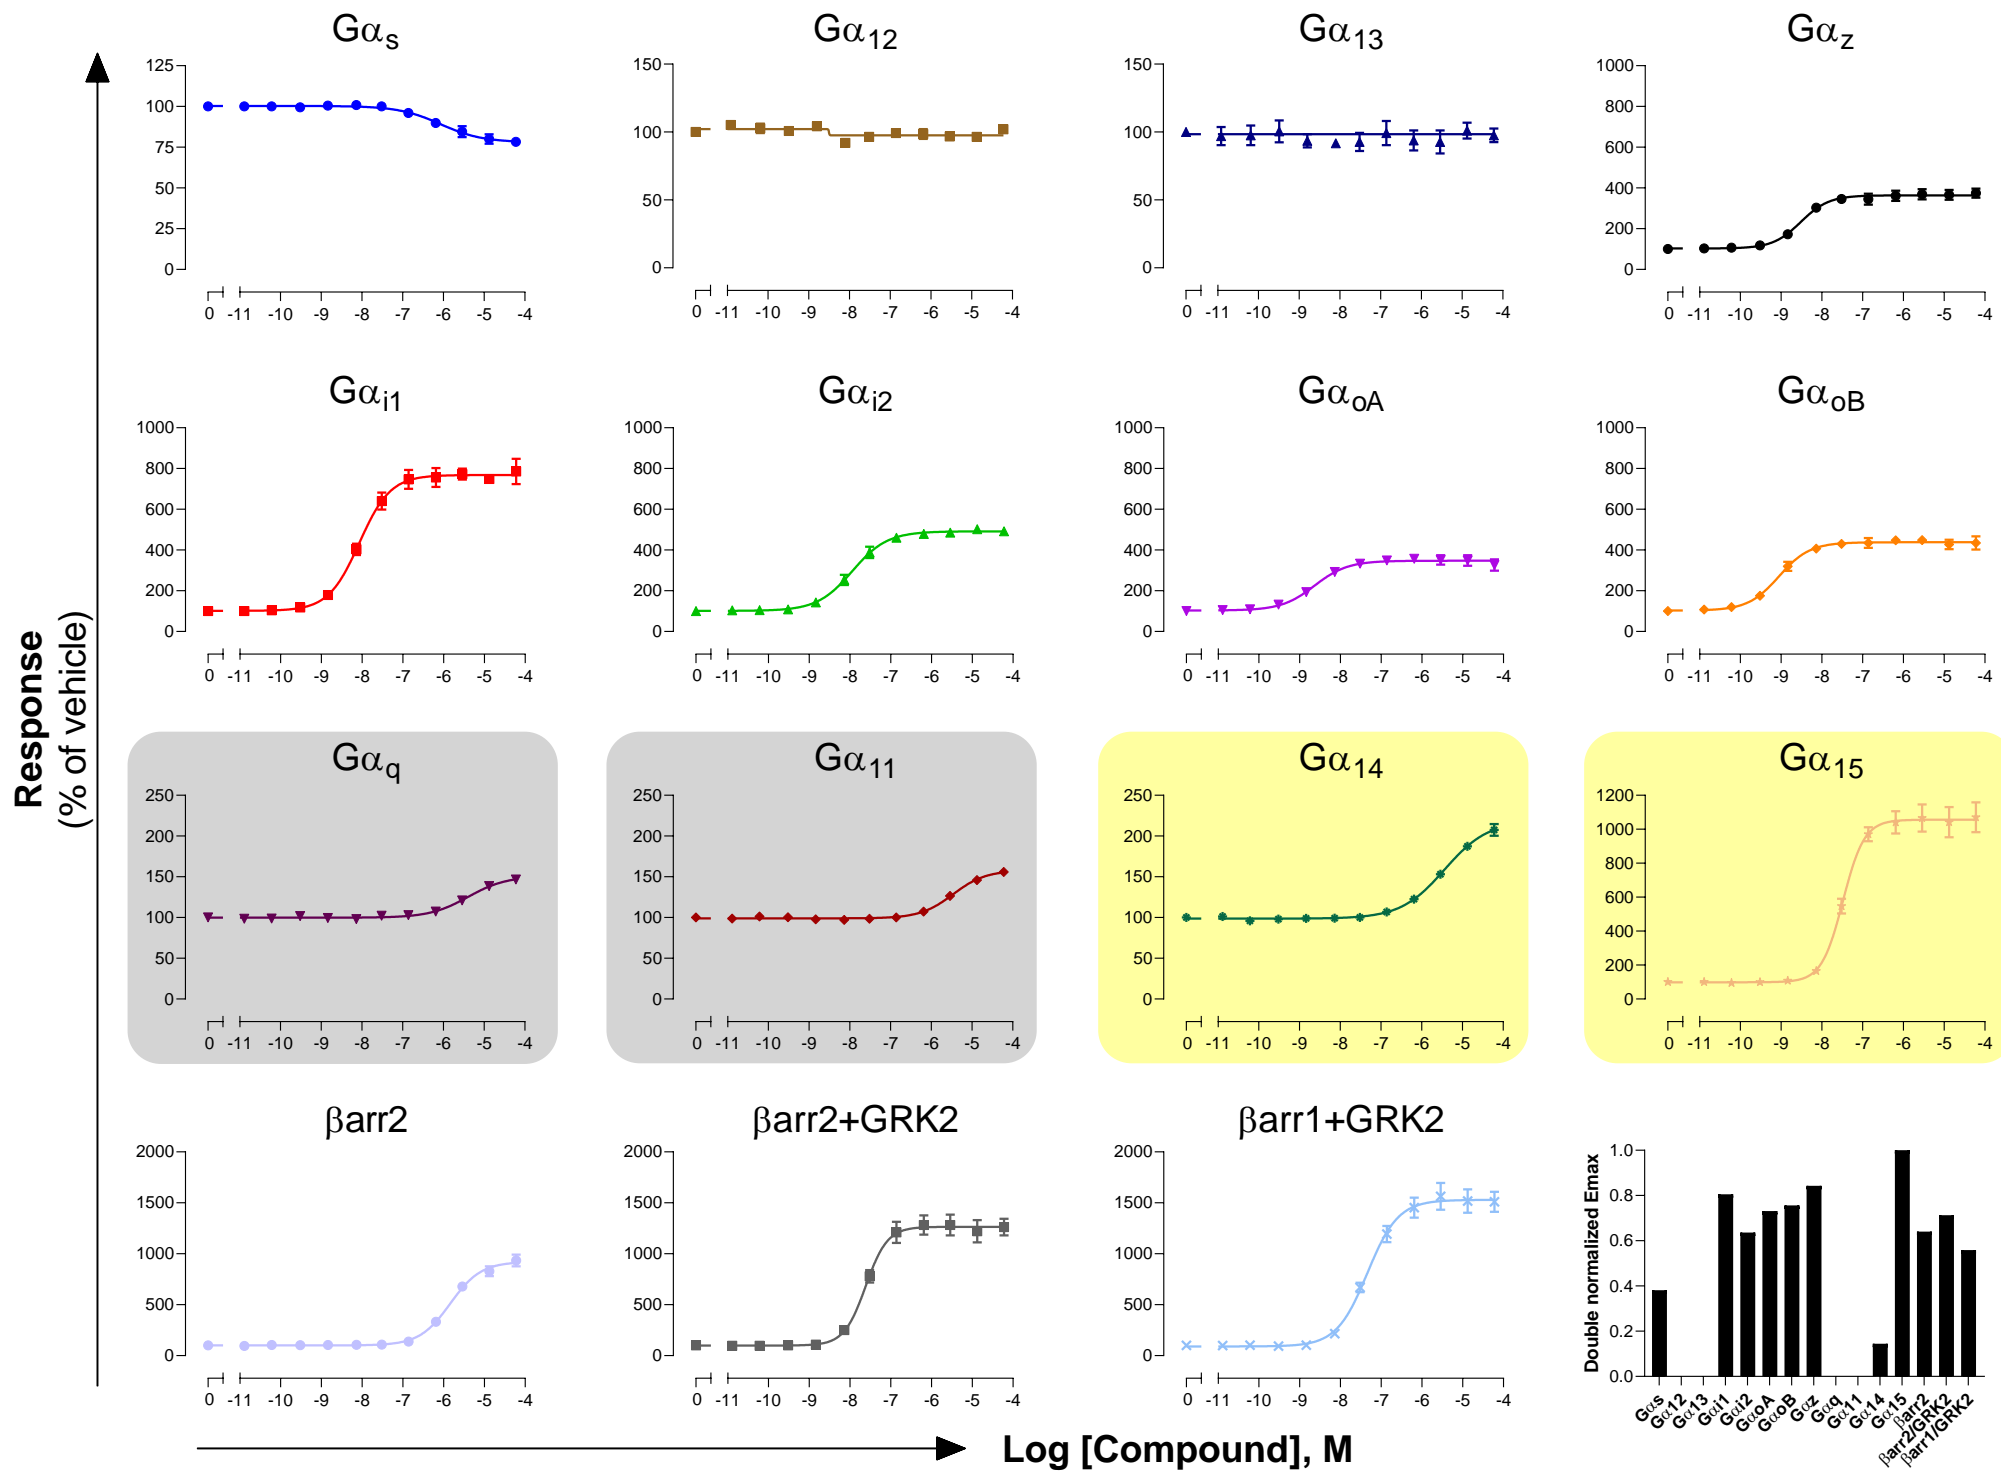



# GPCR: M<sub>3</sub>

Ligand: Acetylcholine

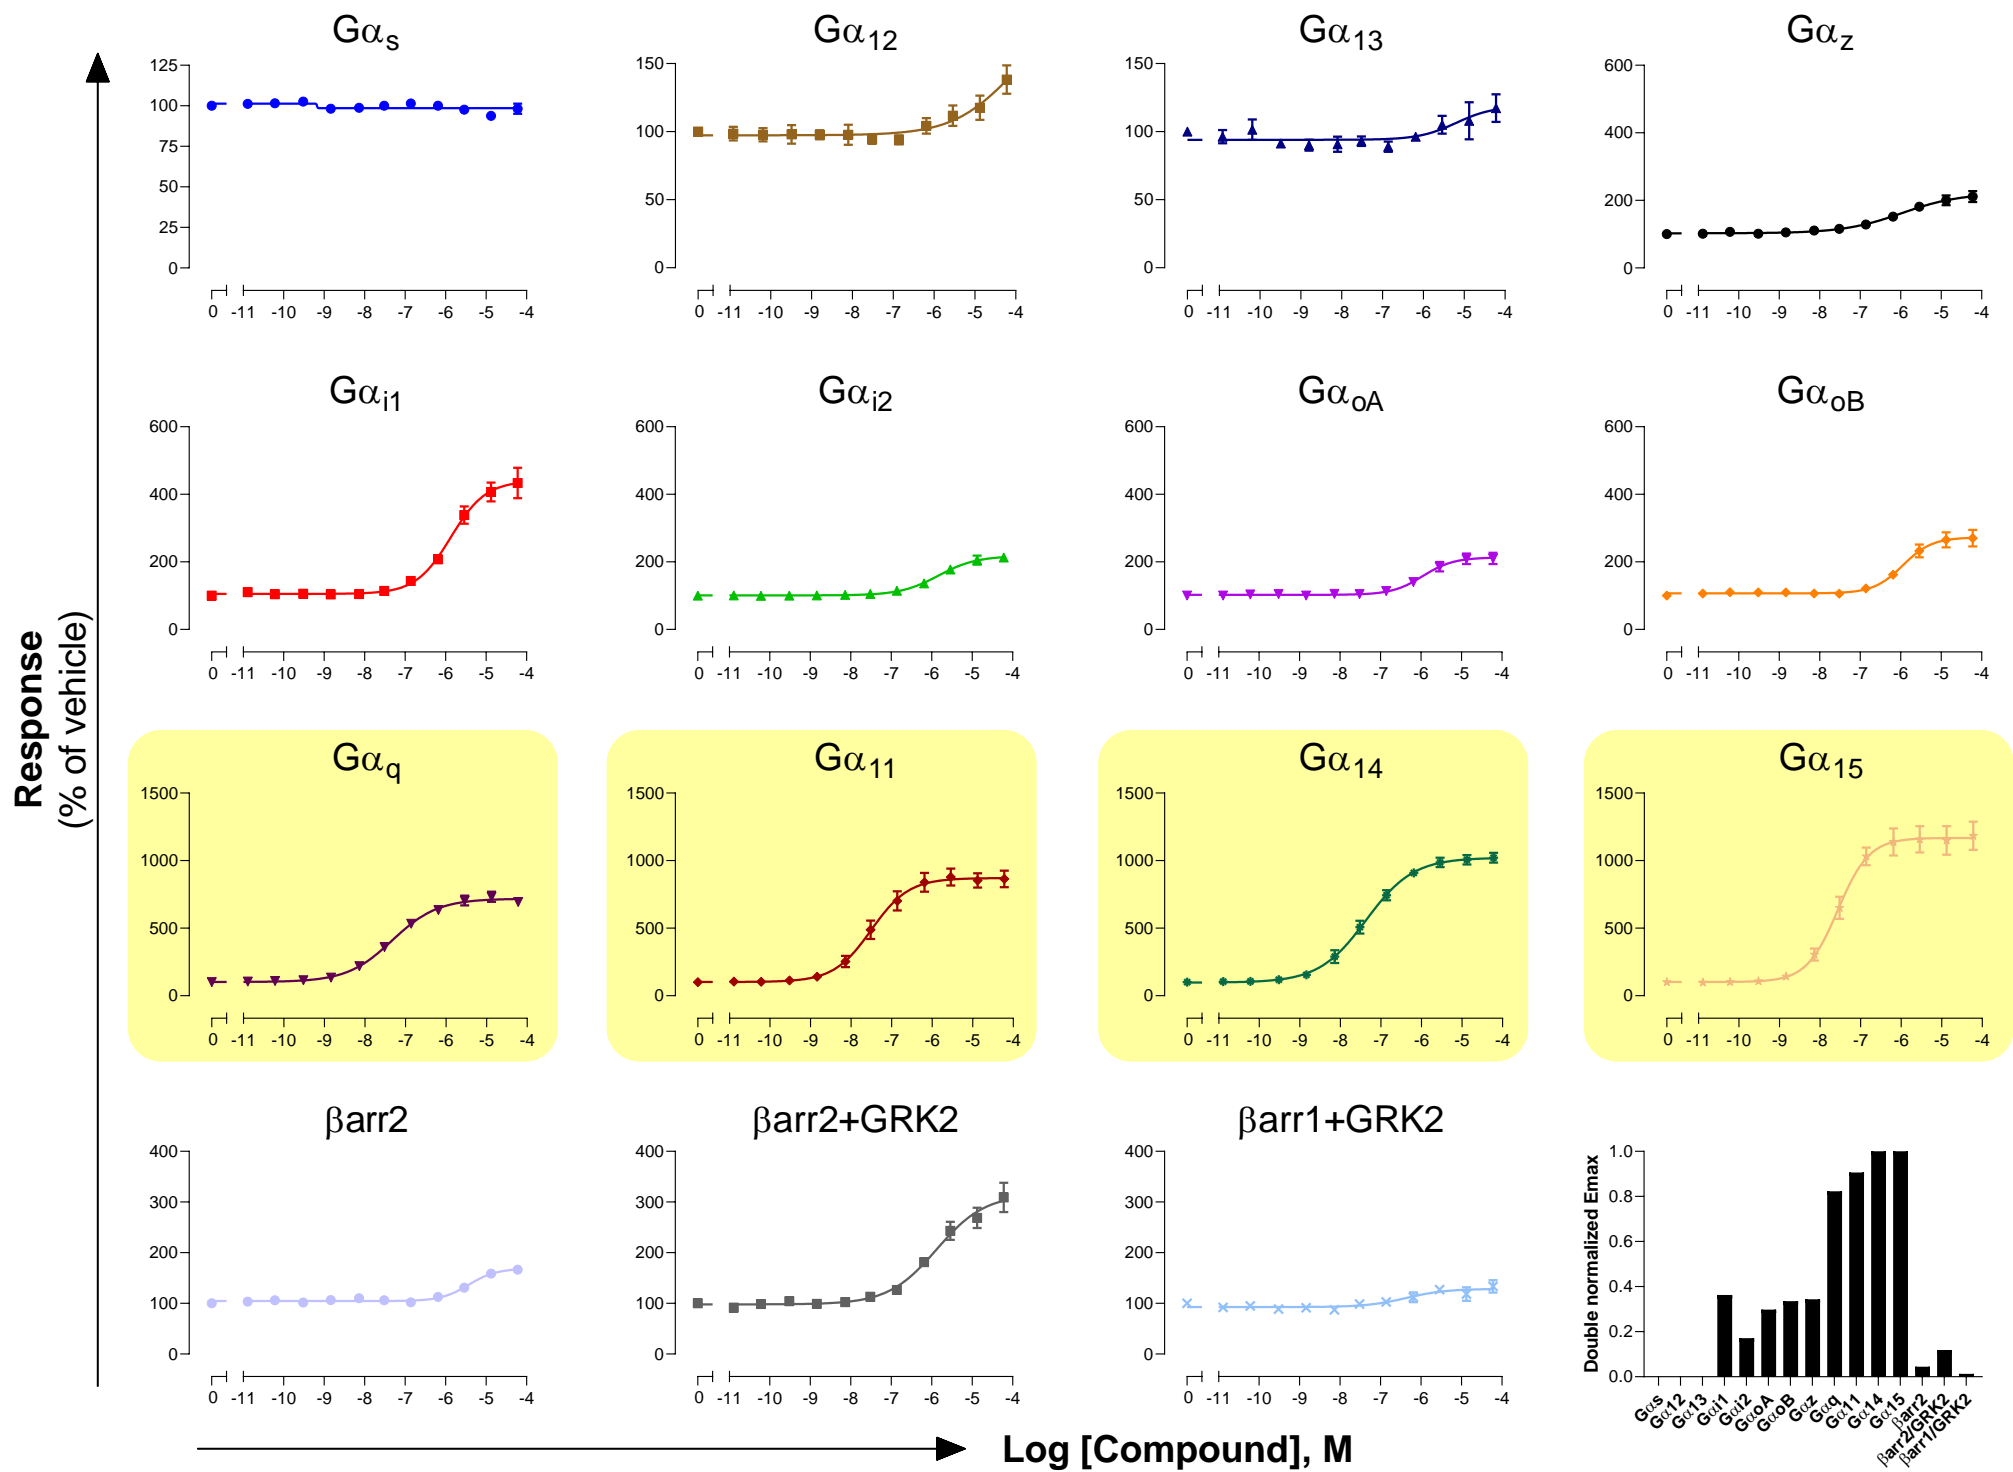

# GPCR: M<sub>4</sub>

Ligand: Acetylcholine

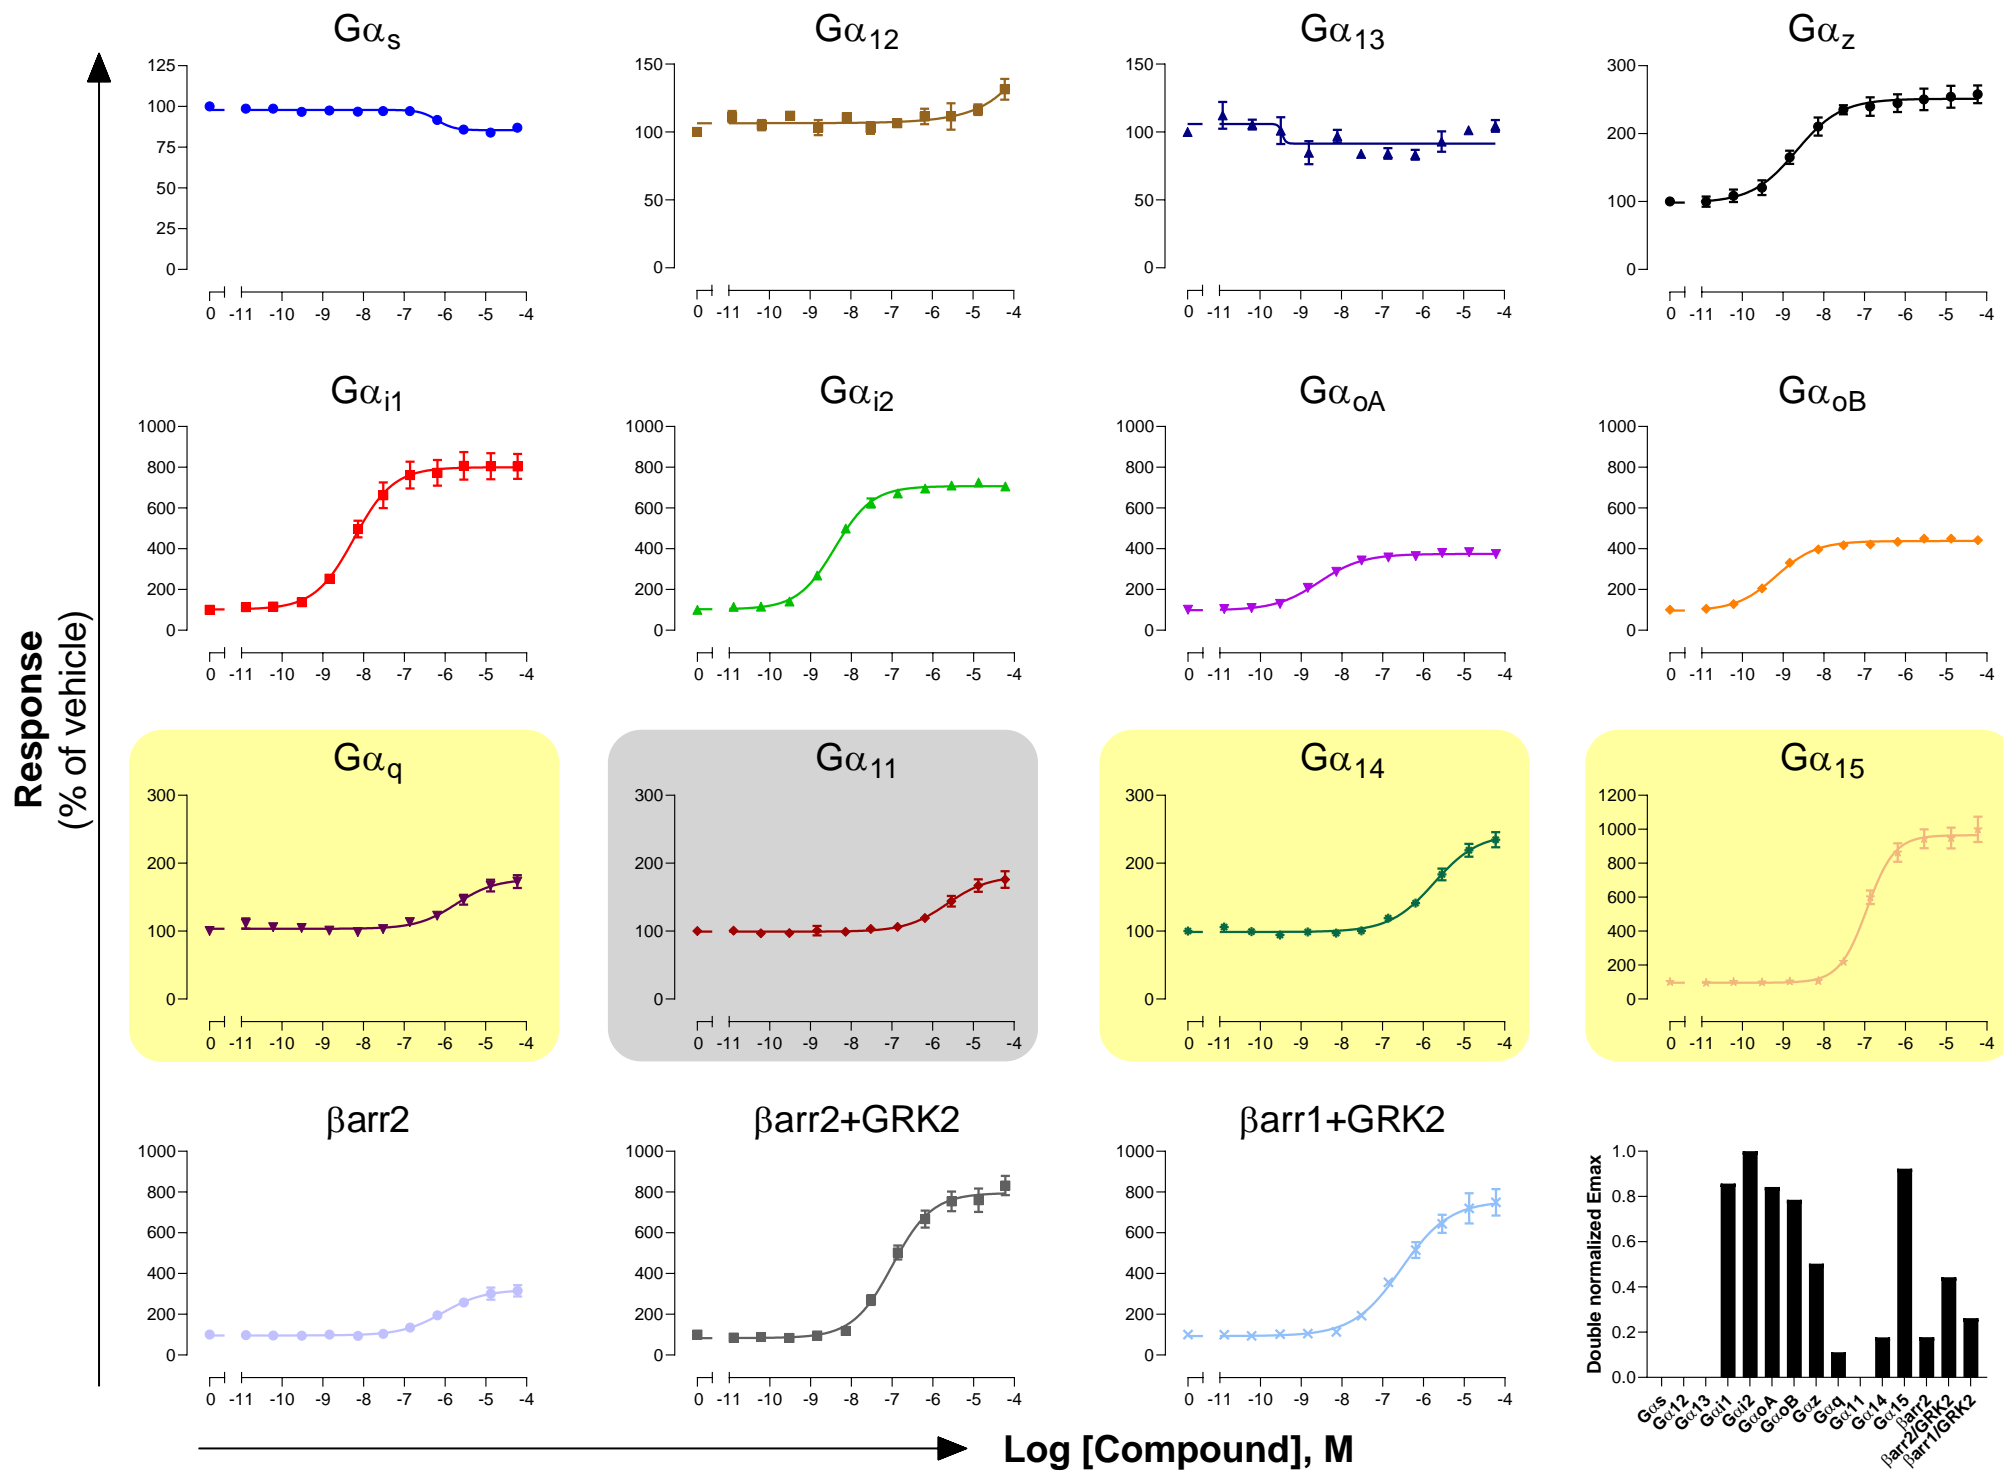

**GPCR: MC3R**  
**Ligand:  $\gamma$ -MSH**

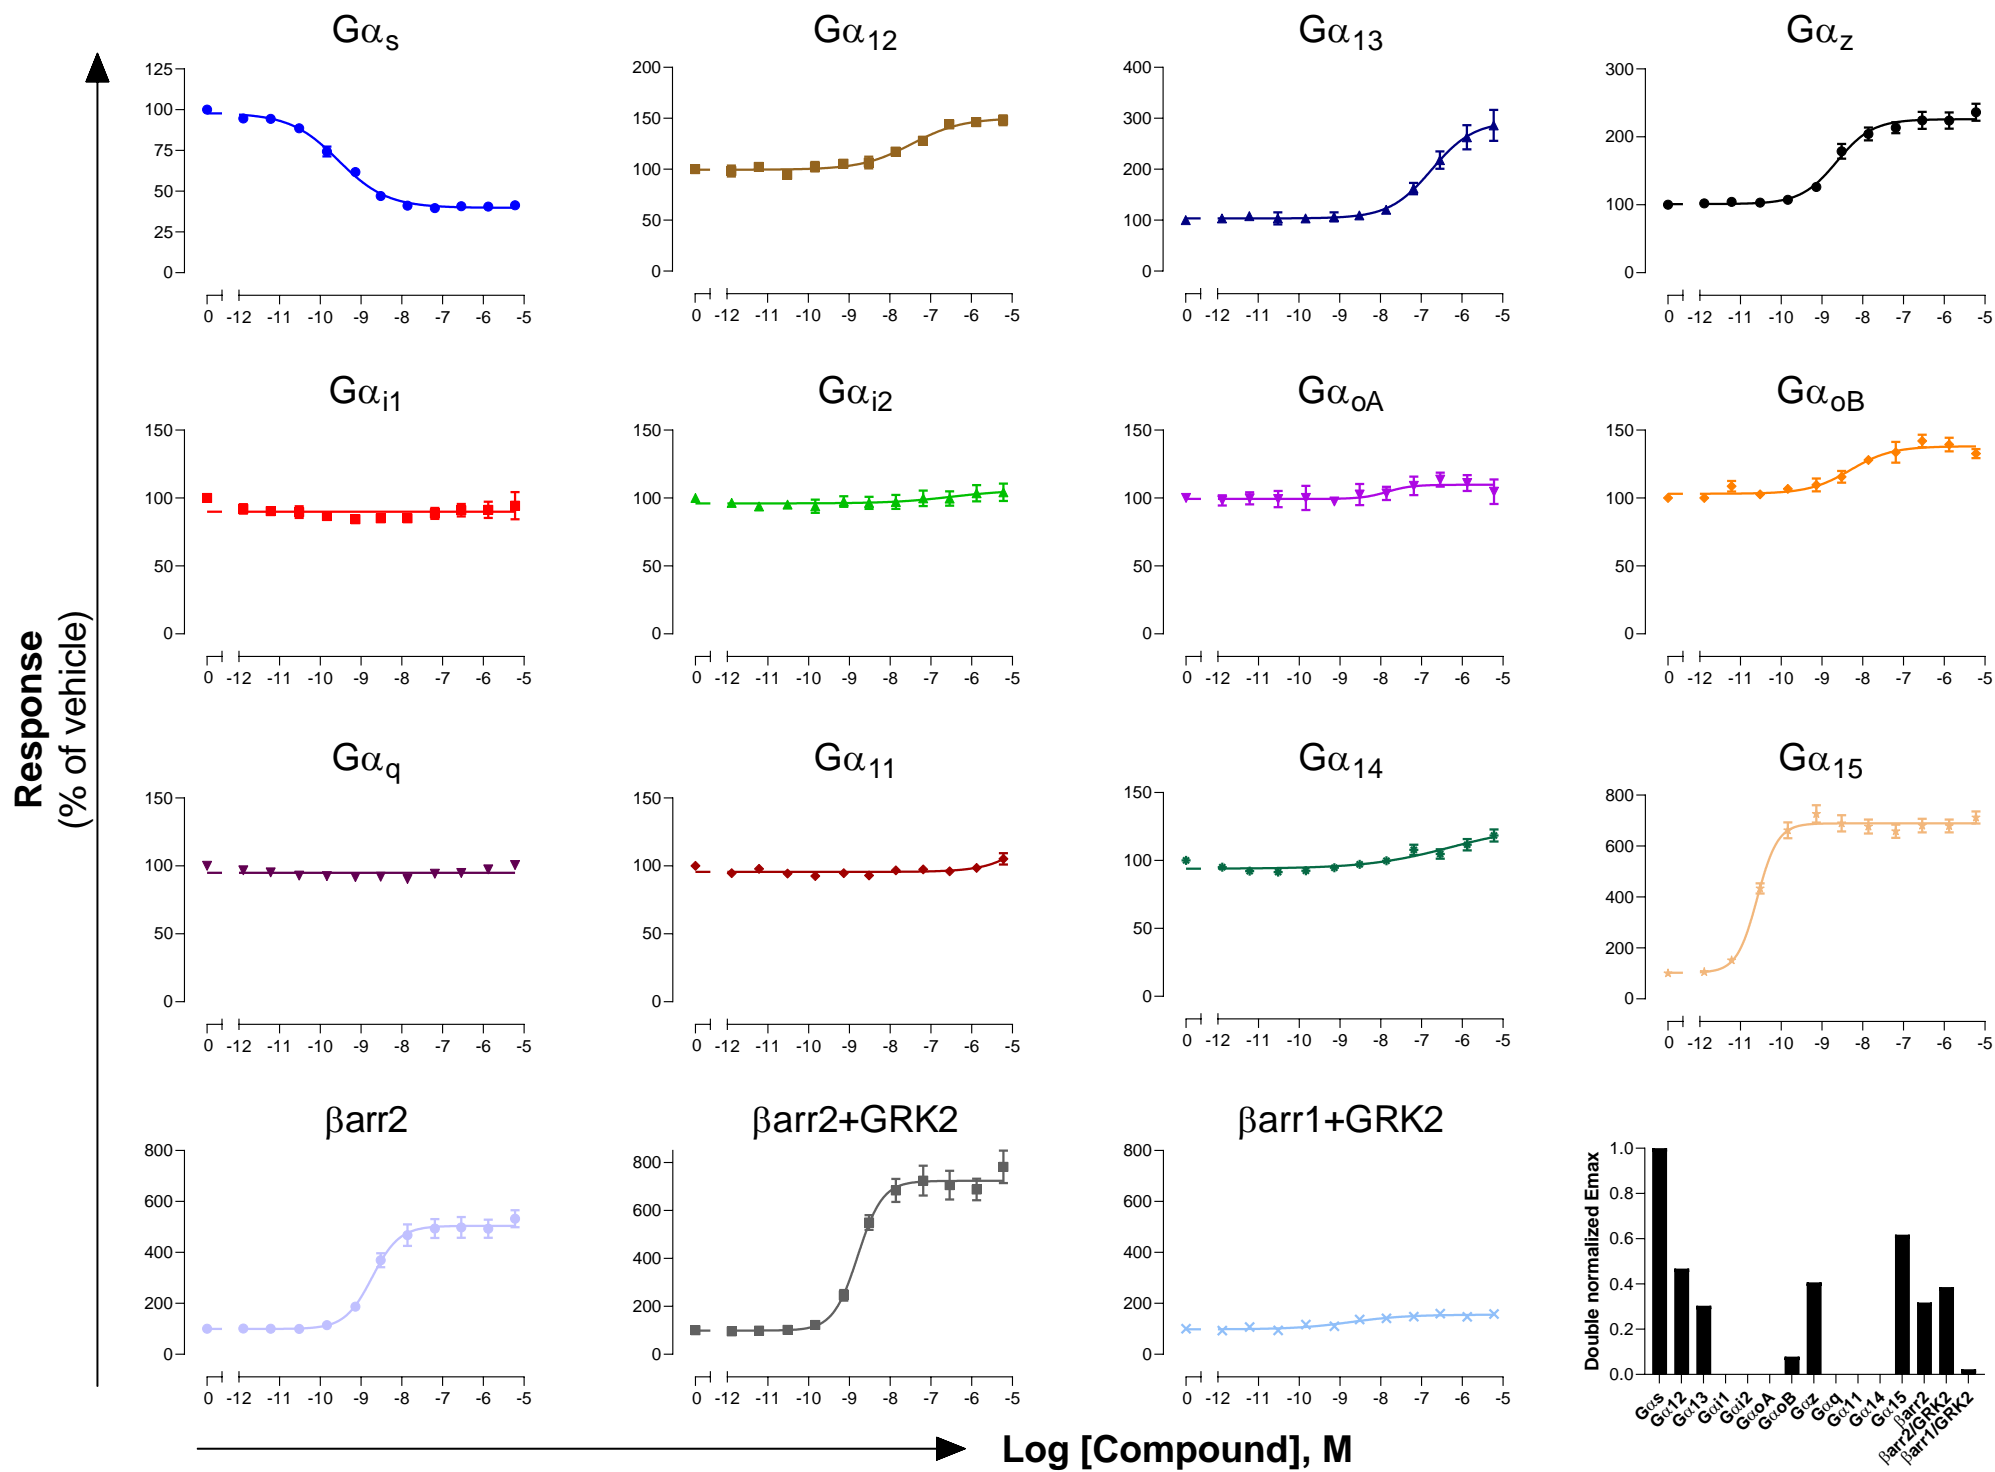

**GPCR: MC4R**  
**Ligand:  $\alpha$ -MSH**

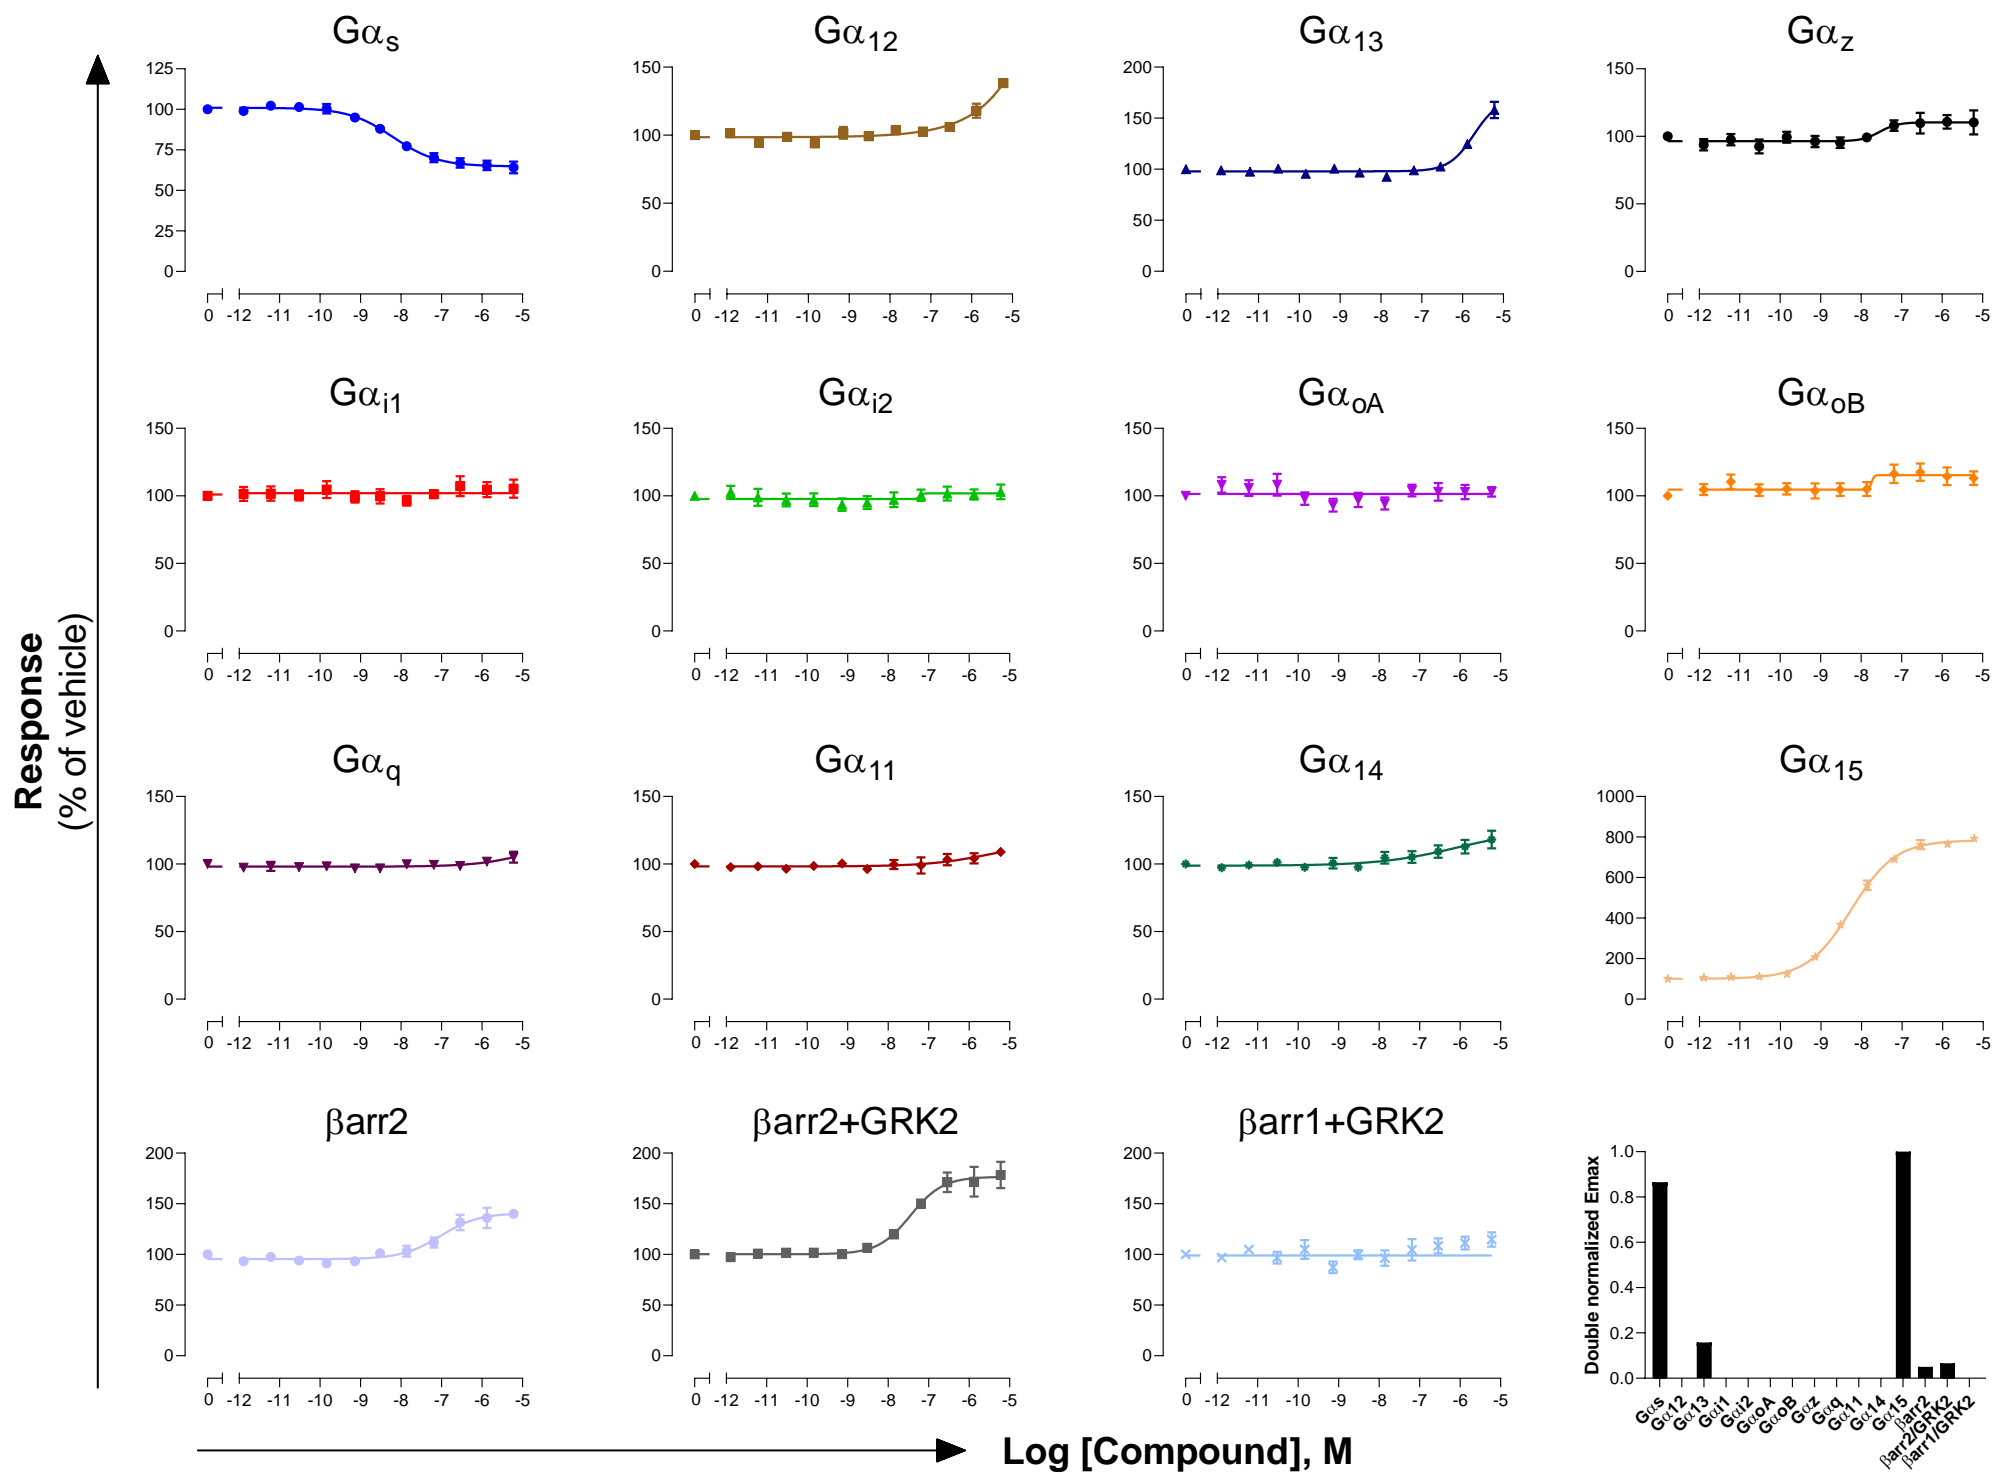

**GPCR: mGluR2**  
**Ligand: Glutamate**

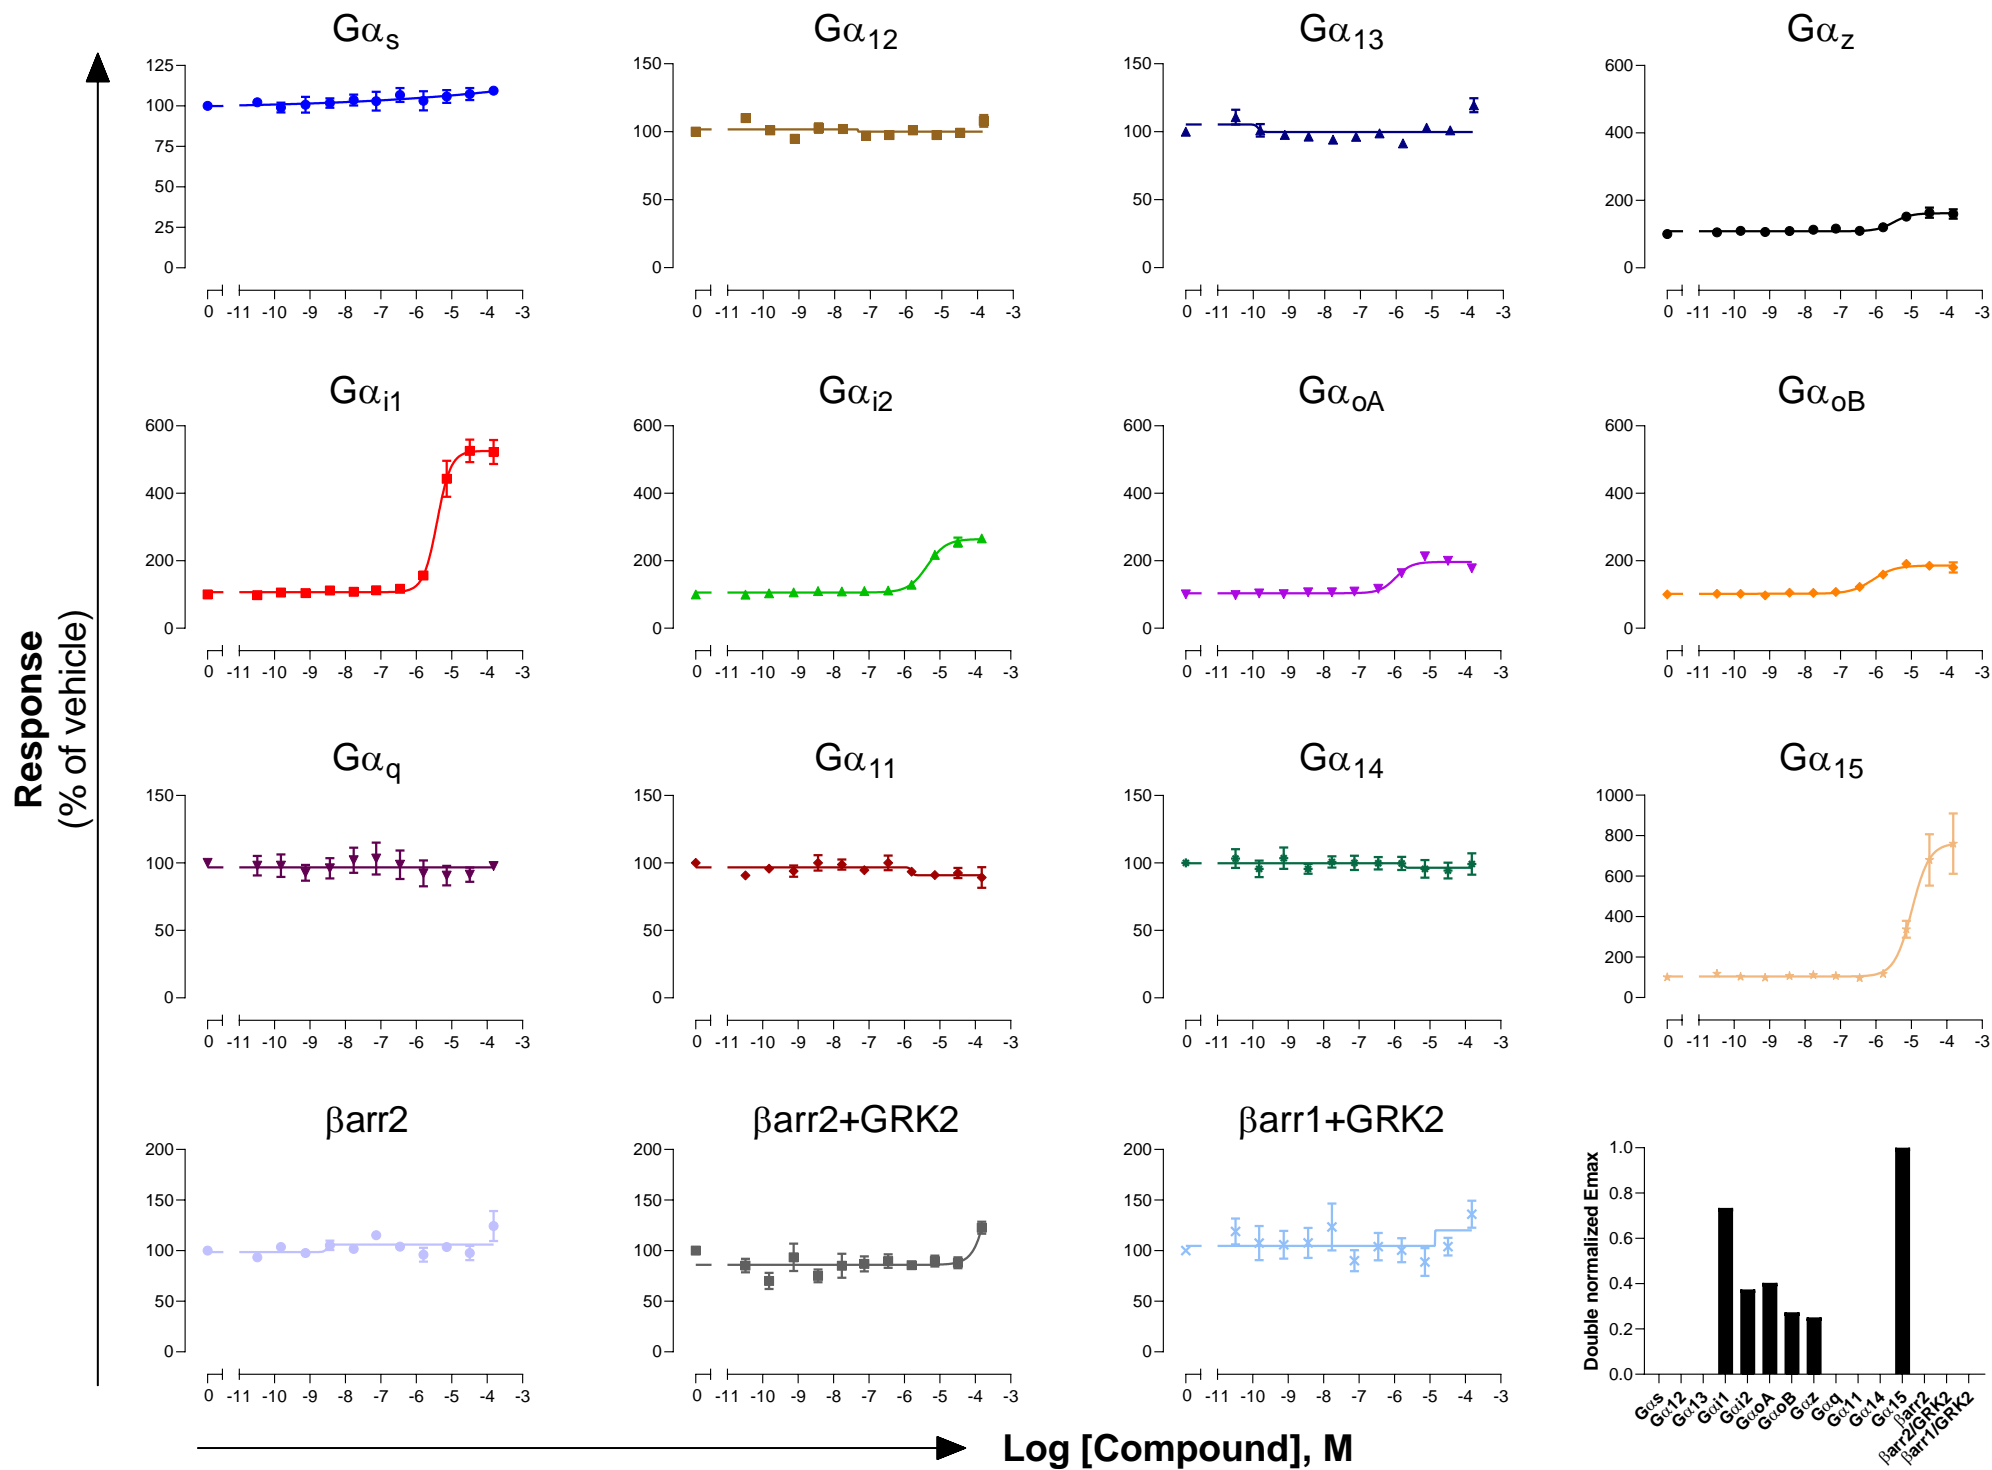

**GPCR: mGluR4**  
**Ligand: Glutamate**

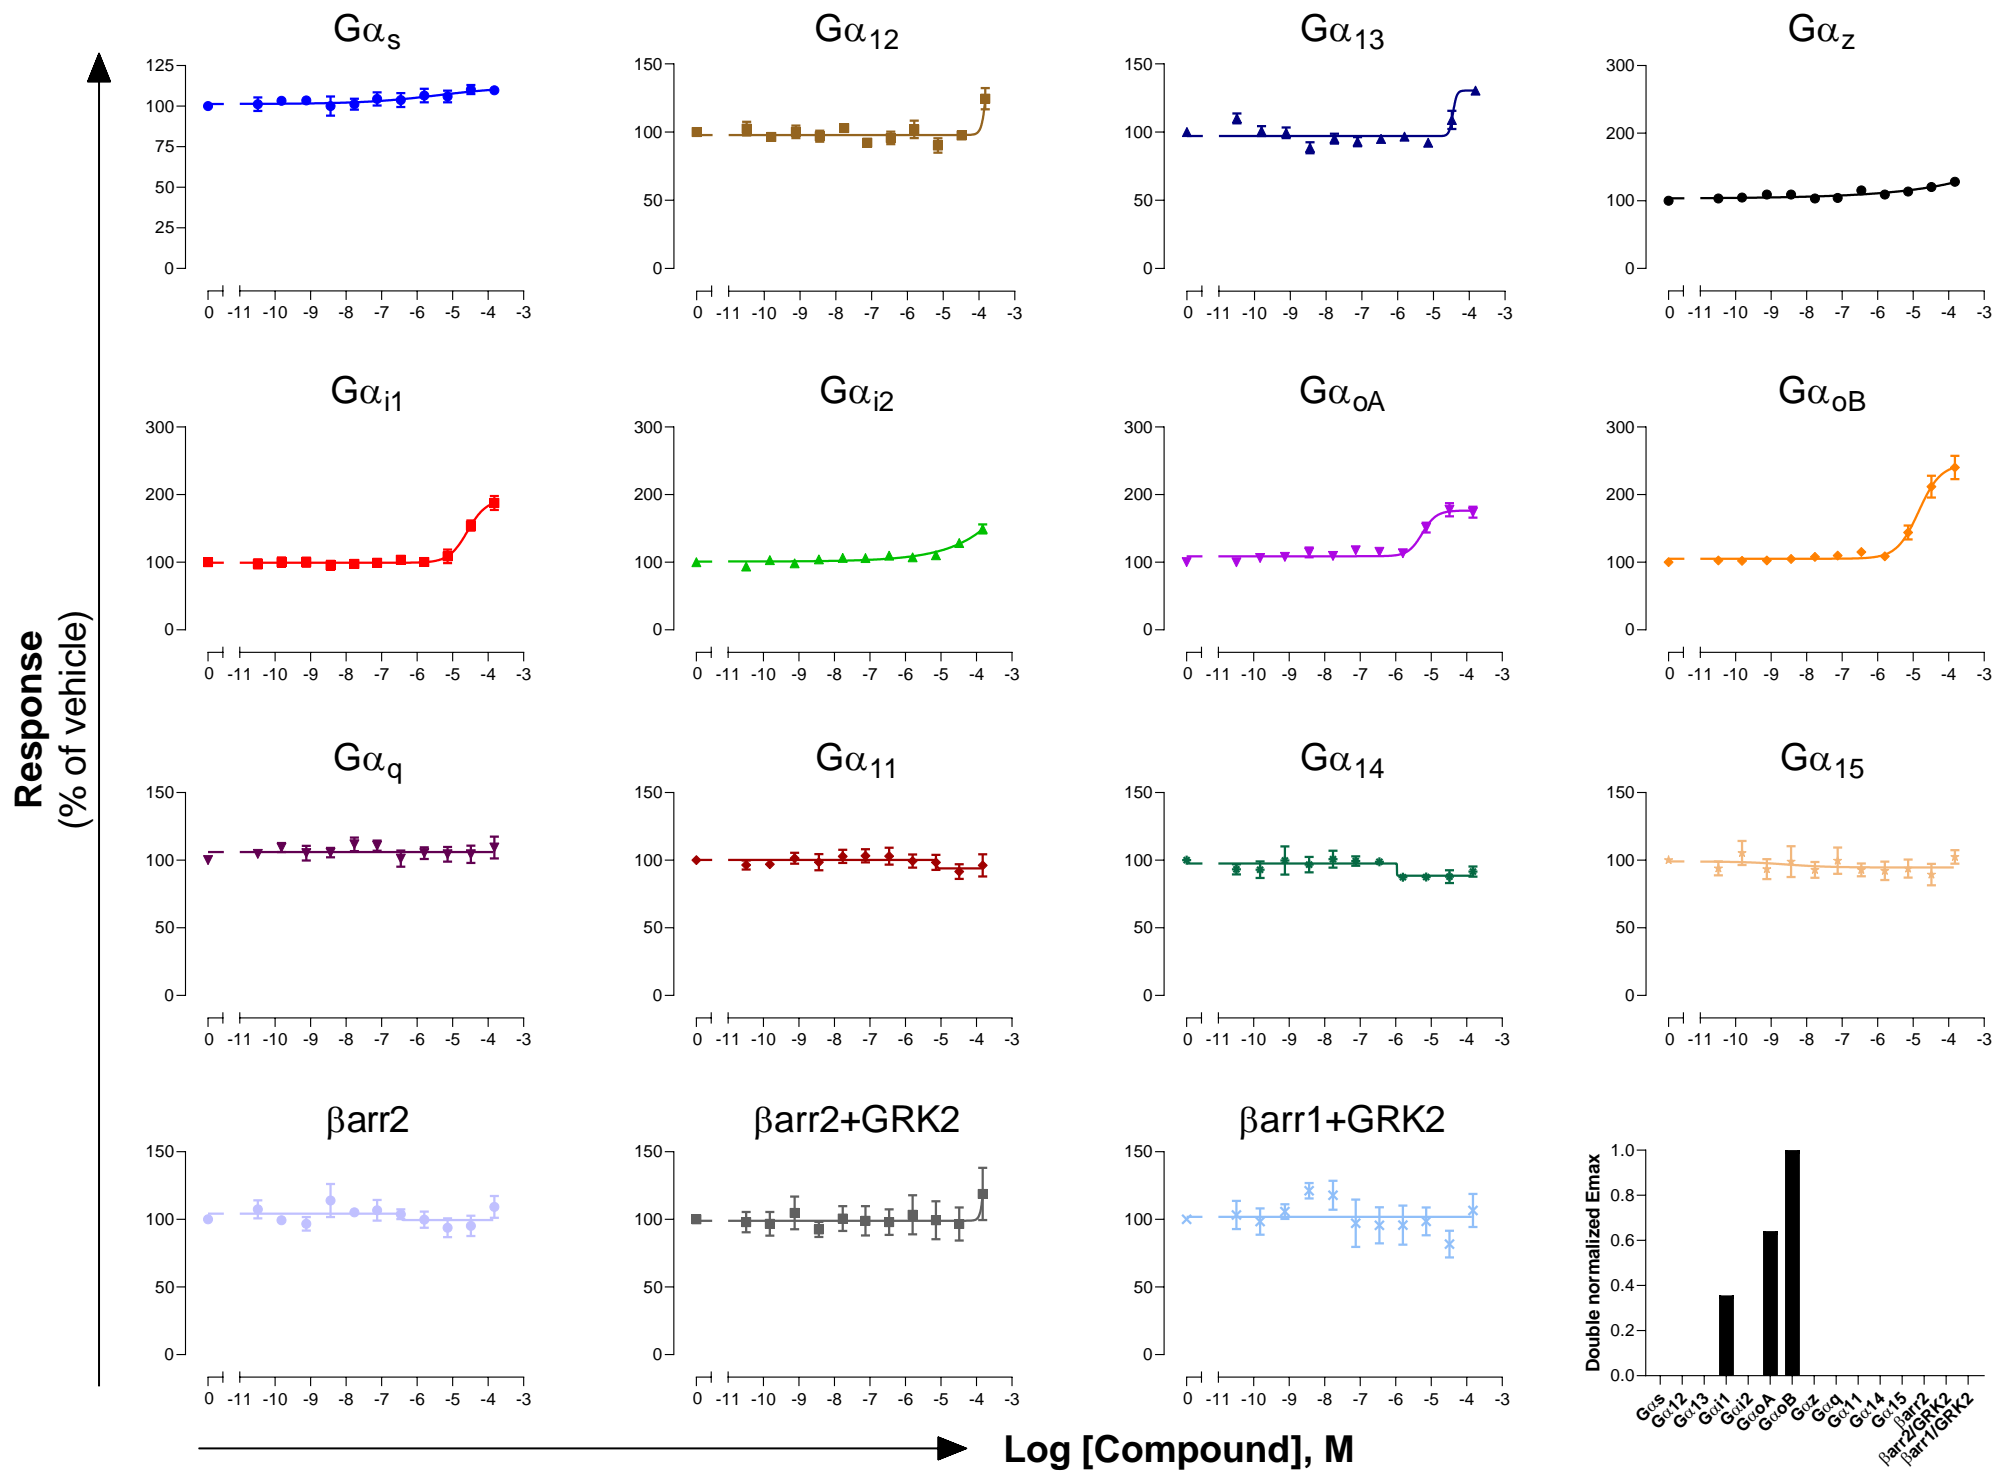

**GPCR: mGluR5**  
**Ligand: Glutamate**

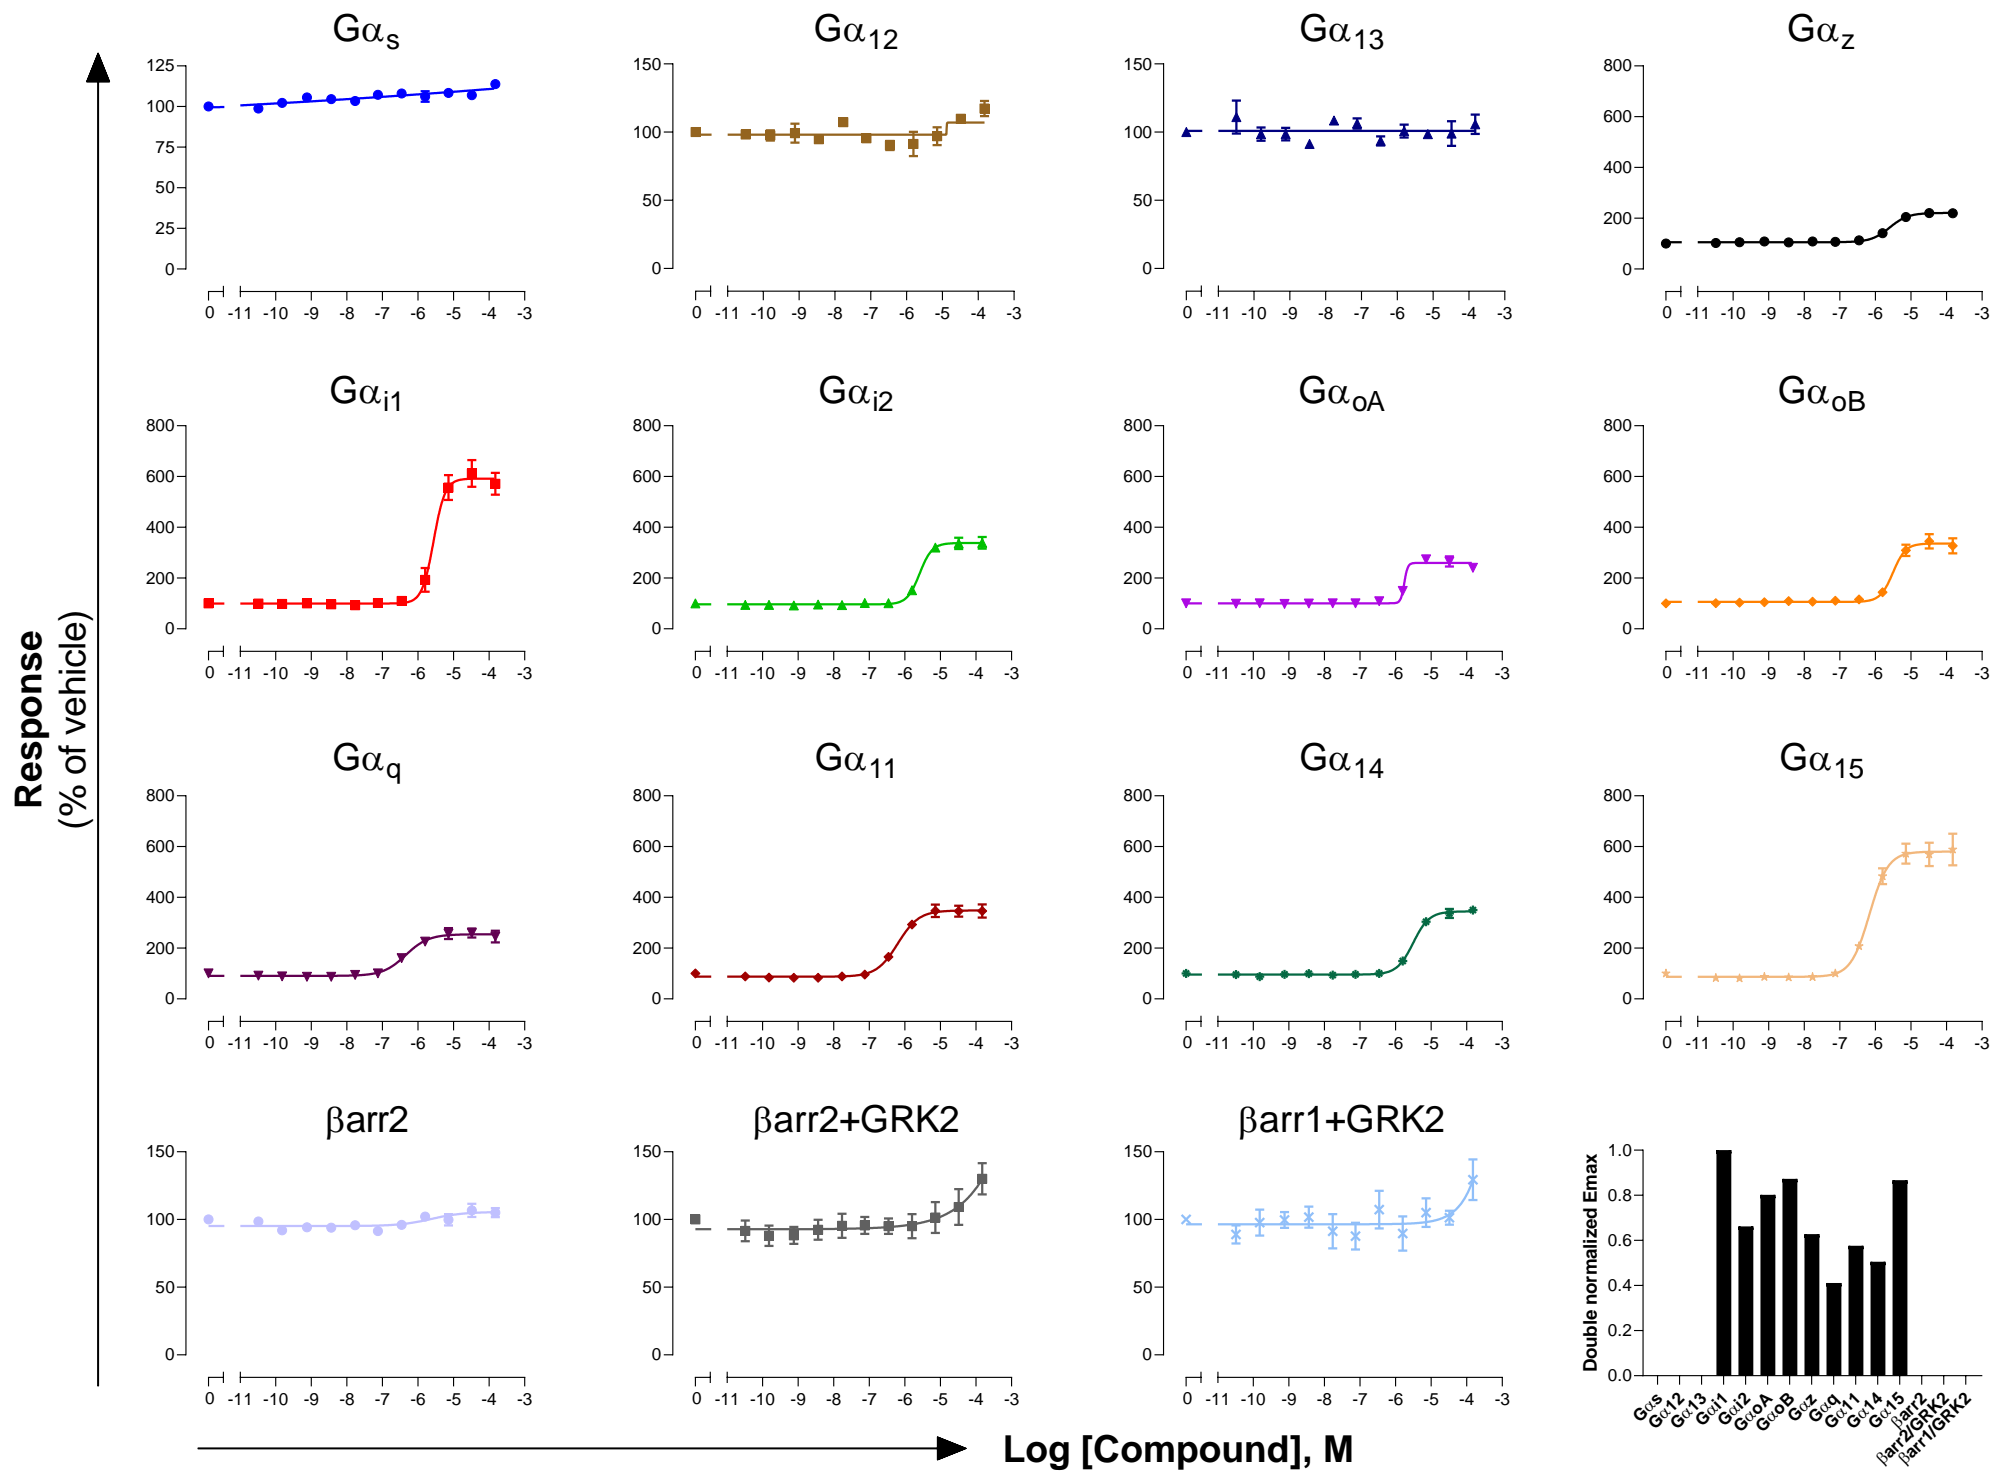

**GPCR: mGluR6**  
**Ligand: Glutamate**

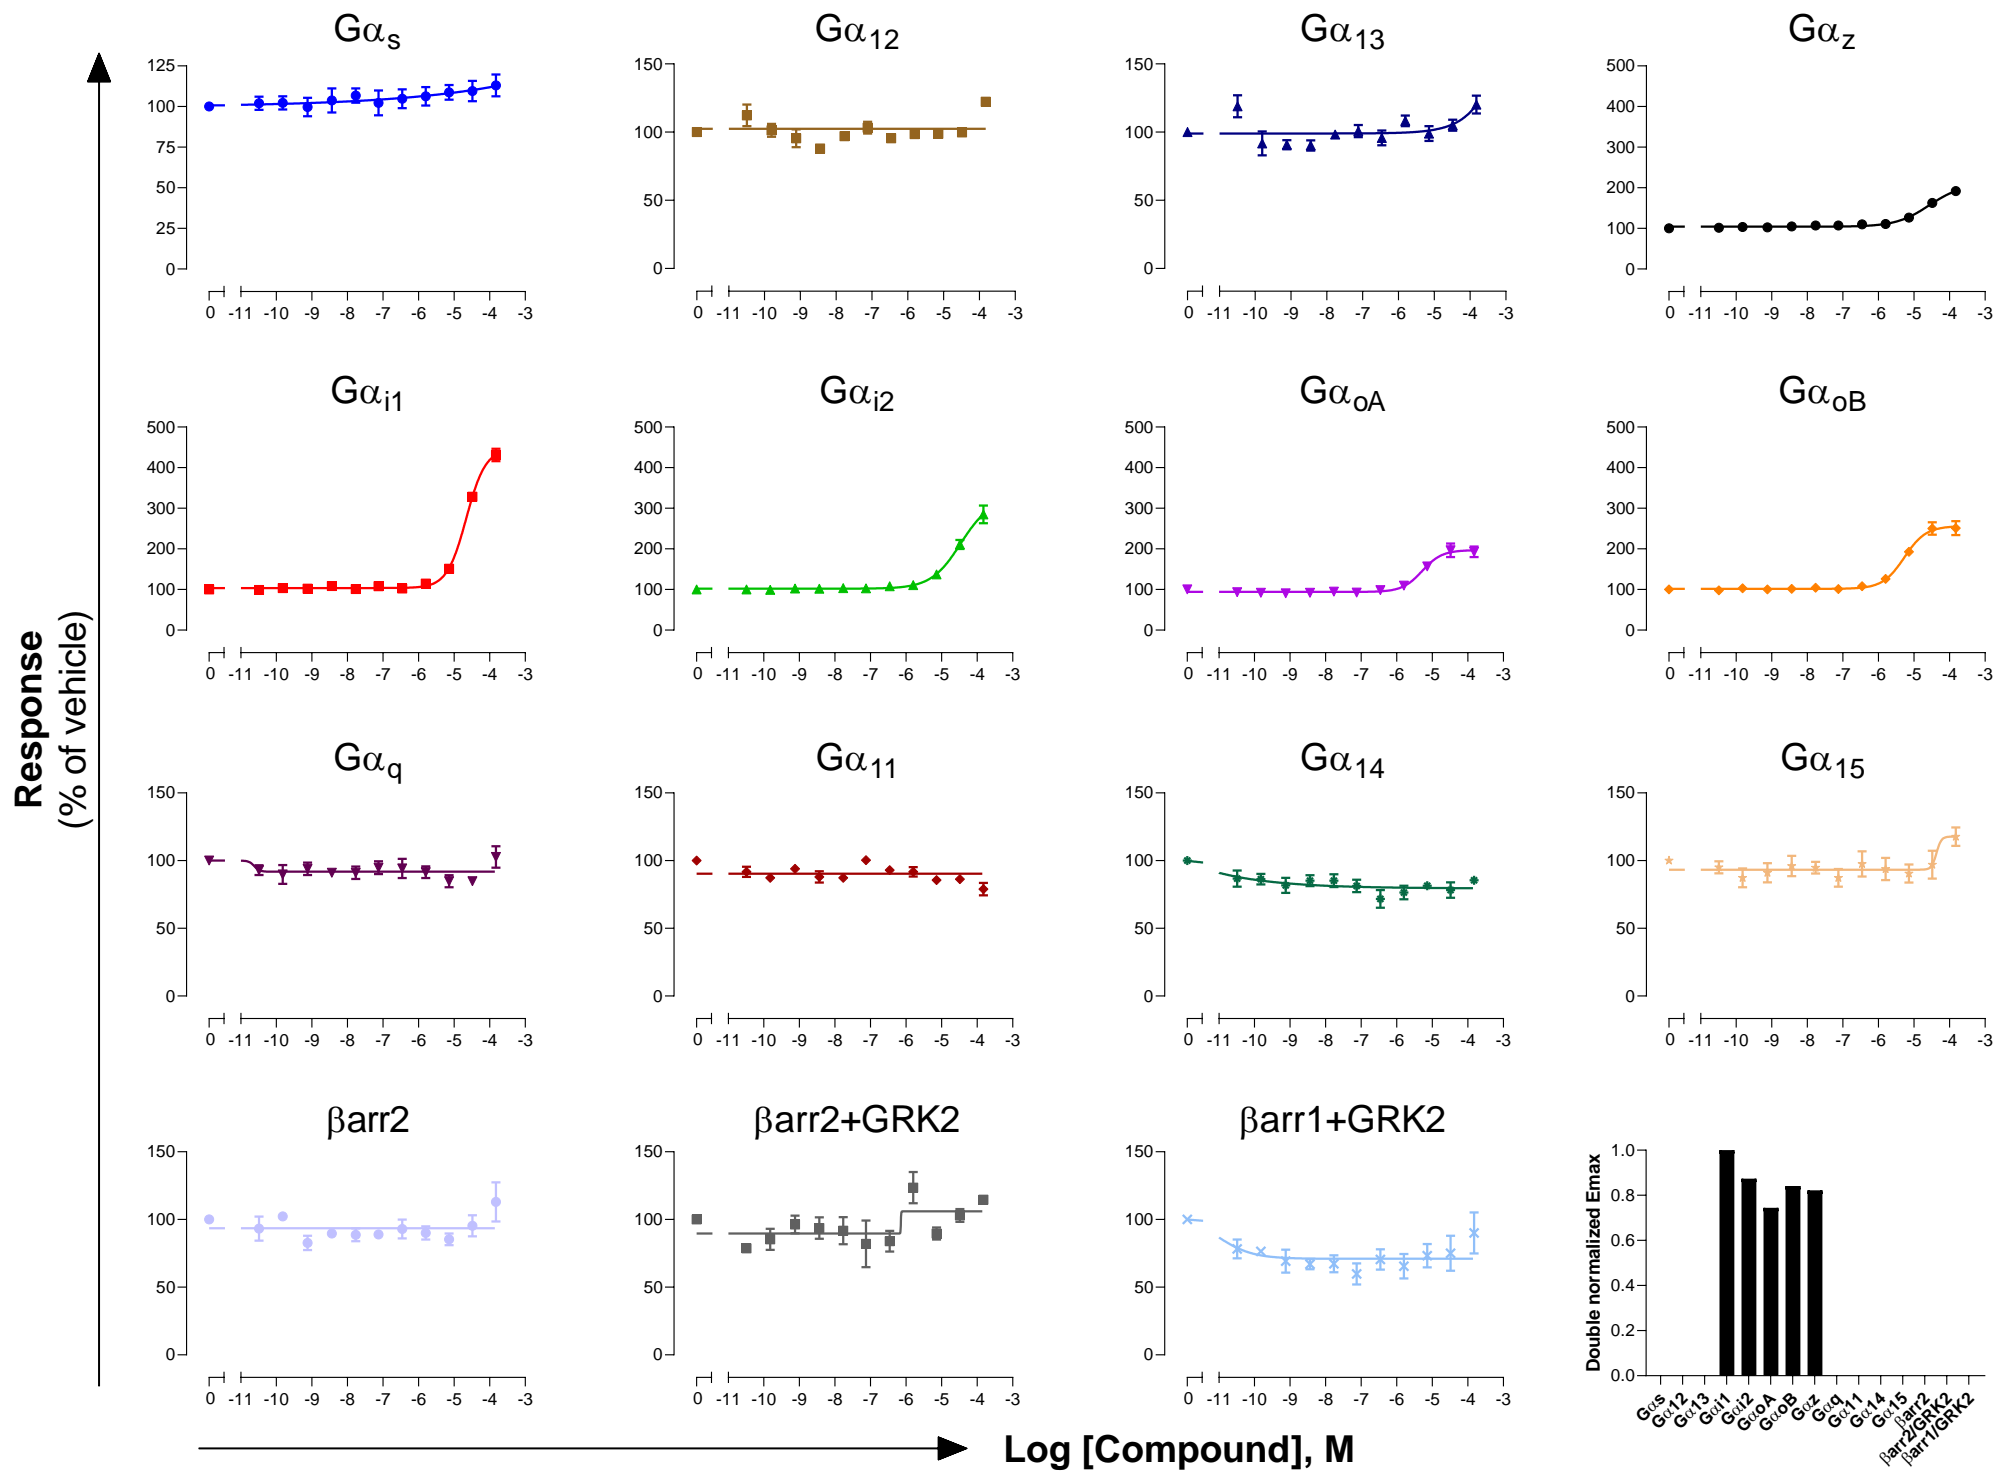



**GPCR: mGluR8**  
**Ligand: Glutamate**

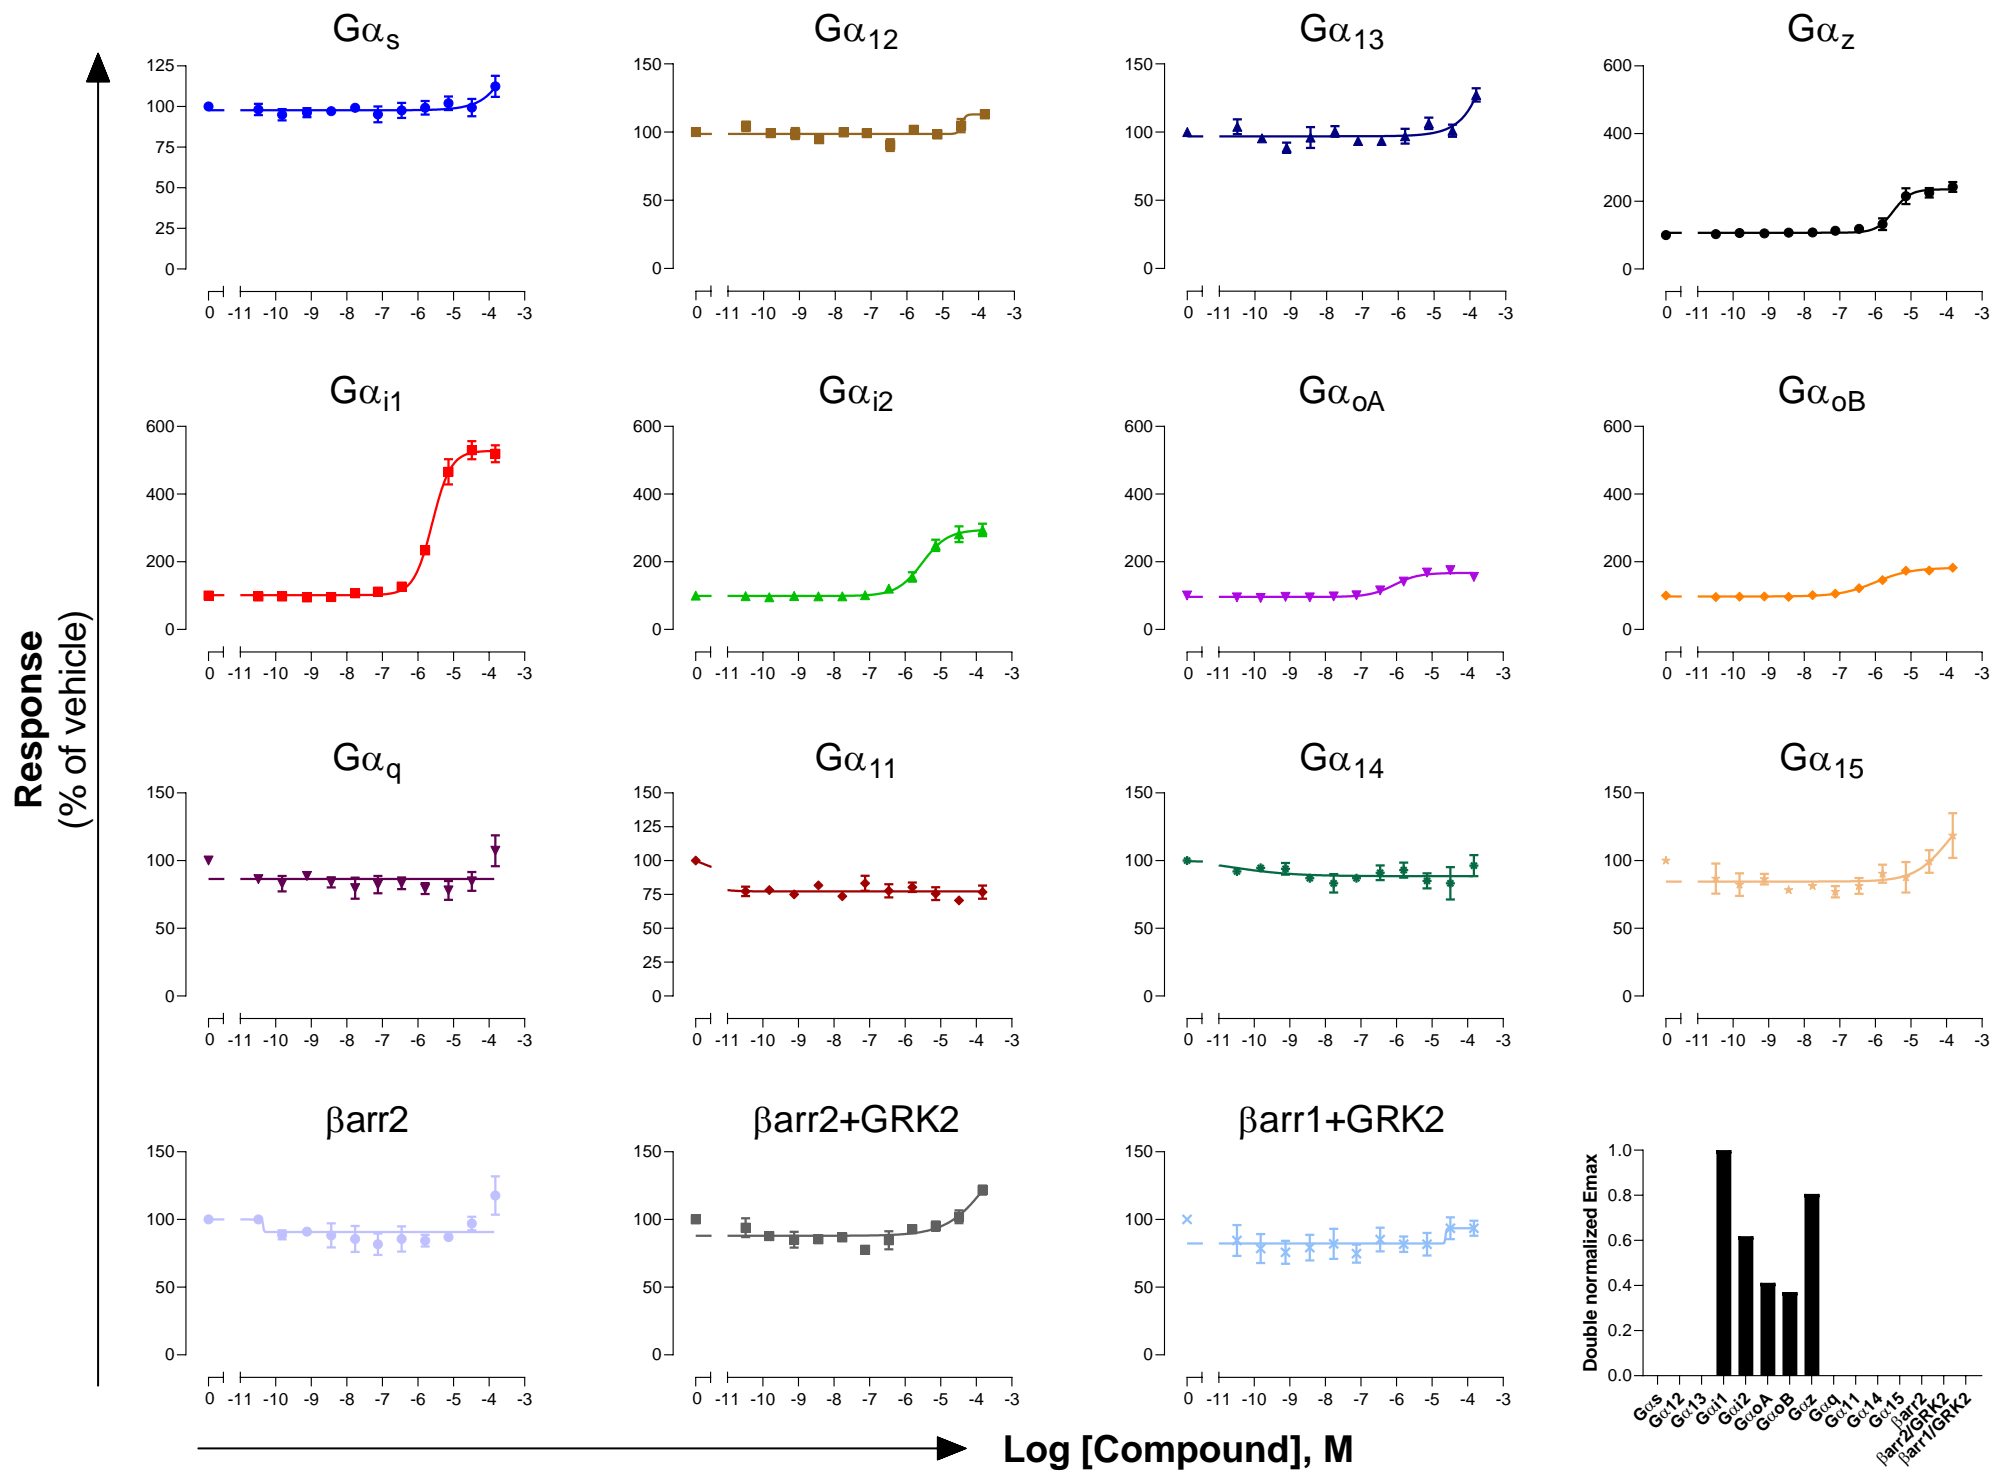

**GPCR:  $\mu$ OR**  
**Ligand: DAMGO**

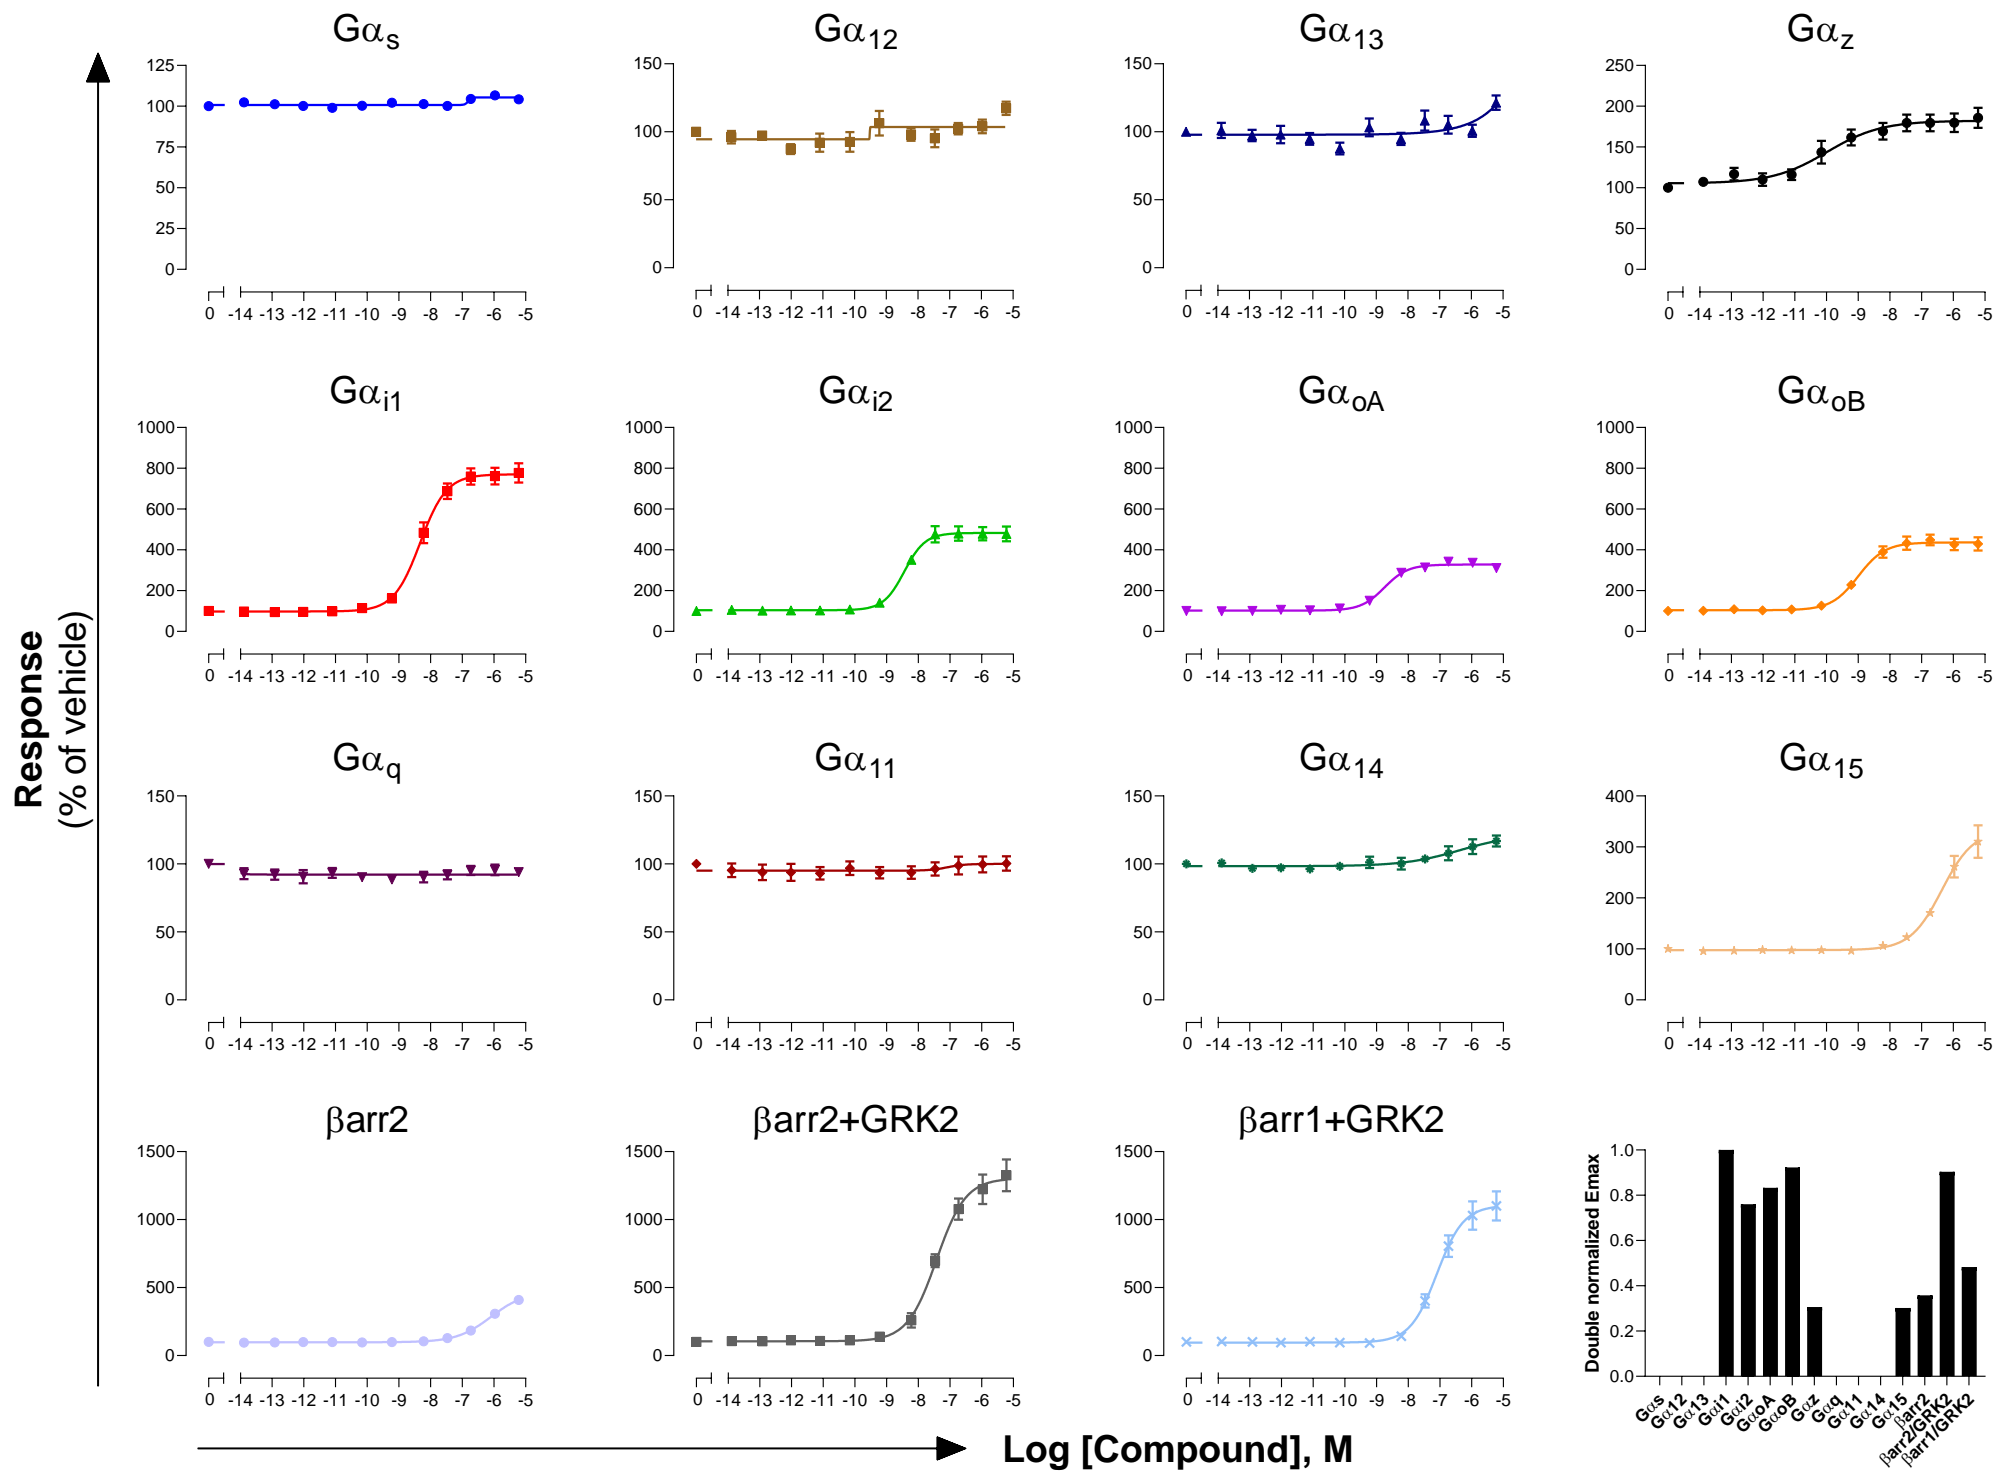

# GPCR: MT<sub>1</sub>

Ligand: Melatonin

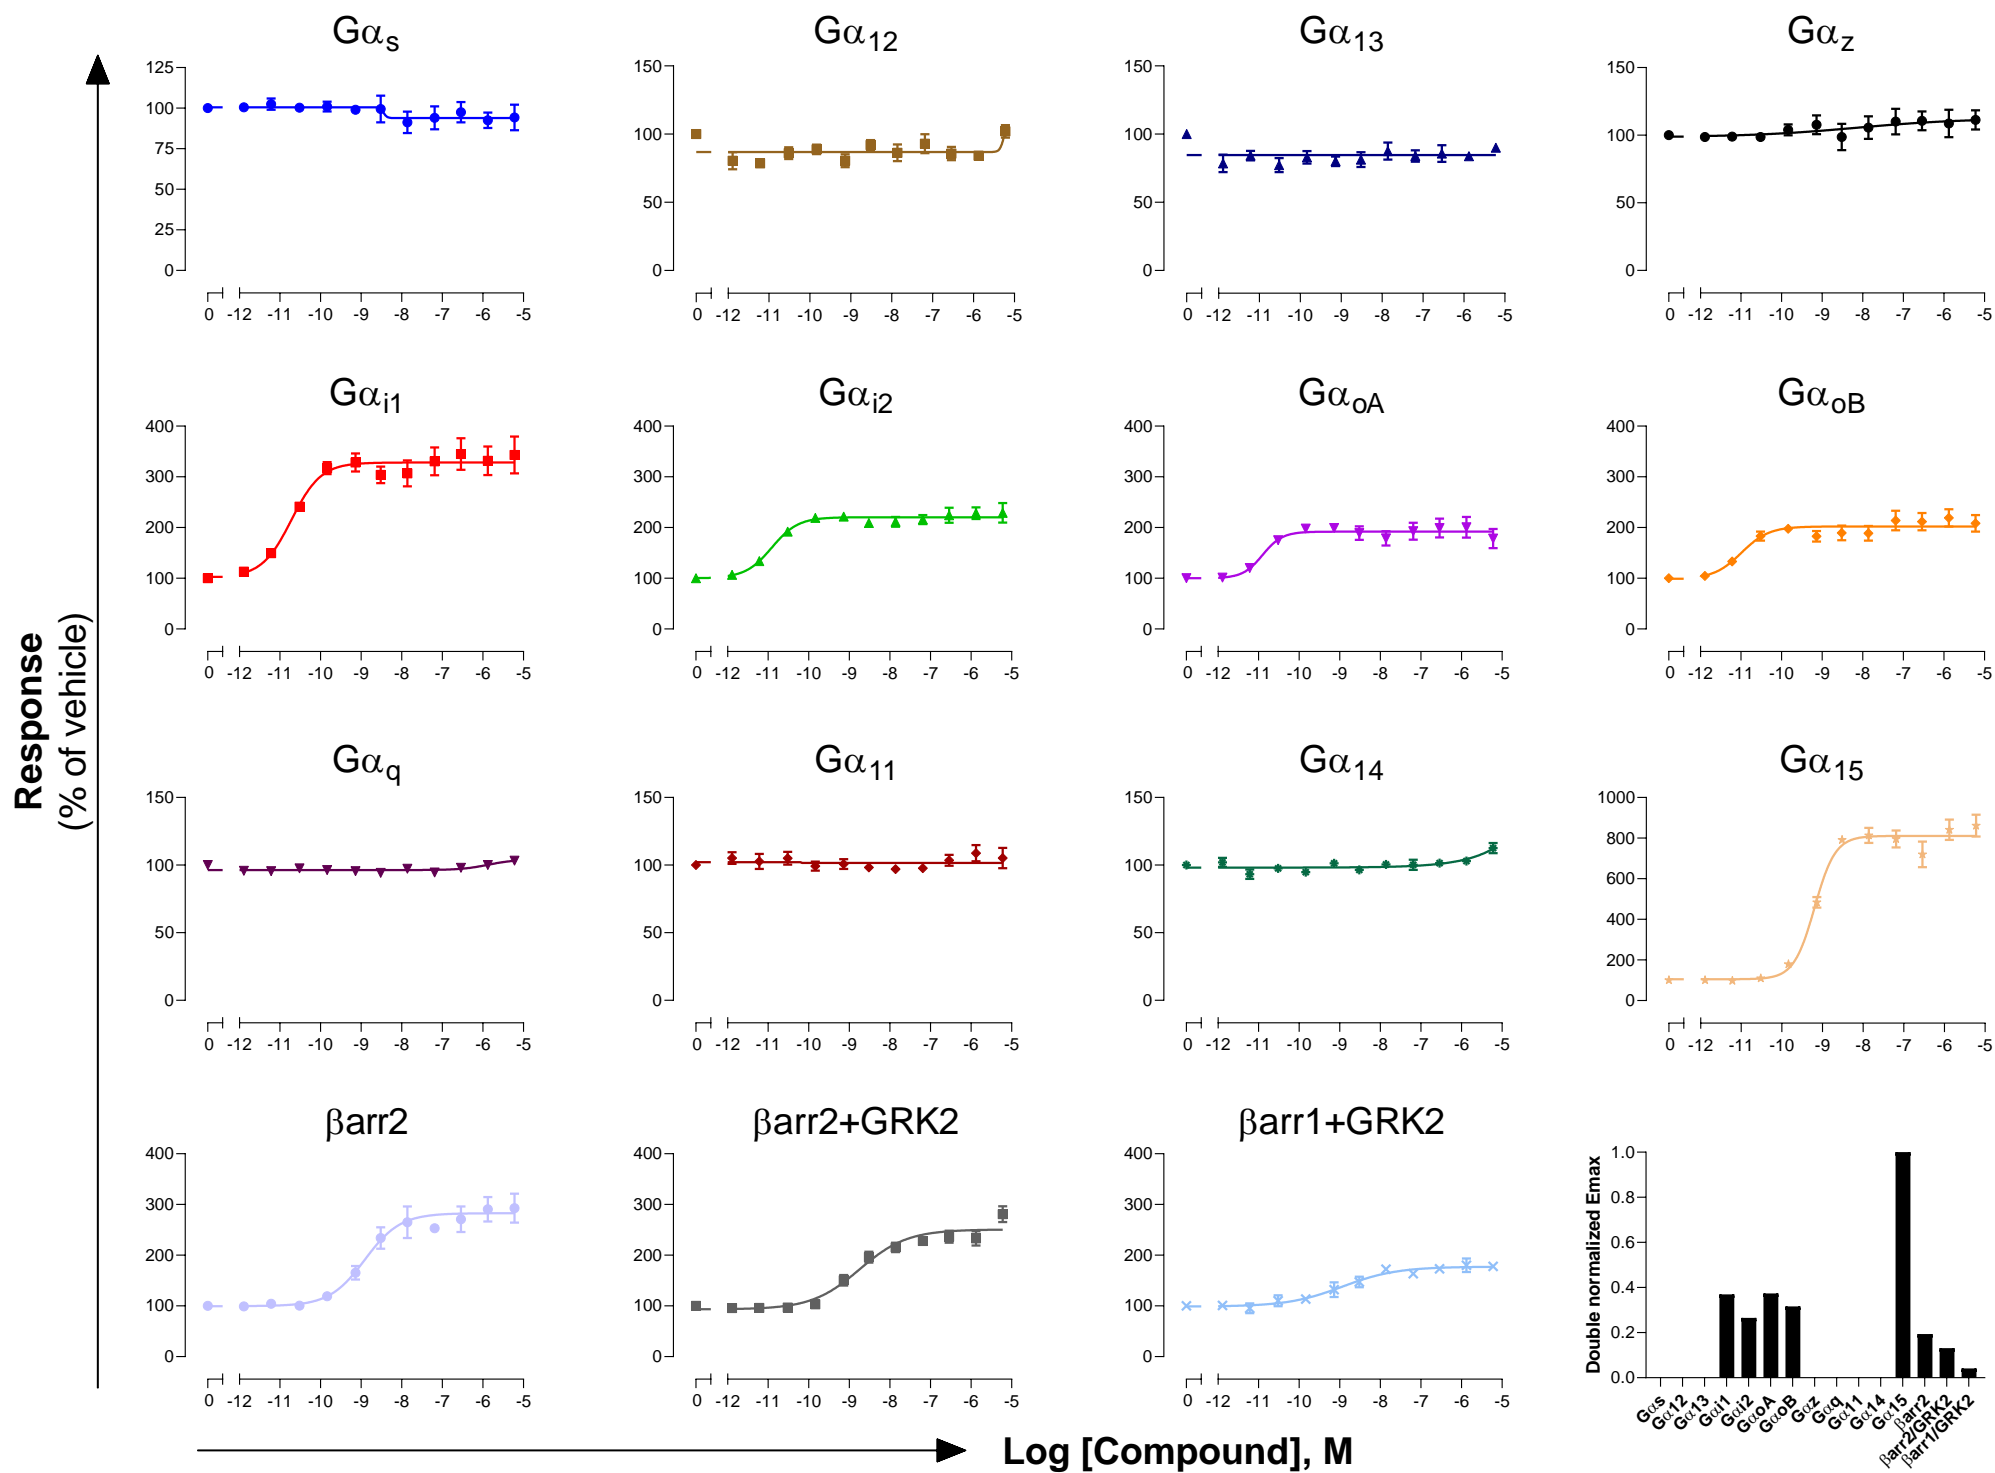

# GPCR: MT<sub>2</sub>

Ligand: Melatonin

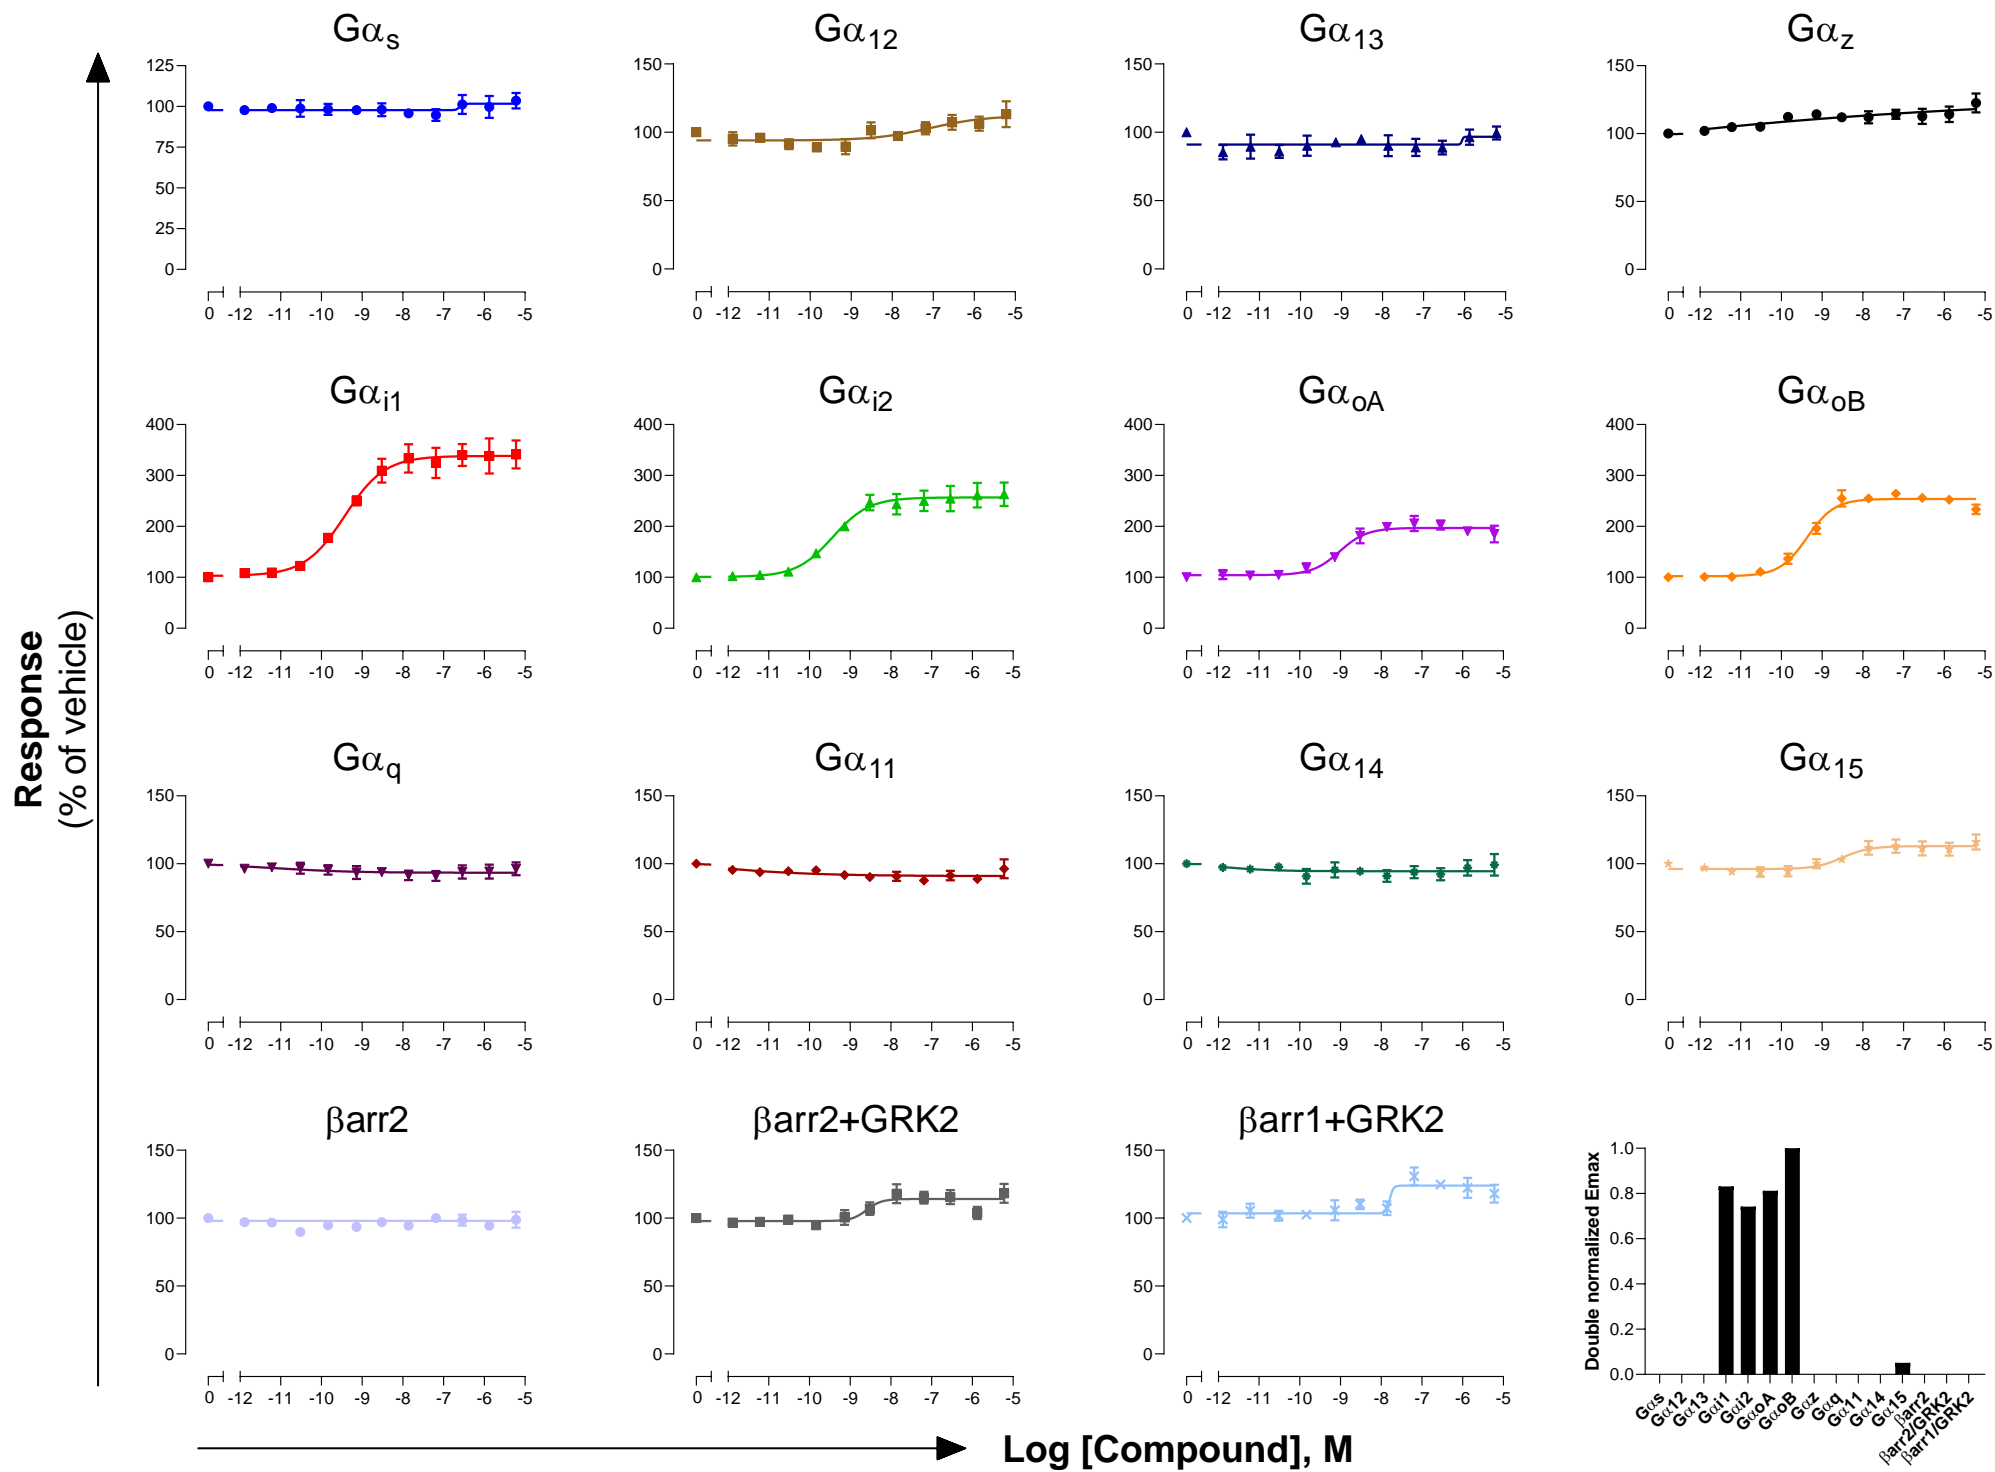

# GPCR: NOP

## Ligand: Nociceptin

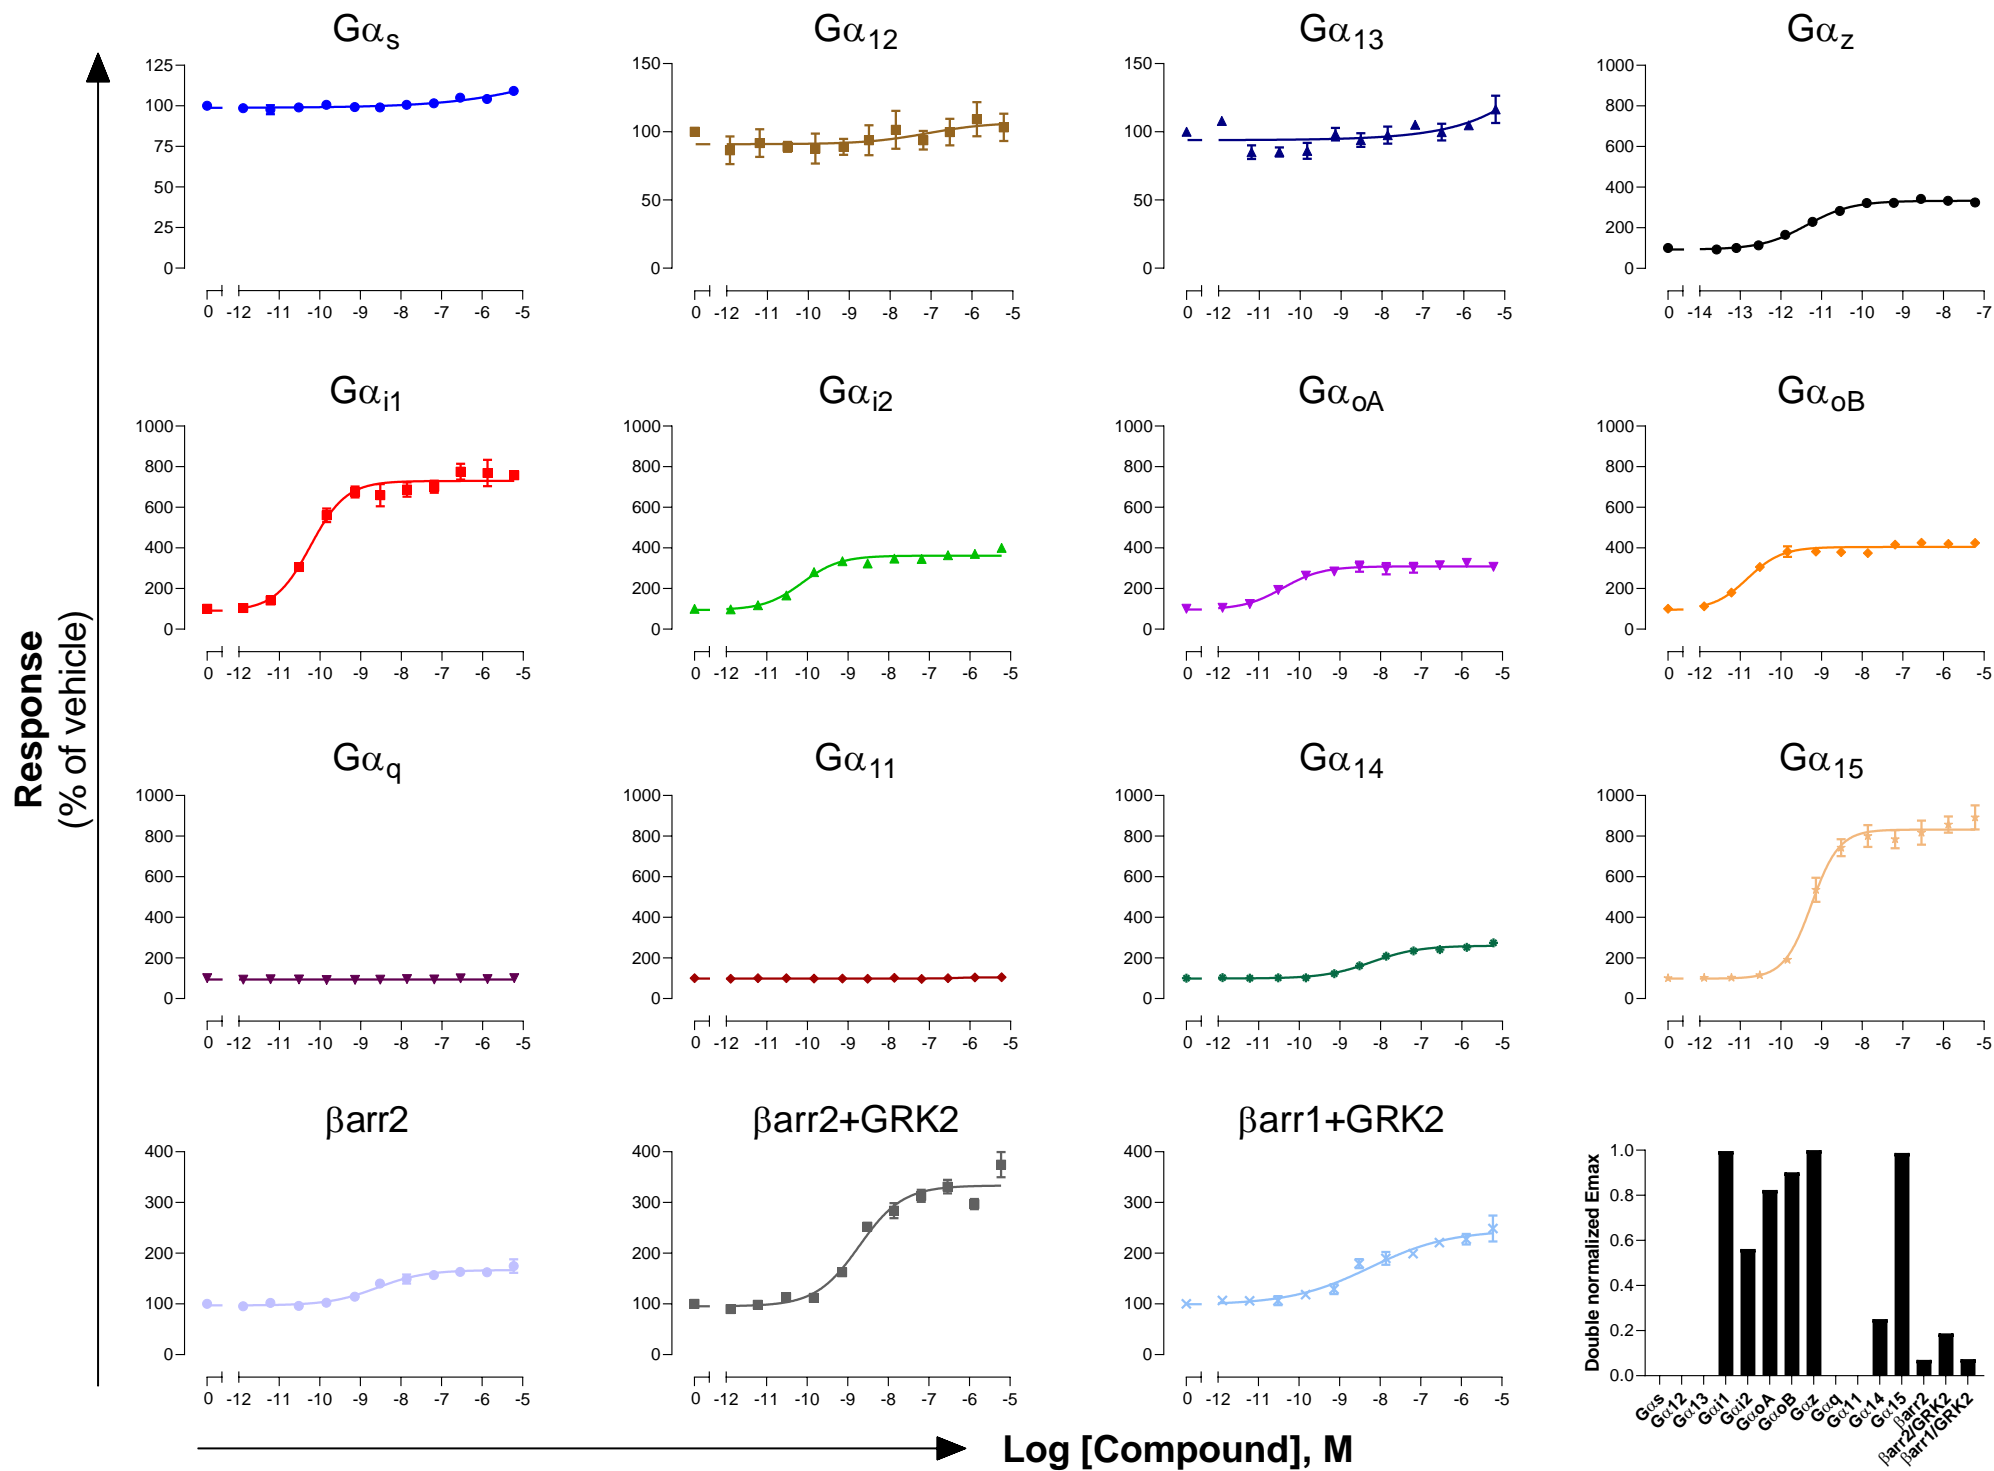

**GPCR: NPFF1**  
**Ligand: RFRP3**

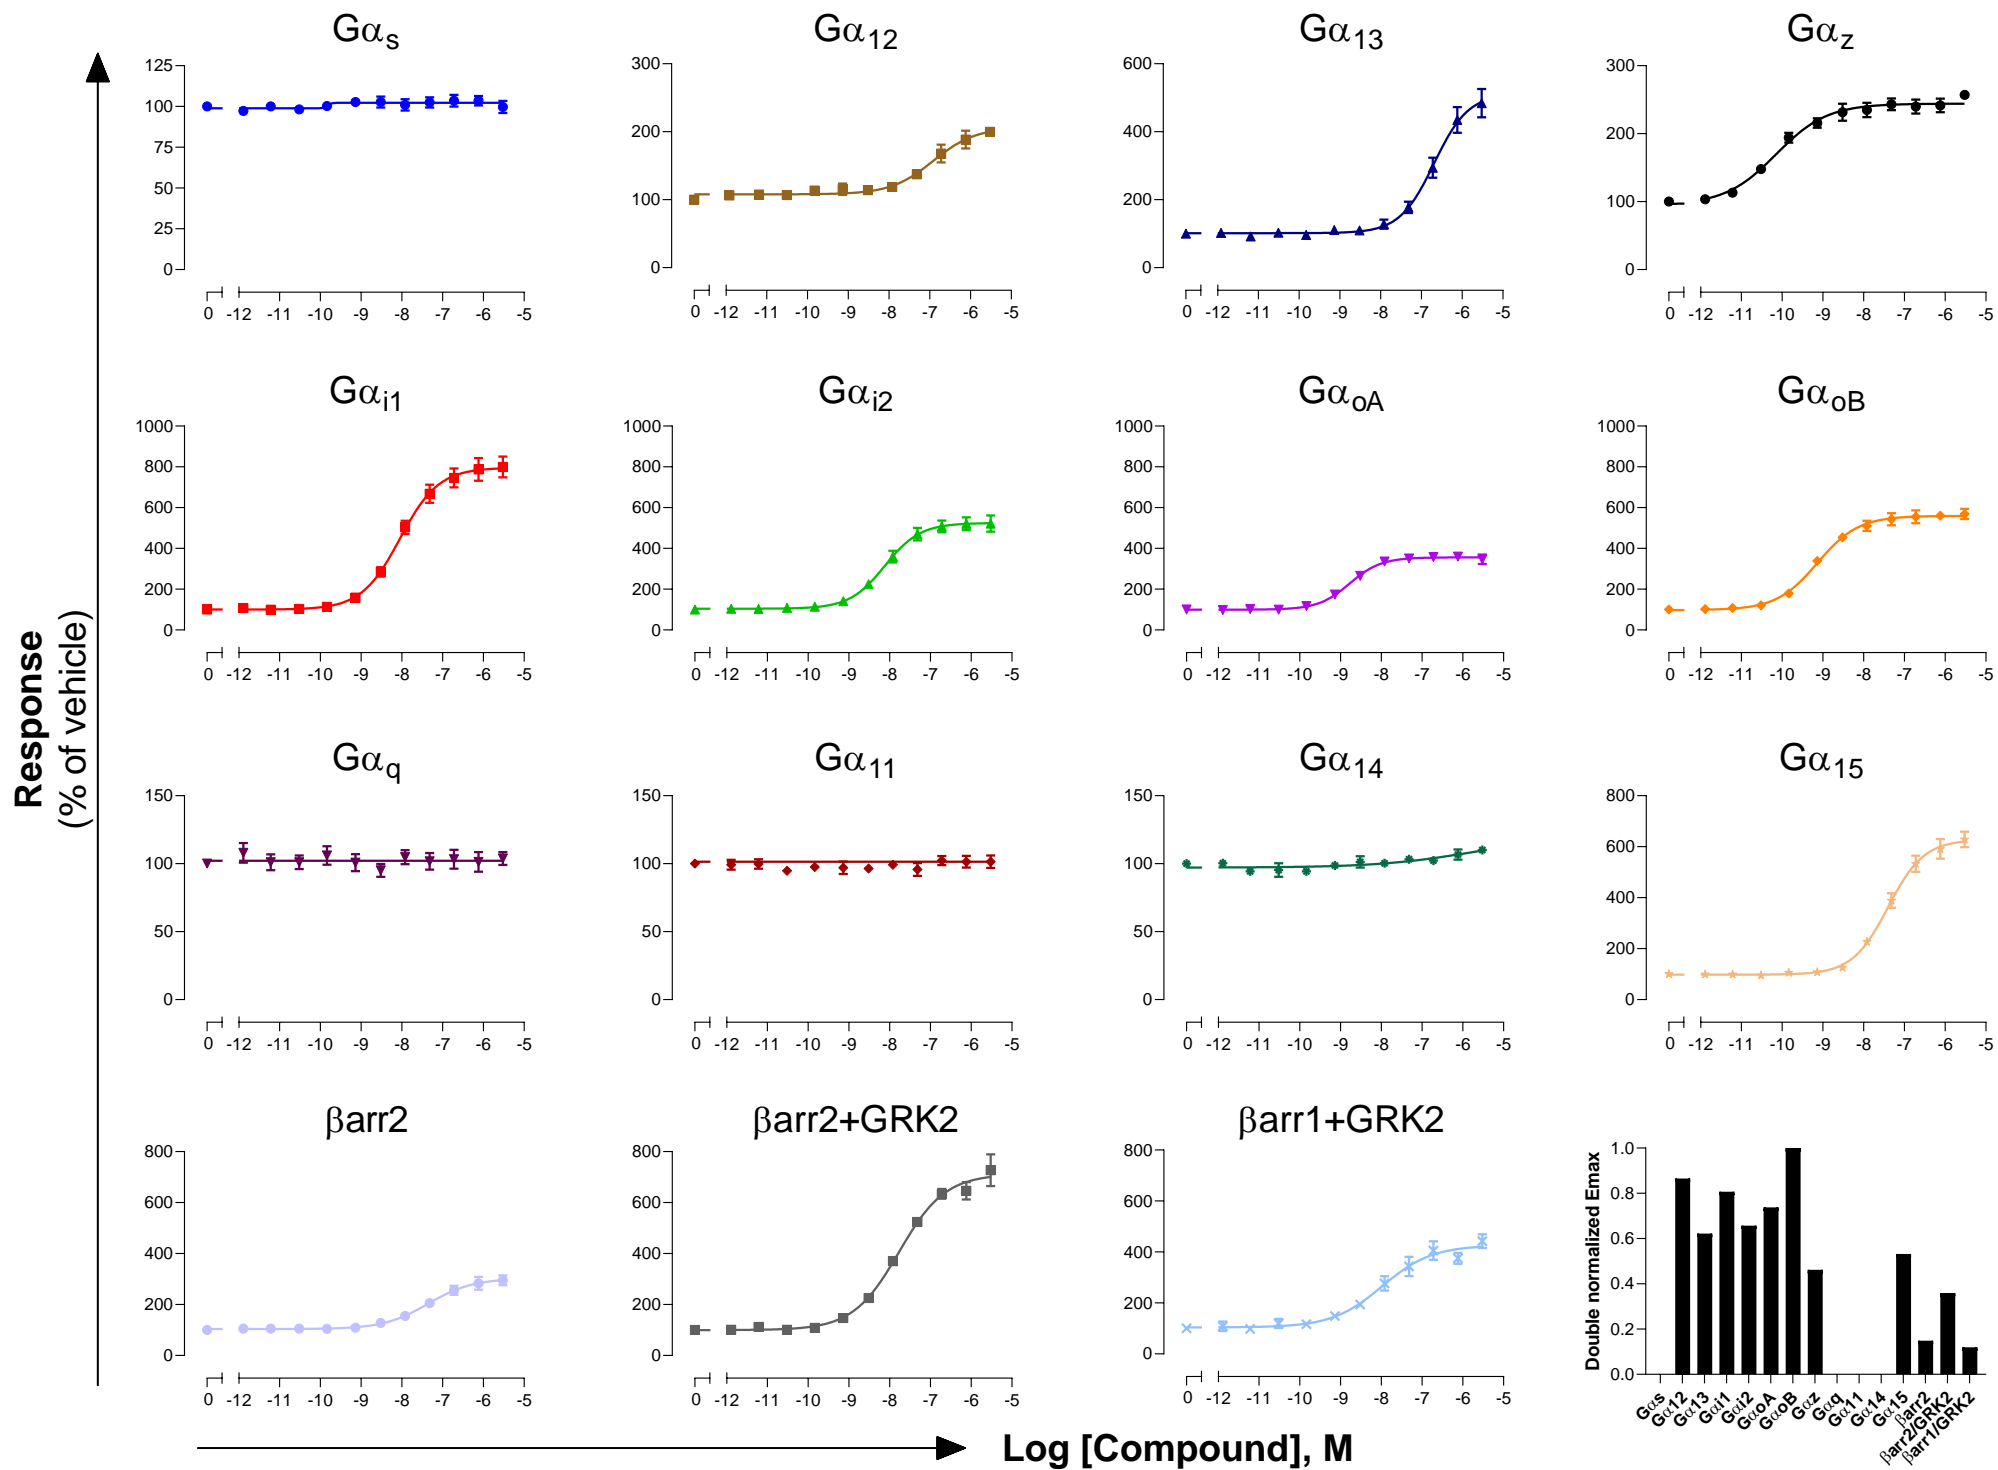

**GPCR: NPFF2**  
**Ligand: NPFF**

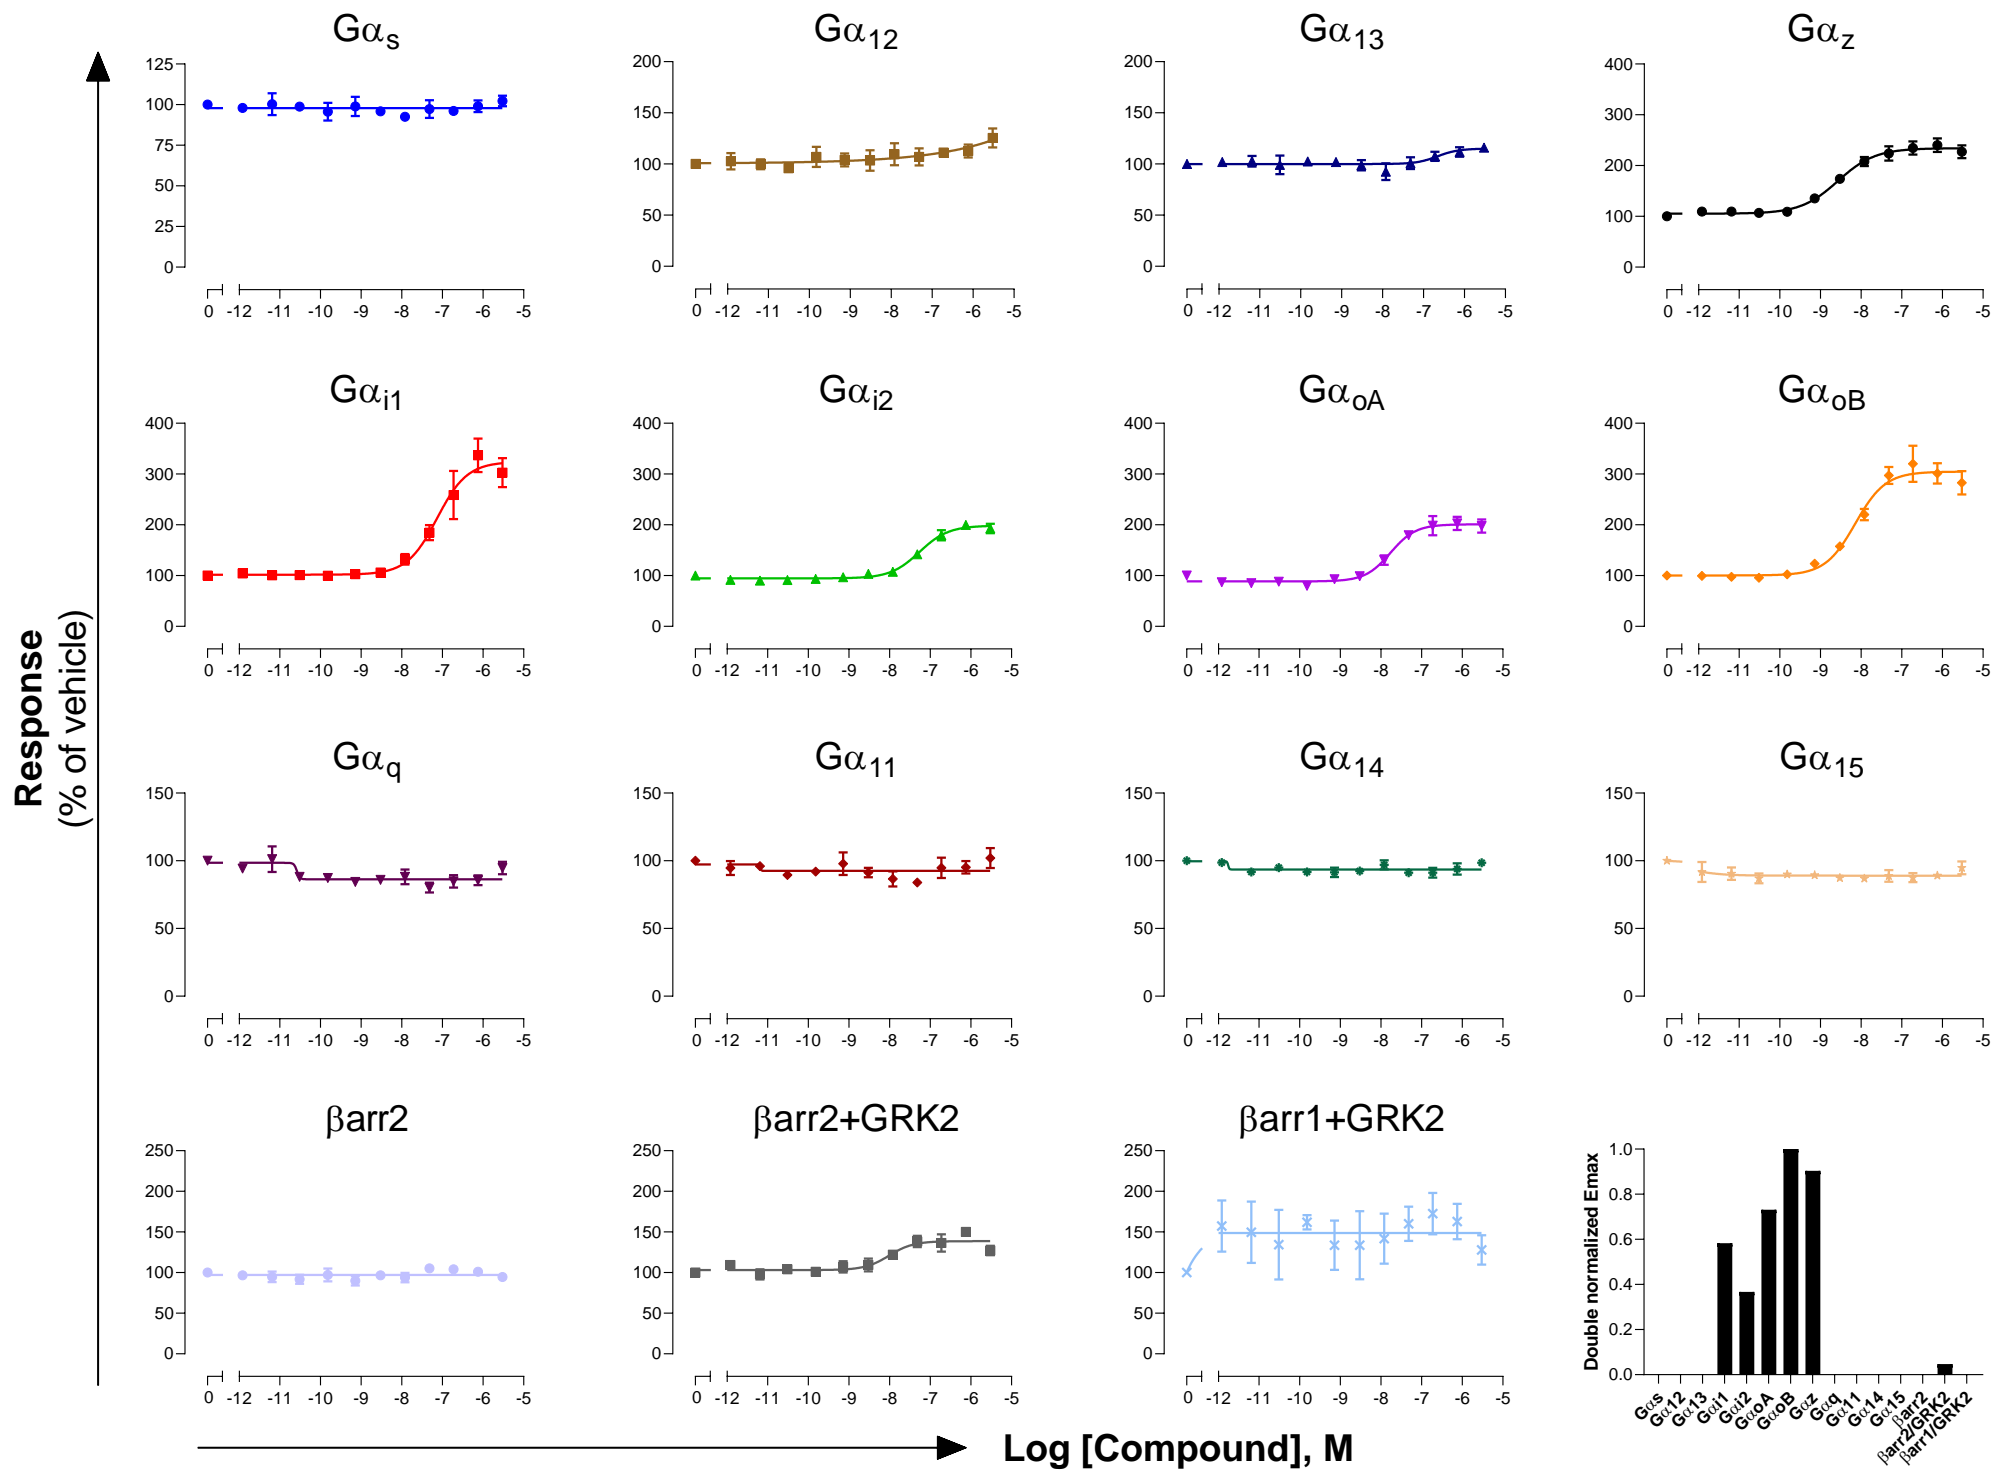

# GPCR: OT

## Ligand: Oxytocin

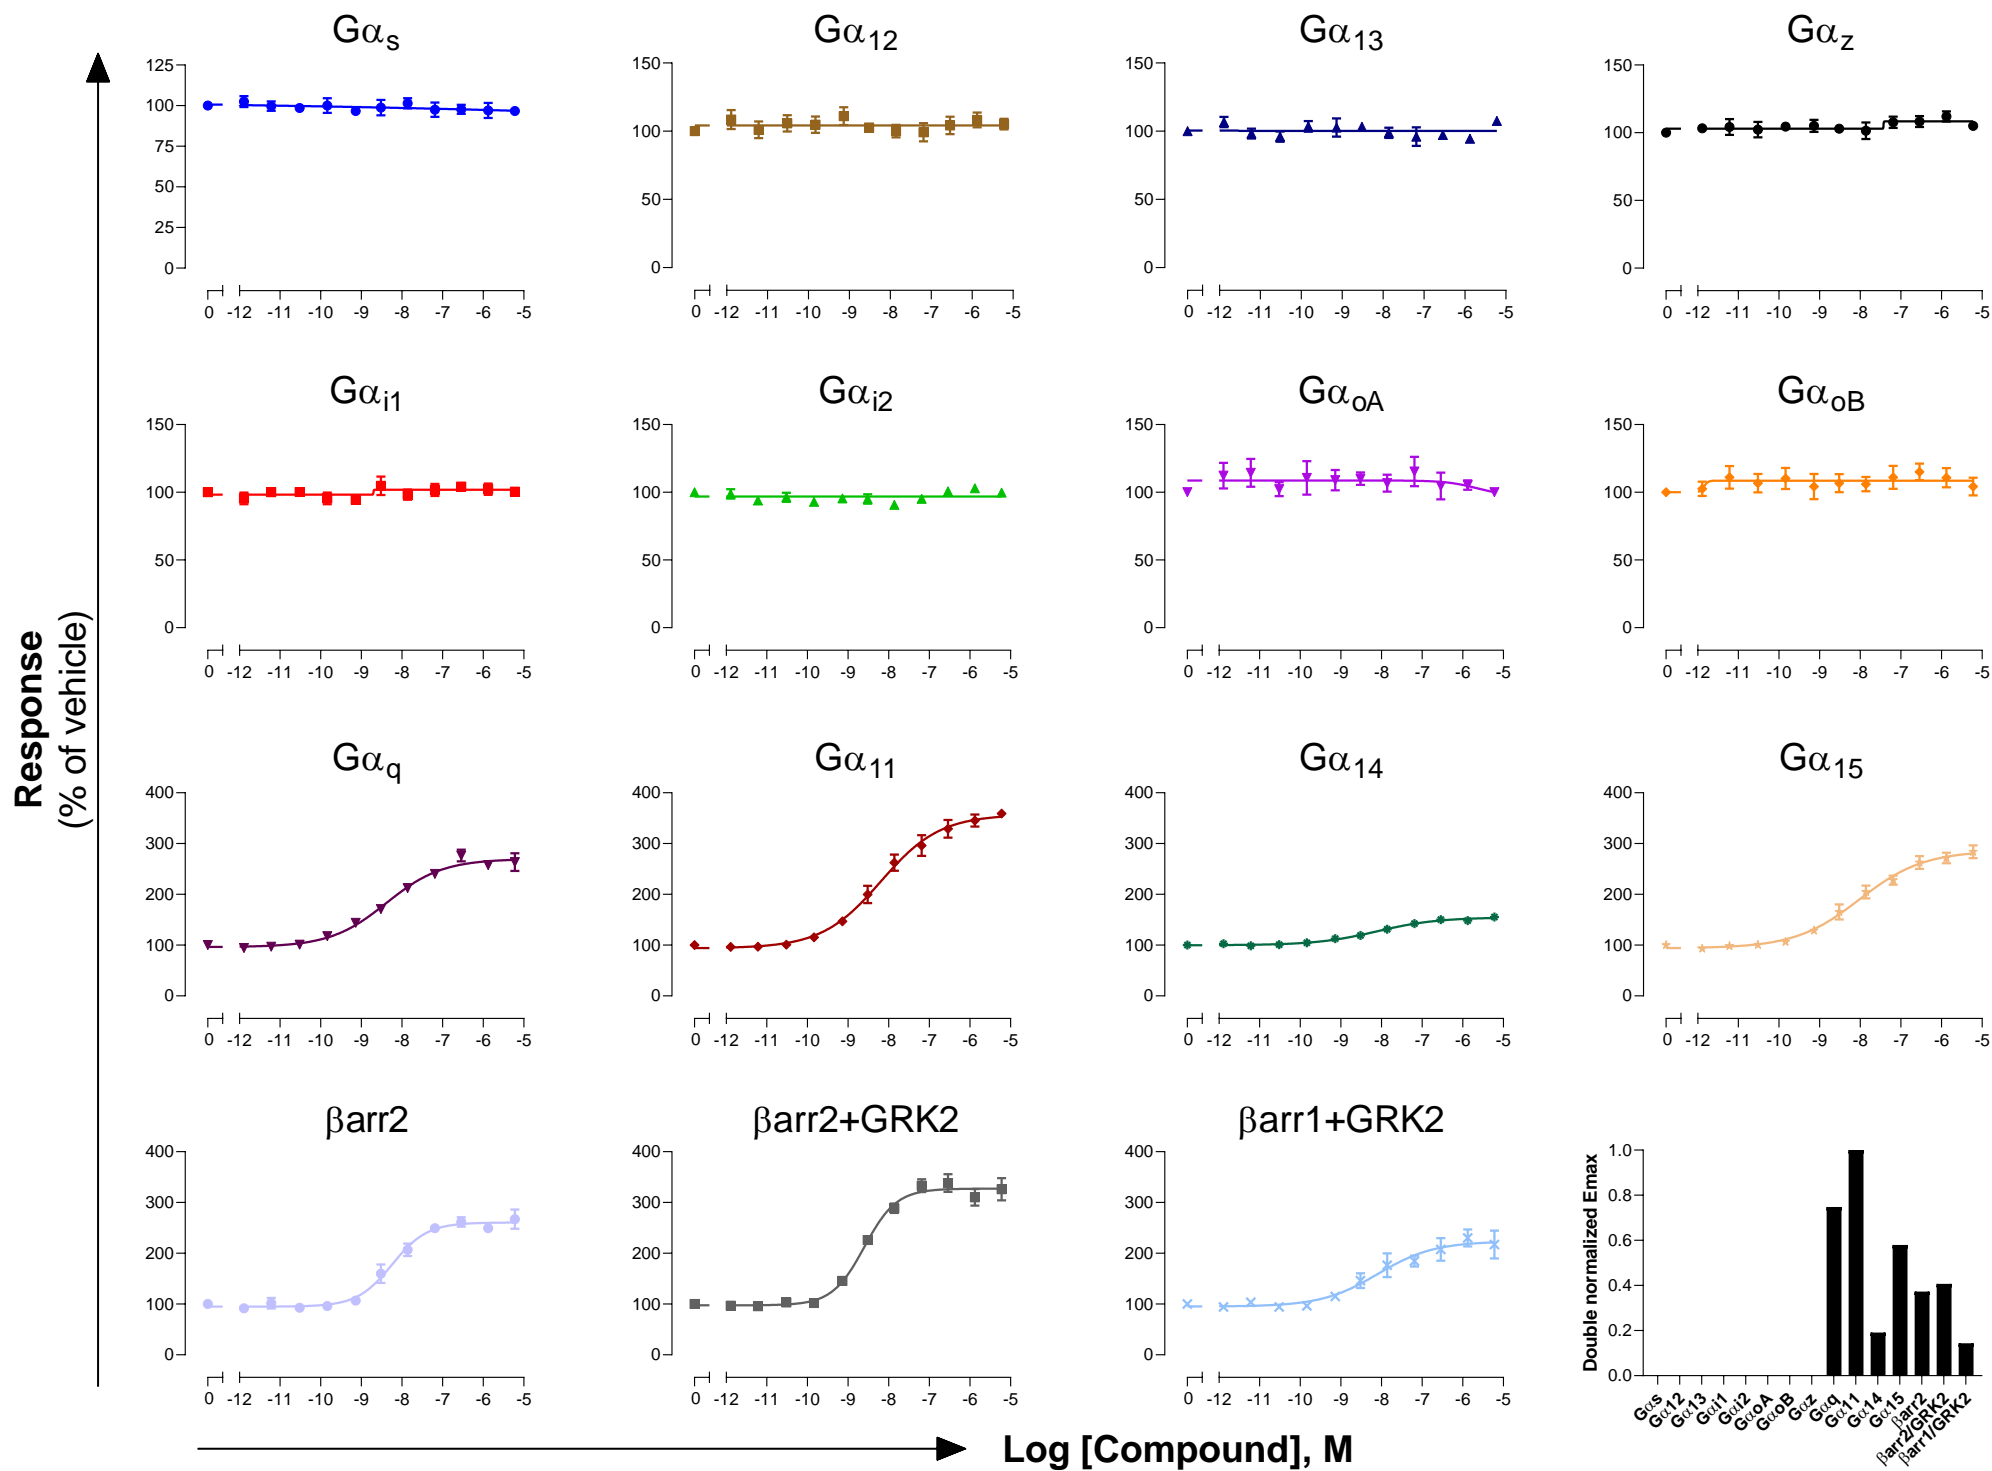



**GPCR: OX<sub>2</sub>**  
**Ligand: Orexin-A**

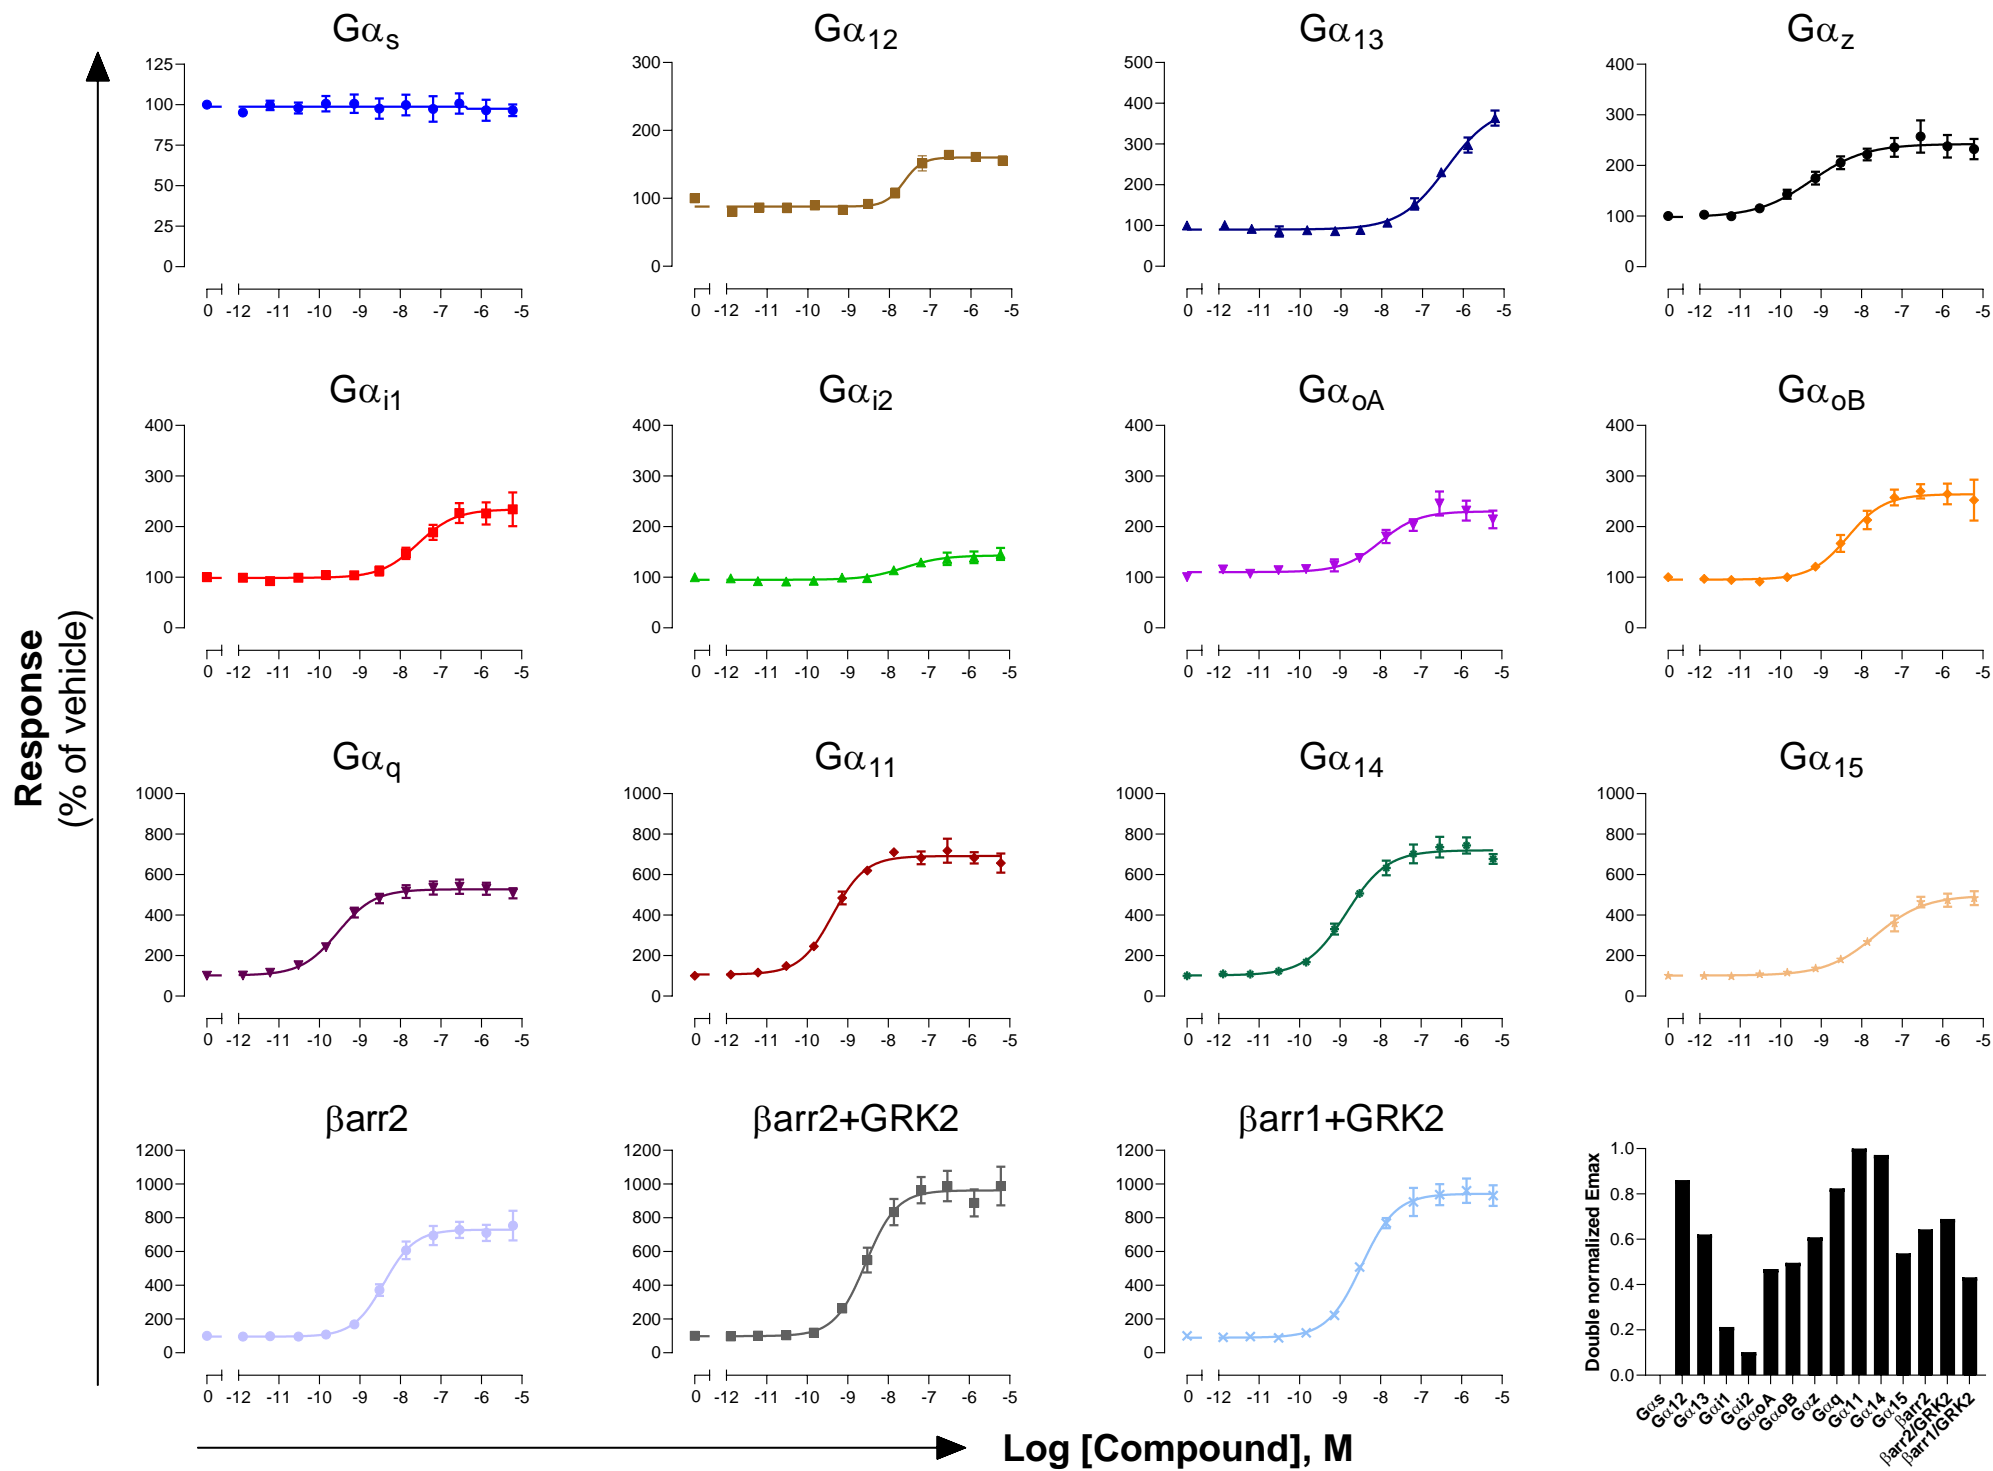

**GPCR: P2Y<sub>2</sub>**  
**Ligand: UTP**

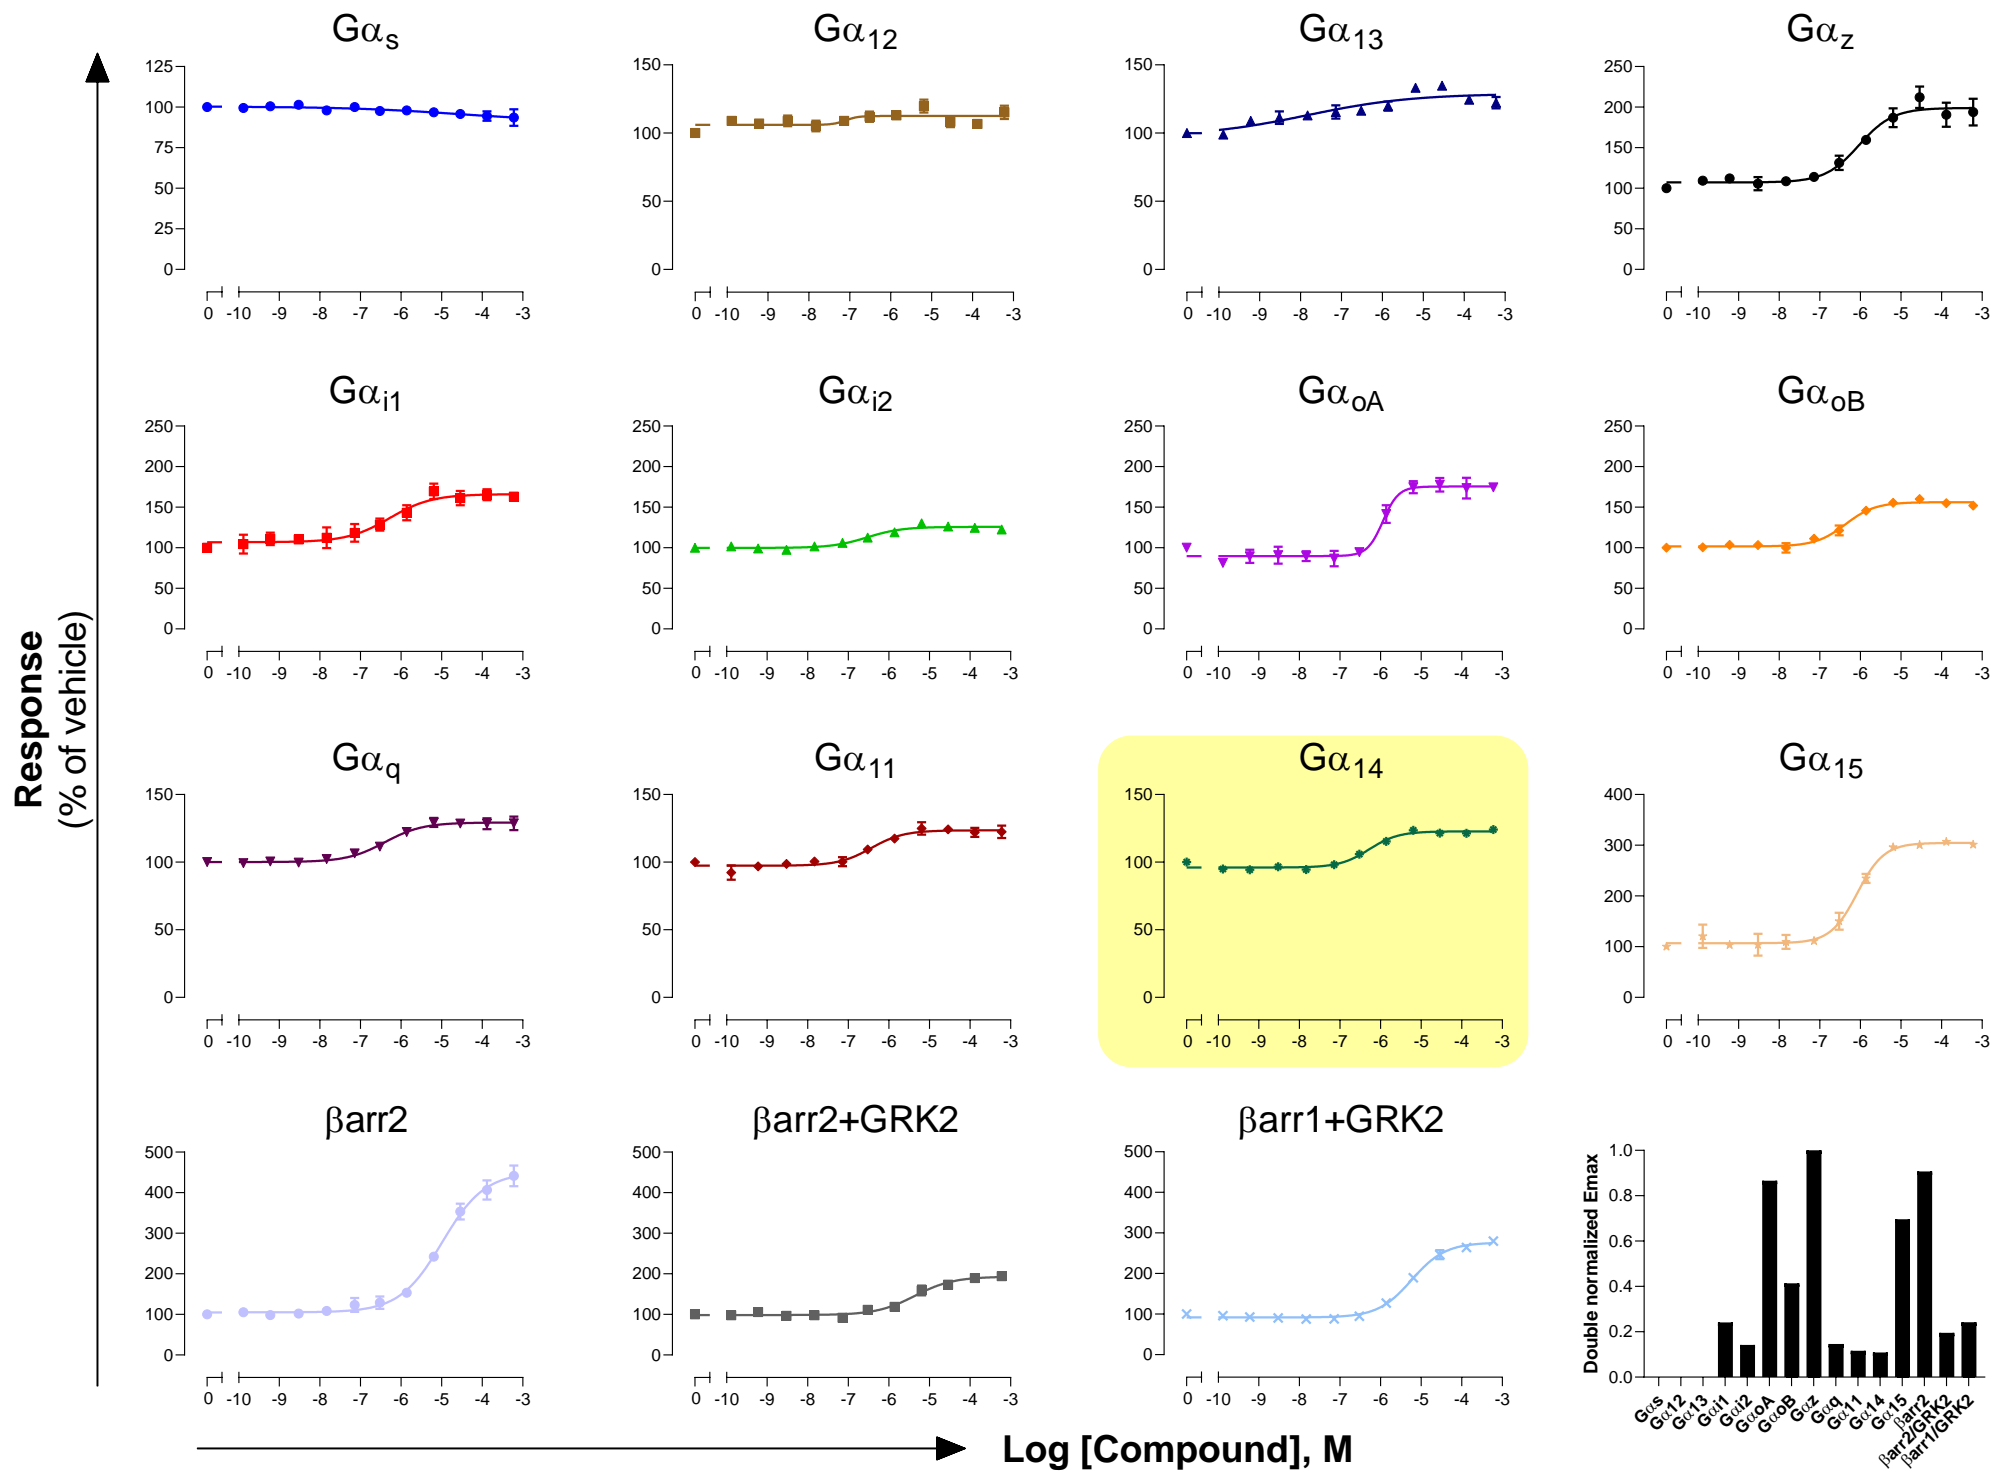

**GPCR: PAR1**  
**Ligand: TFLLR-NH<sub>2</sub>**

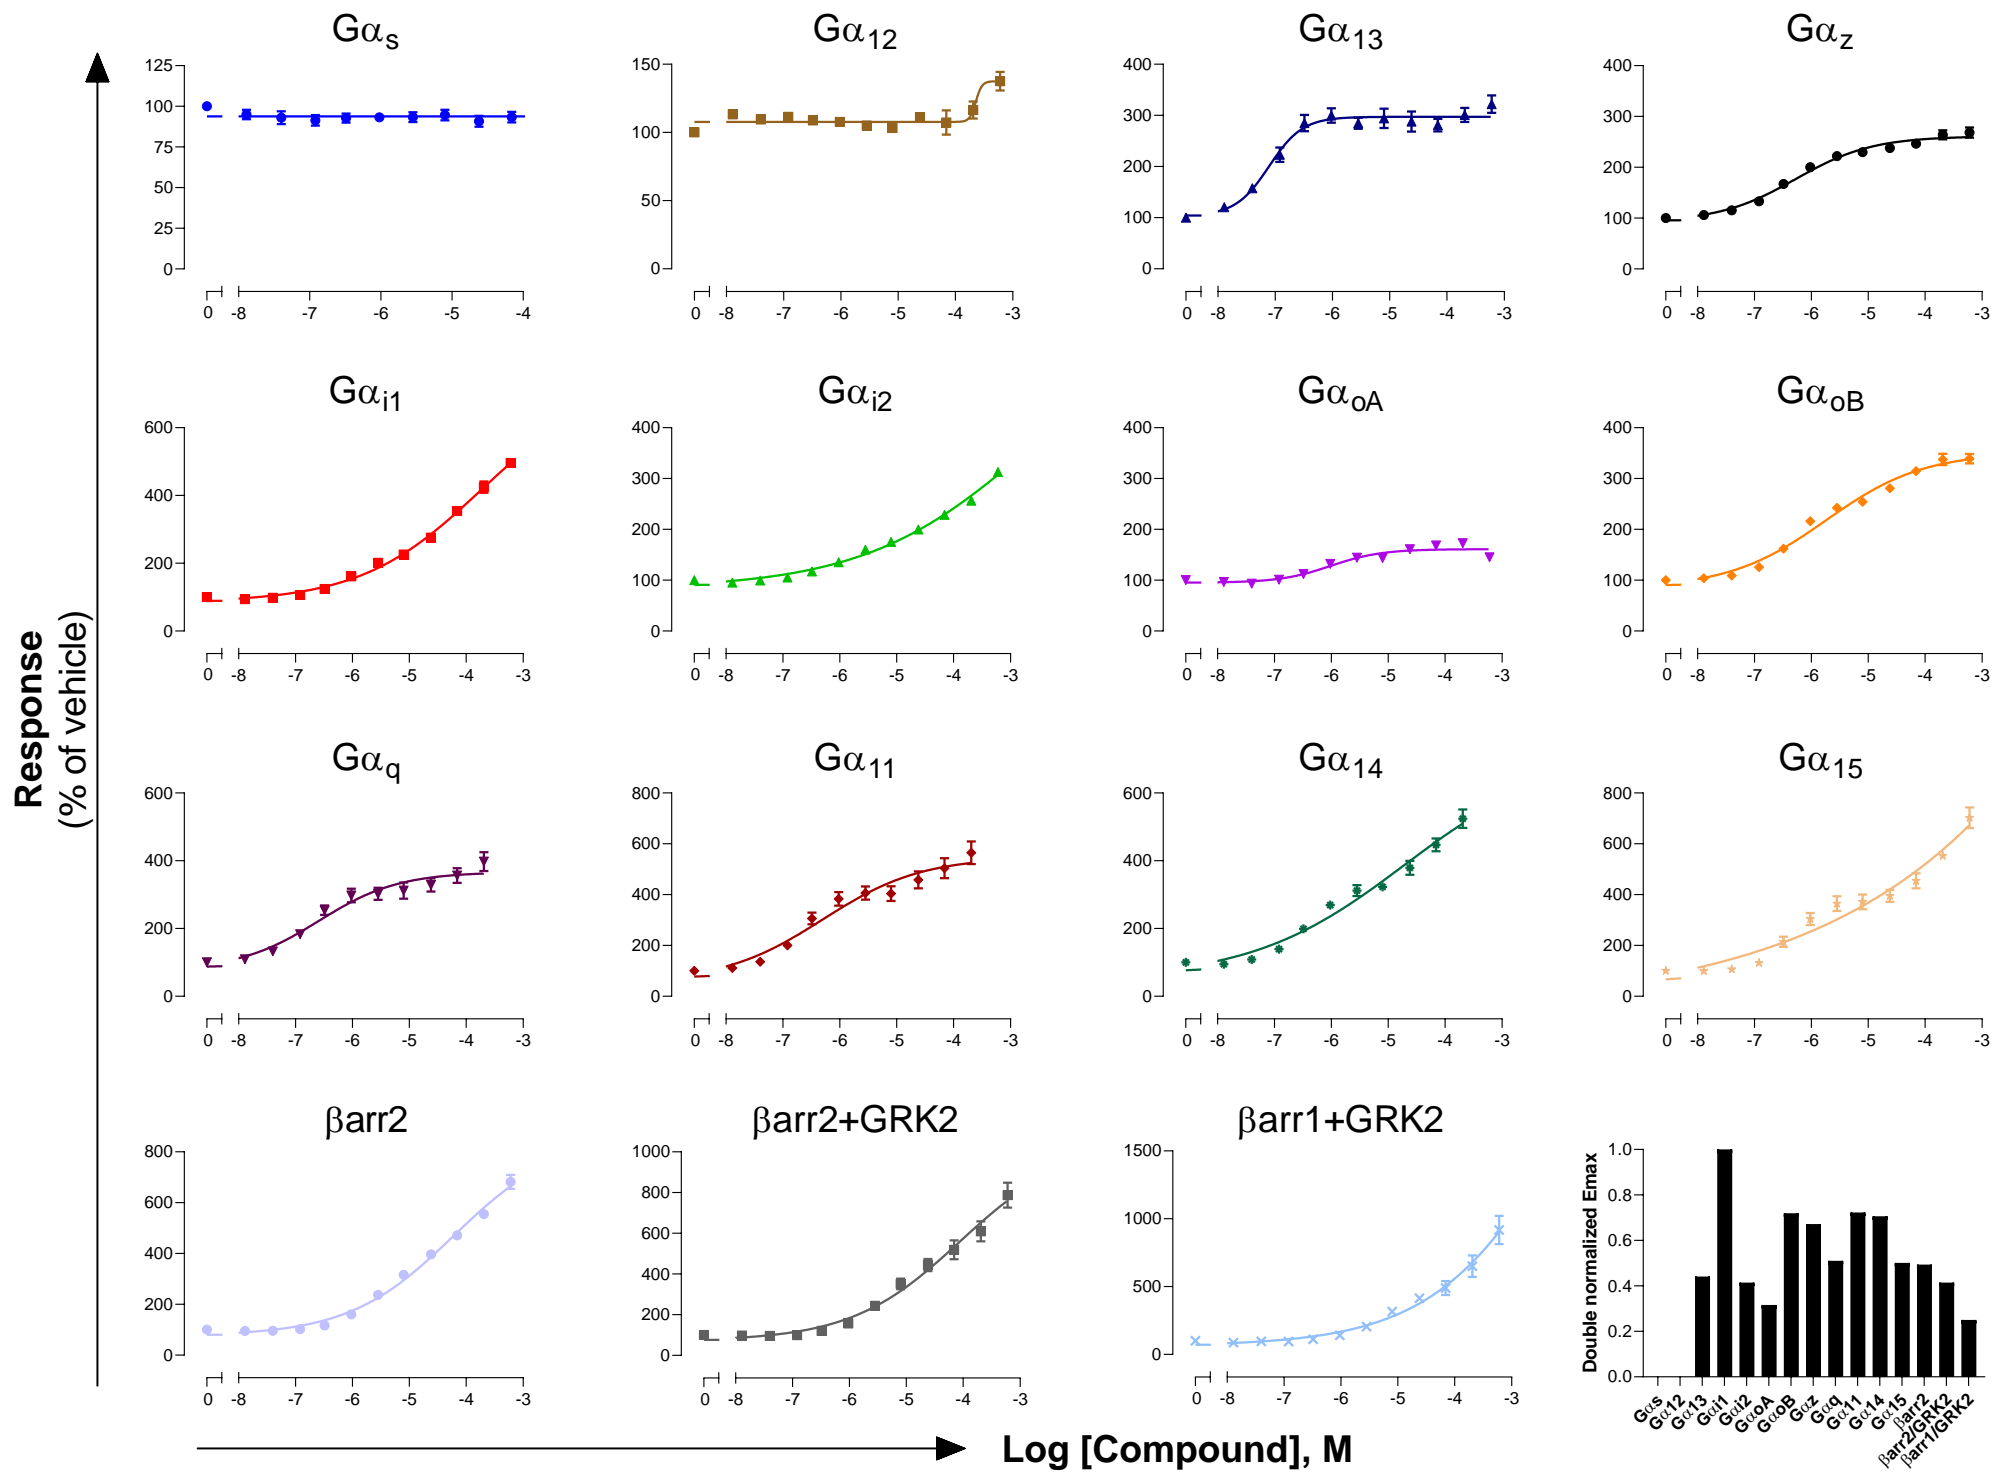

**GPCR: PAR2**  
**Ligand: SLIGKV-NH<sub>2</sub>**

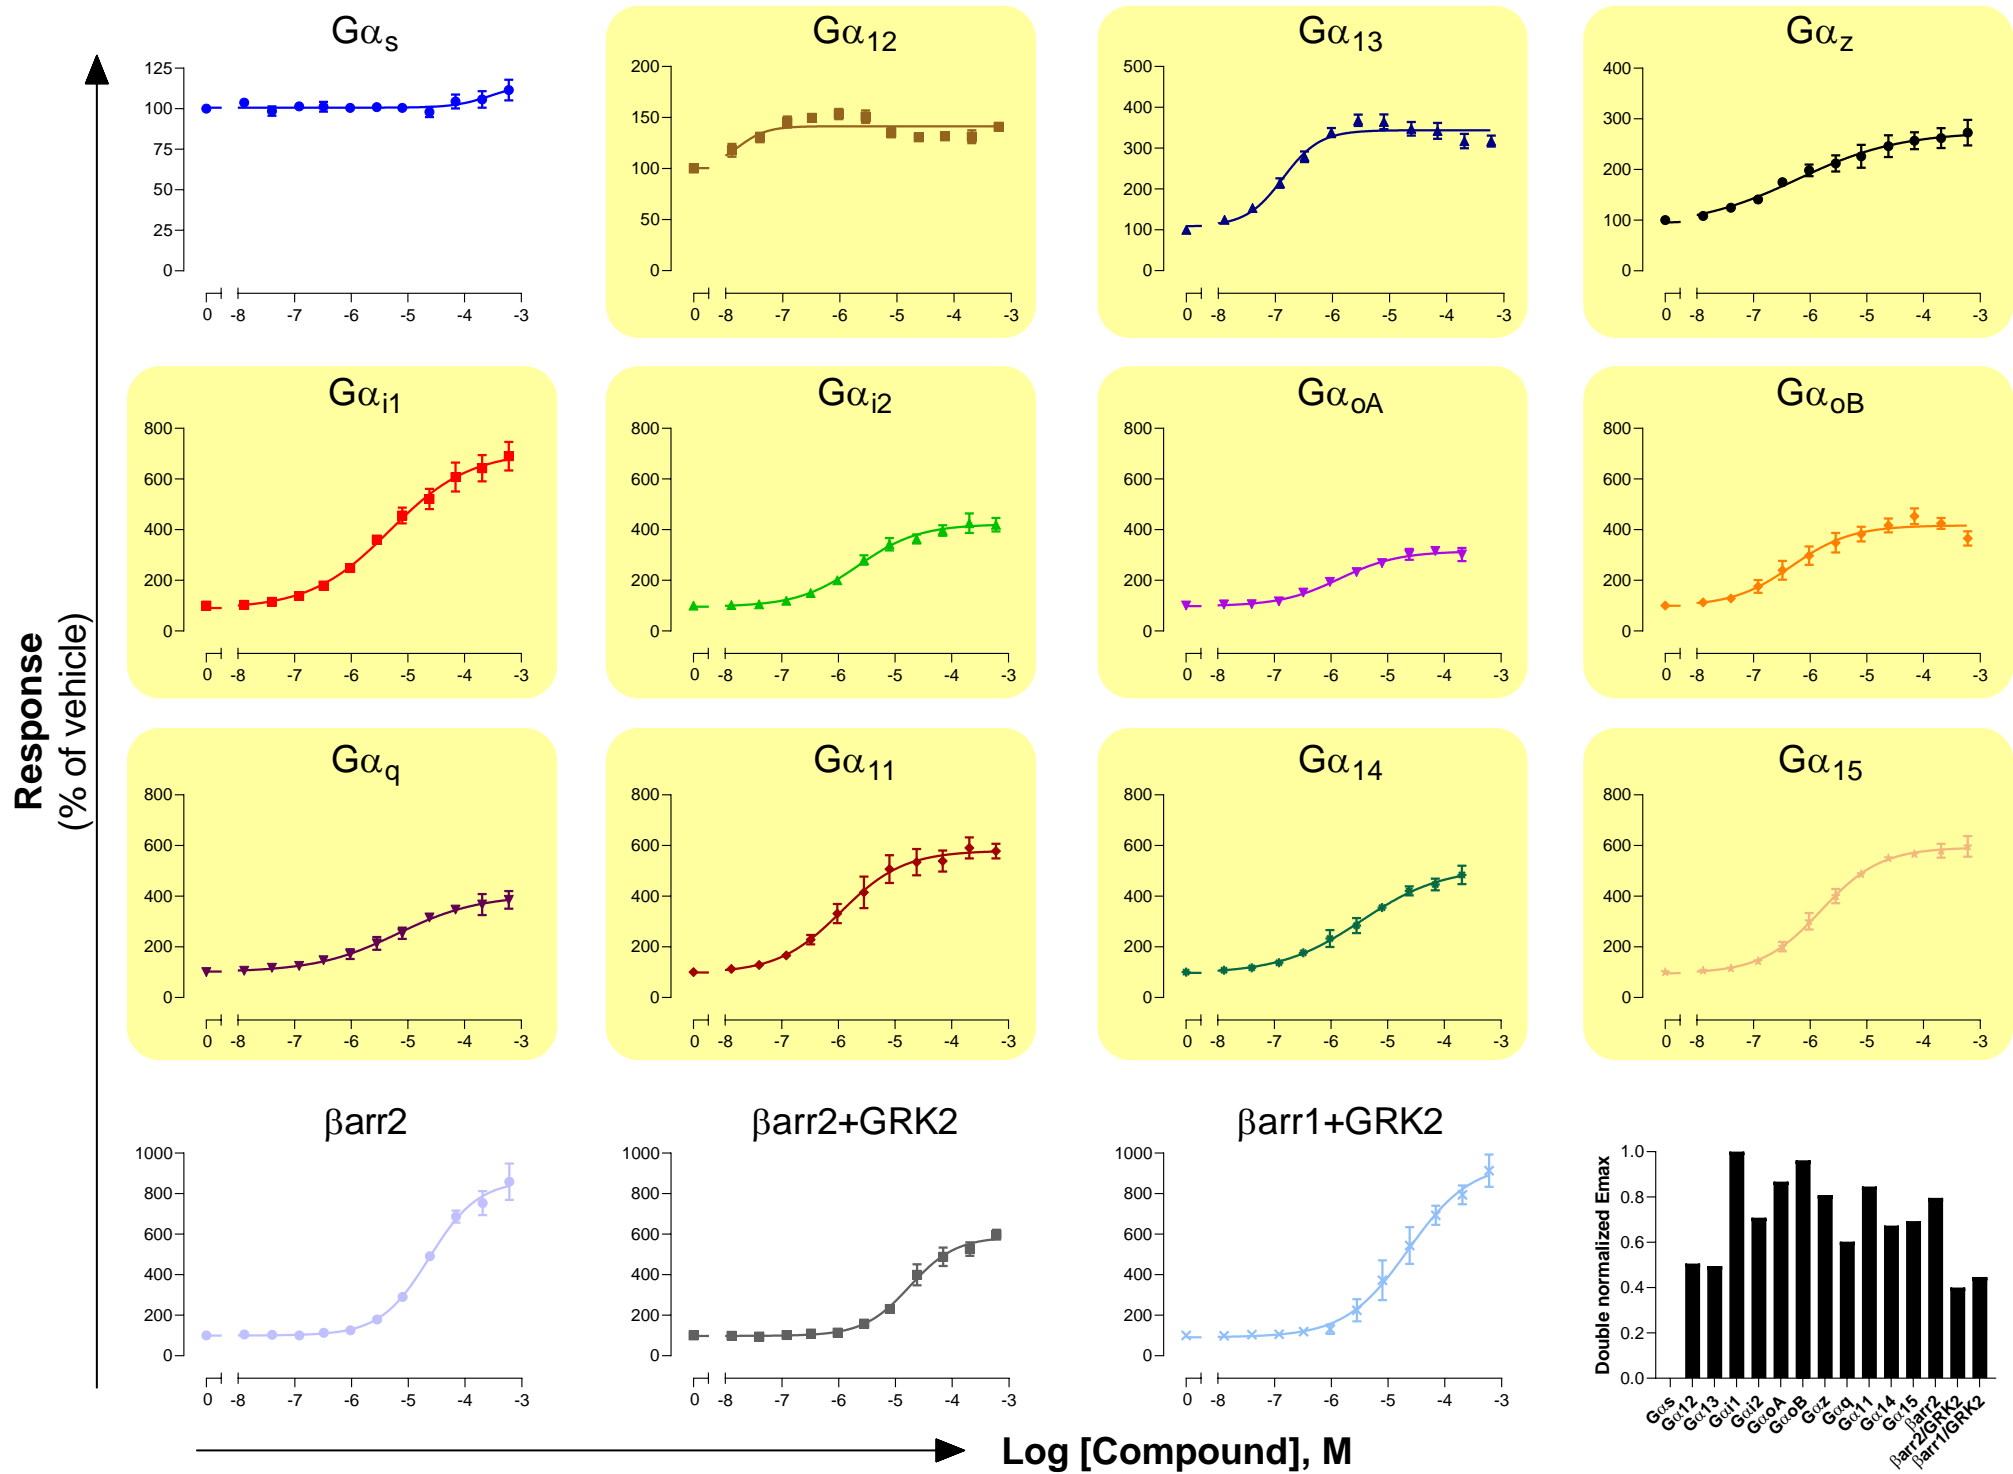

**GPCR: PTH1**  
**Ligand: PTH (1-34)**

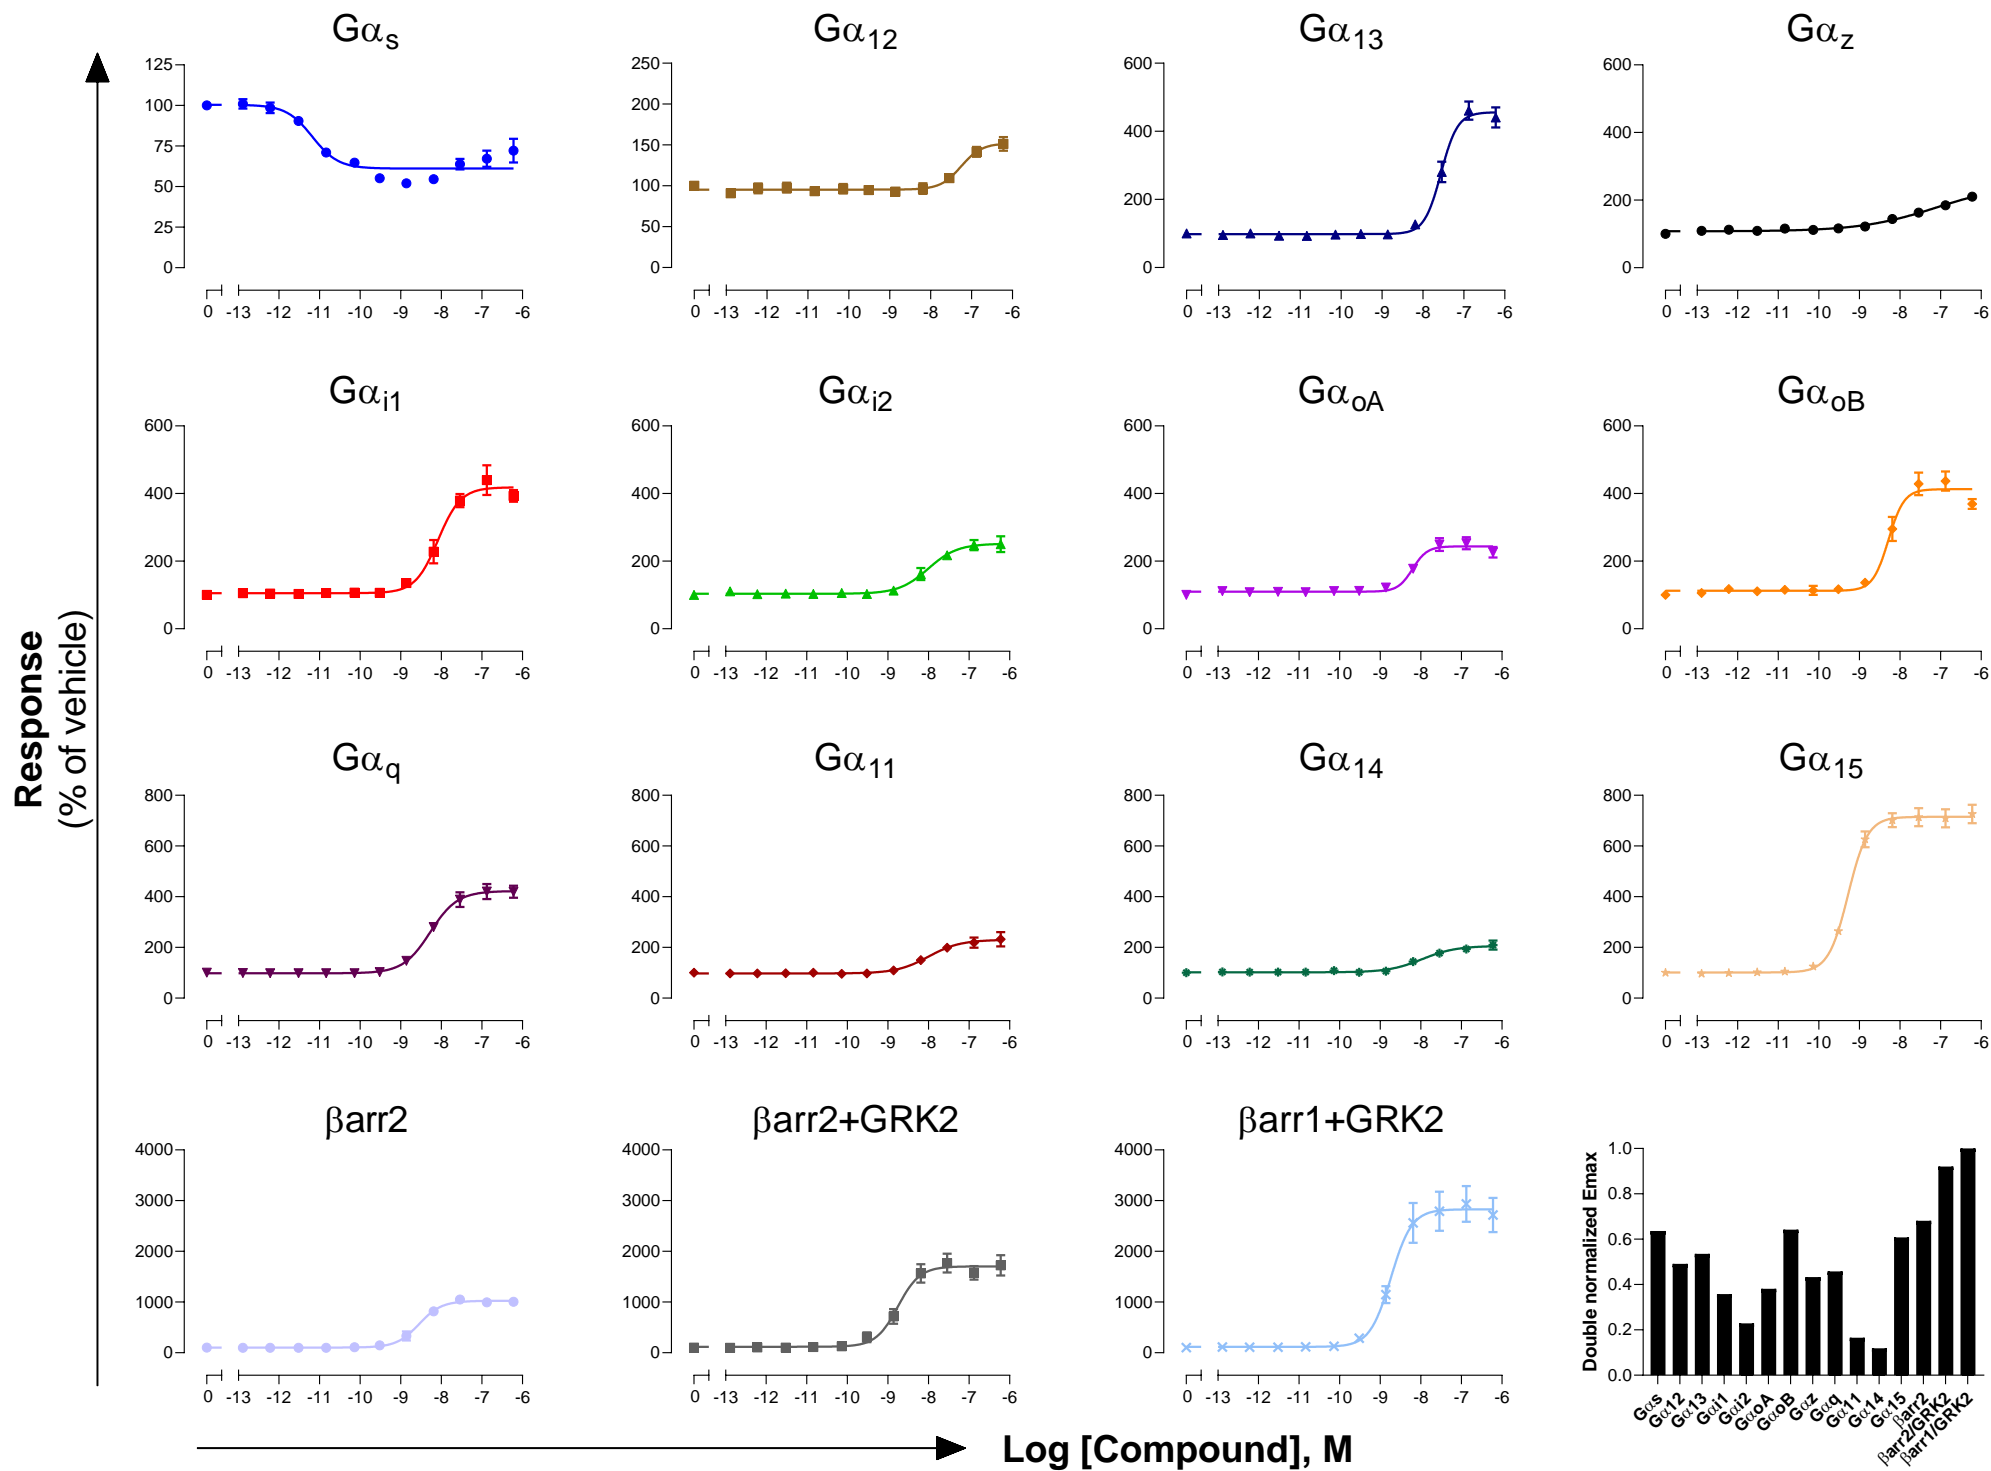

# GPCR: S1P<sub>1</sub>

Ligand: Sphingosine 1-phosphate

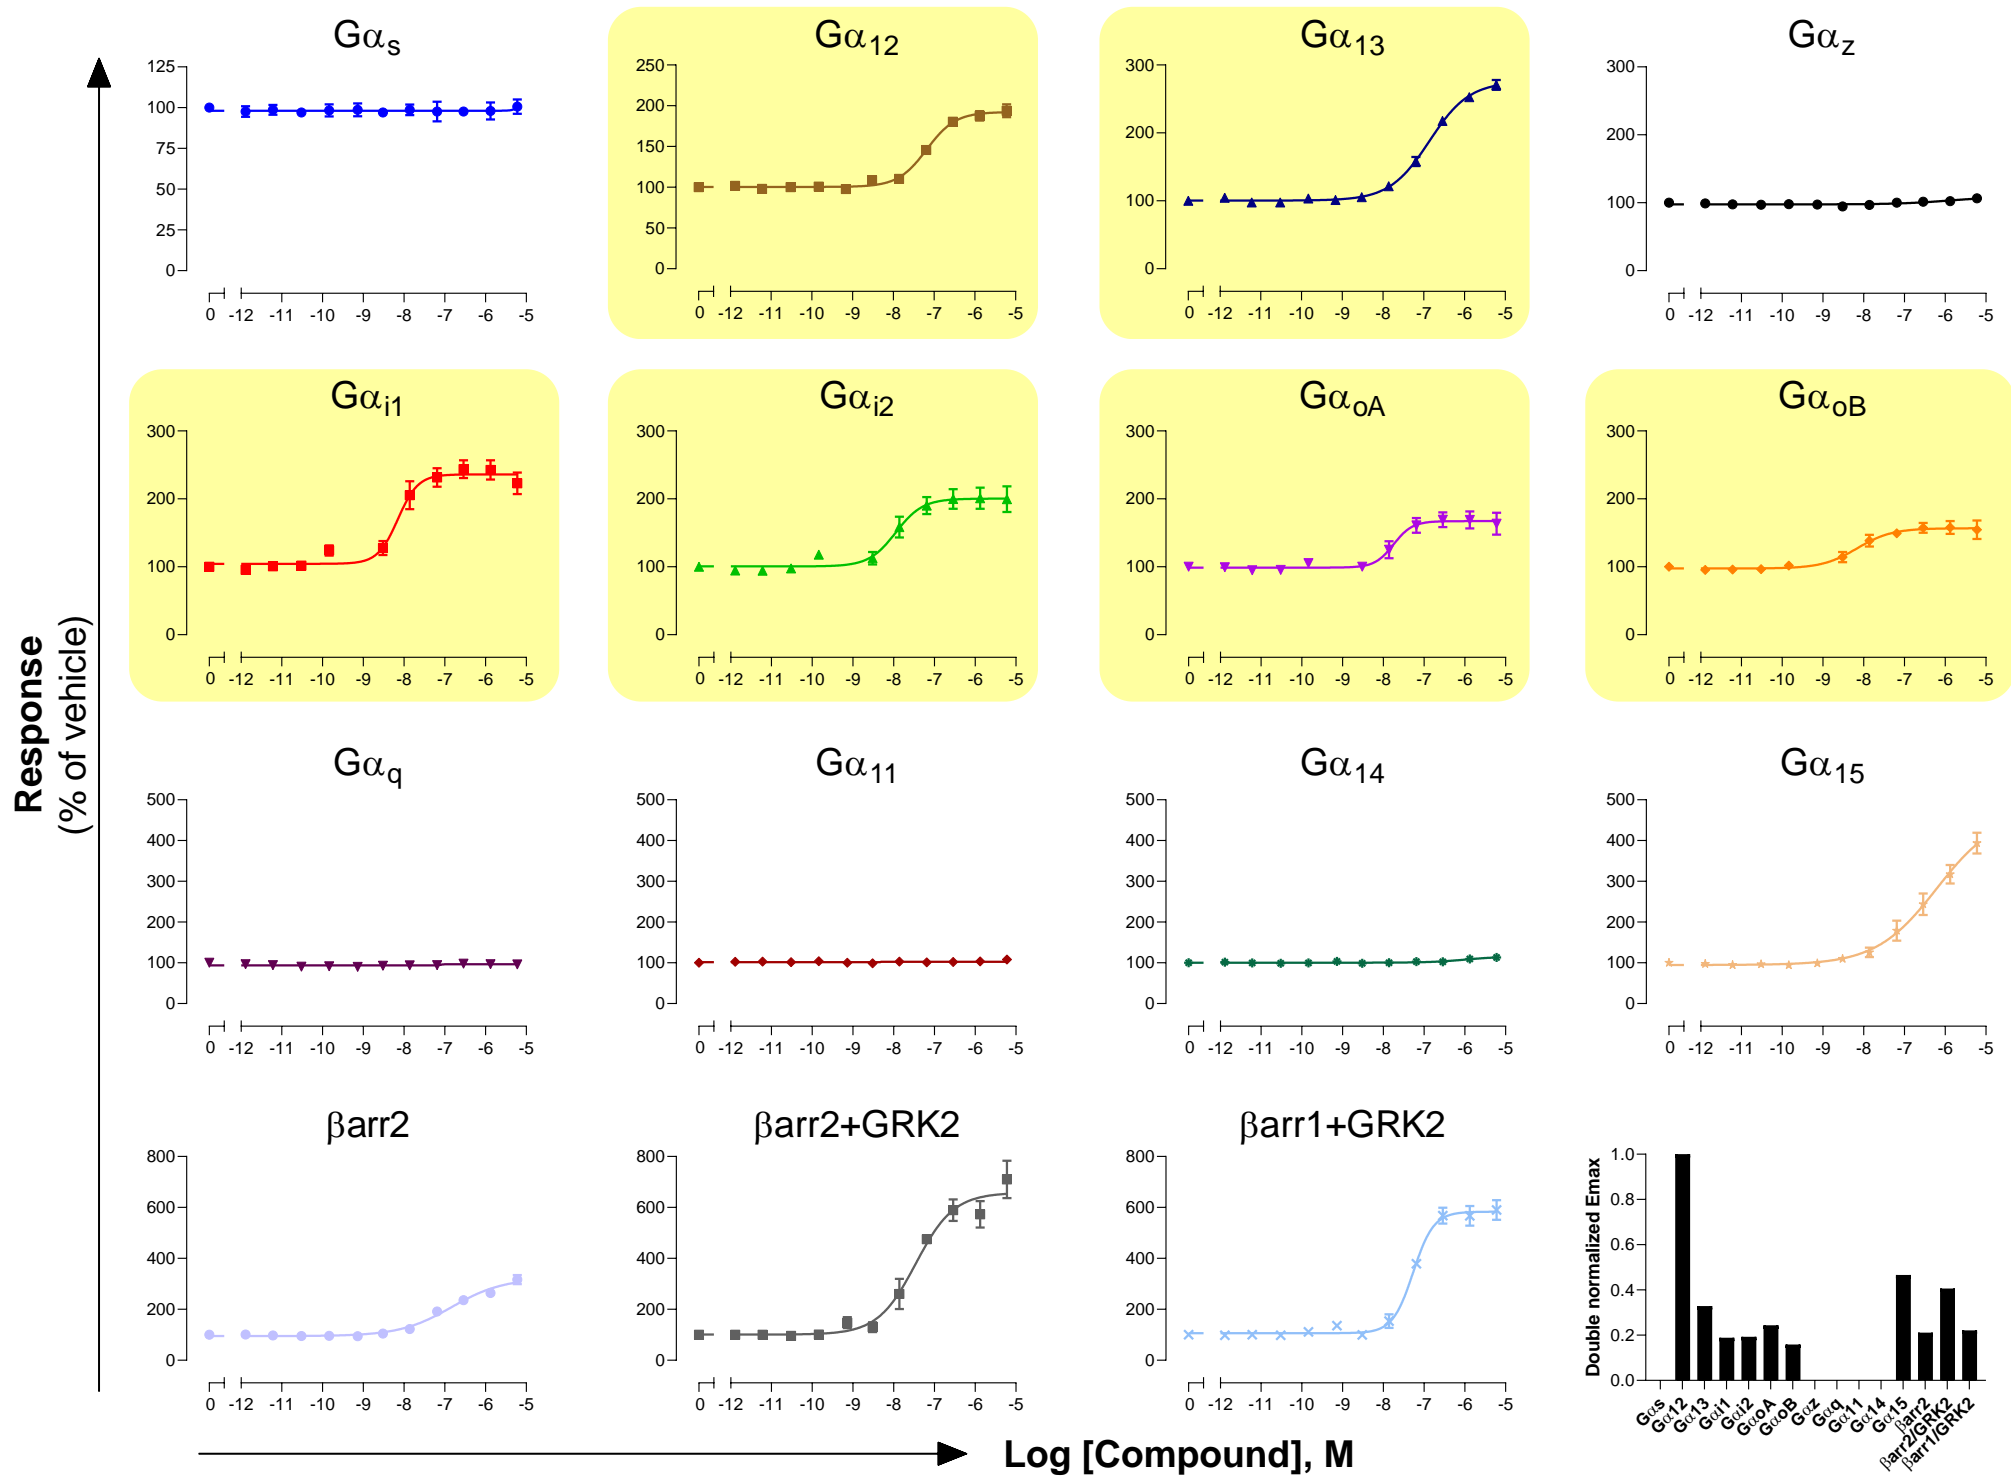

# GPCR: SST<sub>2A</sub>

## Ligand: Somatostatin-14

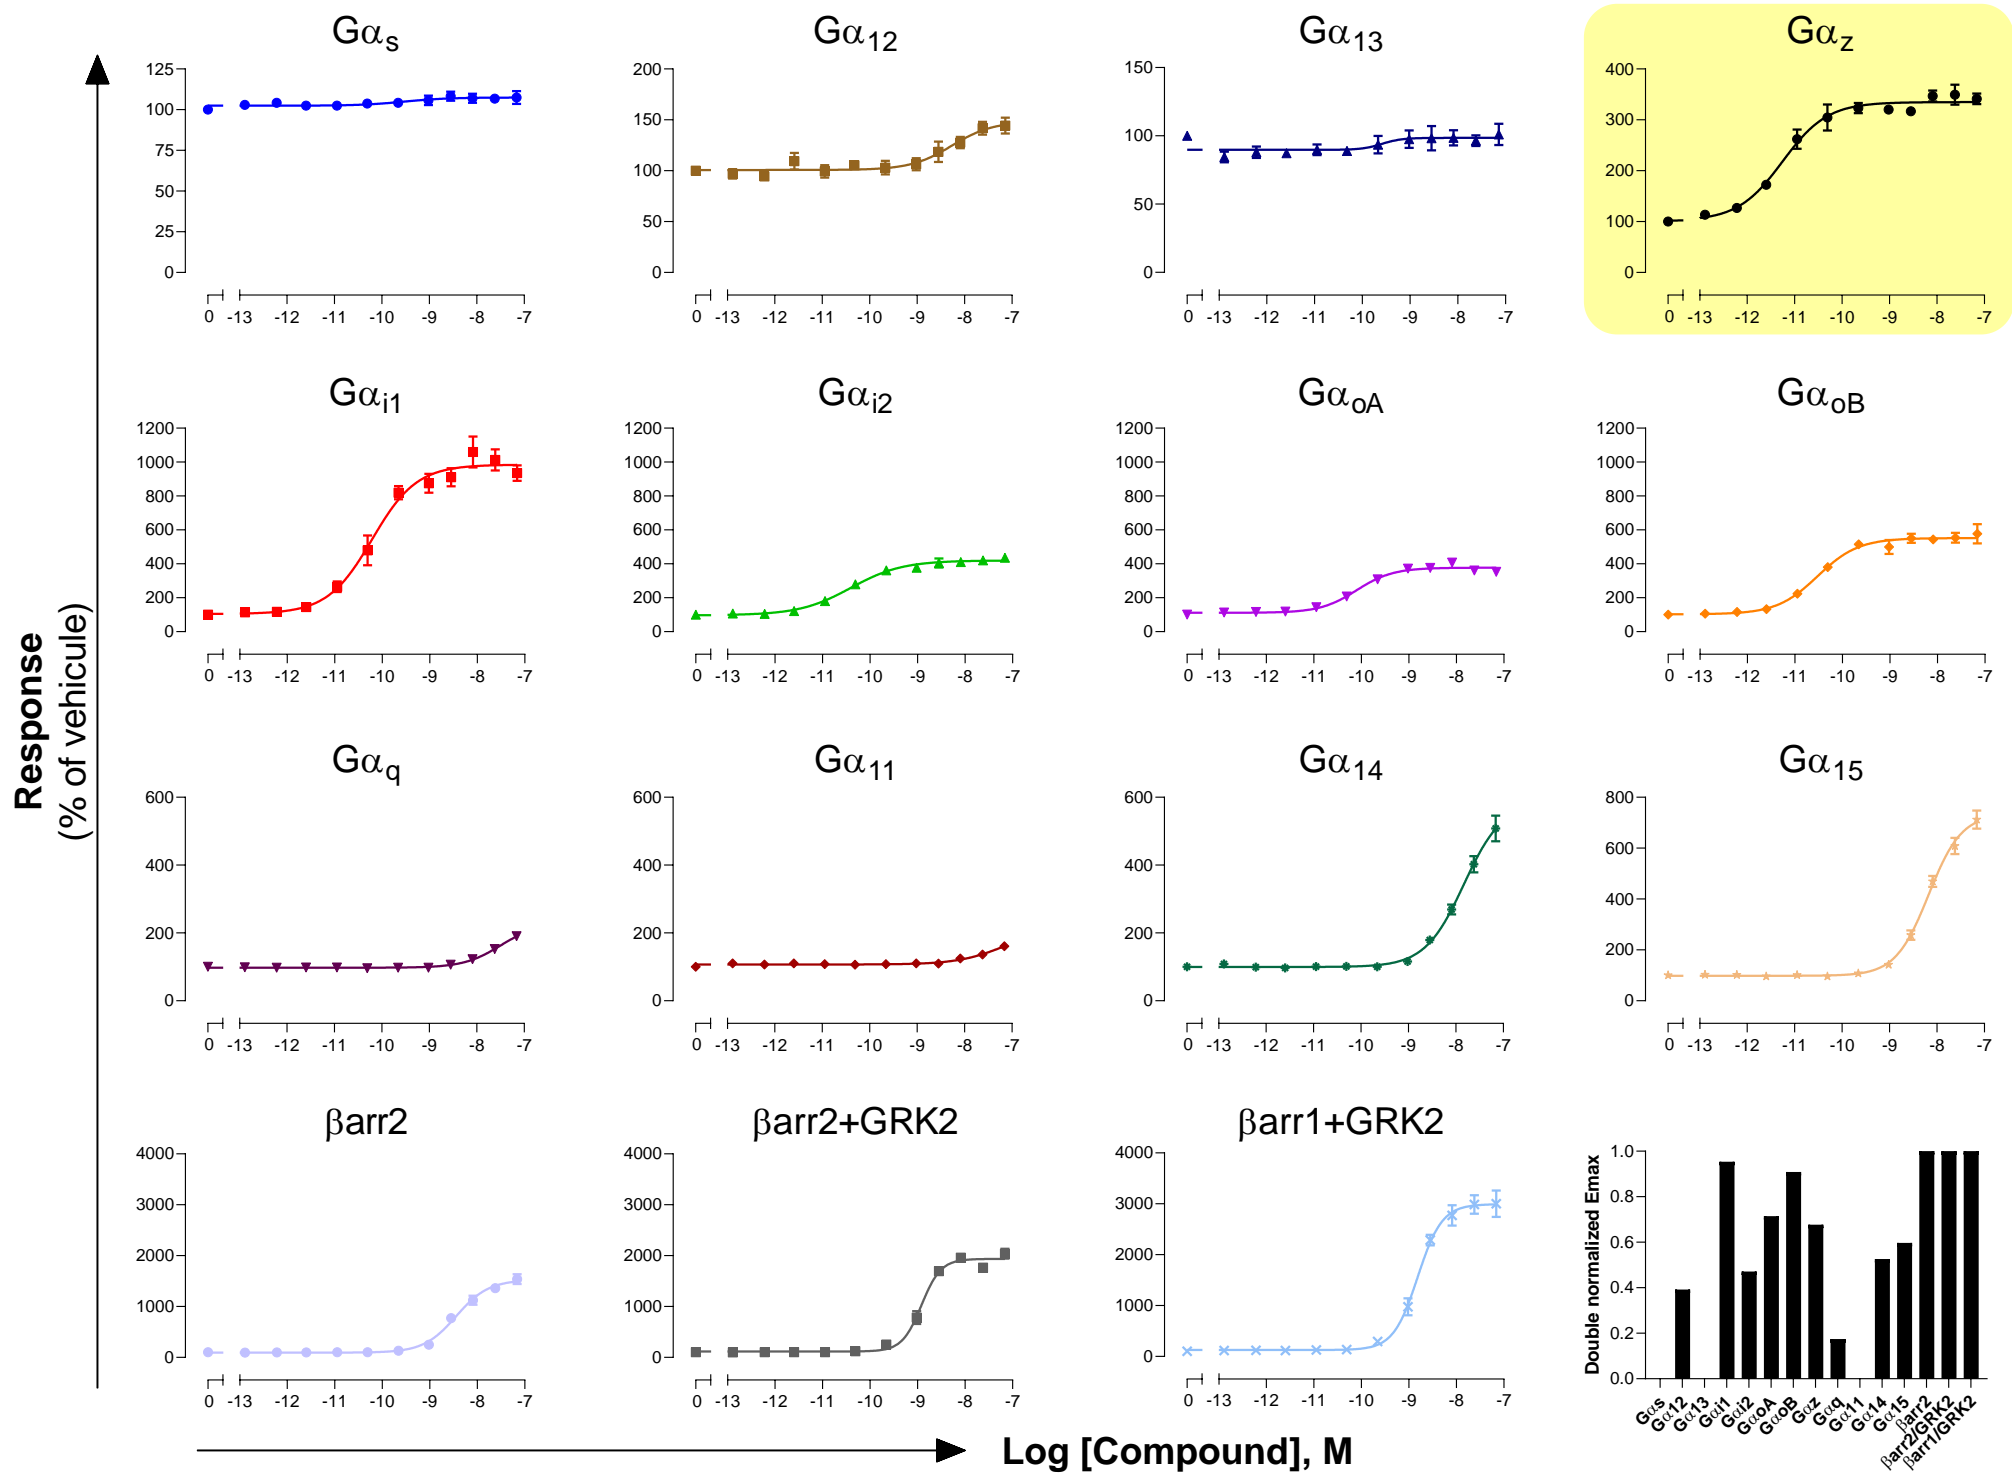

**GPCR: V<sub>1A</sub>**  
**Ligand: AVP**

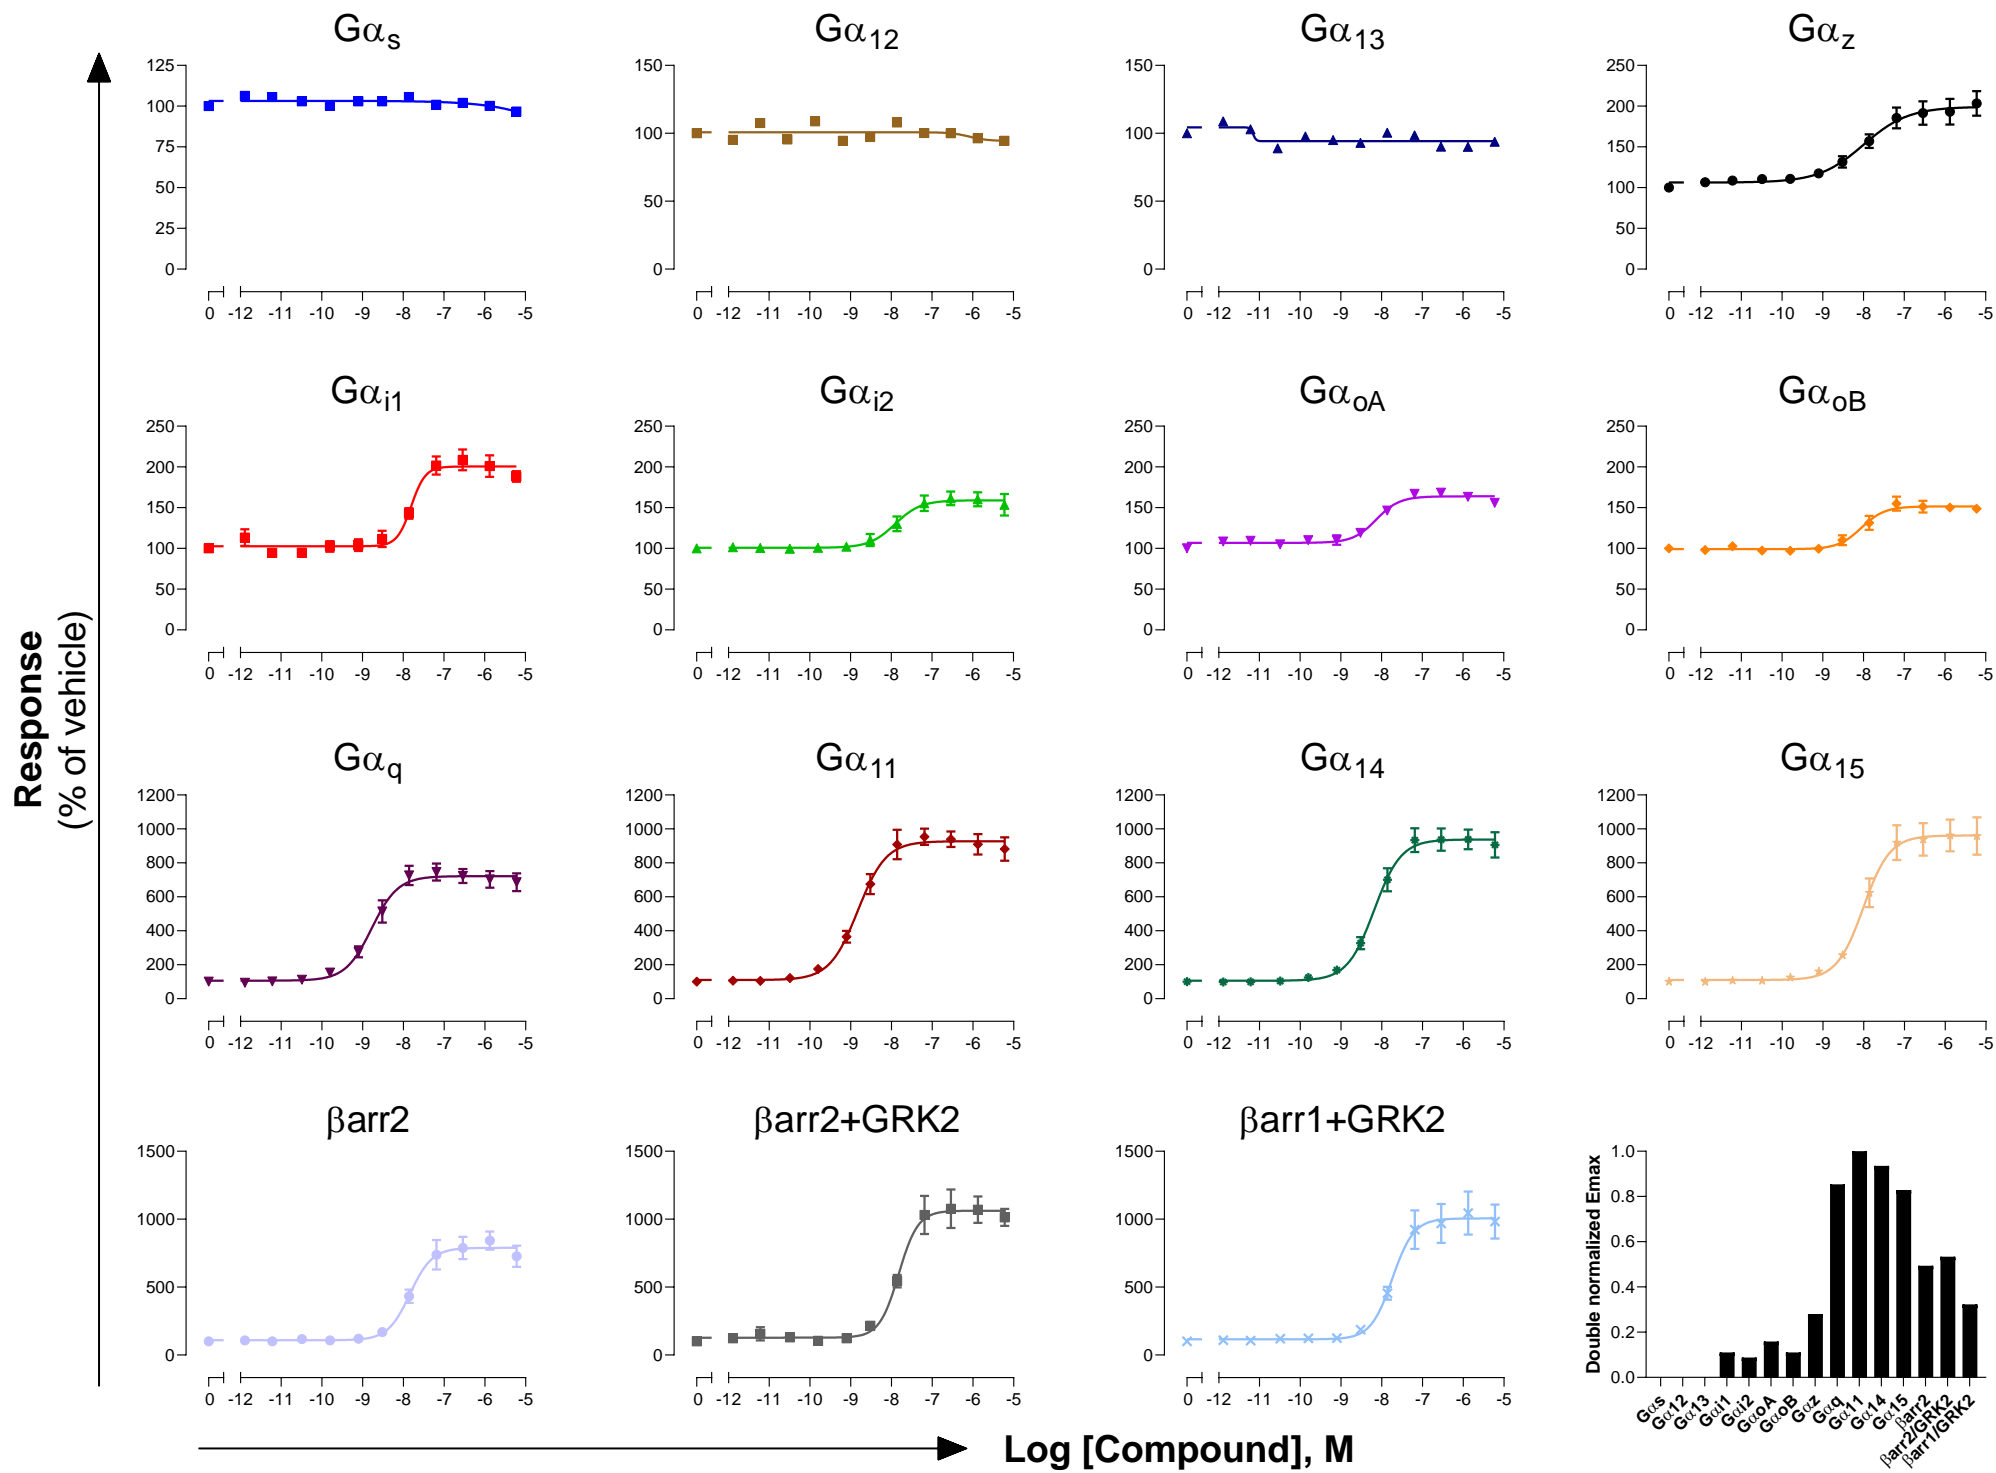



**GPCR: V<sub>2</sub>**  
**Ligand: AVP**

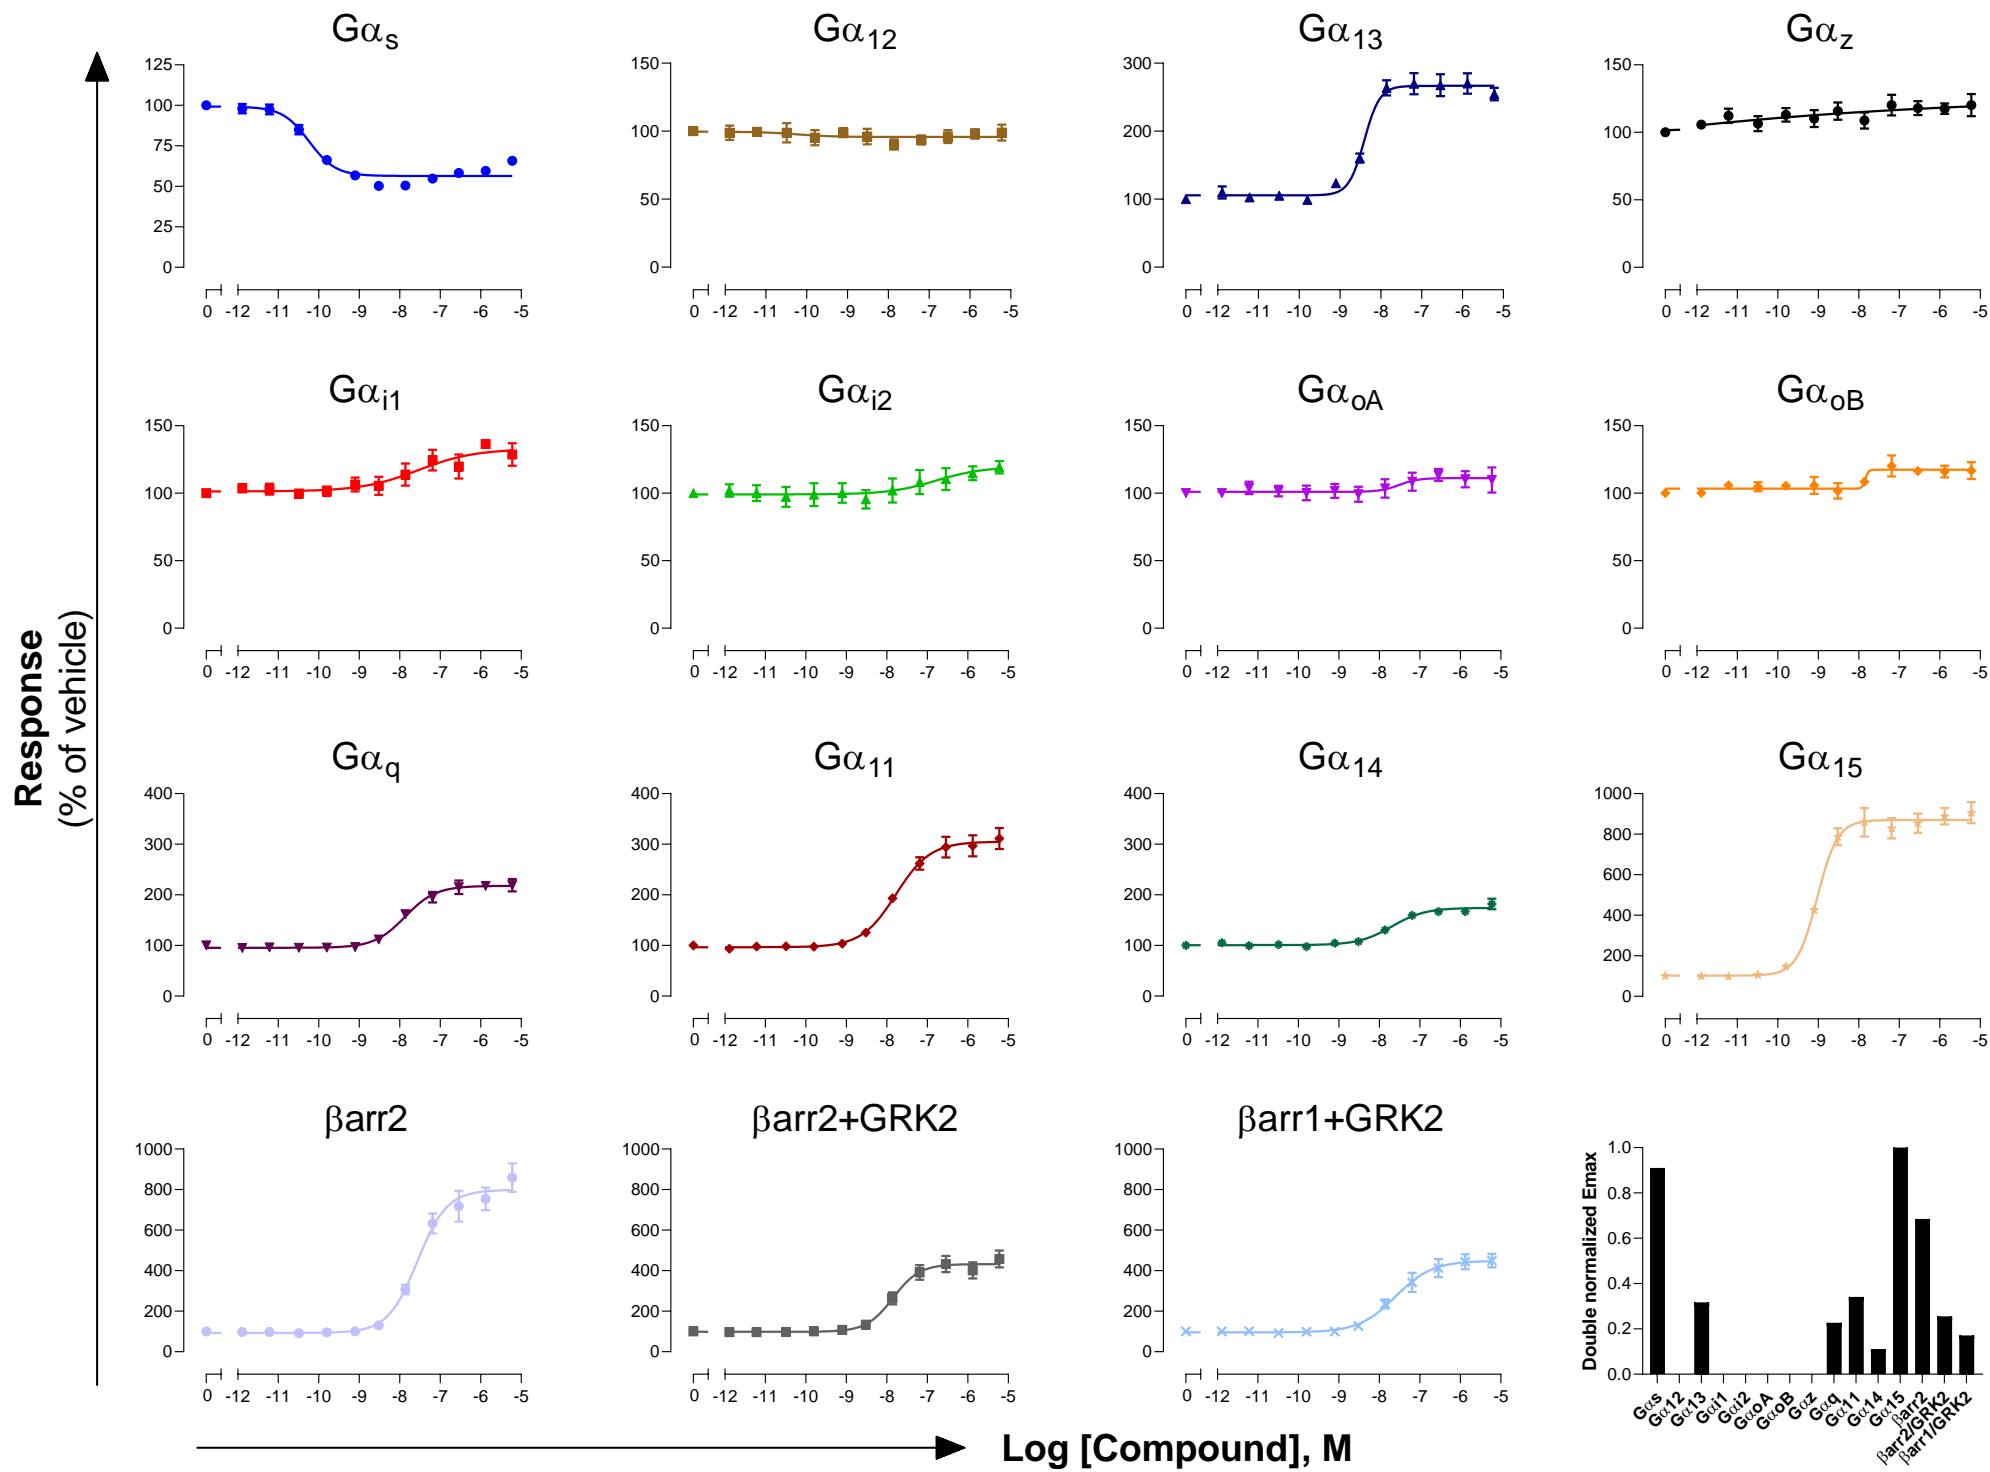

# GPCR: VPAC<sub>1</sub>

Ligand: VIP

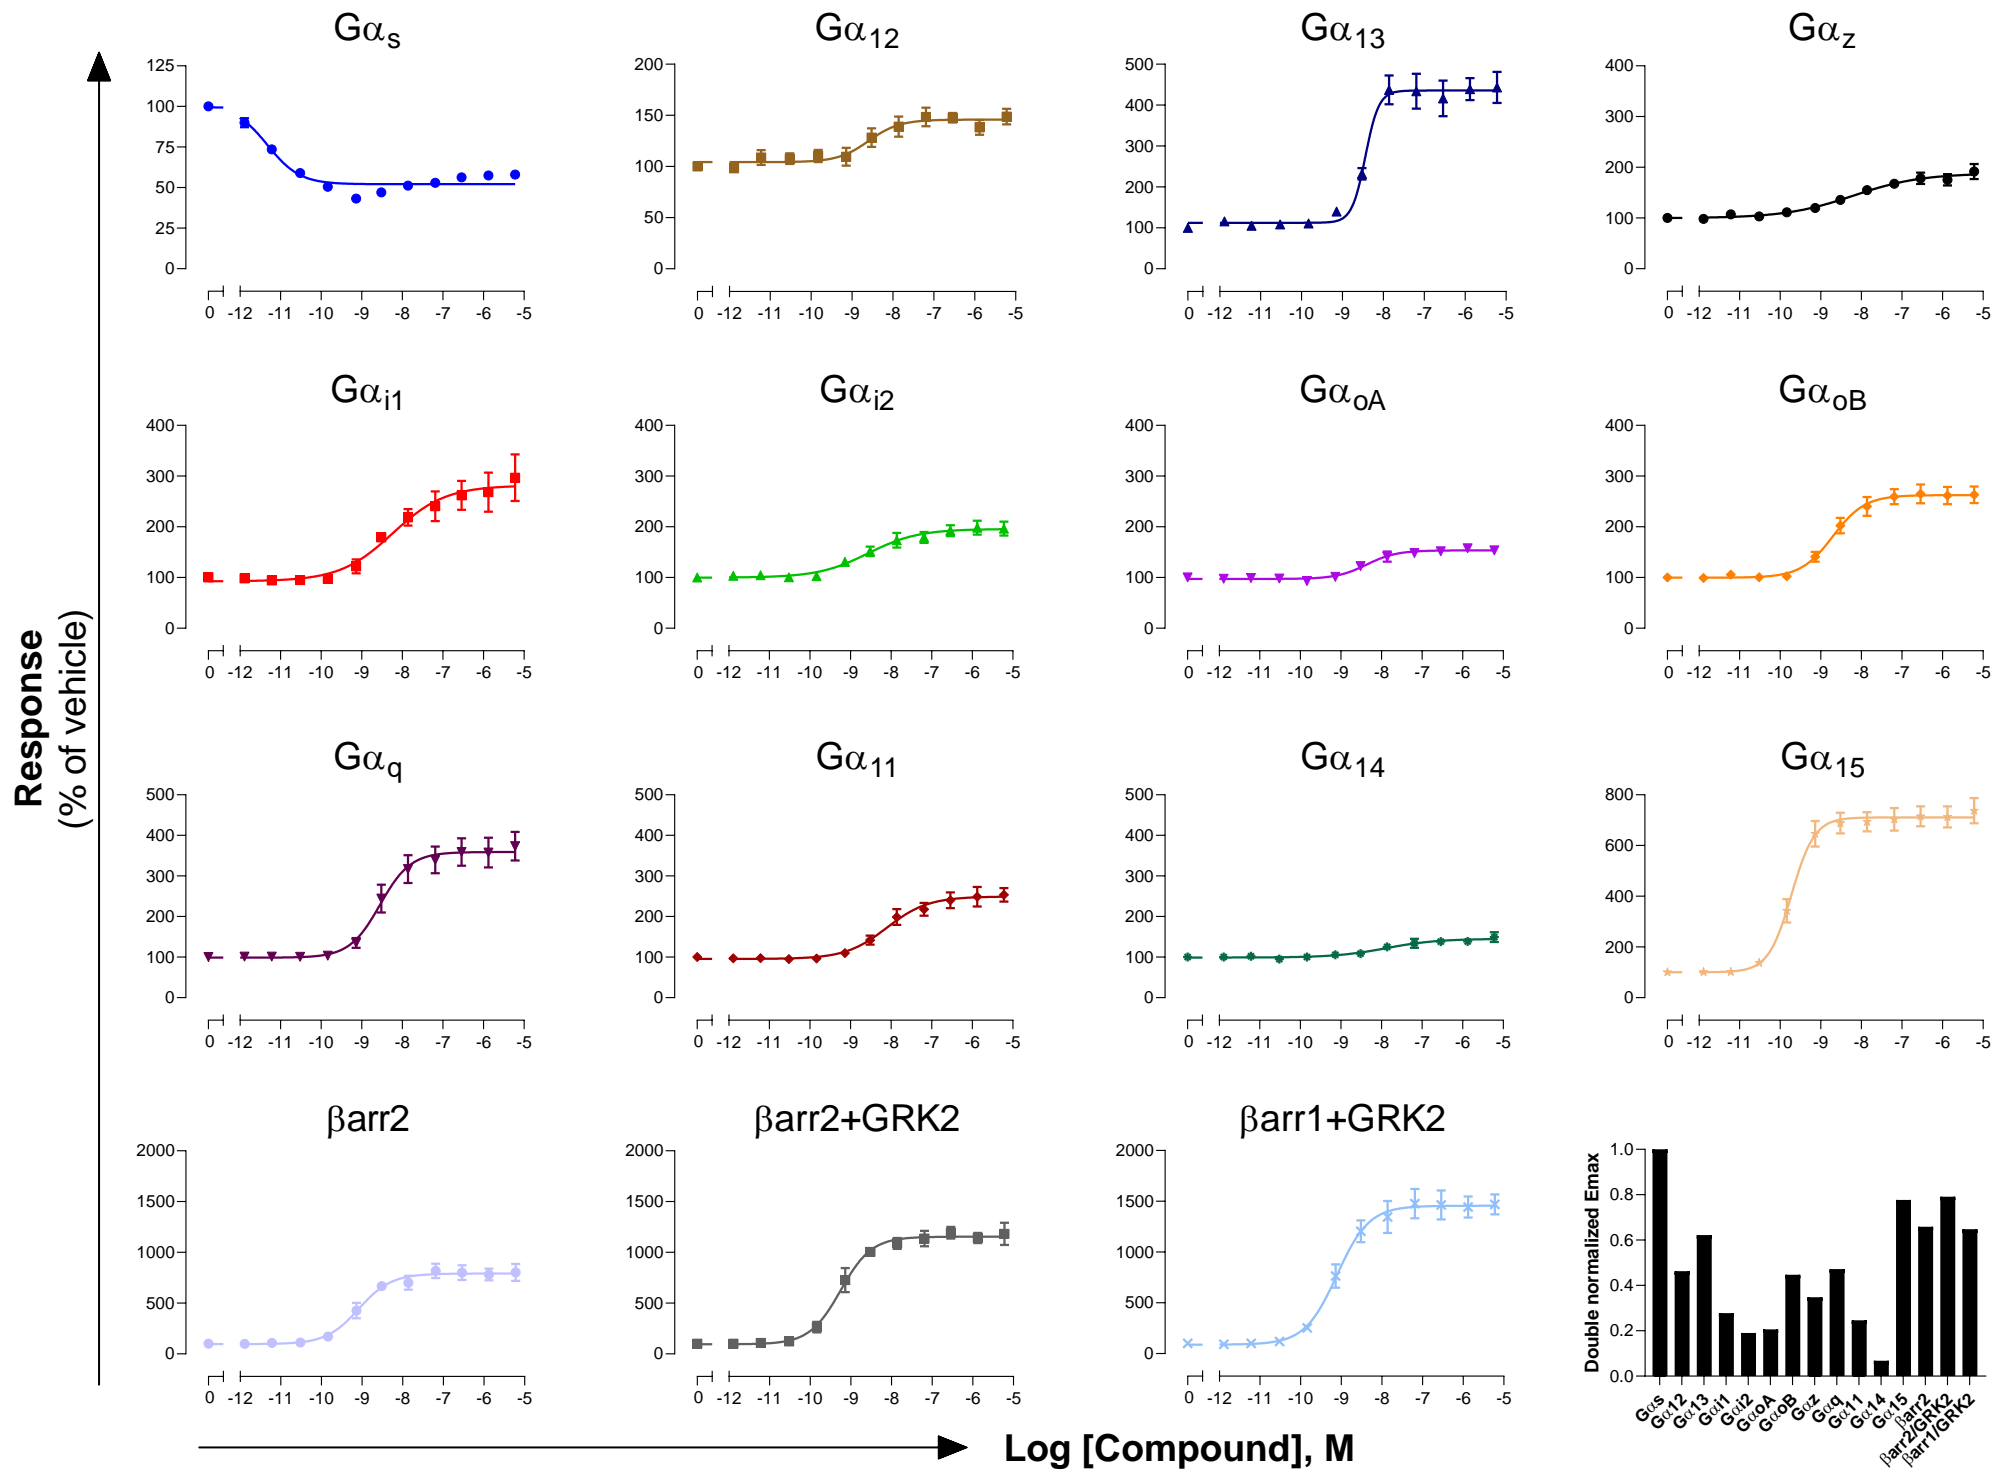

**GPCR: Y<sub>1</sub>**  
**Ligand: NPY**

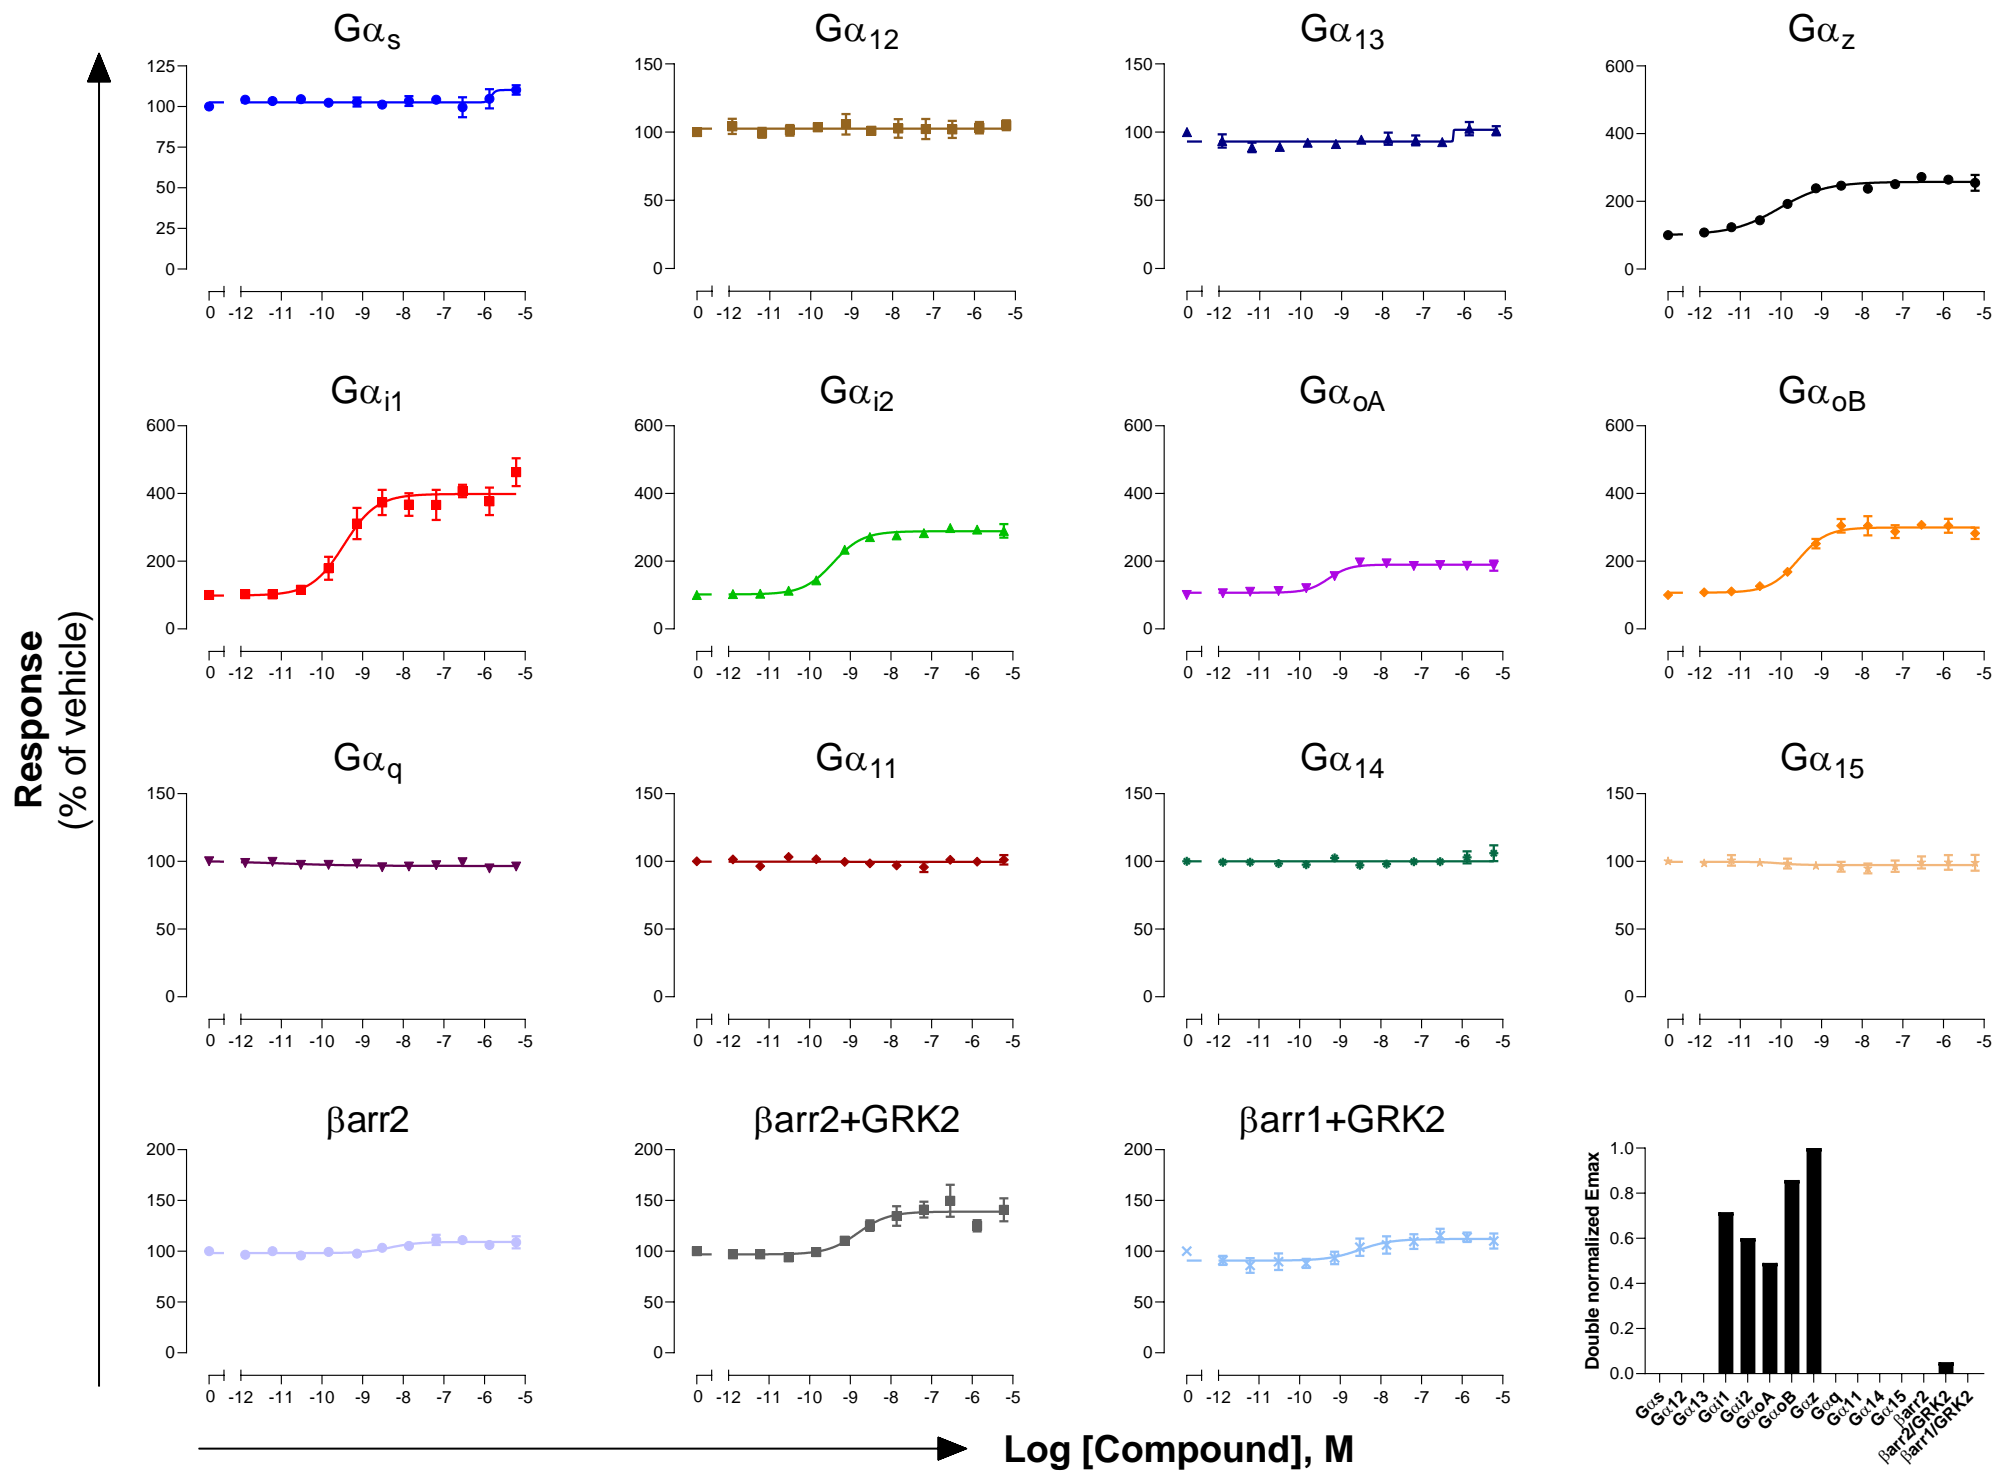

**GPCR: Y<sub>5</sub>**  
**Ligand: NPY**

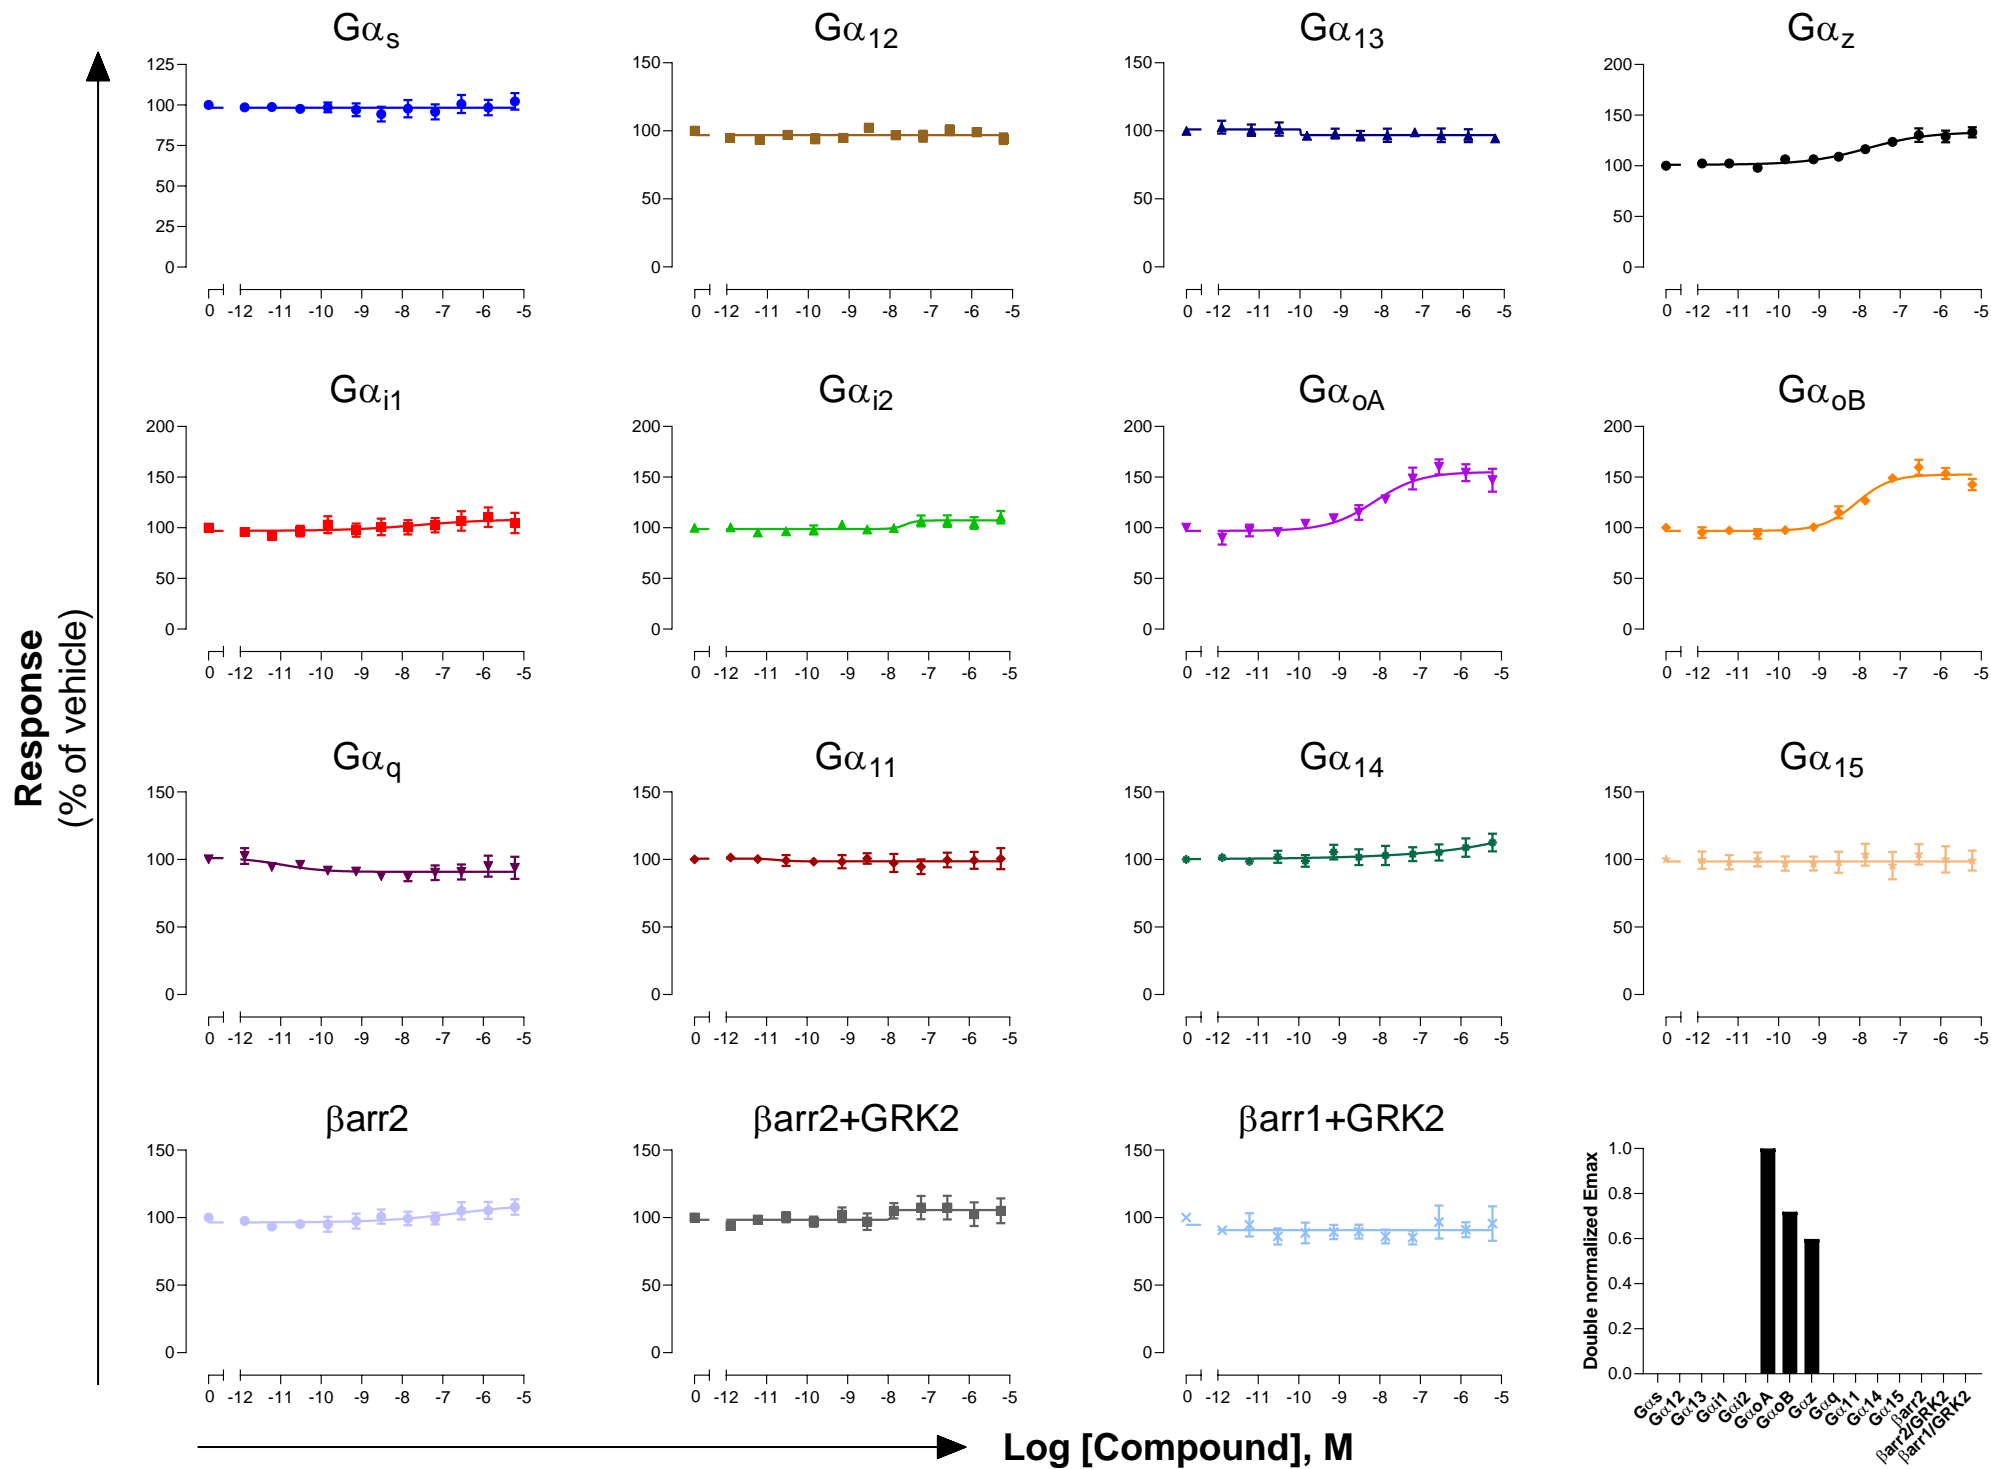

Supplement: supp3 [file elife-74101-supp3-v2.pdf]
