# Supplementary material for: Effector membrane translocation biosensors reveal G protein and βarrestin coupling profiles of 100 therapeutically relevant GPCRs
Source: eLife. 2022 Mar 18;11:e74101. doi: 10.7554/eLife.74101 (PMC9005190; doi:10.7554/eLife.74101)
Supplement: Figure 2—figure supplement 1—source data 1. [file elife-74101-fig2-figsupp1-data1.xlsx]

## Sheet: Figure 2- figure supplement 1
Source data for Figure 2- figure supplement 1
Figure supplement 1A; D2: Rap1GAP-RlucII/rGFP-CAAX + Gαi/o
Parental cells
Log [Dopamine], M	Mock			Gαi1			Gαi2			GαoA			GαoB			Gαz
Vehicle	0.07	0.07	0.08	0.14	0.11	0.16	0.27	0.19	0.33	0.19	0.13	0.21	0.32	0.351	0.354	0.39	0.38	0.6
-6	0.17	0.13	0.17	0.93	0.61	1.06	1.14	0.77	1.22	0.51	0.34	0.69	1.117	1.138	1.225	1.37	1.1	1.69
-6.49	0.18	0.14	0.17	0.9	0.65	0.99	1.09	0.76	1.22	0.57	0.36	0.6	1.128	1.172	1.248	1.43	1.07	1.51
-6.98	0.18	0.13	0.17	0.9	0.61	1.06	1.13	0.77	1.14	0.54	0.36	0.6	1.128	1.161	1.217	1.3	1.04	1.38
-7.46	0.18	0.13	0.16	0.8	0.57	0.98	0.98	0.66	1.11	0.56	0.37	0.61	1.133	1.187	1.156	1.23	0.98	1.33
-7.95	0.16	0.11	0.14	0.82	0.43	0.76	0.74	0.53	0.9	0.59	0.36	0.61	1.115	1.128	1.211	1.13	0.96	1.2
-8.44	0.14	0.1	0.12	0.55	0.27	0.48	0.55	0.41	0.63	0.48	0.32	0.52	1.081	1.119	1.127	0.97	0.74	1.06
-8.93	0.1	0.09	0.1	0.34	0.19	0.29	0.44	0.28	0.49	0.44	0.29	0.44	0.958	1.021	1.023	0.74	0.69	0.83
-9.42	0.08	0.08	0.09	0.21	0.14	0.2	0.36	0.23	0.38	0.32	0.22	0.31	0.674	0.88	0.762	0.58	0.63	0.69
-9.92	0.08	0.08	0.08	0.17	0.12	0.19	0.3	0.21	0.35	0.25	0.17	0.25	0.465	0.498	0.544	0.53	0.53	0.68
-10.4	0.08	0.07	0.08	0.15	0.12	0.17	0.27	0.2	0.33	0.22	0.15	0.24	0.398	0.403	0.403	0.48	0.52	0.69
-10.89	0.07	0.06	0.07	0.14	0.11	0.17	0.27	0.21	0.33	0.2	0.13	0.23	0.404	0.367	0.344	0.42	0.4	0.6
KO Gs cells
Log [Dopamine], M	Mock			Gαi1			Gαi2			GαoA			GαoB			Gαz
Vehicle	0.08	0.06	0.09	0.14	0.17	0.16	0.27	0.36	0.39	0.24	0.25	0.25	0.39	0.45	0.387	0.39	0.44	0.49
-6	0.24	0.12	0.24	1.04	1.28	1.29	1.29	1.72	1.83	0.61	0.68	0.63	1.45	1.66	1.352	1.72	2.23	2.04
-6.49	0.24	0.11	0.29	1.1	1.35	1.16	1.42	1.61	1.62	0.62	0.69	0.64	1.66	1.76	1.401	1.71	1.87	2.01
-6.98	0.24	0.12	0.28	1.05	1.31	1.19	1.4	1.61	1.54	0.65	0.74	0.69	1.52	1.65	1.395	1.73	1.86	1.97
-7.46	0.24	0.12	0.26	0.96	1.28	1.2	1.35	1.46	1.6	0.63	0.68	0.7	1.59	1.82	1.371	1.68	1.82	1.89
-7.95	0.22	0.11	0.24	0.87	1.08	0.94	1.29	1.38	1.42	0.62	0.68	0.7	1.6	1.67	1.369	1.64	1.63	1.71
-8.44	0.2	0.1	0.22	0.7	0.81	0.67	0.96	0.99	0.89	0.61	0.67	0.65	1.57	1.6	1.37	1.42	1.28	1.32
-8.93	0.16	0.09	0.18	0.47	0.45	0.4	0.69	0.63	0.66	0.57	0.61	0.58	1.49	1.36	1.147	0.97	0.81	0.89
-9.42	0.13	0.08	0.12	0.24	0.27	0.24	0.45	0.45	0.43	0.45	0.46	0.44	1.22	1.1	0.931	0.68	0.64	0.63
-9.92	0.1	0.06	0.1	0.17	0.19	0.18	0.32	0.37	0.37	0.29	0.31	0.31	0.8	0.7	0.636	0.58	0.51	0.5
-10.4	0.09	0.06	0.1	0.14	0.18	0.16	0.3	0.38	0.34	0.26	0.28	0.26	0.53	0.52	0.49	0.48	0.45	0.47
-10.89	0.09	0.06	0.09	0.15	0.18	0.17	0.29	0.36	0.33	0.23	0.25	0.24	0.45	0.43	0.447	0.46	0.45	0.49
KO G12/13 cells
Log [Dopamine], M	Mock			Gi1			Gi2			GoA			GoB			Gz
Vehicle	0.07	0.07	0.08	0.14	0.12	0.17	0.28	0.25	0.42	0.16	0.15	0.19	0.25	0.27	0.37	0.49	0.46	0.65	0.588
-6	0.13	0.14	0.17	0.84	0.79	1.19	0.88	1	1.7	0.43	0.4	0.48	0.96	1.04	1.48	1.37	1.42	1.89	1.652
-6.49	0.17	0.18	0.17	0.86	0.85	1.37	1.02	1.15	1.23	0.46	0.45	0.55	0.9	1.06	1.34	1.34	1.4	1.87	1.584
-6.98	0.18	0.16	0.16	0.82	0.76	1.02	0.84	1.06	1.15	0.45	0.49	0.56	0.94	1.1	1.37	1.31	1.29	1.54	1.581
-7.46	0.16	0.15	0.18	0.6	0.7	0.88	0.81	0.98	1.12	0.48	0.45	0.54	1.01	1.09	1.37	1.31	1.31	1.47	1.504
-7.95	0.16	0.16	0.15	0.54	0.58	0.71	0.61	0.83	0.86	0.43	0.46	0.51	0.98	1.07	1.3	1.06	1.32	1.44	1.395
-8.44	0.1	0.11	0.12	0.36	0.37	0.49	0.46	0.56	0.75	0.39	0.39	0.47	0.71	0.99	1.25	0.92	1.06	1.23	1.167
-8.93	0.08	0.09	0.11	0.25	0.25	0.33	0.34	0.42	0.56	0.32	0.39	0.38	0.64	0.81	0.99	0.76	0.84	1.09	0.999
-9.42	0.07	0.08	0.09	0.18	0.15	0.24	0.29	0.32	0.49	0.26	0.25	0.29	0.5	0.63	0.8	0.7	0.64	0.87	0.89
-9.92	0.07	0.08	0.09	0.15	0.13	0.19	0.27	0.28	0.5	0.18	0.2	0.26	0.36	0.48	0.56	0.58	0.61	0.83	0.748
-10.4	0.07	0.08	0.08	0.14	0.13	0.19	0.25	0.29	0.44	0.16	0.17	0.26	0.3	0.33	0.47	0.59	0.6	0.85	0.708
-10.89	0.07	0.07	0.08	0.14	0.13	0.22	0.29	0.28	0.44	0.17	0.16	0.25	0.29	0.3	0.44	0.54	0.44	0.82	0.727
KO Gq/11 cells
Log [Dopamine], M	Mock			Gi1			Gi2			GoA			GoB			Gz
Vehicle	0.07	0.07	0.07	0.11	0.13	0.14	0.19	0.26	0.28	0.12	0.17	0.17	0.21	0.31	0.33	0.44	0.55	0.46
-6	0.11	0.13	0.16	0.75	0.88	1.12	0.96	0.94	1.25	0.35	0.46	0.54	0.84	1.09	1.41	1.13	1.34	1.43
-6.49	0.12	0.14	0.15	0.76	0.82	1.1	0.93	0.84	1.16	0.38	0.4	0.53	0.89	1.14	1.15	1.09	1.14	1.36
-6.98	0.12	0.14	0.16	0.79	0.74	0.95	0.99	0.73	1.05	0.4	0.47	0.48	0.99	1.02	1.15	1.05	1.18	1.33
-7.46	0.11	0.12	0.15	0.73	0.67	0.85	0.86	0.71	1.02	0.4	0.43	0.5	0.98	1.03	1.19	1.03	1.04	1.21
-7.95	0.11	0.13	0.14	0.62	0.44	0.71	0.76	0.58	0.81	0.39	0.43	0.48	1.02	1.01	1.21	0.99	1	1.11
-8.44	0.09	0.1	0.12	0.41	0.35	0.47	0.48	0.4	0.57	0.37	0.36	0.45	0.96	0.9	1.11	0.83	0.84	0.89
-8.93	0.08	0.09	0.1	0.24	0.23	0.27	0.34	0.35	0.42	0.32	0.33	0.35	0.94	0.78	0.88	0.74	0.8	0.71
-9.42	0.07	0.08	0.09	0.14	0.16	0.18	0.25	0.3	0.35	0.21	0.24	0.28	0.62	0.59	0.65	0.59	0.69	0.58
-9.92	0.07	0.08	0.08	0.12	0.15	0.16	0.21	0.29	0.32	0.17	0.2	0.22	0.42	0.46	0.44	0.49	0.69	0.57
-10.4	0.06	0.08	0.08	0.12	0.14	0.18	0.21	0.27	0.3	0.17	0.19	0.2	0.31	0.39	0.36	0.49	0.65	0.5
-10.89	0.06	0.08	0.08	0.11	0.22	0.17	0.19	0.27	0.29	0.15	0.18	0.21	0.25	0.33	0.33	0.47	0.65	0.55
KO Gi/o cells
Log [Dopamine], M	Mock			Gi1			Gi2			GoA			GoB			Gz
Vehicle	0.06	0.07	0.06	0.09	0.12	0.13	0.18	0.23	0.22	0.11	0.16	0.13	0.2	0.27	0.24	0.38	0.46	0.41
-6	0.06	0.08	0.06	0.46	0.66	0.65	0.69	0.99	0.69	0.24	0.4	0.33	0.87	0.97	0.789	0.77	0.93	0.87
-6.49	0.07	0.08	0.06	0.46	0.6	0.62	0.6	0.76	0.66	0.27	0.44	0.41	0.71	0.92	0.766	0.81	1	0.82
-6.98	0.07	0.08	0.06	0.42	0.59	0.66	0.64	0.7	0.65	0.26	0.37	0.34	0.7	0.98	0.764	0.77	0.85	0.82
-7.46	0.06	0.08	0.06	0.35	0.51	0.51	0.45	0.6	0.53	0.26	0.4	0.33	0.74	0.93	0.751	0.67	0.85	0.8
-7.95	0.06	0.07	0.06	0.25	0.34	0.45	0.41	0.51	0.46	0.25	0.4	0.34	0.66	0.83	0.779	0.6	0.74	0.65
-8.44	0.06	0.08	0.05	0.18	0.23	0.28	0.26	0.36	0.34	0.22	0.41	0.31	0.64	0.8	0.727	0.5	0.66	0.55
-8.93	0.07	0.08	0.06	0.13	0.17	0.19	0.21	0.31	0.29	0.2	0.32	0.26	0.58	0.62	0.588	0.49	0.58	0.46
-9.42	0.07	0.07	0.06	0.11	0.14	0.14	0.19	0.28	0.25	0.16	0.25	0.21	0.41	0.46	0.515	0.48	0.56	0.44
-9.92	0.06	0.08	0.06	0.1	0.14	0.13	0.17	0.25	0.24	0.13	0.2	0.16	0.3	0.38	0.361	0.46	0.56	0.42
-10.4	0.06	0.08	0.06	0.1	0.15	0.12	0.17	0.27	0.23	0.13	0.18	0.15	0.26	0.33	0.295	0.44	0.54	0.4
-10.89	0.07	0.08	0.06	0.09	0.13	0.15	0.18	0.26	0.25	0.13	0.18	0.15	0.22	0.36	0.276	0.41	0.5	0.43
Figure supplement 1B; GnRHR: p63-RhoGEF-RlucII/rGFP-CAAX + Gαq/11
Parental cells
Log [LH-RH], M	Mock				Gαq				Gα11				Gα14				Gα15
Vehicle	0.132	0.15	0.154	0.151	0.216	0.246	0.206	0.228	0.231	0.262	0.214	0.219	0.228	0.261	0.187	0.211	0.155	0.159	0.146	0.144
-5.22	0.355	0.366	0.367	0.387	1.055	1.089	0.985	1.008	1.153	1.329	1.059	1.067	0.756	0.741	0.636	0.697	0.629	0.647	0.6	0.65
-5.88	0.363	0.351	0.367	0.394	1.089	1.106	0.995	0.967	1.219	1.31	1.065	1.032	0.779	0.748	0.625	0.657	0.626	0.651	0.623	0.618
-6.54	0.343	0.379	0.367	0.377	1.107	1.154	0.938	0.959	1.202	1.158	1.075	1.016	0.811	0.76	0.623	0.668	0.656	0.656	0.592	0.625
-7.19	0.369	0.379	0.355	0.4	1.143	1.139	0.919	0.954	1.283	1.229	1.092	1.065	0.812	0.762	0.622	0.676	0.635	0.595	0.617	0.608
-7.86	0.358	0.395	0.353	0.373	1.06	1.103	0.942	0.959	1.178	1.208	1.106	1.055	0.791	0.751	0.622	0.624	0.659	0.622	0.612	0.595
-8.52	0.353	0.351	0.341	0.359	1.084	1.131	0.937	0.938	1.225	1.243	1.056	0.98	0.676	0.628	0.549	0.567	0.577	0.529	0.565	0.553
-9.14	0.294	0.295	0.274	0.298	0.974	0.986	0.802	0.788	1.017	0.986	0.941	0.82	0.509	0.481	0.453	0.404	0.456	0.395	0.469	0.382
-9.84	0.234	0.212	0.234	0.209	0.629	0.593	0.559	0.505	0.643	0.612	0.628	0.489	0.338	0.305	0.258	0.26	0.248	0.224	0.254	0.21
-10.52	0.168	0.163	0.183	0.148	0.341	0.33	0.282	0.29	0.359	0.326	0.303	0.282	0.249	0.237	0.198	0.223	0.174	0.169	0.166	0.162
-11.22	0.138	0.154	0.164	0.141	0.254	0.264	0.213	0.235	0.269	0.257	0.212	0.219	0.234	0.211	0.181	0.213	0.16	0.16	0.143	0.155
-11.89	0.143	0.15	0.153	0.145	0.239	0.26	0.207	0.241	0.256	0.269	0.228	0.215	0.244	0.22	0.196	0.231	0.166	0.155	0.146	0.159
KO Gs cells
Log [LH-RH], M	Mock				Gαq				Gα11				Gα14				Gα15
Vehicle	0.22	0.221	0.207	0.228	0.284	0.312	0.25	0.266	0.283	0.319	0.24	0.266	0.252	0.239	0.205	0.225	0.182	0.182	0.177	0.179
-5.22	0.539	0.61	0.515	0.585	1.263	1.253	1.161	1.192	1.131	1.197	0.96	1.027	0.934	1.083	0.947	1.086	0.906	0.95	0.941	0.997
-5.88	0.542	0.562	0.537	0.56	1.274	1.157	1.164	1.127	1.087	1.123	1.052	1.044	0.947	0.937	0.944	1.104	0.912	0.938	0.892	0.984
-6.54	0.497	0.512	0.466	0.565	1.135	1.215	1.213	1.129	1.078	1.089	1.033	0.994	0.896	0.965	0.971	1.117	0.864	0.912	0.927	0.992
-7.19	0.488	0.507	0.532	0.583	1.149	1.231	1.156	1.2	1.077	1.078	1.024	0.971	0.905	0.949	0.994	1.054	0.861	0.913	1.013	0.888
-7.86	0.52	0.524	0.532	0.568	1.268	1.193	1.162	1.197	1.064	1.083	0.91	0.941	0.931	0.891	1.004	1.042	0.809	0.93	0.937	0.985
-8.52	0.518	0.55	0.503	0.57	1.179	1.271	1.141	1.183	1.144	1	0.966	0.959	0.789	0.772	0.913	0.952	0.748	0.776	0.872	0.849
-9.14	0.452	0.465	0.536	0.519	1.219	1.071	1.084	1.082	1.081	0.971	1.057	0.91	0.651	0.571	0.805	0.633	0.619	0.563	0.743	0.619
-9.84	0.367	0.342	0.369	0.388	0.923	0.918	0.915	0.827	0.876	0.805	0.835	0.709	0.395	0.336	0.392	0.34	0.337	0.288	0.38	0.29
-10.52	0.248	0.259	0.254	0.241	0.489	0.471	0.531	0.405	0.483	0.422	0.457	0.361	0.268	0.291	0.267	0.241	0.212	0.221	0.239	0.201
-11.22	0.23	0.222	0.212	0.203	0.326	0.317	0.306	0.286	0.307	0.29	0.274	0.263	0.242	0.255	0.241	0.231	0.197	0.202	0.188	0.187
-11.89	0.195	0.205	0.209	0.203	0.279	0.309	0.261	0.278	0.28	0.28	0.253	0.254	0.252	0.294	0.226	0.252	0.193	0.203	0.187	0.184
KO G12/13 cells
Log [LH-RH], M	Mock				Gαq				Gα11				Gα14				Gα15
Vehicle	0.154	0.134	0.151	0.154	0.231	0.253	0.202	0.223	0.253	0.258	0.203	0.225	0.217	0.237	0.192	0.224	0.162	0.158	0.153	0.169
-5.22	0.348	0.293	0.358	0.365	1.136	1.131	0.977	1.026	1.147	1.227	0.959	1.034	0.681	0.667	0.59	0.633	0.609	0.64	0.634	0.635
-5.88	0.345	0.344	0.359	0.353	1.126	1.085	0.992	0.99	1.129	1.186	0.99	1.016	0.682	0.678	0.616	0.604	0.627	0.613	0.663	0.635
-6.54	0.361	0.294	0.362	0.372	1.14	1.083	1.002	1.022	1.069	1.103	1.014	0.983	0.634	0.654	0.634	0.609	0.619	0.623	0.629	0.645
-7.19	0.36	0.318	0.403	0.36	1.08	1.06	1.003	0.944	1.111	1.144	1.016	0.971	0.64	0.688	0.613	0.596	0.639	0.659	0.664	0.612
-7.86	0.349	0.323	0.393	0.377	1.086	1.07	0.976	0.937	1.086	1.124	1.032	0.978	0.63	0.637	0.609	0.574	0.624	0.605	0.639	0.62
-8.52	0.335	0.317	0.346	0.332	1.063	1.028	0.965	0.878	0.996	1.032	0.985	0.917	0.553	0.561	0.554	0.507	0.517	0.528	0.577	0.531
-9.14	0.272	0.241	0.283	0.265	0.905	0.88	0.79	0.729	0.941	0.868	0.799	0.721	0.444	0.425	0.405	0.353	0.394	0.386	0.418	0.36
-9.84	0.21	0.189	0.209	0.198	0.58	0.568	0.458	0.449	0.591	0.557	0.48	0.416	0.292	0.266	0.237	0.262	0.225	0.225	0.231	0.221
-10.52	0.172	0.153	0.166	0.156	0.344	0.331	0.291	0.268	0.348	0.321	0.272	0.268	0.226	0.229	0.195	0.218	0.186	0.178	0.174	0.177
-11.22	0.158	0.145	0.16	0.152	0.256	0.26	0.224	0.231	0.256	0.273	0.21	0.221	0.214	0.222	0.187	0.21	0.171	0.168	0.164	0.174
-11.89	0.156	0.15	0.144	0.143	0.239	0.248	0.22	0.222	0.248	0.266	0.217	0.229	0.221	0.244	0.207	0.207	0.172	0.177	0.162	0.16
KO Gq/11 cells
Log [LH-RH], M	Mock			Gαq			Gα11			Gα14			Gα15
Vehicle	0.11	0.1	0.11	0.21	0.23	0.22	0.21	0.22	0.22	0.18	0.18	0.19	0.13	0.12	0.14
-5.22	0.12	0.1	0.11	0.82	0.85	0.86	1.04	1	0.97	0.34	0.31	0.32	0.43	0.41	0.58
-5.88	0.11	0.09	0.11	0.83	0.7	0.78	0.99	0.89	0.87	0.33	0.28	0.3	0.44	0.43	0.53
-6.54	0.12	0.11	0.1	0.82	0.72	0.74	1.08	0.87	0.84	0.34	0.27	0.3	0.44	0.41	0.48
-7.19	0.12	0.11	0.12	0.82	0.7	0.75	1.04	1.01	0.84	0.33	0.28	0.29	0.42	0.43	0.48
-7.86	0.11	0.11	0.12	0.82	0.7	0.73	1.02	0.86	0.91	0.31	0.26	0.29	0.42	0.4	0.43
-8.52	0.11	0.09	0.1	0.76	0.62	0.65	0.95	0.87	0.82	0.27	0.23	0.24	0.37	0.34	0.35
-9.14	0.11	0.1	0.11	0.67	0.54	0.55	0.86	0.66	0.62	0.22	0.21	0.21	0.28	0.25	0.28
-9.84	0.11	0.09	0.11	0.44	0.3	0.34	0.52	0.36	0.34	0.19	0.18	0.2	0.15	0.15	0.17
-10.52	0.11	0.1	0.11	0.26	0.24	0.23	0.28	0.24	0.23	0.17	0.18	0.19	0.13	0.13	0.15
-11.22	0.11	0.1	0.11	0.21	0.2	0.21	0.23	0.21	0.21	0.18	0.18	0.19	0.13	0.13	0.15
-11.89	0.11	0.1	0.11	0.21	0.2	0.2	0.23	0.2	0.2	0.19	0.18	0.19	0.12	0.13	0.14
KO Gi/o cells
Log [LH-RH], M	Mock			Gαq			Gα11			Gα14			Gα15
Vehicle	0.13	0.14	0.09	0.15	0.2	0.16	0.17	0.22	0.19	0.14	0.16	0.16	0.1	0.12	0.11
-5.22	0.22	0.16	0.12	0.56	0.62	0.58	0.68	0.75	0.72	0.34	0.34	0.35	0.3	0.35	0.33
-5.88	0.25	0.14	0.12	0.55	0.57	0.54	0.71	0.73	0.69	0.35	0.36	0.35	0.29	0.31	0.34
-6.54	0.24	0.15	0.12	0.54	0.58	0.57	0.72	0.74	0.72	0.35	0.35	0.35	0.31	0.32	0.34
-7.19	0.23	0.15	0.12	0.53	0.56	0.52	0.71	0.72	0.66	0.35	0.35	0.35	0.29	0.37	0.32
-7.86	0.25	0.15	0.12	0.54	0.55	0.52	0.68	0.73	0.68	0.34	0.33	0.34	0.28	0.32	0.33
-8.52	0.23	0.15	0.11	0.54	0.52	0.5	0.68	0.68	0.63	0.32	0.31	0.32	0.26	0.26	0.28
-9.14	0.2	0.15	0.11	0.46	0.41	0.44	0.62	0.52	0.55	0.27	0.24	0.3	0.2	0.2	0.23
-9.84	0.14	0.14	0.09	0.31	0.25	0.31	0.39	0.32	0.33	0.18	0.18	0.2	0.15	0.16	0.14
-10.52	0.13	0.12	0.09	0.21	0.2	0.2	0.23	0.21	0.21	0.15	0.16	0.16	0.13	0.15	0.12
-11.22	0.12	0.13	0.08	0.17	0.16	0.19	0.19	0.19	0.2	0.15	0.16	0.16	0.12	0.13	0.11
-11.89	0.12	0.14	0.08	0.18	0.19	0.2	0.18	0.2	0.19	0.15	0.16	0.16	0.11	0.13	0.12
Figure supplement 1C; GIP: Rap1GAP-RlucII/rGFP-CAAX + Gαi/o
Parental cells
Log [GIP], M	Mock			Gi1			Gi2			GoA			GoB			Gαz
Vehicle	0.07	0.06	0.06	0.14	0.19	0.17	0.31	0.34	0.38	0.17	0.21	0.2	0.23	0.26	0.28	0.61	0.479	0.625	0.68
-6.22	0.13	0.08	0.08	0.63	0.56	0.71	0.94	0.83	1.07	0.43	0.44	0.51	0.81	0.85	0.9	1.44	1.434	1.52	1.514
-6.88	0.13	0.08	0.08	0.64	0.6	0.69	0.96	0.84	0.98	0.43	0.45	0.52	0.93	0.76	0.94	1.42	1.375	1.476	1.492
-7.54	0.14	0.07	0.08	0.59	0.54	0.64	0.83	0.79	0.93	0.4	0.46	0.52	0.79	0.82	0.92	1.3	1.384	1.503	1.505
-8.19	0.12	0.08	0.08	0.49	0.51	0.51	0.75	0.79	0.9	0.39	0.42	0.46	0.76	0.79	0.82	1.24	1.36	1.448	1.458
-8.86	0.11	0.07	0.07	0.32	0.35	0.34	0.57	0.58	0.55	0.32	0.34	0.34	0.51	0.66	0.57	1.05	1.274	1.363	1.362
-9.52	0.09	0.06	0.06	0.2	0.23	0.26	0.36	0.4	0.45	0.22	0.25	0.27	0.34	0.41	0.43	0.87	1.026	1.142	1.127
-10.17	0.08	0.06	0.06	0.16	0.2	0.2	0.32	0.35	0.4	0.19	0.22	0.24	0.27	0.33	0.34	0.77	0.516	0.761	0.687
-10.84	0.07	0.06	0.06	0.17	0.19	0.19	0.3	0.36	0.4	0.2	0.22	0.23	0.27	0.32	0.33	0.71	0.467	0.758	0.669
-11.53	0.07	0.06	0.06	0.15	0.2	0.2	0.33	0.33	0.38	0.19	0.21	0.24	0.27	0.31	0.31	0.69	0.414	0.698	0.596
-12.21	0.07	0.06	0.06	0.15	0.2	0.2	0.31	0.34	0.38	0.19	0.23	0.23	0.27	0.31	0.32	0.66	0.399	0.769	0.643
-12.92	0.07	0.06	0.06	0.15	0.21	0.2	0.3	0.35	0.36	0.18	0.21	0.22	0.25	0.3	0.31	0.64	0.457	0.681	0.572
KO Gs cells
Log [GIP], M	Mock			Gi1			Gi2			GoA			GoB			Gαz
Vehicle	0.07	0.06	0.1	0.15	0.16	0.18	0.31	0.39	0.42	0.24	0.25	0.3	0.35	0.42	0.308	0.57	0.59	0.62	0.507
-6.22	0.12	0.13	0.31	0.93	0.81	0.83	1.13	1.34	1.35	0.72	0.67	0.75	1.38	1.56	1.053	1.54	1.92	2.06	1.636
-6.88	0.12	0.11	0.25	0.89	0.79	0.87	1.18	1.36	1.35	0.69	0.73	0.81	1.52	1.54	1.053	1.57	1.91	2.01	1.581
-7.54	0.11	0.12	0.3	0.92	0.77	0.84	1.09	1.27	1.29	0.73	0.71	0.8	1.4	1.6	1.072	1.48	1.78	2	1.455
-8.19	0.11	0.11	0.27	0.77	0.74	0.77	0.98	1.34	1.3	0.65	0.68	0.78	1.37	1.57	1.073	1.42	1.77	1.89	1.565
-8.86	0.09	0.1	0.21	0.48	0.59	0.59	0.68	1.1	1.07	0.47	0.61	0.66	1.11	1.33	1.016	1.26	1.66	1.73	1.451
-9.52	0.08	0.08	0.14	0.24	0.34	0.32	0.44	0.72	0.64	0.32	0.43	0.44	0.63	0.88	0.791	0.88	1.33	1.17	1.219
-10.17	0.07	0.06	0.1	0.16	0.16	0.16	0.32	0.38	0.39	0.24	0.26	0.28	0.39	0.43	0.3	0.66	0.65	0.69	0.479
-10.84	0.06	0.06	0.1	0.16	0.16	0.16	0.31	0.36	0.37	0.24	0.24	0.28	0.39	0.41	0.297	0.62	0.59	0.63	0.459
-11.53	0.07	0.06	0.09	0.16	0.16	0.17	0.3	0.38	0.4	0.24	0.24	0.28	0.39	0.43	0.309	0.63	0.6	0.65	0.454
-12.21	0.06	0.06	0.09	0.16	0.15	0.18	0.32	0.37	0.4	0.25	0.25	0.27	0.37	0.42	0.301	0.62	0.6	0.65	0.456
-12.92	0.07	0.06	0.09	0.16	0.15	0.17	0.3	0.34	0.37	0.25	0.25	0.26	0.37	0.38	0.274	0.56	0.6	0.62	0.49
KO G12/13 cells
Log [GIP], M	Mock			Gαi1			Gαi2				GαoA			GαoB			Gαz
Vehicle	0.07	0.06	0.06	0.12	0.21	0.18	0.26	0.44	0.44	0.283	0.14	0.19	0.15	0.17	0.27	0.22	0.61	0.71	0.795	0.778
-6.22	0.1	0.08	0.08	0.44	0.68	0.62	0.83	1.11	1.08	0.762	0.34	0.45	0.35	0.55	0.9	0.57	1.44	1.65	1.872	1.738
-6.88	0.11	0.09	0.09	0.47	0.76	0.61	0.64	1.11	0.97	0.881	0.34	0.43	0.35	0.6	0.84	0.56	1.44	1.46	1.712	1.778
-7.54	0.11	0.09	0.09	0.47	0.63	0.63	0.67	1.02	0.94	0.898	0.32	0.47	0.35	0.59	0.8	0.6	1.39	1.41	1.741	1.656
-8.19	0.09	0.08	0.08	0.45	0.62	0.58	0.56	1	0.86	0.821	0.3	0.44	0.34	0.57	0.79	0.6	1.34	1.31	1.629	1.619
-8.86	0.09	0.07	0.08	0.25	0.44	0.39	0.29	0.69	0.71	0.775	0.23	0.34	0.27	0.41	0.66	0.49	1.06	1.14	1.586	1.516
-9.52	0.08	0.07	0.07	0.17	0.27	0.26	0.33	0.56	0.54	0.549	0.18	0.25	0.2	0.28	0.47	0.34	0.89	0.93	1.394	1.403
-10.17	0.07	0.06	0.07	0.15	0.24	0.22	0.29	0.44	0.49	0.333	0.16	0.21	0.18	0.21	0.34	0.26	0.72	0.84	0.829	0.911
-10.84	0.07	0.06	0.06	0.15	0.23	0.22	0.28	0.43	0.46	0.333	0.14	0.21	0.18	0.2	0.33	0.28	0.65	0.83	0.844	0.914
-11.53	0.07	0.06	0.06	0.15	0.23	0.22	0.28	0.44	0.45	0.314	0.14	0.21	0.17	0.2	0.34	0.29	0.68	0.8	0.776	0.815
-12.21	0.07	0.06	0.06	0.15	0.23	0.22	0.29	0.45	0.44	0.315	0.14	0.21	0.18	0.21	0.34	0.27	0.67	0.78	0.802	0.869
-12.92	0.07	0.06	0.07	0.15	0.18	0.2	0.26	0.44	0.45	0.286	0.14	0.2	0.15	0.19	0.29	0.26	0.65	0.74	0.759	0.769
KO Gq/11 cells
Log [GIP], M	Mock			Gαi1			Gαi2			GαoA			GαoB			Gαz
Vehicle	0.06	0.06	0.08	0.16	0.16	0.16	0.29	0.29	0.34	0.18	0.15	0.2	0.25	0.25	0.31	0.44	0.53	0.43
-6.22	0.07	0.07	0.15	0.7	0.51	0.69	0.92	0.75	0.99	0.49	0.36	0.47	0.86	0.74	0.97	1.29	1.11	1.25
-6.88	0.07	0.07	0.16	0.72	0.49	0.59	0.91	0.69	1.03	0.47	0.32	0.47	0.91	0.74	0.93	1.29	1.09	1.14
-7.54	0.07	0.08	0.15	0.75	0.5	0.57	0.95	0.63	0.9	0.49	0.31	0.48	0.86	0.76	0.89	1.21	1.03	1.13
-8.19	0.07	0.07	0.14	0.52	0.39	0.44	0.8	0.55	0.71	0.41	0.29	0.38	0.83	0.68	0.77	1.14	0.89	0.98
-8.86	0.06	0.07	0.11	0.35	0.3	0.26	0.53	0.39	0.48	0.31	0.24	0.3	0.64	0.52	0.51	0.91	0.89	0.78
-9.52	0.06	0.07	0.1	0.22	0.2	0.2	0.41	0.3	0.39	0.25	0.18	0.25	0.42	0.35	0.41	0.77	0.73	0.59
-10.17	0.06	0.06	0.1	0.18	0.18	0.18	0.35	0.3	0.36	0.21	0.17	0.23	0.31	0.3	0.36	0.61	0.66	0.53
-10.84	0.06	0.07	0.09	0.18	0.17	0.18	0.35	0.29	0.37	0.21	0.17	0.23	0.32	0.29	0.34	0.6	0.63	0.49
-11.53	0.06	0.07	0.09	0.17	0.17	0.19	0.34	0.28	0.36	0.2	0.17	0.23	0.31	0.29	0.33	0.59	0.61	0.5
-12.21	0.06	0.06	0.09	0.17	0.16	0.18	0.33	0.29	0.37	0.2	0.17	0.23	0.3	0.27	0.34	0.51	0.6	0.45
-12.92	0.06	0.06	0.09	0.16	0.17	0.16	0.34	0.26	0.35	0.19	0.17	0.21	0.27	0.26	0.31	0.47	0.6	0.44
KO Gi/o cells
Log [GIP], M	Mock			Gαi1			Gαi2			GαoA			GαoB			Gαz
Vehicle	0.08	0.07	0.06	0.15	0.15	0.13	0.24	0.29	0.25	0.15	0.16	0.14	0.22	0.24	0.198	0.44	0.53	0.4
-6.22	0.08	0.07	0.06	0.32	0.35	0.33	0.53	0.56	0.55	0.27	0.33	0.29	0.5	0.48	0.559	0.81	0.86	0.87
-6.88	0.08	0.07	0.06	0.32	0.36	0.36	0.51	0.54	0.5	0.29	0.33	0.29	0.54	0.54	0.549	0.84	0.83	0.84
-7.54	0.08	0.06	0.06	0.31	0.38	0.34	0.5	0.51	0.47	0.28	0.32	0.3	0.5	0.5	0.619	0.86	0.84	0.86
-8.19	0.08	0.07	0.06	0.28	0.3	0.33	0.44	0.48	0.5	0.29	0.29	0.29	0.52	0.53	0.55	0.75	0.82	0.81
-8.86	0.08	0.07	0.06	0.23	0.24	0.27	0.33	0.42	0.48	0.21	0.25	0.24	0.43	0.43	0.509	0.68	0.72	0.7
-9.52	0.08	0.06	0.06	0.18	0.18	0.21	0.29	0.32	0.35	0.19	0.21	0.2	0.32	0.3	0.394	0.68	0.67	0.64
-10.17	0.09	0.07	0.06	0.16	0.16	0.15	0.29	0.3	0.26	0.18	0.19	0.15	0.28	0.28	0.229	0.59	0.62	0.43
-10.84	0.08	0.07	0.05	0.16	0.16	0.14	0.28	0.28	0.24	0.17	0.18	0.15	0.26	0.3	0.226	0.59	0.57	0.4
-11.53	0.08	0.07	0.06	0.16	0.16	0.14	0.27	0.3	0.26	0.16	0.17	0.14	0.28	0.25	0.214	0.57	0.58	0.38
-12.21	0.08	0.06	0.05	0.15	0.15	0.13	0.27	0.28	0.25	0.16	0.17	0.15	0.26	0.24	0.218	0.54	0.54	0.38
-12.92	0.08	0.07	0.06	0.15	0.17	0.14	0.27	0.28	0.25	0.16	0.17	0.14	0.25	0.24	0.193	0.55	0.59	0.41
Figure supplement 1D; V2: p63-RhoGEF-RlucII/rGFP-CAAX + Gαq/11
Parental cells
Log [AVP], M	Mock			Gαq			Gα11			Gα14			Gα15
Vehicle	0.2	0.2	0.11	0.29	0.27	0.31	0.28	0.25	0.27	0.26	0.22	0.26	0.16	0.15	0.16	0.15
-5.22	0.26	0.24	0.13	0.61	0.53	0.62	0.75	0.64	0.71	0.32	0.27	0.36	0.89	0.76	0.97	1.02
-5.88	0.25	0.26	0.13	0.6	0.54	0.58	0.68	0.65	0.64	0.32	0.28	0.34	0.91	0.77	0.93	0.78
-6.54	0.25	0.23	0.12	0.57	0.52	0.68	0.71	0.61	0.66	0.32	0.28	0.34	0.85	0.79	1.02	0.82
-7.19	0.24	0.24	0.12	0.59	0.53	0.59	0.69	0.64	0.63	0.32	0.28	0.35	0.95	0.75	0.95	0.77
-7.86	0.25	0.26	0.12	0.53	0.52	0.57	0.65	0.62	0.63	0.32	0.29	0.34	0.92	0.75	0.96	0.79
-8.52	0.19	0.21	0.11	0.37	0.34	0.37	0.4	0.38	0.37	0.25	0.24	0.27	0.84	0.76	1	0.77
-9.14	0.19	0.21	0.11	0.3	0.27	0.31	0.29	0.27	0.31	0.24	0.22	0.26	0.78	0.66	0.77	0.48
-9.83	0.19	0.2	0.11	0.28	0.27	0.3	0.27	0.25	0.28	0.24	0.21	0.26	0.34	0.34	0.32	0.23
-10.51	0.2	0.19	0.09	0.28	0.26	0.3	0.27	0.25	0.28	0.24	0.21	0.25	0.2	0.17	0.2	0.16
-11.19	0.2	0.2	0.1	0.28	0.26	0.31	0.27	0.24	0.28	0.27	0.21	0.26	0.18	0.16	0.19	0.16
-11.92	0.21	0.19	0.11	0.3	0.26	0.32	0.28	0.26	0.28	0.28	0.22	0.27	0.18	0.16	0.19	0.16
KO Gs cells
Log [AVP], M	Mock			Gαq			Gα11			Gα14			Gα15
Vehicle	0.23	0.14	0.29	0.33	0.34	0.36	0.31	0.35	0.36	0.28	0.3	0.3	0.21	0.21	0.22
-5.22	0.34	0.19	0.36	0.61	0.61	0.64	0.69	0.62	0.77	0.34	0.35	0.4	1.08	1.07	1.2
-5.88	0.35	0.2	0.35	0.63	0.62	0.65	0.68	0.61	0.67	0.34	0.35	0.39	1.07	1	1.12
-6.54	0.34	0.19	0.34	0.62	0.57	0.65	0.68	0.65	0.66	0.33	0.34	0.38	1.05	1.04	1.12
-7.19	0.34	0.2	0.35	0.61	0.6	0.64	0.62	0.62	0.66	0.33	0.34	0.39	1.07	1.05	1.15
-7.86	0.33	0.19	0.34	0.6	0.64	0.61	0.59	0.62	0.66	0.34	0.34	0.38	1.08	1.02	1.21
-8.52	0.27	0.16	0.29	0.42	0.44	0.45	0.41	0.43	0.44	0.29	0.29	0.32	1.14	1.03	1.14
-9.14	0.25	0.15	0.28	0.34	0.38	0.38	0.31	0.34	0.36	0.27	0.26	0.3	0.86	0.83	0.91
-9.83	0.24	0.13	0.27	0.33	0.35	0.36	0.3	0.31	0.35	0.25	0.26	0.29	0.36	0.35	0.4
-10.51	0.22	0.14	0.25	0.33	0.34	0.37	0.3	0.3	0.34	0.25	0.27	0.3	0.23	0.23	0.24
-11.19	0.22	0.14	0.26	0.32	0.34	0.38	0.3	0.32	0.35	0.25	0.28	0.3	0.2	0.2	0.23
-11.92	0.24	0.15	0.27	0.33	0.35	0.36	0.32	0.34	0.36	0.24	0.29	0.31	0.2	0.21	0.22
KO G12/13 cells
Log [AVP], M	Mock			Gαq			Gα11			Gα14			Gα15
Vehicle	0.21	0.21	0.12	0.33	0.33	0.35	0.33	0.32	0.33	0.3	0.3	0.34	0.17	0.19	0.2
-5.22	0.23	0.26	0.13	0.54	0.62	0.61	0.8	0.81	0.69	0.38	0.42	0.4	1.04	1.06	1.07
-5.88	0.22	0.25	0.13	0.52	0.61	0.58	0.76	0.8	0.69	0.37	0.41	0.4	0.83	1.04	1.03
-6.54	0.23	0.26	0.13	0.51	0.6	0.59	0.73	0.76	0.66	0.37	0.41	0.4	0.9	0.99	0.99
-7.19	0.22	0.26	0.12	0.5	0.59	0.56	0.77	0.77	0.64	0.38	0.39	0.43	0.88	1.01	0.98
-7.86	0.21	0.26	0.12	0.49	0.58	0.55	0.71	0.71	0.59	0.37	0.38	0.41	0.89	1.02	1.06
-8.52	0.19	0.22	0.11	0.39	0.41	0.42	0.47	0.45	0.43	0.32	0.31	0.34	0.92	1.01	0.98
-9.14	0.19	0.22	0.11	0.32	0.34	0.35	0.34	0.34	0.33	0.3	0.3	0.32	0.78	0.78	0.63
-9.83	0.19	0.21	0.11	0.32	0.32	0.35	0.32	0.32	0.32	0.31	0.29	0.33	0.34	0.4	0.26
-10.51	0.2	0.22	0.1	0.32	0.32	0.34	0.32	0.3	0.33	0.3	0.29	0.34	0.22	0.23	0.21
-11.19	0.18	0.22	0.1	0.31	0.33	0.35	0.31	0.31	0.33	0.31	0.3	0.34	0.18	0.2	0.19
-11.92	0.21	0.21	0.11	0.31	0.33	0.37	0.3	0.32	0.34	0.33	0.31	0.36	0.2	0.21	0.2
KO Gq/11 cells
Log [AVP], M	Mock			Gαq			Gα11			Gα14			Gα15
Vehicle	0.18	0.11	0.2	0.28	0.32	0.32	0.25	0.27	0.28	0.24	0.26	0.29	0.16	0.16	0.18
-5.22	0.19	0.11	0.2	0.52	0.49	0.54	0.61	0.54	0.55	0.28	0.28	0.31	0.81	0.82	0.89
-5.88	0.17	0.1	0.17	0.5	0.48	0.49	0.58	0.53	0.53	0.28	0.28	0.29	0.8	0.85	0.92
-6.54	0.18	0.1	0.2	0.5	0.45	0.5	0.57	0.47	0.52	0.28	0.28	0.28	0.74	0.81	0.82
-7.19	0.18	0.11	0.19	0.51	0.43	0.51	0.61	0.48	0.55	0.29	0.27	0.29	0.76	0.78	0.88
-7.86	0.18	0.1	0.2	0.48	0.44	0.5	0.57	0.46	0.53	0.28	0.26	0.3	0.84	0.79	0.9
-8.52	0.18	0.11	0.19	0.34	0.36	0.36	0.36	0.32	0.36	0.24	0.25	0.27	0.8	0.74	0.92
-9.14	0.18	0.11	0.2	0.28	0.31	0.32	0.27	0.28	0.29	0.24	0.25	0.26	0.69	0.58	0.68
-9.83	0.18	0.1	0.2	0.27	0.3	0.31	0.26	0.26	0.27	0.24	0.25	0.25	0.32	0.27	0.32
-10.51	0.18	0.11	0.18	0.27	0.29	0.32	0.26	0.27	0.27	0.24	0.23	0.27	0.19	0.18	0.2
-11.19	0.19	0.12	0.2	0.28	0.31	0.32	0.26	0.26	0.28	0.25	0.25	0.26	0.17	0.16	0.19
-11.92	0.17	0.12	0.22	0.28	0.35	0.32	0.26	0.29	0.28	0.25	0.26	0.28	0.16	0.16	0.19
KO Gi/o cells
Log [AVP], M	Mock			Gαq			Gα11			Gα14			Gα15
Vehicle	0.18	0.11	0.09	0.23	0.22	0.24	0.21	0.21	0.24	0.19	0.2	0.21	0.13	0.14	0.13
-5.22	0.19	0.13	0.1	0.4	0.36	0.42	0.42	0.45	0.5	0.23	0.28	0.25	0.65	0.72	0.71
-5.88	0.2	0.12	0.1	0.4	0.4	0.43	0.42	0.43	0.51	0.23	0.25	0.26	0.65	0.69	0.67
-6.54	0.2	0.12	0.1	0.4	0.39	0.44	0.45	0.46	0.51	0.23	0.25	0.26	0.64	0.69	0.65
-7.19	0.19	0.11	0.1	0.41	0.4	0.43	0.46	0.49	0.51	0.24	0.26	0.26	0.63	0.7	0.73
-7.86	0.21	0.11	0.1	0.39	0.41	0.45	0.44	0.45	0.51	0.25	0.26	0.26	0.64	0.64	0.68
-8.52	0.18	0.12	0.09	0.28	0.3	0.33	0.29	0.3	0.35	0.2	0.23	0.23	0.63	0.67	0.67
-9.14	0.18	0.11	0.1	0.24	0.26	0.27	0.22	0.25	0.26	0.18	0.22	0.21	0.5	0.41	0.58
-9.83	0.19	0.11	0.09	0.24	0.26	0.26	0.21	0.23	0.24	0.18	0.21	0.2	0.2	0.21	0.24
-10.51	0.17	0.11	0.09	0.23	0.26	0.25	0.22	0.24	0.24	0.19	0.21	0.2	0.15	0.16	0.15
-11.19	0.17	0.1	0.1	0.23	0.25	0.26	0.22	0.24	0.25	0.19	0.21	0.21	0.14	0.15	0.14
-11.92	0.2	0.11	0.09	0.23	0.26	0.27	0.23	0.25	0.24	0.2	0.23	0.22	0.15	0.15	0.14
Figure supplement 1E; EP3: Rap1GAP-RlucII/rGFP-CAAX + Gαi/o
Parental cells
Log [PGE2], M	Mock			Gαi1			Gαi2			GαoA			GαoB			Gαz
Vehicle	0.09	0.06	0.07	0.16	0.17	0.21	0.33	0.31	0.4	0.2	0.19	0.23	0.29	0.28	0.4	0.73	0.72	0.89
-5.22	0.21	0.1	0.1	0.99	0.8	1.21	1.34	0.95	1.41	0.62	0.49	0.62	1.19	0.93	1.38	1.31	1.14	1.46
-5.88	0.25	0.1	0.09	0.94	0.8	1.07	1.17	0.95	1.24	0.61	0.51	0.62	1.14	0.94	1.23	1.24	1.11	1.39
-6.54	0.23	0.09	0.1	0.93	0.85	1.04	1.08	0.9	1.18	0.61	0.54	0.66	1.18	0.93	1.18	1.28	1.09	1.4
-7.19	0.23	0.1	0.1	0.93	0.76	1.05	1.12	0.9	1.22	0.6	0.49	0.62	1.21	0.9	1.24	1.32	1.14	1.44
-7.86	0.23	0.09	0.1	0.93	0.79	1.03	1.11	0.89	1.17	0.59	0.49	0.6	1.13	0.94	1.29	1.28	1.1	1.47
-8.52	0.23	0.09	0.1	0.84	0.71	0.99	1.06	0.8	1.12	0.56	0.49	0.54	1.13	0.87	1.22	1.26	1.1	1.39
-9.14	0.2	0.09	0.1	0.69	0.59	0.77	0.96	0.66	0.83	0.49	0.41	0.46	0.86	0.68	0.9	1.26	1.11	1.39
-9.83	0.17	0.08	0.09	0.35	0.33	0.42	0.51	0.46	0.59	0.32	0.28	0.29	0.49	0.43	0.53	1.15	1.04	1.27
-10.51	0.12	0.07	0.07	0.21	0.22	0.27	0.37	0.36	0.47	0.25	0.21	0.24	0.38	0.33	0.41	1.05	0.89	1.13
-11.19	0.1	0.06	0.07	0.17	0.18	0.22	0.32	0.31	0.45	0.21	0.2	0.24	0.35	0.31	0.39	0.88	0.81	1.06
-11.92	0.09	0.06	0.07	0.17	0.18	0.22	0.31	0.31	0.38	0.2	0.2	0.24	0.33	0.3	0.38	0.81	0.8	0.98
KO Gs cells
Log [PGE2], M	Mock			Gαi1			Gαi2			GαoA			GαoB			Gαz
Vehicle	0.07	0.07	0.11	0.23	0.21	0.19	0.45	0.46	0.47	0.29	0.26	0.25	0.46	0.44	0.374	1.07	1.26	1.26	1.341	1.4
-5.22	0.13	0.12	0.3	1.14	1.06	1.11	1.32	1.52	1.42	0.79	0.72	0.66	1.52	1.58	1.328	1.6	1.78	1.91	1.872	1.852
-5.88	0.14	0.12	0.31	1.21	1.15	1.07	1.31	1.51	1.46	0.8	0.73	0.75	1.61	1.64	1.425	1.64	1.87	1.91	1.798	1.928
-6.54	0.14	0.13	0.34	1.12	1.07	1.01	1.33	1.47	1.31	0.78	0.77	0.69	1.51	1.51	1.469	1.6	1.87	1.82	1.785	1.872
-7.19	0.14	0.13	0.32	1.09	1.04	1.08	1.41	1.41	1.45	0.75	0.74	0.74	1.59	1.7	1.323	1.58	1.88	2.1	1.81	1.761
-7.86	0.12	0.12	0.3	1.13	1.11	1.06	1.38	1.46	1.43	0.74	0.73	0.71	1.56	1.54	1.262	1.66	1.81	2.02	1.801	1.847
-8.52	0.13	0.13	0.32	1.03	0.98	0.93	1.3	1.37	1.38	0.69	0.69	0.66	1.47	1.43	1.34	1.62	1.95	1.93	1.847	1.847
-9.14	0.12	0.12	0.26	0.78	0.74	0.75	1.1	1.14	1.25	0.6	0.57	0.6	1.12	1.23	1.051	1.59	1.83	1.98	1.845	1.735
-9.83	0.1	0.1	0.21	0.46	0.44	0.46	0.77	0.77	0.8	0.41	0.39	0.41	0.69	0.68	0.605	1.44	1.77	1.72	1.713	1.676
-10.51	0.08	0.08	0.15	0.27	0.27	0.25	0.51	0.53	0.53	0.29	0.28	0.3	0.52	0.51	0.434	1.32	1.46	1.57	1.46	1.427
-11.19	0.08	0.07	0.15	0.22	0.2	0.21	0.42	0.45	0.42	0.28	0.27	0.28	0.49	0.46	0.392	1.17	1.23	1.3	1.36	1.354
-11.92	0.07	0.07	0.12	0.22	0.21	0.21	0.42	0.43	0.41	0.27	0.26	0.27	0.46	0.49	0.365	1.17	1.18	1.3	1.369	1.424
KO G12/13 cells
Log [PGE2], M	Mock			Gαi1			Gαi2			GαoA			GαoB			Gαz
Vehicle	0.1	0.06	0.07	0.21	0.23	0.28	0.34	0.48	0.51	0.21	0.22	0.25	0.32	0.39	0.45	0.96	1.12	1.26
-5.22	0.2	0.1	0.11	1.12	1.1	1.26	1.01	1.31	1.38	0.64	0.67	0.84	0.92	1.06	1.44	1.54	1.53	1.69
-5.88	0.21	0.11	0.1	0.97	1.09	1.31	1.09	1.31	1.3	0.61	0.65	0.75	0.94	1.12	1.32	1.45	1.49	1.63
-6.54	0.23	0.11	0.1	0.91	1.14	1.22	1	1.16	1.37	0.58	0.66	0.64	1.07	1.11	1.38	1.44	1.57	1.54
-7.19	0.22	0.11	0.1	0.92	1.16	1.12	0.97	1.38	1.27	0.61	0.66	0.65	0.96	1.16	1.26	1.37	1.63	1.51
-7.86	0.22	0.11	0.1	0.95	1.13	1.11	1	1.23	1.24	0.55	0.68	0.66	1	1.13	1.21	1.44	1.53	1.55
-8.52	0.21	0.1	0.09	0.89	1.07	1	0.94	1.27	1.1	0.57	0.66	0.62	0.93	1.05	1.16	1.44	1.53	1.58
-9.14	0.2	0.1	0.09	0.69	0.92	0.83	0.8	1.09	1.01	0.48	0.55	0.52	0.79	1.03	1	1.35	1.54	1.51
-9.83	0.15	0.09	0.08	0.44	0.49	0.47	0.59	0.68	0.76	0.31	0.35	0.37	0.46	0.5	0.65	1.26	1.41	1.54
-10.51	0.13	0.07	0.08	0.26	0.31	0.35	0.43	0.57	0.59	0.23	0.28	0.29	0.39	0.43	0.61	1.16	1.31	1.49
-11.19	0.1	0.06	0.08	0.24	0.26	0.3	0.36	0.51	0.62	0.22	0.26	0.24	0.35	0.39	0.5	1.05	1.17	1.37
-11.92	0.1	0.06	0.07	0.22	0.25	0.33	0.38	0.51	0.51	0.21	0.26	0.26	0.34	0.39	0.5	1.08	1.2	1.31
KO Gq/11 cells
Log [PGE2], M	Mock			Gαi1			Gαi2			GαoA			GαoB				Gαz
Vehicle	0.05	0.07	0.06	0.14	0.19	0.15	0.27	0.33	0.28	0.17	0.2	0.16	0.25	0.41	0.374	0.381	0.66	0.91	0.72
-5.22	0.07	0.08	0.07	0.84	0.92	0.83	0.96	1.12	0.96	0.49	0.47	0.42	0.96	1.2	1.11	1.134	1.12	1.3	1.27
-5.88	0.07	0.09	0.07	0.81	0.92	0.85	0.97	1	0.88	0.51	0.46	0.46	0.96	1.06	1.105	1.072	1.15	1.17	1.23
-6.54	0.07	0.09	0.08	0.83	0.96	0.82	0.94	0.89	0.9	0.51	0.44	0.43	1.02	0.96	1.088	1.048	1.08	1.16	1.28
-7.19	0.07	0.08	0.07	0.86	0.92	0.88	0.96	0.91	0.87	0.52	0.43	0.45	1.01	0.93	1.112	1.122	1.09	1.18	1.22
-7.86	0.07	0.09	0.07	0.86	0.92	0.82	0.93	0.86	0.82	0.51	0.44	0.41	1.05	1.02	1.066	1.134	1.11	1.17	1.19
-8.52	0.07	0.08	0.07	0.83	0.76	0.74	0.91	0.8	0.76	0.48	0.42	0.4	0.97	0.87	1.059	1.047	1.1	1.16	1.25
-9.14	0.07	0.08	0.07	0.58	0.69	0.64	0.66	0.63	0.67	0.38	0.35	0.34	0.62	0.69	0.842	0.88	1.1	1.08	1.23
-9.83	0.06	0.08	0.07	0.27	0.34	0.29	0.4	0.44	0.4	0.24	0.23	0.22	0.39	0.47	0.523	0.586	1	1.06	1.01
-10.51	0.05	0.07	0.06	0.17	0.24	0.17	0.32	0.38	0.29	0.19	0.2	0.16	0.31	0.43	0.447	0.456	0.91	0.99	0.84
-11.19	0.05	0.07	0.06	0.15	0.22	0.16	0.31	0.37	0.28	0.18	0.21	0.16	0.31	0.41	0.425	0.406	0.76	1	0.68
-11.92	0.05	0.07	0.06	0.15	0.2	0.15	0.3	0.35	0.27	0.18	0.19	0.15	0.3	0.38	0.372	0.378	0.76	0.91	0.63
KO Gi/o cells
Log [PGE2], M	Mock			Gαi1			Gαi2			GαoA			GαoB			Gαz
Vehicle	0.05	0.07	0.05	0.13	0.15	0.14	0.24	0.27	0.24	0.13	0.16	0.14	0.25	0.27	0.239	0.55	0.65	0.55
-5.22	0.06	0.07	0.06	0.61	0.66	0.6	0.74	0.75	0.67	0.32	0.52	0.34	0.8	0.91	0.719	0.81	0.96	0.83
-5.88	0.06	0.07	0.06	0.65	0.67	0.59	0.79	0.72	0.64	0.34	0.44	0.36	0.73	0.8	0.822	0.81	0.96	0.9
-6.54	0.06	0.07	0.06	0.65	0.66	0.58	0.84	0.76	0.7	0.38	0.47	0.34	0.79	0.84	0.735	0.82	0.92	0.88
-7.19	0.06	0.07	0.06	0.65	0.61	0.57	0.76	0.76	0.76	0.36	0.42	0.34	0.7	0.8	0.772	0.83	0.95	0.84
-7.86	0.06	0.07	0.06	0.64	0.56	0.56	0.69	0.71	0.67	0.35	0.39	0.34	0.72	0.7	0.737	0.84	0.95	0.9
-8.52	0.06	0.07	0.06	0.51	0.51	0.46	0.61	0.67	0.57	0.32	0.37	0.31	0.58	0.59	0.694	0.84	0.97	0.91
-9.14	0.06	0.07	0.06	0.31	0.37	0.29	0.43	0.52	0.44	0.24	0.28	0.24	0.44	0.45	0.505	0.8	0.92	0.85
-9.83	0.06	0.07	0.06	0.18	0.21	0.17	0.31	0.38	0.31	0.17	0.2	0.18	0.29	0.36	0.355	0.72	0.85	0.74
-10.51	0.06	0.07	0.06	0.14	0.18	0.15	0.27	0.34	0.28	0.15	0.17	0.15	0.28	0.32	0.264	0.69	0.76	0.62
-11.19	0.06	0.07	0.06	0.15	0.17	0.14	0.27	0.31	0.25	0.16	0.18	0.15	0.28	0.32	0.248	0.64	0.74	0.58
-11.92	0.06	0.08	0.06	0.15	0.17	0.16	0.28	0.29	0.27	0.15	0.18	0.14	0.26	0.31	0.244	0.61	0.77	0.67
Figure supplement 1F; EP3: PDZ-RhoGEF-RlucII/rGFP-CAAX + Gα12/13
Parental cells
Log [PGE2], M	Mock			Gα12			Gα13
Vehicle	0.08	0.07	0.08	0.11	0.12	0.11	0.08	0.09	0.1
-5.22	0.09	0.08	0.09	0.18	0.17	0.22	0.31	0.25	0.36
-5.88	0.08	0.09	0.1	0.18	0.17	0.23	0.31	0.24	0.29
-6.54	0.08	0.09	0.1	0.19	0.17	0.21	0.28	0.21	0.28
-7.19	0.09	0.09	0.1	0.19	0.18	0.23	0.31	0.2	0.22
-7.86	0.08	0.09	0.1	0.19	0.2	0.23	0.21	0.17	0.2
-8.52	0.09	0.08	0.09	0.22	0.2	0.24	0.15	0.12	0.14
-9.14	0.08	0.08	0.09	0.22	0.2	0.25	0.11	0.1	0.12
-9.83	0.08	0.09	0.09	0.22	0.22	0.24	0.1	0.1	0.1
-10.51	0.07	0.09	0.08	0.15	0.16	0.22	0.09	0.09	0.11
-11.19	0.07	0.09	0.1	0.13	0.14	0.16	0.09	0.09	0.1
-11.92	0.08	0.08	0.09	0.11	0.13	0.14	0.09	0.09	0.1
KO Gs cells
Log [PGE2], M	Mock			Gα12			Gα13
Vehicle	0.07	0.08	0.07	0.11	0.16	0.1	0.08	0.09	0.08
-5.22	0.08	0.09	0.08	0.19	0.22	0.17	0.15	0.24	0.16
-5.88	0.08	0.09	0.1	0.19	0.23	0.21	0.16	0.21	0.19
-6.54	0.09	0.09	0.08	0.2	0.25	0.19	0.17	0.19	0.18
-7.19	0.09	0.08	0.08	0.19	0.23	0.18	0.15	0.17	0.15
-7.86	0.08	0.08	0.08	0.21	0.24	0.19	0.13	0.13	0.13
-8.52	0.08	0.09	0.09	0.21	0.27	0.2	0.1	0.11	0.1
-9.14	0.08	0.09	0.08	0.21	0.27	0.2	0.1	0.1	0.09
-9.83	0.09	0.09	0.08	0.21	0.26	0.19	0.09	0.09	0.09
-10.51	0.08	0.09	0.08	0.17	0.2	0.18	0.09	0.09	0.08
-11.19	0.08	0.08	0.08	0.14	0.16	0.13	0.09	0.09	0.08
-11.92	0.08	0.08	0.08	0.12	0.14	0.13	0.08	0.09	0.08
KO G12/13 cells
Log [PGE2], M	Mock			Gα12			Gα13
Vehicle	0.07	0.07	0.09	0.09	0.11	0.15	0.08	0.08	0.1
-5.22	0.07	0.08	0.09	0.14	0.19	0.22	0.12	0.17	0.2
-5.88	0.07	0.07	0.09	0.14	0.18	0.21	0.14	0.17	0.19
-6.54	0.07	0.08	0.1	0.16	0.17	0.22	0.12	0.18	0.17
-7.19	0.07	0.08	0.11	0.15	0.17	0.2	0.12	0.14	0.17
-7.86	0.07	0.08	0.1	0.13	0.19	0.19	0.11	0.11	0.15
-8.52	0.08	0.08	0.09	0.17	0.19	0.21	0.09	0.1	0.12
-9.14	0.07	0.08	0.09	0.16	0.22	0.28	0.09	0.09	0.11
-9.83	0.07	0.08	0.1	0.15	0.22	0.24	0.08	0.09	0.11
-10.51	0.07	0.07	0.09	0.11	0.16	0.16	0.08	0.09	0.1
-11.19	0.07	0.07	0.1	0.11	0.13	0.15	0.08	0.09	0.1
-11.92	0.08	0.07	0.09	0.11	0.12	0.15	0.08	0.08	0.1
KO Gq/11 cells
Log [PGE2], M	Mock				Gα12				Gα13
Vehicle	0.07	0.07	0.09	0.07	0.1	0.1	0.13	0.1	0.08	0.09	0.08
-5.22	0.08	0.08	0.09	0.08	0.13	0.15	0.21	0.14	0.26	0.3	0.26
-5.88	0.07	0.08	0.1	0.08	0.14	0.15	0.21	0.15	0.26	0.28	0.22
-6.54	0.09	0.08	0.1	0.09	0.15	0.17	0.18	0.16	0.22	0.28	0.24
-7.19	0.08	0.08	0.09	0.08	0.16	0.17	0.19	0.16	0.17	0.24	0.2
-7.86	0.08	0.08	0.09	0.08	0.15	0.18	0.2	0.17	0.14	0.17	0.16
-8.52	0.08	0.08	0.09	0.08	0.16	0.2	0.22	0.17	0.11	0.13	0.12
-9.14	0.08	0.08	0.1	0.08	0.18	0.21	0.21	0.2	0.1	0.11	0.09
-9.83	0.08	0.08	0.09	0.08	0.16	0.2	0.22	0.19	0.09	0.1	0.08
-10.51	0.08	0.07	0.09	0.08	0.14	0.16	0.17	0.15	0.09	0.1	0.08
-11.19	0.08	0.07	0.09	0.08	0.12	0.13	0.16	0.12	0.08	0.11	0.09
-11.92	0.07	0.08	0.09	0.08	0.11	0.13	0.17	0.1	0.08	0.1	0.07
KO Gi/o cells
Log [PGE2], M	Mock			Gα12			Gα13
Vehicle	0.07	0.08	0.07	0.12	0.12	0.11	0.08	0.09	0.08
-5.22	0.08	0.08	0.09	0.15	0.16	0.15	0.13	0.13	0.13
-5.88	0.08	0.09	0.08	0.15	0.16	0.15	0.15	0.13	0.11
-6.54	0.08	0.09	0.07	0.16	0.17	0.14	0.13	0.13	0.11
-7.19	0.08	0.08	0.08	0.18	0.15	0.16	0.11	0.12	0.1
-7.86	0.08	0.08	0.08	0.18	0.16	0.17	0.1	0.11	0.1
-8.52	0.08	0.08	0.08	0.19	0.16	0.17	0.1	0.1	0.08
-9.14	0.08	0.08	0.07	0.18	0.16	0.17	0.08	0.09	0.08
-9.83	0.07	0.08	0.07	0.18	0.17	0.16	0.09	0.08	0.08
-10.51	0.08	0.08	0.07	0.16	0.14	0.13	0.08	0.09	0.08
-11.19	0.08	0.08	0.08	0.14	0.14	0.12	0.08	0.08	0.08
-11.92	0.07	0.08	0.08	0.11	0.12	0.11	0.09	0.09	0.08
Figure supplement 1G; M3: Rap1GAP-RlucII/rGFP-CAAX + Gαi/o
Parental cells
Log [Acetylcholine], M	Mock			Gαi1			Gαi2			GαoA			GαoB			Gαz
Vehicle	0.09	0.06	0.07	0.21	0.21	0.22	0.42	0.39	0.43	0.23	0.22	0.22	0.38	0.35	0.4	0.39	0.48	0.47
-4.22	0.26	0.12	0.15	0.78	0.61	0.81	0.85	0.72	0.89	0.42	0.4	0.39	0.85	0.69	0.82	1.14	1	1.32
-4.88	0.24	0.13	0.12	0.67	0.53	0.69	0.72	0.65	0.71	0.41	0.38	0.36	0.78	0.64	0.67	1.03	0.94	1.16
-5.54	0.2	0.11	0.1	0.45	0.42	0.52	0.6	0.5	0.6	0.34	0.34	0.3	0.6	0.49	0.56	0.83	0.81	1.03
-6.19	0.2	0.1	0.09	0.35	0.31	0.32	0.48	0.43	0.47	0.28	0.27	0.26	0.49	0.41	0.47	0.72	0.7	0.9
-6.86	0.15	0.09	0.09	0.27	0.25	0.28	0.45	0.39	0.42	0.25	0.25	0.23	0.43	0.38	0.46	0.62	0.59	0.72
-7.52	0.14	0.08	0.08	0.21	0.24	0.24	0.41	0.4	0.42	0.23	0.23	0.25	0.42	0.38	0.45	0.53	0.58	0.71
-8.1	0.11	0.07	0.07	0.22	0.24	0.25	0.39	0.4	0.4	0.24	0.23	0.23	0.41	0.39	0.41	0.49	0.55	0.67
-8.8	0.09	0.06	0.07	0.22	0.23	0.24	0.4	0.39	0.42	0.22	0.23	0.23	0.41	0.37	0.42	0.5	0.55	0.65
-9.49	0.09	0.06	0.06	0.21	0.22	0.23	0.39	0.39	0.42	0.23	0.23	0.22	0.37	0.38	0.42	0.39	0.54	0.61
-10.19	0.08	0.06	0.06	0.21	0.22	0.23	0.4	0.39	0.42	0.24	0.23	0.23	0.37	0.37	0.43	0.45	0.53	0.69
-10.92	0.09	0.06	0.06	0.2	0.22	0.23	0.41	0.4	0.44	0.24	0.23	0.24	0.38	0.37	0.42	0.51	0.5	0.55
KO Gs cells
Log [Acetylcholine], M	Mock			Gαi1			Gαi2			GαoA			GαoB			Gαz
Vehicle	0.1	0.07	0.06	0.21	0.19	0.19	0.47	0.47	0.44	0.25	0.31	0.31	0.4	0.53	0.322	0.5	0.54	0.62
-4.22	0.27	0.15	0.14	0.82	0.92	0.85	1.09	1.23	1.16	0.57	0.73	0.75	1.12	1.35	0.905	1.37	1.39	1.57
-4.88	0.27	0.15	0.15	0.74	0.74	0.83	0.98	1.03	1.02	0.53	0.68	0.63	0.81	1.06	0.876	1.23	1.32	1.55
-5.54	0.23	0.14	0.12	0.55	0.54	0.56	0.77	0.81	0.77	0.43	0.51	0.5	0.73	0.82	0.688	1.02	1.1	1.31
-6.19	0.18	0.11	0.11	0.34	0.31	0.36	0.57	0.57	0.57	0.35	0.38	0.41	0.57	0.63	0.454	0.83	0.92	1.05
-6.86	0.18	0.1	0.09	0.23	0.24	0.26	0.5	0.47	0.45	0.29	0.34	0.35	0.48	0.52	0.382	0.75	0.74	0.8
-7.52	0.16	0.1	0.09	0.2	0.22	0.21	0.46	0.44	0.45	0.28	0.31	0.32	0.46	0.49	0.342	0.68	0.68	0.79
-8.1	0.14	0.09	0.08	0.21	0.19	0.2	0.45	0.44	0.44	0.28	0.29	0.31	0.43	0.47	0.317	0.59	0.61	0.7
-8.8	0.11	0.07	0.07	0.19	0.19	0.17	0.47	0.44	0.42	0.26	0.27	0.3	0.44	0.46	0.308	0.59	0.61	0.69
-9.49	0.09	0.07	0.06	0.19	0.18	0.19	0.42	0.43	0.43	0.24	0.29	0.29	0.45	0.47	0.313	0.55	0.59	0.64
-10.19	0.1	0.07	0.06	0.18	0.18	0.18	0.42	0.45	0.4	0.25	0.29	0.3	0.43	0.46	0.327	0.57	0.51	0.66
-10.92	0.1	0.07	0.06	0.17	0.2	0.19	0.41	0.47	0.44	0.25	0.34	0.29	0.4	0.49	0.306	0.54	0.52	0.6
KO G12/13 cells
Log [Acetylcholine], M	Mock			Gαi1			Gαi2			GαoA			GαoB			Gαz
Vehicle	0.1	0.06	0.07	0.26	0.25	0.28	0.48	0.52	0.55	0.23	0.25	0.24	0.6	0.38	0.47	0.7	0.63	0.75
-4.22	0.22	0.11	0.13	0.76	0.94	1.05	1.01	0.97	1.04	0.39	0.45	0.45	0.92	0.83	0.84	1.26	1.31	1.4
-4.88	0.21	0.11	0.11	0.63	0.78	0.71	0.8	0.88	0.84	0.39	0.41	0.4	0.77	0.7	0.83	1.11	1.16	1.34
-5.54	0.19	0.1	0.1	0.53	0.52	0.55	0.65	0.69	0.7	0.34	0.36	0.34	0.65	0.58	0.67	1.01	1.06	1.17
-6.19	0.18	0.08	0.09	0.35	0.39	0.39	0.55	0.58	0.62	0.28	0.27	0.27	0.5	0.51	0.59	0.84	0.92	1.08
-6.86	0.13	0.08	0.09	0.27	0.33	0.33	0.53	0.6	0.59	0.26	0.27	0.26	0.46	0.49	0.51	0.72	0.78	1.07
-7.52	0.12	0.07	0.08	0.25	0.31	0.33	0.48	0.57	0.54	0.25	0.25	0.25	0.41	0.47	0.55	0.7	0.8	1.04
-8.1	0.1	0.06	0.07	0.25	0.31	0.3	0.48	0.57	0.56	0.25	0.26	0.25	0.39	0.47	0.54	0.66	0.78	0.95
-8.8	0.09	0.06	0.07	0.25	0.3	0.28	0.48	0.55	0.56	0.24	0.25	0.26	0.43	0.49	0.53	0.71	0.73	0.99
-9.49	0.09	0.06	0.07	0.26	0.29	0.32	0.48	0.58	0.57	0.24	0.26	0.25	0.43	0.5	0.52	0.7	0.73	0.99
-10.19	0.09	0.06	0.07	0.24	0.28	0.3	0.49	0.59	0.58	0.23	0.25	0.25	0.44	0.46	0.48	0.63	0.69	0.92
-10.92	0.09	0.06	0.07	0.25	0.25	0.29	0.47	0.58	0.58	0.24	0.24	0.23	0.42	0.45	0.47	0.61	0.64	0.8
KO Gq/11 cells
Log [Acetylcholine], M	Mock			Gαi1			Gαi2			GαoA			GαoB			Gαz
Vehicle	0.09	0.05	0.07	0.2	0.21	0.23	0.37	0.43	0.37	0.21	0.21	0.22	0.29	0.34	0.39	0.62	0.45	0.5
-4.22	0.15	0.07	0.08	0.61	0.77	0.73	0.72	0.83	0.73	0.33	0.35	0.33	0.64	0.75	0.84	1.24	1.08	1.11
-4.88	0.14	0.07	0.08	0.52	0.68	0.63	0.55	0.77	0.62	0.32	0.36	0.33	0.6	0.68	0.69	1.08	1.04	1.02
-5.54	0.13	0.06	0.08	0.41	0.5	0.45	0.54	0.61	0.53	0.28	0.3	0.28	0.49	0.53	0.6	0.93	0.87	0.93
-6.19	0.12	0.06	0.07	0.29	0.31	0.3	0.43	0.5	0.42	0.24	0.25	0.23	0.43	0.4	0.48	0.85	0.69	0.81
-6.86	0.1	0.06	0.07	0.24	0.23	0.25	0.4	0.43	0.43	0.22	0.22	0.23	0.37	0.36	0.48	0.78	0.52	0.77
-7.52	0.11	0.05	0.07	0.21	0.21	0.25	0.39	0.42	0.39	0.21	0.21	0.22	0.37	0.36	0.46	0.74	0.5	0.74
-8.1	0.09	0.05	0.07	0.22	0.21	0.27	0.38	0.44	0.4	0.21	0.21	0.22	0.35	0.38	0.46	0.69	0.48	0.66
-8.8	0.1	0.05	0.07	0.21	0.21	0.25	0.37	0.44	0.4	0.21	0.22	0.21	0.38	0.36	0.4	0.69	0.49	0.66
-9.49	0.1	0.05	0.07	0.23	0.21	0.24	0.36	0.44	0.41	0.21	0.21	0.22	0.35	0.37	0.42	0.71	0.48	0.68
-10.19	0.1	0.05	0.07	0.22	0.21	0.25	0.35	0.44	0.4	0.22	0.22	0.22	0.39	0.36	0.43	0.66	0.45	0.63
-10.92	0.09	0.05	0.09	0.21	0.21	0.25	0.35	0.42	0.39	0.21	0.22	0.21	0.34	0.36	0.43	0.62	0.44	0.67
KO Gi/o cells
Log [Acetylcholine], M	Mock			Gαi1			Gαi2			GαoA			GαoB			Gαz
Vehicle	0.06	0.06	0.06	0.16	0.16	0.24	0.28	0.36	0.33	0.16	0.17	0.18	0.28	0.31	0.264	0.46	0.5	0.46
-4.22	0.08	0.07	0.07	0.35	0.39	0.41	0.45	0.51	0.45	0.24	0.27	0.27	0.46	0.53	0.422	0.66	0.74	0.66
-4.88	0.08	0.07	0.07	0.31	0.38	0.38	0.41	0.47	0.45	0.23	0.27	0.26	0.42	0.47	0.393	0.66	0.73	0.6
-5.54	0.08	0.08	0.07	0.26	0.3	0.29	0.36	0.42	0.39	0.21	0.23	0.25	0.36	0.4	0.357	0.64	0.68	0.56
-6.19	0.07	0.08	0.07	0.2	0.24	0.25	0.31	0.37	0.34	0.18	0.22	0.22	0.37	0.41	0.319	0.58	0.65	0.53
-6.86	0.08	0.07	0.07	0.19	0.21	0.23	0.32	0.36	0.31	0.17	0.2	0.2	0.34	0.37	0.306	0.6	0.64	0.49
-7.52	0.07	0.08	0.07	0.18	0.2	0.22	0.3	0.35	0.32	0.17	0.19	0.18	0.35	0.36	0.298	0.57	0.61	0.49
-8.1	0.07	0.07	0.06	0.18	0.19	0.21	0.3	0.33	0.33	0.17	0.18	0.19	0.35	0.35	0.283	0.54	0.59	0.43
-8.8	0.07	0.07	0.06	0.18	0.19	0.21	0.31	0.36	0.34	0.17	0.18	0.17	0.34	0.37	0.298	0.58	0.63	0.54
-9.49	0.08	0.07	0.06	0.19	0.2	0.22	0.31	0.38	0.36	0.17	0.18	0.18	0.35	0.38	0.303	0.58	0.61	0.53
-10.19	0.08	0.07	0.06	0.18	0.19	0.22	0.3	0.34	0.33	0.16	0.18	0.17	0.34	0.36	0.28	0.57	0.6	0.52
-10.92	0.08	0.07	0.06	0.19	0.18	0.2	0.31	0.33	0.31	0.15	0.18	0.17	0.34	0.39	0.303	0.57	0.57	0.45
Figure supplement 1H; M3: p63-RhoGEF-RlucII/rGFP-CAAX + Gαq/11
Parental cells
Log [Acetylcholine], M	Mock			Gαq			Gα11			Gα14			Gα15
Vehicle	0.14	0.13	0.1	0.22	0.19	0.25	0.22	0.2	0.23	0.21	0.17	0.22	0.13	0.12	0.15
-4.22	0.52	0.48	0.23	1.46	1.05	1.46	1.71	1.23	1.7	1.47	1.08	1.77	0.83	0.79	1.03
-4.88	0.48	0.47	0.2	1.36	1.11	1.39	1.64	1.28	1.59	1.44	1.07	1.53	0.86	0.72	0.97
-5.54	0.46	0.45	0.21	1.37	1.04	1.41	1.55	1.2	1.56	1.46	1.08	1.4	0.85	0.75	0.93
-6.19	0.46	0.41	0.19	1.3	1.01	1.34	1.55	1.2	1.47	1.44	1.01	1.39	0.84	0.7	0.92
-6.86	0.38	0.31	0.18	1.03	0.81	1.09	1.4	1.03	1.29	1.27	0.86	1.29	0.81	0.67	0.94
-7.52	0.28	0.22	0.14	0.71	0.53	0.76	0.98	0.65	0.95	0.85	0.59	0.92	0.61	0.51	0.69
-8.1	0.19	0.18	0.11	0.43	0.34	0.45	0.52	0.41	0.49	0.49	0.38	0.56	0.32	0.32	0.38
-8.8	0.15	0.15	0.1	0.28	0.23	0.28	0.3	0.24	0.29	0.28	0.22	0.29	0.18	0.16	0.2
-9.49	0.15	0.15	0.09	0.23	0.2	0.25	0.23	0.21	0.23	0.22	0.18	0.22	0.14	0.13	0.16
-10.19	0.14	0.14	0.1	0.22	0.19	0.24	0.22	0.21	0.23	0.2	0.18	0.21	0.14	0.13	0.15
-10.92	0.15	0.14	0.09	0.23	0.19	0.24	0.23	0.21	0.23	0.22	0.18	0.23	0.14	0.13	0.15
KO Gs cells
Log [Acetylcholine], M	Mock						Gαq			Gα11			Gα14			Gα15
Vehicle	0.2	0.17	0.09	0.125	0.196	0.182	0.23	0.23	0.23	0.23	0.21	0.22	0.24	0.22	0.22	0.17	0.17	0.15
-4.22	0.51	0.62	0.24	0.257	0.77	0.633	1.19	1.42	1.26	1.26	1.27	1.2	1.5	1.52	1.28	0.87	1.04	0.98
-4.88	0.48	0.59	0.25	0.279	0.728	0.661	1.15	1.39	1.26	1.09	1.15	1.16	1.35	1.47	1.32	0.95	1.04	1.01
-5.54	0.43	0.62	0.26	0.286	0.718	0.66	1.13	1.35	1.22	1.1	1.15	1.11	1.3	1.47	1.26	0.94	1.05	1.04
-6.19	0.45	0.57	0.25	0.258	0.699	0.648	1.1	1.25	1.25	1.06	1.16	1.08	1.29	1.33	1.28	0.96	1.05	1.05
-6.86	0.38	0.46	0.23	0.282	0.611	0.53	0.97	1.16	1.12	0.96	1.01	1.04	1.13	1.24	1.13	0.94	1.04	1
-7.52	0.27	0.33	0.19	0.216	0.401	0.407	0.69	0.82	0.82	0.66	0.8	0.81	0.83	0.91	0.93	0.78	0.77	0.84
-8.1	0.26	0.21	0.15	0.182	0.259	0.276	0.47	0.49	0.54	0.49	0.43	0.5	0.6	0.51	0.57	0.53	0.44	0.46
-8.8	0.22	0.19	0.12	0.126	0.212	0.197	0.29	0.29	0.28	0.29	0.27	0.26	0.33	0.29	0.3	0.25	0.21	0.21
-9.49	0.19	0.17	0.11	0.124	0.184	0.175	0.24	0.25	0.22	0.25	0.22	0.2	0.26	0.23	0.23	0.21	0.17	0.17
-10.19	0.19	0.16	0.1	0.126	0.193	0.165	0.25	0.22	0.22	0.24	0.19	0.18	0.25	0.22	0.21	0.19	0.16	0.17
-10.92	0.22	0.17	0.11	0.135	0.21	0.181	0.25	0.23	0.23	0.24	0.2	0.2	0.26	0.23	0.22	0.19	0.16	0.18
KO G12/13 cells
Log [Acetylcholine], M	Mock			Gαq			Gα11			Gα14			Gα15
Vehicle	0.13	0.16	0.09	0.23	0.26	0.27	0.24	0.26	0.26	0.22	0.24	0.29	0.14	0.15	0.16
-4.22	0.39	0.54	0.21	1.26	1.42	1.54	1.48	1.64	1.75	1.56	1.53	1.68	0.82	0.91	1.1
-4.88	0.4	0.52	0.19	1.09	1.43	1.36	1.4	1.63	1.45	1.4	1.66	1.6	0.84	1.01	1.12
-5.54	0.39	0.52	0.19	1.07	1.37	1.39	1.3	1.58	1.58	1.34	1.55	1.68	0.88	0.99	1.07
-6.19	0.35	0.5	0.18	0.97	1.32	1.26	1.32	1.49	1.51	1.3	1.49	1.63	0.85	0.99	1.07
-6.86	0.28	0.4	0.16	0.8	1.08	1.08	1.17	1.31	1.28	1.16	1.29	1.41	0.82	0.88	1.07
-7.52	0.2	0.28	0.13	0.54	0.73	0.64	0.76	0.9	0.76	0.73	0.91	0.85	0.54	0.64	0.65
-8.1	0.17	0.21	0.11	0.34	0.47	0.41	0.39	0.53	0.44	0.42	0.56	0.53	0.3	0.38	0.34
-8.8	0.14	0.18	0.1	0.26	0.29	0.3	0.28	0.31	0.3	0.29	0.31	0.34	0.18	0.2	0.21
-9.49	0.15	0.16	0.1	0.23	0.27	0.27	0.24	0.27	0.26	0.23	0.27	0.28	0.16	0.17	0.19
-10.19	0.15	0.17	0.1	0.22	0.26	0.26	0.24	0.25	0.25	0.23	0.26	0.28	0.15	0.15	0.18
-10.92	0.13	0.15	0.1	0.25	0.27	0.28	0.23	0.27	0.27	0.22	0.27	0.29	0.15	0.16	0.17
KO Gq/11 cells
Log [Acetylcholine], M	Mock			Gαq			Gα11			Gα14			Gα15
Vehicle	0.14	0.1	0.07	0.23	0.22	0.23	0.22	0.21	0.23	0.2	0.21	0.23	0.13	0.13	0.13
-4.22	0.15	0.11	0.08	1.18	0.99	1.08	1.28	1.23	1.12	1.19	1.02	0.99	0.72	0.75	0.73
-4.88	0.14	0.1	0.07	1.18	0.97	1.05	1.33	1.24	1.15	1.2	1.02	1.06	0.7	0.7	0.72
-5.54	0.14	0.11	0.08	1.12	0.95	1	1.34	1.06	1.17	1.16	0.96	1.02	0.74	0.7	0.74
-6.19	0.14	0.1	0.08	1.05	0.86	0.96	1.32	1.03	1.11	1.19	0.97	0.96	0.81	0.75	0.72
-6.86	0.15	0.1	0.08	0.89	0.75	0.79	1.13	0.89	0.99	0.97	0.78	0.85	0.75	0.7	0.75
-7.52	0.14	0.1	0.07	0.62	0.47	0.51	0.76	0.5	0.62	0.67	0.48	0.59	0.61	0.45	0.54
-8.1	0.15	0.1	0.07	0.37	0.36	0.41	0.39	0.36	0.44	0.38	0.36	0.44	0.3	0.3	0.37
-8.8	0.15	0.09	0.08	0.25	0.25	0.27	0.26	0.24	0.26	0.25	0.23	0.28	0.18	0.16	0.18
-9.49	0.14	0.1	0.08	0.23	0.23	0.24	0.23	0.21	0.24	0.21	0.21	0.23	0.15	0.14	0.14
-10.19	0.15	0.11	0.08	0.23	0.22	0.25	0.21	0.21	0.23	0.21	0.2	0.22	0.14	0.14	0.13
-10.92	0.15	0.1	0.08	0.23	0.24	0.28	0.23	0.22	0.24	0.2	0.21	0.23	0.14	0.14	0.14
KO Gi/o cells
Log [Acetylcholine], M	Mock			Gαq			Gα11			Gα14			Gα15
Vehicle	0.15	0.1	0.09	0.17	0.19	0.2	0.16	0.19	0.19	0.16	0.17	0.17	0.1	0.12	0.11
-4.22	0.35	0.18	0.17	0.78	0.73	0.76	0.84	0.98	0.88	0.72	0.9	0.67	0.57	0.7	0.59
-4.88	0.35	0.17	0.16	0.77	0.77	0.86	0.82	0.96	0.88	0.68	0.82	0.7	0.56	0.62	0.58
-5.54	0.34	0.16	0.16	0.71	0.8	0.82	0.84	0.92	0.84	0.73	0.84	0.75	0.57	0.64	0.62
-6.19	0.3	0.17	0.15	0.69	0.77	0.74	0.83	0.98	0.84	0.67	0.84	0.72	0.56	0.63	0.58
-6.86	0.27	0.15	0.14	0.6	0.62	0.69	0.77	0.88	0.72	0.61	0.77	0.66	0.52	0.59	0.55
-7.52	0.22	0.14	0.12	0.45	0.51	0.51	0.54	0.66	0.55	0.46	0.57	0.51	0.37	0.38	0.39
-8.1	0.18	0.12	0.11	0.28	0.35	0.37	0.3	0.36	0.37	0.28	0.42	0.37	0.17	0.28	0.22
-8.8	0.17	0.11	0.09	0.2	0.23	0.24	0.19	0.22	0.23	0.18	0.23	0.23	0.12	0.14	0.14
-9.49	0.15	0.11	0.1	0.18	0.22	0.2	0.17	0.2	0.2	0.17	0.19	0.18	0.11	0.13	0.12
-10.19	0.14	0.11	0.09	0.17	0.19	0.22	0.17	0.19	0.2	0.16	0.17	0.17	0.11	0.12	0.12
-10.92	0.17	0.12	0.09	0.17	0.2	0.22	0.17	0.21	0.21	0.16	0.18	0.18	0.11	0.13	0.12
Figure supplement 1I; D2: Rap1GAP-RlucII/rGFP-CAAX + Mock									Figure supplement 1I; GnRHR: p63-RhoGEF-RlucII/rGFP-CAAX + Mock
Log [Dopamine], M	HEK293 WT			HEK293 ΔGi/o					Log [LH-RH], M	HEK293 WT				HEK293 ΔGq/11
Vehicle	0	0	0	0	0	0			Vehicle	0	0	0	0	0	0	0
-6	111	67	100	0	11	0			-5.22	99	96	94	104	4	0	0
-6.49	122	78	100	11	11	0			-5.88	102	89	94	108	0	-4	0
-6.98	122	67	100	11	11	0			-6.54	93	101	94	100	4	4	-4
-7.46	122	67	89	0	11	0			-7.19	105	101	89	110	4	4	4
-7.95	100	45	67	0	0	0			-7.86	100	108	88	98	0	4	4
-8.44	78	33	45	0	11	-11			-8.52	98	89	83	92	0	-4	-4
-8.93	33	22	22	11	11	0			-9.14	72	64	53	65	0	0	0
-9.42	11	11	11	11	0	0			-9.84	45	27	35	26	0	-4	0
-9.92	11	11	0	0	11	0			-10.52	16	6	13	-1	0	0	0
-10.4	11	0	0	0	11	0			-11.22	3	2	4	-4	0	0	0
-10.89	0	-11	-11	11	11	0			-11.89	5	0	0	-3	0	0	0
