# Supplementary material for: Effector membrane translocation biosensors reveal G protein and βarrestin coupling profiles of 100 therapeutically relevant GPCRs
Source: eLife. 2022 Mar 18;11:e74101. doi: 10.7554/eLife.74101 (PMC9005190; doi:10.7554/eLife.74101)
Supplement: Figure 2—figure supplement 2—source data 1. [file elife-74101-fig2-figsupp2-data1.xlsx]

## Sheet: Figure 2- figure supplement 2
Source data for Figure 2- figure supplement 2
Figure supplement 2A; ETA: Rap1GAP-RlucII/rGFP-CAAX + Gα
Log [Endothelin 1], M	Mock			Rec+Mock			Gq			G11			G14			G15			G12			G13
Vehicle	0.066	0.079	0.081	0.064	0.062	0.066	0.067	0.068	0.07	0.066	0.065	0.07	0.061	0.065	0.071	0.062	0.066	0.068	0.071	0.075	0.078	0.065	0.07	0.066
-7.22	0.068	0.07	0.08	0.128	0.113	0.146	0.15	0.133	0.166	0.152	0.14	0.154	0.132	0.122	0.159	0.104	0.103	0.126	0.09	0.097	0.097	0.085	0.1	0.092
-7.69	0.071	0.078	0.08	0.131	0.119	0.143	0.149	0.132	0.165	0.15	0.133	0.169	0.141	0.12	0.164	0.119	0.109	0.128	0.093	0.1	0.102	0.091	0.096	0.094
-8.15	0.074	0.077	0.087	0.14	0.118	0.143	0.161	0.133	0.165	0.144	0.131	0.168	0.142	0.128	0.16	0.104	0.116	0.13	0.103	0.099	0.103	0.089	0.099	0.091
-8.62	0.075	0.084	0.091	0.147	0.126	0.158	0.159	0.143	0.175	0.158	0.138	0.189	0.156	0.127	0.177	0.108	0.111	0.119	0.097	0.103	0.106	0.101	0.101	0.097
-9.1	0.074	0.084	0.085	0.15	0.124	0.161	0.167	0.14	0.175	0.149	0.131	0.191	0.154	0.129	0.182	0.097	0.106	0.113	0.094	0.096	0.101	0.095	0.097	0.099
-9.55	0.073	0.084	0.082	0.118	0.108	0.144	0.145	0.126	0.149	0.135	0.124	0.154	0.128	0.127	0.164	0.094	0.093	0.102	0.085	0.095	0.095	0.085	0.093	0.091
-10.02	0.075	0.086	0.08	0.084	0.087	0.098	0.09	0.096	0.102	0.089	0.096	0.1	0.085	0.093	0.101	0.075	0.082	0.084	0.081	0.084	0.082	0.074	0.085	0.077
-10.49	0.075	0.092	0.076	0.075	0.078	0.08	0.083	0.082	0.087	0.084	0.079	0.084	0.08	0.08	0.082	0.071	0.079	0.077	0.08	0.079	0.081	0.072	0.078	0.076
-10.92	0.073	0.087	0.074	0.069	0.072	0.077	0.076	0.074	0.079	0.072	0.077	0.075	0.074	0.072	0.077	0.067	0.072	0.069	0.077	0.083	0.081	0.067	0.077	0.072
-11.4	0.072	0.087	0.073	0.066	0.07	0.069	0.072	0.071	0.074	0.073	0.072	0.073	0.068	0.072	0.071	0.066	0.07	0.068	0.075	0.073	0.077	0.071	0.075	0.07
-11.89	0.075	0.09	0.081	0.06	0.075	0.066	0.069	0.075	0.07	0.071	0.08	0.071	0.067	0.074	0.073	0.064	0.077	0.068	0.074	0.079	0.076	0.067	0.076	0.075
Log [Endothelin 1], M	Mock			Rec+Mock			Gi1			Gi2			GoA			GoB			Gz
Vehicle	0.069	0.074	0.076	0.065	0.063	0.066	0.121	0.129	0.145	0.338	0.34	0.492	0.207	0.207	0.307	0.307	0.33	0.427	0.281	0.276	0.415
-7.22	0.075	0.077	0.082	0.135	0.104	0.144	1.2	0.939	1.002	0.908	1.35	1.525	0.759	0.662	0.823	1.572	1.588	1.534	1.67	1.492	1.642
-7.69	0.067	0.075	0.077	0.142	0.112	0.144	1.109	0.837	0.97	1.526	1.251	1.577	0.759	0.627	0.841	1.263	1.352	1.488	1.701	1.456	1.741
-8.15	0.075	0.081	0.086	0.145	0.119	0.156	1.052	0.921	1.073	1.54	1.214	1.631	0.736	0.66	0.883	1.557	1.435	1.588	1.44	1.433	1.818
-8.62	0.081	0.076	0.084	0.148	0.135	0.16	1.001	0.942	1.03	0.947	1.33	1.528	0.602	0.675	0.884	1.631	1.503	1.722	1.451	1.541	1.774
-9.1	0.074	0.073	0.08	0.146	0.126	0.154	0.234	0.813	0.944	0.914	1.247	1.49	0.381	0.709	0.836	0.817	1.411	1.71	1.428	1.501	1.677
-9.55	0.076	0.075	0.083	0.11	0.11	0.141	0.122	0.652	0.696	0.324	1.111	1.378	0.617	0.6	0.736	0.327	1.328	1.453	0.299	1.472	1.766
-10.02	0.073	0.069	0.079	0.083	0.084	0.096	0.338	0.349	0.408	0.772	0.736	0.898	0.488	0.483	0.591	1.008	1.038	1.175	1.563	1.425	1.624
-10.49	0.073	0.078	0.074	0.074	0.074	0.08	0.212	0.209	0.257	0.532	0.516	0.59	0.352	0.341	0.44	0.717	0.815	0.772	1.444	1.297	1.385
-10.92	0.074	0.075	0.079	0.074	0.071	0.076	0.153	0.146	0.177	0.389	0.375	0.441	0.266	0.241	0.334	0.459	0.458	0.531	0.9	0.854	0.925
-11.4	0.069	0.076	0.076	0.07	0.068	0.071	0.14	0.136	0.153	0.391	0.338	0.399	0.228	0.221	0.272	0.412	0.36	0.41	0.558	0.523	0.566
-11.89	0.069	0.074	0.084	0.066	0.064	0.07	0.124	0.133	0.161	0.354	0.354	0.435	0.221	0.228	0.328	0.326	0.361	0.468	0.354	0.385	0.494
No Rec	+ETA
Mock	Mock	Gαq	Gα11	Gα14	Gα15	Gα12	Gα13	Gαi1	Gαi2	GαoA	GαoB	Gαz
0.005254	0.07291	0.08417	0.07893	0.07552	0.04636	0.02216	0.024	0.9486	0.8591	0.7419	0.9977	1.087
0.003417	0.04999	0.06397	0.06227	0.05342	0.03864	0.02244	0.02549	0.7779	0.9462	0.4506	1.153	1.176
0.001	0.07956	0.09521	0.1001	0.09393	0.06112	0.02357	0.02299	0.8698	1.126	0.5609	1.173	1.303
Figure supplement 2B; ETA: p63-RhoGEF-RlucII/rGFP-CAAX + Gα
Log [Endothelin 1], M	Mock			Rec+Mock			Gq			G11			G14			G15			G12			G13
Vehicle	0.128	0.126	0.134	0.122	0.102	0.102	0.155	0.151	0.158	0.186	0.163	0.179	0.167	0.152	0.158	0.114	0.104	0.113	0.134	0.137	0.13	0.117	0.121	0.115
-7.22	0.148	0.153	0.157	0.265	0.213	0.237	0.761	0.718	0.814	1.15	0.951	1.036	0.998	0.973	1.008	0.379	0.329	0.363	0.194	0.2	0.171	0.174	0.193	0.166
-7.69	0.136	0.14	0.144	0.265	0.205	0.23	0.817	0.679	0.778	1.2	0.973	1.023	1.051	0.915	0.981	0.377	0.328	0.358	0.186	0.181	0.171	0.191	0.194	0.178
-8.15	0.142	0.152	0.135	0.265	0.197	0.249	0.924	0.707	0.847	1.296	1.07	1.104	1.131	0.926	1.042	0.327	0.296	0.318	0.191	0.198	0.189	0.211	0.2	0.186
-8.62	0.149	0.147	0.143	0.269	0.234	0.259	0.979	0.809	0.912	1.428	1.16	1.259	1.203	1.083	1.253	0.242	0.238	0.243	0.199	0.196	0.199	0.224	0.212	0.209
-9.1	0.141	0.14	0.147	0.231	0.203	0.246	0.904	0.846	0.889	1.356	1.242	1.253	1.185	1.088	1.172	0.197	0.18	0.196	0.184	0.206	0.172	0.201	0.182	0.194
-9.55	0.152	0.141	0.143	0.161	0.15	0.136	0.584	0.6	0.596	0.748	0.731	0.805	0.76	0.832	0.868	0.161	0.143	0.157	0.167	0.162	0.157	0.171	0.172	0.154
-10.02	0.161	0.142	0.147	0.127	0.121	0.121	0.31	0.315	0.36	0.378	0.373	0.472	0.366	0.456	0.457	0.13	0.125	0.135	0.151	0.158	0.146	0.137	0.137	0.137
-10.49	0.154	0.148	0.142	0.122	0.113	0.108	0.235	0.227	0.261	0.271	0.263	0.299	0.262	0.289	0.311	0.123	0.118	0.119	0.133	0.136	0.145	0.146	0.13	0.131
-10.92	0.144	0.14	0.143	0.12	0.107	0.103	0.195	0.192	0.215	0.236	0.197	0.236	0.226	0.218	0.221	0.12	0.105	0.117	0.154	0.138	0.134	0.147	0.13	0.13
-11.4	0.147	0.144	0.127	0.111	0.106	0.11	0.196	0.177	0.176	0.22	0.191	0.205	0.185	0.184	0.182	0.113	0.109	0.116	0.152	0.148	0.141	0.134	0.121	0.126
-11.89	0.139	0.146	0.15	0.112	0.105	0.095	0.181	0.163	0.172	0.222	0.186	0.191	0.179	0.162	0.17	0.114	0.115	0.112	0.149	0.136	0.137	0.132	0.127	0.128
Log [Endothelin 1], M	Mock			Rec+Mock			Gi1			Gi2			GoA			GoB			Gz
Vehicle	0.136	0.151	0.142	0.111	0.115	0.105	0.123	0.114	0.123	0.121	0.121	0.106	0.142	0.139	0.154	0.113	0.127	0.118	0.123	0.138	0.113
-7.22	0.159	0.152	0.138	0.252	0.245	0.247	0.213	0.168	0.199	0.122	0.127	0.121	0.207	0.184	0.204	0.144	0.143	0.148	0.235	0.226	0.194
-7.69	0.148	0.153	0.131	0.24	0.225	0.249	0.199	0.164	0.195	0.116	0.122	0.116	0.22	0.184	0.212	0.164	0.142	0.15	0.222	0.216	0.205
-8.15	0.149	0.168	0.153	0.241	0.238	0.237	0.203	0.164	0.204	0.128	0.117	0.113	0.205	0.199	0.209	0.154	0.144	0.143	0.239	0.234	0.222
-8.62	0.151	0.148	0.135	0.267	0.231	0.252	0.194	0.174	0.203	0.112	0.12	0.105	0.2	0.198	0.218	0.149	0.149	0.147	0.205	0.211	0.212
-9.1	0.143	0.17	0.136	0.21	0.205	0.215	0.164	0.154	0.17	0.111	0.119	0.107	0.2	0.197	0.207	0.144	0.145	0.149	0.184	0.171	0.172
-9.55	0.148	0.145	0.152	0.14	0.16	0.161	0.138	0.131	0.138	0.108	0.115	0.101	0.207	0.191	0.207	0.146	0.127	0.142	0.161	0.15	0.147
-10.02	0.146	0.142	0.146	0.131	0.124	0.117	0.135	0.118	0.123	0.104	0.105	0.098	0.179	0.169	0.182	0.132	0.125	0.119	0.142	0.136	0.128
-10.49	0.144	0.152	0.145	0.117	0.121	0.113	0.129	0.126	0.122	0.105	0.098	0.1	0.167	0.145	0.166	0.125	0.121	0.124	0.132	0.123	0.122
-10.92	0.145	0.165	0.143	0.113	0.118	0.108	0.133	0.116	0.12	0.112	0.111	0.1	0.151	0.143	0.153	0.127	0.116	0.124	0.124	0.118	0.116
-11.4	0.154	0.144	0.143	0.113	0.111	0.103	0.133	0.124	0.13	0.122	0.111	0.099	0.152	0.145	0.144	0.139	0.121	0.12	0.126	0.12	0.106
-11.89	0.148	0.151	0.134	0.123	0.109	0.104	0.135	0.124	0.118	0.108	0.127	0.101	0.16	0.155	0.146	0.132	0.126	0.119	0.121	0.131	0.113
No Rec	+ETA
Mock	Mock	Gαq	Gα11	Gα14	Gα15	Gα12	Gα13	Gαi1	Gαi2	GαoA	GαoB	Gαz
0.004111	0.1494	0.6872	1.042	0.9121	0.2912	0.04751	0.06489	0.07524	0.01062	0.05757	0.027	0.1134
0.0011	0.1049	0.5713	0.8729	0.8103	0.2321	0.05403	0.07407	0.04708	0.01755	0.0469	0.02193	0.09976
0.00775	0.1377	0.6628	0.9199	0.897	0.2713	0.04451	0.05877	0.07823	0.02316	0.06248	0.02673	0.09531
Figure supplement 2C; ETA: PDZ-RhoGEF-RlucII/rGFP-CAAX + Gα
Log [Endothelin 1], M	Mock			Rec+Mock			Gq			G11			G14			G15			G12			G13
Vehicle	0.091	0.087	0.09	0.082	0.078	0.083	0.074	0.073	0.075	0.068	0.064	0.071	0.073	0.067	0.075	0.064	0.061	0.068	0.11	0.111	0.123	0.078	0.084	0.08
-7.22	0.092	0.085	0.096	0.1	0.084	0.097	0.101	0.078	0.096	0.089	0.074	0.08	0.083	0.079	0.096	0.083	0.071	0.084	0.167	0.153	0.184	0.241	0.267	0.278
-7.69	0.093	0.089	0.089	0.099	0.089	0.097	0.094	0.084	0.09	0.088	0.076	0.086	0.088	0.079	0.093	0.084	0.073	0.086	0.179	0.165	0.187	0.277	0.283	0.291
-8.15	0.099	0.089	0.099	0.104	0.092	0.102	0.097	0.086	0.095	0.088	0.078	0.092	0.093	0.08	0.095	0.078	0.073	0.085	0.18	0.149	0.175	0.318	0.286	0.334
-8.62	0.106	0.09	0.095	0.1	0.09	0.111	0.095	0.082	0.095	0.09	0.077	0.088	0.095	0.087	0.099	0.08	0.07	0.086	0.191	0.158	0.169	0.33	0.319	0.296
-9.1	0.098	0.084	0.091	0.097	0.085	0.102	0.09	0.086	0.094	0.084	0.075	0.087	0.087	0.08	0.094	0.077	0.069	0.081	0.191	0.173	0.195	0.245	0.258	0.278
-9.55	0.098	0.094	0.099	0.092	0.081	0.102	0.083	0.078	0.089	0.08	0.072	0.077	0.083	0.076	0.083	0.072	0.068	0.075	0.209	0.191	0.22	0.16	0.168	0.185
-10.02	0.1	0.083	0.091	0.091	0.086	0.097	0.082	0.075	0.078	0.076	0.066	0.071	0.08	0.073	0.077	0.074	0.063	0.074	0.219	0.199	0.216	0.115	0.122	0.122
-10.49	0.096	0.094	0.101	0.091	0.077	0.093	0.081	0.072	0.076	0.076	0.07	0.075	0.079	0.074	0.077	0.069	0.066	0.071	0.203	0.172	0.21	0.103	0.104	0.1
-10.92	0.098	0.087	0.086	0.087	0.074	0.09	0.078	0.076	0.077	0.076	0.068	0.072	0.079	0.072	0.077	0.067	0.065	0.07	0.158	0.157	0.153	0.092	0.097	0.091
-11.4	0.087	0.093	0.097	0.087	0.08	0.083	0.078	0.075	0.076	0.073	0.067	0.072	0.076	0.069	0.075	0.067	0.065	0.071	0.137	0.138	0.133	0.085	0.087	0.095
-11.89	0.093	0.094	0.089	0.079	0.079	0.087	0.079	0.074	0.078	0.071	0.066	0.072	0.074	0.072	0.075	0.069	0.064	0.068	0.11	0.122	0.124	0.077	0.092	0.087
Log [Endothelin 1], M	Mock			Rec+Mock			Gi1			Gi2			GoA			GoB			Gz
Vehicle	0.087	0.091	0.101	0.076	0.082	0.087	0.077	0.074	0.076	0.072	0.07	0.077	0.081	0.081	0.093	0.075	0.076	0.086	0.071	0.069	0.079
-7.22	0.084	0.097	0.1	0.103	0.091	0.108	0.092	0.089	0.104	0.108	0.093	0.104	0.093	0.094	0.11	0.105	0.101	0.119	0.082	0.078	0.09
-7.69	0.092	0.1	0.099	0.097	0.095	0.106	0.098	0.086	0.097	0.102	0.094	0.108	0.104	0.099	0.121	0.115	0.102	0.121	0.081	0.08	0.085
-8.15	0.091	0.103	0.108	0.099	0.099	0.111	0.101	0.095	0.107	0.099	0.093	0.114	0.106	0.102	0.116	0.11	0.098	0.12	0.087	0.078	0.091
-8.62	0.095	0.101	0.103	0.105	0.099	0.106	0.096	0.097	0.105	0.115	0.093	0.109	0.113	0.097	0.122	0.117	0.107	0.129	0.086	0.078	0.089
-9.1	0.098	0.107	0.098	0.094	0.093	0.105	0.1	0.088	0.096	0.1	0.09	0.103	0.114	0.096	0.124	0.114	0.103	0.12	0.078	0.077	0.082
-9.55	0.099	0.106	0.094	0.091	0.087	0.098	0.088	0.081	0.094	0.096	0.082	0.097	0.108	0.099	0.115	0.106	0.101	0.109	0.077	0.077	0.084
-10.02	0.093	0.102	0.1	0.087	0.083	0.099	0.08	0.078	0.089	0.087	0.073	0.085	0.099	0.089	0.111	0.096	0.089	0.098	0.074	0.072	0.081
-10.49	0.093	0.099	0.094	0.089	0.081	0.092	0.076	0.081	0.086	0.082	0.074	0.078	0.093	0.089	0.096	0.089	0.082	0.089	0.073	0.074	0.076
-10.92	0.093	0.106	0.101	0.091	0.088	0.093	0.079	0.078	0.083	0.079	0.068	0.074	0.087	0.084	0.09	0.086	0.078	0.085	0.074	0.073	0.072
-11.4	0.092	0.099	0.103	0.086	0.088	0.094	0.079	0.078	0.083	0.079	0.074	0.079	0.088	0.084	0.094	0.081	0.076	0.084	0.07	0.07	0.071
-11.89	0.09	0.101	0.095	0.086	0.086	0.095	0.079	0.079	0.08	0.082	0.08	0.079	0.085	0.085	0.095	0.087	0.081	0.086	0.073	0.073	0.073
No Rec	+ETA
Mock	Mock	Gαq	Gα11	Gα14	Gα15	Gα12	Gα13	Gαi1	Gαi2	GαoA	GαoB	Gαz
0.001	0.02201	0.024	0.02262	0.01478	0.02227	0.08156	0.2021	0.01907	0.02792	0.02173	0.03104	0.01166
0.002592	0.01079	0.009033	0.009167	0.01126	0.008938	0.05674	0.1947	0.01361	0.02022	0.01497	0.02444	0.009864
0.005187	0.01775	0.01765	0.01443	0.01984	0.01643	0.06783	0.2114	0.02634	0.03154	0.02515	0.03706	0.01477
