# Supplementary material for: Effector membrane translocation biosensors reveal G protein and βarrestin coupling profiles of 100 therapeutically relevant GPCRs
Source: eLife. 2022 Mar 18;11:e74101. doi: 10.7554/eLife.74101 (PMC9005190; doi:10.7554/eLife.74101)
Supplement: Figure 2—figure supplement 3—source data 1. [file elife-74101-fig2-figsupp3-data1.xlsx]

## Sheet: Figure 2- figure supplement 3
Source data for Figure 2- figure supplement 3
Figure supplement 3A; B2: Gα proteins titration
Rap1GAP-RlucII/rGFP-CAAX + Endogenous Gαi/o					Rap1GAP-RlucII/rGFP-CAAX + Gαi1						Rap1GAP-RlucII/rGFP-CAAX + Gαi2						Rap1GAP-RlucII/rGFP-CAAX + GαoA						Rap1GAP-RlucII/rGFP-CAAX + GαoB						Rap1GAP-RlucII/rGFP-CAAX + Gαz
Log [Kallidin], M	0x Gα			Log [Kallidin], M	1/2x Gαi1	1x Gαi1	2.5x Gαi1	5x Gαi1		Log [Kallidin], M	1/2x Gαi2	1x Gαi2	2.5x Gαi2	5x Gαi2		Log [Kallidin], M	1/2x GαoA	1x GαoA	2.5x GαoA	5x GαoA		Log [Kallidin], M	1/2x GαoB	1x GαoB	2.5x GαoB	5x GαoB		Log [Kallidin], M	1/2x Gαz	1x Gαz	2.5x Gαz	5x Gαz
Vehicle	0.182			Vehicle	0.1745	0.184	0.1715	0.1795		Vehicle	0.1805	0.184	0.194	0.219		Vehicle	0.2045	0.207	0.211	0.2145		Vehicle	0.228	0.2345	0.2385	0.2715		Vehicle	0.459	0.379	0.4135	0.458
-4.22	0.247			-4.22186	0.256	0.272	0.314	1,128*		-4.22	0.366	0.418	0.482	0.573		-4.22186	0.294	0.316	0.33	0.31		-4.22	0.482	0.596	0.667	0.702		-4.22	0.948	0.963	1.136	1.087
-4.6	0.245			-4.64154	0.262	0.277	0.311	0.354		-4.6	0.362	0.433	0.49	0.593		-4.64154	0.291	0.328	0.336	0.33		-4.64	0.506	0.611	0.667	0.697		-4.64	0.968	0.956	1.127	1.069
-4.98	0.248			-5.06186	0.251	0.273	0.313	0.364		-4.98	0.376	0.435	0.503	0.592		-5.06186	0.312	0.326	0.35	0.324		-5.06	0.485	0.617	0.674	0.711		-5.06	0.994	1.016	1,935*	1.048
-5.36	0.246			-5.479	0.254	0.279	0.317	0.352		-5.36	0.38	0.44	0.512	0.589		-5.479	0.311	0.332	0.347	0.331		-5.48	0.508	0.638	0.692	0.672		-5.48	0.952	0.975	1.142	1.048
-5.74	0.253			-5.90663	0.257	0.269	0.313	0.361		-5.74	0.382	0.445	0.522	0.594		-5.90663	0.31	0.33	0.341	0.329		-5.91	0.485	0.631	0.674	0.692		-5.91	0.98	0.983	1.173	1.077
-6.12	0.253			-6.31878	0.265	0.277	0.32	0.401		-6.12	0.383	0.443	0.52	0.591		-6.31878	0.305	0.331	0.352	0.331		-6.32	0.489	0.623	0.683	0.684		-6.32	1.01	1.048	1.157	1.068
-6.49	0.254			-6.73994	0.255	0.274	0.303	0.353		-6.49	0.386	0.449	0.511	0.584		-6.73994	0.301	0.325	0.331	0.325		-6.74	0.48	0.653	0.675	0.688		-6.74	0.934	1.016	1.165	1.1
-6.87	0.248			-7.15491	0.259	0.268	0.335	0.331		-6.87	0.388	0.45	0.514	0.582		-7.15491	0.29	0.315	0.313	0.308		-7.15	0.463	0.611	0.646	0.66		-7.15	0.955	1.028	1.172	1.051
-7.25	0.248			-7.58503	0.261	0.26	0.289	0.308		-7.25	0.381	0.427	0.497	0.551		-7.58503	0.276	0.299	0.299	0.291		-7.59	0.447	0.612	0.592	0.582		-7.59	0.91	0.956	1.129	1.068
-7.62	0.25			-8	0.238	0.245	0.263	0.297		-7.62	0.352	0.411	0.473	0.513		-8	0.26	0.276	0.281	0.269		-8	0.428	0.506	0.538	0.514		-8	0.889	0.928	1.039	1.033
-8	0.241			-8.30125	0.238	0.234	0.247	0.26		-8	0.354	0.392	0.432	0.453		-8.30125	0.258	0.269	0.271	0.279		-8.3	0.408	0.464	0.484	0.481		-8.3	0.888	0.89	1.019	1.002
-8.3	0.231			-8.69906	0.218	0.217	0.221	0.237		-8.3	0.319	0.349	0.377	0.385		-8.69906	0.233	0.239	0.242	0.254		-8.7	0.344	0.379	0.368	0.397		-8.7	0.729	0.78	0.904	0.909
-8.66	0.217			-9.09694	0.202	0.201	0.196	0.198		-8.66	0.276	0.297	0.307	0.328		-9.09694	0.211	0.219	0.223	0.228		-9.1	0.266	0.291	0.304	0.315		-9.1	0.563	0.616	0.672	0.686
-9.02	0.204			-9.49487	0.189	0.187	0.184	0.19		-9.02	0.242	0.245	0.252	0.26		-9.49487	0.199	0.21	0.215	0.216		-9.49	0.227	0.25	0.272	0.282		-9.49	0.411	0.468	0.534	0.538
-9.36	0.189			-9.8928	0.176	0.179	0.177	0.182		-9.36	0.208	0.214	0.217	0.237		-9.8928	0.19	0.203	0.212	0.221		-9.89	0.211	0.233	0.259	0.275		-9.89	0.356	0.388	0.455	0.482
-9.74	0.186			-10.301	0.172	0.17	0.173	0.178		-9.74	0.194	0.202	0.208	0.222		-10.301	0.187	0.197	0.214	0.216		-10.3	0.199	0.228	0.249	0.267		-10.3	0.34	0.362	0.458	0.493
-10.1	0.179			-10.699	0.169	0.169	0.173	0.179		-10.1	0.186	0.187	0.201	0.218		-10.699	0.181	0.197	0.214	0.215		-10.7	0.198	0.229	0.246	0.284		-10.7	0.331	0.373	0.438	0.492
-10.44	0.175			-11.0969	0.168	0.165	0.172	0.181		-10.44	0.184	0.192	0.197	0.218		-11.0969	0.18	0.192	0.212	0.223		-11.1	0.194	0.226	0.243	0.277		-11.1	0.336	0.353	0.461	0.495
-10.8	0.175			-11.3979	0.169	0.166	0.171	0.176		-10.8	0.182	0.184	0.194	0.225		-11.3979	0.182	0.193	0.213	0.217		-11.4	0.192	0.221	0.238	0.27		-11.4	0.346	0.376	0.442	0.467
-11.22	0.174			-11.8861	0.164	0.167	0.167	0.176		-11.22	0.179	0.184	0.196	0.218		-11.8861	0.179	0.192	0.211	0.219		-11.89	0.194	0.22	0.241	0.274		-11.89	0.332	0.362	0.41	0.471
-11.7	0.174									-11.7	0.182	0.185	0.198	0.216
-11.89	0.177									-11.89	0.175	0.186	0.2	0.222
p63-RhoGEF-RlucII/rGFP-CAAX + Endogenous Gαq/11					p63-RhoGEF-RlucII/rGFP-CAAX + Gαq						p63-RhoGEF-RlucII/rGFP-CAAX + Gα11						p63-RhoGEF-RlucII/rGFP-CAAX + Gα14						p63-RhoGEF-RlucII/rGFP-CAAX + Gα15
Log [Kallidin], M	0x Gα			Log [Kallidin], M	1/2x Gαq	1x Gαq	2.5x Gαq	5x Gαq		Log [Kallidin], M	1/5x Gα11	1/2x Gα11	1x Gα11	2x Gα11		Log [Kallidin], M	1/2x Gα14	1x Gα14	2.5x Gα14	5x Gα14		Log [Kallidin], M	1/2x Gα15	1x Gα15	2.5x Gα15	5x Gα15
Vehicle	0.188			Vehicle	0.192	0.189	0.187	0.1855		Vehicle	0.184	0.267	0.217	0.1855		Vehicle	0.2955	0.2275	0.2115	0.2075		Vehicle	0.191	0.195	0.183	0.1795
-4.22	0.285			-4.22	0.519	0.552	0.584	0.571		-4.22	0.486	0.542	0.513	0.512		-4.22	0.504	0.579	0.65	0.682		-4.22	0.371	0.509	0.575	0.561
-4.6	0.285			-4.64	0.484	0.557	0.575	0.568		-4.64	0.492	0.52	0.51	0.483		-4.6	0.521	0.578	0.655	0.678		-4.64	0.378	0.528	0.576	0.553
-4.98	0.286			-5.06	0.489	0.566	0.589	0.552		-5.06	0.474	0.545	1,498*	0.49		-4.98	0.532	0.581	0.636	0.667		-5.06	0.374	0.502	0.576	0.537
-5.36	0.281			-5.48	0.487	0.54	0.597	0.552		-5.48	0.488	0.54	0.513	0.478		-5.36	0.524	0.581	0.631	0.687		-5.48	0.377	0.511	0.556	0.539
-5.74	0.284			-5.91	0.508	1,496*	0.571	0.563		-5.91	0.482	0.556	0.531	0.487		-5.74	0.528	0.579	0.636	0.685		-5.91	0.379	0.502	0.576	0.553
-6.12	0.289			-6.32	0.521	0.576	0.615	0.57		-6.32	0.477	0.553	0.542	0.486		-6.12	0.523	0.597	0.636	0.688		-6.32	0.384	0.498	0.578	0.546
-6.49	0.292			-6.74	0.517	0.622	0.617	0.562		-6.74	0.496	0.587	0.544	0.498		-6.49	0.527	0.588	0.641	0.689		-6.74	0.383	0.51	0.577	0.536
-6.87	0.295			-7.15	0.54	0.604	0.62	0.583		-7.15	0.482	0.584	0.581	0.506		-6.87	0.526	0.598	0.657	0.71		-7.15	0.392	0.509	0.571	0.549
-7.25	0.3			-7.59	0.513	0.595	0.624	0.598		-7.59	0.505	0.586	0.586	0.524		-7.25	0.547	0.599	0.668	0.686		-7.59	0.382	0.502	0.561	0.552
-7.62	0.295			-8	0.517	0.592	0.645	0.642		-8	0.496	0.603	0.598	0.558		-7.62	0.548	0.602	0.674	0.722		-8	0.376	0.496	0.576	0.557
-8	0.321			-8.3	0.522	0.594	0.656	0.617		-8.3	0.498	0.592	0.602	0.539		-8	0.554	0.612	0.691	0.724		-8.3	0.367	0.468	0.527	0.535
-8.3	0.284			-8.7	0.531	0.601	0.671	0.662		-8.7	0.509	0.597	0.581	0.569		-8.3	0.54	0.598	0.671	0.699		-8.7	0.342	0.432	0.42	0.482
-8.66	0.275			-9.1	0.478	0.579	0.653	0.667		-9.1	0.472	0.554	0.601	0.578		-8.66	0.545	0.594	0.681	0.707		-9.1	0.295	0.327	0.293	0.302
-9.02	0.261			-9.49	0.415	0.503	0.569	0.611		-9.49	0.393	0.478	0.537	0.54		-9.02	0.507	0.592	0.645	0.696		-9.49	0.234	0.245	0.215	0.211
-9.36	0.229			-9.89	0.297	0.341	0.406	0.454		-9.89	0.276	0.346	0.397	0.411		-9.36	0.43	0.487	0.538	0.541		-9.89	0.203	0.203	0.189	0.18
-9.74	0.207			-10.3	0.225	0.248	0.281	0.304		-10.3	0.217	0.247	0.267	0.281		-9.74	0.325	0.379	0.4	0.412		-10.3	0.196	0.192	0.189	0.181
-10.1	0.191			-10.7	0.202	0.202	0.219	0.223		-10.7	0.192	0.203	0.214	0.208		-10.1	0.276	0.346	0.298	0.295		-10.7	0.188	0.188	0.185	0.173
-10.44	0.182			-11.1	0.187	0.192	0.198	0.2		-11.1	0.19	0.191	0.194	0.192		-10.44	0.233	0.248	0.247	0.253		-11.1	0.187	0.186	0.18	0.177
-10.8	0.184			-11.4	0.184	0.188	0.19	0.189		-11.4	0.186	0.189	0.189	0.184		-10.8	0.24	0.248	0.232	0.224		-11.4	0.186	0.184	0.181	0.172
-11.22	0.183			-11.89	0.187	0.188	0.189	0.189		-11.89	0.189	0.187	0.184	0.182		-11.22	0.206	0.239	0.214	0.211		-11.89	0.188	0.188	0.18	0.174
-11.7	0.183															-11.699	0.208	0.205	0.208	0.207
-11.89	0.188															-11.89	0.21	0.209	0.213	0.211
PDZ-RhoGEF-RlucII/rGFP-CAAX + Endogenous Gα12/13					PDZ-RhoGEF-RlucII/rGFP-CAAX + Gα12						PDZ-RhoGEF-RlucII/rGFP-CAAX + Gα13
Log [Kallidin], M	0x Gα			Log [Kallidin], M	1/2x Gα12	1x Gα12	2.5x Gα12	5x Gα12		Log [Kallidin], M	1/2x Gα12	1x Gα12	2.5x Gα12	5x Gα12
Vehicle	0.1625			Vehicle	0.192	0.1905	0.2045	0.21		Vehicle	0.181	0.1845	0.184	0.1845
-4.22	0.169			-4.22	0.218	0.235	0.278	0.315		-4.22	0.249	0.319	0.366	0.433
-4.6	0.168			-4.64	0.219	0.239	0.281	0.301		-4.64	0.251	0.317	0.364	0.426
-4.98	0.173			-5.06	0.219	0.237	0.283	0.305		-5.06	0.248	0.333	0.367	0.423
-5.36	0.171			-5.48	0.219	0.232	0.281	0.305		-5.48	0.251	0.326	0.371	0.416
-5.74	0.174			-5.91	0.22	0.239	0.297	0.308		-5.91	0.255	0.316	0.361	0.43
-6.12	0.166			-6.32	0.216	0.237	0.29	0.307		-6.32	0.254	0.321	0.353	0.409
-6.49	0.171			-6.74	0.216	0.237	0.29	0.316		-6.74	0.248	0.309	0.342	0.392
-6.87	0.172			-7.15	0.214	0.235	0.299	0.308		-7.15	0.242	0.288	0.319	0.363
-7.25	0.175			-7.59	0.214	0.234	0.291	0.315		-7.59	0.228	0.26	0.291	0.314
-7.62	0.168			-8	0.215	0.234	0.282	0.306		-8	0.214	0.237	0.255	0.278
-8	0.174			-8.3	0.212	0.234	0.28	0.287		-8.3	0.206	0.228	0.235	0.292
-8.3	0.165			-8.7	0.209	0.231	0.272	0.293		-8.7	0.196	0.217	0.213	0.26
-8.66	0.168			-9.1	0.199	0.217	0.246	0.251		-9.1	0.189	0.2	0.206	0.188
-9.02	0.163			-9.49	0.192	0.208	0.223	0.23		-9.49	0.187	0.191	0.192	0.187
-9.36	0.161			-9.89	0.19	0.197	0.214	0.215		-9.89	0.185	0.186	0.188	0.182
-9.74	0.168			-10.3	0.187	0.19	0.212	0.214		-10.3	0.185	0.184	0.185	0.187
-10.1	0.164			-10.7	0.189	0.189	0.214	0.213		-10.7	0.185	0.182	0.186	0.185
-10.44	0.163			-11.1	0.19	0.191	0.21	0.212		-11.1	0.188	0.186	0.185	0.186
-10.8	0.164			-11.4	0.189	0.189	0.213	0.213		-11.4	0.182	0.181	0.184	0.183
-11.22	0.163			-11.89	0.187	0.189	0.206	0.213		-11.89	0.184	0.184	0.186	0.186
-11.7	0.166
-11.89	0.171
Figure supplement 3B; Receptors titration
M3: p63-RhoGEF-RlucII/rGFP-CAAX + Gαq
Log [Acetylcholine], M	0x Receptor			1/4x Receptor			1/2x Receptor			1x Receptor			2.5x Receptor
Vehicle	0.21	0.2	0.21	0.18	0.19	0.2	0.17	0.17	0.18	0.16	0.15	0.15	0.12	0.13	0.13
-4.22	0.24	0.24	0.24	0.97	0.98	0.98	0.99	0.9	1.01	0.91	0.9	0.88	0.69	0.76	0.79
-4.88	0.25	0.25	0.25	0.97	1.05	1.04	0.92	0.96	0.96	0.84	0.93	0.9	0.72	0.75	0.81
-5.54	0.24	0.26	0.22	0.92	1	0.93	0.91	0.92	0.9	0.89	0.92	0.92	0.74	0.8	0.76
-6.19	0.21	0.23	0.21	0.86	0.89	0.86	0.81	0.9	0.85	0.86	0.94	0.85	0.7	0.77	0.77
-6.86	0.21	0.21	0.23	0.71	0.69	0.66	0.77	0.8	0.68	0.83	0.85	0.77	0.69	0.76	0.73
-7.52	0.21	0.21	0.21	0.46	0.43	0.42	0.51	0.52	0.5	0.58	0.62	0.58	0.54	0.6	0.57
-8.1	0.21	0.2	0.22	0.29	0.26	0.28	0.33	0.31	0.32	0.39	0.38	0.37	0.37	0.39	0.39
-8.8	0.2	0.22	0.22	0.21	0.22	0.22	0.21	0.22	0.21	0.2	0.21	0.21	0.2	0.18	0.2
-9.49	0.21	0.2	0.21	0.2	0.19	0.2	0.19	0.2	0.2	0.17	0.17	0.17	0.15	0.15	0.15
-10.19	0.21	0.21	0.23	0.2	0.19	0.19	0.17	0.19	0.18	0.15	0.15	0.16	0.14	0.13	0.14
-10.92	0.22	0.23	0.21	0.21	0.2	0.2	0.18	0.18	0.19	0.16	0.16	0.16	0.14	0.14	0.14
D2: Rap1GAP-RlucII/rGFP-CAAX + Gαi1
Log [Dopamine], M	0x Receptor			1/4x Receptor			1/2x Receptor			1x Receptor			2.5x Receptor
Vehicle	0.21	0.18	0.19	0.16	0.16	0.17	0.13	0.15	0.14	0.11	0.11	0.11	0.09	0.08	0.08
-4.22	0.21	0.21	0.23	1	0.99	0.98	0.74	0.83	0.77	0.6	0.62	0.68	0.37	0.34	0.37
-4.97	0.22	0.2	0.23	1.03	0.99	1.04	0.84	0.86	0.78	0.65	0.68	0.66	0.38	0.37	0.37
-5.73	0.2	0.21	0.23	0.98	0.98	0.93	0.77	0.81	0.81	0.68	0.68	0.67	0.36	0.38	0.36
-6.47	0.21	0.2	0.23	0.97	0.99	0.94	0.74	0.85	0.77	0.66	0.69	0.65	0.38	0.38	0.37
-7.22	0.18	0.21	0.24	0.88	0.95	0.98	0.74	0.8	0.76	0.59	0.67	0.65	0.35	0.34	0.36
-8.22	0.2	0.19	0.21	0.28	0.29	0.27	0.27	0.27	0.22	0.22	0.22	0.21	0.12	0.13	0.11
-9.15	0.19	0.2	0.22	0.18	0.18	0.17	0.15	0.15	0.15	0.12	0.13	0.13	0.09	0.09	0.08
-10.1	0.2	0.2	0.24	0.16	0.16	0.17	0.13	0.14	0.14	0.12	0.12	0.11	0.08	0.08	0.08
-11.02	0.21	0.19	0.22	0.16	0.15	0.16	0.14	0.14	0.14	0.11	0.11	0.12	0.08	0.08	0.08
-11.92	0.21	0.19	0.21	0.17	0.16	0.16	0.13	0.13	0.14	0.12	0.11	0.12	0.08	0.08	0.08
-12.89	0.22	0.21	0.23	0.15	0.16	0.16	0.14	0.13	0.14	0.12	0.11	0.12	0.08	0.08	0.08
AT1: PDZ-RhoGEF-RlucII/rGFP-CAAX + Gα13
Log [Angiotensin II], M	0x Receptor			1/4x Receptor			1/2x Receptor			1x Receptor			2.5x Receptor
Vehicle	0.21	0.23	0.2	0.21	0.18	0.2	0.17	0.23	0.17	0.14	0.15	0.2	0.13	0.14	0.13
-5.22	0.23	0.21	0.21	0.2	0.21	0.29	0.22	0.22	0.25	0.22	0.28	0.31	0.48	0.5	0.57
-5.88	0.19	0.18	0.24	0.21	0.19	0.29	0.22	0.21	0.25	0.24	0.27	0.28	0.55	0.51	0.54
-6.54	0.21	0.22	0.2	0.21	0.2	0.26	0.23	0.22	0.22	0.21	0.23	0.33	0.49	0.58	0.56
-7.19	0.22	0.22	0.19	0.2	0.19	0.24	0.22	0.26	0.22	0.26	0.26	0.32	0.49	0.49	0.57
-7.86	0.19	0.19	0.19	0.17	0.21	0.27	0.21	0.23	0.21	0.22	0.23	0.29	0.51	0.44	0.55
-8.52	0.17	0.17	0.23	0.18	0.23	0.26	0.22	0.23	0.18	0.18	0.18	0.27	0.34	0.33	0.35
-9.14	0.18	0.22	0.23	0.17	0.19	0.24	0.2	0.21	0.2	0.15	0.17	0.24	0.19	0.21	0.23
-9.83	0.18	0.23	0.22	0.16	0.2	0.23	0.19	0.2	0.19	0.14	0.15	0.25	0.16	0.17	0.18
-10.51	0.19	0.22	0.21	0.23	0.19	0.23	0.18	0.18	0.22	0.15	0.16	0.2	0.12	0.14	0.16
-11.19	0.19	0.22	0.21	0.19	0.17	0.25	0.18	0.19	0.19	0.15	0.15	0.22	0.15	0.16	0.15
-11.85	0.18	0.18	0.18	0.19	0.17	0.2	0.2	0.19	0.19	0.13	0.16	0.22	0.13	0.14	0.18
Figure supplement 3C; Effector-RlucII titration
ETA: p63-RhoGEF-RlucII/rGFP-CAAX + Gαq
Log [Endothelin-1], M	0x p63-RlucII			1/4x p63-RlucII			1/2x p63-RlucII			1x p63-RlucII			2x p63-RlucII
Vehicle	0.473	0.616	0.516	0.19	0.208	0.229	0.118	0.138	0.16	0.096	0.132	0.125	0.101	0.134	0.136
-7.22	0.451	0.534	0.631	0.48	0.575	0.586	0.432	0.532	0.486	0.392	0.518	0.443	0.362	0.501	0.451
-7.69	0.614	0.5	0.553	0.491	0.616	0.521	0.41	0.531	0.473	0.41	0.488	0.443	0.379	0.516	0.472
-8.15	0.455	0.549	0.406	0.495	0.539	0.543	0.442	0.571	0.483	0.401	0.521	0.45	0.402	0.528	0.504
-8.62	0.547	0.732	0.516	0.517	0.594	0.542	0.461	0.575	0.548	0.449	0.563	0.497	0.408	0.564	0.521
-9.1	0.446	0.405	0.829	0.512	0.638	0.579	0.467	0.639	0.576	0.439	0.587	0.505	0.411	0.547	0.511
-9.55	0.498	0.497	0.627	0.482	0.643	0.499	0.439	0.498	0.521	0.421	0.526	0.479	0.379	0.495	0.454
-10.02	0.484	0.561	0.524	0.22	0.254	0.228	0.175	0.237	0.208	0.165	0.205	0.195	0.165	0.212	0.179
-10.48	0.55	0.503	0.594	0.183	0.208	0.211	0.133	0.165	0.18	0.121	0.158	0.14	0.128	0.192	0.149
-10.95	0.497	0.649	0.57	0.162	0.176	0.217	0.121	0.154	0.164	0.116	0.138	0.134	0.11	0.139	0.132
-11.42	0.677	0.427	0.672	0.151	0.201	0.188	0.123	0.16	0.152	0.106	0.127	0.131	0.108	0.139	0.137
-11.92	0.606	0.511	0.532	0.186	0.221	0.221	0.124	0.161	0.15	0.117	0.134	0.129	0.108	0.133	0.127
ETA: Rap1GAP-RlucII/rGFP-CAAX + Gαi1
Log [Endothelin-1], M	0x Rap1GAP-RlucII			1/4x Rap1GAP-RlucII			1/2x Rap1GAP-RlucII			1x Rap1GAP-RlucII			2x Rap1GAP-RlucII
Vehicle	0.625	0.352	0.573	0.071	0.098	0.101	0.073	0.099	0.101	0.071	0.09	0.093	0.072	0.092	0.087
-7.22	0.478	0.482	0.554	0.519	0.666	0.754	0.44	0.579	0.649	0.356	0.462	0.501	0.258	0.372	0.415
-7.69	0.369	0.536	0.502	0.551	0.707	0.77	0.467	0.596	0.656	0.382	0.493	0.475	0.286	0.384	0.415
-8.15	0.605	0.556	0.436	0.552	0.668	0.785	0.463	0.596	0.674	0.388	0.462	0.504	0.291	0.364	0.416
-8.62	0.55	0.7	0.544	0.578	0.719	0.844	0.495	0.623	0.693	0.388	0.489	0.517	0.308	0.393	0.435
-9.1	0.524	0.544	0.632	0.558	0.722	0.789	0.493	0.657	0.682	0.397	0.495	0.502	0.307	0.409	0.414
-9.55	0.399	0.638	0.531	0.468	0.595	0.671	0.396	0.523	0.603	0.342	0.427	0.466	0.278	0.365	0.38
-10.02	0.503	0.592	0.598	0.15	0.194	0.202	0.14	0.192	0.195	0.134	0.177	0.184	0.127	0.165	0.184
-10.48	0.38	0.705	0.479	0.097	0.121	0.14	0.099	0.119	0.136	0.096	0.116	0.13	0.093	0.126	0.13
-10.95	0.519	0.497	0.515	0.08	0.096	0.113	0.079	0.099	0.113	0.08	0.095	0.106	0.081	0.093	0.099
-11.42	0.41	0.496	0.523	0.072	0.089	0.092	0.076	0.091	0.102	0.072	0.087	0.09	0.07	0.085	0.092
-11.92	0.533	0.515	0.448	0.072	0.081	0.093	0.073	0.089	0.1	0.071	0.087	0.092	0.071	0.093	0.084
ETA: PDZ-RhoGEF-RlucII/rGFP-CAAX + Gα13
Log [Endothelin-1], M	0x PDZ-RhoGEF-RlucII			1/2x PDZ-RhoGEF-RlucII			7/9x PDZ-RhoGEF-RlucII			1x PDZ-RhoGEF-RlucII			2x PDZ-RhoGEF-RlucII
Vehicle	0.54	0.532	0.522	0.162	0.183	0.163	0.114	0.154	0.14	0.106	0.139	0.099	0.085	0.107	0.084
-7.22	0.643	0.531	0.546	0.348	0.345	0.376	0.32	0.341	0.365	0.277	0.371	0.315	0.278	0.324	0.298
-7.69	0.684	0.589	0.415	0.384	0.405	0.343	0.308	0.385	0.372	0.345	0.352	0.309	0.297	0.289	0.309
-8.15	0.609	0.58	0.472	0.353	0.425	0.386	0.316	0.391	0.384	0.324	0.372	0.347	0.3	0.329	0.323
-8.62	0.522	0.774	0.561	0.414	0.41	0.457	0.336	0.37	0.395	0.329	0.382	0.396	0.271	0.305	0.347
-9.1	0.464	0.596	0.631	0.372	0.443	0.406	0.343	0.387	0.398	0.355	0.425	0.324	0.309	0.351	0.393
-9.55	0.607	0.469	0.623	0.355	0.425	0.359	0.317	0.34	0.384	0.314	0.354	0.334	0.283	0.292	0.286
-10.02	0.43	0.667	0.561	0.21	0.221	0.238	0.161	0.206	0.204	0.16	0.203	0.192	0.156	0.168	0.141
-10.48	0.578	0.656	0.566	0.187	0.196	0.176	0.139	0.176	0.171	0.141	0.15	0.169	0.144	0.132	0.136
-10.95	0.589	0.672	0.656	0.177	0.158	0.179	0.109	0.143	0.163	0.11	0.129	0.153	0.11	0.105	0.103
-11.42	0.623	0.558	0.458	0.132	0.164	0.186	0.119	0.117	0.147	0.095	0.115	0.11	0.106	0.096	0.093
-11.92	0.511	0.659	0.836	0.156	0.178	0.188	0.127	0.142	0.141	0.111	0.115	0.126	0.094	0.09	0.084
