# Supplementary material for: Effector membrane translocation biosensors reveal G protein and βarrestin coupling profiles of 100 therapeutically relevant GPCRs
Source: eLife. 2022 Mar 18;11:e74101. doi: 10.7554/eLife.74101 (PMC9005190; doi:10.7554/eLife.74101)
Supplement: Figure 2—figure supplement 4—source data 1. [file elife-74101-fig2-figsupp4-data1.xlsx]

## Sheet: Figure 2- figure supplement 4
Source data for Figure 2- figure supplement 4
Time (s)	Gs no stimulated		Gs		Gi1 no stimulated		Gi1		Gi2 no stimulated		Gi2		GoA no stimulated		GoA		GoB no stimulated		GoB		Gz no stimulated		Gz		G12 no stimulated		G12		G13 no stimulated		G13		Gq no stimulated		Gq		G11 no stimulated		G11		G14 no stimulated		G14		G15/16 no stimulated		G15/16		Gz/G15 no stimulated
-149.481	99.0857	99.5481	101.486	98.195	92.3494	81.4406	98.0767	92.0209	98.8638	81.0558	99.2954	90.1979	98.7034	85.5291	103.35	90.295	105.193	86.3567	104.11	91.5102	97.9262	86.1286	102.334	84.2261	116.115	111.432	122.273	115.132	132.345	123.002	129.505	123.111	93.4281	90.1954	93.2124	90.8357	101.699	93.0416	94.4655	92.307	99.264	87.5582	96.0269	89.7848	89.4165	81.3796	92.9965	80.8069	95.9643
-89.475	98.6661	100.41	102.804	99.1941	93.3841	81.4596	101.14	97.1154	98.7273	86.1729	108.574	94.2263	103.543	89.372	104.95	94.6944	103.169	88.9612	101.58	93.2184	95.9609	87.2528	100.555	85.9811	105.831	104.907	112.318	108.749	112.14	109.632	112.15	109.937	96.1479	93.6949	97.5778	97.3957	106.227	98.6863	99.7196	97.8543	102.396	95.7065	103.342	95.2193	98.6294	91.3173	101.137	90.1547	100.415
-59.474	102.525	103.245	108.854	103.57	108.567	95.2386	105.909	108.086	103.05	97.0071	108.215	104.847	107.803	100.539	112.097	103.835	104.096	97.0496	110.281	99.0601	95.4889	94.8893	106.663	94.0913	98.7363	99.319	94.5979	98.6844	102.856	94.723	95.5781	95.8077	109.309	108.342	109.067	107.437	112.875	108.934	109.383	107.7	112.005	107.417	111.45	109.462	108.586	110.294	109.975	109.566	110.28
-30	99.723	96.7969	86.8553	99.0404	105.7	141.861	94.8745	102.778	99.3593	135.764	83.9159	110.729	89.9515	124.56	79.603	111.176	87.542	127.633	84.0285	116.211	110.624	131.729	90.4483	135.702	79.3178	84.3418	70.8105	77.434	52.6591	72.643	62.7668	71.1447	101.115	107.768	100.143	104.332	79.199	99.3377	96.4321	102.138	86.3352	109.318	89.1816	105.534	103.368	117.009	95.8906	119.473	93.3405
0	105.511	104.204	109.414	106.055	95.338	83.4648	157.12	165.304	108.787	81.7081	120.99	110.628	106.683	91.1571	122.056	108.99	111.022	88.8997	121.419	105.272	110.999	94.7499	107.508	93.4331	148.986	136.724	166.928	146.37	209.111	166.019	389.341	352.343	95.4487	89.5388	120.597	109.585	105.699	90.2253	117.283	110.971	101.556	84.5835	127.56	123.276	86.9036	71.7086	151.03	137.393	112.98
29.478	98.9209	102.071	106.409	103.91	94.5041	76.3065	209.585	228.99	105.299	78.3705	139.527	132.159	105.228	88.1969	139.679	132.734	112.832	85.8066	142.906	127.794	114.017	94.879	107.122	96.2995	155.793	138.692	167.657	148.486	221.565	170.345	524.351	470.356	87.5917	85.9229	141.855	136.288	101.613	87.9705	134.046	131.44	101.409	80.2337	152.789	176.221	86.8082	72.2531	161.54	152.847	104.334
59.474	99.3967	101.219	104.459	101.674	91.879	74.3484	280.83	300.844	108.016	77.1628	172.041	161.067	104.545	87.5802	166.192	158.916	114.124	83.6219	171.194	160.695	116.568	96.8173	115.517	104.651	169.953	137.699	175.395	156.519	232.862	174.6	637.488	556.724	86.4103	83.5387	166.261	159.896	101.769	85.9401	154.958	157.478	96.7721	77.8638	203.033	234.82	81.1552	70.1917	179.187	167.547	104.797
89.479	99.2382	102.571	103.496	100.644	92.9513	74.9834	335.958	359.446	107.284	76.9822	192.472	184.293	106.404	84.9405	194.998	184.647	116.002	84.0395	204.314	190.186	120.043	98.5248	124.158	114.815	179.066	144.287	187.568	163.177	247.854	179.991	720.228	629.383	83.067	81.784	184.88	181.494	97.1115	84.2086	178.174	179.466	94.1931	76.5245	244.13	279.837	85.6098	67.8349	193.213	175.15	106.495
119.481	100.566	100.026	103.305	99.5532	93.4382	74.6178	375.614	403.472	108.723	76.4603	220.932	204.5	105.096	86.4018	216.372	207.008	119.051	83.9332	227.456	218.34	123.74	100.071	135.621	128.704	172.699	144.726	191.678	169.948	243.324	187.018	749.661	673.395	84.1811	82.7917	199.791	199.138	98.6573	83.1794	195.868	200.249	96.2323	77.5367	266.47	315.03	85.1639	63.6857	201.947	182.842	108.489
149.481	98.5235	101.969	100.952	97.8538	88.173	74.6001	417.389	440.074	110.632	77.5105	237.153	222.671	106.419	85.2628	237.716	225.306	117.286	83.5117	252.118	239.054	126.748	101.336	147.326	143.616	176.385	148.593	205.471	176.447	271.476	185.843	787.854	701.665	83.7345	80.8656	211.452	214.41	98.7998	82.8208	216.96	220.667	91.0281	74.4448	292.265	338.614	82.575	64.1667	215.596	194.791	108.955
179.48	100.275	100.967	100.17	97.1274	92.8822	74.2467	448.725	475.149	108.444	75.0921	252.106	238.437	105.159	86.9014	254.483	240.822	119.111	83.4693	274.485	258.931	133.167	102.644	161.212	159.24	178.241	146.894	210.872	183.379	265.156	195.87	804.146	714.216	82.8661	80.025	221.828	227.453	95.7023	80.7648	231.653	238.906	93.1556	74.4955	309.854	357.628	83.3952	66.0359	214.755	198.302	105.222
209.485	98.2963	99.9927	99.2928	96.17	95.1596	73.3092	474.974	501.881	113.742	75.4393	269.591	248.639	108.853	85.1299	265.359	253.048	118.398	82.778	288.227	277.003	133.874	107.045	173.27	175.98	182.454	146.799	223.719	187.972	252.341	193.283	839.747	725.988	79.5852	79.5857	229.122	236.607	94.9997	81.8408	238.376	252.101	94.0297	73.1051	322.135	374.503	83.0036	66.029	227.376	205.372	107.141
239.484	100.482	100.49	98.386	93.9059	93.8821	72.3985	505.601	525.782	111.653	75.4732	281.806	258.43	109.386	84.6911	272.7	266.128	119.897	82.8738	307.493	289.449	135.009	105.437	188.108	190.574	178.427	151.458	232.918	197.819	278.901	200.068	881.815	728.817	83.5209	80.0717	240.844	248.925	97.5407	78.2025	256.037	266.208	97.6482	73.3189	330.705	387.522	78.8868	63.2009	224.947	205.863	109.324
269.483	99.858	100.907	96.413	91.2116	92.4651	70.3424	523.32	547.821	114.236	72.7696	292.864	267.264	107.211	86.105	292.376	273.174	119.244	80.7895	312.494	300.436	138.499	107.322	202.737	205.665	184.836	148.371	248.081	206.672	291.913	198.459	859.078	745.617	80.3371	78.3937	246.447	254.799	96.5339	80.2895	259.126	277.379	91.8846	70.2274	343.86	403.948	77.8502	64.8682	234.025	215.645	109.455
299.486	96.8093	98.9163	92.0379	89.7136	94.3893	72.7936	526.264	563.988	113.541	73.4617	302.167	274.859	108.307	83.5982	297.784	281.795	117.037	82.3414	323.41	309.718	141.674	107.385	213.612	219.127	189.966	151.077	249.886	207.491	301.972	197.328	863.64	735.587	82.3391	77.1487	249.624	265.654	94.5856	79.8877	271.916	289.392	87.1348	71.2195	355.315	414.154	79.2832	60.6429	236.065	223.705	107.391
329.493	96.8081	99.3985	92.1741	89.0792	91.1215	71.3542	556.583	577.965	114.016	73.0921	311.829	279.898	110.709	87.0269	305.331	289.669	118.65	82.2109	331.155	316.403	138.887	107.626	225.134	228.681	190.112	145.142	255.103	216.999	274.99	198.138	866.434	738.585	83.2041	77.6679	255.626	272.813	94.1872	80.0021	283.248	300.316	94.1287	69.7402	362.954	421.884	81.435	61.2257	237.752	223.586	105.248
359.494	97.0848	100.125	90.3588	86.3204	94.5308	72.6304	567.113	591.366	114.361	74.1128	319.586	286.572	109.603	85.0059	311.608	290.584	116.836	81.7513	339.335	325.901	141.892	108.402	233.295	240.944	182.839	146.042	266.094	219.212	304.041	203.814	883.248	746.863	79.012	77.2169	259.088	282.718	93.2486	77.7038	285.501	308.821	92.075	71.6649	368.604	428.589	81.4086	62.1035	252.681	229.401	109.831
389.505	97.5041	96.8095	88.7801	85.3902	94.6455	71.7219	567.77	606.608	118.494	73.9153	322.491	288.87	110.467	83.2939	314.385	296.886	121.966	79.5495	349.061	328.065	145.265	111.009	241.38	250.322	193.522	149.149	263.263	220.754	283.83	207.688	888.236	747.007	78.3866	77.7947	261.949	283.474	92.5902	78.2622	294.009	317.498	89.2023	71.45	372.874	437.52	79.3753	62.2275	249.625	233.133	104.954
419.496	97.6028	97.1373	89.2269	83.518	94.5444	71.2991	588.567	617.013	111.445	72.9983	335.225	296.646	110.041	84.2051	325.269	300.128	118.867	80.803	347.278	333.101	146.749	112.027	250.785	259.763	188.164	151.887	278.277	224.48	318.334	204.435	859.356	764.365	77.8873	79.8237	270.593	291.04	92.6655	76.203	297.082	325.242	96.5387	70.8927	383.242	440.338	71.7347	63.2906	248.724	237.373	109.04
449.498	94.2138	98.2867	88.7843	82.9824	91.1087	71.8507	595.041	625.661	113.644	72.5026	332.422	299.477	111.631	84.8374	327.56	307.924	119.665	80.1178	355.016	337.188	145.878	109.609	257.579	266.509	195.534	143.604	270.882	226.787	298.541	200.613	878.708	757.656	81.6721	77.8709	270.914	295.063	94.0692	77.298	307.011	328.976	90.7194	69.746	388.177	448.086	74.8193	62.1793	256.871	233.566	109.754
479.508	93.3405	96.07	85.3588	80.2967	93.5061	68.9354	605.172	634.653	115.334	72.5126	334.377	301.154	111.17	84.0403	335.836	312.846	118.506	80.2202	363.195	339.418	147	110.713	264.443	272.144	189.294	146.448	274.957	231.975	317.959	204.793	849.638	757.095	80.6603	77.452	270.429	303.611	95.5215	77.6631	314.341	335.398	91.1732	70.0506	396.632	453.682	86.2091	61.3187	257.553	243.59	107.847
[truncated: 15 more columns]
