# Supplementary material for: Effector membrane translocation biosensors reveal G protein and βarrestin coupling profiles of 100 therapeutically relevant GPCRs
Source: eLife. 2022 Mar 18;11:e74101. doi: 10.7554/eLife.74101 (PMC9005190; doi:10.7554/eLife.74101)
Supplement: Figure 2—figure supplement 5—source data 1. [file elife-74101-fig2-figsupp5-data1.xlsx]

## Sheet: Figure 2-figure supplement 5
Source data for Figure 2- figure supplement 5
D2: Rap1GAP-RlucII/rGFP-CAAX + Gαi1										GIP: Rap1GAP-RlucII/rGFP-CAAX + Gαi1									PTH1: Rap1GAP-RlucII/rGFP-CAAX + Gαi1										D2: Rap1GAP-RlucII/rGFP-CAAX + Gαi2										GIP: Rap1GAP-RlucII/rGFP-CAAX + Gαi2
Log [Dopamine], M	Gαβγ			GEMTA						Log [GIP], M	Gαβγ			Log [GIP], M	GEMTA				Log [PTH (1-34)], M	Gαβγ			Log [PTH (1-34)], M	GEMTA					Log [Dopamine], M	Gαβγ			GEMTA						Log [GIP], M	Gαβγ			Log [GIP], M	GEMTA					Log [PTH (1-34)], M
Vehicle	100	100	100	100	100	100	100	100		Vehicle	100	100	100	Vehicle	100	100	100		Vehicle	100	100	100	Vehicle	100	100	100			Vehicle	100	100	100	100	100	100	100	100		Vehicle	100	100	100	Vehicle	100	100	100	100		Vehicle
-4.22	134	131	132	502	750	834	885	1016		-6.22	117	119	116	-6.22	243	257	297		-6.22	118	115	116	-6.22	409	358	413			-4.22	150	134	138	408	384	523	548	623		-6.22	125	125	126	-6.22	325	279	294	313		-6.22
-4.97	134	130	133	720	678	786	875	963		-6.88	115	112	112	-6.88	265	292	281		-7.08	114	99	111	-6.88	455	357	507			-4.97	144	137	136	405	344	514	548	615		-6.88	125	128	121	-6.88	303	281	276	315		-7.08
-5.73	134	129	133	711	676	794	888	922		-7.54	116	109	113	-7.54	316	286	277		-7.94	102	101	101	-7.54	385	343	410			-5.73	143	140	137	361	327	491	558	574		-7.54	125	130	125	-7.54	322	296	282	319		-7.94
-6.47	130	127	130	782	668	730	879	923		-8.19	110	110	114	-8.19	241	257	236		-8.8	100	96	98	-8.19	177	294	213			-6.47	142	136	138	387	338	490	520	562		-8.19	124	126	121	-8.19	307	262	256	292		-8.8
-7.22	133	121	129	783	629	727	801	850		-8.86	110	106	114	-8.86	181	203	177		-9.66	100	94	98	-8.86	126	140	140			-7.22	133	130	135	360	305	436	460	492		-8.86	119	124	117	-8.86	249	197	214	232		-9.66
-8.22	116	105	118	496	359	444	443	318		-9.52	108	99	107	-9.52	133	146	126		-10.7	100	99	100	-9.52	107	91	121			-8.22	119	116	114	247	197	276	251	207		-9.52	107	119	111	-9.52	164	135	155	152		-10.7
-9.15	105	107	110	185	155	179	157	128		-10.17	94	93	100	-10.14	160	103	109		-10.14	98	96	97	-10.14	119	97	104			-9.15	102	102	94	132	123	130	128	123		-10.17	100	106	96	-10.14	117	152	103	112		-10.14
-10.1	97	98	103	108	101	107	106	96		-10.84	90	93	101	-10.84	104	92	105		-10.83	98	94	98	-10.84	118	95	105			-10.1	83	99	96	117	108	100	93	109		-10.84	95	94	92	-10.84	102	106	99	107		-10.83
-11.02	95	100	105	105	96	93	105	99		-11.53	93	93	99	-11.52	105	96	109		-11.52	100	99	98	-11.52	115	89	105			-11.02	96	104	97	112	104	99	92	98		-11.53	93	103	98	-11.52	111	96	92	106		-11.52
-11.92	92	95	101	109	96	101	110	102		-12.21	96	89	94	-12.22	90	92	98		-12.22	99	94	93	-12.22	118	87	107			-11.92	95	102	88	110	103	93	97	103		-12.21	97	102	97	-12.22	101	97	94	109		-12.22
-12.89	104	88	100	101	99	107	111	104		-12.92	104	90	96	-12.89	91	92	104		-12.89	103	90	92	-12.89	114	88	114			-12.89	98	92	90	107	100	95	102	111		-12.92	97	102	100	-12.89	104	96	103	116		-12.89
D2: Rap1GAP-RlucII/rGFP-CAAX + GαoB											GIP: Rap1GAP-RlucII/rGFP-CAAX + GαoB											PTH1: Rap1GAP-RlucII/rGFP-CAAX + GαoB											M3: p63-RhoGEF-RlucII/rGFP-CAAX + Gαq										ETA: p63-RhoGEF-RlucII/rGFP-CAAX + Gαq
Log [Dopamine], M	Gαβγ			GEMTA							Log [GIP], M	Gαβγ			Log [GIP], M	GEMTA						Log [PTH (1-34)], M	Gαβγ			Log [PTH (1-34)], M	GEMTA						Log [Acetylcholine], M	Gαβγ			Log [Acetylcholine], M	GEMTA					Log [Endothelin-1], M	Gαβγ				GEMTA
Vehicle	100	100	100	100	100	100	100	100	100		Vehicle	100	100	100	Vehicle	100	100	100	100	100		Vehicle	100	100	100	Vehicle	100	100	100				Vehicle	100	100	100	Vehicle	100	100	100	100		-13	100	100	100	100	100	100
-4.22	139	140	126	435	418	473	425	489	407		-6.22	132	122	116	-6.22	429	339	307	300	464		-6.22	119	132	125	-6.22	384	340	384				-4.22	153	155	157	-4.22	752	684	723	615		-7.22	128	144	143	145	595	622
-4.97	133	139	128	463	396	477	422	481	408		-6.88	131	124	115	-6.88	437	382	311	283	404		-7.08	118	130	124	-6.88	488	389	433				-4.88	158	148	161	-4.88	787	698	801	644		-7.69	139	136	137	147	583	637
-5.73	139	138	132	436	388	449	431	482	398		-7.54	133	120	116	-7.54	419	469	328	300	403		-7.94	95	123	107	-7.54	495	387	404				-5.54	154	154	162	-5.54	761	670	767	621		-8.15	137	144	144	132	580	623
-6.47	135	138	127	474	394	471	397	452	391		-8.19	125	125	114	-8.19	417	382	289	271	350		-8.8	90	103	102	-8.19	322	339	224				-6.19	143	132	147	-6.19	656	596	709	577		-8.62	143	149	143	153	591	671
-7.22	137	138	128	483	388	426	405	456	384		-8.86	125	119	110	-8.86	354	326	237	228	287		-9.66	93	110	102	-8.86	159	134	117				-6.86	137	130	147	-6.86	535	491	609	497		-9.1	145	149	151	131	577	630
-8.22	128	127	124	445	349	426	348	385	338		-9.52	114	114	103	-9.52	234	210	182	164	210		-10.7	93	114	98	-9.52	134	98	118				-7.52	121	118	124	-7.52	338	320	427	357		-9.55	138	141	136	129	463	566
-9.15	108	116	109	320	230	305	247	249	194		-10.17	104	102	93	-10.14	130	220	119	117	120		-10.14	96	116	98	-10.14	136	90	115				-8.1	110	100	118	-8.14	200	172	273	230		-10.02	103	107	111	108	293	320
-10.1	90	111	95	176	122	159	121	131	118		-10.84	105	104	91	-10.84	111	155	107	114	109		-10.83	91	115	100	-10.84	138	95	112				-8.8	113	99	105	-8.84	127	114	155	140		-10.48	95	105	110	96	170	196
-11.02	88	109	95	129	106	108	101	105	100		-11.53	108	103	88	-11.52	102	132	103	115	114		-11.52	91	115	99	-11.52	133	92	107				-9.49	104	104	98	-9.52	121	106	120	109		-10.95	96	107	91	99	124	129
-11.92	95	108	89	134	111	101	103	102	104		-12.21	110	96	92	-12.22	96	125	105	117	116		-12.22	87	108	101	-12.22	138	99	115				-10.19	104	107	109	-10.22	109	106	115	105		-11.42	87	99	115	82	107	111
-12.89	93	100	88	118	103	100	99	91	102		-12.92	103	100	90	-12.89	98	106	101	104	108		-12.89	94	101	92	-12.89	120	95	102				-10.92	103	110	100	-10.89	111	99	108	101		-11.92	92	101	93	93	101	102
FP: PDZ-RhoGEF-RlucII/rGFP-CAAX + Gα12									Cys-LT2: PDZ-RhoGEF-RlucII/rGFP-CAAX + Gα12											PTH1: PDZ-RhoGEF-RlucII/rGFP-CAAX + Gα12													FP: PDZ-RhoGEF-RlucII/rGFP-CAAX + Gα13												Cys-LT2: PDZ-RhoGEF-RlucII/rGFP-CAAX + Gα13
Log [PGD2], M	Gαβγ			GEMTA					Log [LTD4], M	Gαβγ			GEMTA							Log [PTH (1-34)], M	Gαβγ			Log [PTH (1-34)], M	GEMTA								Log [PGD2], M	Gαβγ			GEMTA								Log [LTD4], M	Gαβγ			GEMTA
Vehicle	100	100	100	100	100	100	100		Vehicle	100	100	100	100	100	100	100	100	100		Vehicle	100	100	100	Vehicle	100	100	100	100	100	100			Vehicle	100	100	100	100	100	100	100	100	100	100		Vehicle	100	100	100	100
-5.22	129	126	114	173	201	229	247		-6.4	144	137	132	190	183	223	162	209	219		-6.22	125	125	118	-6.22	159	164	180	146	126	132			-5.22	134	134	131	257.961	246.434	278.342	260.823	249	290	322		-6.4	133	131	125	729
-5.88	124	124	113	173	200	226	259		-6.86	143	137	134	186	191	212	151	223	202		-7.08	119	117	116	-6.88	131	146	168	144	130	130			-5.88	130	129	127	280.382	269.971	265.149	281.331	243	284	317		-6.86	129	132	123	705
-6.54	119	122	111	145	185	215	236		-7.33	142	135	137	210	183	208	172	250	212		-7.94	108	107	110	-7.54	104	106	124	111	113	98			-6.54	121	121	124	275.137	279.897	285.962	265.949	236	318	366		-7.33	125	123	122	669
-7.19	109	112	104	178	174	221	238		-7.79	138	132	136	187	183	204	162	250	227		-8.8	101	107	105	-8.19	77	119	110	98	82	94			-7.19	113	111	116	263.07	274.613	276.321	286.106	251	333	319		-7.79	119	118	119	583
-7.86	107	106	104	147	159	216	222		-8.27	135	129	133	192	203	224	188	215	222		-9.66	100	102	107	-8.86	77	96	90	106	98	90			-7.86	99	102	106	286.238	229.72	257.467	275.13	254	296	328		-8.27	104	108	107	290
-8.52	99	105	102	137	123	159	178		-8.73	122	116	123	204	203	223	177	240	211		-10.7	104	102	113	-9.52	85	111	97	101	88	87			-8.52	90	102	99	207.964	227.362	213.266	229.635	235	254	286		-8.73	93	100	102	155
-9.14	100	103	103	80	115	121	125		-9.19	113	113	116	180	184	213	189	147	160		-10.14	97	104	104	-10.14	77	97	111	106	107	80			-9.14	88	93	99	115.111	140.613	128.766	118.559	115	139	140		-9.19	92	95	104	120
-9.83	96	97	100	99	119	121	114		-9.67	107	104	111	169	166	170	145	140	126		-10.83	95	97	103	-10.84	85	97	107	106	83	83			-9.83	89	96	99	96.9491	109.383	106.98	98.9613	95	111	116		-9.67	93	92	101	104
-10.52	90	99	100	116	96	108	108		-10.09	98	99	106	134	127	126	111	116	114		-11.52	91	99	101	-11.52	77	110	109	112	95	84			-10.52	91	88	100	103.388	87.7928	87.8389	111.46	83	93	92		-10.09	94	90	101	94
-11.22	98	100	99	88	107	116	121		-10.57	97	102	103	95	122	123	95	135	116		-12.22	95	100	100	-12.22	86	106	111	112	88	78			-11.22	93	97	96	92.5353	100.031	90.7982	99.2375	92	108	89		-10.57	92	95	97	101
-11.89	107	108	102	92	98	98	106		-11.06	98	98	108	102	112	110	101	120	108		-12.89	95	101	104	-12.89	75	95	96	98	95	86			-11.89	94	100	95	97.2922	98.6959	98.1471	103.73	100	103	70		-11.06	95	96	93	99
[truncated: 13 more columns]
