# Supplementary material for: Effector membrane translocation biosensors reveal G protein and βarrestin coupling profiles of 100 therapeutically relevant GPCRs
Source: eLife. 2022 Mar 18;11:e74101. doi: 10.7554/eLife.74101 (PMC9005190; doi:10.7554/eLife.74101)
Supplement: Figure 2—source data 1. [file elife-74101-fig2-data1.xlsx]

## Sheet: Figure 2
Source data for Figure 2
Figure 2A, left (D2 receptor and the Gαi/o family-specific sensor +/- UBO)
Log [Dopamine], M	Gi1			Gi2			GoA			GoB			Gz			Gi1_UBO			Gi2_UBO			GoA_UBO			GoB_UBO			Gz_UBO
-4.22	0.359	0.38	0.414	0.566	0.593	0.616	0.282	0.264	0.287	0.588	0.573	0.573	0.803	0.811	0.775	0.348	0.376	0.381	0.533	0.583	0.551	0.291	0.267	0.285	0.547	0.618	0.56	0.832	0.775	0.766
-4.97	0.369	0.405	0.408	0.517	0.573	0.581	0.29	0.265	0.291	0.563	0.597	0.554	0.822	0.796	0.756	0.342	0.369	0.368	0.493	0.567	0.524	0.275	0.269	0.274	0.5	0.564	0.582	0.829	0.772	0.741
-5.73	0.41	0.384	0.407	0.542	0.558	0.557	0.278	0.26	0.278	0.565	0.573	0.542	0.827	0.784	0.764	0.352	0.377	0.374	0.508	0.533	0.508	0.29	0.268	0.279	0.577	0.596	0.572	0.801	0.793	0.756
-6.47	0.348	0.355	0.375	0.495	0.534	0.528	0.293	0.254	0.278	0.518	0.515	0.495	0.759	0.771	0.766	0.33	0.365	0.341	0.484	0.508	0.486	0.273	0.267	0.274	0.546	0.609	0.543	0.804	0.741	0.743
-7.22	0.324	0.351	0.361	0.461	0.49	0.506	0.262	0.248	0.266	0.51	0.52	0.498	0.777	0.761	0.718	0.309	0.323	0.332	0.44	0.49	0.479	0.292	0.26	0.272	0.549	0.567	0.557	0.782	0.754	0.718
-8.22	0.194	0.191	0.205	0.253	0.236	0.249	0.226	0.206	0.22	0.428	0.398	0.397	0.515	0.502	0.496	0.189	0.178	0.187	0.259	0.231	0.253	0.234	0.212	0.222	0.444	0.441	0.472	0.518	0.476	0.498
-9.16	0.165	0.165	0.17	0.219	0.208	0.217	0.19	0.182	0.19	0.311	0.274	0.292	0.45	0.441	0.424	0.163	0.162	0.164	0.217	0.203	0.219	0.195	0.182	0.187	0.34	0.291	0.305	0.445	0.426	0.414
-10.1	0.164	0.168	0.165	0.212	0.201	0.212	0.18	0.173	0.182	0.24	0.231	0.233	0.446	0.4	0.422	0.161	0.164	0.16	0.205	0.197	0.216	0.176	0.175	0.18	0.253	0.239	0.252	0.414	0.42	0.401
-11.02	0.161	0.167	0.167	0.21	0.204	0.209	0.176	0.169	0.176	0.236	0.223	0.226	0.439	0.404	0.419	0.158	0.163	0.164	0.205	0.195	0.207	0.179	0.175	0.181	0.241	0.236	0.235	0.412	0.423	0.409
-11.92	0.168	0.168	0.165	0.212	0.201	0.212	0.178	0.172	0.18	0.23	0.221	0.23	0.439	0.41	0.414	0.162	0.161	0.162	0.207	0.199	0.207	0.174	0.173	0.179	0.234	0.228	0.235	0.421	0.408	0.401
-12.89	0.16	0.162	0.167	0.209	0.184	0.21	0.181	0.174	0.181	0.239	0.22	0.231	0.449	0.415	0.417	0.161	0.158	0.161	0.201	0.193	0.21	0.181	0.174	0.179	0.234	0.234	0.233	0.424	0.408	0.397
Vehicle	0.16	0.168	0.16	0.204	0.205	0.213	0.18	0.171	0.182	0.231	0.223	0.227	0.43	0.399	0.384	0.16	0.161	0.165	0.217	0.195	0.209	0.182	0.175	0.178	0.228	0.221	0.228	0.417	0.394	0.393
Figure 2A, right (D2 receptor and the Gαi/o family-specific sensor +/- PTX)
Log [Dopamine], M	Gi1			Gi2			GoA			GoB			Gz			Gi1_PTX			Gi2_PTX			GoA_PTX			GoB_PTX			Gz_PTX
-4.22	0.359	0.38	0.414	0.566	0.593	0.616	0.282	0.264	0.287	0.588	0.573	0.573	0.803	0.811	0.775	0.16	0.161	0.162	0.183	0.188	0.194	0.167	0.173	0.169	0.185	0.185	0.185	0.801	0.786	0.801
-4.97	0.369	0.405	0.408	0.517	0.573	0.581	0.29	0.265	0.291	0.563	0.597	0.554	0.822	0.796	0.756	0.162	0.161	0.162	0.185	0.19	0.187	0.171	0.171	0.168	0.187	0.185	0.188	0.713	0.698	0.731
-5.73	0.41	0.384	0.407	0.542	0.558	0.557	0.278	0.26	0.278	0.565	0.573	0.542	0.827	0.784	0.764	0.168	0.162	0.163	0.184	0.184	0.19	0.168	0.17	0.166	0.188	0.19	0.189	0.773	0.709	0.734
-6.47	0.348	0.355	0.375	0.495	0.534	0.528	0.293	0.254	0.278	0.518	0.515	0.495	0.759	0.771	0.766	0.165	0.159	0.161	0.186	0.186	0.188	0.168	0.174	0.167	0.183	0.19	0.187	0.736	0.69	0.783
-7.22	0.324	0.351	0.361	0.461	0.49	0.506	0.262	0.248	0.266	0.51	0.52	0.498	0.777	0.761	0.718	0.159	0.159	0.16	0.187	0.18	0.194	0.168	0.169	0.166	0.187	0.188	0.184	0.722	0.703	0.728
-8.22	0.194	0.191	0.205	0.253	0.236	0.249	0.226	0.206	0.22	0.428	0.398	0.397	0.515	0.502	0.496	0.162	0.164	0.159	0.183	0.185	0.191	0.162	0.166	0.166	0.185	0.182	0.184	0.545	0.541	0.56
-9.16	0.165	0.165	0.17	0.219	0.208	0.217	0.19	0.182	0.19	0.311	0.274	0.292	0.45	0.441	0.424	0.161	0.165	0.16	0.187	0.184	0.189	0.168	0.169	0.166	0.182	0.187	0.183	0.517	0.514	0.503
-10.1	0.164	0.168	0.165	0.212	0.201	0.212	0.18	0.173	0.182	0.24	0.231	0.233	0.446	0.4	0.422	0.162	0.163	0.163	0.185	0.189	0.191	0.17	0.17	0.169	0.185	0.188	0.181	0.523	0.521	0.501
-11.02	0.161	0.167	0.167	0.21	0.204	0.209	0.176	0.169	0.176	0.236	0.223	0.226	0.439	0.404	0.419	0.161	0.164	0.161	0.185	0.183	0.19	0.171	0.168	0.167	0.186	0.186	0.182	0.492	0.515	0.502
-11.92	0.168	0.168	0.165	0.212	0.201	0.212	0.178	0.172	0.18	0.23	0.221	0.23	0.439	0.41	0.414	0.161	0.162	0.158	0.185	0.184	0.195	0.169	0.169	0.169	0.187	0.186	0.178	0.495	0.523	0.472
-12.89	0.16	0.162	0.167	0.209	0.184	0.21	0.181	0.174	0.181	0.239	0.22	0.231	0.449	0.415	0.417	0.161	0.161	0.159	0.179	0.183	0.185	0.169	0.169	0.167	0.184	0.184	0.182	0.472	0.474	0.487
Vehicle	0.16	0.168	0.16	0.204	0.205	0.213	0.18	0.171	0.182	0.231	0.223	0.227	0.43	0.399	0.384	0.161	0.16	0.159	0.188	0.197	0.185	0.169	0.179	0.168	0.191	0.183	0.185	0.448	0.437	0.418
Figure 2A, inset (Emax values determined from dose-response curves of inhibitor-pretreated cells)
Gi1	Gi2	GoA	GoB	Gz	Gi1_UBO	Gi2_UBO	GoA_UBO	GoB_UBO	Gz_UBO	Gi1_PTX	Gi2_PTX	GoA_PTX	GoB_PTX	Gz_PTX
95	92	106	99	99	87	93	98	92	110	1	-0.6	-1.9	-0.1	74.3
97	104	90	104	104	98	96	102	103	94	-0.4	-2.4	-1.2	-1.1	59.3
108	103	104	97	97	86	85	93	100	99	1.3	2.5	-10.1	1.7	80.3
Figure 2B, left (GnRHR receptor and the Gαq/11 family-specific sensor +/- UBO)
Log [LHRH], M	Gq			G11			G14			G15			Gq_UBO			G11_UBO			G14_UBO			G15_UBO
-5.22	0.598	0.549	0.509	0.674	0.589	0.564	0.365	0.344	0.334	0.339	0.328	0.334	0.246	0.243	0.255	0.277	0.261	0.266	0.219	0.22	0.216	0.286	0.281	0.265
-5.88	0.637	0.55	0.479	0.671	0.58	0.519	0.347	0.329	0.311	0.311	0.319	0.318	0.244	0.228	0.232	0.276	0.257	0.254	0.209	0.212	0.204	0.264	0.273	0.253
-6.54	0.614	0.525	0.476	0.631	0.571	0.522	0.332	0.326	0.299	0.31	0.316	0.313	0.239	0.237	0.233	0.259	0.266	0.26	0.214	0.209	0.21	0.26	0.271	0.258
-7.19	0.567	0.512	0.432	0.578	0.535	0.495	0.33	0.308	0.302	0.308	0.317	0.31	0.231	0.229	0.228	0.261	0.255	0.271	0.214	0.21	0.213	0.277	0.254	0.245
-7.86	0.589	0.486	0.427	0.575	0.549	0.527	0.31	0.296	0.291	0.305	0.303	0.307	0.224	0.225	0.23	0.259	0.251	0.266	0.202	0.207	0.209	0.266	0.253	0.239
-8.52	0.523	0.451	0.402	0.594	0.523	0.463	0.3	0.278	0.274	0.277	0.275	0.279	0.237	0.23	0.231	0.266	0.261	0.26	0.205	0.209	0.207	0.246	0.242	0.234
-9.14	0.441	0.411	0.368	0.447	0.424	0.407	0.267	0.26	0.256	0.229	0.236	0.238	0.225	0.231	0.223	0.241	0.233	0.238	0.214	0.209	0.205	0.215	0.206	0.198
-9.84	0.322	0.307	0.283	0.308	0.31	0.294	0.228	0.225	0.224	0.204	0.198	0.2	0.227	0.227	0.232	0.228	0.231	0.23	0.205	0.213	0.209	0.187	0.191	0.192
-10.52	0.258	0.245	0.244	0.242	0.247	0.244	0.207	0.216	0.215	0.194	0.191	0.19	0.22	0.228	0.225	0.213	0.217	0.224	0.205	0.208	0.212	0.187	0.181	0.185
-11.22	0.247	0.243	0.235	0.235	0.226	0.233	0.215	0.214	0.212	0.185	0.187	0.188	0.23	0.226	0.227	0.216	0.219	0.227	0.203	0.211	0.211	0.18	0.184	0.184
-11.89	0.247	0.234	0.224	0.237	0.233	0.228	0.219	0.217	0.213	0.182	0.184	0.189	0.224	0.229	0.222	0.225	0.226	0.223	0.208	0.214	0.207	0.186	0.186	0.185
Vehicle	0.252	0.241	0.235	0.23	0.225	0.233	0.211	0.213	0.211	0.186	0.184	0.185	0.227	0.223	0.227	0.227	0.221	0.236	0.201	0.21	0.21	0.183	0.182	0.187
Figure 2B, right (GnRHR receptor and the Gαq/11 family-specific sensor +/- PTX)
Log [LHRH], M	Gq			G11			G14			G15			Gq_PTX			G11_PTX			G14_PTX			G15_PTX
-5.22	0.598	0.549	0.509	0.674	0.589	0.564	0.365	0.344	0.334	0.339	0.328	0.334	0.526	0.47	0.402	0.534	0.565	0.421	0.312	0.322	0.289	0.301	0.331	0.297
-5.88	0.637	0.55	0.479	0.671	0.58	0.519	0.347	0.329	0.311	0.311	0.319	0.318	0.441	0.453	0.437	0.525	0.464	0.437	0.296	0.306	0.306	0.308	0.305	0.324
-6.54	0.614	0.525	0.476	0.631	0.571	0.522	0.332	0.326	0.299	0.31	0.316	0.313	0.464	0.396	0.398	0.541	0.464	0.429	0.29	0.315	0.29	0.284	0.323	0.34
-7.19	0.567	0.512	0.432	0.578	0.535	0.495	0.33	0.308	0.302	0.308	0.317	0.31	0.499	0.396	0.397	0.464	0.465	0.414	0.283	0.292	0.293	0.297	0.292	0.309
-7.86	0.589	0.486	0.427	0.575	0.549	0.527	0.31	0.296	0.291	0.305	0.303	0.307	0.44	0.385	0.406	0.484	0.445	0.406	0.276	0.278	0.299	0.282	0.293	0.342
-8.52	0.523	0.451	0.402	0.594	0.523	0.463	0.3	0.278	0.274	0.277	0.275	0.279	0.385	0.37	0.386	0.448	0.426	0.401	0.262	0.298	0.301	0.258	0.28	0.314
-9.14	0.441	0.411	0.368	0.447	0.424	0.407	0.267	0.26	0.256	0.229	0.236	0.238	0.348	0.334	0.358	0.434	0.362	0.37	0.245	0.247	0.282	0.231	0.236	0.304
-9.84	0.322	0.307	0.283	0.308	0.31	0.294	0.228	0.225	0.224	0.204	0.198	0.2	0.282	0.27	0.314	0.287	0.268	0.299	0.217	0.221	0.27	0.198	0.205	0.281
-10.52	0.258	0.245	0.244	0.242	0.247	0.244	0.207	0.216	0.215	0.194	0.191	0.19	0.238	0.231	0.297	0.248	0.245	0.293	0.208	0.214	0.253	0.189	0.197	0.27
-11.22	0.247	0.243	0.235	0.235	0.226	0.233	0.215	0.214	0.212	0.185	0.187	0.188	0.235	0.225	0.28	0.242	0.233	0.275	0.206	0.207	0.253	0.183	0.195	0.283
-11.89	0.247	0.234	0.224	0.237	0.233	0.228	0.219	0.217	0.213	0.182	0.184	0.189	0.227	0.228	0.274	0.238	0.23	0.272	0.207	0.206	0.264	0.188	0.191	0.269
Vehicle	0.252	0.241	0.235	0.23	0.225	0.233	0.211	0.213	0.211	0.186	0.184	0.185	0.224	0.22	0.289	0.228	0.225	0.29	0.206	0.208	0.265	0.182	0.185	0.254
Figure 2B, insets (Emax values determined from dose-response curves of inhibitor-pretreated cells)
Gq	G11	G14	G15	Gq_UBO	G11_UBO	G14_UBO	G15_UBO	Gq_PTX	G11_PTX	G14_PTX	G15_PTX
115	116	111	100	5	14	11	66	73	71	71	86
98	98	101	101	5	11	8	67	83	81	80	95
86	86	88	99	7	12	8	62	48	48	32	40
Figure 2C, letf top (CB1 receptor and the Gα12/13 family-specific sensor +/- UBO)
Log [WIN55,212-2], M	G12				G13				G12_UBO				G13_UBO
-4.22	0.184	0.182	0.185	0.183	0.221	0.219	0.225	0.216	0.183	0.182	0.183	0.189	0.22	0.219	0.221	0.229
-4.97	0.19	0.184	0.186	0.178	0.216	0.213	0.215	0.204	0.184	0.183	0.18	0.182	0.209	0.217	0.214	0.217
-5.73	0.196	0.185	0.18	0.187	0.208	0.192	0.193	0.193	0.183	0.183	0.185	0.188	0.199	0.197	0.19	0.206
-6.47	0.185	0.181	0.18	0.19	0.189	0.189	0.184	0.196	0.183	0.183	0.183	0.19	0.184	0.182	0.187	0.189
-7.22	0.178	0.178	0.171	0.18	0.171	0.168	0.167	0.17	0.173	0.178	0.177	0.185	0.164	0.169	0.163	0.171
-8.22	0.166	0.165	0.161	0.166	0.155	0.158	0.155	0.158	0.164	0.163	0.164	0.168	0.158	0.155	0.158	0.161
-9.16	0.162	0.161	0.158	0.163	0.155	0.154	0.154	0.157	0.159	0.161	0.16	0.162	0.155	0.156	0.156	0.158
-10.1	0.161	0.161	0.158	0.162	0.156	0.156	0.153	0.157	0.158	0.159	0.159	0.16	0.156	0.155	0.156	0.156
-11.02	0.162	0.164	0.157	0.161	0.153	0.152	0.152	0.156	0.158	0.16	0.16	0.159	0.155	0.157	0.155	0.157
-11.92	0.158	0.161	0.158	0.16	0.157	0.153	0.154	0.155	0.16	0.16	0.159	0.161	0.156	0.155	0.156	0.159
-12.89	0.164	0.163	0.159	0.16	0.157	0.154	0.154	0.157	0.158	0.16	0.16	0.161	0.155	0.154	0.156	0.159
Vehicle	0.162	0.159	0.157	0.165	0.155	0.155	0.158	0.157	0.161	0.162	0.159	0.16	0.157	0.158	0.156	0.158
Figure 2C, right top (CB1 receptor and the Gα12/13 family-specific sensor +/- PTX)
Log [WIN55,212-2], M	G12				G13				G12_PTX				G13_PTX
-4.22	0.184	0.182	0.185	0.183	0.221	0.219	0.225	0.216	0.193	0.195	0.189	0.182	0.203	0.211	0.223	0.202
-4.97	0.19	0.184	0.186	0.178	0.216	0.213	0.215	0.204	0.182	0.183	0.18	0.178	0.186	0.198	0.2	0.205
-5.73	0.196	0.185	0.18	0.187	0.208	0.192	0.193	0.193	0.187	0.18	0.183	0.187	0.186	0.18	0.185	0.189
-6.47	0.185	0.181	0.18	0.19	0.189	0.189	0.184	0.196	0.175	0.186	0.183	0.188	0.173	0.178	0.185	0.188
-7.22	0.178	0.178	0.171	0.18	0.171	0.168	0.167	0.17	0.178	0.174	0.177	0.183	0.16	0.162	0.163	0.168
-8.22	0.166	0.165	0.161	0.166	0.155	0.158	0.155	0.158	0.166	0.161	0.162	0.17	0.154	0.154	0.16	0.163
-9.16	0.162	0.161	0.158	0.163	0.155	0.154	0.154	0.157	0.158	0.164	0.161	0.168	0.152	0.153	0.153	0.158
-10.1	0.161	0.161	0.158	0.162	0.156	0.156	0.153	0.157	0.16	0.159	0.161	0.166	0.152	0.154	0.155	0.157
-11.02	0.162	0.164	0.157	0.161	0.153	0.152	0.152	0.156	0.164	0.163	0.164	0.171	0.154	0.155	0.155	0.168
-11.92	0.158	0.161	0.158	0.16	0.157	0.153	0.154	0.155	0.161	0.162	0.164	0.17	0.154	0.158	0.154	0.164
-12.89	0.164	0.163	0.159	0.16	0.157	0.154	0.154	0.157	0.165	0.165	0.161	0.17	0.154	0.157	0.155	0.164
Vehicle	0.162	0.159	0.157	0.165	0.155	0.155	0.158	0.157	0.161	0.164	0.162	0.165	0.155	0.155	0.16	0.158
Figure 2C, insets (Emax values determined from dose-response curves of inhibitor-pretreated cells)
G12	G13	G12_UBO	G13_UBO	G12_PTX	G13_PTX
112.872	94.4476	88	100	103	78
87.7892	105.323	103	94	107	98
109.146	117.501	86	91	80	156
90.1933	82.7275	119	129	68	73
Figure 2C, letf bottom (CB1 receptor and the Gα12/13 family-specific sensor parental and devoid of G12/13 (ΔG12/13) HEK293 cells)
Log [WIN55,212-2], M	ΔG12/13				ΔG12/13_+G12				ΔG12/13_+G13
-4.22	0.154	0.155	0.155	0.153	0.188	0.189	0.196	0.194	0.262	0.263	0.282	0.287
-4.97	0.152	0.151	0.154	0.152	0.192	0.204	0.206	0.206	0.284	0.32	0.316	0.289
-5.73	0.152	0.156	0.153	0.155	0.207	0.228	0.229	0.225	0.28	0.323	0.321	0.298
-6.47	0.151	0.153	0.154	0.153	0.205	0.243	0.243	0.24	0.247	0.296	0.315	0.269
-7.22	0.15	0.157	0.156	0.151	0.208	0.246	0.24	0.223	0.205	0.241	0.226	0.219
-8.22	0.149	0.155	0.156	0.153	0.188	0.204	0.199	0.202	0.177	0.193	0.185	0.181
-9.16	0.151	0.154	0.153	0.155	0.174	0.192	0.186	0.178	0.171	0.185	0.182	0.171
-10.1	0.148	0.154	0.155	0.156	0.18	0.197	0.19	0.181	0.168	0.187	0.175	0.175
-11.02	0.151	0.159	0.153	0.153	0.178	0.19	0.188	0.187	0.169	0.184	0.177	0.176
-11.92	0.149	0.156	0.155	0.156	0.178	0.193	0.19	0.186	0.167	0.189	0.181	0.176
-12.89	0.146	0.158	0.157	0.153	0.174	0.189	0.185	0.183	0.174	0.187	0.183	0.172
Vehicle	0.151	0.158	0.155	0.155	0.179	0.183	0.188	0.19	0.166	0.181	0.185	0.182
Figure 2C, right bottom (CB1 receptor and PKN-RBD-RlucII/rGFP-CAAX)
Log [WIN55,212-2], M	HEK293				ΔG12/13
-4.22	0.271	0.264	0.256	0.263	0.21	0.205	0.201	0.203
-4.97	0.242	0.254	0.235	0.24	0.199	0.193	0.191	0.19
-5.73	0.251	0.253	0.244	0.247	0.203	0.196	0.189	0.203
-6.47	0.243	0.249	0.252	0.24	0.199	0.196	0.196	0.203
-7.22	0.228	0.24	0.237	0.234	0.201	0.201	0.196	0.205
-8.22	0.211	0.21	0.215	0.213	0.204	0.198	0.197	0.194
-9.16	0.209	0.214	0.211	0.204	0.204	0.196	0.195	0.202
-10.1	0.207	0.204	0.204	0.2	0.207	0.199	0.197	0.207
-11.02	0.206	0.205	0.207	0.201	0.205	0.202	0.199	0.196
-11.92	0.206	0.206	0.2	0.2	0.203	0.205	0.201	0.204
-12.89	0.208	0.199	0.197	0.204	0.199	0.208	0.196	0.199
Vehicle	0.191	0.2	0.205	0.205	0.2	0.202	0.199	0.207
Figure 2D, left (GPBA receptor and the Gαs activation sensor +/- UBO or PTX)
Log [Acid Lithocholic], M	Gs				Gs_UBO				Gs_PTX
-4.22	0.455	0.445	0.457	0.441	0.457	0.463	0.49	0.488	0.422	0.438	0.46	0.47
-4.97	0.567	0.528	0.547	0.532	0.553	0.556	0.583	0.555	0.511	0.512	0.518	0.512
-5.73	0.67	0.64	0.674	0.674	0.672	0.702	0.728	0.708	0.618	0.634	0.651	0.644
-6.47	0.846	0.793	0.804	0.8	0.818	0.852	0.88	0.865	0.795	0.775	0.763	0.799
-7.22	0.887	0.891	0.963	0.893	0.953	0.998	1.001	0.977	0.877	0.871	0.905	0.921
-8.22	1	0.964	0.977	0.94	0.987	1.016	1.077	1.064	0.955	0.924	1.017	0.924
-9.16	1.034	1.042	0.994	0.966	0.95	0.992	1.056	0.991	0.943	0.946	0.966	0.874
-10.1	0.995	1.027	0.994	0.893	1.017	1.002	1.085	1.057	0.957	0.964	1.052	0.986
-11.02	1.08	0.96	0.99	0.987	0.985	0.976	1.094	1.109	0.936	0.926	1.033	0.99
-11.92	1.081	0.993	0.99	0.937	0.958	1	1.005	0.975	0.906	0.967	0.98	1.019
-12.89	1.039	0.992	1.02	0.967	1.007	0.987	1.016	1.053	0.905	0.909	0.967	0.966
Vehicle	1.04	1.012	0.933	0.846	0.971	1.021	1.095	1.05	0.946	0.866	1	0.941
Figure 2D, central (GPBA receptor and the Gαs activation sensor +/- CTX)							Figure 2D, right (GPBA receptor and EPAC sensor )
Log [Cholera Toxin], ng/ml	Gs						Log [Acid Lithocholic], M	EPAC
Vehicle	1.553	1.567	1.655	1.59			-4.22	0.341	0.376	0.354	0.363
2.3	0.496	0.456	0.53	0.477			-4.97	0.407	0.383	0.405	0.418
2	0.611	0.5	0.566	0.536			-5.73	0.422	0.387	0.404	0.429
1.7	0.686	0.564	0.672	0.584			-6.47	0.442	0.435	0.438	0.433
1.4	0.723	0.585	0.746	0.652			-7.22	0.479	0.47	0.489	0.483
1	0.941	0.828	0.978	0.828			-8.22	0.476	0.484	0.489	0.497
0.7	1.165	0.985	1.213	1.073			-9.16	0.486	0.483	0.483	0.502
0.4	1.344	1.14	1.343	1.141			-10.1	0.483	0.469	0.498	0.503
0	1.486	1.304	1.442	1.319			-11.02	0.486	0.504	0.497	0.51
-0.3	1.503	1.453	1.531	1.383			-11.92	0.472	0.481	0.497	0.492
-0.6	1.675	1.598	1.639	1.506			-12.89	0.477	0.476	0.485	0.511
-1	1.652	1.542	1.688	1.605			Vehicle	0.476	0.472	0.478	0.49
