# Supplementary material for: Effector membrane translocation biosensors reveal G protein and βarrestin coupling profiles of 100 therapeutically relevant GPCRs
Source: eLife. 2022 Mar 18;11:e74101. doi: 10.7554/eLife.74101 (PMC9005190; doi:10.7554/eLife.74101)
Supplement: Figure 3—figure supplement 2—source data 1. [file elife-74101-fig3-figsupp2-data1.xlsx]

## Sheet: Figure 3- figure supplement 2
Source data for Figure 3- figure supplement 2
3-HOA and HCAR3: Gz											Somatostatin-14 and SST2A: Gz									SNC80 and DOR: Gz												Zn2+ and GPR39: Gz
Log [3-HOA], M	Endogenous				+ HCA3						Log [Somatostatin-14], M	Endogenous			+ SST2A					Log [SNC80], M	Endogenous			+ δOR								Log [Zn2+], M	Endogenous			+ GPR39
-3.22	172	169	178		255	318	246	297			-7.16	157	179	196	349	321	354			-4.82	153	128	124	245	271	180	192	180	181			-3.68752	149.236	149.26	152.173	133	137	153	140	147
-3.88	157	157	169		259	298	255	252			-7.62	133	136	177	315	349	384			-5.57	138	129	132	226	248	178	173	160	177			-4.15517	152.664	137.971	151.53	124	128	139	122	144
-4.54	147	148	158		215	261	267	242			-8.09	117	142	154	366	346	328			-6.33	152	138	120	226	241	180	171	175	172			-4.62005	143.014	129.121	141.131	120	122	122	118	133
-5.19	120	131	122		186	205	228	170			-8.55	112	129	134	326	304	321			-7.07	142	133	123	237	240	179	164	175	173			-5.07997	116.393	110.969	113.939	109	105	108	113	117
-5.86	103	115	122		125	132	147	118			-9.02	81	119	118	324	307	329			-7.82	133	125	120	234	240	167	157	172	166			-5.55287	102.962	96.2313	104.216	109	97	96	108	106
-6.52	103	116	113		104	110	114	110			-9.66	80	106	108	304	326	339			-8.82	122	113	110	236	238	173	160	157	167			-6.02178	104.918	99.0012	102.694	103	111	100	108	100
-7.14	110	112	105		97	111	104	103			-10.31	95	112	101	289	270	355			-9.76	114	110	106	209	215	156	151	145	160			-6.49499	106.352	100.952	104.335	106	97	99	106	99
-7.84	108	116	101		103	112	96	98			-10.95	95	112	102	263	229	294			-10.7	114	108	106	142	132	126	125	116	128			-6.92087	109.314	100.377	107.835	102	88	104	96	95
-8.52	109	117	101		98	106	89	105			-11.6	96	107	100	174	162	181			-11.62	105	105	117	108	103	96	104	103	102			-7.39796	105.458	95.0642	107.277	104	93	96	96	93
-9.22	106	116	113		98	97	92	103			-12.22	92	120	114	130	131	120			-12.52	105	108	98	96	104	103	107	93	100			-7.58504	104.024	101.667	100.597	104	90	100	98	93
-9.89	106	102	101		99	95	92	100			-12.89	111	108	112	113	118	109			-13.49	115	102	100	97	97	97	101	95	98			-9.09691	99.4039	99.8722	102.542		93	95	100	91
Vehicle	100	100	100		100	100	100	100			Vehicle	100	100	100	100	100	100			Vehicle	100	100	100	100	100	100	100	100	100			Vehicle	96.5723	98.4612	96.8604	100	100	100	100	100
CXCL12 and CXCR4: Gi2											UTP and P2Y2R: G14
Log [CXCL12], M	Endogenous			Log [CXCL12], M	+CXCR4						Log [UTP], M	Endogenous			+ P2Y2
-6.99944	161.931	156.754	178.909	-7	262	282	350				-3.22	133	126	125	127	119	133	112	125.931	127.315
-7.43582	165.897	160.344	162.343	-7.47	270	291	350				-3.88	134	116	122	127	113	129	115	124.274	119.361
-7.87022	168.183	168.305	162.928	-7.93	253	254	316				-4.54	120	104	115	127	114	122	120	117.84	128.129
-8.30612	162.469	160.148	160.069	-8.4	241	255	296				-5.19	103	93	112	126	117	133	121	119.154	124.931
-8.7603	161.461	155.449	157.861	-8.87	220	232	247				-5.86	99	92	98	115	111	125	114	112.393	114.927
-9.17961	147.479	149.054	146.687	-9.33	191	177	170				-6.52	95	93	102	108	98	106	104	105.645	113.392
-9.61893	140.152	146.248	146.557	-9.8	145	129	118				-7.14	98	96	105	105	98	99	92	98.083	96.936
-10.0613	131.884	135.349	134.994	-10.27	107	103	110				-7.84	103	94	99	99	95	91	97	96.765	88.026
-10.4763	117.768	125.756	115.115	-10.7	95	95	107				-8.52	102	94	99	97	90	97	94	102.336	99.479
-10.8742	107.417	105.395	108.034	-11.18	95	98	101				-9.22	106	95	103	102	90	95	93	90.256	96.088
-11.3623	100.022	100.37	97.8995	-11.66	93	99	98				-9.89	110	101	96	103	89	98	96	87.99	95.344
Vehicle	92.5611	94.2354	94.0667	-13	100	100	100				Vehicle	100	100	100	100	100	100	100	100	100
Acetylcholine and MRs: Gq																										Acetylcholine and MRs: G11
Log [Acetylcholine], M	Endogenous			+M1					+M2					+M3				+M4								Log [Acetylcholine], M	Endogenous			+M1					+M2					+M3				+M4
-4.22	122	113	128	574	637	601	624	654	160	144	140	149	140	752	684	723	615	142	154	167	204	180	191			-4.22	160	139	172	543	614	635	704	731	158	142	162	159	158	795	768	1038	857	144	166	179	163	233	171
-4.88	117	114	139	541	672	597	644	678	145	135	132	139	142	787	698	801	644	133	149	181	187	173	179			-4.88	154	134	159	539	645	686	703	719	160	129	150	140	151	774	759	982	899	137	161	178	163	204	159
-5.54	115	104	130	588	685	653	674	662	135	117	109	122	122	761	670	767	621	122	136	137	171	160	152			-5.54	147	124	149	544	654	707	770	770	134	111	132	121	134	807	771	1053	884	123	145	154	132	177	134
-6.19	99	95	122	627	710	666	645	692	123	103	103	107	101	656	596	709	577	110	115	117	131	127	136			-6.19	124	112	132	590	765	748	848	856	113	102	110	103	108	742	704	998	915	102	116	130	110	145	113
-6.86	95	94	108	610	695	673	630	667	112	102	96	102	103	535	491	609	497	95	106	100	119	125	134			-6.86	101	98	118	657	780	823	933	915	110	94	102	97	98	606	568	880	757	96	102	118	96	123	102
-7.52	88	89	109	469	565	566	472	487	109	100	99	102	101	338	320	427	357	99	101	94	109	102	112			-7.52	100	89	109	599	635	711	708	717	113	94	94	93	98	409	340	634	572	92	103	105	85	122	113
-8.14	87	86	105	208	204	290	217	220	107	97	96	94	96	200	172	273	230	92	99	95	97	101	107			-8.14	93	92	103	247	223	375	340	305	106	97	96	94	93	191	173	338	312	94	95	109	86	105	105
-8.84	92	87	104	116	116	126	135	115	109	97	91	97	103	127	114	155	140	95	111	102	98	104	94			-8.84	91	87	103	110	106	158	152	140	103	101	93	97	95	129	119	162	154	92	103	95	81	132	101
-9.52	86	83	101	99	98	110	116	97	112	100	100	99	98	121	106	120	109	95	104	97	107	118	106			-9.52	92	90	108	92	90	115	111	112	109	98	99	96	100	108	112	114	118	93	103	106	80	105	95
-10.22	94	88	101	101	102	97	113	95	103	95	93	101	102	109	106	115	105	98	110	97	98	114	118			-10.22	92	91	104	96	90	96	108	103	104	99	104	99	100	106	102	102	103	96	105	102	91	86	101
-10.89	94	92	102	97	95	104	113	98	101	96	98	99	99	111	99	108	101	99	106	96	115	147	105			-10.89	95	92	102	86	89	98	108	105	96	97	98	103	100	109	107	102	104	102	98	88	95	117	104
Vehicle	100	100	100	100	100	100	100	100	100	100	100	100	100	100	100	100	100	100	100	100	100	100	100			Vehicle	100	100	100	100	100	100	100	100	100	100	100	100	100	100	100	100	100	100	100	100	100	100	100
Dopamine and DRs: GoA																						Dopamine and DRs: GoB																										Dopamine and DRs: Gz
Log [Dopamine], M	Endogenous			+D1						+D2					+D5							Log [Dopamine], M	Endogenous						+D1					+D2						+D5								Log [Dopamine], M	Endogenous
-4.22	132	159	118	136	136	121	114	132	124	349	308	366	339	343	149	160	138	167	123	122		-4.22	165	179	153	112.281	121.763	119.335	285	327	228	211	198	435	418	473	425	489	407	228	206	175	238	173	194			-4.22	162
-4.97	137	159	115	128	126	115	117	117	115	309	308	367	378	367	139	162	133	172	126	124		-4.97	158	167	140	111.296	119.967	118.868	246	280	216	213	193	463	396	477	422	481	408	202	204	171	235	172	153			-4.97	142
-5.73	148	137	111	113	118	110	110	113	106	335	304	357	345	349	142	159	122	173	115	119		-5.73	161	155	133	109.325	117.573	107.028	180	204	160	143	141	436	388	449	431	482	398	186	204	170	227	170	162			-5.73	132
-6.47	149	135	119	90	102	106	101	99	96	343	310	347	323	347	126	155	114	150	118	110		-6.47	137	133	120	104.124	107.726	104.483	128	157	112	103	106	474	394	471	397	452	391	170	174	145	201	155	150			-6.47	109
-7.22	125	122	101	90	95	95	101	97	97	350	298	342	333	357	112	134	109	133	114	107		-7.22	126	121	114	101.715	104.516	106.405	104	128	93	104	99	483	388	426	405	456	384	130	147	132	152	129	126			-7.22	106
-8.22	99	114	100	86	89	88	95	96	91	284	225	281	247	228	78	110	97	98	92	85		-8.22	118	117	109	100.401	100.218	95.811	95	114	91	95	97	445	349	426	348	385	338	100	122	119	103	108	94			-8.22	104
-9.16	123	127	104	91	98	104	96	100	88	212	158	211	162	149	92	109	103	101	104	92		-9.16	130	119	114	108.339	107.182	100.277	95	118	100	100	98	320	230	305	247	249	194	102	107	108	99	109	99			-9.16	112
-10.1	133	125	114	90	93	100	100	95	90	121	105	126	105	104	93	107	99	100	97	92		-10.1	135	121	123	103.248	108.487	104.795	95	110	111	103	101	176	122	159	121	131	118	99	106	106	100	108	106			-10.1	99
-11.02	128	102	108	91	99	101	101	103	91	113	101	103	108	100	85	125	92	105	95	97		-11.02	126	117	119	98.3759	102.339	99.9654	99	104	104	104	98	129	106	108	101	105	100	97	103	111	97	107	101			-11.02	100
-11.92	124	127	115	91	95	100	104	103	96	108	102	116	107	101	93	125	94	102	107	94		-11.92	124	121	120	102.099	102.176	106.041	96	106	100	102	99	134	111	101	103	102	104	95	111	110	95	102	98			-11.92	103
-12.89	109	128	117	91	96	97	92	95	93	103	95	105	105	104	95	112	99	103	97	96		-12.89	110	111	120	101.496	98.6942	99.8615	88	101	93	100	97	118	103	100	99	91	102	95	104	106	95	104	97			-12.89	99
Vehicle	100	100	100	100	100	100	100	100	100	100	100	100	100	100	100	100	100	100	100	100		Vehicle	100	100	100	96.4051	99.1295	94.0973	100	100	100	100	100	100	100	100	100	100	100	100	100	100	100	100	100			Vehicle	100
Noradrenaline and ARs: Gi2																																		Noradrenaline and ARs: GoA
Log [Noradrenaline], M	Endogenous			+α1AAR					+α2AAR						+α2BAR			+α2CAR				+ß1AR						+ß2AR						Log [Noradrenaline], M	Endogenous			+α1AAR			+α2AAR						+α2BAR
-4.22	106	106	108	116	126	125	106	119	505	344	682	667	642	667	405	424	389	402	517	483	567	147	135	133	119	131	121	118	110	102	93	106		-4.22	121	123	125	125	141	143	423	287	312	244	275	291	336	264	282
-4.88	99	109	104	113	130	141	116	100	517	462	666	657	647	608	446	437	408	419	525	463	522	152	135	130	118	127	116	120	113	99	99	107		-4.88	125	129	130	129	110	163	460	408	342	257	311	315	352	333	276
-5.54	104	113	102	119	131	151	112	124	523	486	648	650	626	624	440	437	405	383	475	470	539	139	134	118	109	120	117	115	115	105	100	113		-5.54	101	126	127	132	135	172	420	399	367	259	307	339	335	359	297
-6.19	97	115	98	108	123	140	103	108	520	484	658	612	606	614	419	414	402	380	481	477	525	134	122	110	104	107	109	114	117	101	97	109		-6.19	101	126	120	127	136	146	441	413	355	251	351	329	332	343	303
-6.86	96	109	94	116	125	119	94	106	555	460	678	649	616	607	393	374	369	325	485	465	461	126	112	103	100	105	104	118	110	98	94	102		-6.86	104	110	113	119	129	131	405	391	356	263	314	298	363	318	251
-7.52	90	98	92	110	112	117	101	106	535	473	656	625	604	581	277	262	294	300	451	438	417	114	108	101	93	95	94	115	102	98	89	102		-7.52	126	103	111	115	114	114	419	403	351	256	319	295	330	303	229
-8.14	101	100	90	101	106	126	103	100	490	429	549	535	505	467	181	170	189	283	434	389	476	105	102	98	95	98	99	107	106	106	95	105		-8.14	118	113	100	116	111	129	406	349	334	241	295	277	271	250	185
-8.84	90	94	90	100	114	122	88	105	344	264	278	247	241	222	117	123	119	199	294	290	359	102	101	96	96	95	100	113	101	91	92	106		-8.84	114	102	92	100	94	114	317	259	246	173	208	178	157	151	144
-9.52	92	97	87	105	107	117	100	108	167	143	132	130	125	131	109	111	105	128	178	174	207	97	103	94	88	99	98	104	103	100	97	106		-9.52	126	95	90	98	106	115	162	138	139	116	134	136	110	126	124
-10.22	97	98	97	97	107	116	99	103	116	103	111	108	107	108	104	100	100	108	118	130	137	107	101	101	99	99	96	104	102	95	94	109		-10.22	124	101	100	100	102	95	110	101	113	96	113	116	101	113	125
-10.89	97	101	97	96	101	104	104	99	114	96	110	103	102	110	106	117	102	101	108	108	119	104	101	102	103	99	100	108	101	98	98	104		-10.89	118	100	106	109	107	95	109	96	107	95	111	107	105	119	117
Vehicle	100	100	100	100	100	100	100	100	100	100	100	100	100	100	100	100	100	100	100	100	100	100	100	100	100	100	100	100	100	100	100	100		Vehicle	100	100	100	100	100	100	100	100	100	100	100	100	100	100	100
Noradrenaline and ARs: bArr2																															pH and GPRs: GoB
Log [Noradrenaline], M	Endogenous			+α1AAR			+α2AAR						+α2BAR				+α2CAR				+ß1AR						+ß2AR				Ligands (M)	Endogenous			Ligands (M)	+GPR4				Ligands (M)	+GPR65			+GPR68
-4.22	111	109	126	100	79	112	442	504	413	472	421	426	207	193	164	153	180	177	182	177	404	369	268	212	284	246	477	503	310		8.3	100.435	96.4674	95.4654	5.4	143	147	187	149	5.38	146	183	192	458	487	556	625	590
-4.88	104	104	110	109	76	111	460	512	371	439	385	421	211	178	143	153	150	170	163	176	398	360	263	219	288	246	324	334	228		7.53	108.783	107.065	110.549	6	129	133	163	141	6	126	153	163	458	475	547	605	574
-5.54	103	111	118	153	86	116	411	429	307	349	295	328	190	183	153	155	141	156	149	154	368	355	244	202	256	255	169	172	137		7.03	109.391	106.884	109.021	6.56	116	128	152	125	6.51	108	125	138	470	465	539	584	555
-6.19	93	105	115	127	90	104	295	313	201	230	220	241	193	162	132	140	137	138	124	150	333	308	201	191	218	211	120	116	111		6.6	107.652	107.79	106.539	7.15	109	106	130	113	7.1	75	86	93	430	444	425	538	524
-6.86	102	96	96	103	89	117	192	200	135	141	135	162	155	132	109	125	108	119	116	134	250	216	141	135	143	154	105	114	99		6.38	117.043	114.629	117.422	7.7	99	98	117	89	7.7	71	79	86	261	231	106	144	127
-7.52	96	95	100	115	101	118	125	144	117	123	109	126	138	117	97	110	92	110	96	123	165	154	121	103	120	121	102	107	104		6.15	115.696	120.109	127.924	8.2	101	105	118	93	8.2	84	89	103	153	130	88	112	110
-8.14	92	90	100	115	98	112	103	122	97	106	99	115	108	102	88	105	93	97	93	105	132	117	97	93	108	116	104	111	107		5.8	111.652	117.663	120.334	9.01	100	100	100	100	9.01	100	100	100	100	100	100	100	100
-8.84	92	89	103	103	99	106	90	119	99	91	102	102	118	103	91	104	94	96	98	100	116	101	96	94	106	104	117	112	109		5.37	140.174	145.697	157.327
-9.52	85	93	93	98	97	99	89	103	89	98	86	104	112	94	97	100	89	96	97	98	101	93	97	88	100	102	95	109	105		5	142.261	141.984	164.439
-10.22	89	96	107	113	95	106	92	98	91	95	95	99	94	107	103	100	99	98	104	102	105	95	92	94	102	106	107	102	111
-10.89	95	94	100	116	86	103	93	120	94	95	101	104	107	101	103	103	91	94	89	106	94	103	91	94	101	108	92	118	110
Vehicle	100	100	100	100	100	100	100	100	100	100	100	100	100	100	100	100	100	100	100	100	100	100	100	100	100	100	100	100	100
O-LPA and LPARs: Gi1												O-LPA and LPARs: Gi2														O-LPA and LPARs: GoA														O-LPA and LPARs: GoB
Log [O-LPA], M	Endogenous			+LPA1			+LPA2					Log [O-LPA], M	Endogenous			+LPA1					+LPA2					Log [O-LPA], M	Endogenous			+LPA1						+LPA2				Log [O-LPA], M	Endogenous			+LPA1					+LPA2
-5.22	173	125	173	246	230	225	438	491	344	453		-5.22	150	129	171	145	192	193	214	189	438	491	344	453		-5.22	121	129	149	163	226	215	204	189	212	219	282	328		-5.22	150	198	263	203	166	154	191	189	276
-5.88	157	129	174	238	226	229	442	462	344	459		-5.88	159	152	191	146	181	193	205	198	442	462	344	459		-5.88	133	127	162	169	261	215	201	216	220	266	288	353		-5.88	167	228	287	211	160	165	184	179	324
-6.54	147	124	169	227	219	228	397	422	336	426		-6.54	170	157	207	143	188	177	213	201	397	422	336	426		-6.54	121	131	150	172	211	222	207	194	210	237	283	283		-6.54	176	233	301	199	171	158	172	171	315
-7.19	138	134	171	240	215	223	401	375	319	403		-7.19	163	162	192	129	170	182	191	197	401	375	319	403		-7.19	112	125	144	160	220	221	212	175	204	213	230	266		-7.19	153	224	259	216	166	166	160	164	305
-7.86	129	125	177	183	195	222	317	334	304	360		-7.86	141	146	171	137	166	176	191	200	317	334	304	360		-7.86	117	137	137	163	192	213	211	167	183	201	218	235		-7.86	136	200	237	175	170	170	154	157	267
-8.52	113	119	133	180	183	229	247	257	223	260		-8.52	121	129	126	135	153	162	175	194	247	257	223	260		-8.52	94	104	109	147	159	181	191	180	165	193	174	211		-8.52	111	168	170	167	164	173	148	146	200
-9.14	106	104	111	195	156	181	326	235	174	191		-9.14	110	117	119	111	133	141	164	157	326	235	174	191		-9.14	90	93	101	118	153	145	155	146	142	173	162	167		-9.14	83	132	120	155	142	153	146	138	241
-9.84	106	97	106	128	123	136	193	148	123	127		-9.84	96	105	108	102	120	117	130	126	193	148	123	127		-9.84	86	96	97	103	123	121	131	120	111	108	131	135		-9.84	87	117	110	147	126	131	122	115	193
-10.52	105	99	94	116	103	118	136	122	103	110		-10.52	99	100	106	89	110	102	122	100	136	122	103	110		-10.52	93	98	100	97	112	112	117	99	102	85	105	125		-10.52	85	111	104	133	115	116	104	106	138
-11.22	117	100	100	104	104	107	113	115	93	103		-11.22	96	107	102	92	102	96	116	98	113	115	93	103		-11.22	99	99	97	94	114	106	116	101	89	97	117	114		-11.22	95	107	110	118	109	108	103	98	112
-11.89	115	98	98	106	115	99	118	122	105	97		-11.89	108	105	104	95	98	102	111	98	118	122	105	97		-11.89	99	101	92	100	111	111	101	96	99	81	106	105		-11.89	92	96	95	120	102	112	113	104	91
Vehicle	100	100	100	100	100	100	100	100	100	100		Vehicle	100	100	100	100	100	100	100	100	100	100	100	100		Vehicle	100	100	100	100	100	100	100	100	100	100	100	100		Vehicle	100	100	100	100	100	100	100	100	100
O-LPA and LPARs: G13															Sphingosine 1-phosphate and S1PR1: Gi1														Sphingosine 1-phosphate and S1PR1: Gi2													Sphingosine 1-phosphate and S1PR1: GoA
Log [O-LPA], M	Endogenous				+LPA1				+LPA2						Log [Sphingosine 1-phosphate], M	Endogenous				Log [Sphingosine 1-phosphate], M	+ S1P1								Log [Sphingosine 1-phosphate], M	Endogenous				Log [Sphingosine 1-phosphate], M	+ S1P1							Log [Sphingosine 1-phosphate], M	Endogenous				Log [Sphingosine 1-phosphate], M	+ S1P1
Vehicle	100	100	100	100	100	100	100	100	100	100	100	100			-5.22	215	154	186		-5.22	133	218	246	217	254	251	241		-5.22	193	143	168		-5.22	129	206	164	204	251	244		-5.22	180	127	162		-5.22	117	170
-5.22185	158	144	151	139	295	304	292	307	147		172	156			-5.88	180	131	182		-5.88	165	270	247	234	274	239	270		-5.88	162	122	160		-5.88	146	206	166	207	238	242		-5.88	152	121	150		-5.88	138	186
-5.88207	157	146	159	156	285	305	283	295	167	155	194	168			-6.54	126	117	140		-6.54	179	278	240	234	285	250	241		-6.54	128	113	136		-6.54	144	204	177	210	246	218		-6.54	139	102	159		-6.54	141	179
-6.54061	151	154	169	148	275	290	283	298	170	153	232	156			-7.19	108	112	134		-7.19	182	272	200	218	280	241	228		-7.19	120	99	131		-7.19	143	178	175	204	228	212		-7.19	123	99	151		-7.19	148	170
-7.19382	163	157	157	155	263	307	276	288	171	166	196	187			-7.86	102	110	101		-7.86	163	270		161	266	200	173		-7.86	93	105	90		-7.86	129		122	183	203	156		-7.86	96	98	119		-7.86	113	101
-7.86012	137	138	148	140	226	269	240	272	171	153	211	162			-8.52	78	110	94		-8.52				151	137	120	103		-8.52	87	108	108		-8.52			93	120	135	103		-8.52	90	97	104		-8.52	96	95
-8.52288	112	108	122	110	162	192	179	186	161	165	175	165			-9.14	105	139	122		-9.84	102	162	123	121	135	121	105		-9.14	106	111	100		-9.84	126	118	124	111	121	108		-9.14	107	102	115		-9.84	104	125
-9.14267	105	97	108	104	117	127	132	119	146	125	137	121			-9.84	102	119	99		-10.52	95	122	102	107	105	93	89		-9.84	105	102	98		-10.52	97	97	100	95	101	96		-9.84	104	94	116		-10.52	102	107
-9.82974	108	96	103	101	106	119	103	112	113	110	103	112			-10.52	95	126	104		-11.22	92	107	98	117	108	92	91		-10.52	104	98	98		-11.22	93	95	97	94	91	95		-10.52	103	102	115		-11.22	99	106
-10.5143	98	102	115	118	94	113	101	104	102	100	102	93			-11.22	102	114	119		-11.89	92	100	98	105	98	82	95		-11.22	99	109	101		-11.89	96	95	99	95	92	91		-11.22	122	113	116		-11.89	101	114
-11.1938	102	95	104	106	99	114	100	113	91	93	97	91			-11.89	112	114	114		Vehicle	100	100	100	100	100	100	100		-11.89	106	101	104		Vehicle	100	100	100	100	100	100		-11.89	110	101	98		Vehicle	100	100
-11.8539	106	108	106	110	98	115	102	116	96	108	91	81			Vehicle	100	100	100											Vehicle	100	100	100										Vehicle	100	100	100
Sphingosine 1-phosphate and S1PR1: GoB															Sphingosine 1-phosphate and S1PR1: G12												Sphingosine 1-phosphate and S1PR1: G13												SLIGKV-NH2 and PAR2: G12
Log [Sphingosine 1-phosphate], M	Endogenous				Log [Sphingosine 1-phosphate], M	+ S1P1									Log [Sphingosine 1-phosphate], M	Endogenous					Log [Sphingosine 1-phosphate], M	+ S1P1					Log [Sphingosine 1-phosphate], M	Endogenous					Log [Sphingosine 1-phosphate], M	+ S1P1					Log [SLIGKV-NH2], M	Endogenous				+ PAR2
-5.22	303	157	319		-5.22	99	134	181	123	163	196	187			Vehicle	100	100	100	100		Vehicle	100	100	100	100		Vehicle	100	100	100	100		Vehicle	100	100	100	100		-3.22	117	116	137	126	137	154	132	142	128	150
-5.88	193	126	216		-5.88	119	148	186	137	158	184	173			-5.22185	162	167	158	171		-5.22185	217	182	184	192		-5.22185	172	173	187	209		-5.22185	292	259	263	269		-3.69	123	124	139	137	133	148	118	126
-6.54	164	122	135		-6.54	126	144	178	147	158	173	175			-5.88207	155	151	166	174		-5.88207	204	177	183	186		-5.88207	162	173	163	181		-5.88207	244	254	253	259		-4.16	119	112			138	119	152	125	140	126
-7.19	125	104	128		-7.19	125	150	146	141	159	178	146			-6.54061	143	127	145	151		-6.54061	184	181	176	181		-6.54061	153	166	160	186		-6.54061	221	213	222	214		-4.62	124	104	135	157	139	110	143	130	124	121
-7.86	97	97	118		-7.86	111	169	112	123	150	156	149			-7.19382	132	132	128	140		-7.19382	150	142	138	153		-7.19382	147	143	154	161		-7.19382	160	162	139	171		-5.1	106	106	137	136	158	138	141	121	138	116
-8.52	102	100	92		-8.52	100	144	98	104	138	123	94			-7.86012	109	112	106	132		-7.86012	119	105	111	106		-7.86012	129	121	137	131		-7.86012	125	121	124	116		-5.55	115	91	101	113	176	124	145	142	171	147
-9.14	113	126	100		-9.84	96	103	112	102	104	101	94			-8.52288	101	100	116	116		-8.52288	116	113	103	102		-8.52288	110	107	106	120		-8.52288	108	107	98	109		-6.02	86	94	99	95	174	125	158	146	160	151
-9.84	125	122	94		-10.52	91	99	111	103	94	91	86			-9.14267	102	101	107	108		-9.16749	108	92	97	94		-9.14267	104	100	100	112		-9.16749	103	100	101	101		-6.49	79	89	97	92	165	134	159	153	148	134
-10.52	109	112	89		-11.22	95	104	106	103	86	94	84			-9.82974	108	97	97	104		-9.83565	109	95	99	100		-9.82974	93	94	105	120		-9.83565	106	105	91	112		-6.92	111	81	90	83	168	123	152	136	145	136
-11.22	124	125	103		-11.89	99	96	103	102	83	95	90			-10.5229	95	100	106	99		-10.5229	114	93	98	95		-10.5229	101	90	100	112		-10.5229	93	113	91	93		-7.4	94	92	86	89	152	126	125	116	135	115
-11.89	112	108	87		Vehicle	100	100	100	100	100	100	100			-11.2218	102	100	104	106		-11.2218	109	84	100	99		-11.2218	93	113	95	109		-11.2218	105	99	87	100		-7.89	93	101	99	94	117	113	126	97	119	101
Vehicle	100	100	100												-11.8861	101	102	103	117		-11.8861	107	98	102	100		-11.8861	92	101	96	108		-11.8861	101	118	100	99		Vehicle	100	100	100	100	100	100	100	100	100	100
SLIGKV-NH2 and PAR2: G13														SLIGKV-NH2 and PAR2: Gq												SLIGKV-NH2 and PAR2: G11												SLIGKV-NH2 and PAR2: G14											SLIGKV-NH2 and PAR2: G15
Log [SLIGKV-NH2], M	Endogenous				+ PAR2									Log [SLIGKV-NH2], M	Endogenous						Log [SLIGKV-NH2], M	+ PAR2				Log [SLIGKV-NH2], M	Endogenous					Log [SLIGKV-NH2], M	+ PAR2					Log [SLIGKV-NH2], M	Endogenous					Log [SLIGKV-NH2], M	+ PAR2				Log [SLIGKV-NH2], M
-3.22		173	179	161	328	267	395	329	296	289	324	310		-3.68787	133.476	111	125	130	110		-3.69	449	336	315		-3.68787	120	129	120	117		-3.69	565	501	701	595		-3.68787	108	132	138	106		-3.69	555	466	432		-3.68787
-3.69	182	202	219	230	341	268	399	357	288	249	335	301		-4.15273	146.018	123	130	142	129		-4.16	377	339	326		-4.15273	129	136	135	122		-4.16	443	502	633	578		-4.15273	116	137	150	122		-4.16	490	438	410		-4.15273
-4.16	157	220	257	224	315	272	447	359	302	324	389	331		-4.62083	145.446	118	127	142	132		-4.62	306	319	323		-4.62083	122	130	128	122		-4.62	421	481	656	581		-4.62083	119	134	148	111		-4.62	456	407	400		-4.62083
-4.62	147	199	222	212	324	299	428	379	303	300	379	366		-5.08866	131.95	109	117	127	113		-5.1	208	282	270		-5.08866	112	113	124	112		-5.1	390	436	585	616		-5.08866	108	118	130	107		-5.1	370	337	359		-5.08866
-5.1	125	167	163	142	409	277	440	371	329	329	394	368		-5.55296	116.738	97	103	117	106		-5.55	165	249	228		-5.55296	98	104	83	98		-5.55	314	302	506	539		-5.55296	95	103	120	91		-5.55	282	234	336		-5.55296
-5.55	112	125	121	121	356	319	427	383	323	352	419	366		-6.01777	107.01	92	95	118	94		-6.02	134	200	181		-6.01777	86	102	92	86		-6.02	249	291	367	419		-6.01777	83	96	109	90		-6.02	213	188	298		-6.01777
-6.02	96	114	105	105	352	298	384	372	309	339	348	302		-6.48947	100.095	87	88	105	88		-6.49	113	169	159		-6.48947	86	94	89	78		-6.49	199	201	279	235		-6.48947	82	95	100	90		-6.49	164	156	211		-6.48947
-6.49	86	109	98	95	286	213	335	302	254	258	294	290		-6.95079	99.3801	85	88	109	92		-6.92	107	137	131		-6.95079	81	90	74	76		-6.92	161	162	172	169		-6.95079	78	89	99	85		-6.92	135	129	148		-6.95079
-6.92	87	87	110	97	214	171	235	230	182	177	249	257		-7.39794	96.4711	82	92	89	82		-7.4	104	122	127		-7.39794	83	95	86	82		-7.4	130	125	131	129		-7.39794	79	89	102	78		-7.4	118	120	115		-7.39794
-7.4	88	97	98	103	147	143	163	172	138	143	167	154		-7.92082	103.433	85	91	100	93		-7.89	107	104	105		-7.92082	86	93	78	86		-7.89	114	114	109	115		-7.92082	83	93	107	80		-7.89	112	100	111		-7.92082
-7.89	97	109	109	103	116	108	129	124	118	129	131	142		Vehicle	100.095	100	100	100	100		Vehicle	100	100	100		Vehicle	100	100	100	100		Vehicle	100	100	100	100		Vehicle	100	100	100	100		Vehicle	100	100	100		Vehicle
Vehicle	100	100	100	100	100	100	100	100	100	100	100	100
SLIGKV-NH2 and PAR2: Gi1												SLIGKV-NH2 and PAR2: Gi2											SLIGKV-NH2 and PAR2: GoA												SLIGKV-NH2 and PAR2: GoB												SLIGKV-NH2 and PAR2: Gz
Log [SLIGKV-NH2], M	Endogenous					Log [SLIGKV-NH2], M	+ PAR2					Log [SLIGKV-NH2], M	Endogenous					Log [SLIGKV-NH2], M	+ PAR2				Log [SLIGKV-NH2], M	Endogenous					Log [SLIGKV-NH2], M	+ PAR2					Log [SLIGKV-NH2], M	Endogenous					Log [SLIGKV-NH2], M	+ PAR2					Log [SLIGKV-NH2], M	Endogenous
-3.68787	331	283	278	331		-3.69	782	654	538	596		-3.68787	313	294	307	354		-3.69	502	382	392		-3.68787	260	269	270	310		-3.69	378	262	277	290		-3.68787	312	343	330	393		-3.69	465	414	368	452		-3.68787	360	298
-4.15273	290	238	276	311		-4.16	770	605	518	537		-4.15273	277	281	309	316		-4.16	434	395	361		-4.15273	253	235	265	256		-4.16	349	286	327	302		-4.15273	334	340	365	389		-4.16	539	416	396	462		-4.15273	344	285
-4.62083	232	215	240	244		-4.62	623	482	436	544		-4.62083	214	234	263	281		-4.62	397	337	356		-4.62083	207	197	212	236		-4.62	344	243	303	319		-4.62083	300	273	314	356		-4.62	454	344	406	463		-4.62083	293	257
-5.08866	171	151	176	187		-5.1	535	414	398	476		-5.08866	160	164	175	188		-5.1	388	304	335		-5.08866	143	146	162	159		-5.1	260	243	292	276		-5.08866	213	221	225	254		-5.1	390	333	345	462		-5.08866	242	199
-5.55296	131	119	134	134		-5.55	393	353	324	374		-5.55296	124	124	143	145		-5.55	314	278	250		-5.55296	127	129	141	132		-5.55	229	229	219	252		-5.55296	152	143	149	180		-5.55	350	319	271	454		-5.55296	195	166
-6.01777	116	109	113	116		-6.02	207	279	248	260		-6.01777	104	118	125	131		-6.02	174	217	209		-6.01777	116	111	123	118		-6.02	178	194	180	223		-6.01777	129	127	122	132		-6.02	263	276	245	406		-6.01777	160	141
-6.48947	110	98	108	108		-6.49	139	213	170	196		-6.48947	102	108	111	121		-6.49	132	179	140		-6.48947	118	106	106	108		-6.49	136	157	142	170		-6.48947	111	112	117	121		-6.49	164	252	204	338		-6.48947	122	120
-6.95079	109	98	102	104		-6.92	114	168	118	152		-6.95079	101	108	109	119		-6.92	104	137	118		-6.95079	105	102	119	120		-6.92	109	108	123	126		-6.95079	102	117	108	114		-6.92	122	180	159	243		-6.95079	115	119
-7.39794	104	98	105	103		-7.4	108	126	100	127		-7.39794	98	107	113	111		-7.4	107	111	98		-7.39794	111	115	111	117		-7.4	101	99	107	115		-7.39794	110	113	112	110		-7.4	107	131	110	165		-7.39794	107	105
-7.92082	109	96	104	101		-7.89	94	113	96	109		-7.92082	100	104	104	105		-7.89	107	102	98		-7.92082	104	113	112	110		-7.89	109	98	107	104		-7.92082	108	109	106	112		-7.89	108	116	100	128		-7.92082	112	103
Vehicle	100	100	100	100		Vehicle	100	100	100	100		Vehicle	100	100	100	100		Vehicle	100	100	100		Vehicle	100	100	100	100		Vehicle	100	100	100	100		Vehicle	100	100	100	100		Vehicle	100	100	100	100		Vehicle	100	100
[truncated: 79 more columns]
