# Supplementary material for: Effector membrane translocation biosensors reveal G protein and βarrestin coupling profiles of 100 therapeutically relevant GPCRs
Source: eLife. 2022 Mar 18;11:e74101. doi: 10.7554/eLife.74101 (PMC9005190; doi:10.7554/eLife.74101)
Supplement: Figure 3—figure supplement 3—source data 1. [file elife-74101-fig3-figsupp3-data1.xlsx]

## Sheet: Figure 3- figure supplement 3
Source data for Figure 3- figure supplement 3
Figure supplement 3A; PKN-RBD-RlucII or MyrPB-Ezrin-RlucII/rGFP-CAAX
FP + PKN-RBD-RlucII								FP + MyrPB-Ezrin-RlucII										Cys-LT2R + PKN-RBD-RlucII								Cys-LT2R + MyrPB-Ezrin-RlucII
Log [PGD2], M	Control			YM-254890				Log [PGD2], M	Control					YM-254890				Log [LTD4], M	Control			YM-254890				Log [LTD4], M	Control					YM-254890
Vehicle	100	100	100	100	100	100		Vehicle	100	100	100	100	100	100	100			Vehicle	100	100	100	100	100	100		Vehicle	100	100	100	100	100	100	100
-5.22	151	136	138	148	148	153		-5.22	48	52	37	40	45	44	53			-6.4	127	127	153	122	130	144		-6.4	34	49	32	42	40	38	38
-5.88	144	142	152	145	166	149		-5.88	42	61	37	45	55	47	50			-6.86	129	126	154	118	125	137		-6.86	32	44	31	49	37	40	40
-6.54	158	143	147	156	161	155		-6.54	48	61	39	45	50	47	50			-7.33	128	122	135	126	120	129		-7.33	34	51	34	51	39	40	38
-7.19	144	142	150	153	161	153		-7.19	55	68	46	50	52	50	58			-7.79	129	125	135	116	120	123		-7.79	45	51	34	42	40	40	46
-7.86	158	152	156	171	166	139		-7.86	67	68	50	50	52	59	63			-8.27	119	111	132	110	101	120		-8.27	40	51	40	44	42	50	46
-8.52	160	138	142	164	151	151		-8.52	88	87	56	60	61	74	87			-8.73	120	113	130	110	107	106		-8.73	53	53	40	58	45	55	54
-9.14	132	120	130	139	134	120		-9.14	109	103	72	88	82	91	111			-9.19	112	107	118	106	104	104		-9.19	74	60	46	53	45	57	66
-9.84	133	114	122	124	123	116		-9.84	112	113	81	88	95	100	108			-9.67	105	104	118	108	105	107		-9.67	89	60	52	65	56	62	90
-10.52	119	109	127	114	121	114		-10.52	112	135	102	93	93	115	118			-10.1	107	100	113	103	107	106		-10.1	96	79	68	77	68	69	98
-11.22	123	111	115	118	113	117		-11.22	112	123	94	108	102	97	108			-10.57	99	103	107	100	102	106		-10.57	119	88	80	86	76	88	104
-11.89	120	103	110	110	109	102		-11.89	115	129	104	110	102	103	111			-11.06	100	100	108	100	100	101		-11.06	115	100	97	109	92	90	112
Figure supplement 3B; Calcium+ G15
EP2; Kinetics																	KOR; Kinetics													a2A-AR; Kinetics
Time (sec)	Control							200ng Gα15									Time (sec)	Control					200ng Gα15							Time (sec)	Control_DMSO						Control_YM-254890						200ng Gα15_DMSO						200ng Gα15_YM-254890
1.7496	2889.74	2644.61	3250.94	3972.75	4129.11	4133.05	4162.24	2641.24	2724.6	3149.54	3615.71	3936.82	4496.69	4254.36			0.723	3636.55	4245.91	2836.32	3709.2	4098.75	3776.93	4328.73	3137.99	3429.31	4863.37			0.7172	2801.44	3089.18	3850.48	3879.01	4005.46	3991.04	3065.3	3468.66	3788.22	3665.32	3845.26	4192.45	3111.13	2805.1	3422.27	3764.05	3659.3	4402.72	3300.66
3.132	2842.9	2901.11	3139.7	4046.72	4303.61	4234.48	4133.04	2627.63	2593.4	3227.36	3772.92	4120.44	4345.74	4403.62			2.054	3433.05	4220.16	2857.27	3698.34	4228.69	3727.73	4196.92	3057.17	3631.49	4745			2.0996	2885.27	3110.61	3918.69	3890.78	3890.07	3786.18	3174	3498.69	3731.98	3835.73	3971.44	4064.68	3063.79	2882.7	3591.48	4000.06	3944.81	4430.35	3190.64
4.668	2881.26	2874.59	3298.43	3853.54	4206.88	4090.93	4197.13	2690.01	2579.57	3145.41	3728.92	3928.06	4313.75	4347.57			3.48	3623.34	4289.77	3039.55	3673.6	4237.21	3624.87	4242.17	3265.26	3586.57	4603.46			3.5588	2807.47	3079.43	3796.29	3785.3	3994.86	3786.39	3186.5	3582.66	3695.64	3752.53	3956.93	3999.65	2945.82	2732.07	3542.14	3708.03	3935.58	4459.07	3171.11
6.0504	2917.92	2741.89	3099.95	3916.58	4205.9	4293.4	4138.21	2591.17	2634.89	3110.18	3687.33	3980.79	4377.37	4337.71			4.954	3411.62	4052.76	3031.96	3609.3	4245.05	3766.55	4113.74	3221.67	3438.53	4751.63			5.018	2749.75	3043.66	3609.27	3831.3	3896.9	4011.4	3220.53	3486.17	3742.1	3792.25	3838.49	4037.86	2999.91	2942.58	3611.89	3655.19	3887.62	4463.86	3129.27
7.5608	2872.5	2808.6	3198.32	3976.3	4371.77	4145.27	4046.46	2666.64	2798.62	3265.51	3635.63	3903.04	4293.1	4372.41			6.479	3412.45	4133.05	2911.54	3666.04	4186.75	3554.03	4255.49	3125.81	3705.68	4684.86			6.554	2991.3	3026.71	3972.66	3874.61	3922.31	3870.24	3019	3486.54	3764.77	3763.34	3921.66	4134.18	2992.78	2911.36	3518.23	3807.35	3910.43	4580.27	3097.52
9.0712	2974.31	2886.07	3219.26	3909.33	4249.52	4236.8	4159.78	2856.7	2795.37	3170.36	3641.68	3974.78	4382.05	4397.62			7.993	3866.49	4261.11	2834.74	3700.65	4191.88	3776.92	3974.45	3120.06	3472.06	4654.51			8.1412	2916.21	3043.48	3830.93	3902.48	3769.89	3928.47	3166.36	3547.97	3751.52	3887.32	3850	4034.11	3128.74	3065.38	3496.83	3726.49	3946.05	4522.39	3228.51
10.5816	2855.34	2906.08	3163.08	3973.26	4310.6	4074.21	4041.48	2481.89	2564	3042.07	3703.45	4099.13	4269.32	4204.6			9.503	3555.77	4200.79	2941.82	3813.34	4197.54	3638.34	4191.92	3216.13	3540.36	4666.72			9.5748	2710	3018.9	3839.75	3980.02	3891.57	3829.24	3088	3546.62	3783.62	3878.05	3827.19	4134.86	3072.44	2951.31	3492.17	3732.93	3962.62	4396.89	3292.43
12.1432	2748.95	2792.77	3124.91	3811.34	4194.54	4144.02	4179.89	2596.63	2831.1	3119.81	3819.34	3982.54	4231.36	4272.84			11.006	3576.89	4305.62	2751.61	3685	4154.14	3894.78	4228.52	3180.93	3385.63	4776.63			11.1108	2856.52	2929.29	3733.61	3839.91	3827.01	3779.84	2965.47	3584.9	3695.25	3988.56	3853.66	4011.83	2953.11	2945.29	3422.16	3627.35	4057.71	4438.79	3264.75
13.6792	2753.19	3031.77	3217.26	3848.47	4397.22	4287.79	4016.13	2746.15	2732.52	3122.03	3802.85	4199.26	4384.44	4277.77			12.535	3599.48	4093.74	3005.27	3707.69	4443.02	3784.63	4154.31	3257.61	3714.44	4880.01			12.6212	2844.19	3174.4	3905.98	3871.91	3895.43	3973.16	3154.62	3354.11	3655.35	3895.92	3855.8	3977.14	2990.21	2935.49	3771.21	3805.26	4098.8	4489.31	3296.27
15.1896	2842.52	2739.45	3358.32	3925.12	4203.03	4242.9	4202.59	2625.07	2556.49	3308.28	3601.74	3999.95	4505.7	4226.93			14.078	3552.96	4176.42	2947.94	3812.69	4123.91	3740.26	4248.64	3118.48	3437.34	4705.85			14.1316	2794.21	3110.3	3825.85	3801.38	3940.04	3941.86	3131.19	3546.84	3800.45	3922.53	3943.31	4100.97	2983.15	2980.66	3477.17	3865.53	3832.98	4654.96	3179.88
16.7256	2772.43	2820.97	3179.82	3944.92	4286.07	4133.87	4306.3	2538.63	2742.8	3211.68	3769.98	4050.87	4429.6	4325.7			15.614	3429.72	4234.86	2908.16	3617.58	4156.73	3864.35	4017.54	3129	3448.17	4645.88			15.77	2796.82	3240.3	3703.59	3753.89	3883.49	3769.45	3018.3	3556.73	3818.72	3899.13	3772.52	4093.47	2969.46	2975.3	3461.83	3696.11	4028.12	4361.3	3089.92
18.236	2896.24	2751	3052.08	3840.75	4279.46	4247.06	4031.28	2572.36	2555.32	3095.11	3701.61	3932.27	4367.79	4316.13			17.136	3490.62	4287.87	3018.08	3660.53	4234.87	3721.18	4124.2	3362.93	3557.37	4827.58			17.2804	2859.78	3187.63	3728.66	3966.61	3823.23	3921.08	3048.42	3597.3	3688.73	4025.2	3739.45	3921.38	2995.69	3045.63	3508.82	3796.1	4042.45	4435.09	3276.98
19.772	3104.6	2837.59	3315.97	4037.66	4118.98	4017.45	4261.6	2531.55	2757.83	3028.69	3723.43	3939.41	4315.23	4355.13			18.654	3604.35	4349.73	2797.1	3523.04	4289.82	3811.38	4156.28	3185.59	3459.91	4623.91			18.8932	2805.06	3091.89	4044.4	3934.04	3967.15	3845.33	3183.23	3395.87	3601.23	3875.94	3654.95	4269.89	3087.88	3080.26	3695.2	3649.23	3973.37	4432.58	3200.27
21.2312	2899.3	2818.91	3094.08	4001.95	4265.04	4403.14	4128.15	2621.88	2697.96	3150.6	3748.93	4056.51	4365.54	4208.53			20.179	3683.39	4132.15	2980.22	3671.74	4215.36	3632.53	4237.5	3364.79	3605.81	4627.2			20.3268	2816.79	3100.99	3813.55	3832.52	3781.1	3849.8	3169.03	3564.7	3799.28	3901.84	3897.82	4292.6	3112.25	2984.03	3564	3807.36	4036	4660.92	3262.55
22.7672	2750.23	2730.94	3296.38	3898.7	4193.93	4204.56	4072.21	2643.32	2503.16	3169.8	3584.32	3990.72	4270.38	4318.77			21.689	3313.54	4450.62	2761.52	3690.35	4281.87	3846.28	4405.69	2759.7	3474.88	4768.51			21.8628	2844.71	3122.27	3827.24	3851.51	3879.42	3930.86	2940.03	3455.85	3781.37	3948.45	3849.26	4305.66	3020.9	2988.68	3589.65	3751.26	4049.32	4531.18	3185.62
24.3288	2742.99	2693.38	3155.49	3916.84	4424.85	3991.9	4121.79	2634.82	2737.53	2929.54	3599.03	4133.01	4328.79	4202.93			23.225	3590.7	4468.47	2695.66	4146.5	4664.43	3938.81	4301.33	2930.73	3669.89	5190.73			23.3732	2767.4	2978.21	3565.95	3823.56	3960.51	3768.32	2879.66	3393.11	3605.85	3850.13	3747.66	4108.5	2820.01	2759.03	3206.72	3511.97	3860.79	4233.65	3234.02
25.9416	2954.72	2906.06	3176.52	3990.4	4389.35	4228	4048.23	2891.63	2966.78	3375.37	3738.14	3968.43	4511.02	4321.39			24.776	3600.76	4595.71	2872.96	4039.95	4766.97	3836.16	4672.48	3263.56	3676.86	5304.27			24.8836	2832.08	3022.49	3500.88	3669.09	3665.8	3765.2	3009.83	3572.64	3524.68	3734.46	3796.1	4126.64	2921.21	2764.67	3637.08	3598.09	3853.08	4126.53	3203.88
27.324	2966.6	3010.59	3427.38	4008.66	4460.11	4360.6	4217	3156.07	2860.16	3492.09	3789.13	4111.84	4557.21	4325.59			26.297	3927.67	4882.69	3053.86	4227.43	4803.73	4200.39	4932.75	3467	3715.59	5350.44			26.4452	2884.19	2975.64	3915.02	3942.64	3942.31	3946.45	3255.04	3458.16	3685.53	3805.89	3854.17	4170.18	3316.09	3520.02	4880	4045.6	4160.04	4668.43	3466.59
28.9112	3151.55	3073.49	3476.29	4067.75	4619.46	4489.6	4354.81	3208.99	3240.72	3365.57	3911.19	4433.81	5015.67	4689.6			27.829	4167.03	5276.53	3184.57	4315.22	4928.19	4474.29	5090	3516.77	3936.91	5379.19			27.93	3381.03	3806.62	4908.3	4203.52	4125.82	3946.49	3305.94	3686.03	3914.22	3968.28	4085.43	4310.76	4090.21	4027.75	5722.22	5389.09	4620.42	5132.19	3519.81
30.4472	3287.7	3196.29	3429.92	4335.65	4595.02	4632.03	4331.38	3604.31	3129.08	3678.37	4203.74	4455.74	5299.74	5139.62			29.351	4266.77	5133.75	3420.72	4286.26	4887.61	4694.26	5292.41	4022.53	4002.1	5685.17			29.4404	3831.96	4110.04	5545.36	5081.65	4449.01	4295.56	3476.43	3701.5	4037.89	3922.41	4039.57	4228.32	4415.25	4459.33	6611.16	6214.86	4982.74	5642.85	3723.36
31.9064	3308.72	3059.44	3573.01	4309.03	4821.31	4621.91	4501.48	3606.28	3563.13	3829.76	4307.75	4641.97	5589.22	5361.6			30.872	4648.77	5455.4	3639.12	4601.64	5106.64	5334.95	5772.09	4383.95	4031.73	5963.99			30.9764	4105.31	4671.23	6436	5920.4	4893.43	4861.53	3508.26	3900.27	4137.84	4184.52	4121.37	4282.64	5169.56	4887.17	7153.73	6937.23	5420.22	6112.8	3846.68
33.468	3556.61	3239.06	3539.69	4575.05	4930.51	4696.79	4789.35	3862.09	3624.37	3725.42	4423.48	4703.44	5897.08	5587.18			32.397	4515.12	5612.69	3737.95	4541.28	5281.54	5225.59	5912.63	4521.21	4232.36	5849.73			32.4868	4693.13	5075.95	6953.62	6636.87	5359.78	5171.53	3853.72	3864.59	4429.02	4193.2	4248.65	4487.65	5247.21	5306.23	7688.27	7608.25	5724.89	6351.34	3970.35
35.004	3554.53	3427.84	3856.35	4419.69	4866.73	4965.34	4848.22	3835.2	3681.74	4123.11	4500.98	4862.72	6190.06	5935.34			33.944	4592.65	5507.86	3757.04	4799.53	5184.27	5625.82	6147.18	4736.63	4345.04	6270.24			34.0996	4978.86	5400.91	7202.88	7170.39	5760	5389.97	3779.6	3888.94	4245.14	4225.15	4129.31	4432.38	5533.01	5828.6	7889.39	7802.53	6050.34	6690.84	4132.4
36.54	3484.78	3446.32	3728.8	4402.07	4970.06	4928.15	4968.68	3989.96	3863.85	4006.27	4466.23	4968.48	6291.03	6090.29			35.487	4704.02	5678.01	3924.37	4706.91	5332.31	5693.89	6235.88	4814.63	4508.39	6092.96			35.61	5031.25	5619.4	7817.6	7662.04	6087.14	5825.05	3721.55	3939.33	4343.94	4247.18	4185.46	4394.99	5691.39	5708.12	8477.88	8212.99	6234.39	7054.57	3963.64
38.0504	3682.63	3377.17	3753.05	4622.07	4958.91	4918.07	4885.33	3975.36	3665.31	4252.65	4550.33	4993.68	6190.93	6310.68			36.994	4838.82	5535.04	3954.84	4755.97	5466.41	5815.53	6300.26	4999.19	4486.17	6373.88			37.2228	5151.38	5774.01	7690.44	7965.21	6261.14	5830.4	3678.67	3950.74	4401.32	4140.86	4184.2	4457.14	5810.4	6141.16	8302.8	8653.63	6485.18	7286.56	3942.64
39.612	3690.99	3341.01	3707.25	4550.21	4947.16	5163.02	5186.38	3950.87	3898.14	3953.34	4679.91	5183.92	6477.88	6365.39			38.505	4880.23	5662.08	3923.82	4751.4	5252.6	5943.38	6385.91	5086.22	4513.31	6589.49			38.6564	5181.78	5722.77	8003.57	7868.04	6355.28	6075.16	3892.59	3986.1	4317.86	4245.82	4059.71	4546.86	6008.96	6033.33	8600.59	8593.1	6494.47	7315.51	4069.61
41.1224	3577.32	3352.81	3602.25	4551.6	4906.87	4917.75	4946.47	4000.83	3944.34	4223.98	4875.68	5392.39	6390.66	6482.67			40.026	4668.75	5731.9	4009.08	4538.81	5525.8	5902.7	6518.38	5168.33	4535.36	6598.49			40.1668	5203.73	5889.13	7845.12	8069.74	6557.77	6132.52	3768.51	3782.44	4386.24	4159.14	4166.6	4528.36	6099.73	6139.15	8472.35	8696.86	6783.99	7590.09	4078.72
42.5816	3536.87	3389.7	3605.24	4500.64	4817.03	5114.77	4996.48	3956.86	3905.48	4188.86	4730.48	5278.15	6590.7	6581.15			41.54	4948.12	5533.03	4011.01	4695.32	5321.97	6134.98	6661.12	4942.58	4660.19	6640.3			41.7028	5126.54	5943.18	7833.81	8176.53	6690.31	6177.37	3898.62	3864.91	4272.09	4098.96	4128.82	4486.4	6212.24	6143.68	8550.55	8570.56	6986.48	7572.87	4107.6
44.1944	3469.73	3405.53	3767.59	4553.12	5040.12	5080.6	5023.08	3888.62	3967.93	4199.2	4692.16	5392.71	6621.85	6389.03			43.08	4689.05	5600.54	3950.26	4634.01	5453.03	6119.88	6453.05	5139.39	4744.74	6618.97			43.2132	5090.96	5858.39	8026.76	8217.88	6539.36	6270.26	3848.78	4026.43	4356.4	4330.01	4023.61	4394.67	6142.52	5966.8	8721.39	8531.83	6945.61	7906.59	4052.76
45.7304	3521.01	3204.14	3638.54	4528.86	4808.48	5000.1	5000.18	4097.52	3829.52	4049.93	4734.01	5259.92	6679.23	6413.95			44.608	4885.65	5480.99	3930.32	4656.19	5257.03	5872.89	6459.43	5123.44	4699.97	6550.72			44.826	5034.83	5742.92	7922.49	8121.39	6808.41	6470.39	3696.39	3760.29	4439.09	4201.72	4302.66	4420.65	5967.85	5940.44	8831.25	8532.33	7010.46	7681.83	4051.26
47.292	3416.54	3358.99	3697.71	4522.35	4849.83	5046.16	4970.37	4059.94	3870.71	4179.93	5036.68	5227.6	6416.75	6450.74			46.13	4787.33	5460.51	3816.98	4667.79	5321.19	5994.04	6458.63	5136.94	4673.48	6677.06			46.3364	5276.26	6034.45	7862.43	8040.06	6677.33	6555.72	3728.62	3686.08	4183.7	4166.45	4026.75	4428.57	6061.15	5945.7	8594.67	8532.27	6943.33	7619.49	4144.76
48.7768	3417.37	3271.62	3617.72	4534.82	4803.19	5077.03	5012.02	3855.82	3844.39	4293.87	4811.68	5356.9	6522.56	6498.42			47.651	4725.91	5427.13	3854.14	4646.04	5185.93	6072.37	6327.14	5014.97	4872.72	6701.05			47.9492	5243.06	5704.56	7829.26	8121.02	6834.45	6458.6	3833.57	3978.93	3999.01	4183.96	4032.69	4492.56	6126.58	5754.82	8605.94	8336.98	7151.14	7826.15	4148.36
50.236	3556.44	3342.47	3652.24	4474.91	4759.28	4863.41	4847.71	3967.8	3889.91	4270.47	4782.62	5435.82	6504.65	6675.25			49.172	4711.53	5365.46	3893.86	4652.16	5211.11	5885.63	6495.26	5030.42	4717.63	6534.37			49.4084	4995.25	5914.7	7955.88	7982.1	6948.75	6449.8	3643.76	3961.59	4337.02	4081.89	4110.15	4402.92	6167.16	5813.65	8421.47	8599.35	7161.7	8141.36	4085.43
51.772	3332.03	3116.4	3686.61	4588.78	4873.44	4917.83	5057.24	3938.78	3679.61	4028.16	5054.89	5445.6	6403.6	6670.08			50.686	4577.95	5404.33	3817.58	4470.69	5245.11	5874.97	6406.58	4928.2	4672.28	6639.36			50.9188	5011.27	5849.72	7797.02	7930.82	6780.32	6497.24	3567.46	3869.48	4106.82	4115.02	4125.5	4377.1	6040.81	5630.74	8502.9	8525.05	7036.43	7854.59	3983.73
53.3336	3173.39	3050.8	3480.79	4514.36	4764.01	4747.88	4867.81	3872.06	3852.68	4009.22	4873.85	5213.93	6231.19	6401.72			52.208	4463.66	5314.3	3758.7	4618.62	5187.37	5696.09	6160.16	4577.86	4749.41	6556.96			52.4292	4875.8	5738.29	7905.94	7769.6	6890.59	6494.9	3650.16	3884.66	4176.13	4183.7	4241.54	4319.1	5999.92	5619.97	8272.92	8608.74	7043.66	8079.35	3938.01
54.9208	3374.22	3208.91	3721.42	4520.2	4710.9	4898.83	4938.3	3999.19	3979.91	4218.1	4915.31	5237.55	6321.22	6362.28			53.766	4533.83	5185.49	3685.77	4607.23	5100.23	5940.33	6237.75	4724.23	4636.67	6392.56			53.9652	4927.41	5768.44	7720.18	7553.48	7065.43	6608.75	3677.17	3722.91	4002.66	3982.26	4143.81	4363.74	6136.04	5614.13	8575.62	8660.8	7221.02	8191.81	3910.3
56.3544	3277.22	3122.94	3403.72	4522.69	4621.86	4751.25	4825.76	3853.18	3745.51	3995.4	4993.08	5509.57	6245.93	6626.22			55.309	4640.32	5150.65	3847.2	4536.51	5081.48	5641.98	6043.44	4571.39	4580.24	6503.23			55.578	4996.25	5748.97	7740.69	7589.47	6865.73	6523.6	3605.64	3863.86	4003.99	3978.18	3981.47	4349.6	6034.32	5501.21	8228.19	8365.06	7183.9	8065.89	3954.2
57.916	3384.46	3217.61	3613.52	4351.28	4689.07	4756.82	4707.54	3887.47	3890.88	4277.57	4875.93	5449.09	6409.23	6329.2			56.838	4375.47	5083.64	3477.96	4344.97	5000.94	5387.26	5792.6	4498.55	4473.17	6241.25			57.114	4820.76	5637.7	7651.38	7770.47	7000.98	6477.94	3454.69	3833.32	4219.24	4064.94	4080.71	4391.09	6015.26	5645.41	8382.36	8445.42	7383.76	8152.04	4010.69
59.4264	3271.98	3138.66	3538.42	4313.61	4719.82	4825.58	4803.77	3827.35	3765.7	4061.28	5017	5459.87	6463.49	6398.6			58.355	4349.35	5026.32	3484.95	4399.76	4961.58	5406.02	5869.79	4603.66	4616.13	6269.1			58.7012	4845.19	5680.81	7542.55	7509.9	6826.35	6673.81	3622.01	3643.02	3901.69	4087.81	4133.44	4307.41	5988.15	5463.83	8377.99	8401.21	7272.49	8320.99	3744.24
60.9624	3227.45	3028.28	3590.07	4220.24	4764.73	4650.48	4766.44	3843.58	3914.67	4071.24	5048.73	5366.07	6115.36	6446.39			59.859	4311.25	4955.38	3570.7	4362.88	4945.86	5313.04	5708.4	4551.78	4443.1	6368.36			60.1604	4765.85	5634.97	7837	7411.1	6984.06	6622.98	3500.65	3558.79	3788.69	4130.01	4051.16	4250.84	6006.48	5396.19	8289.65	8180.07	7451.19	8285.24	3897.32
62.4216	3143.68	2972.49	3552.16	4267.9	4653.38	4741.25	4747.4	3623.89	3784.49	3955.48	4928.87	5281.23	6293.78	6280.8			61.395	4124.73	4915.51	3478.66	4282.96	4786.24	5387.13	5790.43	4059.61	4469.21	6211.07			61.6708	4741.12	5457.23	7494.98	7498.08	6791.22	6467.68	3564.41	3523.81	3923.57	3873.54	4048.21	4222.53	5864.17	5372.87	8005.2	8343.11	7495.12	8128.86	3863.39
64.0088	3272.09	3022.13	3651.86	4244.92	4537.76	4598.44	4708.3	3674.79	3872.79	4055.84	4956.97	5554.94	5996.81	6083.29			62.927	4013.34	4771.51	3342.79	4301.48	4744.46	5263	5574.72	4340.08	4371.57	6278.83			63.1812	4800.57	5601.09	7296.38	7387.44	6904.29	6825.43	3371.93	3621.71	3815.52	3939.79	3923.68	4226.51	6025.57	5380.89	7992.6	8312.5	7503.84	7981.69	3827.92
65.4936	3180.59	2994.02	3515.7	4254.15	4638.68	4405.19	4580.5	3716.09	3756.07	4168.56	4990.12	5568.09	5964.76	6223.41			64.47	4051.64	4684.4	3423.81	4160.57	4730.86	5141.33	5502.2	4206.45	4317.09	6024.25			64.7172	4703.53	5737.09	7355.51	7327.28	6872.43	6602.83	3476.13	3685.8	3905.92	3930.46	4035.72	4135.17	5890.15	5365.9	8178.48	8238.38	7344.54	8148.76	3718.55
67.004	3170.7	3087.66	3619.49	4225.32	4655.66	4762.34	4614.73	3749.36	3657.49	4080.04	5089.75	5426.6	5869.45	6160.47			65.984	3960.11	4599.88	3189.52	4301.21	4774.4	4968.58	5431.08	4069.59	4504.36	5915.83			66.3044	4650.39	5517.61	7272.83	7257.74	6753.15	6650.34	3520.46	3700.43	3906.74	3994.56	4133.06	4094.98	5732.98	5273.49	8060.06	8232.52	7475.56	8306.65	3790.33
68.54	3230.88	2933.34	3499.99	4265.07	4529.84	4567.7	4547.47	3793.05	3745.49	3911.89	5167.5	5337.15	5920.28	5944.45			67.502	3947.12	4443.61	3315.73	4154.45	4647.47	4926.54	5231.15	4187.32	4342.64	5884.37			67.738	4640.7	5317.31	7347.5	7258.55	6985.72	6660.94	3437.31	3656.82	3805.34	4058.04	3976.37	4286.45	5835.35	5155.83	7974.83	8146.05	7346.03	8343.53	3712.03
70.1016	3228.97	2924.61	3491.97	4310.93	4707.16	4446.22	4503.73	3592.04	3730.93	4031.79	4971	5352.86	5915.33	5958.28			69.053	3891.86	4415.11	3113.12	4203.34	4626.72	4933.1	5475.64	3987.35	4378.99	6012.86			69.274	4472.28	5422.53	7139	7280.14	6683.39	6515	3402.57	3668.33	3813.83	4032.57	4059.35	4297.47	5809.08	5056.1	7942.98	8017.36	7461.59	8243.8	3807.59
71.5608	3057.82	3019.64	3368.9	4084.41	4677.43	4475.56	4486.55	3610.75	3676.89	3946.32	5005.12	5436.31	5903.53	5797.2			70.556	3931.63	4564.47	3081.14	4102.09	4392.1	4812.77	4974.18	4010.87	4342.42	5829.44			70.7844	4452.52	5403.54	7090.42	6908.03	6678.29	6525.79	3296.58	3620.01	3898.58	3993.69	3802.62	4271.3	5922.57	4991.25	7637.31	7836.89	7392.4	8147.9	3732.4
73.1736	3133.23	2949.09	3487.72	4269.22	4515.07	4372.01	4502.93	3555.2	3613.07	3937.2	5070.13	5316.64	5651.2	5964.25			72.106	3768.69	4326.44	3099.89	4085.36	4528.39	4650.74	5110.03	3880.25	4324.19	5784.07			72.2948	4596.41	5544.61	6984.32	6959.23	6821.41	6503.7	3400.5	3678.27	3801.37	3874.98	3930.47	4198.7	5615.38	5060.51	7909.93	7783.63	7282.1	8042.07	3786.07
74.7096	3128.77	2953.45	3349.12	4267.73	4516.88	4389.27	4410.41	3706.62	3500.41	3932.79	5123.29	5276.71	5578.42	5878.39			73.617	3771.78	4459.81	2898.56	4174.05	4478.5	4533.6	5005.59	3946.22	4356.69	5690.38			73.8308	4499.6	5332.12	7066.73	7101.33	6771.85	6445.47	3233.8	3534.44	3782.59	3806.52	3839.66	4233.35	5715.84	4934.53	7685.21	7970.44	7327.98	7909.19	3632.25
76.2456	3035.23	3038.23	3419.8	4192.04	4504.7	4454.42	4288.94	3617.92	3479.06	3985.98	5073.42	5313.6	5761.7	5779.87			75.167	3765.07	4355.03	3057.09	4066.2	4613.1	4452.94	5030.1	3772.33	4387.65	5719.37			75.3412	4611.3	5130.47	7003.01	6853.09	6758.24	6689.97	3291.73	3460.63	3806.83	3702.49	3897.44	4223.99	5678.53	4971.9	7671.75	7772.97	7250.7	8034.14	3741.79
77.7816	3020.98	2875.15	3470.62	4242.24	4432.18	4366.42	4554.75	3570.96	3635.4	3882.62	5108.07	5302.13	5398.42	5789.46			76.696	3722.63	4273.84	3096.35	3919.54	4298.28	4548.67	4773.17	3617.39	4316.63	5582.78			76.9284	4339.87	5170.35	6789.71	6796.19	6723.06	6571.15	3449.49	3518.09	3785.91	3738.65	3925.4	4184.38	5436.96	4961.22	7524.47	7789.51	7586.99	8048.66	3714.1
79.3176	3075.95	2794.74	3459.74	4067.08	4652.19	4403.34	4325.67	3606.32	3451.39	3869.53	5050.62	5474.94	5588.87	5752.01			78.195	3740.46	4196.51	3024.66	3978.57	4493.64	4622.67	4783.79	3733.75	4007.82	5581.72			78.3876	4501.67	5133.17	6795.47	6607.99	6861.02	6385.3	3377.72	3414.74	3826.26	3794.06	4090.62	4098	5515.77	5068.08	7388.86	7729.38	7417.83	7915.5	3591.2
80.7512	3046.47	2924.63	3491.05	4092.71	4571.98	4397.34	4160.32	3540.61	3448.65	3834.2	4895.87	5320.96	5439.68	5844.35			79.731	3643.93	4184.96	3104.32	3930.52	4362.71	4369.41	4745.15	3691.97	4203.21	5578.05			79.898	4421.69	5053.45	6606.84	6462.59	6602.46	6486.09	3301.36	3562.67	3793.73	3861.43	3867.55	4183.43	5433.78	4900.62	7281.46	7603.64	7358.46	8373.89	3840.44
82.3128	3072.64	2771.5	3421.84	4055.63	4358.32	4261.45	4485.34	3484.9	3477.65	3721.25	4969.83	5246.78	5555.76	5680.01			81.253	3512.11	4103.42	2890.61	3931.67	4359.68	4531.01	4529.96	3622.44	4149.68	5570.45			81.434	4335.75	5049.02	6640.07	6638.89	6698.28	6495.83	3283.63	3529.05	3945.95	3841.51	3725.55	4156.64	5355.93	4864.24	7180.44	7655.32	7275.57	8124.02	3700.33
83.9256	3126.88	2849.48	3384.34	4245.68	4194.44	4277.17	4199.25	3468.26	3344.82	3830.83	4918.09	5319.43	5455.96	5623.65			82.822	3771.04	4052.46	2975.02	3853.81	4329.9	4281.32	4615.42	3691.27	4143.25	5280.86			82.9444	4452.86	4995.92	6446.34	6686.61	6471.89	6245.87	3277.62	3517.91	3645.26	3828.99	4013.41	4077.18	5399.06	4679.41	7208.02	7458.71	7361.89	7881.11	3665.93
85.4616	3109.1	3005.46	3215.55	4033.89	4462.44	4414.71	4183.28	3311.62	3474.97	3575.4	5109.85	5374.83	5201.11	5571.04			84.31	3674.55	4152.3	2986.18	3996.45	4188.93	4220.68	4570.35	3472.91	4145.1	5382.39			84.5572	4418.94	5063.41	6202.61	6422.86	6759.64	6631.34	3300.97	3410.92	3716.67	3842.21	3896.74	4084.08	5289.31	4871.89	7062.19	7297.66	7329.05	7905.27	3708.26
86.9976	3007.18	2830.33	3384.11	4030.2	4327.7	4078.64	4047.87	3176.57	3304.1	3802.59	4954.05	5373.82	5384.68	5490.04			85.846	3590.45	4173.38	3013.24	3896.38	4336.59	4192.25	4384	3595.16	4150.88	5349.54			86.0676	4128.89	4891.49	6358.13	6198.82	6613.27	6472.59	3265.12	3500.91	3828.43	3877.34	4018.1	4018.87	5093.53	4757.41	7255.88	7338.67	7209.58	7841.66	3676.33
88.508	3037.47	2961.22	3516.99	4110.68	4358.95	4349.82	4349.1	3329.68	3372.29	3716.16	4677.01	5101.58	5112.68	5529.23			87.379	3583.6	4069.54	2964.49	3723.47	4292.97	4124.9	4518.63	3589.81	4074.67	5397.4			87.6804	4099.84	4798.01	6129.59	6389.36	6405.52	6293.93	3151.51	3649.27	3774.34	3788.31	4041.05	4184.45	5133.99	4575.35	6912.26	7430.57	7232.37	7960.24	3427.61
90.0952	3070.62	3014.88	3373.95	4060.3	4398.17	4211.58	4241.36	3277.83	3347.18	3733.53	4864.14	5140.31	5158.48	5397.47			88.867	3409.71	4026.25	2839.12	3907.51	4180.48	3976.76	4337.71	3549.74	4005.48	5298.84			89.114	4178.8	4798.26	6230.14	6063.05	6618.05	6430.2	3225.97	3482.25	3800.69	3860.34	3878.72	3970.99	5209.07	4564.42	6835.3	7334.22	7022.36	7787.14	3583.96
91.58	2960.21	2765.64	3398.92	4241.04	4474.44	4142.03	4266.23	3273.76	3266.47	3778.65	4986.12	5045.9	5266.35	5411.2			90.392	3636.64	3971.28	2920.32	3839.55	4170.2	4014.37	4403.02	3546.6	4069.27	5091.2			90.65	3966.18	4809.14	6327.06	6121.02	6393.29	6265.99	3381.73	3563.39	3528.71	3745.59	3800.59	4268.04	5024.69	4693.15	6753	7228.1	7322.86	7957.83	3680.47
93.0392	2991.27	2851.39	3382.76	4009.04	4216.2	4255.79	4196.53	3174.98	3221.61	3566.72	4699.13	5106.34	5181.04	5249.7			91.928	3536.71	4024.57	2996.82	3924.97	4039.79	3993.05	4277.95	3430.63	3981.67	5206.02			92.1604	4214.55	4741.73	5951.05	6106.25	6234.24	6232.34	3122.73	3433.15	3697	3786.81	3713.39	4058.11	4899.76	4607.47	6904.75	7077.92	7163.34	7882.1	3688.92
94.652	3005.99	2865.03	3413.43	3989.44	4307.7	4254.12	4166.68	3087.31	3348.75	3772.91	4949.44	4990.82	4981.89	5180.22			93.471	3360.8	3966.06	2782.65	3693.06	4385.8	4016.19	4456.97	3380.89	4074.16	5068.71			93.6964	3860.07	4701.19	6023.16	6191.97	6288.24	6379.88	3286.29	3545.52	3612.58	3920.58	3799.61	4060.79	4939.48	4577.83	6825.61	7141.3	7136.56	7664.51	3485.5
96.188	2950.91	2959.85	3291.24	4164.71	4364.74	4210.62	4047.07	3151.23	3290.39	3712.92	4831.63	5197.74	5082.52	5285.65			94.982	3612.28	4036.35	2869.51	3705.22	4115.98	4040.41	4112.73	3421.3	3998.82	4842.83			95.2836	3892.75	4622.6	5734.5	5998.46	6316.69	6247.97	3203.49	3538.66	3707.81	3699.95	3794.67	4038.27	4833.03	4448.39	6550.57	7167.85	6852.43	7675.75	3481.99
97.724	2978.97	2950.2	3497.5	4009.17	4325.65	4295.08	4365.07	3197.74	3190	3602.26	4689.54	4976.48	4891.94	5132.1			96.507	3359.48	3733.79	2899.22	3837.86	4098.03	3812.71	4258.86	3254.19	4043.01	5023.92			96.794	3956.4	4722.14	5838.17	5806.01	6162.43	6310.34	3303.72	3431.92	3625.03	3866.07	3802.38	4181.63	4913.49	4549.98	6522.21	6954.64	6827.32	7778.29	3446.07
99.0296	2848.75	2778.89	3107.18	4095.45	4398.82	4034.55	4123.71	2953.09	3167.88	3596.45	4730.75	4940.63	4910.99	5195.2			98.025	3508.85	3901.09	2818.63	3659.84	4057.05	3858.11	4206.62	3434.31	3870.36	5033.45			98.4068	3863.7	4567.46	5848.3	5917.68	6292.15	6045.04	3206.94	3413.28	3558.06	3729.59	3687.54	4137.22	4845.69	4390.31	6588.22	6975.32	6991.15	7742.36	3584.63
100.796	2967.88	2994.87	3132.22	3825.88	4435.43	4226.83	4089.3	3051.33	3296.55	3620.33	4753.91	4942.72	5176.72	5221.23			99.531	3451.93	3810.03	2903.38	3845.95	3979.4	3701.81	4116.69	3262.02	3778.98	4843.5			99.866	3890.53	4659.91	5691.26	5815.07	6088.41	6197.06	3191.63	3332.8	3754.08	3786.46	3687.7	3958.14	4715.32	4519.51	6585.29	7026.48	6815.23	7483.77	3545.85
102.255	2929.14	2809.16	3346.16	4079.47	4434.71	4186.79	4173.91	2969.05	3098.14	3641.86	4829.27	4901.9	4898.11	5065.59			101.086	3475.71	3884.48	2924.24	3860.01	4136.68	3885.64	4239.24	3337.65	3827.18	4854.68			101.376	3832.3	4324.8	5650.8	5683.29	6067.97	5928.54	3165.04	3532.88	3745.29	3666	3803.99	3976.54	4852.78	4437.36	6525.81	6991.47	6815.78	7550.74	3659.24
103.791	2803.17	2892.59	3426.43	4081.77	4174.71	4115.26	4180.99	3124.01	3149.33	3564.69	4759.76	5011.51	4983.72	5089.54			102.629	3486.74	4167.94	2841.66	3799.6	3991.33	3914.07	3981.11	3278.92	3734.38	4886.61			102.887	3737.79	4582.63	5691.13	5612.66	6238.85	5835.33	3141.33	3596.64	3630.47	3798.06	3777.07	4194.85	4442.94	4381.85	6312.97	6996.77	6888.86	7631.73	3435.73
105.404	2949.85	2857.64	3293.69	4114.05	4414.07	4076.71	4210.02	3046.59	2968.48	3549.54	4717.81	4844.37	4852.89	5180.11			104.179	3365.35	3999.62	2703.75	3660.88	4014.96	3819.1	3989.84	3255.25	3661.03	4829.11			104.423	3889.61	4440.46	5600.09	5657.53	6089.2	5963.33	3098.66	3485.51	3647.06	3792.26	3808.72	4164.45	4588.62	4319.29	6379.68	6837.63	6798.55	7430.45	3463
106.838	2831.7	2853.25	3337.29	4231.18	4331.12	4113.35	4201.16	2964.75	3203.46	3559.45	4674.74	4840.39	4828.26	4907.42			105.679	3373.43	3943.15	2815.33	3743.43	4044.31	3835.69	4130.48	3207.22	3753.03	4956.61			106.036	3708.43	4384.05	5516.35	5522.08	6143.16	5927.72	3112.45	3466.73	3584.57	3797.54	3736.71	4186.68	4452.55	4313.96	6392.3	6889.71	6789.67	7443.85	3583.61
108.322	3110.27	2826.7	3241.08	3935.56	4295.61	4110.2	4125.9	3102.1	3024.34	3550.43	4441.1	4967.68	4807.88	5064.49			107.178	3501.55	3683.55	2707.45	3614.72	3923.81	3666.95	3974.6	3215.94	3658.38	4781.76			107.572	3705.74	4252.53	5496.25	5651.43	5983.9	5880.03	3024.32	3431.78	3694.4	3802.73	3858.4	4128.09	4313.68	4400.1	6293.41	6663.07	6588.71	7275.35	3563.32
109.935	3016.68	2811.37	3179.24	4121.97	4404.84	4126.58	4242.03	3018.83	3044.43	3646.33	4720.94	4894.57	4841.82	4831.34			108.7	3393.55	3914.7	2869.59	3684.71	3979.31	3614.44	4203.96	3369.3	3763.36	4790.19			109.159	3665.55	4217.19	5405.65	5336.02	5995.67	5840.36	3354.34	3587.05	3673.12	3676.24	3764.35	4103.92	4388.49	4039.2	6222.56	6567.22	6722.6	7319.8	3557.22
111.394	2786.43	2807.58	3234.63	4063.71	4130.64	3951.29	4093.22	2923.09	3152.26	3445.52	4542.46	4769.14	4805	4797.44			110.236	3525.98	3800.5	2806.55	3707.01	3970.45	3732.42	3858.07	3201.09	3689.15	4521.83			110.618	3643.73	4267.06	5387.46	5396.81	5974.03	5938.22	3039.79	3406.05	3630.34	3755.9	3735.98	4018.55	4424.01	4358.28	6037.6	6582.08	6755.55	7475.37	3506.84
112.956	2866.2	2803.54	3246.95	3965.68	4278.93	4123.77	4223.95	2984.41	2974.25	3427.54	4600.56	4850.33	4673.21	4827.88			111.783	3421.96	3845.45	2816.95	3794.08	4000.62	3535.99	3901.54	3123.89	3616.38	4864.51			112.128	3514.25	4220.84	5220.59	5382.53	5864.22	5847.24	3086.79	3551.46	3566.05	3910.97	3790.34	4077.97	4414.65	4295.51	6268.59	6582.69	6693.82	7279.14	3623.1
114.492	2959.54	2885.65	3297.68	3900.47	4138.82	3893.74	4045.83	2813.01	2935.97	3463.03	4611.8	4673.58	4694.33	4868.85			113.308	3239.08	4069.89	2719.52	3766.49	3922.23	3462.74	3990.37	3220.51	3655.11	4620.03			113.664	3464.7	4178.15	5216.6	5293.17	5902.81	5623	3125.8	3488.16	3813.58	3845.99	3807.76	4048.71	4318.45	4174.89	6172.18	6599.87	6506.78	7439.97	3514.39
116.002	2843.52	2896.22	3392.12	3910.34	4142.02	4109.74	4240.39	2915.63	2895.04	3434.56	4267.2	4706.87	4731.1	4819.62			114.829	3361.81	3749.76	2748.02	3538.78	3918.91	3719.91	3667.87	3286.27	3666.16	4615.99			115.175	3649.19	4240.39	5276.45	5417.29	5829.07	5610.15	3106.08	3552.51	3762.11	3725.7	3756.41	3944.5	4216.81	4122.23	6058.48	6341.28	6453.86	7378.15	3515.96
117.462	2840.98	2820.31	3144.16	3864.89	4306.89	3992.08	4315.85	2863.86	3140.04	3434.79	4359.7	4873.03	4496.59	4713.74			116.35	3274	3871.38	2868.87	3730.96	3869.16	3695.92	3841.13	3201.32	3669.18	4735.11			116.813	3671.66	4124.07	5203.95	5290.67	5768.1	5710.82	3187.19	3546.46	3655.07	3800.62	3760.19	4063.55	4395.22	4176.96	5907.06	6504.67	6598.92	7274.2	3489.2
119.074	2876.07	2743.52	3311.28	3919.84	4245.87	4045.86	3992.27	2781.65	2674.47	3427.64	4390.01	4788.68	4616.46	4784.09			117.857	3408.91	3884.55	2723.69	3506.78	3844.51	3650.66	3740.84	3034.47	3524.43	4564.31			118.298	3504.02	3975.88	5058.43	5148.4	5654.11	5698.64	3226.66	3473.57	3693.21	3848.41	3825.59	4035.2	4090.29	4189.49	5961.32	6419.44	6645.26	7211.62	3475.1
120.534	3023.05	2869.14	3158.83	3807.8	4261.16	4165.53	4205.07	2853.47	2951.69	3412.62	4520.42	4847.67	4641.38	4723.88			119.379	3367.42	3766.91	2762.38	3437.69	4017.14	3509.09	3931.91	3060.65	3600.57	4652.58			119.911	3485.57	4153.29	5040.26	5199.84	5730.18	5808.91	3115.18	3557.93	3545.33	3774.96	3796.4	4140.37	4202.39	4286.79	6269.95	6363.73	6289.06	6999.95	3606.09
122.07	2859.95	2853.28	3285.07	3872.38	4289.17	4047.35	4210.21	2663.88	2924.87	3426.51	4526.62	4662.95	4554.45	4662.83			120.907	3339.1	3817.52	2835.23	3685.33	3861.05	3503.28	3895.07	3133.53	3552.27	4308.27			121.37	3461.12	3911.17	5002.37	5126.9	5460.63	5537.13	3048.56	3607.56	3544.97	3723.68	3860.22	4105.01	4290.12	4040.39	6090.54	6325.16	6435.83	7145.28	3542.89
123.58	2967.66	2811.65	3280.13	3906.26	4286.75	4059.07	4123.43	2820.48	2810.49	3273.48	4454.41	4604.34	4674.1	4745.15			122.465	3429.38	3708.14	2750.11	3540.47	3862.62	3546.86	3854.46	3168.25	3415.99	4597.67			122.88	3344.93	4003.79	5004.4	5038.31	5583.97	5705.56	3240.21	3511.14	3619.92	3758.72	3794.97	3991.29	4166.31	4089.69	5840.48	6288.9	6491.06	7213.75	3475.83
125.142	2895.42	3035	3349.71	4030.81	4377.53	4167.33	4092.98	2842.44	2782.98	3543.34	4330.15	4601.54	4595.81	4738.16			123.976	3262.98	3813.82	2742.98	3725.91	3858.89	3557.53	3788.51	3081.64	3552.6	4473.26			124.391	3475.51	3928.63	4902.68	5176.52	5512.07	5609.45	3132.26	3481.21	3503.44	3799.08	3777.29	4030.67	4206.91	4069.51	5993.22	6322.79	6241.18	7006.64	3548.2
126.626	2862.91	2810.38	3377.99	3850.73	4320.46	3936.36	4139.49	2810.29	2859.76	3383.41	4312.01	4532.38	4652.96	4669.98			125.49	3336.21	3856.02	2802.26	3522.01	3989.54	3663.09	3607.35	2908.38	3560.21	4501.2			125.927	3289.61	3833.33	4748.43	4974.81	5453.01	5588.37	3176.97	3402.3	3615.74	3892.01	3675.57	4212.64	4098.12	3977.08	5768.41	6224.43	6324.63	6870.01	3432.38
128.162	2965.94	2741.85	3270.07	3944.76	4424.11	4138.36	4147.89	2816.29	2876.29	3374.39	4358.34	4729.58	4658.68	4589.78			127.011	3357.73	3626.88	2746.48	3601.16	3904.25	3612.74	3631.48	3112.23	3414.97	4293.65			127.514	3374.77	3984.83	4790.74	5021.37	5540.44	5478.54	3074.05	3533.43	3571.96	3824.94	3799.95	4091.76	4257	4064	5791.95	6251.22	6304.21	7055.92	3457.13
129.673	2868.36	2819.1	3345.36	3970.89	4298.35	4091.5	4138.78	2701.66	2871.38	3313.79	4168.73	4400.78	4421.75	4548.76			128.525	3357.91	3961.35	2813.69	3713.13	3938.69	3663.94	3666.12	2940.89	3471.62	4489.32			129.05	3396.52	4005.61	4800.71	4888.89	5507.59	5478.28	3128.07	3464.44	3757.64	3815.76	3938.03	3976.68	4225.35	4004.59	5792.68	6322.2	6320.67	6902.85	3479.98
131.209	2898.72	2838	3357.62	4002.16	4297.15	4204.68	4012.83	2780.24	2895.86	3411.67	4349.81	4588.7	4536.02	4639.93			130.076	3397.83	3779.56	2873.84	3723.62	3922.24	3565.01	3633.96	3071.46	3482.48	4256.58			130.637	3237.72	3879.07	4967.06	4930.6	5379.55	5371.52	3231.07	3313.39	3796.7	3880.27	3825.73	3939.38	4171.46	4050.22	6007.3	6311.09	6223.89	6923.16	3539.34
132.77	2781.54	2727.39	3222.29	3961.29	4385.41	4051.73	4152.6	2791.06	2823.87	3453.68	4171.59	4497.83	4332.47	4396.73			131.593	3204.76	3796.05	2787.68	3603.84	3953.96	3415.9	3725.87	2982.62	3303.52	4396.12			132.096	3195.03	3840.89	4789.35	4819.06	5388.73	5357.92	2993.77	3416.13	3665.13	3768.89	3860.76	4058.52	4027.47	4056.83	5801.29	6001.34	6346.29	6998.35	3410.7
134.281	2913.91	2809.69	3152.56	4089.1	4113.28	4079.92	4033.08	2717.15	2696.14	3367.58	4179.31	4370.73	4431.44	4713.74			133.162	3328.18	3816.48	2813.93	3508.37	3906.86	3697.51	3711.51	3017.33	3499.89	4357.43			133.607	3241.28	3806.53	4665.94	4995.34	5261.3	5436.85	3111.37	3538.55	3482.8	3793.66	3866.26	4120.6	4141.52	3986.26	5698.9	6110.46	5926.37	6910.98	3501.44
135.791	2759.64	2707.28	3191.9	3947.41	4421.36	3915.52	4011.05	2796.89	2834.1	3286.34	4134.81	4689.32	4532.73	4723.39			134.676	3359.26	3714.2	2776.23	3719.45	3998.6	3469.09	3655.53	2951.05	3401.69	4226.67			135.143	3303.77	3852.68	4801.89	5060.58	5327.57	5313.62	3176.77	3326.56	3436.23	3735.07	3888.81	3999.38	4025.1	4064.7	5720.01	6163.76	6230.22	6954.22	3398.18
137.353	2964.51	2877.48	3116.07	3914.78	4284.09	4033.34	4118.56	2794.53	2880.79	3332.44	4289.08	4396.25	4383.43	4691.32			136.201	3306.51	3878.05	2705.28	3541.09	3823.31	3600.03	3721.74	3070.65	3382.39	4325.81			136.653	3219.07	3792.19	4710.56	4787.51	5352.93	5361.46	3164.91	3429.25	3702.41	3822.61	3863.13	4033.84	4106.17	3931.58	5789.31	6203.47	6240.7	7019.45	3405.89
138.786	2831.88	2873.54	3227.82	3797.53	4338.37	4014.04	4220.61	2825.27	2946.1	3252.37	4133.16	4394.33	4481.17	4536.61			137.719	3366.15	3817.89	2807.22	3522.91	3868.28	3559.17	3519.75	3127.89	3583.26	4142.43			138.266	3311.76	3811.93	4717.99	4803.16	5177.33	5197.45	3162.59	3473.42	3596.04	3747.91	3820.01	4121.36	4138.62	3906.31	5832.22	6188.17	6080.13	6881.89	3595.42
140.348	2950.42	2880.55	3201.67	3958.62	4341.27	4124.27	3999.62	2593.14	2649.25	3252.5	4241.51	4440.77	4529.98	4587.27			139.241	3395.02	3820.72	2712.48	3652.64	3877.72	3529.85	3742.19	2942.23	3403.16	4226.38			139.776	3288.92	3745.2	4650.57	4653.22	5117.83	5173.29	3069.53	3519.47	3666.3	3795.66	3664.24	4077.77	4128.64	3811.42	5764.45	5965.79	6000.77	6586.47	3460.93
141.935	2910.59	2676.01	3151.59	3923.35	4293	4103.69	4117.13	2734.79	2814.97	3286.85	4079.39	4364.57	4396.27	4492.51			140.78	3336.7	3572.01	2716.46	3689.37	3899.5	3477.79	3580.17	2929.53	3390.35	4307.41			141.389	3159.7	3798.62	4510.18	4792	5194.73	5160.13	3160.79	3411.08	3652.39	3878.95	3686.33	4139.18	3960.72	3937.97	5692.03	6017.16	6071.76	6803.48	3516.36
143.497	3011.82	2916.57	3168.28	3761.19	4240.3	3963.77	4178.5	2652.32	2934.05	3272.61	4089.06	4383.94	4567.74	4633.18			142.309	3265.01	3878.42	2832.39	3633.05	3884.68	3616.55	3661.96	3101.59	3404.87	4280.86			142.823	3302.79	3611.32	4692.24	4663.99	4981.53	5290.95	3288.47	3511.39	3573.57	3789.53	3785.02	4048.14	4031.97	3882.55	5597.33	6101.69	5973.2	6822.47	3440.72
145.033	2852.15	2831.5	3203.92	3792.04	4285.15	3978.08	3985.18	2646.24	2880.86	3219.13	4078.19	4331.79	4587.55	4539.08			143.841	3355.53	3724.07	2755.44	3627.89	3677.02	3594.9	3762.37	2998.09	3413.94	4258.51			144.333	3064.85	3600.61	4662.69	4657.55	5242.03	5170.12	3184.73	3588.28	3672.99	3686.85	3856.07	4111.37	3864.94	4137.39	5574.09	6003.98	5992.76	6703.6	3446.62
146.543	2842.38	2786.26	3210.73	3931.67	4258.16	4139.75	3989.19	2751.41	2759.43	3313.14	4066.75	4167.27	4456.84	4523.04			145.366	3430.66	3740.25	2579.47	3675.56	3869.51	3581.05	3769.51	2972.16	3455.65	4165.46			145.869	3265.75	3682.86	4386.84	4585.99	5195.12	5024.05	3081.96	3550.36	3749.42	3688.96	3719.86	4232.06	4032.22	3801.54	5628.24	6073.62	5847.24	6657.95	3456.85
148.079	2779.86	2855.74	3285.62	3827.55	4222.6	3970	3923.83	2706.78	2617.17	3253.15	4080.62	4080.99	4483	4309.85			146.895	3231.3	3856.36	2632.48	3527.55	3835.39	3654.95	3479.93	2993.61	3188.62	4350.91			147.38	3218.95	3673.01	4378.45	4679.58	5032.74	5209.85	3189.23	3570.34	3583.37	3746.45	3826.06	4060.46	3962.96	3941.8	5501.9	6180.5	5828.41	6669	3505.35
149.538	2959.59	2827.07	3205.5	3879.12	4240	4012.49	4208.57	2689.81	2732.77	3232.35	4170.56	4414.34	4541.44	4469.88			148.42	3252.95	3690.62	2754.76	3539.14	3865.93	3514.89	3610.35	2987.99	3424.28	4262.54			148.992	3248.14	3550.65	4576.76	4511.72	5079.41	4943	3159.97	3480.65	3488.35	3697.32	3746.45	4078.76	3878.6	3849.88	5623.75	5945.78	5845.09	6410.59	3395.22
151.074	2919.56	2674.46	3213.57	3824.55	4374.93	4117.87	4128.72	2577.15	2702.88	3190.3	3854.46	4481.1	4229.35	4380.54			149.956	3280.42	3763.29	2745.85	3643.14	3569.28	3546.77	3647.77	2992.05	3312.45	4222.6			150.503	3081.31	3679.93	4448.7	4645.04	5202	5143.53	3057.5	3300.19	3674.52	3750.1	3752.44	4016.54	4132.65	3998.09	5627.8	6016.75	5876.14	6739.7	3311.63
152.687	2808.79	2840.04	3039.13	3943.9	4345.58	3975.02	3962.65	2635.17	2978.87	3222.42	4061.4	4321.67	4523.38	4338.41			151.499	3282.26	3841.29	2877.72	3429.95	3881.14	3627.74	3594.69	3005.57	3391.84	4115.99			152.116	3159.11	3612.77	4339.82	4402.04	5048.58	5131.99	3121.75	3519.37	3684.93	3767.78	3768.46	4165.95	4036.71	3835.48	5625.69	6106.91	5911.95	6583.25	3408.68
154.146	2959.09	2913.73	3223.35	3829.34	4187.76	4206.16	4090.49	2658.94	2660.22	3306.67	4096.32	4146.59	4349.67	4539.52			153.01	3412.7	3856.11	2691.26	3632.55	3766.55	3515.23	3658.4	2864.11	3466.95	4098.59			153.575	3093.81	3531.89	4240.91	4676.86	5041.07	5033.17	2999.64	3486.73	3753.24	3651.4	3737.08	4131.27	4012.18	4023.31	5482.69	6064.12	5900.6	6368.6	3480.15
155.631	2916.67	2857.01	3135.84	4037.32	4203.89	4135.53	4109.76	2877.99	2648.22	3292.78	4117.65	4387.19	4325.2	4467.21			154.542	3296.8	3718.55	2785.26	3535.49	3915.62	3441.54	3547.28	2873.88	3223.67	4120.89			155.085	3151.22	3693.95	4261.55	4483.47	4890.3	5150	3192.51	3687.34	3468.66	3764.92	3750.2	4038.54	3957.26	3778.5	5652.54	6056.72	5836.51	6425.07	3505.86
157.142	2807.22	2758.61	3222.96	3866.36	4185.91	4042.07	4120.46	2695.76	2714.53	3202.17	3969.52	4255.18	4386.2	4510.31			156.06	3491.29	3623.44	2746.36	3587.26	3883.47	3658.7	3573.23	3075.88	3305.7	4070.55			156.596	3166.03	3561.49	4435.32	4551.3	5008.62	5004.97	3223.83	3483.43	3577.17	3635.99	3557.41	4030.3	3907.62	3852.42	5630.41	5997.05	5915.44	6459.55	3364.14
158.678	2871.12	2764.74	3123.89	3924.83	4239.78	4076.49	4010.68	2526.46	2841.53	3209.3	4053.12	4198.54	4391.09	4186.61			157.588	3321.97	3744.32	2743.16	3660.45	3798.28	3555.5	3530.99	3010.68	3363.67	4160			158.106	3129.99	3537.95	4336.73	4445.21	4800.14	4950.2	3189.09	3333.86	3560.47	3832.94	3931.62	3956.6	3990.16	3788.8	5713.74	5809.71	5593.48	6407.57	3358.09
160.214	2875.86	2785.94	3254.13	3927.3	4174.1	4054.07	4127.55	2754.98	2787.16	3216.79	4043.52	4426.54	4398.65	4474.52			159.102	3261.18	3765.36	2686.64	3572.41	3951.18	3645	3506.16	3062.84	3374.01	4020.46			159.719	2933.25	3666.68	4225.1	4441.46	4881.28	5104.59	3040.68	3498.82	3611.61	3679.19	3807.31	4119.67	3812.99	3898.33	5484.56	5834.68	5756.02	6536.23	3475.41
161.75	2920.01	2844.55	3255.49	3786.17	4244.27	4179.39	3995.98	2731.16	2923.97	3279.99	3897	4072.11	4403.55	4519.8			160.627	3310.73	3736.53	2826.61	3516.53	3671.82	3523.06	3714.34	2869.13	3415.21	3951.21			161.152	2969.28	3487.3	4312.25	4439.78	4899.42	4762.67	3179.56	3444.78	3652.18	3590.67	3868.87	4259.16	3906.38	3967.09	5457.64	5791.17	5775.62	6229.23	3546.21
163.286	2745.14	2754.5	3098.69	4009.11	4142.84	4016.95	4206.26	2591.45	2843.6	3280.45	3820.27	4125.01	4422.95	4331.4			162.16	3191.31	3739.24	2731.4	3637.88	3854.25	3423.18	3631.97	2882.4	3383.9	4155.45			162.663	3258.23	3468.77	4415.45	4578.3	4643.6	4985.9	3069.73	3419.17	3769.15	3931.99	3763.53	4134.69	4043.53	3896.71	5456.93	5968.05	5899.19	6527.49	3371.39
164.822	2936.29	2662.07	3236.92	3921.56	4359.43	4051.16	3914.09	2690.49	2916	3211.36	3987.51	4283.28	4556.62	4254.65			163.656	3376.22	3699.97	2794.88	3588.94	3899.09	3699.14	3607.79	2986.85	3374.03	4031.7			164.199	3090.7	3616.54	4312.56	4350.87	4836.87	4868.42	3220.82	3536.57	3610.26	3886.64	3695.79	3968.88	3876.78	3871.06	5481.76	5782.16	5835.23	6469.83	3385.17
166.255	2920.41	2779.7	3179.05	3988.43	4227.26	3999.09	4078.06	2727.53	2665.48	3243.66	3959.34	4104.94	4406.29	4418.07			165.203	3294.02	3830.72	2781.51	3596.42	3723.43	3458.07	3604.06	3077.08	3211.75	4176.83			165.735	2964.88	3537.33	4189.21	4418.79	4749.36	4852.71	3076.05	3401.55	3722.88	3878.79	3673.11	4093.71	3997.54	3840.41	5348.32	5786.73	5566.28	6293.44	3366.29
167.817	2922.83	2747.45	3274.76	3852.76	4234.19	4065.33	4100.57	2899.91	2846.31	3276.62	3878.36	4178.15	4396.45	4322.85			166.728	3427.4	3599.23	2637.64	3612.95	3908.51	3638.03	3605.58	2982.99	3243.01	4266.49			167.245	3116.96	3562.38	4169.45	4319.67	4826.75	4858.74	3157.53	3476.15	3645.84	3796.93	3718.58	4100.48	4025.73	3877.82	5359.81	5869.55	5733.58	6471.61	3504.22
169.353	2933.88	2880.5	3203.65	4013.22	4257.3	4063.13	4026.7	2670.99	2851.21	3208.48	3959.24	4126.46	4440.82	4346.64			168.267	3272.77	3883.23	2783.66	3574.11	3727.89	3553.18	3572.61	3021.52	3377.3	3976.16			168.781	2928.58	3515.27	4239.85	4255.5	4683.44	4629.2	3073.56	3396.12	3680.24	3917.93	3785.17	4206.05	3953.51	3856.62	5235.85	5903.34	5698.21	6266.76	3433.33
170.966	2806.8	2780.16	3384.01	3868.02	4207.23	4034.21	4128.85	2704.52	2829.55	3226.59	3896.04	4260.64	4457.45	4394.93			169.789	3305.2	3900.01	2716.9	3589.92	3881.65	3597.56	3649.61	2922.25	3233.76	3971.21			170.368	3036.07	3543.89	4276.68	4461.74	4906.94	4661.04	3211.11	3429.16	3534.21	3781.68	3763.06	3959.72	3936.57	3859.07	5410.96	5908	5672.82	6441.15	3447.55
172.399	2866.59	2781.86	3064.87	3930.16	4289.2	4067.1	4069.11	2765.75	2601.51	3164.29	3721.82	4079.19	4481.48	4454.32			171.31	3412.71	3833.79	2703.9	3445.61	3841.57	3423.02	3530.4	2974.8	3247.93	4032.89			171.802	3218.45	3527.33	4202.55	4298.27	4647.68	4784.53	3251.77	3478.39	3522.87	3850.9	3782.09	4115.38	4042.03	3791.26	5414.04	5712.09	5554.42	6221.88	3486.54
173.935	2899.09	2786.45	3078.95	3957.64	4112.84	3954.83	4123.27	2741.59	2788.69	3292.69	3752.35	4210.47	4434.19	4437.38			172.846	3143.11	3818.39	2669.34	3581.9	3685.33	3557.45	3537.05	2874.45	3240.26	4102.08			173.312	3039.4	3568.96	4311.81	4324.2	4735.45	4784.44	3227.52	3553.99	3771.34	3814.62	3786.74	4160.43	3850.32	3787.24	5468.56	5729.51	5556.43	6173.94	3602.13
175.471	2822.66	2918.22	3274.26	3930.03	4153.58	4071.01	4090.56	2718.02	2836.28	3120.56	3885	4222.75	4231.93	4119.09			174.371	3362.95	3769.93	2752.21	3523.38	3704.4	3551.7	3512.95	3062.53	3201.48	4021.52			174.848	3228.98	3411.99	4203.56	4383.04	4519.67	4753.09	3186.49	3541.79	3708.7	3690.8	3784.99	4030.39	4003.46	3798.01	5396.52	5636.28	5485.35	6258.46	3456.1
176.93	2897.59	2663.56	3165.55	3830.91	4135.53	3991.1	3975.84	2666.77	2752.44	3233.07	3742.85	4161.48	4338.33	4428.91			175.922	3370.82	3647.85	2781.45	3625.11	3768.41	3581.72	3528.59	3091.81	3222.29	4082.78			176.359	2898.71	3595.51	4129.34	4250.21	4544.79	4669.9	3218.34	3477.23	3515.79	3910.19	3757.75	4030.94	3803.61	3778.54	5286.59	5775.33	5552.32	6208.7	3453.54
178.441	2862.67	2801.55	3349.24	3898.76	4092.62	4099.6	4081.47	2674.55	2764.3	3050.98	3724.39	4191.22	4399.28	4286.41			177.417	3305.16	3929.55	2726.5	3578.48	3966.3	3573.16	3613.04	3056.79	3464.15	3976.24			177.997	2994.67	3451.8	4283.51	4512.93	4669.19	4728.94	3067.26	3599.82	3616.74	3815.49	3750.02	3893.68	3782.47	3797.09	5488.62	5993.61	5443.53	6399.71	3466.43
179.977	2905.27	2841.11	3178.29	3818.4	4293.44	3938.89	4033.82	2669.35	2670.64	3129.05	3741.02	4022.65	4284.28	4364.93			178.975	3361.82	3751.05	2680.78	3587.62	3745.2	3496.31	3364.14	2847.55	3217.48	3951.88			179.508	3066.46	3397.43	4129.78	4148.81	4547.62	4704.85	3209.04	3573.07	3612.97	3772.59	3886.38	4100.18	4017.06	3645.99	5391.36	5664.89	5537.25	6016.65	3386.48
181.513	2795.78	2782.8	3297.71	3813.81	4256.12	4091.79	4033.79	2693.36	2708.05	3130.74	3828.09	3891.54	4428.78	4519.24			180.504	3318.59	3693.99	2674.23	3395.58	3835.03	3501.3	3408.07	2936.16	3143.82	4135.81			181.12	2946.25	3355.42	4009.91	4265.32	4465.01	4662.22	3157.38	3497.4	3535.4	3869.84	3840.24	4005.03	4091.51	3959.07	5288.44	5834.51	5468.86	6119.08	3465.35
EP2: Peak bar graph																	KOR: Peak bar graph													a2A-AR: Peak bar graph
Receptor		Receptor + 200 ng Gα15															Receptor		Receptor + 200 ng Gα15											Receptor				Receptor + 200 ng Gα15
Basal	Agonist	Basal	Agonist														Basal	Agonist	Basal	Agonist										DMSO_Basal	DMSO_Agonist	YM-254890_Basal	YM-254890_Agonist	DMSO_Basal	DMSO_Agonist	YM-254890_Basal	YM-254890_Agonist
4293	5163	4506	6679														3866	4948	3895	6135										2991	5276	3221	3899	3129	6212	3301	4148
4306	5186	4404	6675														4306	5732	4329	6661										3240	6034	3585	4026	3065	6144	3689	6036
2974	3691	2857	4098														3040	4011	3265	5168										3973	8027	3800	4439	3771	8831	4921	8704
3032	3446	2831	3980														3813	4800	3714	4873										3980	8218	3989	4330	4000	8697	4254	7549
3358	3856	3308	4294														4443	5526	4880	6701										4005	7065	3971	4303	4099	7587	4846	7387
4047	4622	3819	5168																											4011	6825	4192	4547	4655	8374	4636	6548
4397	5040	4199	5568
[truncated: 34 more columns]
