# Supplementary material for: Effector membrane translocation biosensors reveal G protein and βarrestin coupling profiles of 100 therapeutically relevant GPCRs
Source: eLife. 2022 Mar 18;11:e74101. doi: 10.7554/eLife.74101 (PMC9005190; doi:10.7554/eLife.74101)
Supplement: Figure 4—figure supplement 1—source data 1. [file elife-74101-fig4-figsupp1-data1.xlsx]

## Sheet: Figure 4- figure supplement 1
Source data for Figure 4- figure supplement 1
Figure supplement 1A
Nb GPCR coupling to x subtype of Gi/o
Nb of subtype	1	2	3	4	5
Nb of receptor	3	6	6	14	60
Nb GPCR coupling to x subtype of Gq/11+ G15
Nb of subtype	1	2	3	4
Nb of receptor	37	4	5	36
Nb GPCR coupling to x subtype of G12/13
1	2
20	29
Figure supplement 1B
	Gαs	Gαi1	Gαi2	GαoA	GαoB	Gαz	Gαq	Gα11	Gα14	Gα15	Gα12	Gα13
Gαs	100	55	52	48	70	61	42	39	45	94	48	61
Gαi1	23	100	95	94	96	81	42	38	47	80	35	44
Gαi2	23	100	100	95	97	84	41	37	47	80	36	44
GαoA	21	96	92	100	99	83	43	38	48	79	36	44
GαoB	27	89	86	89	100	84	39	35	45	81	38	45
Gαz	27	65	86	88	97	100	38	34	42	81	41	41
Gαq	34	80	76	80	80	68	100	90	100	98	46	61
Gα11	35	81	76	78	81	68	100	100	100	97	43	62
Gα14	33	82	78	82	84	69	91	82	100	96	42	56
Gα15	38	78	74	75	85	73	49	44	53	100	41	48
Gα12	46	80	77	80	91	86	54	46	54	94	100	83
Gα13	47	81	77	79	88	70	58	53	58	91	67	100
