# Supplementary material for: Effector membrane translocation biosensors reveal G protein and βarrestin coupling profiles of 100 therapeutically relevant GPCRs
Source: eLife. 2022 Mar 18;11:e74101. doi: 10.7554/eLife.74101 (PMC9005190; doi:10.7554/eLife.74101)
Supplement: Figure 4—source data 1. [file elife-74101-fig4-data1.xlsx]

## Sheet: Figure 4
Source data for Figure 4
Figure 4A: Venn diagram showing the numbers of receptors coupled to each G protein family in the EMTA ebBRET biosensor assay
	Gαs	Gαi/o	Gαq/11	Gα12/13	Gαs + Gαi/o	Gαs + Gαq/11	Gαs + Gα12/13	Gαi/o + Gαq/11	Gαi/o + Gα12/13	Gαq/11 + Gα12/13	Gαs + Gαi/o + Gq/11	Gαs + Gα12/13 + Gq/11	Gα12/13 + Gαi/o + Gq/11	Gαs + Gαi/o + G12/13	Gαs + Gαi/o + G12/13 + Gq/11
Nb of receptor	3	24	2	0	5	2	3	13	13	0	2	1	15	7	10
Figure 4B: Evaluation of receptors coupling promiscuity: number of receptors that couple to members of 1, 2, 3 or 4 G protein families.
Nb of family	1	2	3	4
Nb of Receptor	29	36	25	10
Figure 4C: Determination of G protein subunit coupling frequency: number of receptors that activate each Gα subunit.
G protein	Gαs	Gαi1	Gαi2	GαoA	GαoB	Gαz	Gαq	Gα11	Gα14	Gα15	Gα12	Gα13
Nb of Receptor	33	79	75	77	85	73	41	37	45	81	35	43
Figure 4D: Proportion of receptors recruiting βarrestins
	No βarr	βarr1	βarr2	βarr1+βarr2
Nb of Receptor	22	1	8	69
