# Supplementary material for: Effector membrane translocation biosensors reveal G protein and βarrestin coupling profiles of 100 therapeutically relevant GPCRs
Source: eLife. 2022 Mar 18;11:e74101. doi: 10.7554/eLife.74101 (PMC9005190; doi:10.7554/eLife.74101)
Supplement: Figure 5—figure supplement 1—source data 1. [file elife-74101-fig5-figsupp1-data1.xlsx]

## Sheet: Figure 5- figure supplement 1
Source data for Figure 5- figure supplement 1
Figure supplement 5A; A1 or A3 and Gi2+ Rap1GAP-RlucII/rGFP-CAAX
Log [Adenosine], M	A1				A3
-5.22	7106	7202	8557	6482	5740	6889	7748	7220
-5.88	7024	6970	8790	7195	5390	7034	7600	7038
-6.54	7181	7294	8299	6967	3970	6087	5996	6119
-7.19	7181	6595	8400	6621	2876	5080	4719	4526
-7.86	6486	6231	7935	6406	2106	3479	3142	2838
-8.52	6343	5633	7514	6327	1593	2750	2584	2037
-9.14	7133	5836	7705	6660	1545	2529	2185	1929
-9.84	6638	5412	7726	6328	1404	2377	2287	1802
-10.52	6626	5585	7210	6529	1474	2516	2229	1821
-11.22	6579	5537	7478	6596	1536	2495	2144	1746
-11.89	6686	5385	8159	6487	1533	2385	2358	1688
-13	6616	5628	7697	6581	1491	2210	2317	1776
Figure supplement 5B; 5-HT2C and Gq+ p63-RhoGEF-RlucII/rGFP-CAAX
Log[Serotonin], M	0				1x				2.5x				100x				200x
Vehicle	0.239	0.235	0.247	0.215	0.265	0.277	0.34	0.286	0.294	0.295	0.319	0.343	0.581	0.604	0.698	0.649	0.525	0.527	0.548	0.625
-4.3	0.236	0.259	0.247	0.23	0.498	0.531	0.556	0.482	0.65	0.728	0.713	0.626	0.617	0.673	0.76	0.649	0.599	0.588	0.624	0.533
-5.1	0.233	0.247	0.231	0.226	0.451	0.531	0.543	0.479	0.557	0.684	0.701	0.602	0.609	0.71	0.727	0.59	0.545	0.577	0.655	0.551
-5.8	0.229	0.229	0.278	0.224	0.457	0.532	0.598	0.489	0.579	0.683	0.856	0.607	0.618	0.652	0.674	0.614	0.536	0.572	0.683	0.553
-6.6	0.232	0.238	0.312	0.226	0.45	0.504	0.584	0.471	0.585	0.647	0.835	0.604	0.624	0.668	0.744	0.608	0.542	0.581	0.633	0.549
-7.3	0.232	0.232	0.287	0.225	0.443	0.492	0.578	0.489	0.605	0.657	0.781	0.616	0.662	0.675	0.705	0.671	0.54	0.602	0.633	0.564
-8.3	0.24	0.244	0.261	0.214	0.443	0.517	0.582	0.499	0.612	0.685	0.782	0.613	0.754	0.758	0.819	0.713	0.681	0.718	0.726	0.627
-9.2	0.241	0.245	0.292	0.215	0.433	0.48	0.67	0.471	0.592	0.66	0.729	0.58	0.85	0.914	0.953	0.83	0.766	0.769	0.943	0.7
-10.2	0.24	0.236	0.276	0.21	0.375	0.395	0.459	0.412	0.498	0.589	0.6	0.519	0.834	0.855	0.868	0.806	0.728	0.782	0.803	0.728
-11.1	0.217	0.237	0.304	0.228	0.291	0.311	0.359	0.316	0.367	0.385	0.463	0.387	0.662	0.677	0.778	0.719	0.612	0.612	0.627	0.648
-12	0.209	0.259	0.269	0.204	0.284	0.296	0.325	0.28	0.303	0.315	0.382	0.342	0.584	0.604	0.741	0.664	0.525	0.527	0.624	0.568
-13	0.211	0.233	0.238	0.204	0.274	0.268	0.314	0.284	0.306	0.287	0.324	0.316	0.572	0.578	0.602	0.636	0.501	0.528	0.624	0.557
