# Supplementary material for: Effector membrane translocation biosensors reveal G protein and βarrestin coupling profiles of 100 therapeutically relevant GPCRs
Source: eLife. 2022 Mar 18;11:e74101. doi: 10.7554/eLife.74101 (PMC9005190; doi:10.7554/eLife.74101)
Supplement: Figure 5—source data 1. [file elife-74101-fig5-data1.xlsx]

## Sheet: Figure 5
Source data for Figure 5
Figure 5A, left (A1 receptor constittive activity detection)
0	1x	4x	10x
100		343	380
100		318	435
100	259	425	490
100	259	450	522
100	197	315	382
100	204	349	396
Figure 5A, left (A1 receptor Inverse agonist activity detection)
Log [Compound], M	Mock + Adenosine				A1 + Adenosine							Log [Compound], M	Mock + DPCPX						A1 + DPCPX
-3.52289	-1.19641	2.26463	0.52699	3.048	113.488	129.739	136.576	144.808	137.886	125.666		-4.22186	2.99103	4.21592	-1.80886	0.384561	3.27589	0.498504	6.15297	10.6253	10.3404	9.5428
-3.84049	-0.868822	0.712149	-0.384561	5.05626	112.434	118.957	136.562	144.581	125.438	120.866		-4.58217	2.1222	7.20695	-3.10497	0.640934	1.88007	1.59521	8.44609	11.6508	7.99031	8.43185
-4.15799	-2.0225	3.2474	0.398804	2.27888	116.066	129.611	131.619	141.148	118.915	113.673		-4.94207	0.28486	7.20695	-1.31035	-0.370318	1.43854	1.95129	8.2182	10.0555	10.5256	8.91611
-4.47654	-2.27888	3.73166	0.014243	0.826093	114.357	130.537	129.925	144.452	128.871	109.614		-5.30125	3.3471	8.90187	-0.640934	-0.242131	1.75189	-0.726392	7.89061	11.6792	10.0698	8.04729
-4.79602	-0.14243	3.06224	1.13944	1.88007	113.104	131.619	123.786	135.764	130.352	109.116		-5.66564	1.6237	7.06452	-0.826093	-0.797607	3.91682	1.3246	8.57428	12.9041	9.99858	8.16123
-5.10797	-0.997009	2.90557	1.28187	1.03974	125.182	140.037	121.991	140.892	130.195	111.622		-6.01777	3.048	4.55776	-1.55249	0.327589	2.66344	0.0854579	7.8194	12.2347	11.8217	7.10725
-5.42025	0.199402	4.24441	-0.014243	0.754878	122.846	144.994	120.268	141.262	118.473	110.483		-6.39796	4.07349	8.17547	-0.299103	0.640934	3.00527	0.940037	9.00157	10.0698	8.87338	7.67697
-5.74716	-0.256374	2.82011	-1.95129	-0.697906	122.475	140.051	130.124	136.32	113.958	111.651		-6.74474	4.94232	6.73693	-1.80886	-1.59521	3.57499	0.270617	8.51731	9.31491	10.8959	9.7422
-6.06551	-0.868822	6.11024	-1.39581	0.0712149	122.817	140.507	116.451	131.577	116.921	109.771		-7.10791	2.42131	7.87637	-2.20766	0.256374	2.32161	0.626691	11.0526	11.9214	11.3089	6.97906
-6.37675	-1.25338	3.1477	-0.413047	-0.384561	123.088	142.003	129.326	133.97	119.684	109.913		-7.46852	1.43854	7.54878	-1.19641	0.66942	1.11095	-1.33884	11.2662	15.3397	11.7789	11.8786
-6.69897	2.72041	6.75118	-2.13645	-0.697906	138.314	143.84	120.396	138.983	117.049	109.144		-7.79588	2.50677	8.00456	-1.4243	-1.28187	2.33585	-0.014243	24.6404	21.1936	14.4566	17.4477
-7.00017	-2.47828	2.27888	-0.655177	2.09372	111.124	120.624	133.015	139.866	133.67	121.151		-8.31878	3.41832	8.20396	-1.83735	-0.470019	2.37858	2.22191	39.8234	43.2275	28.0729	32.1037
-7.31884	-2.82011	1.45278	-1.9228	0.640934	102.621	120.781	131.05	136.106	129.981	114.756		-8.68614	4.89959	5.32688	-0.783364	0.911551	1.53824	1.53824	74.0208	82.6093	49.4801	56.3168
-7.63831	-2.23615	1.83735	-2.22191	-0.156673	106.124	118.473	122.888	129.341	116.849	108.19		-9.05552	3.48953	8.98732	-1.55249	0.370318	1.65219	1.38157	93.5622	99.9003	70.6025	75.4593
-7.95863	-2.82011	2.69192	-1.73764	2.6492	96.8096	111.936	120.638	118.701	111.266	104.501		-9.42022	3.29013	8.03304	0.783364	2.39282	4.04501	1.58097	97.1514	104.857	88.4632	88.748
-8.27573	-2.76314	1.06822	-0.583962	0.52699	91.9812	113.488	117.918	125.11	113.403	100.584		-9.79588	5.41233	7.33514	-2.89133	1.39581	4.60048	1.28187	106.538	111.793	90.8987	89.0614
-8.59346	-3.91682	3.2474	-1.7234	0.470019	92.3088	109.799	110.953	125.253	104.059	98.1057		-10.0969	4.25865	9.77069	-1.58097	-0.655177	2.46404	1.3246	102.008	113.816	96.6387	87.6371
-8.92082	-3.6462	3.46105	-1.31035	0.940037	86.9392	109.386	109.343	117.747	102.122	90.2436		-10.3979	1.6237	8.18972	-0.541233	0.398804	3.60348	0.81185	107.349	110.568	88.748	89.5741
-9.22185	-2.52101	3.1477	-1.48127	0.555476	83.0366	104.9	107.734	114.214	90.6566	91.383		-10.8861	2.03675	7.10725	-1.49551	-0.498504	2.93405	-0.185159	106.566	113.816	87.5089	92.1948
-9.52288	-2.97678	2.91981	-1.78037	0.598205	78.664	101.367	103.732	110.184	91.2263	95.428		-11.0969			-2.13645	-0.341832	2.44979	-1.03974	103.034	111.807	84.5891	84.1476
-9.82391	-2.13645	1.13944	-0.683663	-0.840336	83.0081	96.7953	106.324	113.631	91.3403	84.0621		-11.3979			-2.79163	-1.31035	4.13047	0.455776	102.663	106.666	91.853	88.1356
-10.301	-0.754878	4.58624	-1.05398	-2.17918	90.3717	111.95	107.663	116.451	91.3688	91.1978		-11.8861			-1.4243	-0.840336	2.07948	0.541233	103.447	112.363	89.4317	91.0839
Vehicle	-3.15482	1.48839	-0.947159	-0.242131	101.937	97.7923	112.918	117.284	97.3294	91.1765		Vehicle	1.27475	5.17733	-1.90856	-2.41419	1.74477	0.676542	108.382	114.727	91.91	91.9812
Figure 5A, right (CB1 receptor constittive activity detection)
0	1x	2.5x	10x	20x
103	126	152	266	323
99	122	160	271	331
98	123	153	268	327
100	122	160	263	315
Figure 5A, left (CB1 receptor Inverse agonist activity detection)
Log [Ribomanant], M	0x				1x				2.5x				10x				20x
-12.5	103	99	98	100	126	122	123	122	152	160	153	160	266	271	268	263	323	331	327	315
-11.8861	100	100	100	105	128	117	128	125	159	154	157	161	272	270	284	259	345	333	334	325
-11.699	103	97	106	105	125	122	123	124	159	154	163	164	279	262	286	268	329	319	347	327
-11.2218	103	94	105	106	128	123	132	130	159	150	159	168	277	261	287	280	323	327	351	316
-10.7959	106	97	104	104	130	125	129	134	161	155	168	172	289	259	296	274	339	315	351	331
-10.4437	105	100	106	113	127	121	131	130	161	151	166	172	285	262	293	274	326	326	359	335
-10.0969	104	100	105	113	122	119	130	130	159	145	163	168	268	256	294	276	324	309	349	334
-9.73519	98	98	103	107	116	115	125	126	150	137	147	160	262	240	270	267	317	300	345	325
-9.35657	99	97	104	108	111	111	122	121	140	132	138	153	242	230	237	251	294	280	316	311
-9.01777	102	99	110	109	110	107	120	120	130	116	125	137	201	190	191	213	261	239	262	280
-8.65767	100	94	103	109	102	102	115	112	118	108	119	135	166	145	157	181	207	184	196	222
-8.30125	105	93	105	109	101	100	116	110	114	106	121	120	128	121	138	137	144	130	147	150
-8	101	99	106	105	111	99	105	106	113	105	111	119	133	118	130	132	130	117	125	119
-7.61979	104	101	106	106	110	100	103	108	118	106	105	123	129	116	123	125	119	106	120	119
-7.25181	100	101	100	109	112	102	104	109	115	107	109	118	125	114	123	125	115	105	116	111
-6.86647	104	102	108	111	104	99	107	111	117	103	116	119	126	106	121	127	120	103	120	114
-6.48947	101	100	106	109	106	102	111	113	120	103	117	124	124	109	123	127	114	96	112	118
-6.11922	100	101	104	105	102	102	110	108	118	105	113	124	127	106	123	126	112	102	115	116
-5.73526	97	97	103	104	100	101	112	108	111	102	110	116	119	107	125	128	110	101	113	115
-5.35674	98	100	105	105	97	98	109	107	111	97	103	116	121	105	119	122	113	98	115	111
-4.97679	101	94	103	101	96	93	105	103	112	97	102	112	117	97	116	122	115	94	106	113
-4.59969	98	94	107	101	101	98	107	102	112	94	114	114	126	101	115	122	114	94	109	114
-4.22186	103	103	119	102	109	110	125	109	115	101	124	122	129	106	125	125	118	106	123	115
Figure 5B; AT1R: Gq+ p63-RlucII/rGFP-CAAX
Log [Compound], M	Ang II				SII				Saralasin				TRV027
Vehicle	0	0	0	0	0	0	0	0	0	0	0	0	0	0	0	0
-5.22185	100	100	100	100	-1.9	6.8	6	7.5	0.3	7.6	8	8	1.1	6.2	4.5	5.4
-5.88207	91.4	107.5	106.9	96.7	3.6	5.3	5.7	8.7	-0.5	5.7	9.8	8.7	0.9	0.9	5.1	4.9
-6.54061	91.2	93.2	94.9	93.6	-0.6	-0.9	3.4	5.7	-0.5	7.6	5.7	8.2	-0.4	5	4.5	4.7
-7.19382	99.2	107.3	95.7	102.6	0.9	1.6	1.3	6.3	-2.5	6.2	8.4	7.8	-0.4	3	3.4	4.7
-7.86012	93.2	108.8	92.2	111.8	1.1	3.2	1.6	4.8	1.1	7.9	9	5.3	-1	6.7	2.5	2.8
-8.52288	95.2	96.6	99.3	102.4	-2.6	2.9	-0.1	6.1	-4.2	5.6	5.8	5.1	-1.3	5.1	1.3	1.7
-9.14267	42.8	49.3	47.5	46.9	-1.5	4	0.3	6.4	-2.3	5.3	4.7	4.2	-1.7	5.3	2	1.7
-9.82974	19.1	20.7	20.9	24.1	-2.4	2.8	-0.4	6.1	-2.2	9	3.3	4.3	-3.2	3.9	-0.5	-1
-10.5229	6.7	12.3	9.3	9.2	-1.5	-1.5	1.8	5.7	-0.6	0	3.2	2.4	-0.7	3.7	1.6	2.1
-11.2218	1.3	6.3	3.8	3.1	-2.2	4.2	0.4	6	-1.7	2.6	3.7	4.5	-2.9	4.4	0.3	-0.3
-11.8861	4.4	9.3	1.7	3.7	-2.4	5	1.4	6.3	-0.9	4	3.6	1.8	-1.5	2.9	2.1	1.5
Figure 5B; AT1R: Gi2+ Rap1GAP-RlucII/rGFP-CAAX
Log [Compound], M	Ang II						SII						Saralasin						TRV027
Vehicle	0	0	0	0	0	0	0	0	0	0	0	0	0	0	0	0	0	0	0	0	0	0	0	0
-5.22185	100	100	100	100	100	100	21.8	6.7	-4.4	31	36.4	70.9	23.6	36.4	12.5	21	20.2	39.8	37	19	6.2	25	13.1	46.3
-5.88207	107.2	113.8	60.1	55	87.6	88	20	9.9	-16.5	24	6.2	25.9	18.2	27.9	6.6	9	-18.2	12.4	29.6	46.7	-5	28	11.8	26.1
-6.54061	122.6	121.2	56.3	79	143.5	94.6	4.3		-5.5	7	18.4	31.3	7.6	40	1.1	4	14.6	37.9	19.9	37.9	-6	41	7.2	40.5
-7.19382	116.8	96.2	68.2	81	104	95.9	3.4	7.7	-15.3	16	5.9	25.7	8.8	41.2	5.9	9	7.2	35.5	15.9	31.1	-3.9	5	12.1	50.7
-7.86012	130.9	114.1	76.4	83	133.5	119.2	6.9	7.1	-2.3	7	-3.2	6	7.7	49.8	11.2	11	1.6	29.3	9.8	27	0.4	11	-16.6	-2.4
-8.52288	78.9	69.1	47.5	60	93.8	74.6	10.8	14.7	-15.5	9	-4.7	24.2	3.6	47	2.2	3	8.8	21.7	10.1	31.8	0.4	6	9	4.9
-9.14267	31.6	8.9	21.1	32	9.5	48.6	4.9	5.7	-5.9	6	-4.1	-8.9	-0.2	33.7	-2	-7	-6.7	4	0.3	17.1	-4.6	5	-24.2	-14.1
-9.82974	11.2	7.4	5.3	17	13.1	13.5	0.9	2.7	-11	-8	11.6	-2.8	-9.9	18.3	-11.8	-9	-8	1.5	5.1	18.4	-21.8	1	-14.1	-32.4
-10.5229	15.7	0.8	9	8	-13.4	-10.8	18.5	7.9	-12.9	10	-13.3	11.8	8.9	15.9	-7	-9	-11.6	-5.1	16.5	11.3	-10.6	6	-18	2.2
-11.2218	17.7	-2.8	10.3	3	25.2	7.1	17.9	3.9	-7.6	7	16.1	-0.9	11	22.7	-0.4	-9	2.8	24.4	9.1	18.5	-3.2	8	-2.6	-1.3
-11.8861	7.5	-1.1	8.1	2	47.7	35.8	15	10.6	-1.8	9	47.9	34.2	12.8	21.8	6.2	-7	6.3	33.8	3.7	48.6	-7.3	6	36.6	44.7
Figure 5B; AT1R: G13+ PDZ-RlucII/rGFP-CAAX
Log [Compound], M	Ang II				SII				Saralasin				TRV027
Vehicle	0	0	0	0	0	0	0	0	0	0	0	0	0	0	0	0
-5.22185	100	100	100	100	8	6.2	8.3	7.8	14	14.8	16.1	13.9	23.9	19.5	25.6	26.4
-5.88207	99.7	90.3	96.5	93.8	5.4	6.6	9.3	6.1	12.4	14.9	17.4	15.9	20	19.3	24.3	27.5
-6.54061	94.4	90	111.2	107.3	1.5	1.7	5.7	5.2	10.8	14	16.9	15.9	17.8	19.7	24.6	23.5
-7.19382	96.6	99	95.2	104.5	0.4	0.9	3.4	1	15	14.4	19.4	17.2	14.7	12.8	16.7	16.8
-7.86012	95	94	97.1	103.1	-2	0.3	1.3	0.2	13.5	12.6	15.4	13.9	6.8	7	7.6	7.9
-8.52288	62.5	57.9	83.7	67.7	-4.4	-0.9	1.3	-0.4	-0.2	7	10.1	5.8	0.1	2.1	3.9	2.6
-9.14267	10.9	9.9	9.4	10.3	-3.6	-0.8	2.5	0.5	-3.7	1.2	1.2	1.4	-0.5	-0.9	2.2	0.5
-9.82974	6.3	3.2	4.2	3	-4	-0.7	0.2	-0.1	-3.6	1	0.3	1.5	-3.1	-0.6	1.4	0.7
-10.5229	1.8	0.4	1.4	1.6	-3.9	-1.4	0.7	0.8	-5.5	0	2.1	0.7	-3.5	-2.1	0.2	1
-11.2218	0.1	0.1	0.7	0.9	-3.3	0.1	1.3	1.2	-4.5	1.3	0.4	0.3	-2.2	-0.8	1.6	1.6
-11.8861	1.6	-0.1	2.9	1.4	-2.1	0.7	2.1	1.5	-4.2	0.5	0.9	0.4	-0.5	0.6	2.8	2.5
Figure 5B; AT1R: barr2-RlucII/rGFP-CAAX
Log [Compound], M	Ang II				SII				Saralasin				TRV027
Vehicle	0	0	0	0	0	0	0	0	0	0	0	0	0	0	0
-5.22185	100	100	100	100	39	39	53.6	46	74	112	83.9	81.7	85	76.9	76.9
-5.88207	97	107	92.7	95.6	10	49	37.5	27.2	79	117	85.8	87.7	104	80	77.6
-6.54061	85	117	96.4	100.4	-2	6	11.6	5.9	77	119	85.2	79.2	90	77.1	79.2
-7.19382	94	115	96.9	100.5	-3	3	3.9	1.4	80	108	84.5	70.7	69	63.2	51.6
-7.86012	89	106	92.7	97	-7	2	2.6	1.3	57	79	69.9	61.8	48	36.8	22.5
-8.52288	53	61	65.6	52.7	-11	2	1.7	0.6	16	32	31.2	27.6	6	4.2	4.9
-9.14267	13	14	15.8	12.2	-12	-4	1	0.9	6	9	6.9	5	10	0.4	-0.3
-9.82974	-15	1	4.2	3.4	-10	4	2.1	1.9	-2	-1	2.5	1.3	11	-0.6	1.1
-10.5229	-9	-3	0.9	2.8	-6	-4	2.2	0.8	-1	0	1.9	1.2	9	0.4	1.2
-11.2218	-4	1	-0.2	0.5	-5	-2	2.1	1.9	-3	-3	1	-1.6	5	-0.7	0.8
-11.8861	-13	-7	0.9	0.2	-9	-9	0.8	1.8	1	-2	1	0.3	8	-0.6	-1.1
Figure 5C; GPR17: Gq+ p63-RlucII/rGFP-CAAX
Log [MDL 29,951], M	WT			Asp128Asn			Arg129His
Vehicle	2.3819	1.7128	1.14299	-3.94054	-7.17993	-3.54952	1.23622	-2.3719	0.46988
-4.69897	100.486	103.979	102.032	-1.30973	0.7129	-4.78034	-1.64919	-3.58454	-0.607088
-5.11724	94.9908	102.767	74.3961	1.97879	-3.64837	-3.47259	-1.11878	-1.94641	-4.35725
-5.53474	102.353	83.4067	65.3188	0.260277	-3.64837	-2.06869	0.875548	-3.09523	-3.91492
-5.95083	96.285	86.683	55.1837	-1.22486	-5.64816	-2.04946	-0.949049	-1.86131	-3.70337
-6.35656	72.0773	60.8133	24.0286	-2.15837	-8.116	-4.76111	0.132979	-2.2017	-2.04946
-6.79049	31.2996	25.5402	3.9508	-2.54027	-8.3713	-7.41507	-2.03108	-2.39317	-3.74184
-7.20761	5.22488	7.24416	-0.0878356	-3.66473	-11.9454	-4.20339	-1.22486	-2.2868	-2.261
-7.61979	3.08204	1.84045	-0.895562	-2.43419	-9.90306	-6.49195	-2.85851	-1.98896	-4.12647
-8.09691	0.0905468	-0.0955299	4.79699	-4.23757	-9.86051	-1.29943	-2.5827	-2.43572	-2.58794
-8.39794	-1.03391	-1.32945	1.41223	-2.92216	-10.7328	-3.95338	-0.54594	-1.60602	8.62407
-8.88606	-2.37054	2.49995	4.18158	-2.81608	-10.4775	-6.7035	-1.75527	-4.24405	-4.28032
Figure 5C; GPR17: Gi2+ Rap1GAP-RlucII/rGFP-CAAX
Log [MDL 29,951], M	WT			Asp128Asn			Arg129His
Vehicle	-0.150446	-1.38353	-0.331084	2.67439	-13.9042	14.0736	-20.3019	-28.4785	-17.64
-4.69897	93.1671	95.1654	108.75	86.161	60.3618	104.186	-12.5126	-19.5439	-12.512
-5.11724	96.2157	104.131	95.0088	82.5949	70.9055	103.937	-17.2114	-24.402	-16.4285
-5.53474	91.447	86.0009	88.4205	81.5181	60.2852	104.037	-21.4486	-28.1414	-13.5907
-5.95083	100.439	94.016	96.353	81.686	68.055	103.522	-21.1549	-30.2409	-18.6191
-6.35656	105.963	109.709	108.285	74.9455	63.059	89.7315	-20.5956	-29.5973	-20.2288
-6.79049	110.438	104.131	55.2465	82.9585	65.1432	81.7492	-22.1338	-27.1759	-11.2674
-7.20761	99.1524	108.912	24.4457	74.0785	62.0016	50.4173	-23.9938	-26.8694	-12.6116
-7.61979	73.0296	78.7674	3.18712	73.0576	56.6224	20.6453	-24.5391	-29.49	-30.9494
-8.09691	37.3416	47.5499	3.07095	46.4874	34.692	16.1812	-24.1196	-27.4517	-16.8102
-8.39794	13.2745	13.3593	-3.26845	21.6651	-0.142192	10.3729	-22.2177	-26.6242	-15.1009
-8.88606	2.10103	5.40554	-1.77487	18.5187	2.07997	7.35253	-23.0708	-26.287	-19.648
Figure 5C; GPR17: barr2-RlucII/rGFP-CAAX
Log [MDL 29,951], M	WT			Asp128Asn			Arg129His
Vehicle	3.31142	0.988149	14.7454	-40.2777	-44.6997	-9.73409	65.7929	61.4066	72.1934
-4.69897	104.306	95.688	100.081	-37.0996	-25.0865	-8.66538	107.352	108.383	168.78
-5.11724	96.2942	99.594	73.7461	-38.8873	-29.138	-13.0612	99.4282	102.939	138.514
-5.53474	95.3231	93.3195	54.3279	-35.6208	-33.7088	-11.1859	92.4098	97.9527	133.392
-5.95083	93.3368	104.871	66.1643	-39.2183	-32.5661	-13.4443	87.5764	86.6502	87.6393
-6.35656	84.7072	75.4724	54.469	-40.8074	-19.8924	-7.29421	72.6568	77.1761	82.1143
-6.79049	60.187	57.9369	31.7237	-36.4816	-35.0385	-9.87524	61.2905	64.0868	88.7282
-7.20761	32.0692	41.7103	25.3921	-35.665	-37.1993	-12.6579	54.4045	63.2142	74.9156
-7.61979	20.9016	20.0819	25.8559	-38.7769	-39.0484	-13.9888	59.3704	57.2097	78.2427
-8.09691	-1.47786	6.32774	18.0321	-41.0502	-40.7313	-17.4369	55.4639	58.1862	54.832
-8.39794	-0.904031	-1.00641	13.1322	-40.2115	-41.9987	-13.3435	51.8664	52.3272	81.4085
-8.88606	2.31825	3.66833	19.3428	-40.1232	-41.8325	-12.0127	58.7965	54.8204	79.7349
