# Supplementary material for: Effector membrane translocation biosensors reveal G protein and βarrestin coupling profiles of 100 therapeutically relevant GPCRs
Source: eLife. 2022 Mar 18;11:e74101. doi: 10.7554/eLife.74101 (PMC9005190; doi:10.7554/eLife.74101)
Supplement: Figure 6—figure supplement 1—source data 1. [file elife-74101-fig6-figsupp1-data1.xlsx]

## Sheet: Figure 6- figure supplement 1
Source data for Figure 6- figure supplement 1
5-HT1A					5-HT1B					5-HT2A						5-HT2B
Log [Serotonin], M	Mix Gz/G15/16				Log [Serotonin], M	Mix Gz/G15/16				Log [Serotonin], M	Mix Gz/G15/16					Log [Serotonin], M	Mix Gz/G15/16
-4.22	296	375	341		-4.22	198	216	209		-4.22	382	317	449	430		-4.22	167	264	230
-4.97	297	366	314		-4.97	169	224	196		-4.97	357	303	393	366		-4.97	166	239	189
-5.73	292	384	353		-5.73	187	230	221		-5.73	357	327	407	384		-5.73	155	249	224
-6.47	281	350	320		-6.47	181	213	212		-6.47	340	291	386	368		-6.47	152	249	206
-7.22	256	318	309		-7.22	170	214	193		-7.22	277	245	326	306		-7.22	163	237	215
-8.22	206	284	251		-8.22	162	196	171		-8.22	166	132	153	144		-8.22	130	208	161
-9.16	144	195	169		-9.16	136	163	152		-9.16	118	100	112	113		-9.16	107	163	148
-10.1	96	121	104		-10.1	106	139	129		-10.1	112	96	109	115		-10.1	93	135	113
-11.02	96	112	94		-11.02	94	114	106		-11.02	103	93	102	118		-11.02	93	119	104
-11.92	110	103	102		-11.92	97	109	112		-11.92	94	93	104	108		-11.92	97	126	116
-12.89	102	110	139		-12.89	98	100	119		-12.89	93	106	100	112		-12.89	98	108	117
Vehicle	100	100	100		Vehicle	100	100	100		Vehicle	100	100	100	100		Vehicle	100	100	100
α1A-AR						α2A-AR						β1AR							β2AR
Log [Noradrenaline], M	Mix Gz/G15/16					Log [Noradrenaline], M	Mix Gz/G15/16					Log [Noradrenaline], M	Mix Gz/G15/16						Log [Noradrenaline], M	Mix Gz/G15/16
-4.22	323	325	249	238		-5.22215	337.599	381.77	369.12	395.49		-4.22	342	343	337	419	285		-4.22	201	238	177	240	192
-4.88	300	334	249	217		-5.88796	331.904	368.17	351.43	399.45		-4.88	363	349	309	315	247		-4.88	200	231	156	202	171
-5.54	309	319	243	249		-6.55296	335.462	343.86	355.31	373.51		-5.54	350	344	316	343	251		-5.54	171	195	137	186	163
-6.19	287	289	217	196		-7.22101	326.581	384.63	314.61	336.69		-6.19	302	295	261	318	227		-6.19	130	161	126	150	127
-6.86	235	246	188	156		-7.88796	325.733	314.65	298.82	315.25		-6.86	262	232	208	231	197		-6.86	111	127	106	122	116
-7.52	163	193	153	138		-8.55296	312.734	319.89	324.38	369.12		-7.52	191	182	168	178	152		-7.52	102	116	99	114	103
-8.1	131	134	111	111		-9.21899	270.959	324.04	297.76	308.26		-8.1	150	143	132	137	144		-8.1	91	116	102	108	109
-8.8	126	108	112	114		-9.8928	231.302	243.11	232.3	261.88		-8.8	107	106	113	111	112		-8.8	93	108	95	107	107
-9.49	147	104	111	105		-10.5528	134.089	144.39	147.96	149.06		-9.49	90	90	108	110	101		-9.49	105	104	96	104	103
-10.22	119	107	109	117		-11.0969	104.542	96.96	112.28	121.08		-10.22	92	85	117	111	108		-10.22	94	99	98	100	101
-10.89	130	94	107	113		-11.585	99.6981	102.86	116.85	109.65		-10.89	92	88	115	106	113		-10.89	95	104	102	103	107
Vehicle	100	100	100	100		Vehicle	100	100	100	100		Vehicle	100	100	100	100	100		Vehicle	100	100	100	100	100
A2A							CB1					CB2						CCK1
Log [Adenosine], M	Mix Gz/G15/16						Log [WIN55, 212-2], M	Mix Gz/G15/16				Log [WIN55, 212-2], M	Mix Gz/G15/16					Log [CCK8], M	Mix Gz/G15/16
-5.22	178	186	192	208	202		-4.22	264	284	262		-4.97	201	197	140	155		-5.46	392	369	360	287
-5.88	168	178	186	190	162		-4.97	233	271	223		-5.73	188	186	128	155		-6.11	394	381	322	262
-6.54	153	164	186	202	161		-5.73	222	231	193		-6.47	185	188	123	138		-6.75	394	393	347	286
-7.19	124	140	146	155	127		-6.47	216	234	197		-7.22	181	189	127	131		-7.4	386	383	337	271
-7.86	108	120	123	124	109		-7.22	212	212	176		-8.22	193	180	125	111		-8.05	354	367	280	259
-8.52	95	114	118	106	96		-8.22	172	172	162		-9.16	173	154	117	113		-8.7	239	298	244	238
-9.14	90	115	105	111	99		-9.16	118	107	111		-10.1	126	110	98	106		-9.3	148	190	146	156
-9.84	102	105	104	107	108		-10.1	102	100	95		-11.02	103	98	92	96		-10.03	106	137	100	125
-10.52	98	107	100	94	99		-11.02	98	98	98		-11.92	103	92	93	90		-10.77	95	110	108	149
-11.22	102	105	92	102	100		-11.92	101	93	100		-12.89	98	94	96	89		-11.44	89	101	92	109
-11.89	104	109	101	89	107		-12.89	107	87	105		Vehicle	100	100	100	100		-12.23	101	108	75	106
Vehicle	100	100	100	100	100		Vehicle	100	100	100								Vehicle	100	100	100	100
D1							D2						δOR						ETA
Log [Dopamine], M	Mix Gz/G15/16						Log [Dopamine], M	Mix Gz/G15/16					Log [SNC-80], M	Mix Gz/G15/16					Log [Endothelin-1], M	Mix Gz/G15/16
-4.22	352	428	251	318	248		-4.22	255	216	253	249		-4.82	213	196	183	196		-7.22	553	570	428	472
-4.97	305	384	245	301	246		-4.97	242	201	217	223		-5.57	231	206	190	181		-7.69	531	542	425	523
-5.73	273	330	211	281	235		-5.73	237	208	230	241		-6.33	232	202	193	185		-8.15	526	545	457	471
-6.47	219	252	169	213	190		-6.47	230	194	220	244		-7.07	231	187	168	173		-8.62	532	527	437	442
-7.22	160	183	124	138	128		-7.22	216	188	205	219		-7.82	224	181	167	173		-9.1	464	506	387	411
-8.22	120	125	106	110	102		-8.22	187	153	151	165		-8.82	219	165	127	160		-9.55	468	474	340	372
-9.16	126	121	103	114	96		-9.16	111	127	119	123		-9.76	197	166	115	165		-10.02	398	434	338	344
-10.1	115	117	111	105	98		-10.1	79	103	96	106		-10.7	131	132	106	122		-10.49	337	343	287	261
-11.02	111	112	104	109	99		-11.02	69	100	94	105		-11.62	101	102	84	110		-10.92	230	220	206	226
-11.92	111	109	111	115	111		-11.92	78	96	87	111		-12.52	87	106	88	114		-11.4	160	161	153	154
-12.89	106	111	105	104	94		-12.89	69	96	92	103		-13.49	85	96	76	112		-11.89	118	116	120	137
Vehicle	100	100	100	100	100		Vehicle	100	100	100	100		Vehicle	100	100	100	100		Vehicle	100	100	100	100
H1					H2					κOR					M1
Log [Histamine], M	Mix Gz/G15/16				Log [Histamine], M	Mix Gz/G15/16				Log [Dynorphin A], M	Mix Gz/G15/16				Log [Acetylcholine], M	Mix Gz/G15/16
-4.22	371	471	311		-4.22	223	241	254		-5.22	160	129	126		-4.22	291	377	334
-4.88	357	491	325		-4.88	226	230	227		-5.97	155	128	136		-4.88	303	363	333
-5.54	411	522	372		-5.54	208	206	211		-6.73	151	130	133		-5.54	275	325	300
-6.19	372	462	355		-6.19	172	185	180		-7.47	147	127	139		-6.19	225	259	242
-6.86	301	420	294		-6.86	143	137	142		-8.22	152	118	130		-6.86	156	187	171.5
-7.52	210	285	214		-7.52	107	114	116		-9.22	141	119	124		-7.52	110	130	120
-8.1	141	183	152		-8.1	94	105	121		-10.16	130	120	115		-8.14	88	103	95.5
-8.8	106	133	105		-8.8	88	117	127		-11.1	116	117	104		-8.84	105	100	102.5
-9.49	103	117	100		-9.49	87	102	126		-12.02	93	99	100		-9.52	94	101	97.5
-10.22	99	106	94		-10.22	88	106	120		-12.92	93	93	95		-10.22	95	105	100
-10.89	102	93	96		-10.89	87	96	116		-13.89	94	93	97		-10.89	99	101	100
Vehicle	100	100	100		Vehicle	100	100	100		Vehicle	100	100	100		Vehicle	100	100	100
M2							M3						μOR					V1A
Log [Acetylcholine], M	Mix Gz/G15/16						Log [Acetylcholine], M	Mix Gz/G15/16					Log [DAMGO], M	Mix Gz/G15/16				Log [AVP], M	Mix Gz/G15/16
-4.22	479	545	420	462	398		-4.22	288	233	302	265		-5.22	162	176	159		-5.22	258	292	212	246	199
-4.88	460	540	388	507	402		-4.88	275	251	236	273		-5.97	155	173	153		-5.88	258	292	230	206	181
-5.54	455	543	404	460	409		-5.54	223	220	244	251		-6.73	155	182	161		-6.54	257	289	233	252	188
-6.19	425	525	407	466	455		-6.19	197	201	220	218		-7.47	146	173	160		-7.19	231	281	224	236	187
-6.86	412	517	409	522	427		-6.86	158	158	173	173		-8.22	149	174	150		-7.86	191	214	174	187	182
-7.52	349	424	364	482	364		-7.52	113	116	132	152		-9.22	141	162	148		-8.52	131	163	137	139	116
-8.14	223	294	295	376	331		-8.14	93	97	104	101		-10.16	149	137	113		-9.1	108	126	110	101	103
-8.84	125	157	183	229	206		-8.84	89	90	114	92		-11.1	147	109	103		-9.8	107	116	115	110	110
-9.52	87	106	128	139	130		-9.52	91	107	102	101		-12.02	140	101	97		-10.49	102	107	96	107	107
-10.22	88	108	115	116	115		-10.22	88	86	107	97		-12.92	139	97	102		-11.22	98	108	103	96	111
-10.89	88	128	113	108	104		-10.89	88	125	98	100		-13.89	126	94	90		-11.89	104	98	96	99	116
Vehicle	100	100	100	100	100		Vehicle	100	100	100	100		Vehicle	100	100	100		Vehicle	100	100	100	100	100
