# Supplementary material for: Effector membrane translocation biosensors reveal G protein and βarrestin coupling profiles of 100 therapeutically relevant GPCRs
Source: eLife. 2022 Mar 18;11:e74101. doi: 10.7554/eLife.74101 (PMC9005190; doi:10.7554/eLife.74101)
Supplement: Figure 6—figure supplement 2—source data 1. [file elife-74101-fig6-figsupp2-data1.xlsx]

## Sheet: Figure 6- figure supplement 2
Source data for Figure 6- figure supplement 2
Figure supplement 2A
D2: Rap1GAP-RlucII/rGFP-CAAX+ Gαi2							α2AAR: Rap1GAP-RlucII/rGFP-CAAX+ Gαi2
Log cpd (M)	Dopamine			Dopamine + Eticlopride (1 µM)			Log cpd (M)	Dopamine			Dopamine + Eticlopride (1 µM)
-12.5	0	-1	1	-1	0		-12.5	0	-1	1	-1	0
-11.8861	0	-1	0	-2	-1		-11.8861	0	-1	0	-2	-1
-11.699	-2	0	0	-1	1		-11.699	-2	0	0	-1	1
-11.2218	0	0	0	-2	0		-11.2218	0	0	0	-2	0
-10.7959	1	-1	0	-1	1		-10.7959	1	-1	0	-1	1
-10.4437	0	-1	1	-2	0		-10.4437	0	-1	1	-2	0
-10.0969	1	3	2	0	0		-10.0969	1	3	2	0	0
-9.73519	3	2	3	-1	0		-9.73519	3	2	3	-1	0
-9.35657	6	3	6	-2	1		-9.35657	6	3	6	-2	1
-9.01777	14	11	13	-1	1		-9.01777	14	11	13	-1	1
-8.65767	33	27	29	-1	1		-8.65767	33	27	29	-1	1
-8.30125	53	50	50	-1	1		-8.30125	53	50	50	-1	1
-8	79	82	72	-2	1		-8	79	82	72	-2	1
-7.61979	87	92	76	-2	-1		-7.61979	87	92	76	-2	-1
-7.25181	98	101	82	0	0		-7.25181	98	101	82	0	0
-6.86647	99	103	84	-2	0		-6.86647	99	103	84	-2	0
-6.48947	100	109	89	0	0		-6.48947	100	109	89	0	0
-6.11922	100	102	90	-1	1		-6.11922	100	102	90	-1	1
-5.73526	99	105	96	-1	-1		-5.73526	99	105	96	-1	-1
-5.35674	102	103	92	-2	0		-5.35674	102	103	92	-2	0
-4.97679	102	104	95	1	2		-4.97679	102	104	95	1	2
-4.59969	101	101	92	1	2		-4.59969	101	101	92	1	2
-4.22186	100	100	100	3	7		-4.22186	100	100	100	3	7
Figure supplement 2B
D2: Rap1GAP-RlucII/rGFP-CAAX+ GαoB								α2AAR: Rap1GAP-RlucII/rGFP-CAAX+ GαoB
Log cpd (M)	Dopamine				Dopamine + Eticlopride (1 µM)			Log cpd (M)	Dopamine				Dopamine+ Eticlopride (1µM)
-12.5	1	0	0	0	-5	-3		-12.5	-1	0	0	-1	-2	0	0	-2
-11.8861	-1	0	-1	1	-4	-3		-11.8861	-1	0	0	-1	-2	-2	0	-2
-11.699	-1	0	2	-1	-4	-2		-11.699	0	-1	-1	-1	-2	-1	-1	-1
-11.2218	0	1	-1	1	-4	-2		-11.2218	-1	-1	-1	-1	-1	-2	-1	-2
-10.7959	0	0	1	3	-4	-3		-10.7959	0	-1	0	0	-1	-2	-1	-1
-10.4437	4	4	5	5	-4	-1		-10.4437	0	0	0	-1	-1	-1	-1	-1
-10.0969	8	9	12	13	-4	-2		-10.0969	0	0	0	-1	-1	-1	-1	-1
-9.73519	17	16	22	29	-4	-1		-9.73519	0	-1	0	0	-1	-1	-1	-1
-9.35657	31	33	40	43	-4	-2		-9.35657	1	0	0	0	0	-1	-1	-1
-9.01777	53	54	64	65	-5	-2		-9.01777	1	1	-1	0	1	-2	-1	0
-8.65767	71	74	78	83	-4	-1		-8.65767	1	1	0	1	-1	-1	-1	0
-8.30125	92	86	94	90	-5	-2		-8.30125	3	2	2	2	1	-1	-1	-1
-8	90	98	106	94	-4	-3		-8	5	6	6	4	0	0	1	1
-7.61979	94	103	99	94	-5	-3		-7.61979	12	14	14	13	2	1	4	4
-7.25181	94	106	100	97	-4	-2		-7.25181	30	31	34	31	7	7	10	13
-6.86647	96	107	99	97	-3	-3		-6.86647	57	60	60	74	18	18	26	31
-6.48947	96	104	101	101	-4	-1		-6.48947	85	89	83	98	42	43	52	65
-6.11922	94	101	99	97	-4	-1		-6.11922	94	98	86	106	68	68	72	88
-5.73526	97	102	103	100	-2	0		-5.73526	100	101	85	104	91	93	81	102
-5.35674	95	102	102	101	1	1		-5.35674	101	104	84	103	97	102	84	101
-4.97679	93	99	101	100	5	6		-4.97679	102	102	82	99	99	103	84	102
-4.59969	97	102	102	97	20	19		-4.59969	103	103	84	100	102	102	85	103
-4.22186	100	100	100	100	39	39		-4.22186	100	100	100	100	100	99	99	101
