# Supplementary material for: Effector membrane translocation biosensors reveal G protein and βarrestin coupling profiles of 100 therapeutically relevant GPCRs
Source: eLife. 2022 Mar 18;11:e74101. doi: 10.7554/eLife.74101 (PMC9005190; doi:10.7554/eLife.74101)
Supplement: Figure 6—source data 1. [file elife-74101-fig6-data1.xlsx]

## Sheet: Figure 6
Source data for Figure 6
Figure 6B; D2 receptor: Gi2+ Rap1GAP-RlucII/rGFP-CAAX
Log cpd (M)	Noradrenaline				Eticlopride+Nora (EC80)				Dopamine				Eticlopride+Dopa (EC80)				Serotonin				Eticlopride+Sero (EC80)				Eticlopride
-4.22186	113.024	106.395	102.405		-6.87646	-1.16347	-7.19245	-5.73807	108.371	107.862	97.8002	110.744	-3.19001	-2.76322	-6.78008	-7.66552	23.9327	19.2455	14.5002	29.1837	-6.21767	-2.6905	-7.86256	-3.8771	-4.32538	1.58762	-5.62886	-4.10497
-4.88264	109.828	106.262	95.9359	104.496	1.15522	8.76225	-0.955268	2.5034	95.6432	101.342	100.721	101.952	4.22492	8.84709	-1.49651	1.85775	16.3495	13.4767	9.87819	21.5594	4.49125	3.36916	-1.76284	2.10462	3.81844	7.34429	-2.83673	0.585452
-5.54073	102.147	100.59	98.307	97.024	6.22934	12.0951	3.67537	4.93406	98.04	98.3482	98.5304	96.6632	8.23376	9.34398	1.02929	2.65531	6.93019	5.80514	3.71833	10.2511	8.50008	10.2166	0.951971	4.12701	8.42999	11.9375	1.10661	5.9595
-6.19385	90.6531	90.8585	87.3705	91.6689	7.43479	14.6159	2.72175	4.6872	93.6948	87.0167	102.336	90.5296	5.93499	13.7069	0.840285	3.16803	0.398311	1.40583	-0.834991	6.55767	7.89735	9.33186	1.78531	8.29522	11.1773	14.3735	2.47261	4.06054
-6.86013	69.2633	72.6553	65.4974	86.6272	9.57938	13.21	3.12554	7.51664	99.1894	93.0157	96.2623	87.5007	10.7428	13.8766	4.02761	5.92152	-2.25088	1.01801	-1.13568	2.60784	6.41156	12.9919	0.745783	3.88014	9.45323	13.7554	3.87297	6.6811
-7.52288	30.7029	30.5649	23.5983	37.6436	8.19171	16.967	5.89189	6.12091	84.1913	85.7562	89.2777	84.3674	7.603	11.1376	2.6702	4.51629	-2.04063	0.836221	0.110036	1.47796	7.64505	9.74392	3.02244	4.87709	10.7848	11.5376	2.43824	7.10837
-8.1427	3.93057	6.32627	4.3283	9.01682	7.92539	14.5674	5.43656	5.35183	55.8632	54.5975	57.2928	65.7576		13.3918	1.51899	4.01307	-0.526804	0.484761	-0.199245	0.860801	9.07477	13.1131	2.53274	3.43389	10.8269	14.3493	2.91076	5.84556
-8.83565	-1.55004	-1.3089	1.46744	1.76281	10.8269	17.8275	6.96579	9.16874	23.5542	28.7955	21.7426	33.2475	11.4016	15.2097	5.29051	10.8113	-1.62012	0.448403	-0.792036	0.158187	12.5089	14.2402	4.77504	6.29182	6.41156	10.9074	1.74236	4.99103
-9.52288	-0.86321	-1.67248	-0.0875602	2.38946	23.5823	62.3781	61.2448	57.4497	4.33706	8.44715	3.6496	9.09278	75.4168	87.0288	70.0335	72.3755	-2.22285	0.472641	-1.16146	1.53493	21.1433	23.875	10.2992	17.2583	5.99105	12.495	2.2836	4.93406
-10.2218	-0.624922	1.12708	-1.07554	-0.164636	29.9459	76.0123	76.5456	63.2795	0.202075	2.62988	0.788738	4.36438	82.0327	99.4147	80.1969	85.0985	-1.84439	1.69669	-0.89513	1.21211	23.358	25.705	14.3542	23.2685	6.27139	12.4344	3.23722	4.74417
-10.8861	-1.74627	0.31509	-0.207837	2.30401	36.5619	88.5316	76.5456	65.6817	3.55211	1.40583	-0.723306	2.79774	67.4972	106.165	82.8945	82.1077	1.29539	-0.0242505	-1.05836	2.33249	24.0869	24.6264	14.7752	24.7402	8.8505	12.6647	3.28877	4.78215
Vehicle	0.258142	1.6361	0.324816	3.29147	37.6412	89.2224	81.3051	68.2928	-1.59209	0.654431	0.788738	1.97169	94.5919	98.7482	85.91	80.2087	-0.45672	1.36947	-0.903721	0.24364	27.8294	25.9111	18.9161	23.9711	8.61221	11.1498	4.56026	4.77265
Figure 6B; D2 receptor: GoB+ Rap1GAP-RlucII/rGFP-CAAX
Log cpd (M)	Noradrenaline				Eticlopride+Nora (EC80)				Dopamine				Eticlopride+Dopa (EC80)				Serotonin				Eticlopride+Sero (EC80)				Eticlopride
-4.22186	115.966	99.9722	105.286	108.826	-6.51306	-4.81274	-6.22546	-2.76678	105.885	104.422	99.6604	104.427	-5.75283	-3.85557	-5.71731	-3.35077	81.194	89.8967	78.7899	97.6396	-2.89372	-2.96557	-6.27991	-3.33779	-4.46375	-1.25274	-4.74638	-2.09196
-4.88264	110.711	120.123	106.13	101.221	-2.05086	0.560846	-1.15303	2.64481	102.844	99.7707	99.0888	106.166	-1.93517	1.53481	-2.03322	1.28218	73.2116	80.4425	74.2438	84.9866	-0.778305	1.03103	-3.5486	3.3975	0.0810819	-0.597834	-2.496	0.607351
-5.54073	107.653	110.518	102.564	102.182	2.57661	8.55405	-0.608582	5.11052	102.745	95.9252	102.065	98.016	1.96512	5.21236	-1.06229	6.03192	57.032	50.2329	56.9576	70.6985	2.72535	6.30387	-0.572285	3.9166	2.0147	6.38783	-1.70655	4.61738
-6.19385	105.207	86.555	104.951	98.6259	2.70882	8.90669	1.16087	5.04563	93.6551	97.3525	102.537	96.6403	4.67549	5.3299	-0.281913	5.98001	28.2425	31.1735	22.73	38.3847	2.54356	6.27028	-0.835435	4.17614	3.45252	8.92349	-0.590434	5.72046
-6.86013	102.86	104.237	97.9635	99.4564	4.19622	9.71273	1.44217	8.26403	95.159	102.978	99.9508	94.8235	3.02283	7.27783	-0.499692	6.3304	9.56739	8.68839	2.72162	10.5221	0.428142	7.66405	-1.15303	5.99299	3.55168	9.67915	-0.272839	5.2922
-7.52288	77.7234	78.4274	94.9963	94.2395	6.62564	10.1997	2.68532	7.66707	94.4979	104.641	98.2993	100.092	3.30378	7.22745	0.60735	5.409	4.46065	-0.0772674	0.0356806	6.71972	5.17129	7.96632	-0.399877	6.3304	2.47745	7.63047	1.14272	5.48686
-8.1427	37.1173	44.5907	47.0759	61.1341	5.43572	10.4684	2.51292	8.4587	93.8534	88.5869	95.3593	97.38	1.58501	6.55575	-0.717471	5.87619	2.49397	0.711978	0.0991994	4.59142	3.53516	8.33575	-0.091357	7.36859	4.34496	9.98141	0.14457	5.31816
-8.83565	17.2358	14.8512	15.0896	43.4069	6.75786	16.0939	2.85773	9.65262	75.5914	85.9505	86.9022	83.585	2.7584	7.89915	2.9031	8.26403	3.78306	-2.27708	-0.898953	5.68153	4.06401	10.1829	1.16995	9.56178	4.08054	7.47934	1.05198	6.56399
-9.52288	6.39427	1.87066	3.62903	9.78239	67.7908	23.1299	61.6126	84.3767	45.1493	46.8744	54.3261	67.2335	68.1875	40.3086	62.3204	73.268	2.89061	0.409714	-0.93525	6.01894	32.2255	44.7922	38.9273	61.5883		7.83198	-0.0187641	6.77163
-10.2218	2.98977	-0.480286	2.4131	7.92662	78.0208	80.241	85.4231	79.7437	16.1946	12.8361	13.8465	26.9386	85.1108	77.1009	84.4431	83.1827	1.9486	2.52556	-0.826361	7.12202	55.8586	80.2074	60.3513	74.4619	6.04721	9.54481	1.84143	7.77089
-10.8861	13.3189	0.409714	0.888648	6.3304	90.6307	96.3786	89.7424	90.0219	5.88194	2.45839	4.07366	8.61443	86.2015	90.6188		85.7133	2.0147	15.271	-1.25284	7.05713	59.5275	81.1142	62.393	74.41	4.87381	10.0654	0.806981	7.75792
Vehicle	4.4276	0.594431	1.89587	8.65336	93.0271	103.969	86.63	86.7775	1.86596	1.23254	0.643646	3.87766	87.6394	90.6356	87.5737	84.4545	1.05615	-1.5718	-1.4434	4.85097	56.5031	81.3829	63.0917	80.159	8.27831	8.43651	2.95755	10.5221
Figure 6B; D2 receptor: GRK2+ barr2-RlucII/rGFP-CAAX
Log cpd (M)	Noradrenaline				Eticlopride+Nora (EC80)				Dopamine				Eticlopride+Dopa (EC80)				Serotonin				Eticlopride+Sero (EC80)				Eticlopride
-4.22186	98.5035	124.477	101.343	102.783	-6.48493	2.42159	-3.72788	-1.65207	104.736	105.56	100.942	107.032	-6.91477	6.95657	-5.1727	-9.29934	12.7504	5.92	9.11502	22.8346	-2.50891	0.478029	-3.08573	-7.59995	-1.97161	5.92	-4.69109	-7.67719
-4.88264	101.083	107.633	97.731	93.9774	3.93869	18.4884	2.6133	0.356302	91.4112	93.8985	99.0153	95.2906	-2.40145	7.73399	-1.88171	-2.27003	7.37741	5.66086	5.9043	10.2437	-1.32685	10.8437	0.205261	-4.4329	1.68203	7.21571	-0.757956	-3.5832
-5.54073	83.889	72.3898	83.2827	80.3823	1.89695	17.3222	-0.0355435	3.44611	100.223	100.507	95.0821	92.2008	0.392511	10.1958	0.686869	0.0473211	4.04615	5.53129	3.49625	2.90539	1.25219	11.362	0.927674	-1.72932	5.98043	8.64098	2.1317	-1.03411
-6.19385	60.7851	57.4891	61.1287	64.3153	5.65805	18.8771	3.65679	1.74671	88.1874	93.2506	97.8915	86.2529	-1.97161	12.9168	4.21866	-0.261659	2.43425	3.97644	-0.677688	1.51498	2.00441	16.5448	3.09491	-1.03411	7.26995	20.5615	3.73706	3.21437
-6.86013	36.6065	35.8508	36.8075	44.2315	7.69979	16.6744	4.05813	5.53173	76.7966	82.1076	86.1724	78.1422	3.18647	11.2324	2.93438	2.90539	-1.21939	2.03288	-4.12922	-3.66045	-0.57463	10.5845	3.49625	3.29162	5.65805	16.8039	4.05813	4.37305
-7.52288	15.4369	17.0631	18.8275	17.1957	7.37741	21.3389	1.73036	5.1455	60.4627	62.9311	61.209	63.3111	4.36853	17.1927	2.6133	1.12875	-0.78955	2.16245	-3.00546	-4.66463	6.51773	11.7507	1.00794	-1.34309	3.07901	12.0098	-0.436884	0.201811
-8.1427	5.55059	4.88343	4.94108	5.68622	7.05503	10.7141	4.29893	3.90958	34.0275	24.1895	29.6637	34.6531	2.75663	9.80712	1.48955	-2.81075	-1.64923	-0.688107	-3.4068	-4.51014	5.22821	4.88343	1.97116	-0.338905	6.30281	18.6179	3.57652	2.0557
-8.83565	3.72377	-3.7978	2.05143	3.13713	10.9236	22.6346	15.7773	13.179	14.8996	13.4351	17.0616	18.4317	5.55059	16.2857	7.99127	12.561	1.25219	-3.40909	-3.166	-3.73769	2.11187	7.86356	4.29893	1.28324	2.64917	14.8604	3.41598	3.36886
-9.52288	0.499971	-0.947249	1.24875	0.356302	53.5852	72.5193	60.3261	63.3111	6.94757	3.19901	2.05143	5.68622	48.4271	57.6187	56.3126	60.144	-1.75669	-1.20639	-3.166	-2.42452	5.22821	17.1927	8.95448	8.46704	5.01329	9.28884	2.77384	0.819773
-10.2218	3.40139	-2.76124	4.70027	1.206	79.8055	98.0448	84.0854	80.923	1.68203	-2.63167	-2.36332	2.21019	80.2353	102.061	76.2994	83.3948	-1.21939	0.478029	-1.72117	0.665282	13.5026	22.6346	12.9679	9.16225	5.76551	12.7873	5.18188	0.819773
-10.8861	5.76551	-1.20639	2.69357	0.510792	79.2682	105.171	86.0118		1.35965	-0.688107	-0.276348	2.90539	87.9724	102.061	81.4366	90.7331	3.61631	-0.947249	0.446065	0.588037	11.9982	21.3389	11.0414	14.1059	-0.35971	7.60442	3.73706	0.665282
Vehicle	6.19535	4.88343	4.45947	5.60897	81.5249	116.055	95.644	86.0212	1.03727	2.42159	2.05143	1.90121	92.8081	90.2705	84.1657	87.2571	-2.07907	-2.89081	3.89759	2.13294	15.222	14.4717	14.0916	15.5736	5.87297	16.8039	7.02805	4.06407
Figure 6B; α2AAR receptor: Gi2+ Rap1GAP-RlucII/rGFP-CAAX
Log cpd (M)	Noradrenaline		WB4101+Nora (EC80)		Dopamine		WB4101+Dopa (EC80)		Serotonin		WB4101+Sero (EC80)		WB4101 drc
-4.22186	106.073	105.903	2.10269	5.71807	96.7564	105.264	3.79766	6.22157	5.2522	15.1127	3.78564	5.16545	3.79766	6.03736
-4.88264	101.865	98.4117	4.30254	7.06893	93.6911	96.2994	6.71877	10.1145	0.215384	8.06366	6.27399	8.1005	6.6226	8.67768
-5.54073	95.5062	102.464	5.15604	12.1654	69.9375	96.0538	8.70224	11.404	0.551973	12.5461	6.57452	12.4847	7.16355	11.5022
-6.19385	95.4221	97.945	9.26723	13.7495	29.5708	66.2121	21.0358	13.9092	0.756331	5.93912	6.03357	11.1706	6.70675	14.8425
-6.86013	94.8691	91.7433	23.9329	30.1195	21.721	26.681	51.5212	30.7336	-0.505879	9.56188	5.37241	13.6513	5.80517	13.3811
-7.52288	93.5829	93.4626	47.8187	67.305	6.12974	7.59699	74.8421	57.9104	0.0591103	8.05138	6.44229	12.6934	5.51667	9.97942
-8.1427	59.8518	70.6576	72.8466	91.4732	0.0470893	1.65321	85.5528	86.8066	-0.998742	6.22157	6.58654	13.111	7.68046	13.639
-8.83565	24.6061	29.5669	71.945	95.0959	-0.421732	-0.0292293	89.3995	88.6978	0.527931	7.8426	8.25746	13.725	6.71877	13.6145
-9.52288	6.40622	5.54614	75.8398	98.8169	-0.133226	-1.14676	86.4904	95.3784	-0.349605	9.80749	7.28376	12.239	6.1658	11.5513
-10.2218	1.21313	1.18655	76.9217	97.552	-1.15502	-1.41693	90.0126	93.1679	-0.782363	7.83033	9.0749	11.9198	8.20938	12.1654
-10.8861	-1.38342	0.240943	74.9743	94.2609	0.0350682	1.22339	82.1028	89.1399	-0.505879	8.97242	6.87504	12.5583	8.02906	12.9759
Vehicle	0.299531	1.0269	73.9164	90.9697	-1.39544	0.044454	85.072	81.5628	-0.734279	6.44262	9.62786	13.0496	8.87054	14.118
Figure 6B; α2AAR receptor: GoB+ Rap1GAP-RlucII/rGFP-CAAX
Log cpd (M)	Noradrenaline		WB4101+Nora (EC80)		Dopamine		WB4101+Dopa (EC80)		Serotonin		WB4101+Sero (EC80)		WB4101 drc
-4.22186	101.662	107.746	-4.68718	1.96878	97.0526	95.5619	-4.95394	3.21669	17.3058	17.9316	-4.31668	1.89945	-3.07179	1.81279
-4.88264	102.729	110.26	-1.97511	5.64318	88.1012	91.6622	-2.18259	5.24454	2.94516	5.95515	-1.16	5.31387	-1.90101	3.78865
-5.54073	98.5642	101.593	1.99667	8.45097	87.464	97.1564	-0.582021	5.57385	-1.35266	0.876862	-0.00403789	6.31913	-1.14518	7.58437
-6.19385	96.5487	92.6328	0.499844	12.056	60.7582	92.4941	4.04184	9.05759	-1.32302	1.37949	0.233083	7.48037	-1.64907	8.24298
-6.86013	100.698	99.2363	10.2959	22.7499	58.2685	66.9467	18.5655	18.3476	-1.97511	0.651545	-0.53756	8.43364	5.15334	8.57229
-7.52288	98.5049	87.6585	31.4293	65.2654	19.4992	30.428	58.639	48.644	5.06442	1.29283	3.25638	11.7614	-0.55238	7.30705
-8.1427	94.4442	94.5739	64.1224	93.2047	1.77437	2.6274	72.6439	70.517	-0.52274	2.85272	6.79837	14.0492	1.13711	10.9815
-8.83565	68.5684	75.8727	68.0052	93.7247	-0.878422	0.287572	87.3751	81.9735	-1.85655	0.876862	8.75462	18.6422	7.22815	8.45097
-9.52288	22.3891	24.1885	73.2071	114.87	-1.17482	-1.35897	73.0441	84.5734	-0.38936	0.980854	9.52526	18.1049	5.16817	12.004
-10.2218	4.33824	6.33646	70.7025	103.5	-1.33784	1.69147	86.7526	83.3774	-2.92359	1.11951	11.5556	18.3996	7.05031	11.3974
-10.8861	-0.908062	0.148916	77.1048	103.275	-0.211519	1.06751	83.8034	81.1589	-1.78245	-1.84427	7.95434	14.9158	7.07995	8.98826
Vehicle	0.959266	-0.631027	70.8062	86.2026	-1.81209	-1.09899	92.1768	71.9903	-2.24187	0.322236	12.1336	13.8759	10.6516	11.5014
Figure 6B; α2AAR receptor: GRK2+ barr2-RlucII/rGFP-CAAX
Log cpd (M)	Noradrenaline		WB4101+Nora (EC80)		Dopamine		WB4101+Dopa (EC80)		Serotonin		WB4101+Sero (EC80)		WB4101 drc
-4.22186	98.1037	95.0437	-2.03148	3.11637	32.9826	42.6864	-2.46005	1.20488	-0.4672	0.501802	-1.90291	1.62233	-2.09576	2.39132
-4.88264	89.9395	98.1416	0.00422579	4.32478	13.697	26.3618	-1.92434	5.2256	-3.63861	-0.662669	-0.488629	2.28146	-1.38862	3.44594
-5.54073	82.1824	83.7505	4.24706	10.6964	2.89707	13.0254	0.36851	4.12704	-2.9529	-0.706612	-1.26005	4.7642	-0.210059	5.0718
-6.19385	60.3682	61.9771	15.7756	21.3524	-0.810056	3.18228	5.63991	6.93935	-0.938627	0.0404074	-2.28862	3.29214	-0.210059	3.18228
-6.86013	34.2041	38.8415	31.2255	40.8848	0.197082	0.809398	12.4113	14.036	-2.03148	-0.838439	-0.981483	4.56646	-1.81719	3.07243
-7.52288	18.7327	18.1227	56.9611	67.3161	-1.17434	0.6556	25.7398	25.7466	-2.54576	0.238148	-0.33863	5.42334	-0.702913	5.51122
-8.1427	5.8542	4.25887	70.911	86.1014	-2.33148	-0.640698	36.2183	33.9639	-2.13862	0.0404074	-1.08863	2.72089	0.64708	3.66565
-8.83565	0.947078	1.40262	77.5324	83.2232	-1.3672	-0.377045	40.054	38.6437	-2.33148	-0.574785	-1.00291	4.12704	0.304224	4.43464
-9.52288	0.861364	0.589686	77.9181	91.3305	-2.03148	-1.01421	38.9826	37.2595	-1.5172	0.260119	-2.18148	2.91863	0.389938	4.918
-10.2218	0.282796	0.106321	81.4752	91.704	-0.852913	-0.772525	42.6683	39.984	-1.08863	-0.333102	-0.960055	3.11637	-0.767199	4.2369
-10.8861	0.36851	0.238148	82.8681	92.6708	0.625651	-0.0914195	40.1397	37.633	-1.68862	-0.706612	-1.08863	2.21555	-0.33863	2.89666
Vehicle	1.16136	1.68824	84.8609	89.7926	-0.488629	-0.86041	44.0183	34.0737	-0.788627	-0.684641	0.689936	2.87469	1.84707	5.09377
Figure 6C: left; CB1 receptor: GoB+ Rap1GAP-RlucII/rGFP-CAAX
Log cpd (M)	WIN55,212-2					AM-630+WIN55,212-2 (EC80)					Acetylcholine					AM-630+Acetylcholine (EC80)
-4.22186	118.953	111.119	110.421	120.11	104.868	-1.46214	1.14246	1.99386	7.27475	20.5391	70.5512	76.4291	77.4094	54.7045	26.8325	-1.79302	2.58688	-0.438199	6.8662	11.9375
-4.88264	95.5286	102.34	97.5901	95.1603	93.1102	-2.86202	-0.342087	9.47381	9.06096	13.9597	57.9947		64.6006	59.6641	39.873	0.107427	1.10234	4.09084	6.66668	7.36055
-5.54073	93.0597	91.2585	93.2557	97.4121	78.1166	15.0904	12.2565	42.3985	34.505	35.4637	49.5615	45.6628	55.8776	55.398	41.619	13.3681	13.5565	22.4989	13.061	9.11638
-6.19385	90.4042	95.4714	95.3526	78.4193	72.5138	46.7108	49.8115	79.3767	69.0132	57.096	35.1893	26.7489	40.9393	35.3316	28.4404	29.0044	32.0772	44.8306	22.4671	11.0596
-6.86013	90.2345	87.1258	85.0947	84.6141	68.4497	68.7781	74.3908	93.2557	83.74	64.5533	14.2675	12.9787	18.4995	12.6524	13.9005	44.8188	48.6801	60.1472	44.8613	16.0115
-7.52288	69.5416	78.9728	69.2917	79.0464	64.1292	77.8307	81.8296	99.6547	83.8065	61.1008	1.12552	1.17456	14.8243	5.81157	7.43947	61.1763	58.0768	72.848	49.0608	20.0558
-8.1427	23.7443	31.7081	30.6706	35.0846	34.9902	85.1779	78.1704	103.135	85.2887	61.673	-2.08148	-0.895783	1.06428	3.58831	5.77241	59.0128	60.3317	74.6531	49.1178	22.7191
-8.83565	7.41227	12.7942	9.73323	13.593	16.1693	76.9568	83.4506	97.147	80.158	64.7111	-2.14087	-1.11245	14.7271	3.17026	6.23603	62.2113	60.1953	79.1389	52.3672	21.1409
-9.52288	1.66003	2.18566	2.92345	3.74032	9.39258	80.8425	81.6932	94.5203	86.0297	68.6272	-3.57469	-0.117399	-1.09756	2.03962	4.65776	57.3669	60.9336	77.9823	56.2627	21.7623
-10.2218	-0.851281	-0.510603	0.426535	2.38166	5.74282	76.1253	82.1506	102.811	80.8041	60.7655	-2.52266	-2.19577	0.145496	1.8401	4.32237	60.7775	65.2267	78.8146	53.0608	22.9164
-10.8861	-0.681598	0.0190192	1.0967	2.86622	5.89078	76.5835	85.3765	96.1309	80.6331	65.9639	-1.28397	0.38815	1.15075	3.03724	3.5431	60.7521	60.5645	78.1228	54.4764	23.7154
Vehicle	0.709801	-0.309989	-0.124733	-0.136143	5.94997	74.3182	82.9851	100.055	79.6165	69.9096	-2.31055	-0.799488	0.23197	-1.19077	4.58871	63.5518	62.2657	76.469	52.4147	25.9053
Figure 6C: central; CB1 receptor: GoB+ Rap1GAP-RlucII/rGFP-CAAX
Log cpd (M)	Atropine+WIN55,212-2 (EC80)					Atropine+Acetylcholine (EC80)
-4.22186	73.9619	80.5055	94.7906	96.2815	70.8664	5.82574	26.131	31.0705	5.80207	10.2409
-4.88264	79.519	80.1926	97.1145	83.5974	70.2647	5.5797	28.6427	34.9726	5.70706	7.72553
-5.54073	81.5806	78.3229	95.8391	86.8183	69.1402	6.56386	28.0168	31.2327	4.01586	7.48879
-6.19385	76.7447	82.2148	101.968	87.1129	70.5113	6.63173	27.9445	34.8213		5.53567
-6.86013	76.8889	86.5641	94.6717	86.2958	70.9651	7.92981	33.4334	45.3386	6.0396	7.36055
-7.52288	82.3612	81.0592	103.287	82.5333	68.8048	13.996	39.508	66.33	6.54316	6.97585
-8.1427	81.7758	80.5858	101.233	77.6592	67.1969	38.7442	63.9749	81.3656	15.3412	8.29765
-8.83565	81.3516	81.5407	100.206	85.5642	68.5681	54.5587	68.6532	86.0135	34.315	15.2322
-9.52288	78.9506	82.4635	100.282	78.4953	65.8357	65.6389	64.5366	81.0089	43.9682	17.9547
-10.2218	76.4053	81.8135	99.806	82.4193	68.1242	62.7374	64.4403	83.0626	56.7567	20.7562
-10.8861	78.0173	82.7444	95.1905	83.3789	64.0601	62.8052	63.2126	83.7112	53.1463	21.93
Vehicle	76.7956	80.7302	104.551	84.6616	62.689	61.5156	60.404	79.2902	50.8185	25.4811
Figure 6C: right; CB1 receptor: GoB+ Rap1GAP-RlucII/rGFP-CAAX and UBO
Log cpd (M)	UBO+WIN55,212-2			UBO+Acetylcholine
-4.22186	106.082	108.914	108.414	9.25417	1.50951	1.11913
-4.88264	96.2882	103.285	103.871	6.15504	-1.05675	0.935795
-5.54073	105.884	105.314	107.028	4.22801	-1.8127	-2.40506
-6.19385	106.897	102.549	107.925	4.824	-2.84716	-2.28284
-6.86013	101.871	104.001	106.254	5.43985	-1.57398	-0.10313
-7.52288	93.4274	87.5489	99.6337	4.96306	-1.69334	-2.62914
-8.1427	56.7941	60.0163	70.5438	4.62534	-3.18535	-1.12168
-8.83565	18.8893	19.8115	23.8329	3.57242	-3.30471	-2.14024
-9.52288	4.50614	1.72834	4.60259	3.79095	-2.48908	-1.22354
-10.2218	-0.202161	-1.15622	0.365405	3.73135	-1.77292	-1.42725
-10.8861	-2.20865	-2.40951	-1.1828	2.49965	-2.17079	-2.34395
Vehicle	1.06928	1.74823	2.42288	5.81731	-1.27558	0.854311
