# Supplementary material for: Effector membrane translocation biosensors reveal G protein and βarrestin coupling profiles of 100 therapeutically relevant GPCRs
Source: eLife. 2022 Mar 18;11:e74101. doi: 10.7554/eLife.74101 (PMC9005190; doi:10.7554/eLife.74101)
Supplement: Figure 7—source data 1. [file elife-74101-fig7-data1.xlsx]

## Sheet: Figure 7
Source data for Figure 7
Figure 7A; endogenous S1P1 receptor in iPSC-derived cardiomyocytes: Gi2+ Rap1GAP-RlucII/rGFP-CAAX
Log [Compound], M	S1P				Log [Compound], M	Fingolimod
-5	323	398	313		-7	317	422	369
-5.52143	313	394	296		-7.52143	267	413	314
-6.04431	289	348	298		-8.04431	293	399	344
-6.56703	295	290	214		-8.56703	297	364	336
-7.08831	218	165	140		-9.08831	295	354	288
-7.61083	146	122	98		-9.61083	214	206	227
-8.13253	117	103	79		-10.1325	141	165	137
-8.65561	109	96	80		-10.6556	107	132	99
-9.17718	104	95	83		-11.1772	91	143	88
Vehicle	174	98	78		Vehicle	96	102	83
Figure 7B; endogenous FPR2 receptor in promyelocytic HL-60 cells: Gi2+ Rap1GAP-RlucII/rGFP-CAAX
Log [Compound], M	Cmpd43				Log [Compound], M	ACT-389949
-4.00432	159.08	137.93	139.43		-7.52292	138.38	113.58	122.59
-4.50333	147.71	126.82	143.97		-8.12495	120.89	117.54	122.17
-5.00043	141.29	139.49	133.26		-8.52288	125.22	104.98	126.2
-5.4896	149.8	133	132.9		-9.01773	103.75	99.29	103.97
-6.00004	151.59	128.4	134.5		-9.52288	105.94	97.51	112.49
-6.60207	138.07	120.07	121.53		-10.2218	100.58	91.85	99.02
-7	124.58	111.33	118.42		Vehicle	100	100	100
-7.49485	110.96	104.93	114.95
-8	106.13	100.5	111.24
Vehicle	105.26	100.9	100.98
Figure 7C; endogenous FPR2 receptor in promyelocytic HL-60 cells: endogenous Gi/o+ Rap1GAP-RlucII/rGFP-CAAX
Log [Compound], M	Cmpd43				Log [Compound], M	ACT-389949
-4.00432	159.08	137.93	139.43		-7.52292	138.38	113.58	122.59
-4.50333	147.71	126.82	143.97		-8.12495	120.89	117.54	122.17
-5.00043	141.29	139.49	133.26		-8.52288	125.22	104.98	126.2
-5.4896	149.8	133	132.9		-9.01773	103.75	99.29	103.97
-6.00004	151.59	128.4	134.5		-9.52288	105.94	97.51	112.49
-6.60207	138.07	120.07	121.53		-10.2218	100.58	91.85	99.02
-7	124.58	111.33	118.42		Vehicle	100	100	100
-7.49485	110.96	104.93	114.95
-8	106.13	100.5	111.24
Vehicle	105.26	100.9	100.98
Figure 7D; endogenous PAR2 receptor in HEK239 cells: endogenous Gi/o+ Rap1GAP-RlucII/rGFP-CAAX
Log [SLIGKV-NH2], M	PAR2
Vehicle	102	97	95	100
-4	122	123	117	119
-4.478	123	136	132	132
-5	128	128	132	132
-5.478	116	122	122	122
-6	106	113	116	115
-6.478	110	110	106	105
-7	101	104	101	109
-7.478	103	106	99	98
-8	105	97	93	100
