# Supplementary material for: Effector membrane translocation biosensors reveal G protein and βarrestin coupling profiles of 100 therapeutically relevant GPCRs
Source: eLife journal article supplement (doi:10.7554/elife.74101), 2022-03-18

# Figure 3- figure supplement 1

## 1 Gα protein family

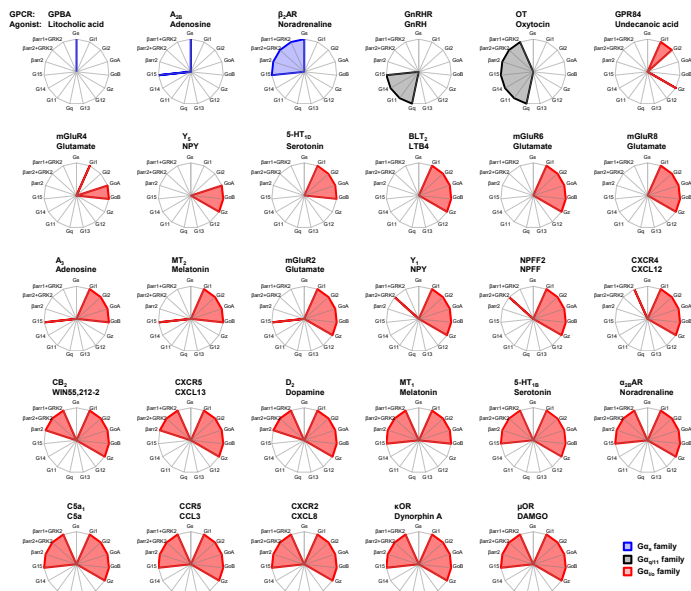

## 3 Gα protein families

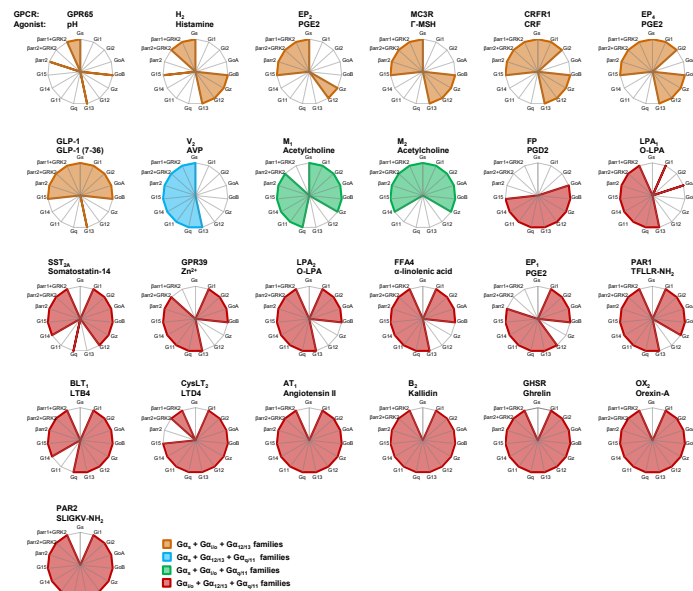

## 2 Gα protein families

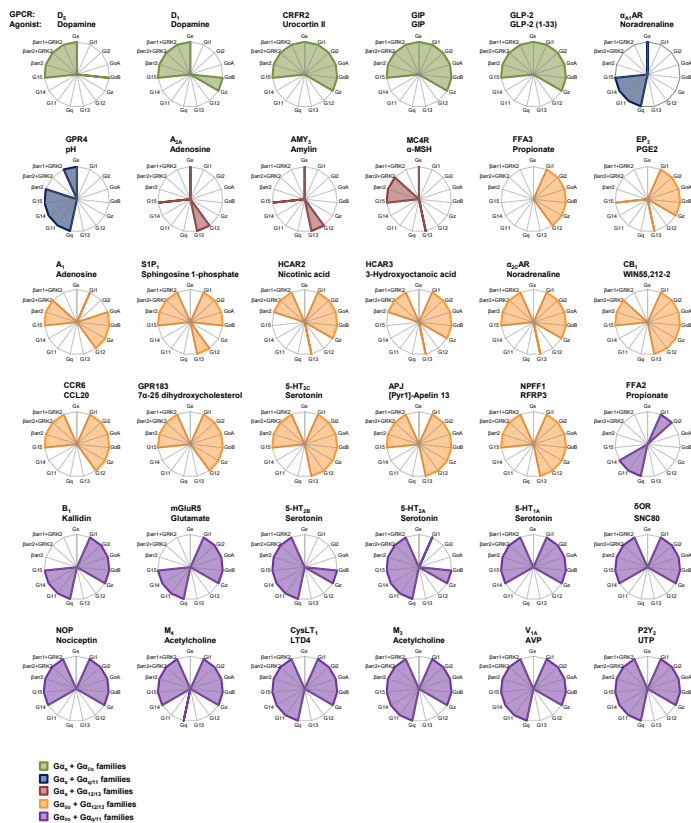

## 4 Gα protein families

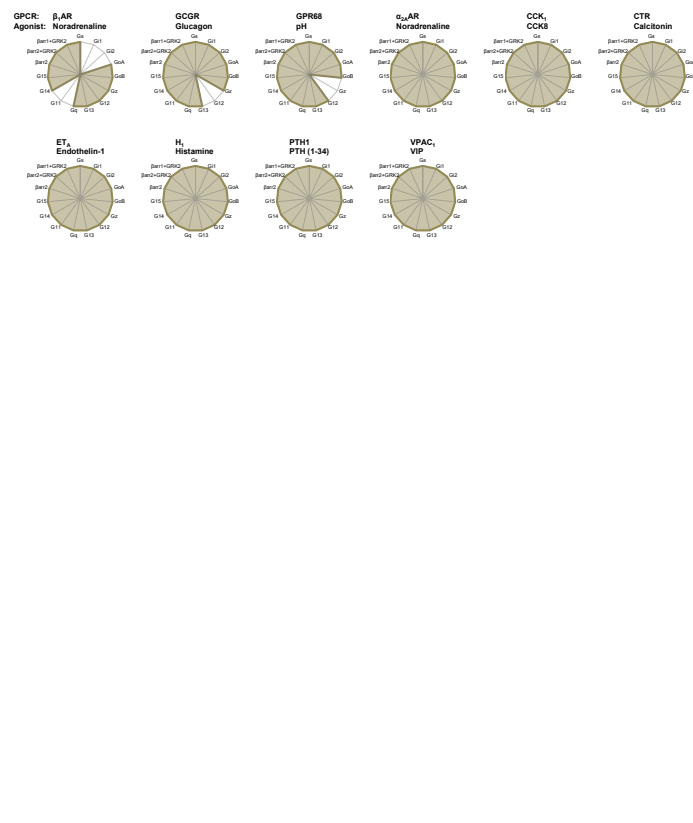

Supplement: supp [file elife_poa_e74101_Figure_3_figure_supplement_1.pdf › elife_poa_e74101_Figure_3_figure_supplement_1.pdf]
