# Supplementary figures and images for: Effector membrane translocation biosensors reveal G protein and βarrestin coupling profiles of 100 therapeutically relevant GPCRs
Source: eLife journal article supplement (doi:10.7554/elife.74101), 2022-03-18

Figure 2- figure supplement 6; Uncropped blots

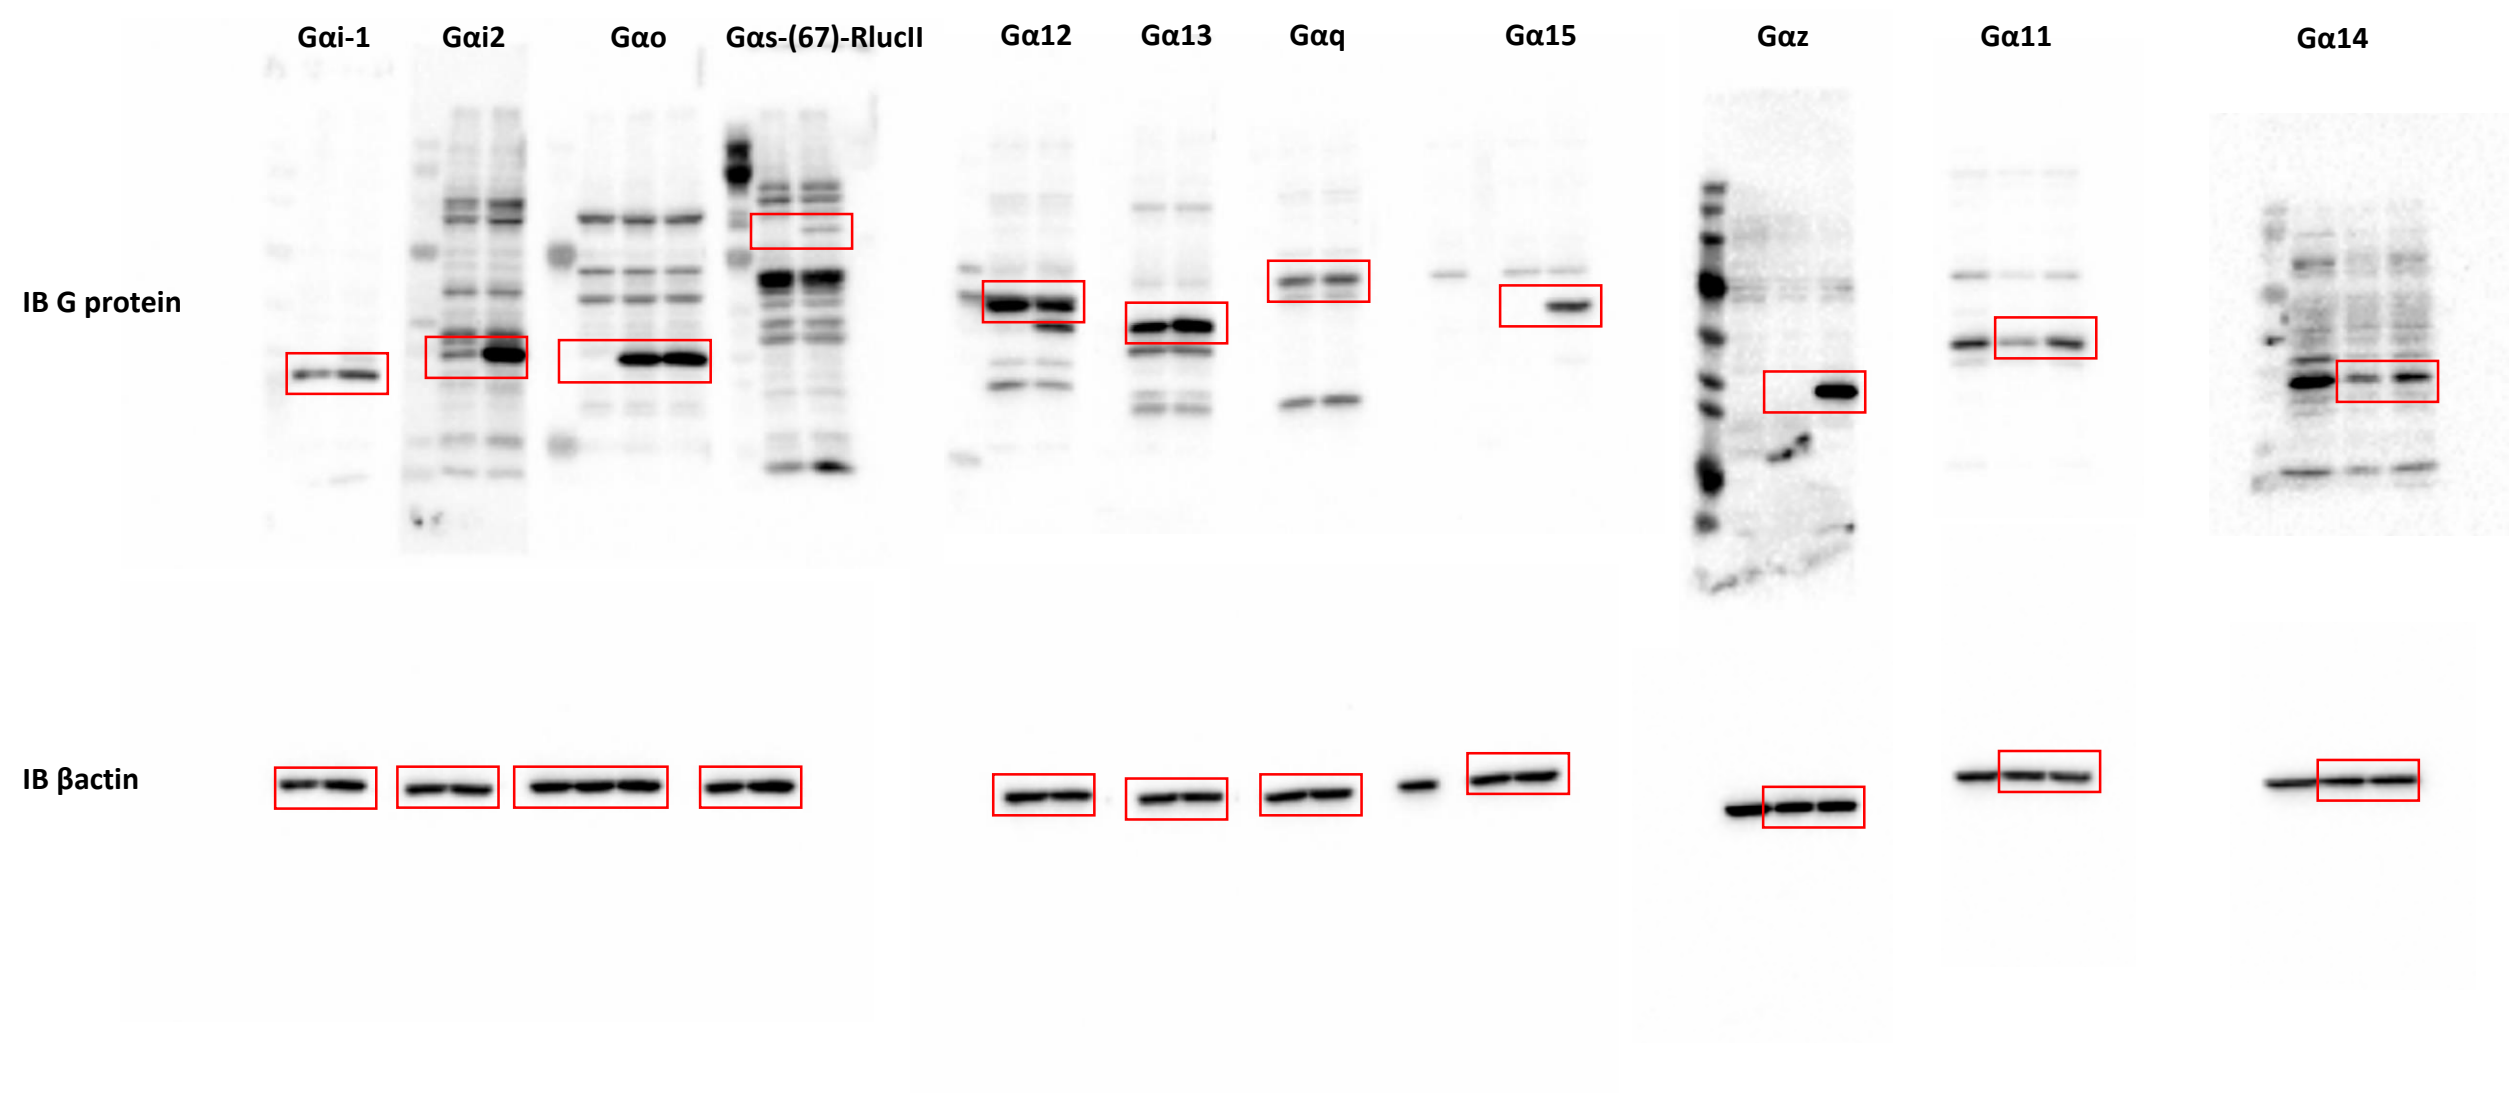

Supplement: fig2-figsupp6-data1 [file elife-74101-fig2-figsupp6-data1-v2.zip]

# Figure 2- figure supplement 1

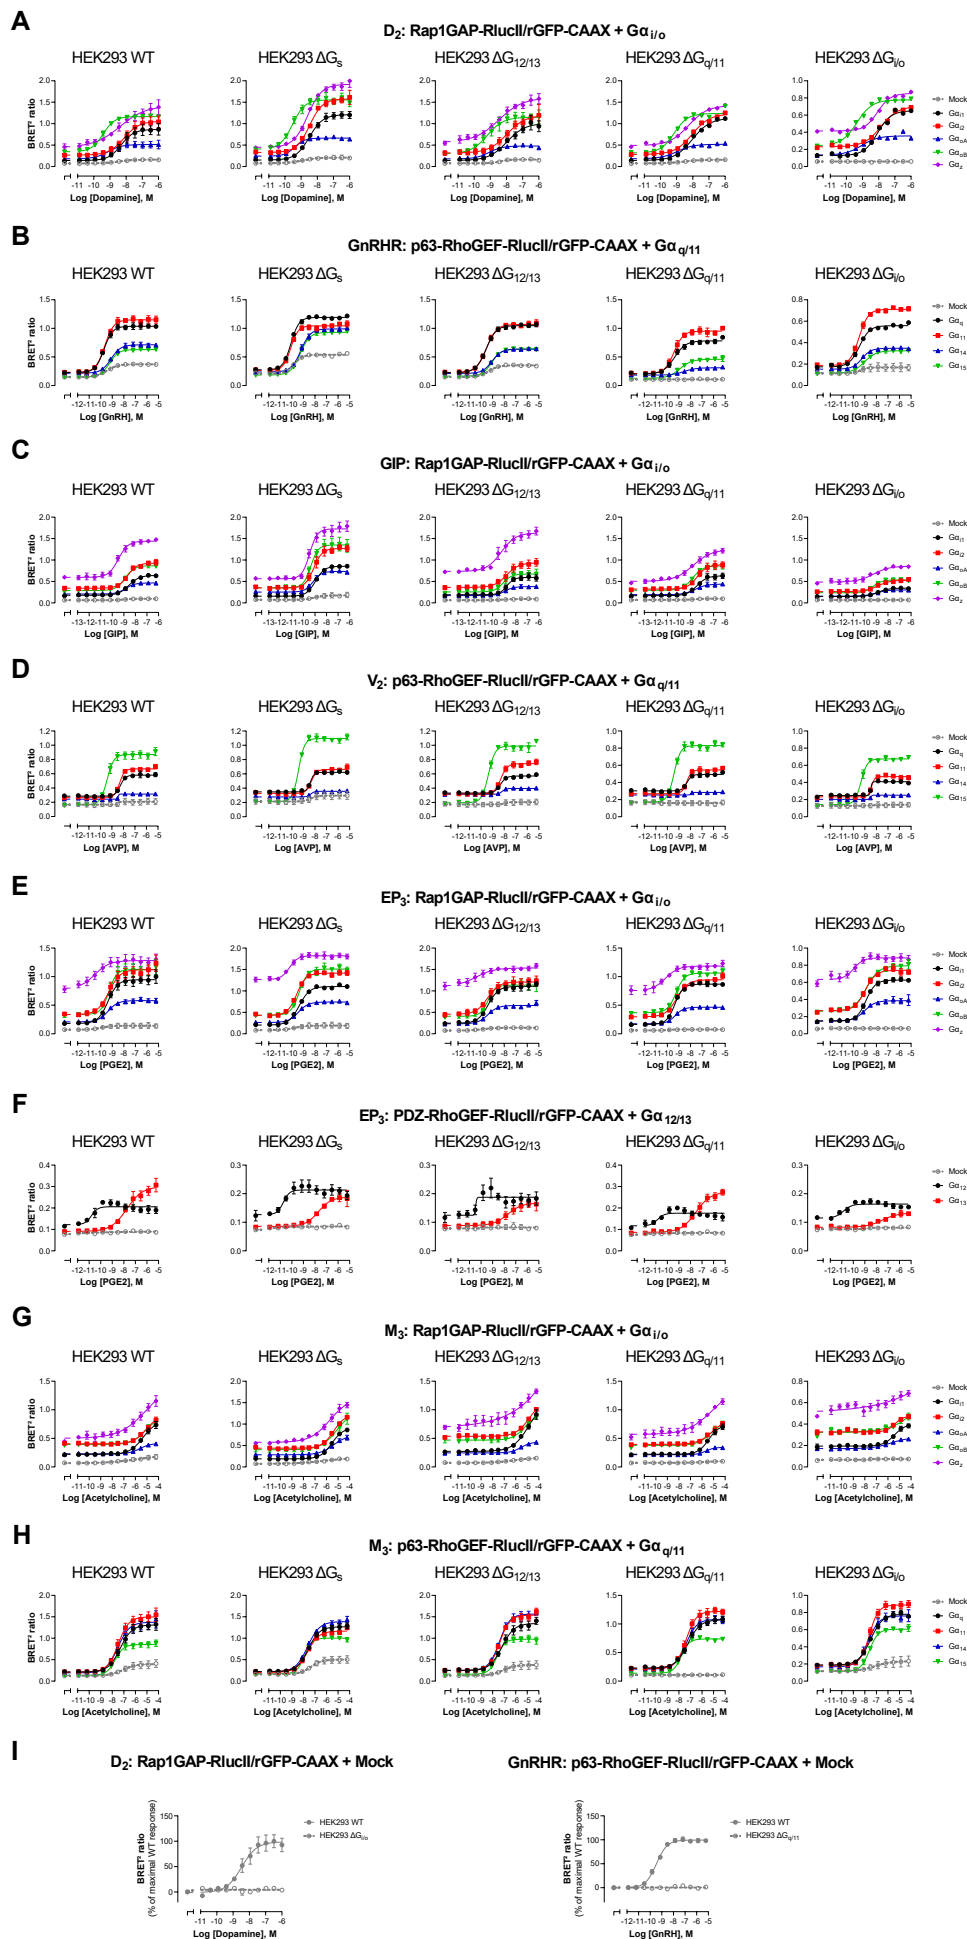

Supplement: supp [file elife_poa_e74101_Figure_2_figure_supplement_1.pdf › elife_poa_e74101_Figure_2_figure_supplement_1.pdf]

**A**

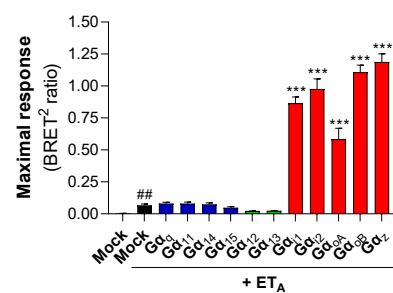

# B

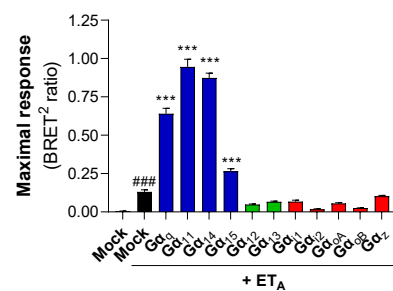

**C**

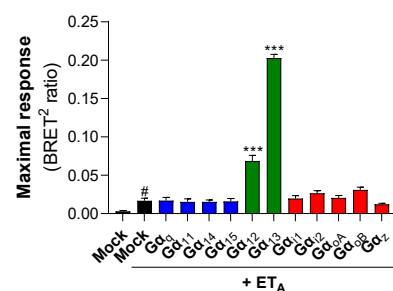

Supplement: supp [file elife_poa_e74101_Figure_2_figure_supplement_2.pdf › elife_poa_e74101_Figure_2_figure_supplement_2.pdf]

**Figure 2- figure supplement 3**

**A**

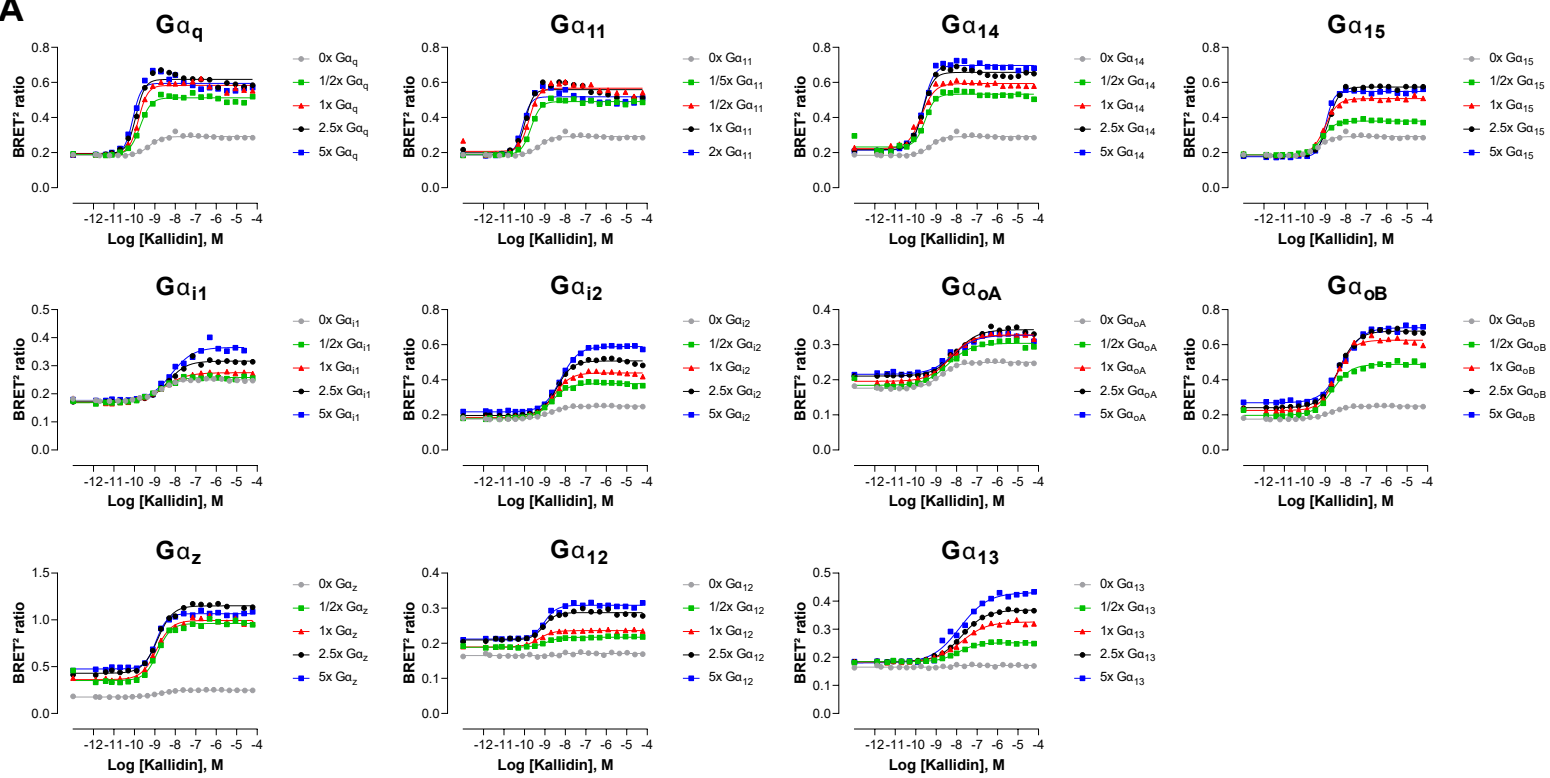

**B**

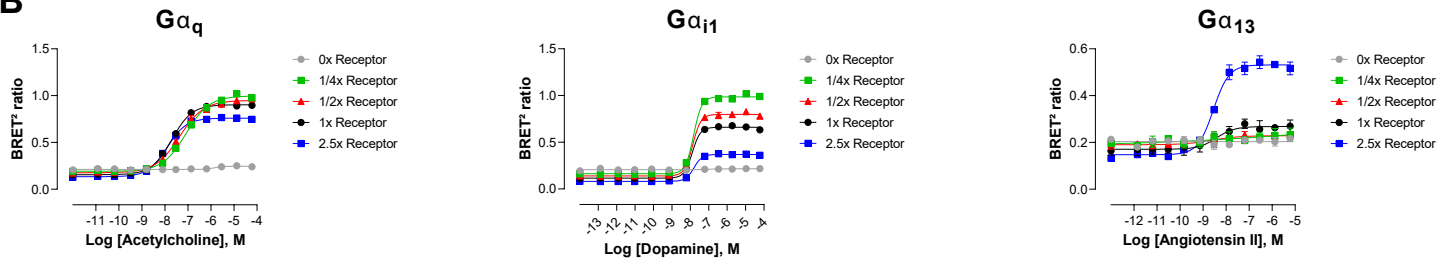

**C**

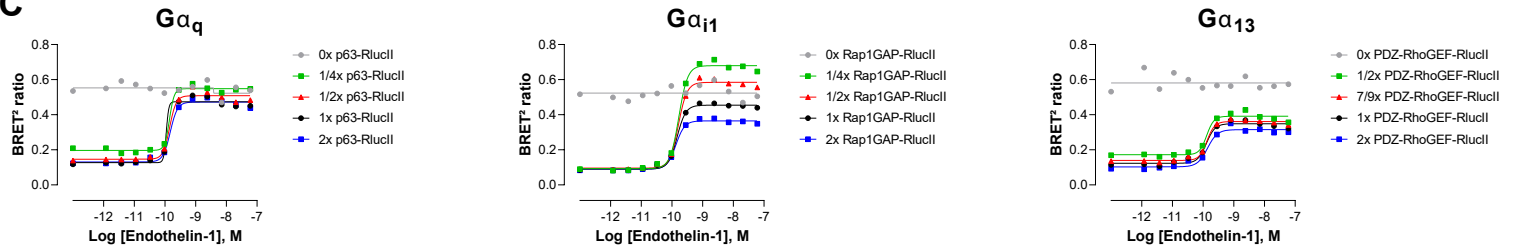

Supplement: supp [file elife_poa_e74101_Figure_2_figure_supplement_3.pdf › elife_poa_e74101_Figure_2_figure_supplement_3.pdf]

Figure 2- figure supplement 4

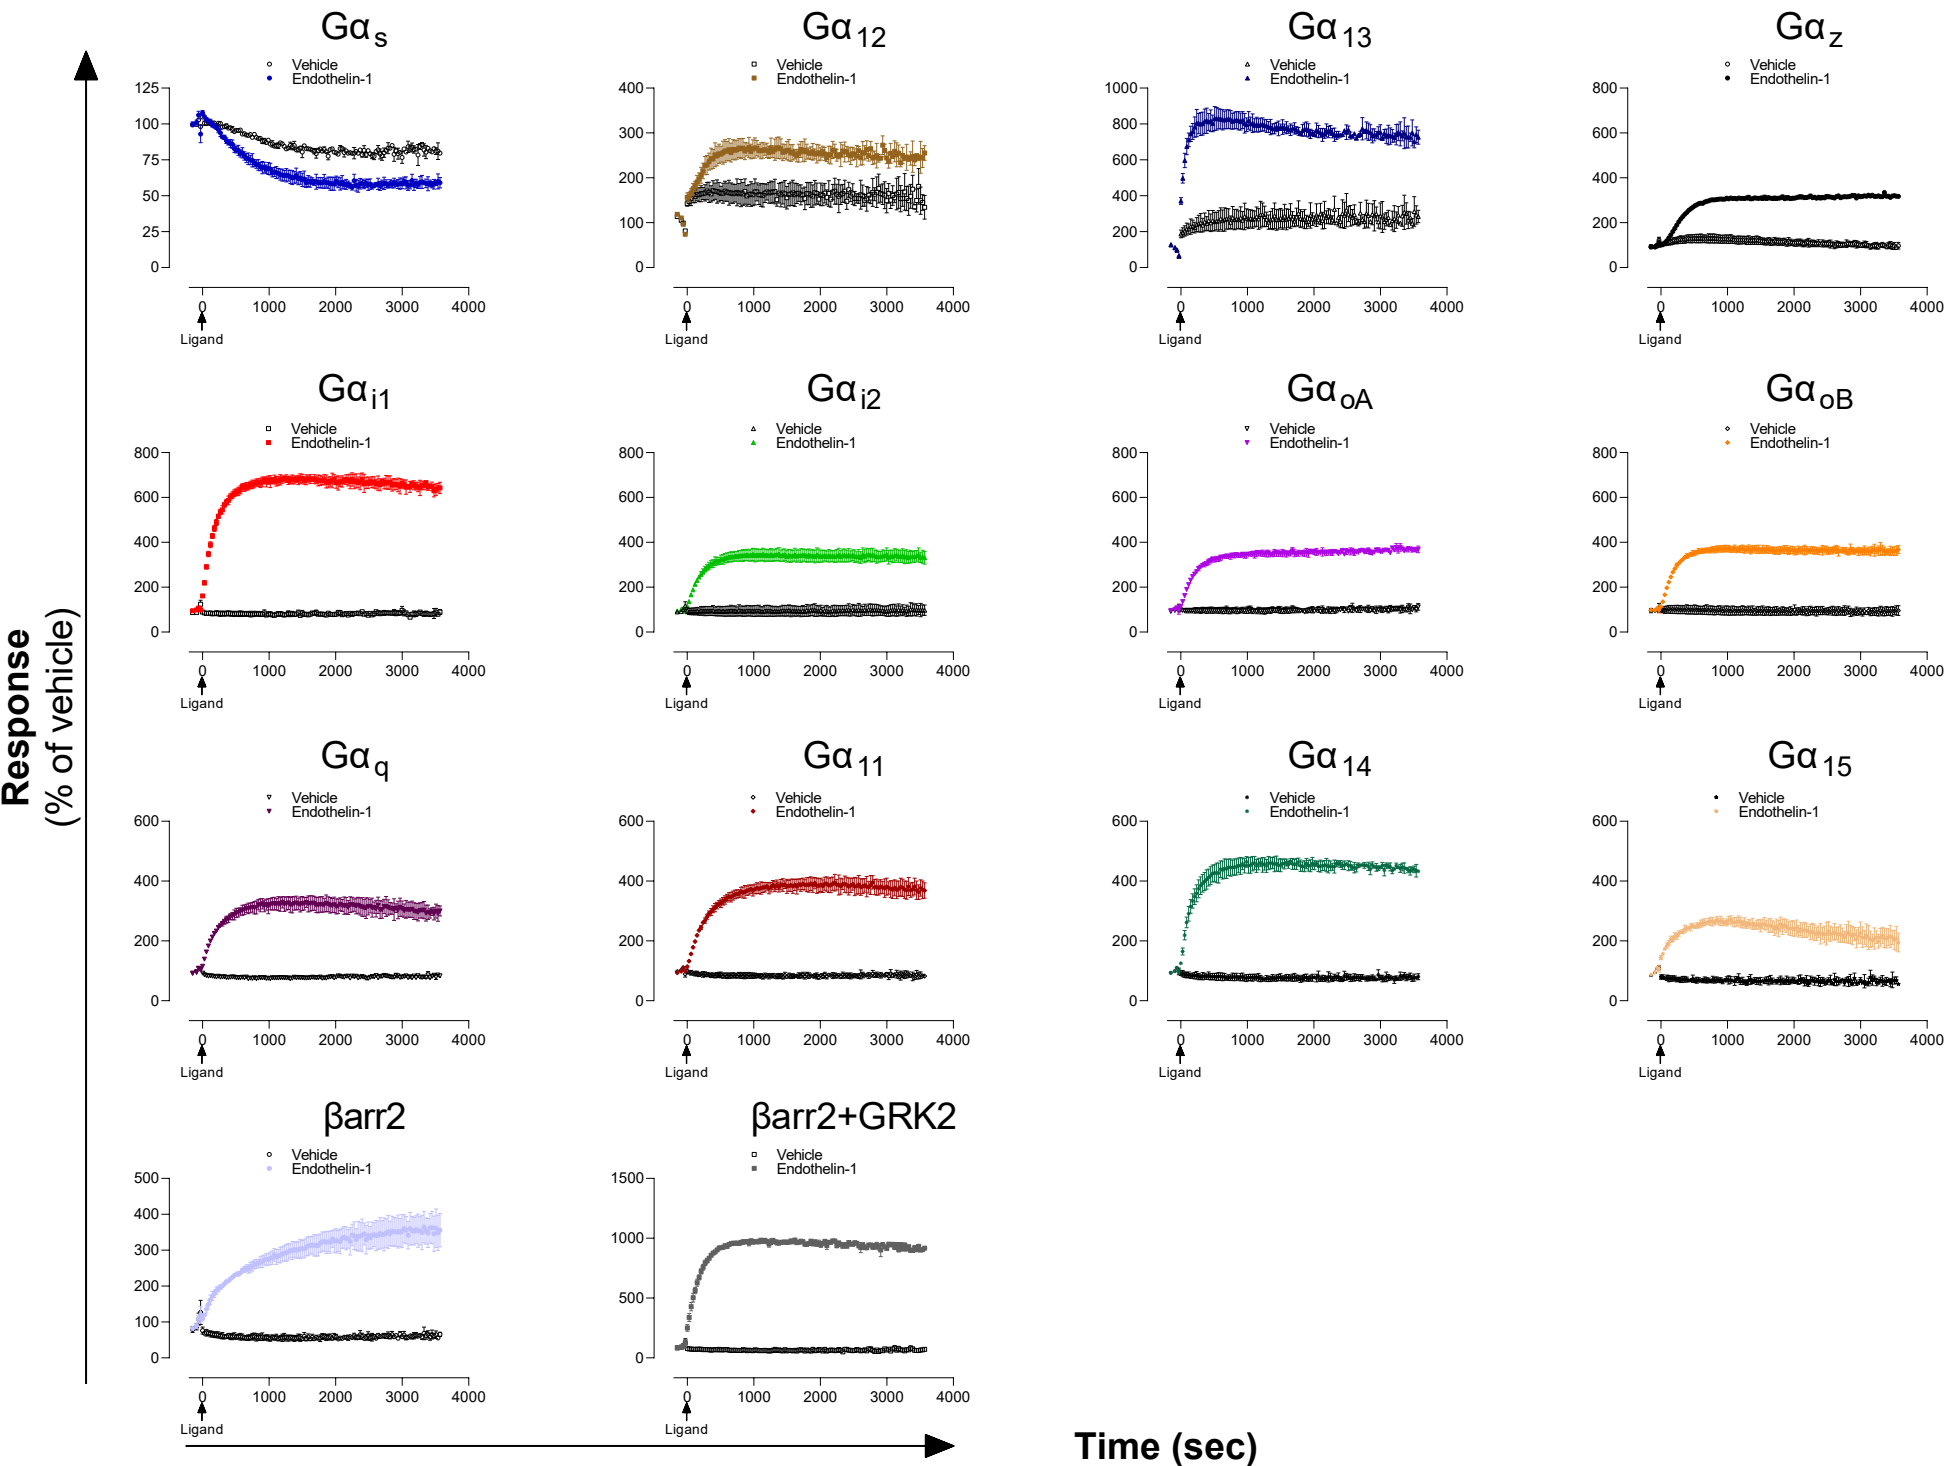

Supplement: supp [file elife_poa_e74101_Figure_2_figure_supplement_4.pdf › elife_poa_e74101_Figure_2_figure_supplement_4.pdf]

Figure 2- figure supplement 5

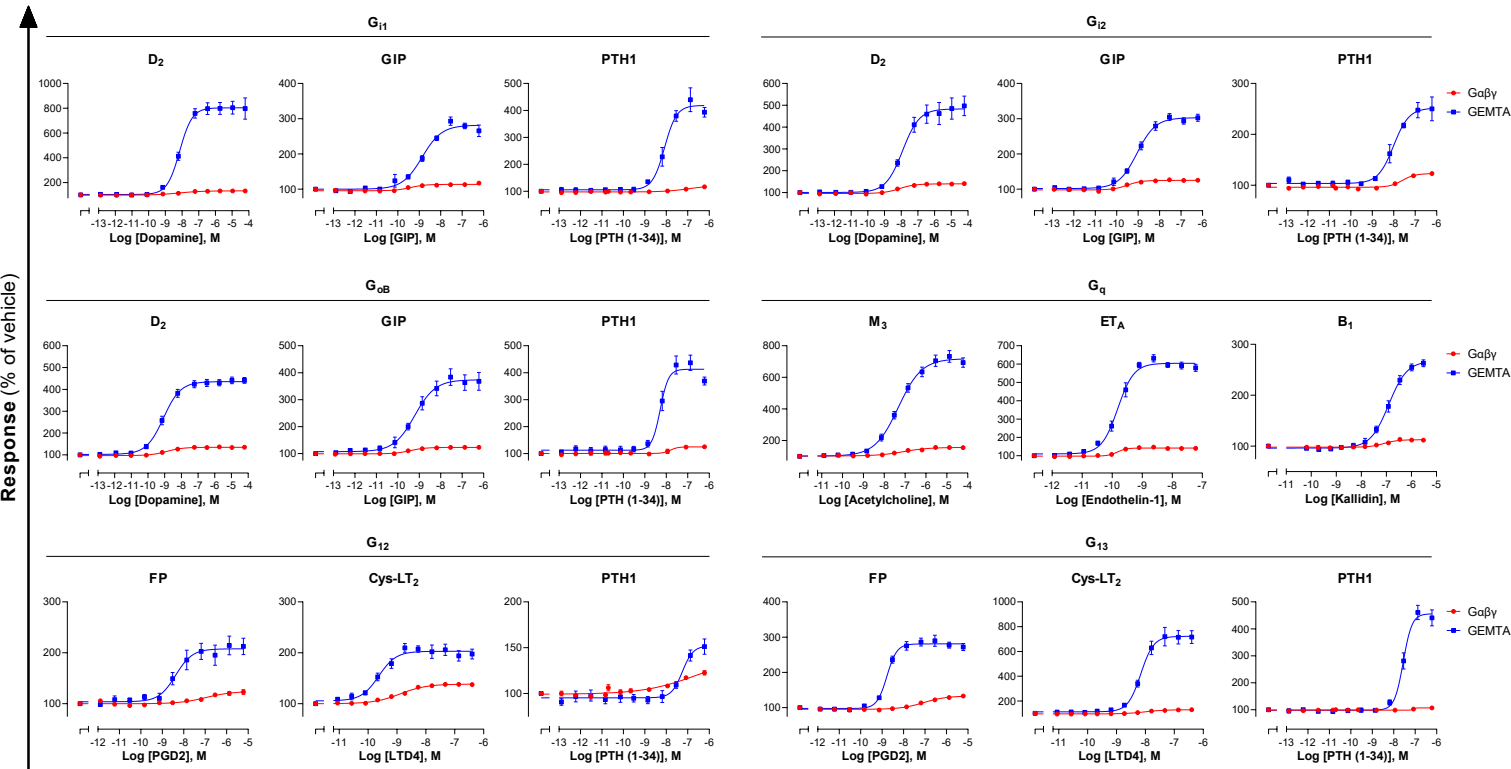

Supplement: supp [file elife_poa_e74101_Figure_2_figure_supplement_5.pdf › elife_poa_e74101_Figure_2_figure_supplement_5.pdf]

Figure 2- figure supplement 6

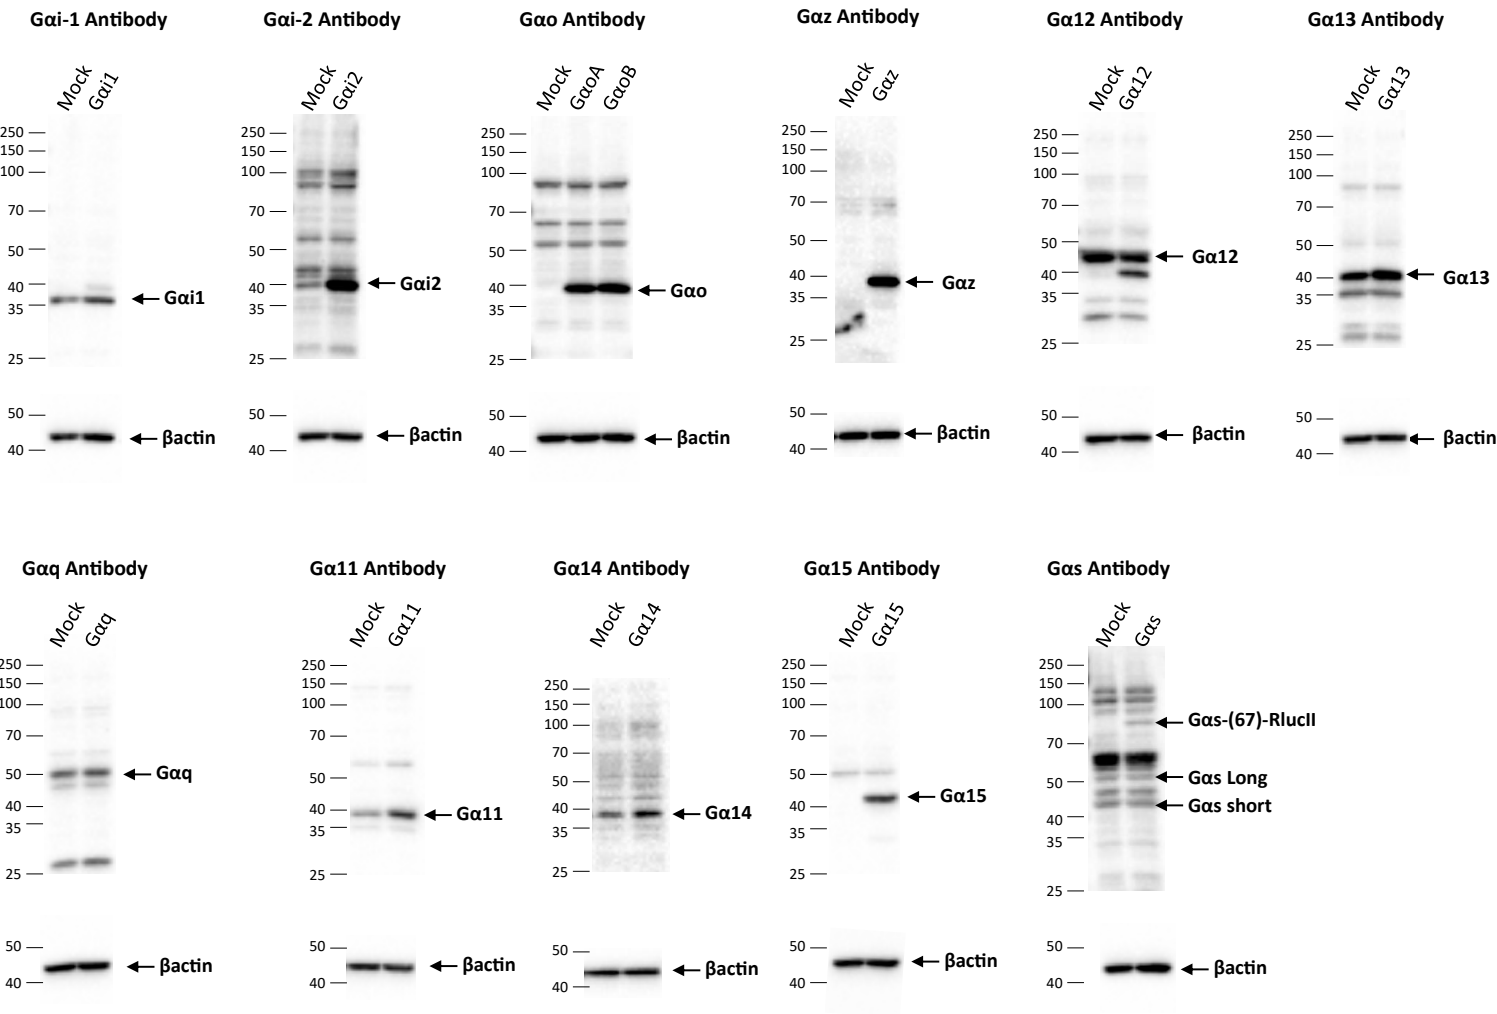

Supplement: supp [file elife_poa_e74101_Figure_2_figure_supplement_6.pdf › elife_poa_e74101_Figure_2_figure_supplement_6.pdf]

Figure 3- figure supplement 2

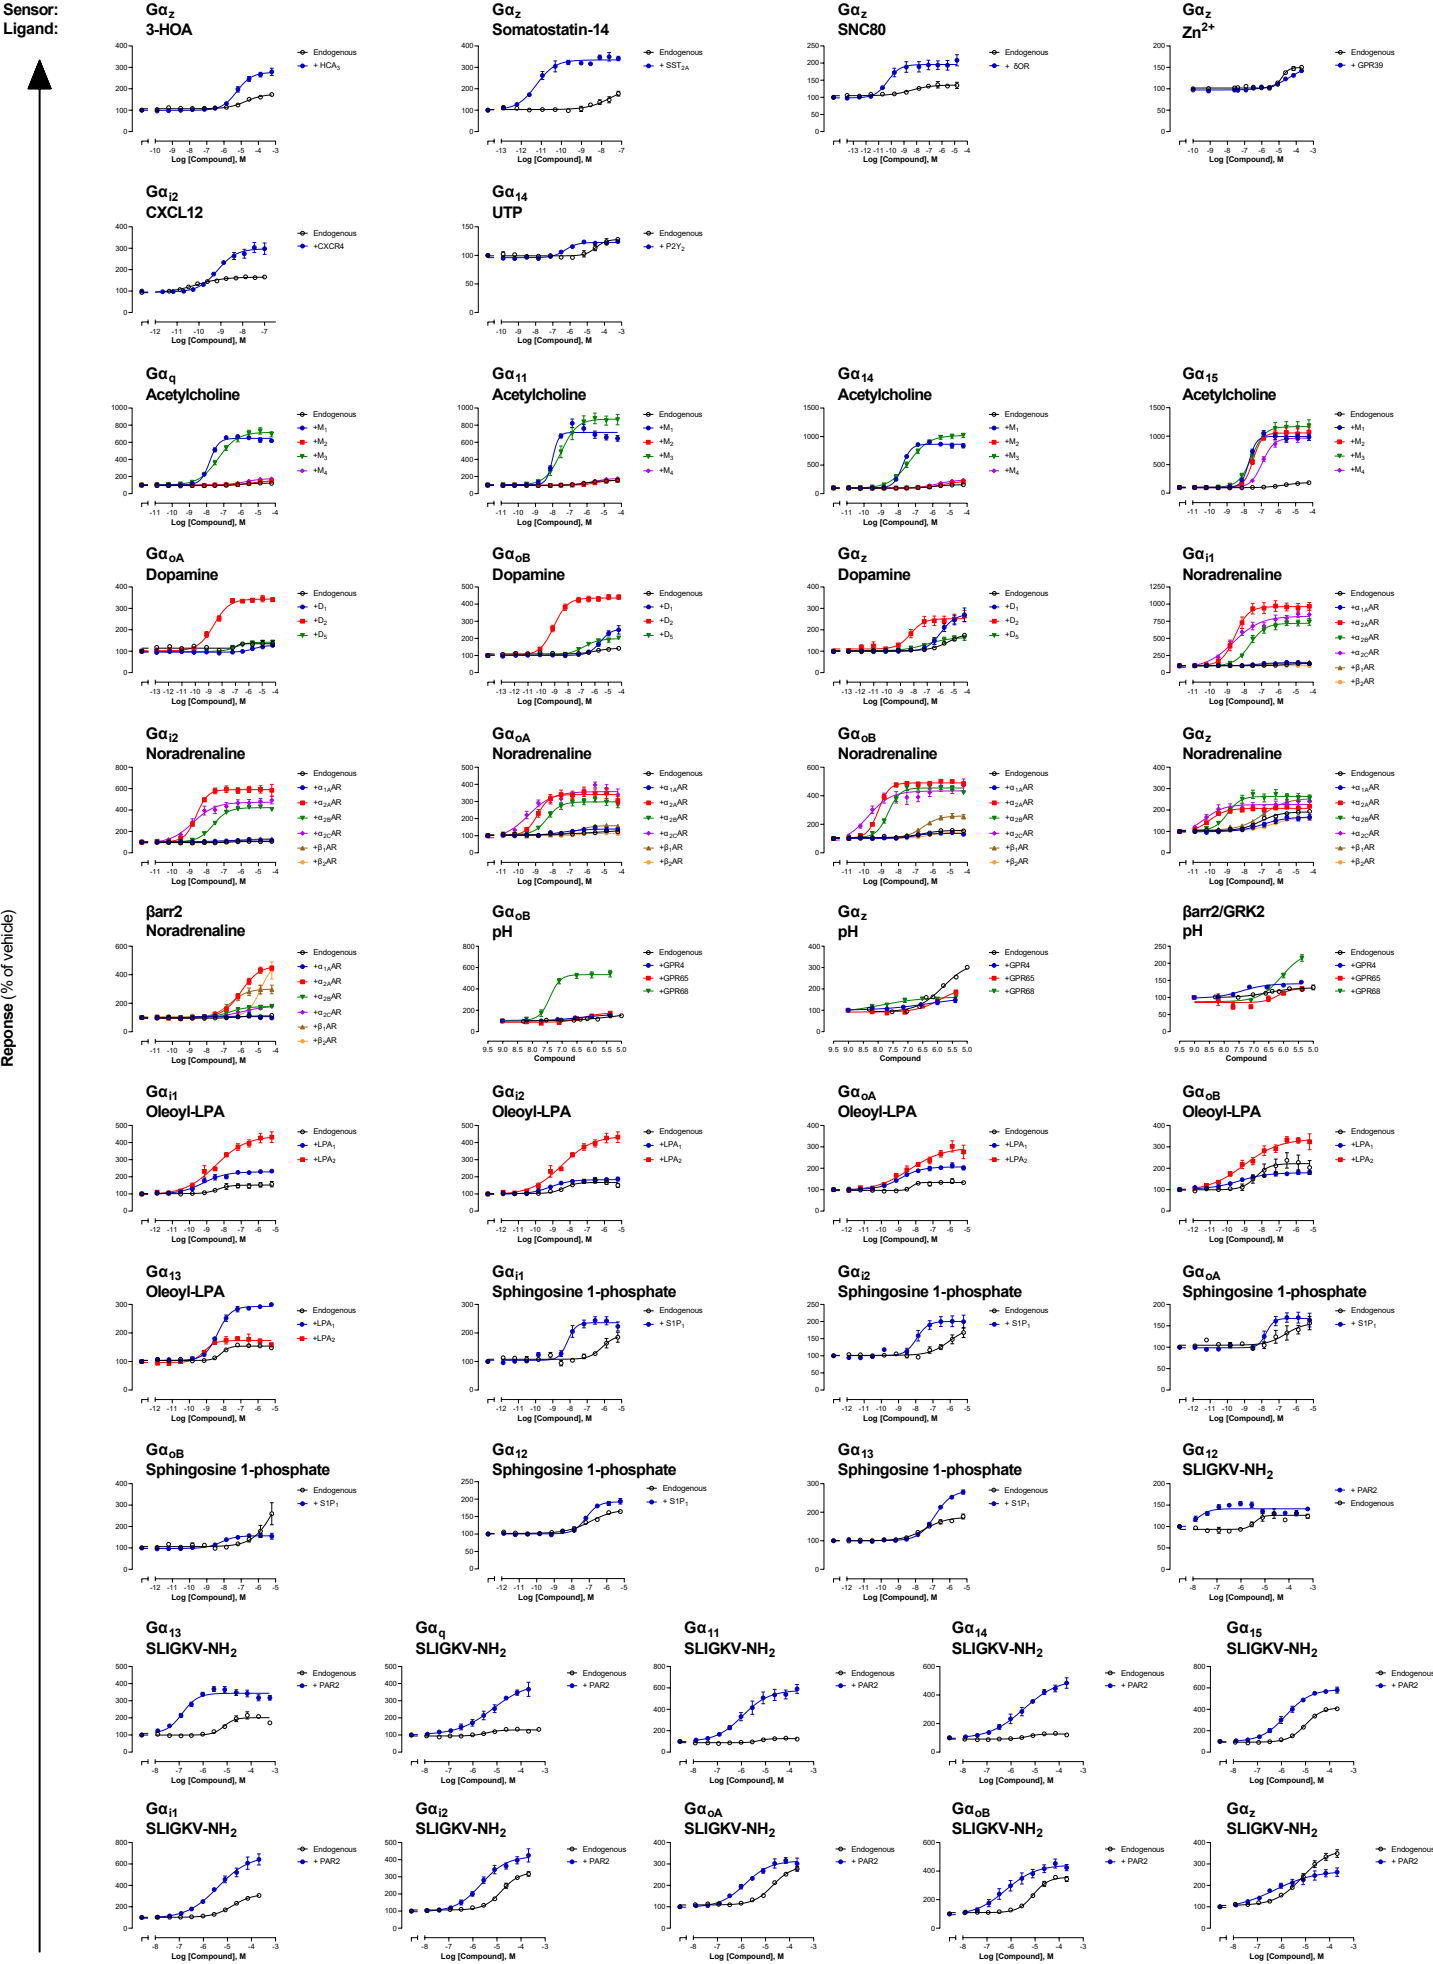

Supplement: supp [file elife_poa_e74101_Figure_3_figure_supplement_2.pdf › elife_poa_e74101_Figure_3_figure_supplement_2.pdf]

Figure 3- figure supplement 3

A

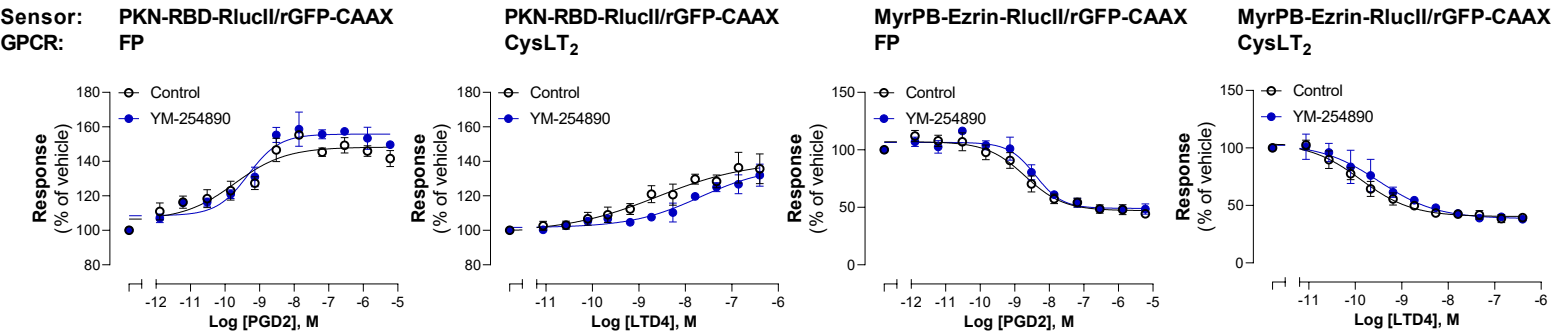

B

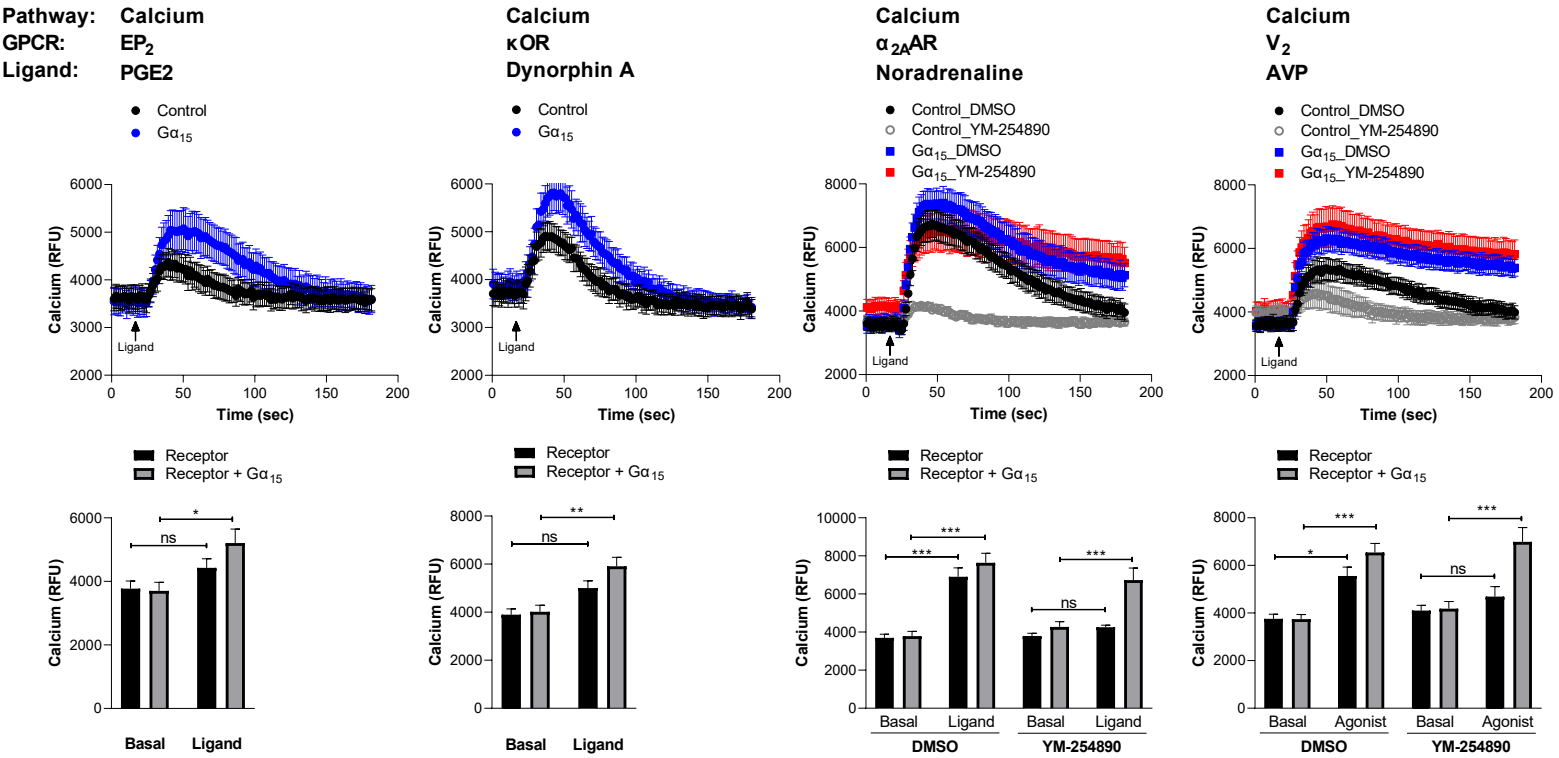

Supplement: supp [file elife_poa_e74101_Figure_3_figure_supplement_3.pdf › elife_poa_e74101_Figure_3_figure_supplement_3.pdf]

Figure 4- figure supplement 1

A

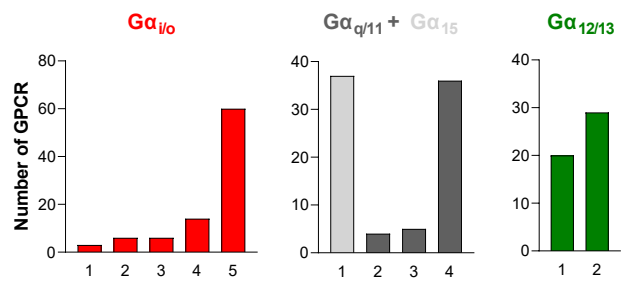

B

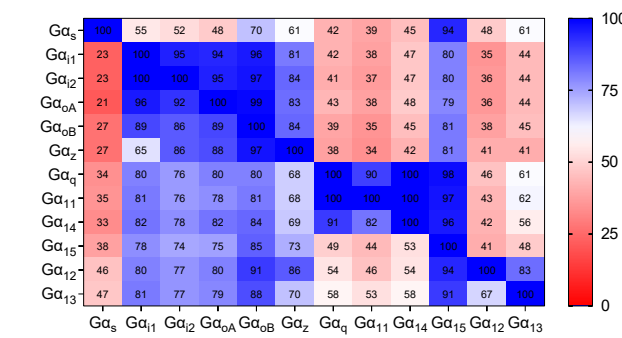

Supplement: supp [file elife_poa_e74101_Figure_4_figure_supplement_1.pdf › elife_poa_e74101_Figure_4_figure_supplement_1.pdf]

Figure 5- figure supplement 1

A

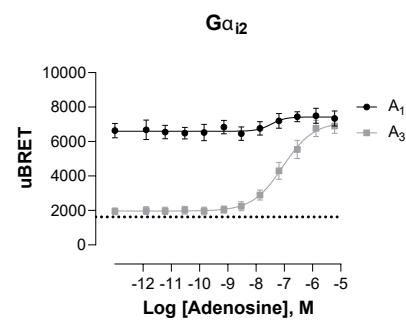

B

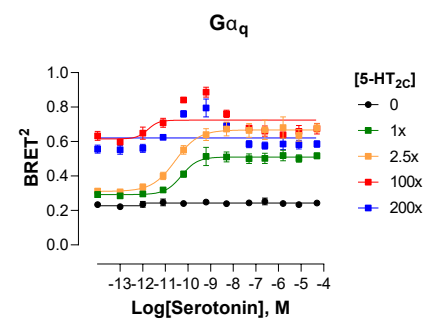

Supplement: supp [file elife_poa_e74101_Figure_5_figure_supplement_1.pdf › elife_poa_e74101_Figure_5_figure_supplement_1.pdf]

Figure 6- figure supplement 1

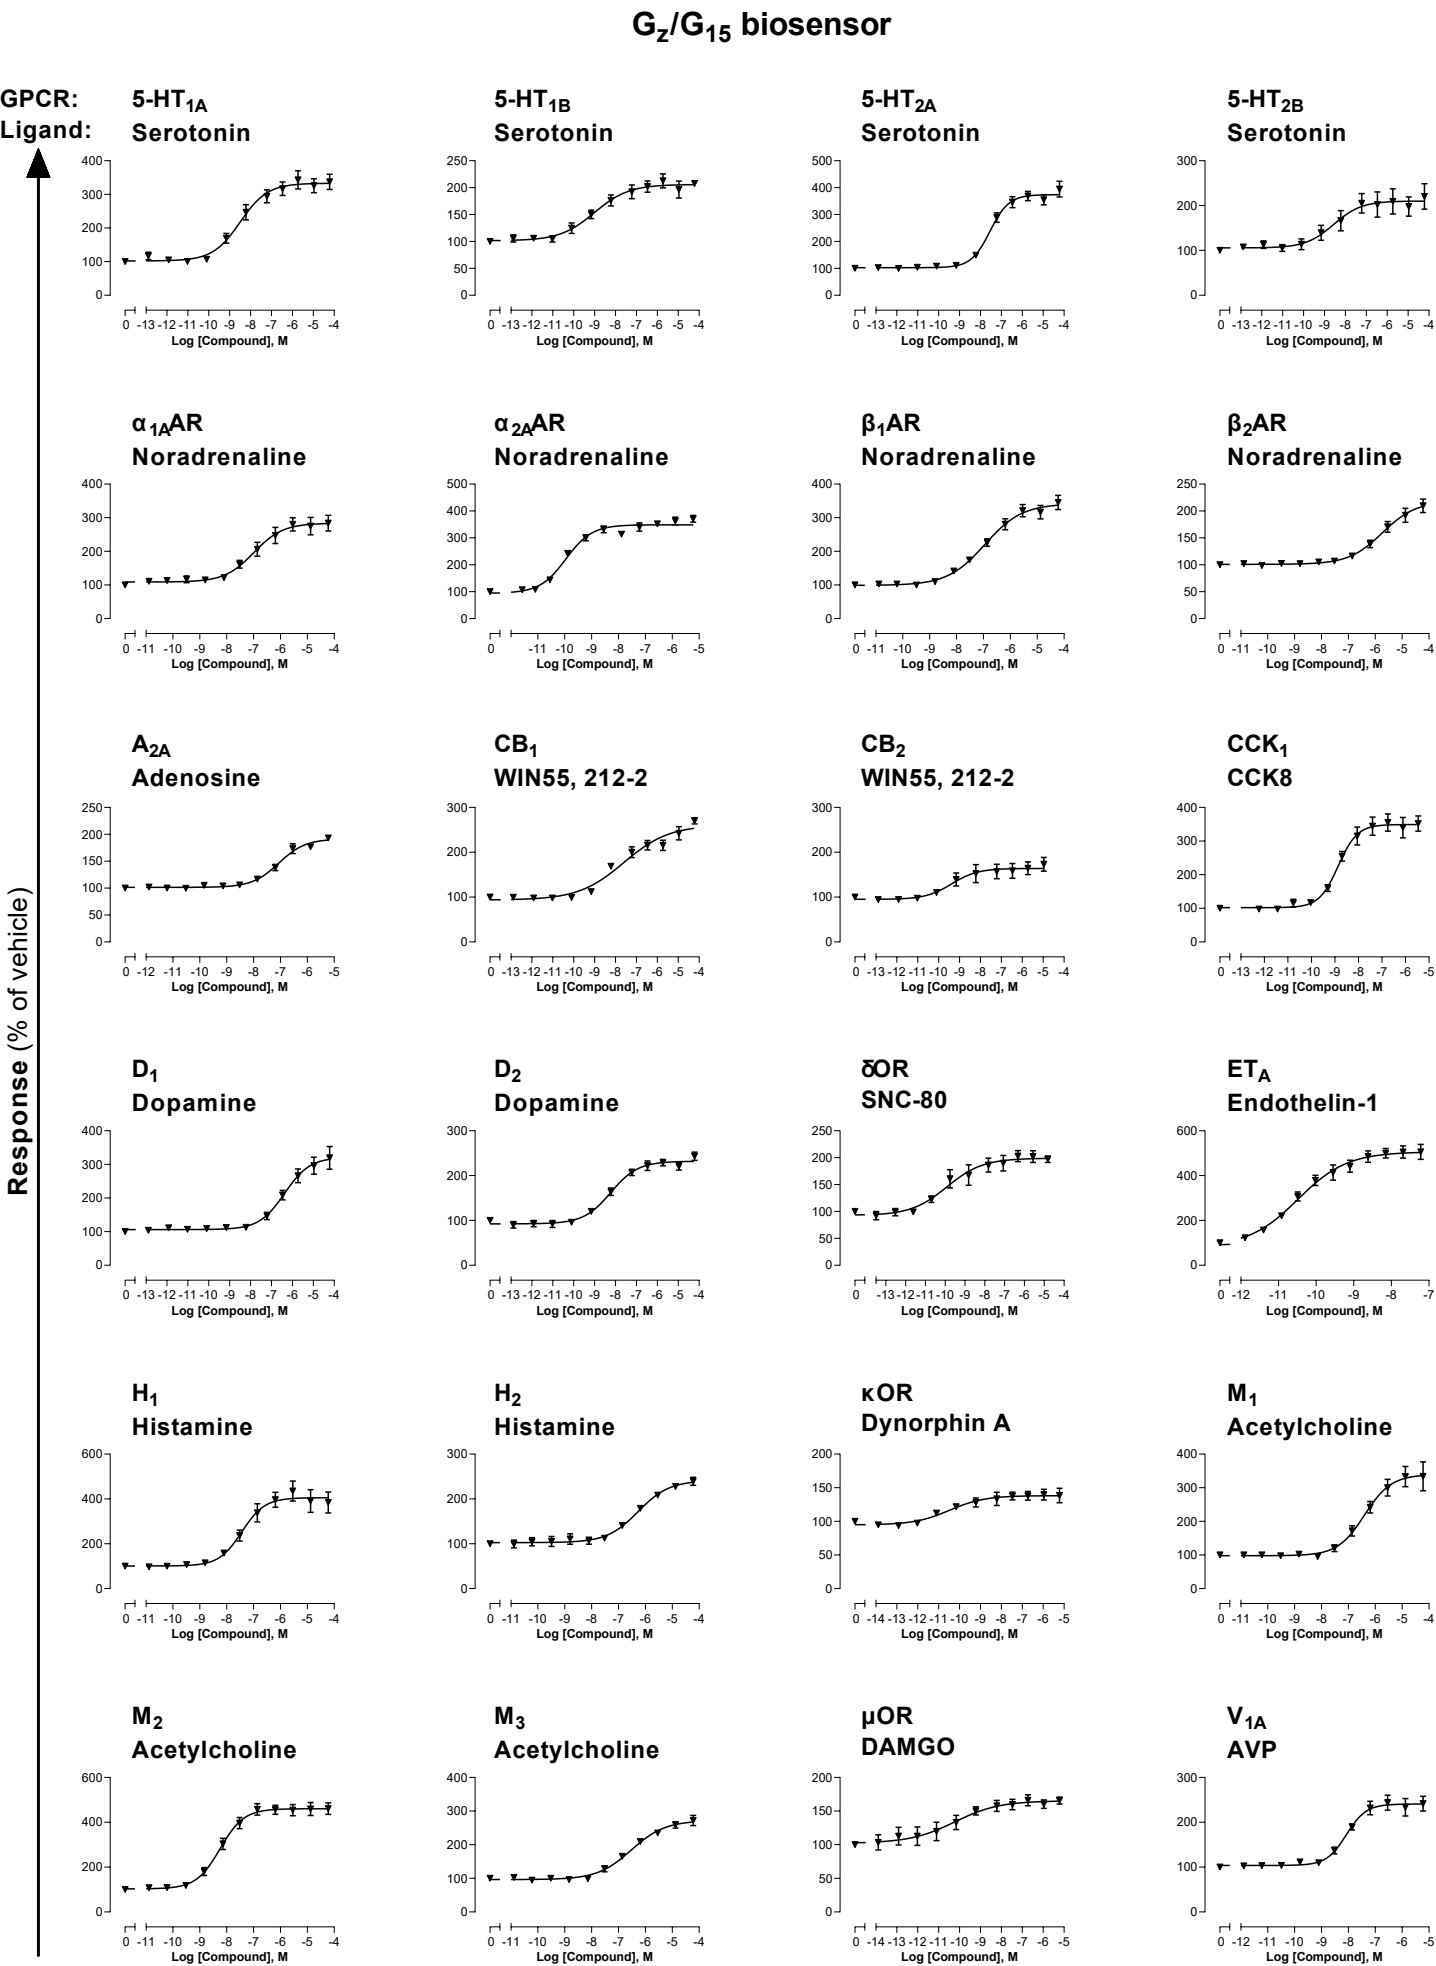

Supplement: supp [file elife_poa_e74101_Figure_6_figure_supplement_1.pdf › elife_poa_e74101_Figure_6_figure_supplement_1.pdf]

Figure 6- figure supplement 2

A

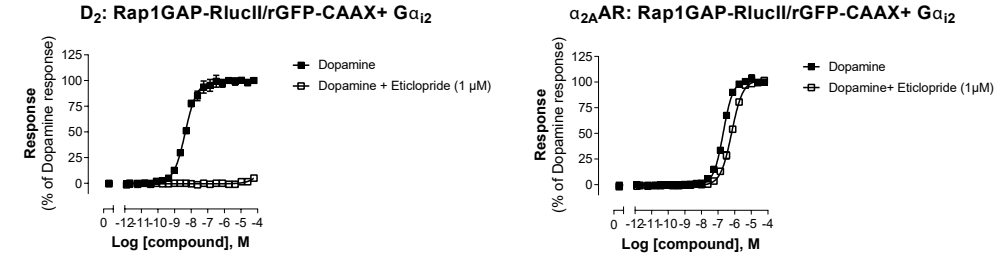

B

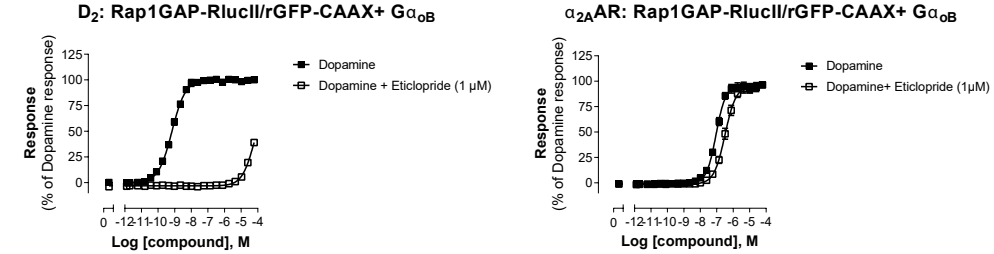

Supplement: supp [file elife_poa_e74101_Figure_6_figure_supplement_2.pdf › elife_poa_e74101_Figure_6_figure_supplement_2.pdf]
